# Supplementary material
Source: publisher figshare collection journal article supplement (https://acs.figshare.com/ndownloader/files/4404940)

# Supporting Information

## Directed Ortho Borylation of Phenol Derivatives Catalyzed by a Silica-Supported Iridium Complex

Kenji Yamazaki, Soichiro Kawamorita, Hirohisa Ohmiya and Masaya Sawamura\*

*Department of Chemistry, Faculty of Science, Hokkaido University, Sapporo 060-0810, Japan*

### Table of Contents

|                               |          |
|-------------------------------|----------|
| Instrumentation and Chemicals | S1       |
| Experimental Procedures       | S2–S3    |
| Compounds Characterization    | S3–S12   |
| References                    | S12–S13  |
| NMR spectra                   | S14–S103 |

### Instrumentation and Chemicals

NMR spectra were recorded on a Varian Gemini 2000 spectrometer, operating at 300 MHz for  $^1\text{H}$  NMR and 75.4 MHz for  $^{13}\text{C}$  NMR. Chemical shift values for  $^1\text{H}$  and  $^{13}\text{C}$  are reference to  $\text{Me}_4\text{Si}$  and the residual solvent resonances respectively. Chemical shifts are reported in  $\delta$  ppm. Elemental analysis was performed at the Center for Instrument Analysis, Hokkaido University. High-resolution mass spectra were recorded on a Thermo Scientific Exactive or JEOL JMS-T100GC mass spectrometer at the Center for Instrument Analysis, Hokkaido University. TLC analyses were performed on commercial glass plates bearing 0.25-mm layer of Merck Silica gel 60F<sub>254</sub>. Silica gel (Kanto Chemical Co., Silica gel 60 N, spherical, neutral) was used for column chromatography. Gas chromatographic (GC) analyses were conducted on a Shimadzu GC-14B equipped with a flame ionization detector. Gel permeation chromatography (GPC) was performed by LC-908 (Japan Analytical Industry Ltd., two in-line JAIGEL-2H,  $\text{CHCl}_3$ , 3.5 mL/min, UV and RI detectors).

All reactions were carried out under nitrogen or argon atmosphere. Materials were obtained from commercial suppliers or prepared according to standard procedures unless otherwise noted. Silica-SMAP was prepared according to the reported procedure.<sup>1</sup> All solvents for catalytic reactions were degassed via four freeze–pump–thaw cycles before use.  $[\text{Ir}(\text{OMe})(\text{cod})]_2$  was prepared according to the literature.<sup>2</sup> Pinacoloborane and bis(pinacolato)diboron were purchased from

Aldrich and AllyChem Co., Ltd, respectively.

## Experimental Procedures

### Typical Procedure for the Ortho-Borylation of Phenyl Diethylcarbamate (**3aa**) (Scheme 1).

In a glove box, Silica-SMAP (**1**, 0.064 mmol  $\text{P g}^{-1}$ , 40 mg, 0.0025 mmol), anhydrous, degassed hexane (1.1 mL), and  $[\text{Ir}(\text{OMe})(\text{cod})]_2$  (0.8 mg, 0.00125 mmol) in hexane (0.4 mL) were placed in a 10 mL-glass tube containing a magnetic stirring bar, and the mixture was stirred for 1 min at 25 °C. **3aa** (196.5 mg, 1.0 mmol), and pinacolborane (**2**, 62.8 mg, 0.5 mmol) were added in the tube, which was then sealed with a screw cap. The tube was removed from the glove box. After the resulting mixture was stirred at 70 °C for 12 h, the mixture was filtered through a glass pipet equipped with a cotton filter. Solvent was removed under reduced pressure. An internal standard (1,1,2,2-tetrachloroethane) was added to the reaction mixture. The yield of the product was determined by  $^1\text{H}$  NMR. The crude material was purified by GPC to give the borylation product **4aa** (100.5 mg, 0.32 mmol) in 64% isolated yield.

### Suzuki–Miyaura Cross-Coupling/Deprotection of Carbamate (Scheme 2, upper side).

2-(4,4,5,5-Tetramethyl-1,3,2-dioxaborolan-2-yl)phenyl *N,N*-diethylcarbamate (**4aa**) (96.6 mg, 0.30 mmol), 2-bromothiophene (62.9 mg, 0.36 mmol),  $\text{Na}_2\text{CO}_3$  (256.0 mg, 2.4 mmol) and  $\text{Pd}(\text{PPh}_3)_4$  (18.1 mg, 0.015 mmol) in a mixed solvent consisting of DME (1.0 mL) and  $\text{H}_2\text{O}$  (0.1 mL) were placed in 10 mL-glass tube containing a magnetic stirring bar. The tube was then sealed with a screw cap in argon. After being stirred at 90 °C for 24 h, the glass tube was cooled to rt. The reaction mixture was washed with water and brine, and was dried over  $\text{MgSO}_4$ . Solvent was removed under reduced pressure. The crude material was dissolved in  $\text{Et}_2\text{O}$  (5.0 mL), and the solution was added to a suspension of  $\text{LiAlH}_4$  (34.1 mg, 0.9 mmol) in  $\text{Et}_2\text{O}$  (10.0 mL) in a two-neck round-bottom flask equipped with a reflux condenser. After being stirred at reflux for 7 h, the flask was cooled to room temperature, and water (5.0 mL) and 1M HCl aq (5.0 mL) were in turn added to the reaction mixture at 0 °C. The mixture was extracted with EtOAc (2 × 20 mL). The combined organic layers were washed with brine and dried over  $\text{MgSO}_4$ . The solvent was evaporated. Flash silica gel column chromatography (hexane/EtOAc 90:10) of the crude product provided **6** (36.2 mg, 0.20 mmol) in 68% yield. Spectral data match those previously reported.<sup>3</sup>

### Suzuki–Miyaura Cross-Coupling/Ni-Catalyzed Cross-Coupling (Scheme 2, bottom side).

2-(4,4,5,5-Tetramethyl-1,3,2-dioxaborolan-2-yl)phenyl *N,N*-diethylcarbamate (**4aa**) (96.1 mg, 0.30 mmol), 2-bromobenzene (58.1 mg, 0.37 mmol),  $\text{Na}_2\text{CO}_3$  (258.1 mg, 2.4 mmol),  $\text{Pd}(\text{PPh}_3)_4$  (17.7 mg, 0.015 mmol) in a mix solvent consisting of DME (1.0 ml) and  $\text{H}_2\text{O}$  (0.1 ml) were placed in a 10

mL-glass tube containing a magnetic stirring bar. The tube was then sealed with a screw cap under argon. After being stirred at 90 °C for 24 h, the glass tube was cooled to rt. The reaction mixture was washed with water and brine, and was dried over MgSO<sub>4</sub>. After filtration, the solvent was evaporated. Flash silica gel column chromatography (hexane/EtOAc 95:5) of the crude product provided **7** (65.4 mg, 0.24 mmol) in 81% yield. In a glove box, **7** (65.4 mg, 0.24 mmol), Ni(acac)<sub>2</sub> (3.4 mg, 0.013 mmol), 1-[2-(diphenylphosphino)phenyl]ethanol (3.7 mg, 0.012 mmol) in Et<sub>2</sub>O (0.6 mL) and anhydrous, degassed Et<sub>2</sub>O (0.9 mL) were placed sequentially in a 10 mL-glass tube containing a magnetic stirring bar, which was then sealed with a screw cap. The tube was removed from the glove box, and 4-methoxyphenylmagnesium bromide (480 μL, 0.48 mmol, 1.0 M in Et<sub>2</sub>O) was added to the tube. After being stirred at room temperature for 41 h, sat. NH<sub>4</sub>Cl was added to the reaction mixture. The mixture was extracted with EtOAc (2 × 20 mL). The combined organic layers were washed with brine and dried over MgSO<sub>4</sub>. The solvent was evaporated. Flash silica gel column chromatography (hexane/EtOAc 95:5) of the crude product provided **8** (50.8 mg, 0.20 mmol) in 80% yield. Spectral data match those previously reported.<sup>4</sup>

## Compounds Characterization

The phenol derivatives **3ab**, **3ac**, **3ad**, **3ae**, **3af** and **3ah** are known compounds. The Starting materials **3aa**,<sup>5</sup> **3ag**,<sup>6</sup> **3b**,<sup>7</sup> **3c**,<sup>8</sup> **3d**,<sup>8</sup> **3g**,<sup>9</sup> **3i**,<sup>5</sup> **3l**<sup>10</sup> and **3m**<sup>9</sup> shown in Scheme 1 and Table 1 are known compounds. Compound **4aa** is found in the literature.<sup>11</sup> The borylation products **4aa** and **4b–4s** were purified by GPC.

### 2-Methyl-6-(4,4,5,5-tetramethyl-1,3,2-dioxaborolan-2-yl)phenyl *N,N*-Diethylcarbamate (**4b**)

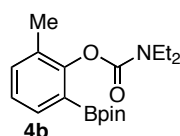

Colorless oil. <sup>1</sup>H NMR (CDCl<sub>3</sub>) δ 1.18–1.33 (m, 6H), 1.30 (s, 12H), 2.21 (s, 3H), 3.39 (q, *J* = 7.2 Hz, 2H), 3.52 (q, *J* = 7.2 Hz, 2H), 7.10 (t, *J* = 7.2 Hz, 1H), 7.28 (d, *J* = 7.2 Hz, 1H), 7.60 (d, *J* = 7.2 Hz, 1H). <sup>13</sup>C NMR (CDCl<sub>3</sub>) δ 13.32, 14.05, 16.16, 24.70, 41.53, 41.90, 83.32, 124.92, 130.56, 133.84, 133.88, 154.29, 154.69. A signal for the carbon directly attached to the boron atom was not observed. **Anal.** Calcd for C<sub>18</sub>H<sub>28</sub>BNO<sub>4</sub>: C, 64.88%; H, 8.47%; N, 4.20%. Found: C, 64.65%; H, 8.55%; N, 4.22%.

### 5-Methyl-2-(4,4,5,5-tetramethyl-1,3,2-dioxaborolan-2-yl)phenyl *N,N*-Diethylcarbamate (**4c**)

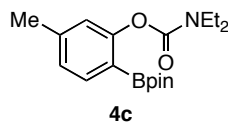

Colorless oil.  $^1\text{H NMR}$  ( $\text{CDCl}_3$ )  $\delta$  1.17–1.33 (m, 6H), 1.29 (s, 12H), 2.34 (s, 3H), 3.38 (q,  $J = 6.9$  Hz, 2H), 3.50 (q,  $J = 7.2$  Hz, 2H), 6.90 (s, 1H), 7.01 (d,  $J = 7.5$  Hz, 1H), 7.66 (d,  $J = 7.5$  Hz, 1H).  $^{13}\text{C NMR}$  ( $\text{CDCl}_3$ )  $\delta$  13.20, 13.79, 21.16, 24.60, 41.40, 41.72, 83.16, 122.87, 125.65, 136.11, 142.77, 154.87, 156.33. A signal for the carbon directly attached to the boron atom was not observed. **Anal.** Calcd for  $\text{C}_{18}\text{H}_{28}\text{BNO}_4$ : C, 64.88%; H, 8.47%; N, 4.20%. Found: C, 64.60%; H, 8.54%; N, 4.21%.

**5-Methoxy-2-(4,4,5,5-tetramethyl-1,3,2-dioxaborolan-2-yl)phenyl *N,N*-Diethylcarbamate (4d)**

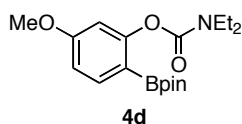

Colorless oil.  $^1\text{H NMR}$  ( $\text{CDCl}_3$ )  $\delta$  1.18–1.31 (m, 6H), 1.29 (s, 12H), 3.38 (q,  $J = 7.2$  Hz, 2H), 3.51 (q,  $J = 7.2$  Hz, 2H), 3.81 (s, 3H), 6.63 (d,  $J = 2.4$  Hz, 1H), 6.75 (dd,  $J = 8.4, 2.4$  Hz, 1H), 7.70 (d,  $J = 8.4$  Hz, 1H).  $^{13}\text{C NMR}$  ( $\text{CDCl}_3$ )  $\delta$  13.25, 13.86, 24.68, 41.48, 41.79, 55.18, 83.13, 108.02, 111.11, 137.31, 154.70, 157.92, 163.09. A signal for the carbon directly attached to the boron atom was not observed. **HRMS–ESI** ( $m/z$ ):  $[\text{M}+\text{Na}]^+$  calcd for  $\text{C}_{18}\text{H}_{28}\text{O}_5\text{NBNa}$ , 372.19527; found, 372.19570.

**3-Trifluoromethylphenyl *N,N*-Diethylcarbamate (3e)**

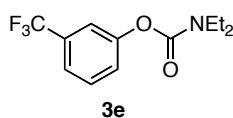

Colorless oil.  $^1\text{H NMR}$  ( $\text{CDCl}_3$ )  $\delta$  1.19–1.29 (m, 6H), 3.36–3.49 (m, 4H), 7.34 (m, 1H), 7.40 (s, 1H), 7.44–7.51 (m, 2H).  $^{13}\text{C NMR}$  ( $\text{CDCl}_3$ )  $\delta$  13.14, 14.06, 41.88, 42.29, 119.05 (q,  $J = 4.0$  Hz), 121.87 (q,  $J = 3.4$  Hz), 123.71 (q,  $J = 273.7$  Hz), 125.45 (d,  $J = 1.1$  Hz), 129.77, 131.73 (q,  $J = 32.6$  Hz), 151.72, 153.70, 156.23. **Anal.** Calcd for  $\text{C}_{12}\text{H}_{14}\text{F}_3\text{NO}_2$ : C, 55.17%; H, 5.40%; N, 5.36%. Found: C, 55.07%; H, 5.32%; N, 5.34%.

**2-(4,4,5,5-Tetramethyl-1,3,2-dioxaborolan-2-yl)-5-trifluoromethylphenyl *N,N*-Diethylcarbamate (4e)**

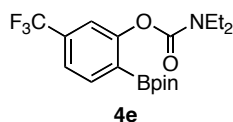



Colorless oil.  $^1\text{H NMR}$  ( $\text{CDCl}_3$ )  $\delta$  1.18–1.31 (m, 6H), 1.31 (s, 12H), 3.39 (q,  $J = 7.2$  Hz, 2H), 3.49 (q,  $J = 7.2$  Hz, 2H), 7.33 (s, 1H), 7.44 (d,  $J = 7.8$  Hz, 1H), 7.88 (d,  $J = 7.8$  Hz, 1H).  $^{13}\text{C NMR}$  ( $\text{CDCl}_3$ )  $\delta$  13.20, 13.84, 24.70, 41.59, 41.97, 83.92, 119.23 (q,  $J = 4.0$  Hz), 121.36 (q,  $J = 3.4$  Hz), 123.65 (q,  $J = 273.1$  Hz), 133.89 (q,  $J = 33.2$  Hz), 136.68, 154.41, 156.23. A signal for the carbon directly attached to the boron atom was not observed. **HRMS–ESI** ( $m/z$ ):  $[\text{M}+\text{Na}]^+$  calcd for  $\text{C}_{18}\text{H}_{25}\text{O}_4\text{BF}_3\text{NNa}$ , 410.17209; found, 410.17247. The regioselectivity was assigned on the basis of the  $J_{\text{C-F}}$  values in the  $^{13}\text{C NMR}$  spectrum.

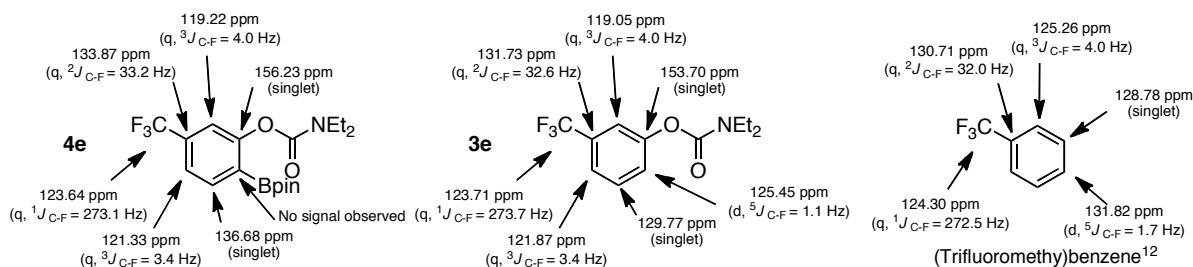

### (1,1'-Biphenyl)-3-yl *N,N*-Diethylcarbamate (3f)

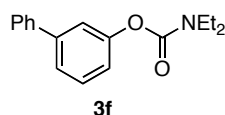

Colorless oil.  $^1\text{H NMR}$  ( $\text{CDCl}_3$ )  $\delta$  1.20–1.30 (m, 6H), 3.38–3.50 (m, 4H), 7.12 (m, 1H), 7.31–7.37 (m, 2H), 7.40–7.45 (m, 4H), 7.58–7.61 (m, 2H).  $^{13}\text{C NMR}$  ( $\text{CDCl}_3$ )  $\delta$  13.16, 14.03, 41.72, 42.07, 120.51, 120.55, 123.79, 127.16, 127.46, 128.69, 129.44, 140.43, 142.57, 151.94, 154.20. **Anal.** Calcd for  $\text{C}_{17}\text{H}_{19}\text{NO}_2$ : C, 75.81%; H, 7.11%; N, 5.20%. Found: C, 75.85%; H, 7.17%; N, 5.21%.

### 5-Phenyl-2-(4,4,5,5-tetramethyl-1,3,2-dioxaborolan-2-yl)phenyl *N,N*-Diethylcarbamate (4f)

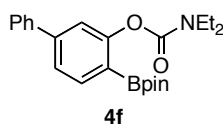

Colorless oil.  $^1\text{H NMR}$  ( $\text{CDCl}_3$ )  $\delta$  1.19–1.32 (m, 6H), 1.32 (s, 12H), 3.40 (q,  $J = 6.9$  Hz, 2H), 3.53 (q,  $J = 7.2$  Hz, 2H), 7.31 (d,  $J = 1.8$  Hz, 1H), 7.36 (dm,  $J = 7.2$  Hz, 1H), 7.40 (m, 1H), 7.61 (dm,  $J = 7.2$  Hz, 2H), 7.84 (d,  $J = 7.8$  Hz, 1H).  $^{13}\text{C NMR}$  ( $\text{CDCl}_3$ )  $\delta$  13.26, 13.88, 24.69, 41.51, 41.82, 83.41, 120.90, 123.44, 127.19, 127.73, 128.70, 136.64, 140.22, 145.28, 154.82, 156.72. A signal for the carbon directly attached to the boron atom was not observed. **HRMS–ESI** ( $m/z$ ):  $[\text{M}+\text{Na}]^+$  calcd for  $\text{C}_{23}\text{H}_{30}\text{O}_4\text{NBNa}$ , 418.21601; found, 418.21634.

### 5-Chloro-2-(4,4,5,5-tetramethyl-1,3,2-dioxaborolan-2-yl)phenyl *N,N*-Diethylcarbamate (4g)

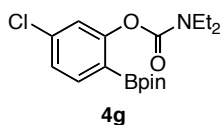

Colorless oil.  $^1\text{H NMR}$  ( $\text{CDCl}_3$ )  $\delta$  1.17–1.33 (m, 6H), 1.30 (s, 12H), 3.38 (q,  $J = 7.2$ , Hz, 2H), 3.49 (q,  $J = 7.2$  Hz, 2H), 7.11 (d,  $J = 1.8$  Hz, 1H), 7.18 (dd,  $J = 8.1$ , 1.8 Hz, 1H), 7.70 (d,  $J = 8.1$  Hz, 1H).  $^{13}\text{C NMR}$  ( $\text{CDCl}_3$ )  $\delta$  13.18, 13.81, 24.65, 41.52, 41.89, 83.59, 122.85, 125.11, 137.00, 137.49, 154.33, 156.79. A signal for the carbon directly attached to the boron atom was not observed. **Anal.** Calcd for  $\text{C}_{17}\text{H}_{25}\text{BClNO}_4$ : C, 57.74%; H, 7.13%; N, 3.96%. Found: C, 57.49%; H, 7.10%; N, 3.88%. The synthesis of known compound 4-chloro-4'-methoxy-[1,1'-biphenyl]-2-ol<sup>13</sup> from **4g** by Suzuki-Miyaura coupling followed by deprotection of the carbamate moiety confirmed the assignment for **4g**.

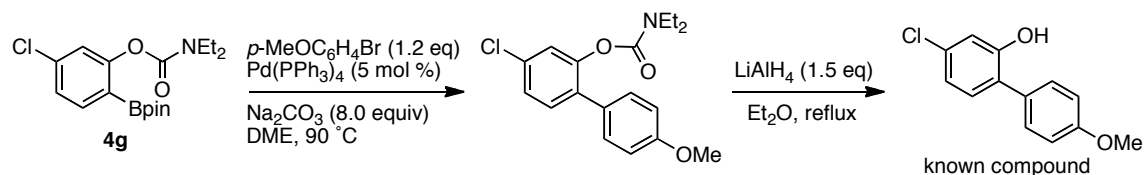

#### 4-Methylphenyl Diethylcarbamate (**3h**)

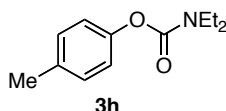

Colorless oil.  $^1\text{H NMR}$  ( $\text{CDCl}_3$ )  $\delta$  1.20–1.24 (m, 6H), 2.33 (s, 3H), 3.37–3.44 (m, 4H), 6.99 (dm,  $J = 8.1$  Hz, 2H), 7.15 (d,  $J = 8.1$  Hz, 2H).  $^{13}\text{C NMR}$  ( $\text{CDCl}_3$ )  $\delta$  13.13, 13.93, 20.52, 41.58, 41.93, 121.37, 129.60, 134.45, 149.27, 154.42. **Anal.** Calcd for  $\text{C}_{12}\text{H}_{17}\text{NO}_2$ : C, 69.54%; H, 8.27%; N, 6.76%. Found: C, 69.52%; H, 8.40%; N, 6.75%.

#### 4-Methyl-2-(4,4,5,5-tetramethyl-1,3,2-dioxaborolan-2-yl)phenyl *N,N*-Diethylcarbamate (**4h**)

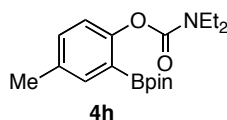

Colorless oil.  $^1\text{H NMR}$  ( $\text{CDCl}_3$ )  $\delta$  1.17–1.30 (m, 6H), 1.30 (s, 12H), 2.32 (s, 3H), 3.37 (q,  $J = 7.2$ , Hz, 2H), 3.50 (q,  $J = 7.2$  Hz, 2H), 6.95 (d,  $J = 8.1$  Hz, 1H), 7.23 (dd,  $J = 8.1$ , 2.4 Hz, 1H), 7.57 (d,  $J = 2.4$  Hz, 1H).  $^{13}\text{C NMR}$  ( $\text{CDCl}_3$ )  $\delta$  13.18, 13.79, 20.37, 24.59, 41.34, 41.66, 83.25, 121.90, 132.71, 134.01, 136.48, 154.07, 154.95. A signal for the carbon directly attached to the boron atom was not observed. **HRMS-ESI** ( $m/z$ ):  $[\text{M}+\text{H}]^+$  calcd for  $\text{C}_{18}\text{H}_{29}\text{BNO}_4$ , 334.21896; found, 334.21924.

#### 4-Methoxy-2-(4,4,5,5-tetramethyl-1,3,2-dioxaborolan-2-yl)phenyl *N,N*-Diethylcarbamate (**4i**)

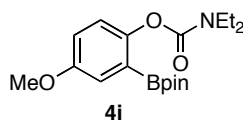

Colorless oil.  $^1\text{H NMR}$  ( $\text{CDCl}_3$ )  $\delta$  1.17–1.30 (m, 6H), 1.30 (s, 12H), 3.37 (q,  $J = 6.9$  Hz, 2H), 3.49 (q,  $J = 6.9$  Hz, 2H), 3.81 (s, 3H), 6.96–6.97 (m, 2H), 7.27 (m, 1H).  $^{13}\text{C NMR}$  ( $\text{CDCl}_3$ )  $\delta$  13.27, 13.87, 24.69, 41.42, 41.78, 55.55, 83.47, 118.23, 119.75, 123.19, 149.90, 155.24, 156.44. A signal for the carbon directly attached to the boron atom was not observed. **HRMS-ESI** ( $m/z$ ):  $[\text{M}+\text{Na}]^+$  calcd for  $\text{C}_{18}\text{H}_{28}\text{BNO}_5\text{Na}$ , 372.19527; found, 372.19552.

#### 4-Trifluoromethylphenyl *N,N*-Diethylcarbamate (**3j**)

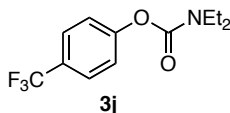

Colorless oil.  $^1\text{H NMR}$  ( $\text{CDCl}_3$ )  $\delta$  1.19–1.29 (m, 6H), 3.36–3.49 (m, 4H), 7.25 (d,  $J = 8.4$  Hz, 2H), 7.63 (d,  $J = 8.4$  Hz, 2H).  $^{13}\text{C NMR}$  ( $\text{CDCl}_3$ )  $\delta$  12.72, 13.63, 41.62, 42.01, 121.94, 123.94 (q,  $J = 272.0$  Hz), 126.24 (q,  $J = 4.0$  Hz), 126.89 (q,  $J = 32.6$  Hz), 153.25, 154.14 (d,  $J = 1.1$  Hz). **Anal.** Calcd for  $\text{C}_{12}\text{H}_9\text{F}_3\text{NO}_2$ : C, 55.17%; H, 5.40%; N, 5.36%. Found: C, 55.13%; H, 5.36%; N, 5.36%.

#### 2-(4,4,5,5-Tetramethyl-1,3,2-dioxaborolan-2-yl)-4-trifluoromethylphenyl *N,N*-Diethylcarbamate (**4j**)

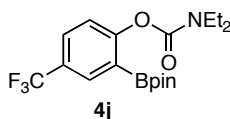

White solid.  $^1\text{H NMR}$  ( $\text{CDCl}_3$ )  $\delta$  1.18–1.32 (m, 6H), 1.30 (s, 12H), 3.39 (q,  $J = 7.2$  Hz, 2H), 3.51 (q,  $J = 7.2$  Hz, 2H), 7.19 (d,  $J = 8.4$  Hz, 1H), 7.68 (dd,  $J = 8.4, 2.1$  Hz, 1H), 8.04 (d,  $J = 2.1$  Hz, 1H).  $^{13}\text{C NMR}$  ( $\text{CDCl}_3$ )  $\delta$  13.18, 13.84, 24.70, 41.59, 41.95, 83.93, 122.70, 124.20 (q,  $J = 272.6$  Hz), 127.06 (q,  $J = 32.6$  Hz), 129.09 (q,  $J = 3.4$  Hz), 133.38 (q,  $J = 4.0$  Hz), 154.24, 158.76 (q,  $J = 1.7$  Hz). A signal for the carbon directly attached to the boron atom was not observed. **Anal.** Calcd for  $\text{C}_{18}\text{H}_{25}\text{F}_3\text{NO}_4$ : C, 55.83%; H, 6.51%; N, 3.62%. Found: C, 55.47%; H, 6.43%; N, 3.57%. m.p. 63.5–64.5 °C. The regioselectivity was assigned on the basis of the  $J_{\text{C-F}}$  values in the  $^{13}\text{C NMR}$  spectrum.

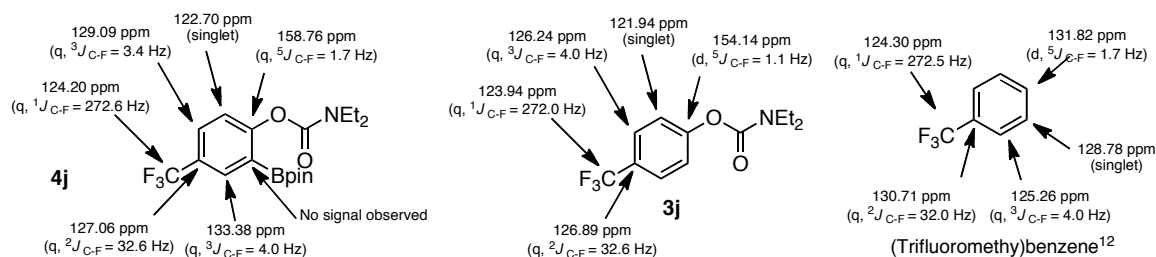

#### (1,1'-Biphenyl)-4-yl *N,N*-Diethylcarbamate (**3k**)

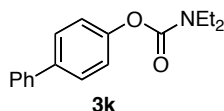

Colorless oil.  $^1\text{H NMR}$  ( $\text{CDCl}_3$ )  $\delta$  1.20–1.30 (m, 6H), 3.40–3.48 (m, 4H), 7.26 (dm,  $J = 8.4$  Hz, 2H), 7.34 (tt,  $J = 7.2, 1.5$  Hz, 1H), 7.44 (tm,  $J = 7.2$  Hz, 2H), 7.55–7.59 (m, 4H).  $^{13}\text{C NMR}$  ( $\text{CDCl}_3$ )  $\delta$  13.16, 14.01, 41.72, 42.08, 121.99, 127.05, 127.12, 127.91, 128.71, 138.15, 140.60, 151.02, 154.22. **Anal.** Calcd for  $\text{C}_{17}\text{H}_{19}\text{NO}_2$ : C, 75.81%; H, 7.11%; N, 5.20%. Found: C, 75.63; H, 7.15%; N, 5.22%.

#### 4-Phenyl-2-(4,4,5,5-tetramethyl-1,3,2-dioxaborolan-2-yl)phenyl *N,N*-Diethylcarbamate (**4k**)

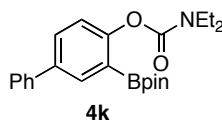

White solid.  $^1\text{H NMR}$  ( $\text{CDCl}_3$ )  $\delta$  1.19–1.32 (m, 6H), 1.32 (s, 12H), 3.40 (q,  $J = 7.2$  Hz, 2H), 3.53 (q,  $J = 7.2$  Hz, 2H), 7.15 (d,  $J = 8.4$  Hz, 1H), 7.32 (tt,  $J = 7.5, 1.8$  Hz, 1H), 7.42 (t,  $J = 7.5$  Hz, 2H), 7.60 (dd,  $J = 7.5, 1.8$  Hz, 2H), 7.64 (dd,  $J = 8.4, 2.4$  Hz, 1H), 7.99 (d,  $J = 2.4$  Hz, 1H).  $^{13}\text{C NMR}$  ( $\text{CDCl}_3$ )  $\delta$  13.20, 13.82, 24.64, 41.44, 41.77, 83.41, 122.51, 126.99, 127.14, 128.58, 130.78, 134.94, 137.78, 140.63, 154.80, 155.73. A signal for the carbon directly attached to the boron atom was not observed. **Anal.** Calcd for  $\text{C}_{23}\text{H}_{30}\text{BNO}_4$ : C, 69.88%; H, 7.65%; N, 3.54%. Found: C, 69.76; H, 7.75%; N, 3.55%. **m.p.** 154.7–156.0 °C. The synthesis of known compound [1,1':3',1''-terphenyl]-4'-ol<sup>14</sup> from **4k** by Suzuki–Miyaura coupling followed by deprotection of the carbamate moiety confirmed the assignment for **4k**.

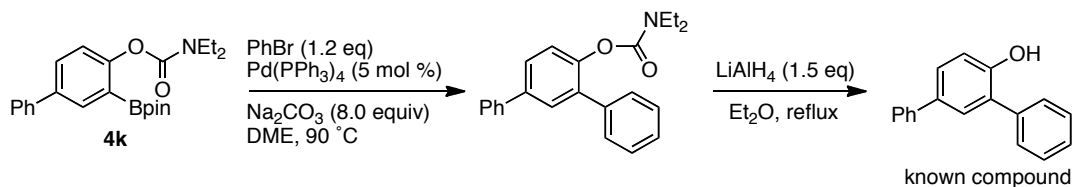

#### 4-Chloro-2-(4,4,5,5-tetramethyl-1,3,2-dioxaborolan-2-yl)phenyl *N,N*-Diethylcarbamate (**4l**)

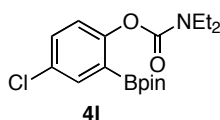

Colorless oil.  $^1\text{H NMR}$  ( $\text{CDCl}_3$ )  $\delta$  1.17–1.36 (m, 6H), 1.30 (s, 12H), 3.37 (q,  $J = 7.5$  Hz, 2H), 3.49 (q,  $J = 7.2$  Hz, 2H), 7.01 (d,  $J = 8.4$  Hz, 1H), 7.38 (dd,  $J = 8.4, 2.7$  Hz, 1H), 7.73 (d,  $J = 2.7$  Hz, 1H).  $^{13}\text{C NMR}$  ( $\text{CDCl}_3$ )  $\delta$  13.26, 13.89, 24.74, 41.54, 41.92, 83.82, 123.77, 130.47, 131.98, 135.76, 154.62, 154.69. A signal for the carbon directly attached to the boron atom was not observed. **HRMS–ESI** ( $m/z$ ):  $[\text{M}+\text{H}]^+$  calcd for  $\text{C}_{17}\text{H}_{26}\text{BClNO}_4$ , 354.16434; found, 354.16429.

#### 5-Bromo-2-(4,4,5,5-tetramethyl-1,3,2-dioxaborolan-2-yl)phenyl *N,N*-Diethylcarbamate (**4m**)

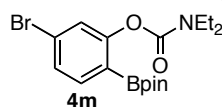

White solid.  $^1\text{H NMR}$  ( $\text{CDCl}_3$ )  $\delta$  1.17–1.33 (m, 6H), 1.29 (s, 12H), 3.37 (q,  $J = 7.2$ , Hz, 2H), 3.48 (q,  $J = 7.2$  Hz, 2H), 7.27 (d,  $J = 1.8$  Hz, 1H), 7.34 (dd,  $J = 8.1, 1.8$  Hz, 1H), 7.63 (d,  $J = 8.1$  Hz, 1H).  $^{13}\text{C NMR}$  ( $\text{CDCl}_3$ )  $\delta$  13.22, 13.84, 24.69, 41.55, 41.93, 83.64, 125.65, 125.74, 128.07, 137.19, 154.36, 156.72. A signal for the carbon directly attached to the boron atom was not observed. **Anal.** Calcd for  $\text{C}_{17}\text{H}_{25}\text{BBrNO}_4$ : C, 51.29%; H, 6.33%; N, 3.52%. Found: C, 50.97%; H, 6.28%; N, 3.43%. m.p. 84.5–85.4 °C.

#### 4-(Methoxycarbonyl)phenyl *N,N*-Diethylcarbamate (3n)

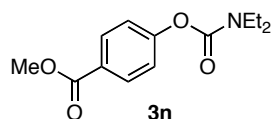

Colorless oil.  $^1\text{H NMR}$  ( $\text{CDCl}_3$ )  $\delta$  1.19–1.28 (m, 6H), 3.36–3.48 (m, 4H), 3.91 (s, 3H), 7.21 (dm,  $J = 8.7$  Hz, 2H), 8.23 (dm,  $J = 8.7$  Hz, 2H).  $^{13}\text{C NMR}$  ( $\text{CDCl}_3$ )  $\delta$  12.79, 13.71, 41.54, 41.88, 51.55, 121.26, 126.46, 130.62, 153.08, 155.10, 166.11. **HRMS-ESI** ( $m/z$ ):  $[\text{M}+\text{Na}]^+$  calcd for  $\text{C}_{13}\text{H}_{17}\text{NO}_4\text{Na}$ , 274.10498; found, 274.10497.

#### 4-(Methoxycarbonyl)-2-(4,4,5,5-tetramethyl-1,3,2-dioxaborolan-2-yl)phenyl

*N,N*-Diethylcarbamate (4n) and 4-(Methoxycarbonyl)-3-(4,4,5,5-tetramethyl-1,3,2-dioxaborolan-2-yl)phenyl *N,N*-Diethylcarbamate (4n')

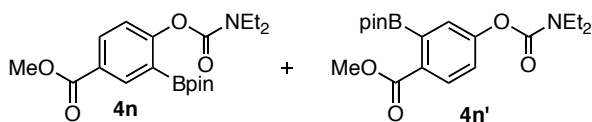

Colorless oil.  $^1\text{H NMR}$  ( $\text{CDCl}_3$ ) **4n**;  $\delta$  1.18–1.32 (m, 6H), 1.32 (s, 12H), 3.39 (q,  $J = 7.2$  Hz, 2H), 3.51 (q,  $J = 7.2$  Hz, 2H), 3.91 (s, 3H), 7.15 (d,  $J = 8.4$  Hz, 1H), 8.12 (dd,  $J = 8.4, 2.4$  Hz, 1H), 8.45 (d,  $J = 2.4$  Hz, 1H). **4n'**;  $\delta$  3.90 (s, 3H), 7.21–7.23 (m, 2H), 7.95 (d,  $J = 9.3$  Hz, 1H) (only observed peaks).  $^{13}\text{C NMR}$  ( $\text{CDCl}_3$ ) **4n+4n'**;  $\delta$  13.15, 13.20, 13.86, 14.07, 41.56, 41.84, 41.90, 42.15, 83.76, 84.08, 122.15, 122.34, 125.02, 126.67, 129.96, 130.36, 133.65, 137.94, 154.23, 154.57, 159.87, 166.73 (only observed peaks). **HRMS-ESI** ( $m/z$ ):  $[\text{M}+\text{Na}]^+$  calcd for  $\text{C}_{19}\text{H}_{28}\text{NO}_6\text{BNa}$ , 400.19014; found, 400.19046. The position of the boron atom was determined by comparison of the  $^1\text{H NMR}$  chemical shifts with those of the isomer **4n'**: the aromatic proton of **4n** at C3 position was observed at a significantly lower magnetic field than the aromatic proton of **4n'** at C2 position, which indicates that the **4n** is a boronated at the ortho position of the carbamate moiety.

#### 3-(2-Methoxy-2-oxoethyl)phenyl *N,N*-Diethylcarbamate (3o)

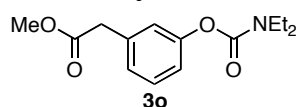

Colorless oil.  $^1\text{H NMR}$  ( $\text{CDCl}_3$ )  $\delta$  1.18–1.27 (m, 6H), 3.37–3.45 (m, 4H), 3.63 (s, 2H), 3.70 (s, 3H), 7.04–7.13 (m, 3H), 7.31 (t,  $J = 7.5$  Hz, 1H).  $^{13}\text{C NMR}$  ( $\text{CDCl}_3$ )  $\delta$  13.13, 13.98, 40.68, 41.69, 42.03, 51.87, 120.54, 122.63, 125.96, 129.22, 135.15, 151.62, 154.10, 171.71. **Anal.** Calcd for  $\text{C}_{14}\text{H}_{19}\text{NO}_4$ : C, 63.38%; H, 7.22%; N, 5.28%. Found: C, 63.02%; H, 7.21%; N, 5.24%.

**5-(2-Methoxy-2-oxoethyl)-2-(4,4,5,5-tetramethyl-1,3,2-dioxaborolan-2-yl)phenyl *N,N*-Diethylcarbamate (4o)**

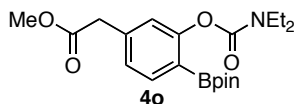

Colorless oil.  $^1\text{H NMR}$  ( $\text{CDCl}_3$ )  $\delta$  1.17–1.35 (m, 6H), 1.29 (s, 12H), 3.38 (q,  $J = 7.2$  Hz, 2H), 3.50 (q,  $J = 7.2$  Hz, 2H), 3.62 (s, 2H), 3.67 (s, 3H), 7.02 (s, 1H), 7.12 (d,  $J = 8.1$  Hz, 1H), 7.73 (d,  $J = 8.1$  Hz, 1H).  $^{13}\text{C NMR}$  ( $\text{CDCl}_3$ )  $\delta$  13.28, 13.87, 24.70, 40.93, 41.51, 41.83, 51.99, 83.42, 123.16, 125.80, 136.44, 138.31, 154.78, 156.41, 171.56. **Anal.** Calcd for  $\text{C}_{20}\text{H}_{30}\text{BNO}_6$ : C, 61.39%; H, 7.73%; N, 3.58%. Found: C, 61.06%; H, 7.65%; N, 3.59%.

**3-[(*tert*-Butoxycarbonyloxy)methyl]phenyl *N,N*-Diethylcarbamate (3p)**

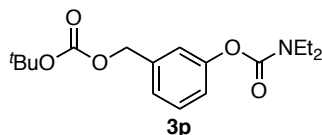

Colorless oil.  $^1\text{H NMR}$  ( $\text{CDCl}_3$ )  $\delta$  1.18–1.29 (m, 6H), 1.49 (s, 9H), 3.35–3.47 (m, 4H), 5.08 (s, 2H), 7.10 (dm,  $J = 7.8$  Hz, 1H), 7.15 (s, 1H), 7.20 (d,  $J = 7.8$  Hz, 1H), 7.35 (t,  $J = 7.8$  Hz, 1H).  $^{13}\text{C NMR}$  ( $\text{CDCl}_3$ )  $\delta$  13.08, 13.94, 27.48, 41.65, 42.00, 67.91, 82.12, 121.39, 121.64, 124.63, 129.24, 136.93, 151.60, 153.31, 153.98. **Anal.** Calcd for  $\text{C}_{17}\text{H}_{25}\text{NO}_5$ : C, 63.14%; H, 7.79%; N, 4.33%. Found: C, 62.84%; H, 7.80%; N, 4.37%.

**5-[(*tert*-Butoxycarbonyloxy)methyl]-2-(4,4,5,5-tetramethyl-1,3,2-dioxaborolan-2-yl)phenyl *N,N*-Diethylcarbamate (4p)**

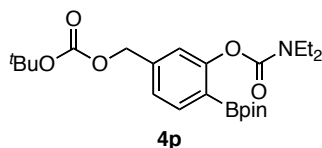

Colorless oil.  $^1\text{H NMR}$  ( $\text{CDCl}_3$ )  $\delta$  1.17–1.32 (m, 6H), 1.30 (s, 12H), 1.49 (s, 9H), 3.37 (q,  $J = 7.2$  Hz, 2H), 3.50 (q,  $J = 6.9$  Hz, 2H), 5.08 (s, 2H), 7.09 (d,  $J = 1.2$  Hz, 1H), 7.19 (dd,  $J = 7.8, 1.2$  Hz, 1H), 7.76 (d,  $J = 7.8$  Hz, 1H).  $^{13}\text{C NMR}$  ( $\text{CDCl}_3$ )  $\delta$  13.24, 13.85, 24.69, 27.60, 41.50, 41.83, 67.81, 82.28, 83.47, 121.57, 124.08, 136.42, 140.07, 153.39, 154.73, 156.40. A signal for the carbon directly attached to the boron atom was not observed. **HRMS-ESI** ( $m/z$ ):  $[\text{M}+\text{Na}]^+$  calcd for  $\text{C}_{23}\text{H}_{36}\text{BO}_7\text{NNa}$ , 472.24770; found, 472.24743.

### 3-(2-Methyl-1,3-dioxan-2-yl)phenyl *N,N*-Diethylcarbamate (3q)

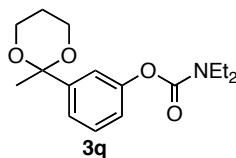

Colorless oil.  $^1\text{H}$  NMR ( $\text{CDCl}_3$ )  $\delta$  1.19–1.29 (m, 7H), 1.52 (s, 3H), 2.12 (m, 1H), 3.37–3.47 (m, 4H), 3.79–3.87 (m, 4H), 7.09 (ddd,  $J = 7.8, 2.4, 1.5$  Hz, 1H), 7.18 (t,  $J = 1.5$  Hz, 1H), 7.27 (m, 1H), 7.39 (t,  $J = 7.8$  Hz, 1H).  $^{13}\text{C}$  NMR ( $\text{CDCl}_3$ )  $\delta$  13.18, 14.05, 25.14, 32.12, 41.72, 42.06, 61.18, 100.15, 120.38, 121.00, 123.44, 129.49, 142.84, 152.07, 154.18. **Anal.** Calcd for  $\text{C}_{16}\text{H}_{23}\text{NO}_4$ : C, 65.51%; H, 7.90%; N, 4.77%. Found: C, 65.20%; H, 7.94%; N, 4.76%.

### 5-(2-Methyl-1,3-dioxan-2-yl)-2-(4,4,5,5-tetramethyl-1,3,2-dioxaborolan-2-yl)phenyl *N,N*-Diethylcarbamate (4q)

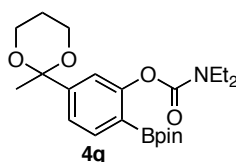

White solid.  $^1\text{H}$  NMR ( $\text{CDCl}_3$ )  $\delta$  1.18–1.34 (m, 7H), 1.31 (s, 12H), 1.49 (s, 3H), 2.11 (m, 1H), 3.39 (q,  $J = 7.2$  Hz, 2H), 3.52 (q,  $J = 7.2$  Hz, 2H), 3.77–3.89 (m, 4H), 7.13 (d,  $J = 1.5$  Hz, 1H), 7.27 (m, 1H), 7.82 (d,  $J = 8.1$  Hz, 1H).  $^{13}\text{C}$  NMR ( $\text{CDCl}_3$ )  $\delta$  13.21, 13.85, 24.66, 25.12, 32.01, 41.43, 41.76, 61.27, 83.42, 100.16, 120.86, 123.19, 136.66, 145.95, 154.74, 156.82. **Anal.** Calcd for  $\text{C}_{22}\text{H}_{34}\text{BNO}_6$ : C, 63.02%; H, 8.17%; N, 3.34%. Found: C, 62.74%; H, 8.30%; N, 3.32%. m.p. 105.5–106.5  $^\circ\text{C}$ .

### 5-Fluoro-2-methylphenyl Diethylcarbamate (3r)

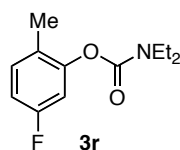

Colorless oil.  $^1\text{H}$  NMR ( $\text{CDCl}_3$ )  $\delta$  1.19–1.29 (m, 6H), 2.17 (s, 3H), 3.36–3.50 (m, 4H), 6.80–6.88 (m, 2H), 7.14 (tm,  $J = 7.2$  Hz, 1H).  $^{13}\text{C}$  NMR ( $\text{CDCl}_3$ )  $\delta$  13.01, 13.89, 15.34, 41.69, 42.07, 109.86 (d,  $J = 24.0$  Hz), 111.88 (d,  $J = 21.2$  Hz), 126.02 (d,  $J = 3.4$  Hz), 131.13 (d,  $J = 9.2$  Hz), 150.42 (d,  $J = 10.9$  Hz), 153.32, 161.03 (d,  $J = 244.5$  Hz). **Anal.** Calcd for  $\text{C}_{12}\text{H}_{16}\text{FNO}_2$ : C, 63.98%; H, 7.16%; N, 6.22%. Found: C, 63.87%; H, 7.18%; N, 6.26%.

### 5-Fluoro-2-methyl-6-(4,4,5,5-tetramethyl-1,3,2-dioxaborolan-2-yl)phenyl *N,N*-Diethylcarbamate (4r)

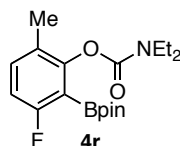

Colorless oil.  $^1\text{H NMR}$  ( $\text{CDCl}_3$ )  $\delta$  1.18–1.35 (m, 6H), 1.33 (s, 12H), 2.15 (s, 3H), 3.39 (q,  $J = 7.2$  Hz, 2H), 3.49 (q,  $J = 7.2$  Hz, 2H), 6.82 (t,  $J = 8.4$  Hz, 1H), 7.21 (m, 1H).  $^{13}\text{C NMR}$  ( $\text{CDCl}_3$ )  $\delta$  13.24, 14.05, 15.72, 24.64, 41.55, 41.93, 83.48, 112.19 (d,  $J = 24.1$  Hz), 126.22 (d,  $J = 4.0$  Hz), 133.67 (d,  $J = 9.7$  Hz), 153.80, 154.22 (d,  $J = 10.9$  Hz), 165.19 (d,  $J = 247.9$  Hz). A signal for the carbon directly attached to the boron atom was not observed. **HRMS-ESI** ( $m/z$ ):  $[\text{M}+\text{H}]^+$  calcd for  $\text{C}_{18}\text{H}_{28}\text{O}_4\text{NBF}$ , 352.20954; found, 352.21046. m.p. 112.6–115.2 °C. The regioselectivity was assigned on the basis of the  $J_{\text{C-F}}$  values in the  $^{13}\text{C NMR}$  spectrum.

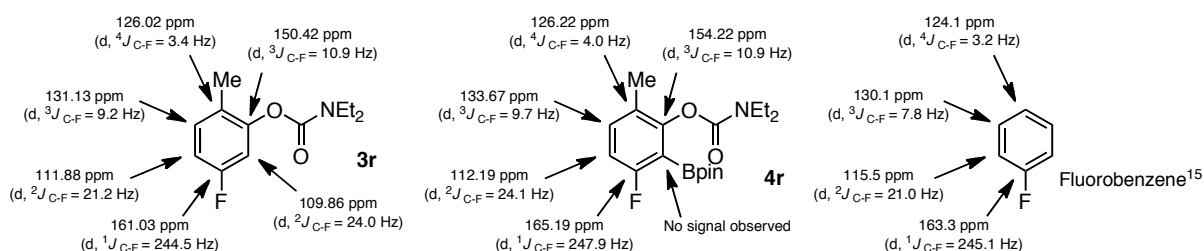

### 3,5-Dimethylphenyl Diethylcarbamate (3s)

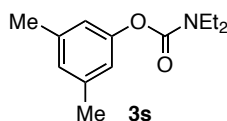

Colorless oil.  $^1\text{H NMR}$  ( $\text{CDCl}_3$ )  $\delta$  1.17–1.26 (m, 6H), 2.30 (s, 6H), 3.35–3.45 (m, 4H), 6.74 (t,  $J = 0.9$  Hz, 2H), 6.82 (d,  $J = 0.9$  Hz, 1H).  $^{13}\text{C NMR}$  ( $\text{CDCl}_3$ )  $\delta$  13.01, 13.83, 20.81, 41.51, 41.84, 119.22, 126.62, 138.75, 151.30, 154.32. **Anal.** Calcd for  $\text{C}_{13}\text{H}_{19}\text{NO}_2$ : C, 70.56%; H, 8.65%; N, 6.33%. Found: C, 70.47%; H, 8.74%; N, 6.26%.

### 3,5-Dimethyl-2-(4,4,5,5-tetramethyl-1,3,2-dioxaborolan-2-yl)phenyl *N,N*-Diethylcarbamate (4s)

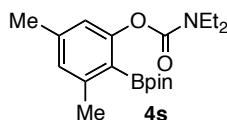

White solid.  $^1\text{H NMR}$  ( $\text{CDCl}_3$ )  $\delta$  1.16–1.35 (m, 6H), 1.31 (s, 12H), 2.27 (s, 3H), 2.44 (s, 3H), 3.37 (q,  $J = 7.2$  Hz, 2H), 3.46 (q,  $J = 7.2$  Hz, 2H), 6.68 (s, 1H), 6.82 (s, 1H).  $^{13}\text{C NMR}$  ( $\text{CDCl}_3$ )  $\delta$  13.27, 13.97, 21.01, 22.16, 24.74, 41.46, 41.73, 83.13, 119.99, 127.98, 141.09, 144.90, 155.02, 156.11. **Anal.** Calcd for  $\text{C}_{19}\text{H}_{30}\text{BNO}_4$ : C, 65.72%; H, 8.71%; N, 4.03%. Found: C, 65.49%; H, 8.79%; N, 3.92%. m.p. 71.5–72.4 °C.



## References

- (1) (a) Hamasaka, G.; Ochida, A.; Hara, K.; Sawamura, M. *Angew. Chem. Int. Ed.* **2007**, *46*, 5381–5383. (b) Hamasaka, G.; Kawamorita, S.; Ochida, A.; Akiyama, R.; Hara, K.; Fukuoka, A.; Asakura, K.; Chun, W. J.; Ohmiya, H.; Sawamura, M. *Organometallics* **2008**, *27*, 6495–6506. (c) Kawamorita, S.; Ohmiya, H.; Hara, K.; Fukuoka, A.; Sawamura, M. *J. Am. Chem. Soc.* **2009**, *131*, 5058–5059.
- (2) Uson, R.; Oro, L. A.; Cabeza, J. A. *Inorg. Synth.* **1985**, *23*, 126.
- (3) Ohe, K.; Yokoi, T.; Miki, K.; Nishino, F.; Uemura, S. *J. Am. Chem. Soc.* **2002**, *124*, 526–527.
- (4) Antelo Miguez, J. M.; Adrio, L. A.; Sousa-Pedrares, A.; Vila, J. M.; Hii, K. K. *J. Org. Chem.* **2007**, *72*, 7771–7774.
- (5) Quasdorf, K. W.; Riener, M.; Petrova, K. V.; Garg, N. K. *J. Am. Chem. Soc.* **2009**, *131*, 17748–17749.
- (6) Ryu, S.; Jackson, J. A.; Thompson, C. M. *J. Org. Chem.* **1991**, *56*, 4999–5002.
- (7) Azzena, U.; Pisano, L.; Pittalis, M. *Appl. Organometal. Chem.* **2008**, *22*, 525–528.
- (8) Bedford, R. B.; Webster, R. L.; Mitchell, C. J. *Org. Biomol. Chem.* **2009**, *7*, 4853–4857.
- (9) Sanz, R.; Castroviejo, M. P.; Fernández, Y.; Fañanás, F. J. *J. Org. Chem.* **2005**, *70*, 6548–6551.
- (10) Sibi, M. P.; Chattopadhyay, S.; Dankwardt, J. W.; Snieckus, V. *J. Am. Chem. Soc.* **1985**, *107*, 6312–6315.
- (11) Zhao, Z.; Snieckus, V. *Org. Lett.* **2005**, *7*, 2523–2526.
- (12) Takahashi, K.; Yoshino, A.; Hosokawa, K.; Muramatsu, H. *Bull. Chem. Soc. Jpn.* **1985**, *58*, 755–756.
- (13) Ishikawa, S.; Manabe, K.; *Org. Lett.* **2007**, *9*, 5593–5595.
- (14) Haga, N.; Takayanagi, H.; *J. Org. Chem.* **1996**, *61*, 735–745.
- (15) Kalinowski, H.-O.; Berger, S.; Braun, S. “Carbon-13 NMR Spectroscopy”, Wiley-Interscience, New York, N. Y., 1972.

Original File:  
 Date Jul 9 09  
 Comment  
 STANDARD IN OBSERVE

ObsNuc <sup>1</sup>H  
 ExMode NON  
 ObsFreq 299.96 MHz  
 ObsSet 1.0 kHz  
 ObsFine 995.0047 Hz  
 Point 16384  
 Frequency (Span) 4500.45 Hz  
 Scan 16  
 AcqTime 3.4983 s  
 PD 1.502 s  
 Pulse 6.0  $\mu$ s  
 Temperature 29.0  $^{\circ}$ C  
 Solvent CDCl<sub>3</sub>  
 Reference 0.0 ppm  
 Broad. Factor 0.1373 Hz  
 RGain 24  
 Printed 2010/May/14 14:57:13  
 Operator

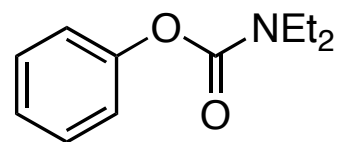

**3aa**

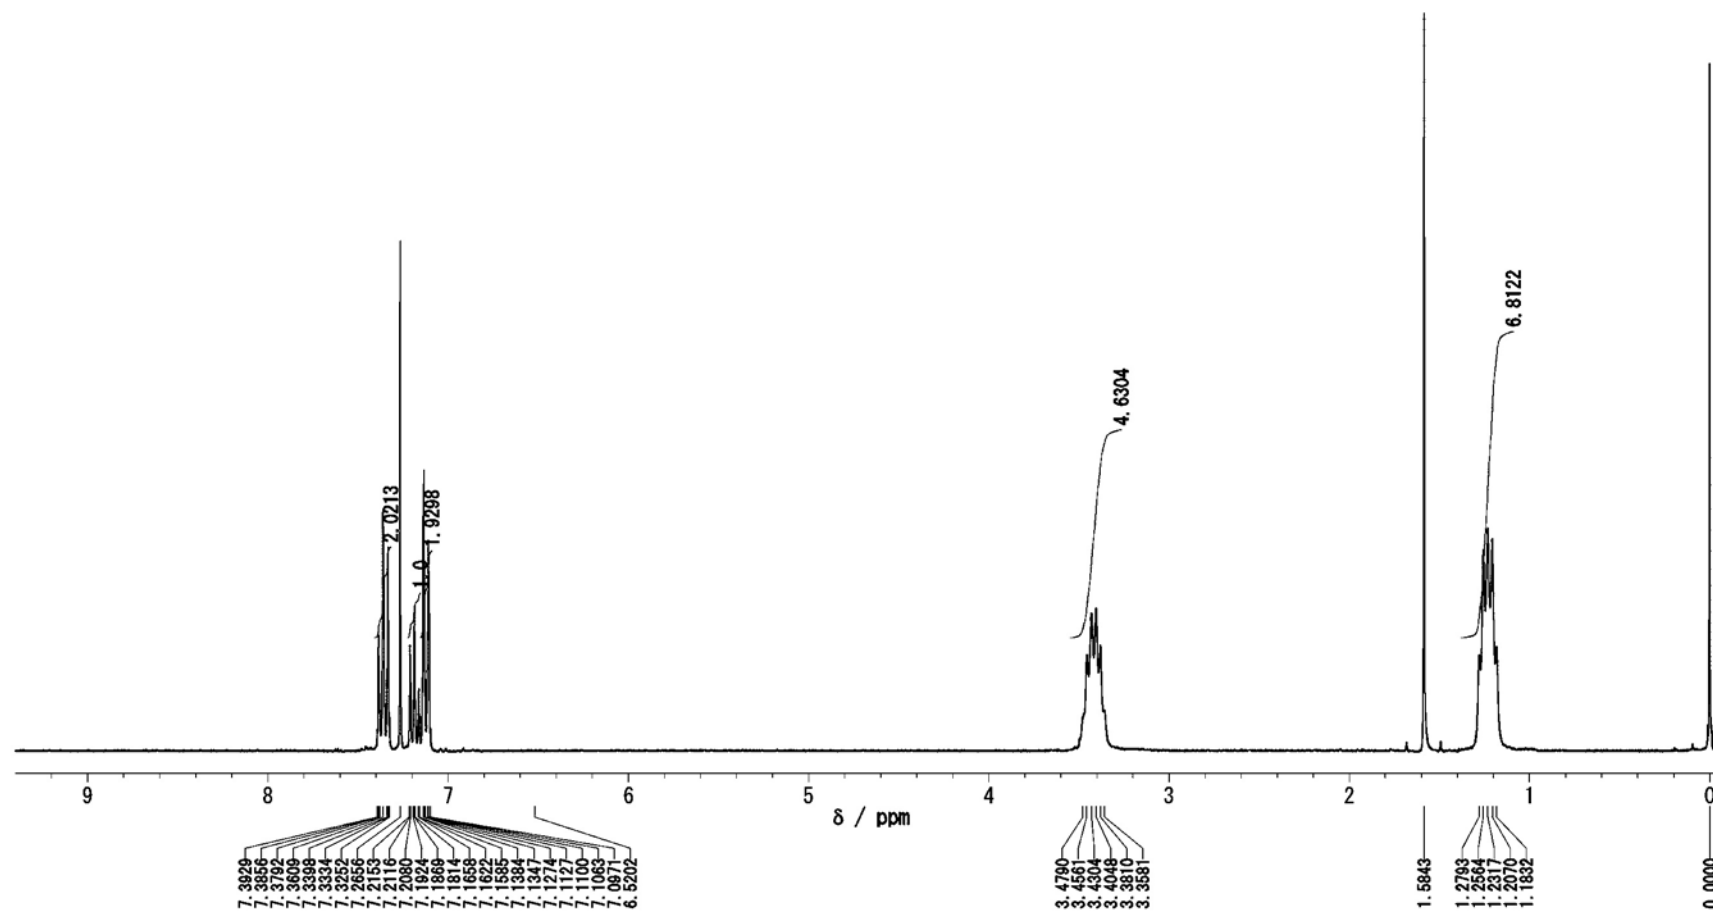

Original File: Mar 4 10  
 Date: Mar 4 10  
 Comment: C13 Standard Observe  
 Stick=none Tune=6.4 Match=0.4

ObsNuc:  $^{13}\text{C}$   
 ExMode: NOX  
 ObsFreq: 75.43 MHz  
 ObsSet: 1.0 kHz  
 ObsFine: 996.3672 Hz  
 Point: 32768  
 Frequency (Span): 18761.73 Hz  
 Scan: 128  
 AcqTime: 1.4992 s  
 PD: 1.501 s  
 Pulse1: 6.0  $\mu\text{s}$   
 Temperature: 29.0  $^{\circ}\text{C}$   
 Solvent:  $\text{CDCl}_3$   
 Reference: 77.0 ppm  
 Broad.Factor: 0.2863 Hz  
 RGain: 30  
 Printed: 2010/May/14 15:18:36  
 Operator:



**3aa**

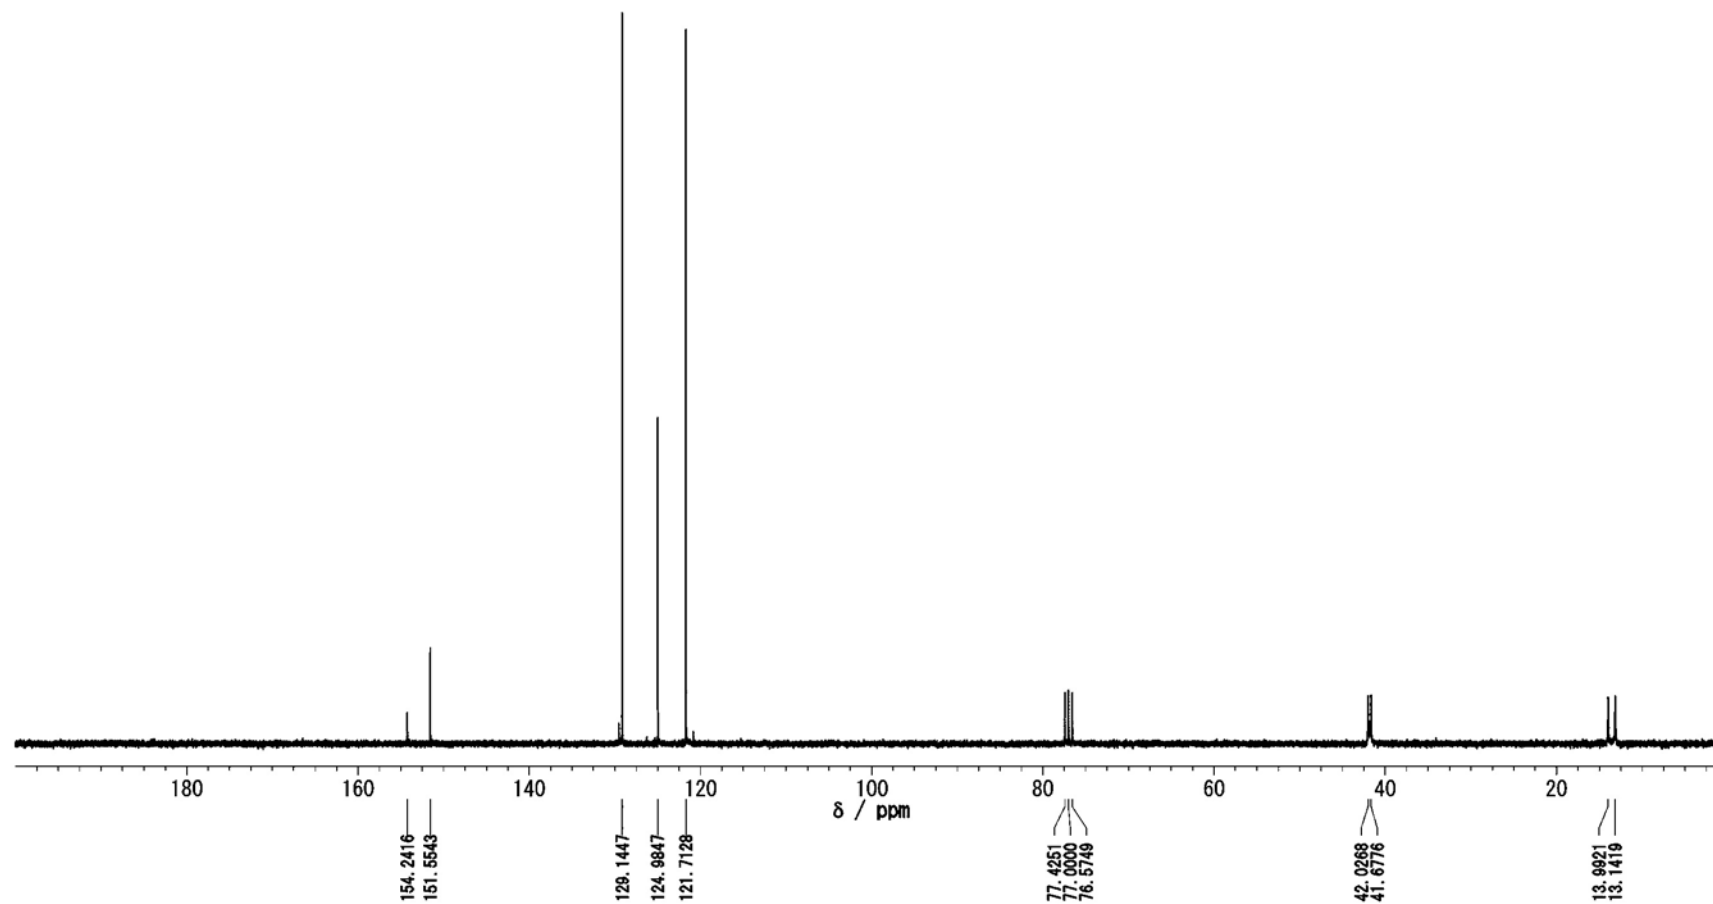

Comment  
 STANDARD 1H OBSERVE  
 ObsNuc <sup>1</sup>H  
 ExMode NOX  
 ObsFreq 299.96 MHz  
 ObsSet 1.0 kHz  
 ObsFine 995.0047 Hz  
 Point 16384  
 Frequency (Span) 4500.45 Hz  
 Scan 16  
 AcqTime 3.4983 s  
 PD 1.502 s  
 Pulse 6.0  $\mu$ s  
 Temperature 29.0  $^{\circ}$ C  
 Solvent CDCl<sub>3</sub>  
 Reference 0.0 ppm  
 Broad.Factor 0.25 Hz  
 RGain 6  
 Printed 2010/May/17 15:13:36  
 Operator

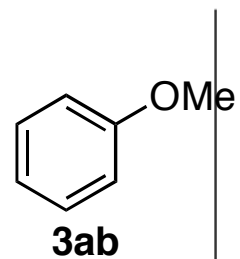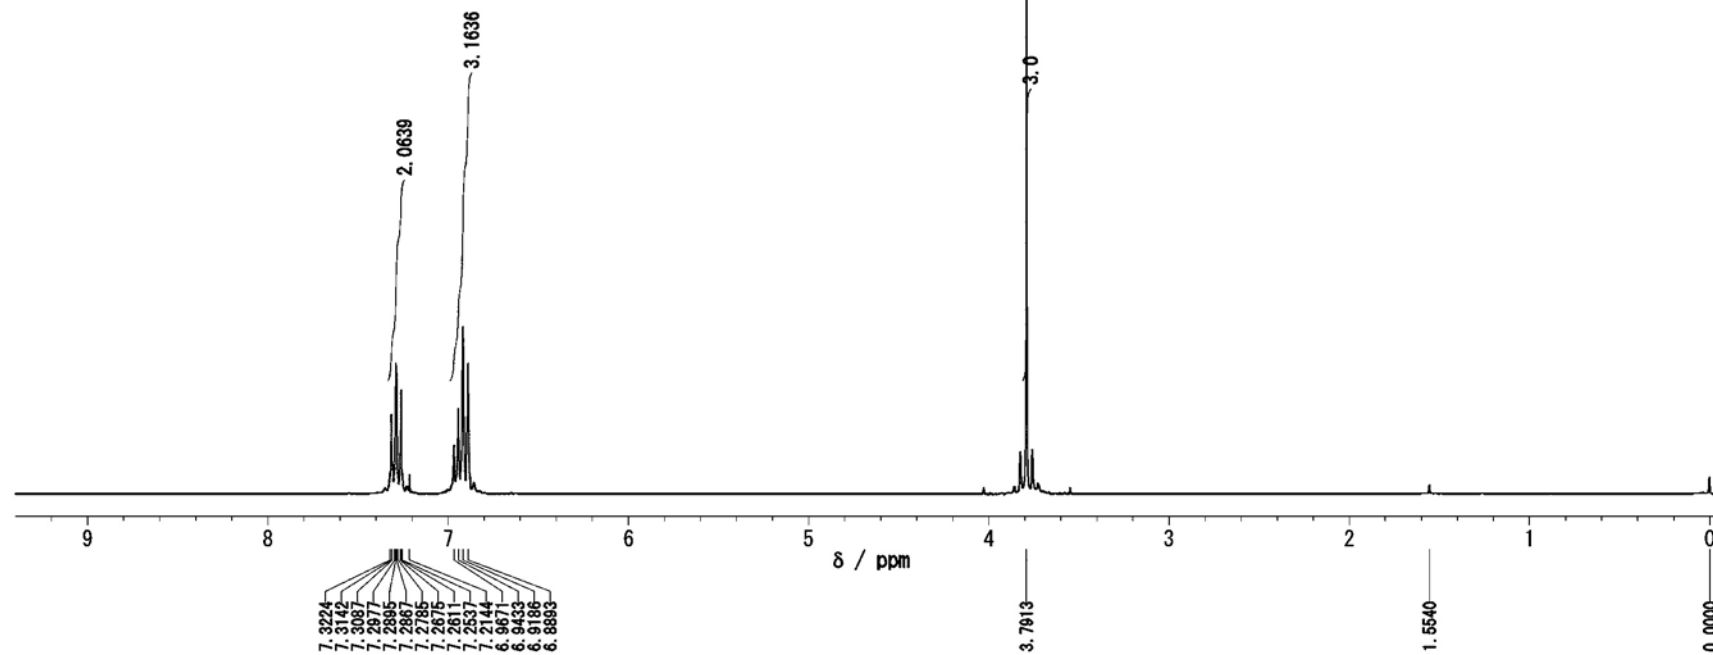

Comment  
 C13 Statdard Observe  
 Stick:none Tune=6.4 Match=0.4  
 ObsNuc  $^{13}\text{C}$   
 ExMode NON  
 ObsFreq 75.43 MHz  
 ObsSet -1.0 kHz  
 ObsFine 996.3672 Hz  
 Point 32768  
 Frequency (Span) 18761.73 Hz  
 Scan 128  
 AcqTime 1.4992 s  
 PD 1.501 s  
 Pulse1 6.0  $\mu\text{s}$   
 Temperature 29.0  $^{\circ}\text{C}$   
 Solvent  $\text{CDCl}_3$   
 Reference 77.0 ppm  
 Broad. Factor 0.25 Hz  
 RGain 30  
 Printed 2010/May/15 16:47:00  
 Operator

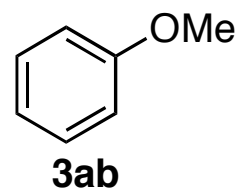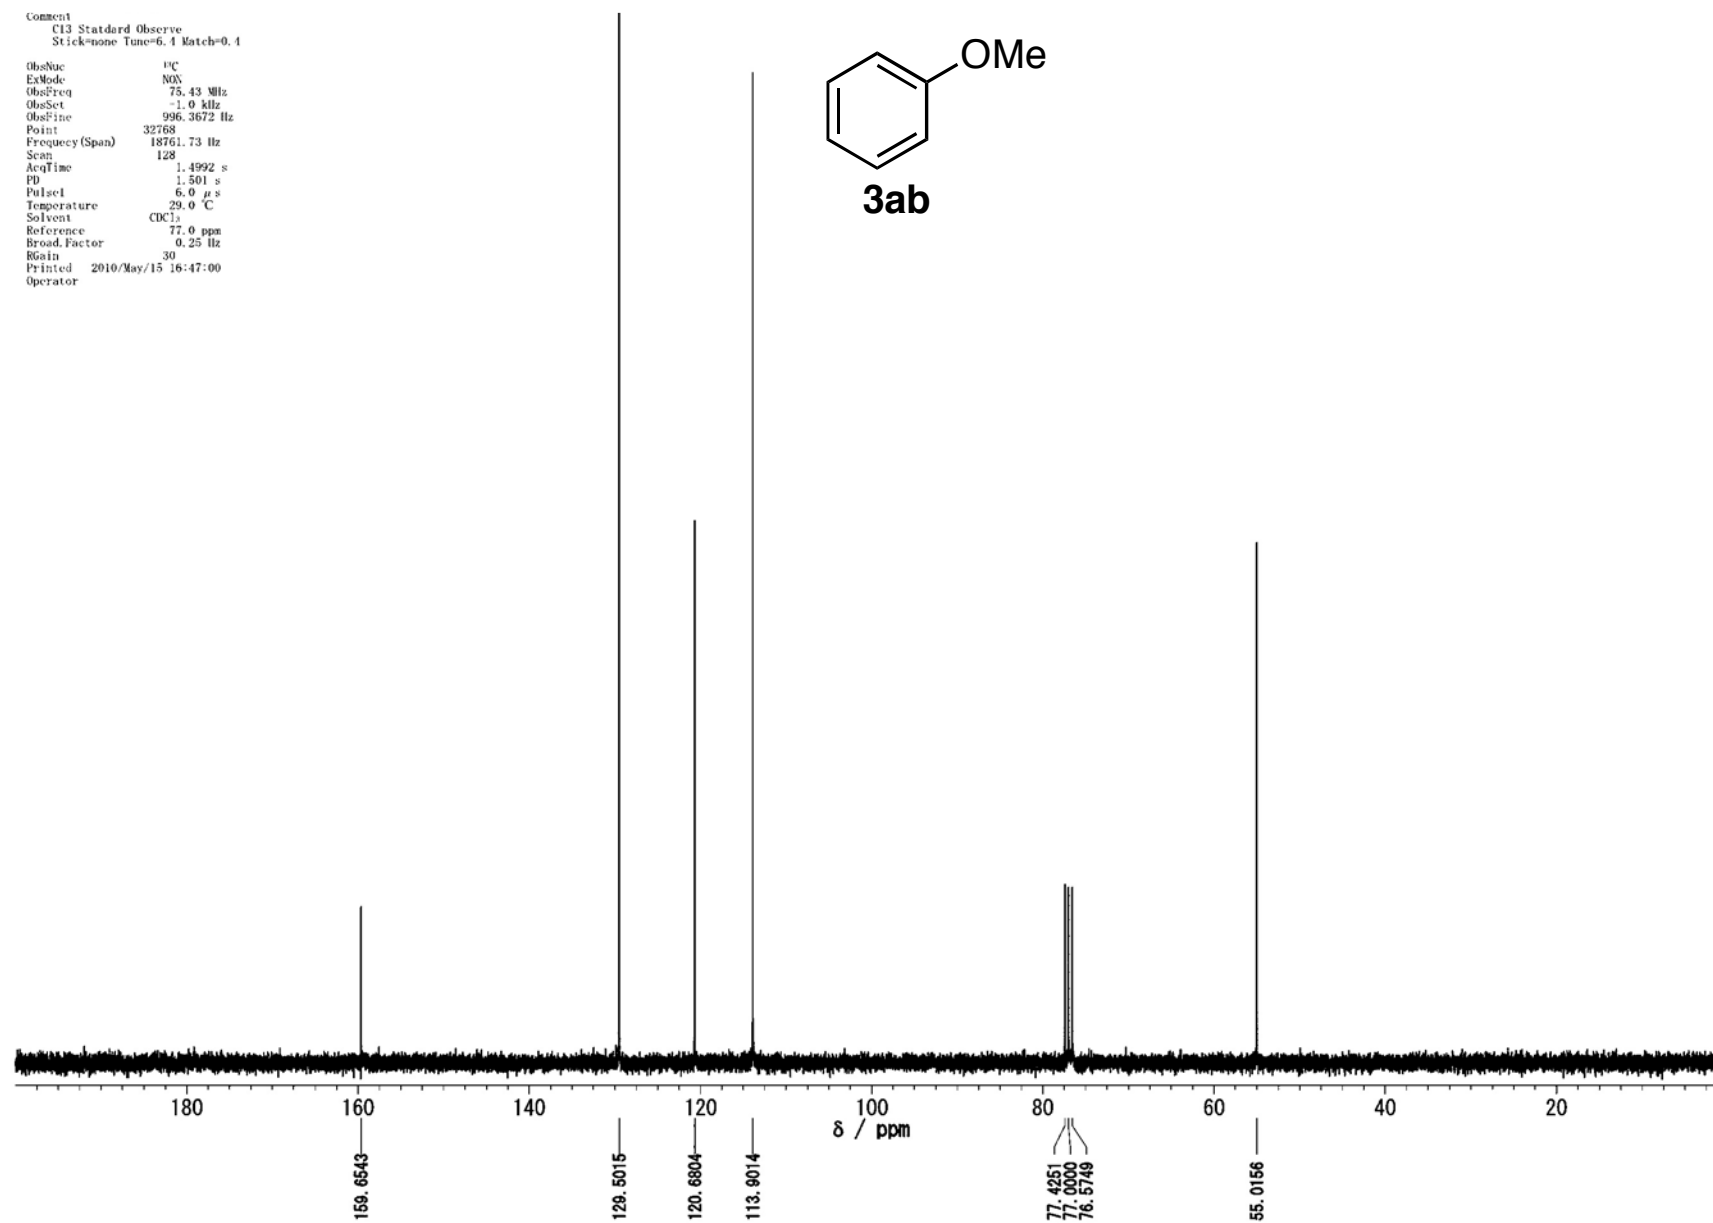

Original File: Mar 19 10  
 Date: Mar 19 10  
 Comment: STANDARD IN OBSERVE  
 ObsNuc: <sup>1</sup>H  
 ExMode: NON  
 ObsFreq: 299.96 MHz  
 ObsSet: 1.0 kHz  
 ObsFine: 995.0047 Hz  
 Point: 16384  
 Frequency (Span): 4500.45 Hz  
 Scan: 16  
 AcqTime: 3.4983 s  
 PD: 1.502 s  
 Pulse1: 6.0  $\mu$ s  
 Temperature: 29.0  $^{\circ}$ C  
 Solvent: CDCl<sub>3</sub>  
 Reference: 0.0 ppm  
 Broad. Factor: 0.1373 Hz  
 RGain: 19  
 Printed: 2010/May/16 14:05:06  
 Operator:

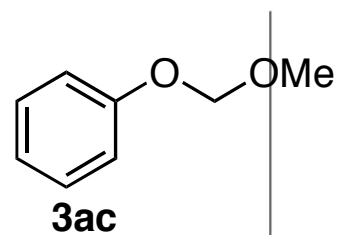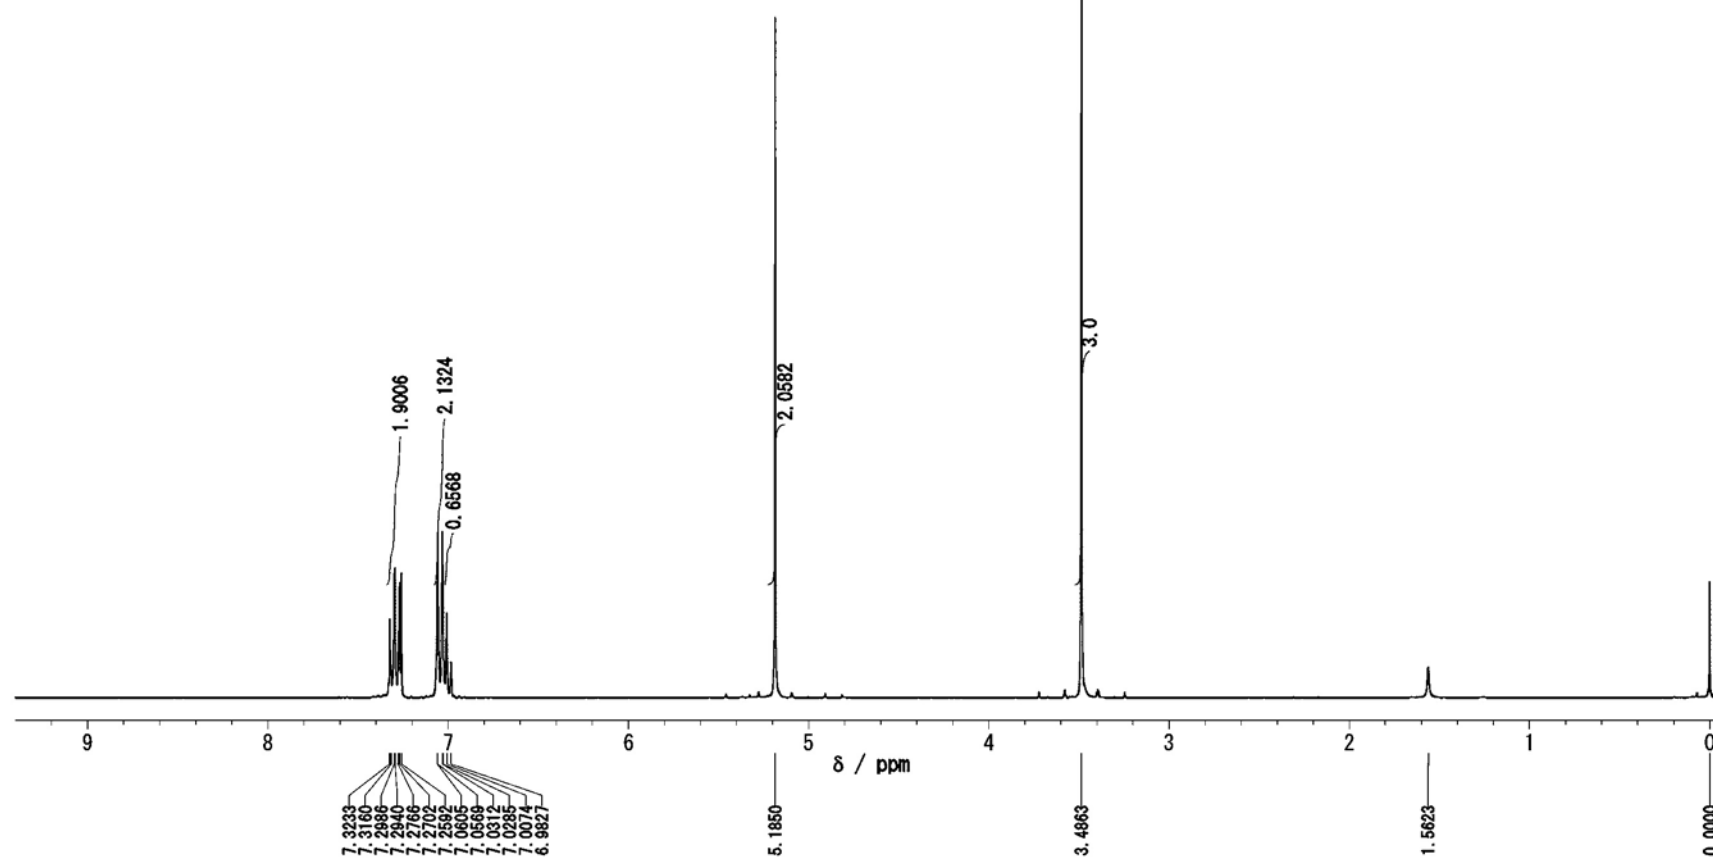

COMMENT  
 C13 Standard Observe  
 Stick:none Tune=6.4 Match=0.4  
 ObsNuc  $^{13}\text{C}$   
 ExMode NON  
 ObsFreq 75.43 MHz  
 ObsSet -1.0 kHz  
 ObsFine 996.3672 Hz  
 Point 32768  
 Frequency (Span) 18761.73 Hz  
 Scan 1408  
 AcqTime 1.4992 s  
 PD 1.501 s  
 Pulse1 6.0  $\mu\text{s}$   
 Temperature 29.0  $^{\circ}\text{C}$   
 Solvent  $\text{CDCl}_3$   
 Reference 77.0 ppm  
 Broad Factor 0.25 Hz  
 RGain 30  
 Printed 2010/May/16 14:02:17  
 Operator

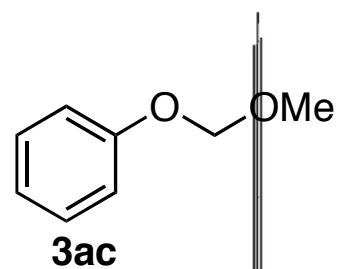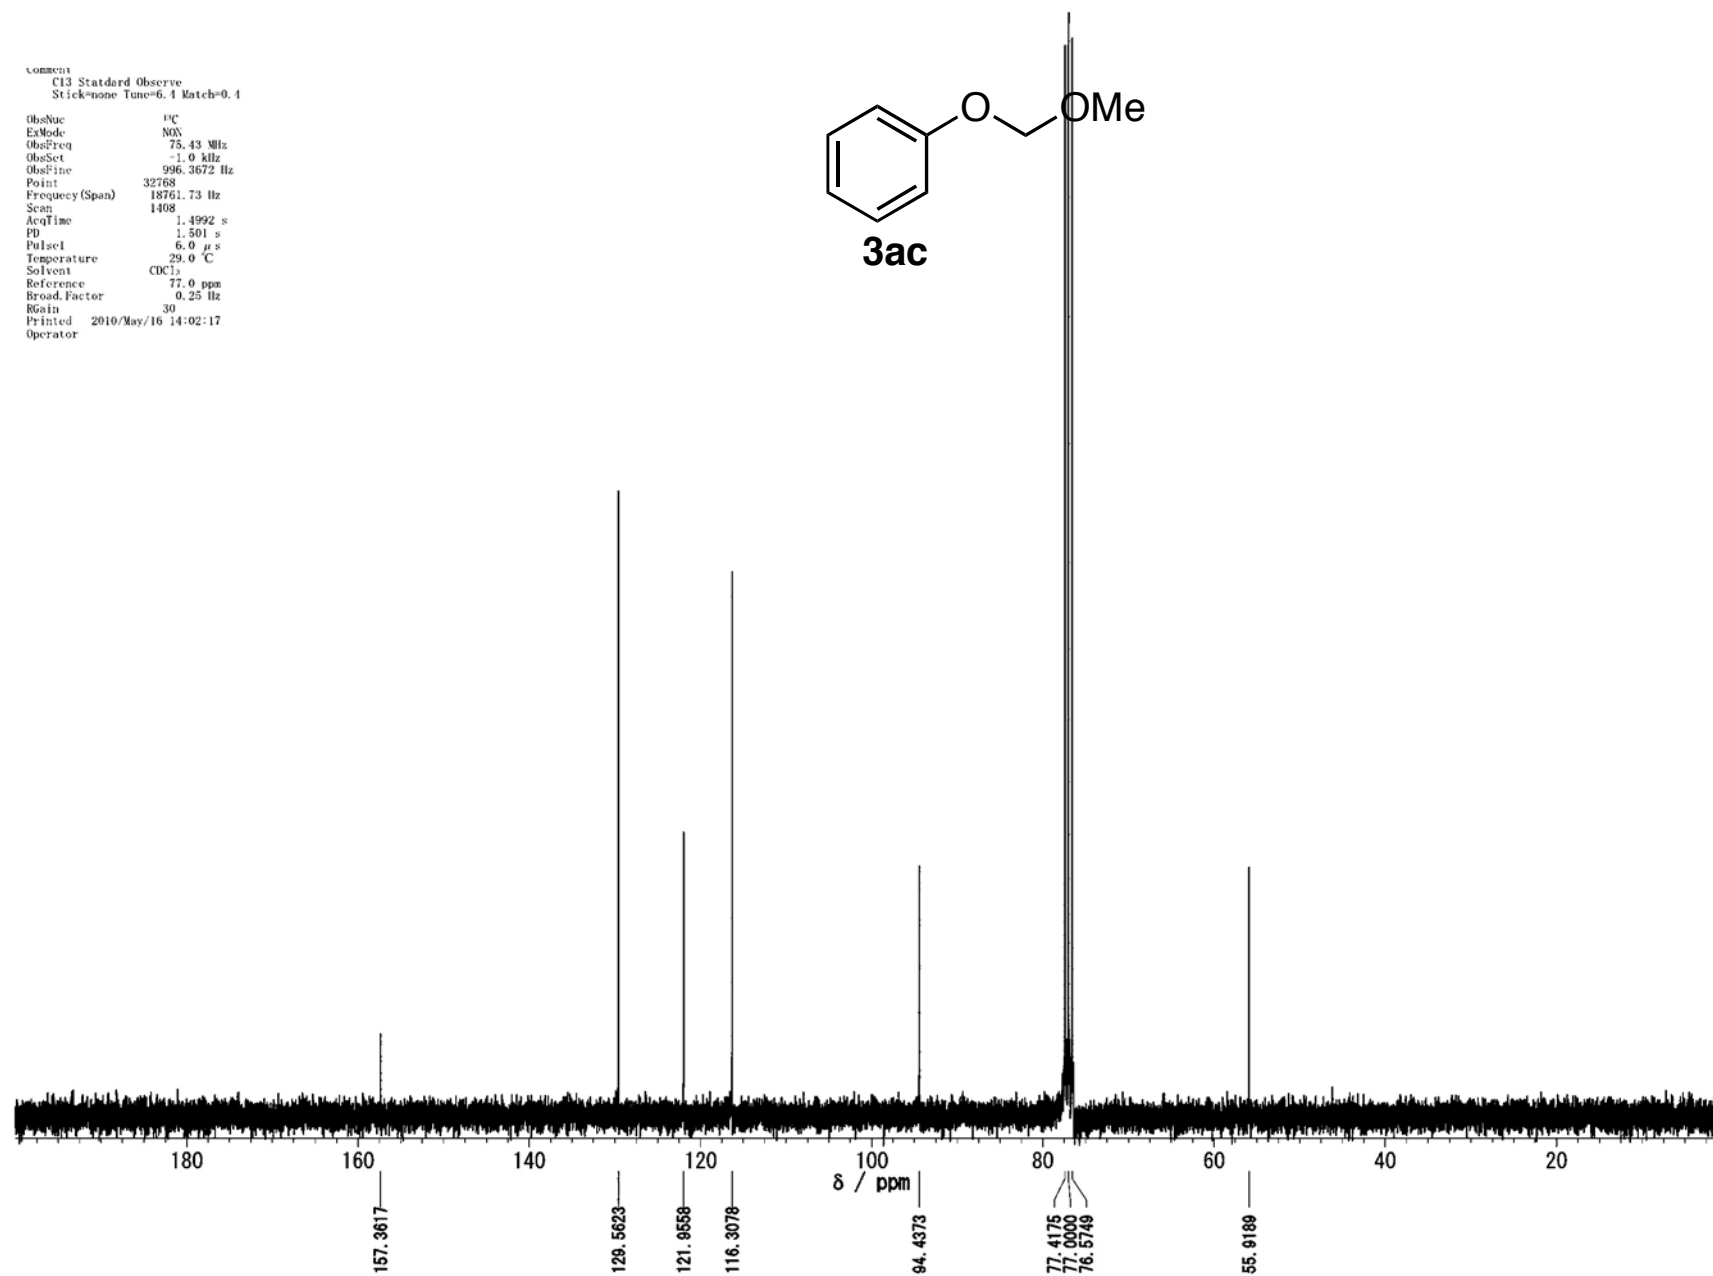

Date May 16 10  
 Comment STANDARD IN OBSERVE  
 ObsNuc <sup>1</sup>H  
 ExMode NON  
 ObsFreq 299.96 MHz  
 ObsSet 1.0 kHz  
 ObsFine 995.0047 Hz  
 Point 16384  
 Frequency (Span) 4500.45 Hz  
 Scan 16  
 AcqTime 3.4983 s  
 PD 1.502 s  
 Pulse 6.0  $\mu$ s  
 Temperature 29.0  $^{\circ}$ C  
 Solvent CDCl<sub>3</sub>  
 Reference 0.0 ppm  
 Broad Factor 0.25 Hz  
 RGain 30  
 Printed 2010/May/16 14:29:23  
 Operator

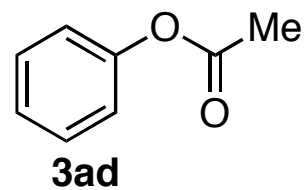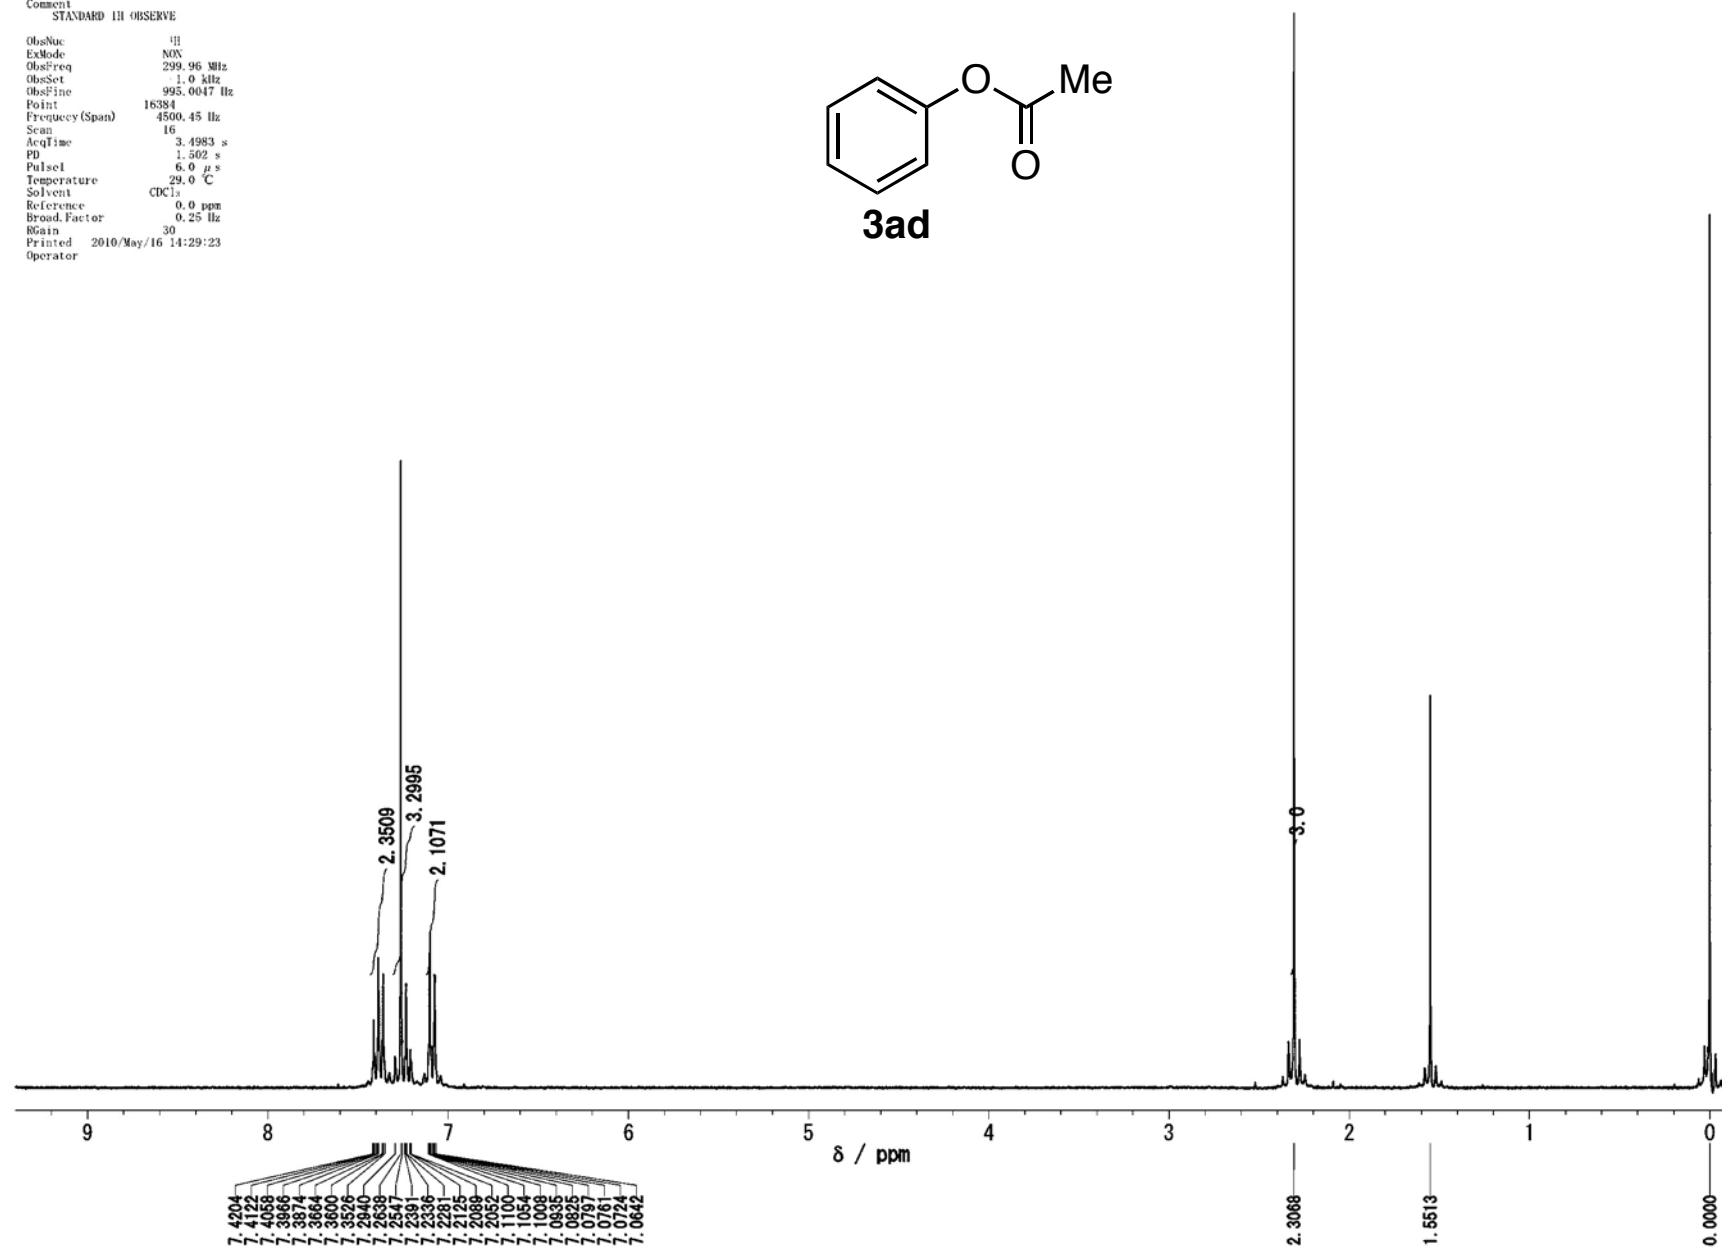



Original File:  
 Date May 15 10  
 Comment  
 C13 Standard Observe  
 Stick=none Tune=6.4 Match=0.4  
 ObsNuc <sup>13</sup>C  
 ExMode NOX  
 ObsFreq 75.43 MHz  
 ObsSet 1.0 kHz  
 ObsFine 996.3672 Hz  
 Point 32768  
 Frequency (Span) 18761.73 Hz  
 Scan 128  
 AcqTime 1.4992 s  
 PD 1.501 s  
 Pulse1 6.0  $\mu$ s  
 Temperature 29.0  $^{\circ}$ C  
 Solvent CDCl<sub>3</sub>  
 Reference 77.0 ppm  
 Broad.Factor 0.2863 Hz  
 RGain 30  
 Printed 2010/May/16 14:11:11  
 Operator

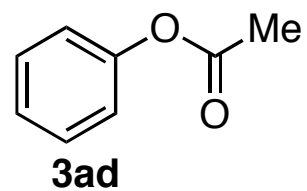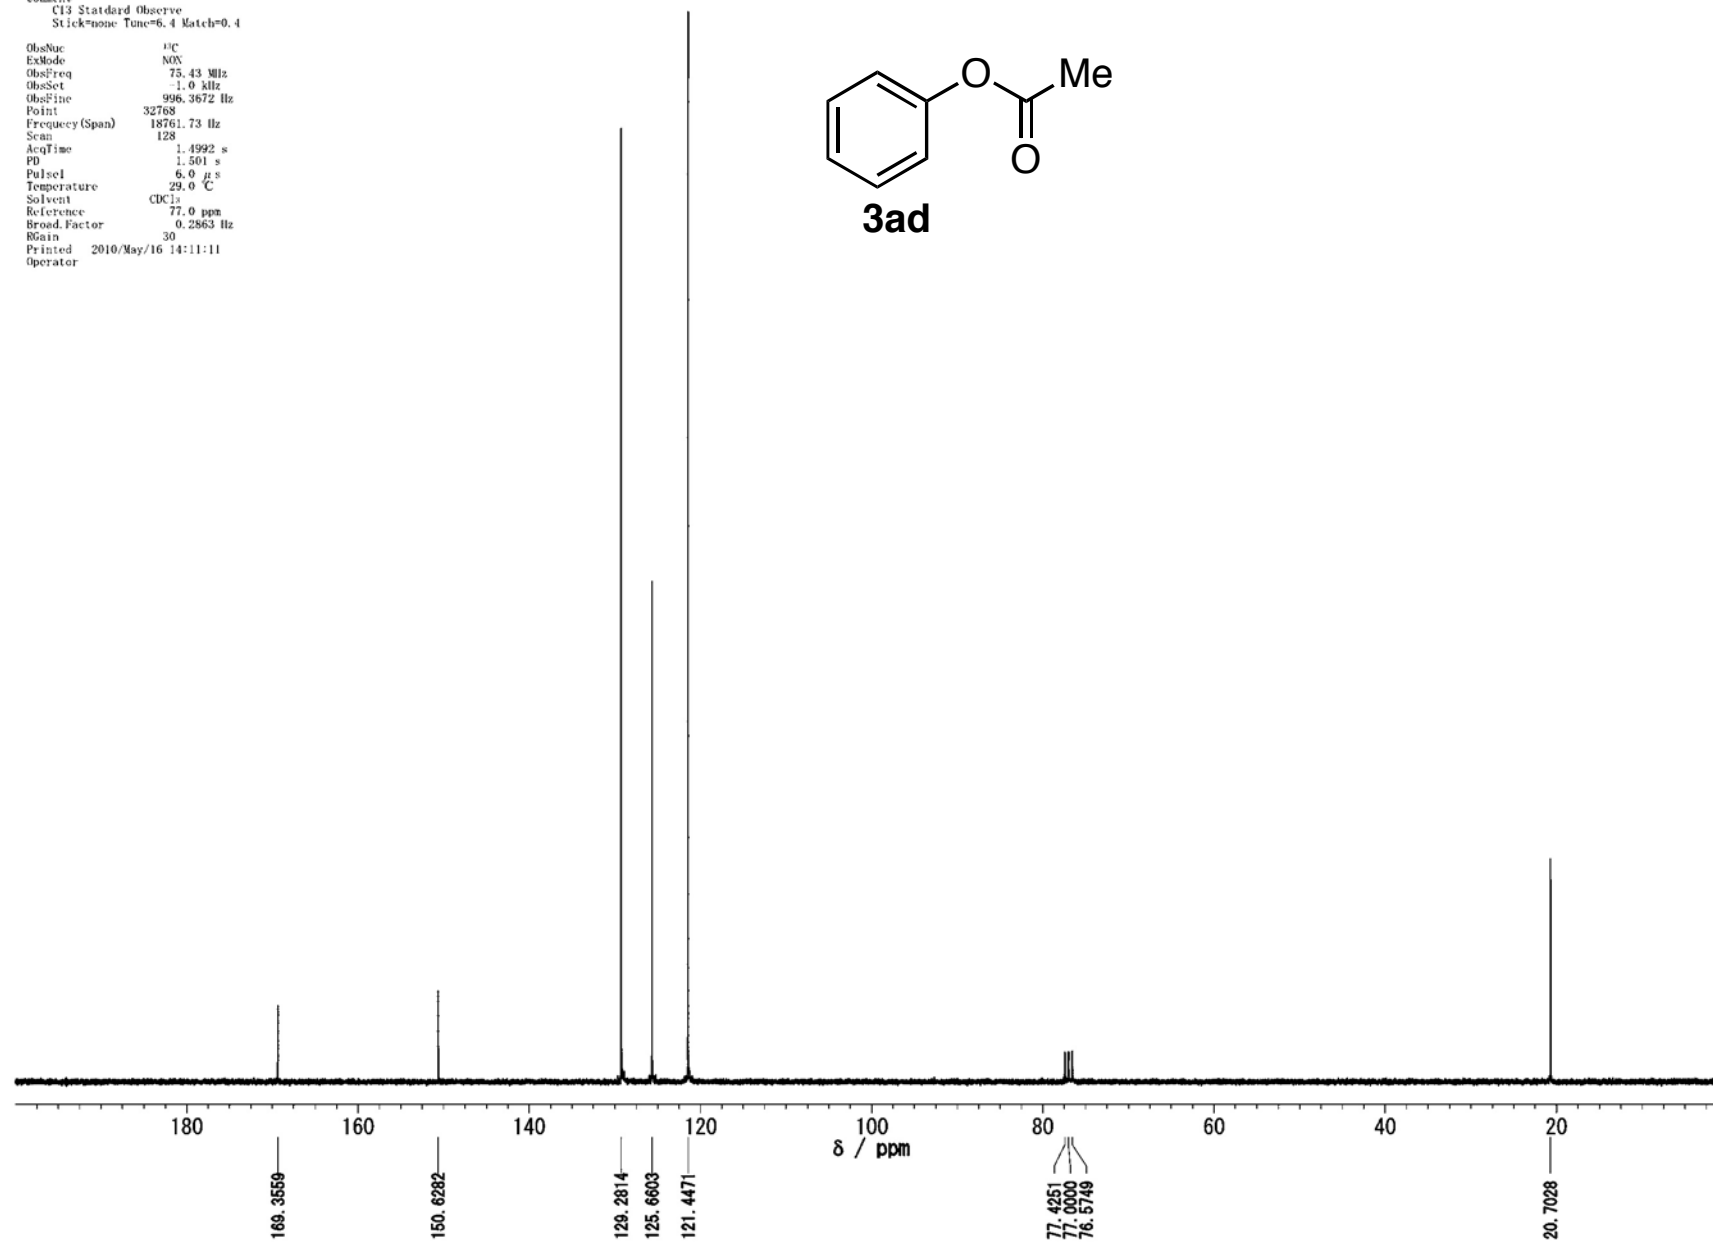

VFid

STANDARD IN OBSERVE

ObsNuc <sup>1</sup>H  
ExMode NON  
ObsFreq 299.96 MHz  
ObsSet 1.0 kHz  
ObsFine 995.0047 Hz  
Point 16384  
Frequency (Span) 4500.45 Hz  
Scan 16  
AcqTime 3.4983 s  
PD 1.502 s  
Pulse 6.0  $\mu$ s  
Temperature 29.0  $^{\circ}$ C  
Solvent CDCl<sub>3</sub>  
Reference 0.0 ppm  
BroadFactor 0.25 Hz  
RGain 5  
Printed 2010/May/16 14:21:50  
Operator

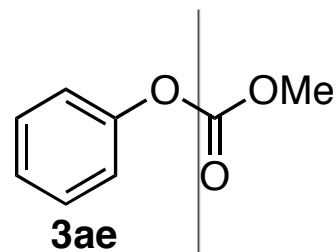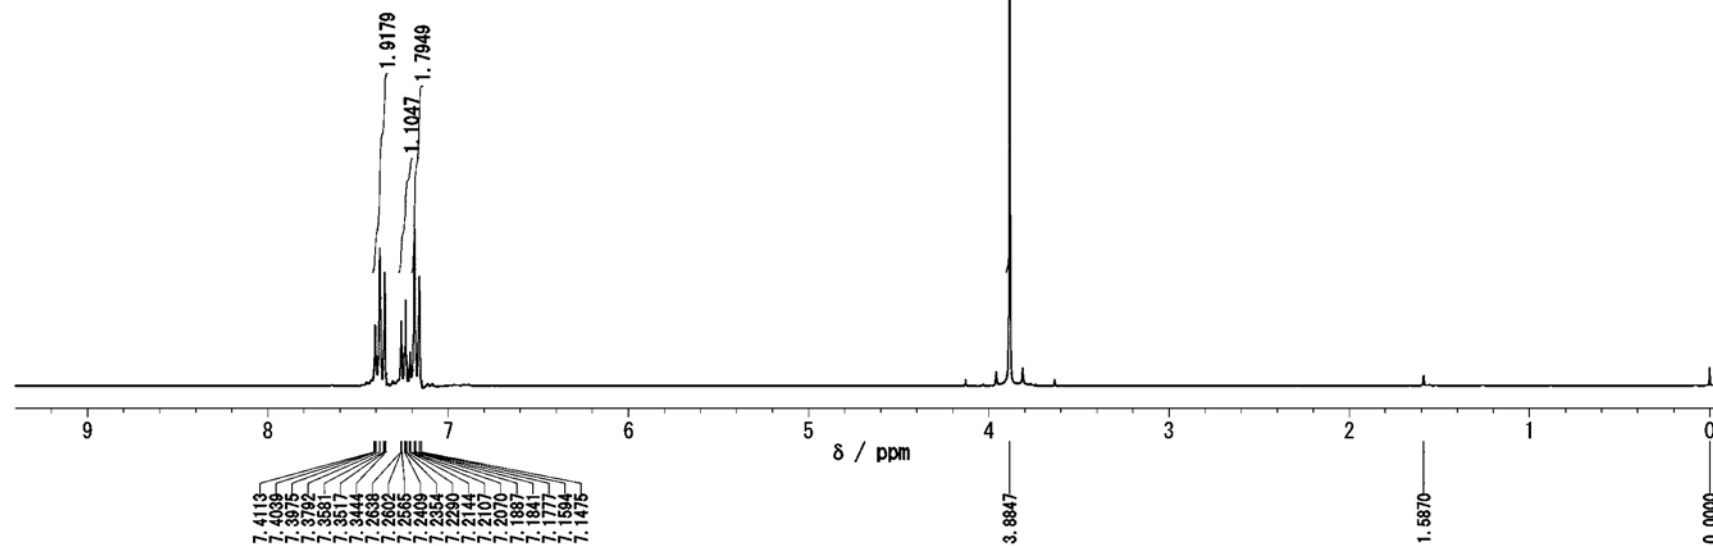

Original File:  
 Date May 15 10  
 Comment  
 C13 Standard Observe  
 Stick=none Tune=6.4 Match=0.4  
 ObsNuc <sup>13</sup>C  
 ExMode NOX  
 ObsFreq 75.43 MHz  
 ObsSet 1.0 kHz  
 ObsFine 996.3672 Hz  
 Point 32768  
 Frequency (Span) 18761.73 Hz  
 Scan 128  
 AcqTime 1.4992 s  
 PD 1.501 s  
 Pulse 6.0  $\mu$ s  
 Temperature 29.0  $^{\circ}$ C  
 Solvent CDCl<sub>3</sub>  
 Reference 77.0 ppm  
 Broad Factor 0.2863 Hz  
 RGain 30  
 Printed 2010/May/16 14:32:09  
 Operator

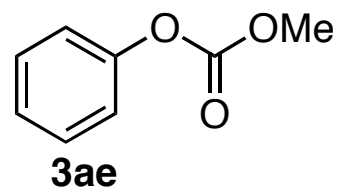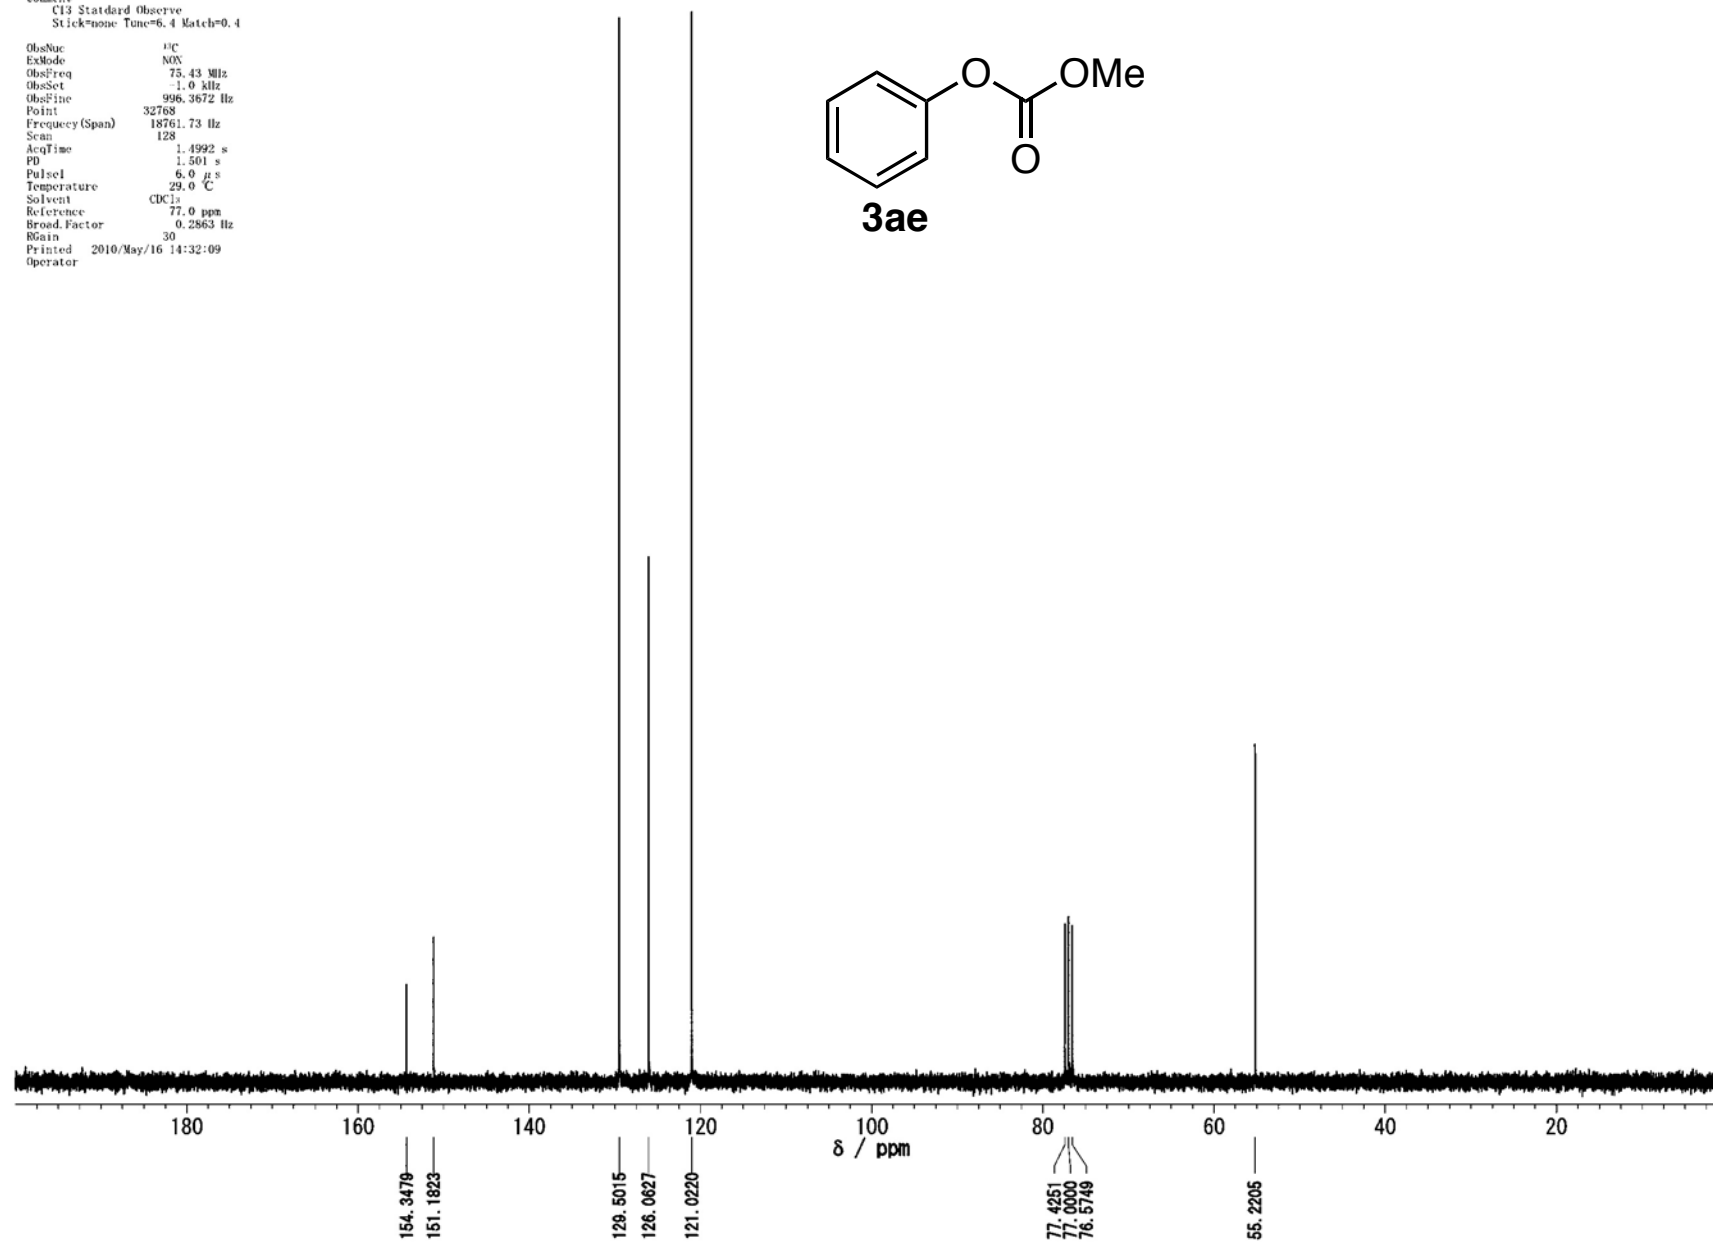

Date May 16 10  
 Comment STANDARD IN OBSERVE  
 ObsNuc  $^1\text{H}$   
 ExMode NON  
 ObsFreq 299.96 MHz  
 ObsSet 1.0 kHz  
 ObsFine 995.0047 Hz  
 Point 16384  
 Frequency (Span) 4500.45 Hz  
 Scan 16  
 AcqTime 3.4983 s  
 PD 1.502 s  
 Pulse 6.0  $\mu\text{s}$   
 Temperature 29.0  $^{\circ}\text{C}$   
 Solvent  $\text{CDCl}_3$   
 Reference 0.0 ppm  
 Broad Factor 0.25 Hz  
 RGain 20  
 Printed 2010/May/16 14:38:38  
 Operator

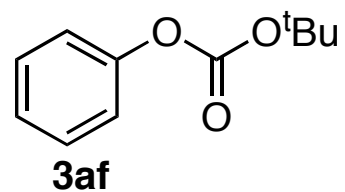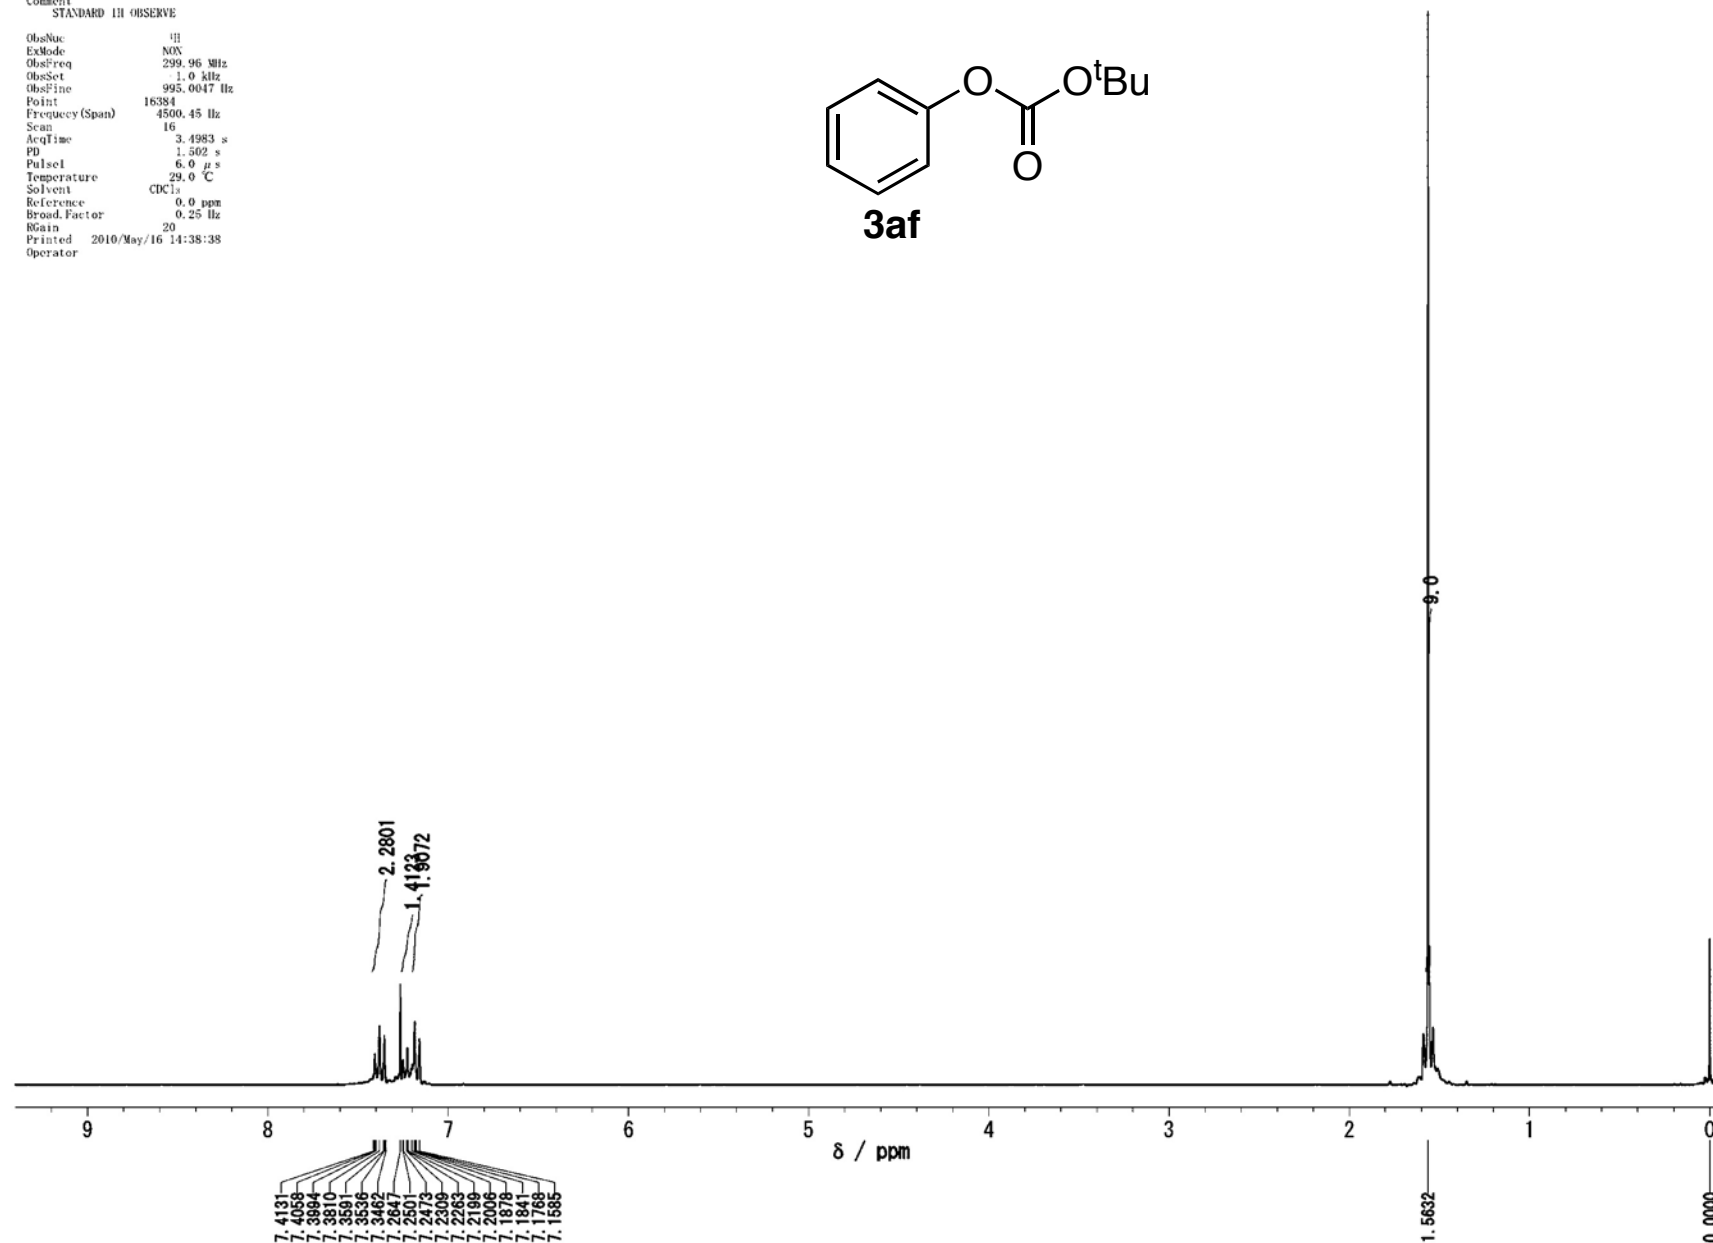

Original File:  
 Date May 15 10  
 Comment  
 C13 Standard Observe  
 Stick=none Tune=6.4 Match=0.4

ObsNuc <sup>13</sup>C  
 ExMode NOX  
 ObsFreq 75.43 MHz  
 ObsSet 1.0 kHz  
 ObsFine 996.3672 Hz  
 Point 32768  
 Frequency (Span) 18761.73 Hz  
 Scan 64  
 AcqTime 1.4992 s  
 PD 1.501 s  
 Pulse 6.0 μs  
 Temperature 29.0 °C  
 Solvent CDCl<sub>3</sub>  
 Reference 77.0 ppm  
 Broad.Factor 0.2863 Hz  
 RGain 30  
 Printed 2010/May/16 14:40:55  
 Operator

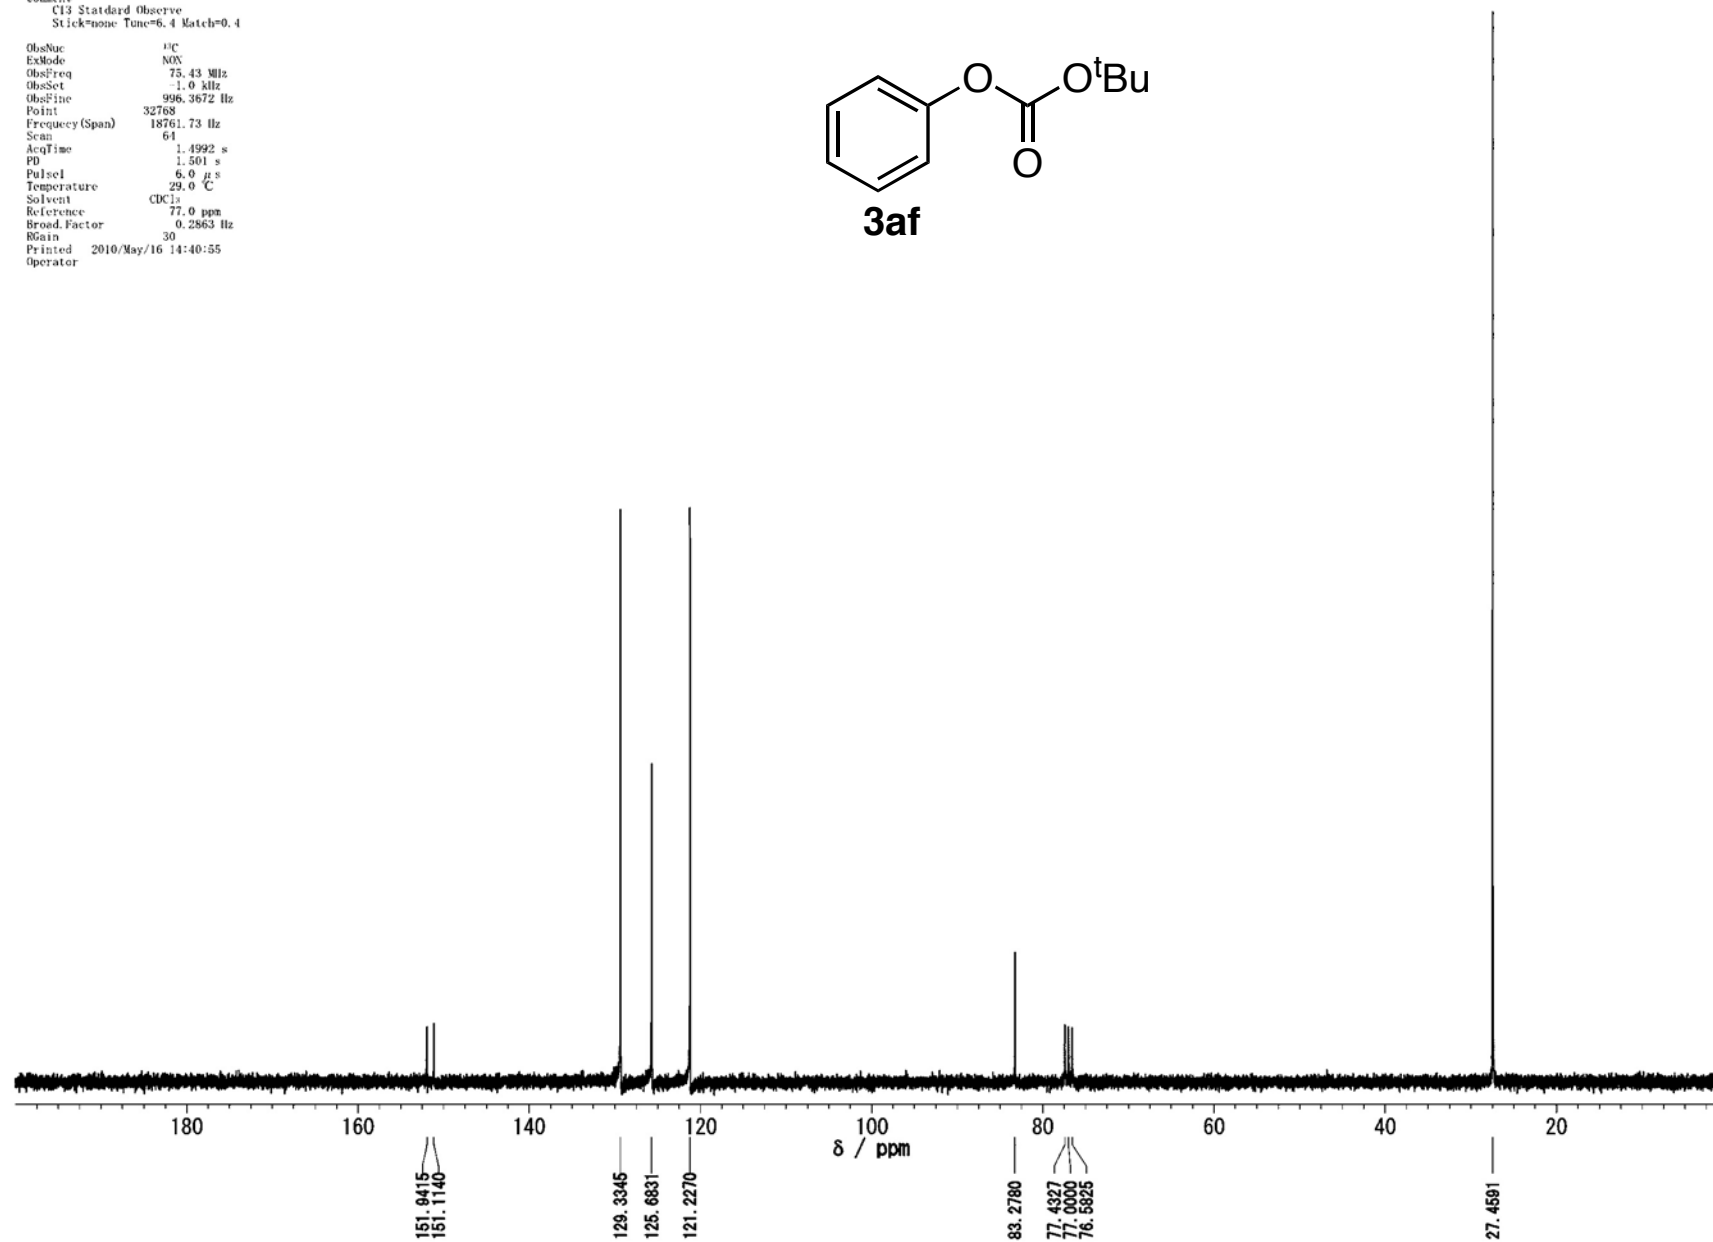

Original File:  
 Date Jun 2 09  
 Comment  
 STANDARD IN OBSERVE

ObsNuc  $^1\text{H}$   
 ExMode NON  
 ObsFreq 299.96 MHz  
 ObsSet 1.0 kHz  
 ObsFine 995.0047 Hz  
 Point 16384  
 Frequency (Span) 4500.45 Hz  
 Scan 16  
 AcqTime 3.4983 s  
 PD 1.502 s  
 Pulse 6.0  $\mu\text{s}$   
 Temperature 29.0  $^{\circ}\text{C}$   
 Solvent  $\text{CDCl}_3$   
 Reference 0.0 ppm  
 Broad Factor 0.1373 Hz  
 RGain 14  
 Printed 2010/May/16 14:46:04  
 Operator

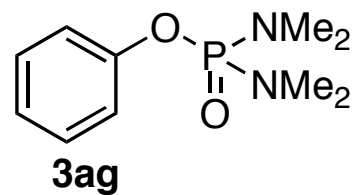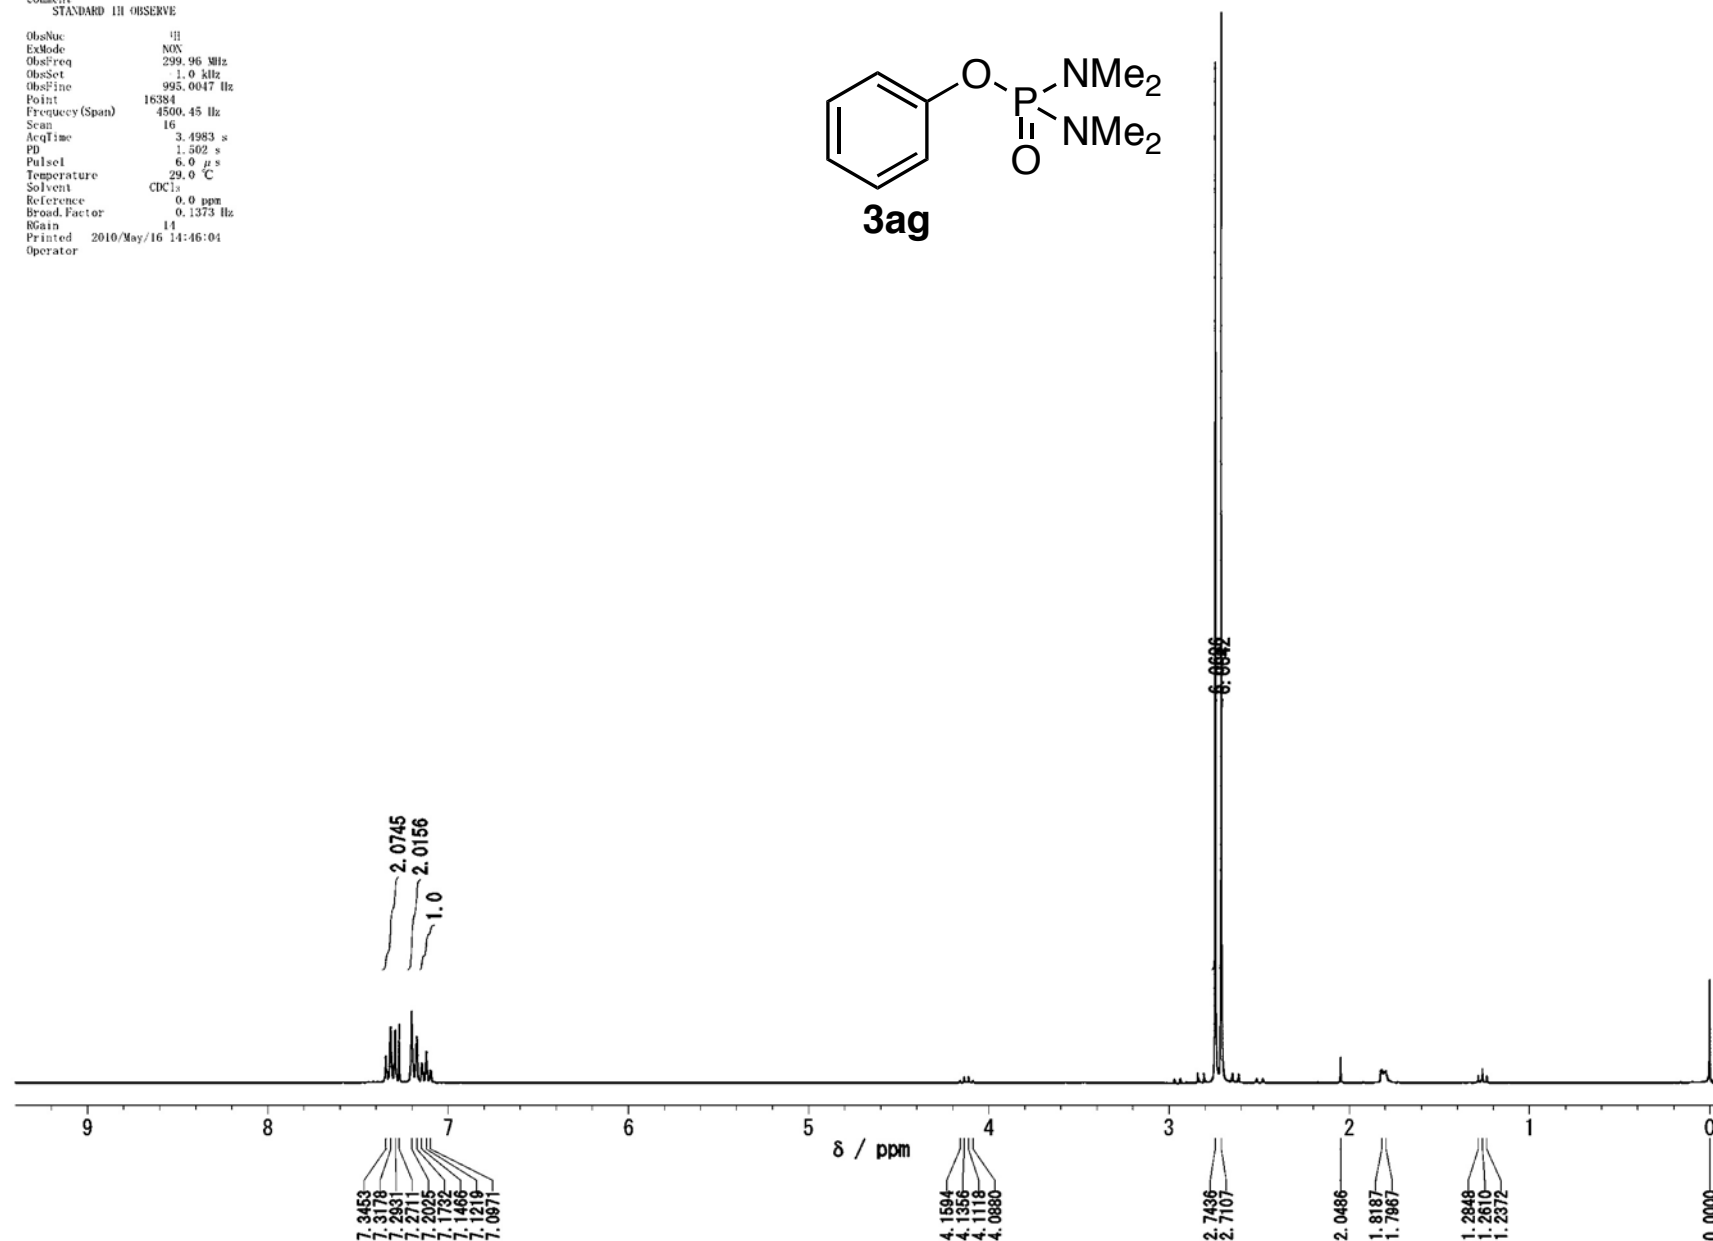

A

ObsNuc <sup>13</sup>C  
ExMode NOX  
ObsFreq 75.43 MHz  
ObsSet -1.0 kHz  
ObsFine 996.3672 Hz  
Point 32768  
Frequency (Span) 18761.73 Hz  
Scan 128  
AcqTime 1.4992 s  
PD 1.501 s  
Pulse 6.0  $\mu$ s  
Temperature 29.0  $^{\circ}$ C  
Solvent CDCl<sub>3</sub>  
Reference 77.0 ppm  
Broad. Factor 0.2863 Hz  
RGain 30  
Printed 2010/May/16 14:48:14  
Operator

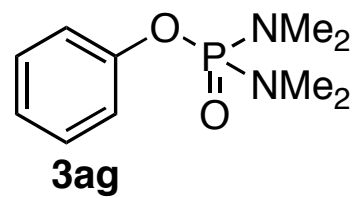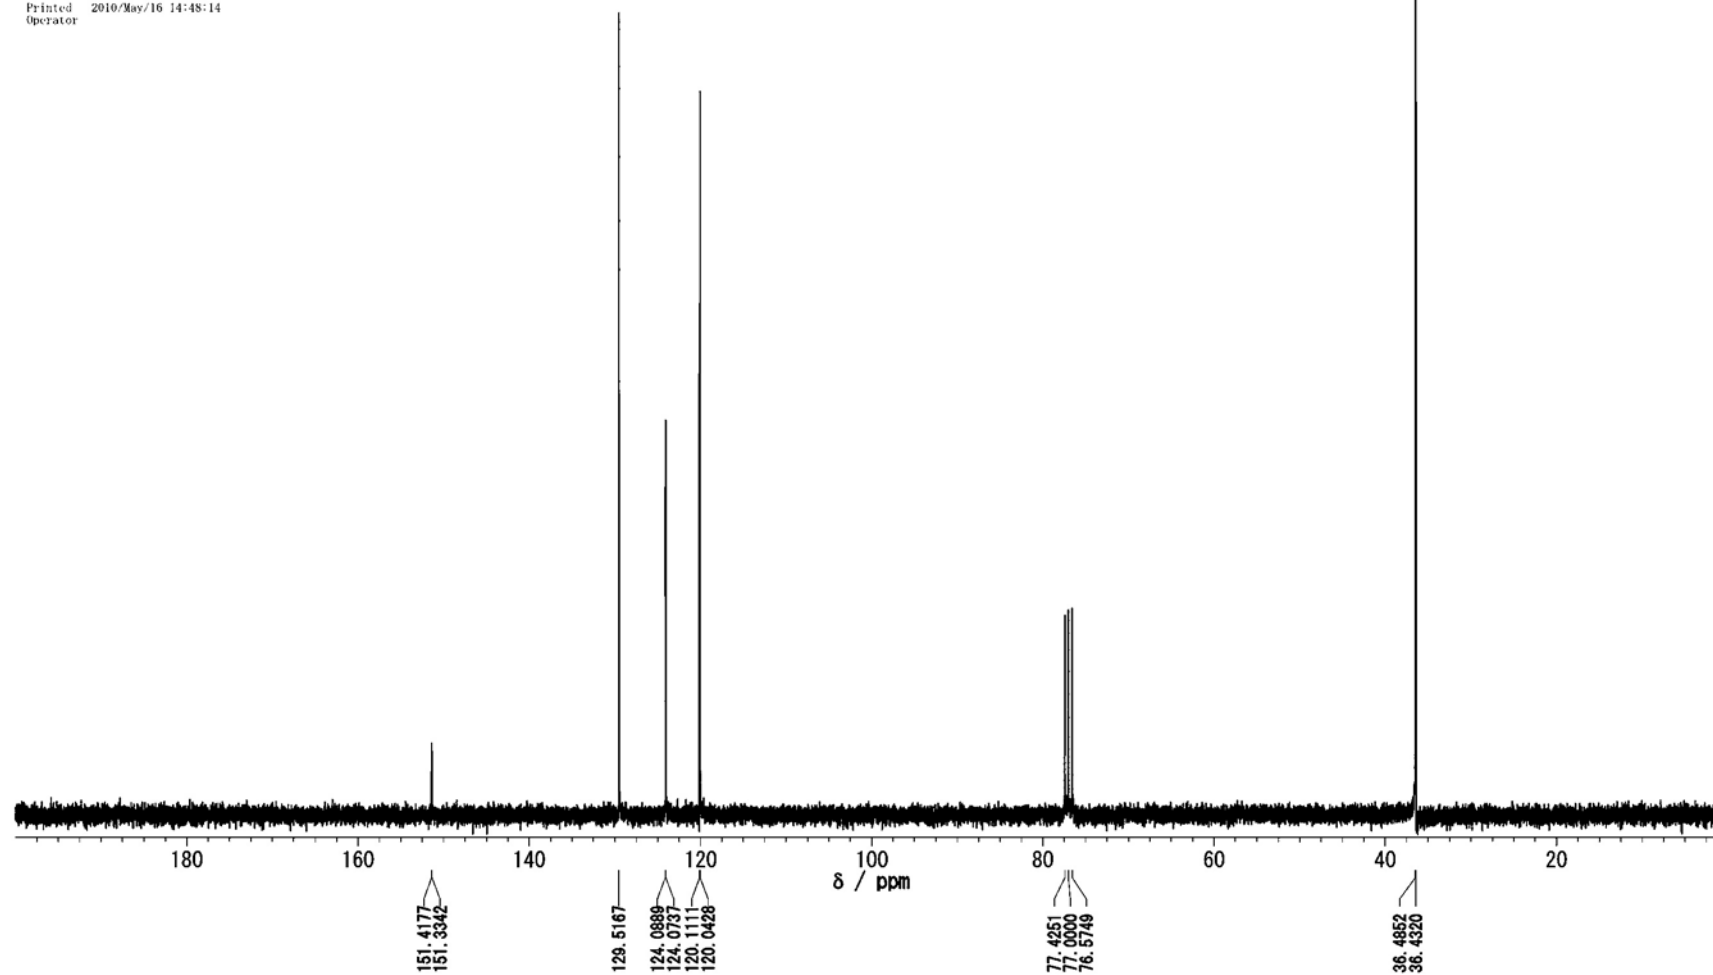

A

Date May 16 10  
Comment STANDARD 1H OBSERVE  
ObsNuc <sup>1</sup>H  
ExMode NON  
ObsFreq 299.96 MHz  
ObsSet -1.0 kHz  
ObsFine 995.0047 Hz  
Point 16384  
Frequency (Span) 4500.45 Hz  
Scan 16  
AcqTime 3.4983 s  
PD 1.502 s  
Pulse 6.0  $\mu$ s  
Temperature 29.0  $^{\circ}$ C  
Solvent CDCl<sub>3</sub>  
Reference 0.0 ppm  
Broad Factor 0.25 Hz  
RGain 12  
Printed 2010/May/16 14:54:05  
Operator

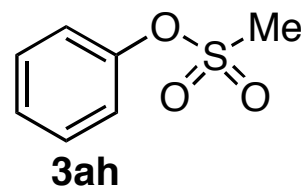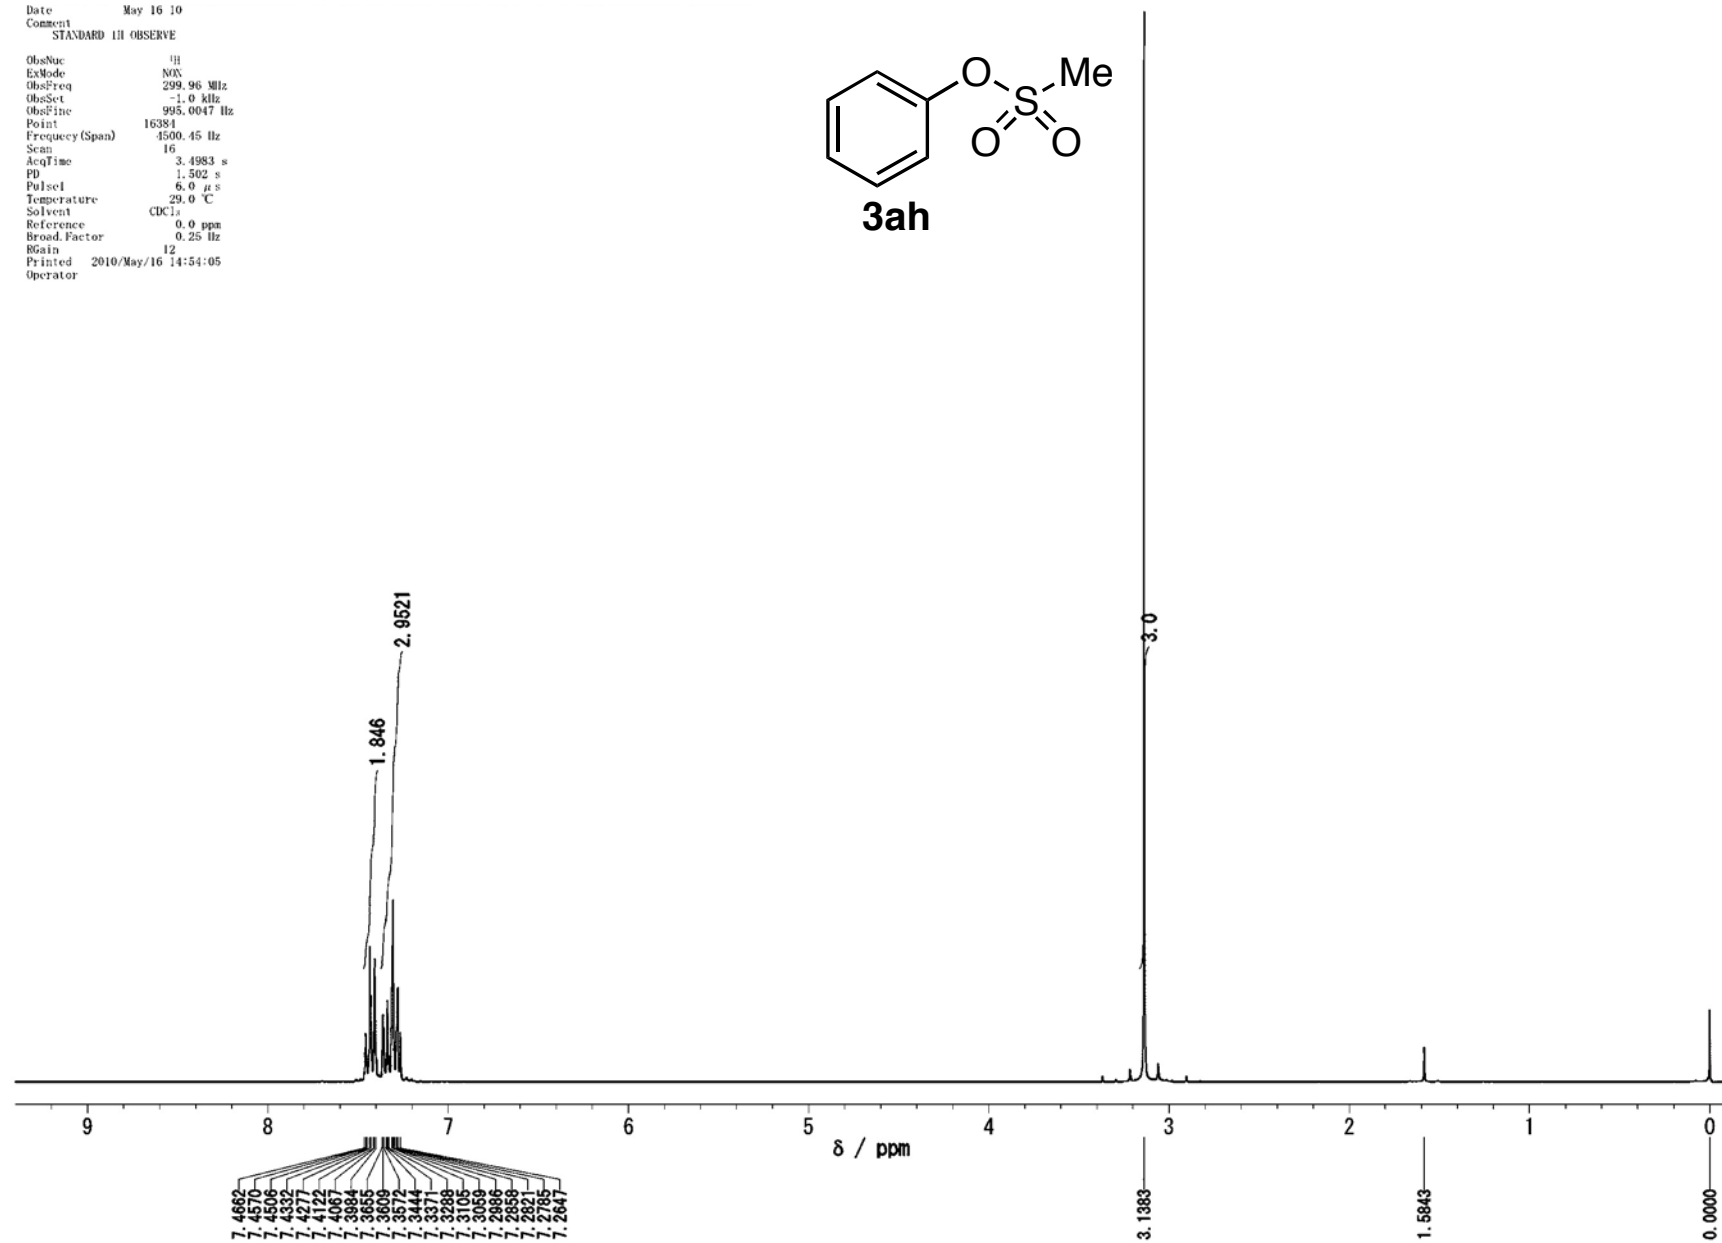



Date May 16 10  
 Comment C13 Standard Observe  
 Stick=none Tune=6.4 Match=0.4  
 ObsNuc <sup>13</sup>C  
 ExMode NOX  
 ObsFreq 75.43 MHz  
 ObsSet -1.0 kHz  
 ObsFine 996.3672 Hz  
 Point 32768  
 Frequency (Span) 18761.73 Hz  
 Scan 256  
 AcqTime 1.4992 s  
 PD 1.501 s  
 Pulse 6.0 μs  
 Temperature 29.0 °C  
 Solvent CDCl<sub>3</sub>  
 Reference 77.0 ppm  
 Broad. Factor 0.25 Hz  
 RGain 30  
 Printed 2010/May/16 14:56:53  
 Operator

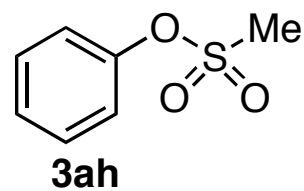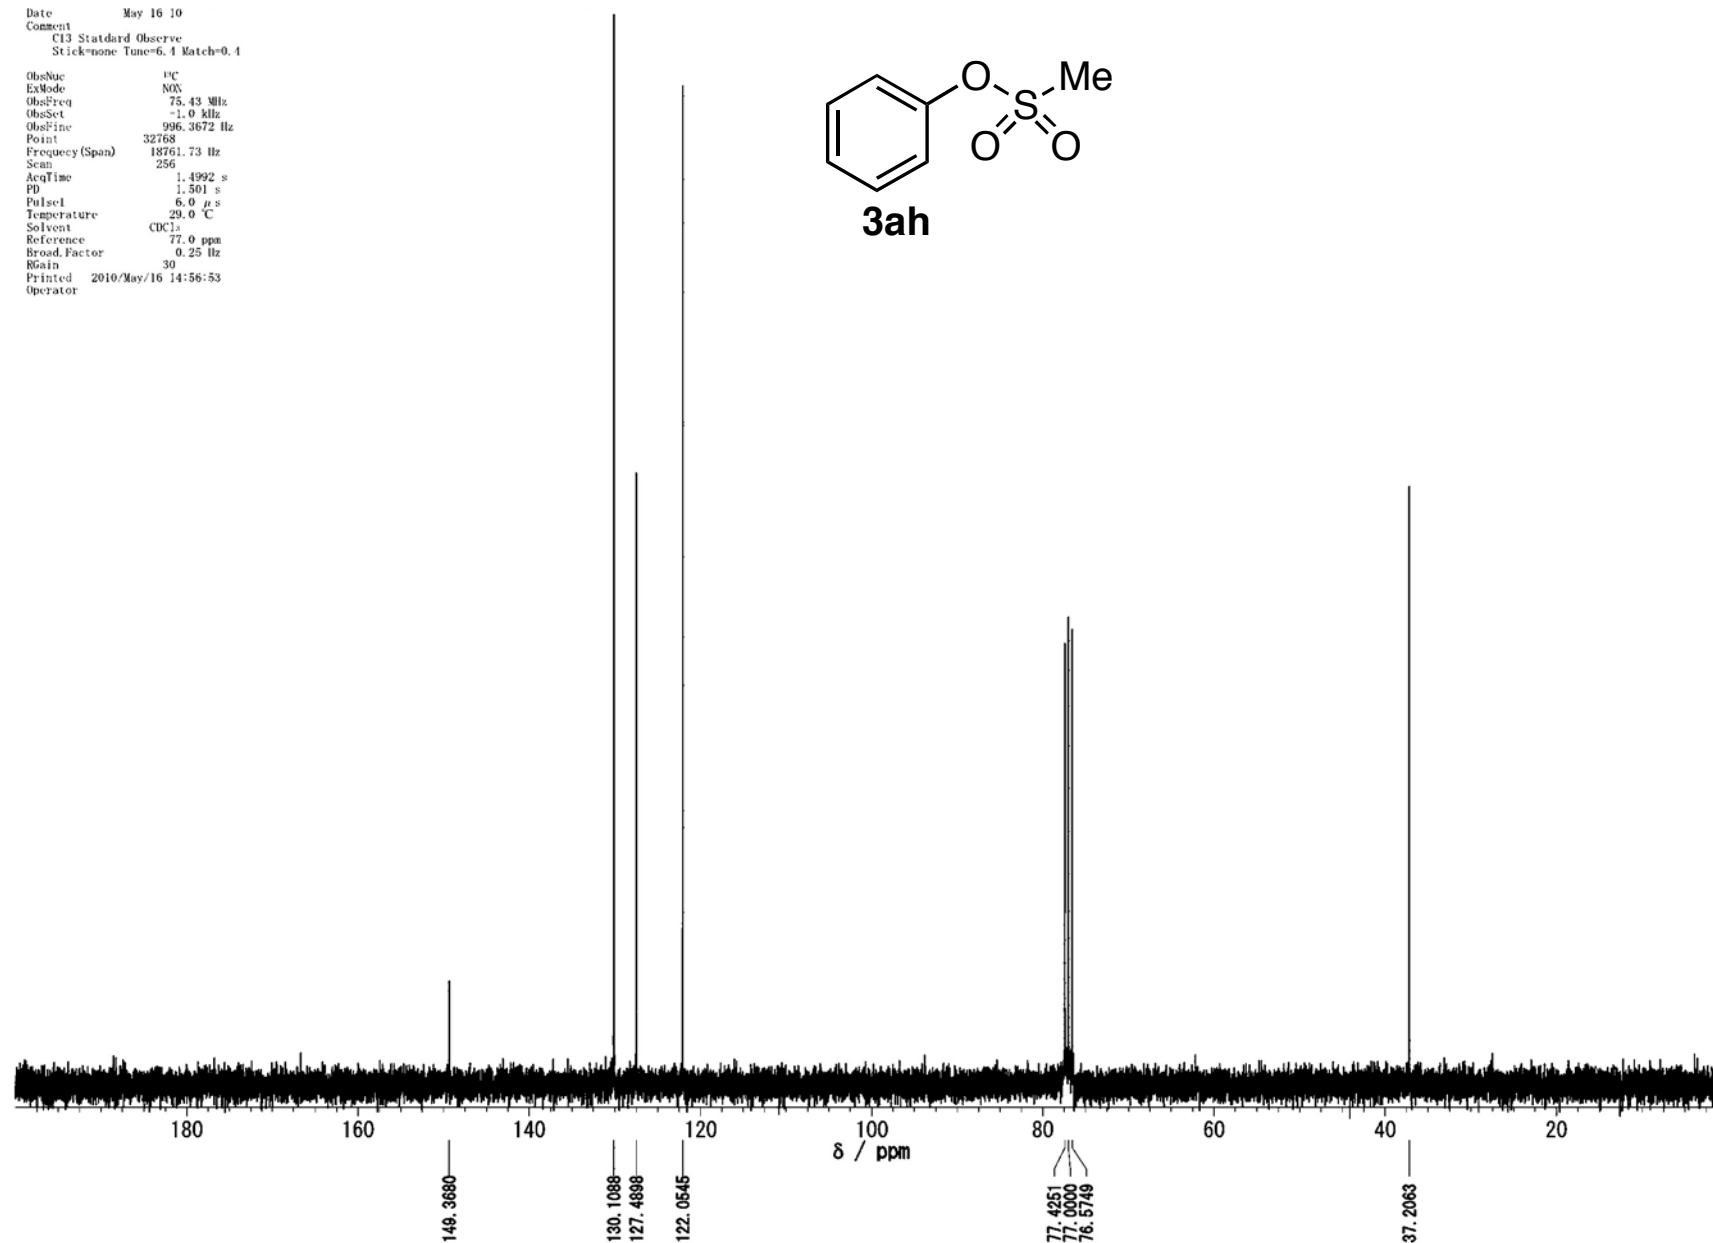

Date May 14 10  
 Comment STANDARD IN OBSERVE  
 ObsNuc <sup>1</sup>H  
 ExMode NON  
 ObsFreq 299.96 MHz  
 ObsSet -1.0 kHz  
 ObsFine 995.0047 Hz  
 Point 16384  
 Frequency (Span) 4500.45 Hz  
 Scan 16  
 AcqTime 3.4983 s  
 PD 1.502 s  
 Pulse 6.0  $\mu$ s  
 Temperature 29.0  $^{\circ}$ C  
 Solvent CDCl<sub>3</sub>  
 Reference 0.0 ppm  
 Broad Factor 0.25 Hz  
 RGain 24  
 Printed 2010/May/14 16:22:04  
 Operator

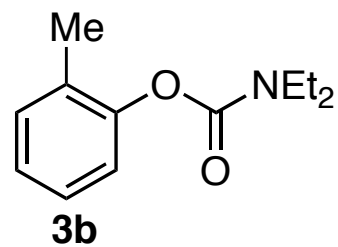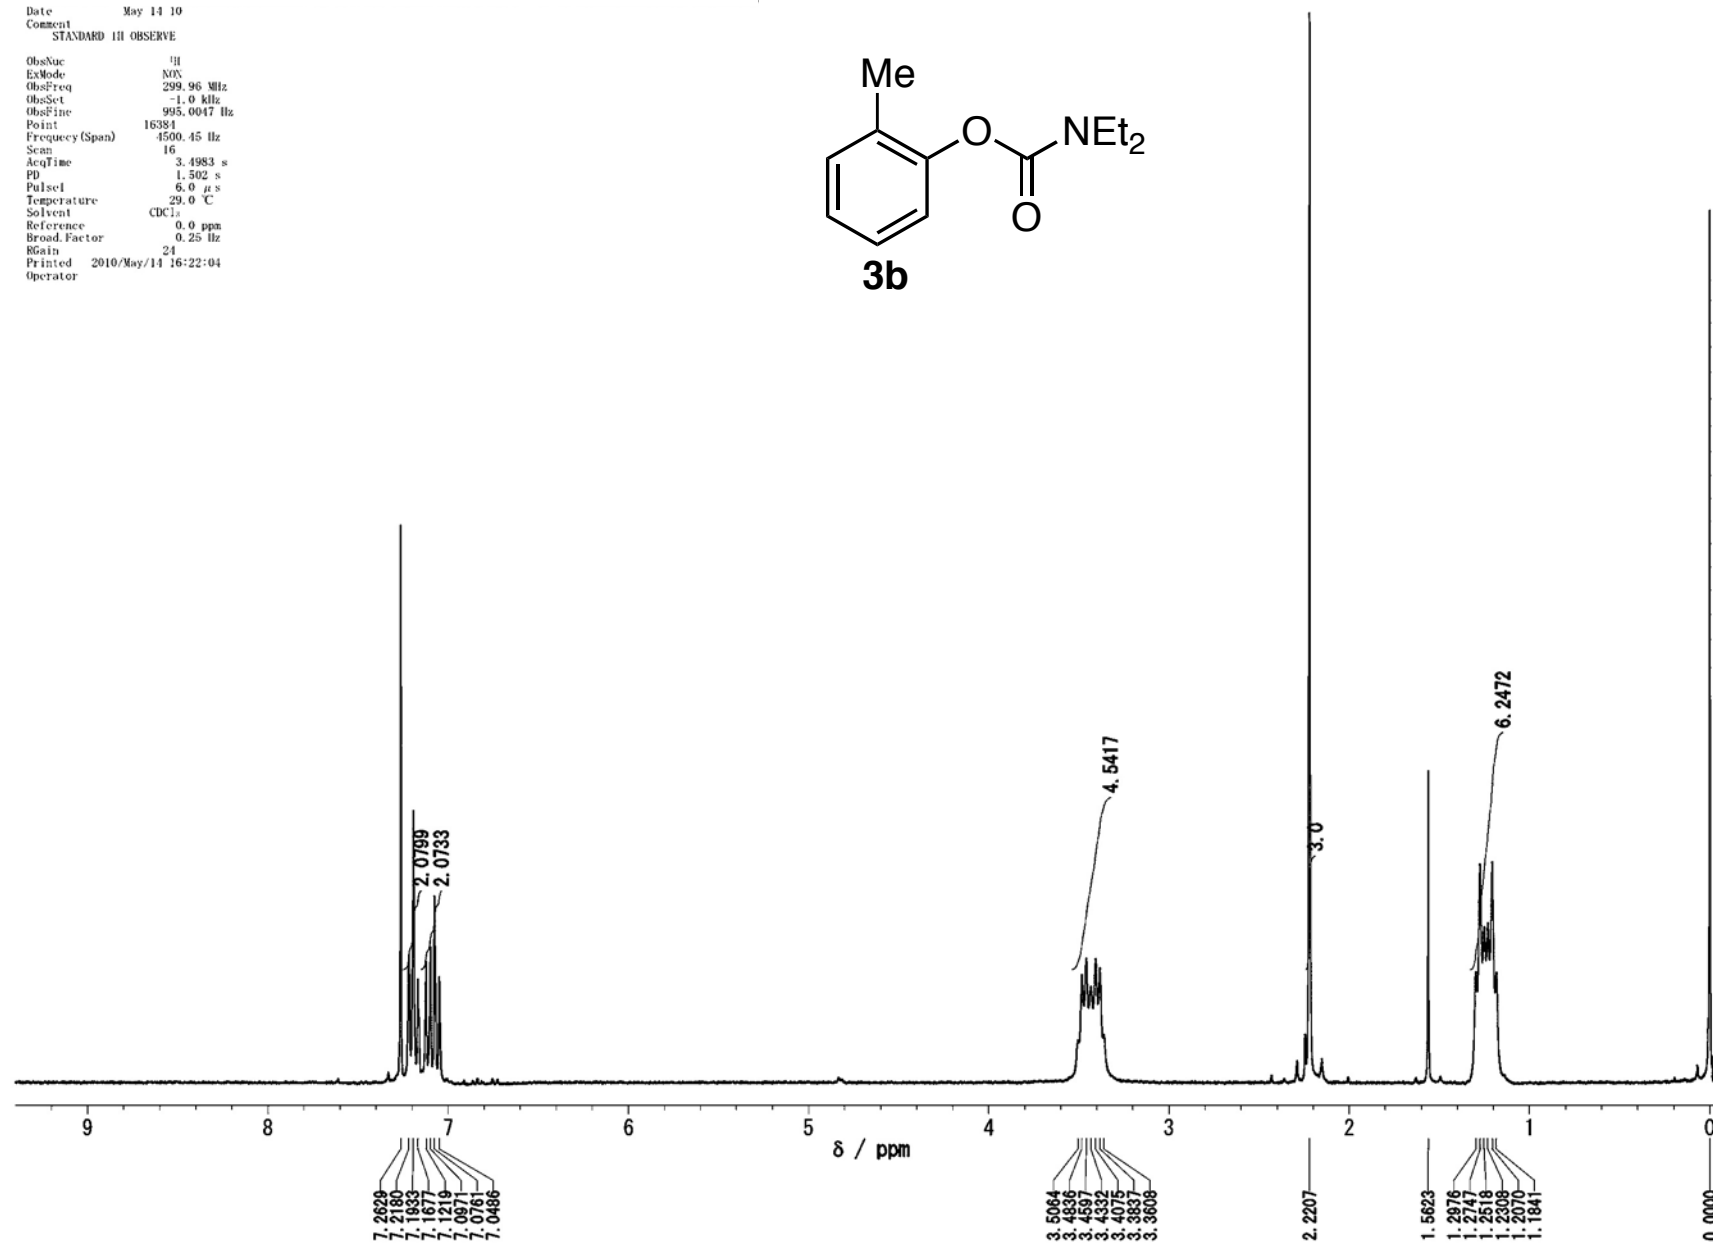

Original File:  
 Date May 12 10  
 Comment  
 C13 Standard Observe  
 Stick=none Tune=6.4 Match=0.4

ObsNuc <sup>13</sup>C  
 ExMode NOX  
 ObsFreq 75.43 MHz  
 ObsSet 1.0 kHz  
 ObsFine 996.3672 Hz  
 Point 32768  
 Frequency (Span) 18761.73 Hz  
 Scan 256  
 AcqTime 1.4992 s  
 PD 1.501 s  
 Pulse 6.0 μs  
 Temperature 29.0 °C  
 Solvent CDCl<sub>3</sub>  
 Reference 77.0 ppm  
 Broad Factor 0.2863 Hz  
 RGain 30  
 Printed 2010/May/14 16:23:57  
 Operator

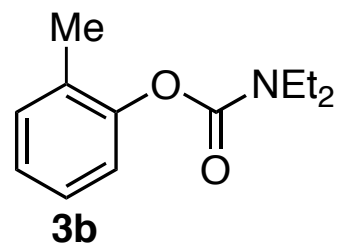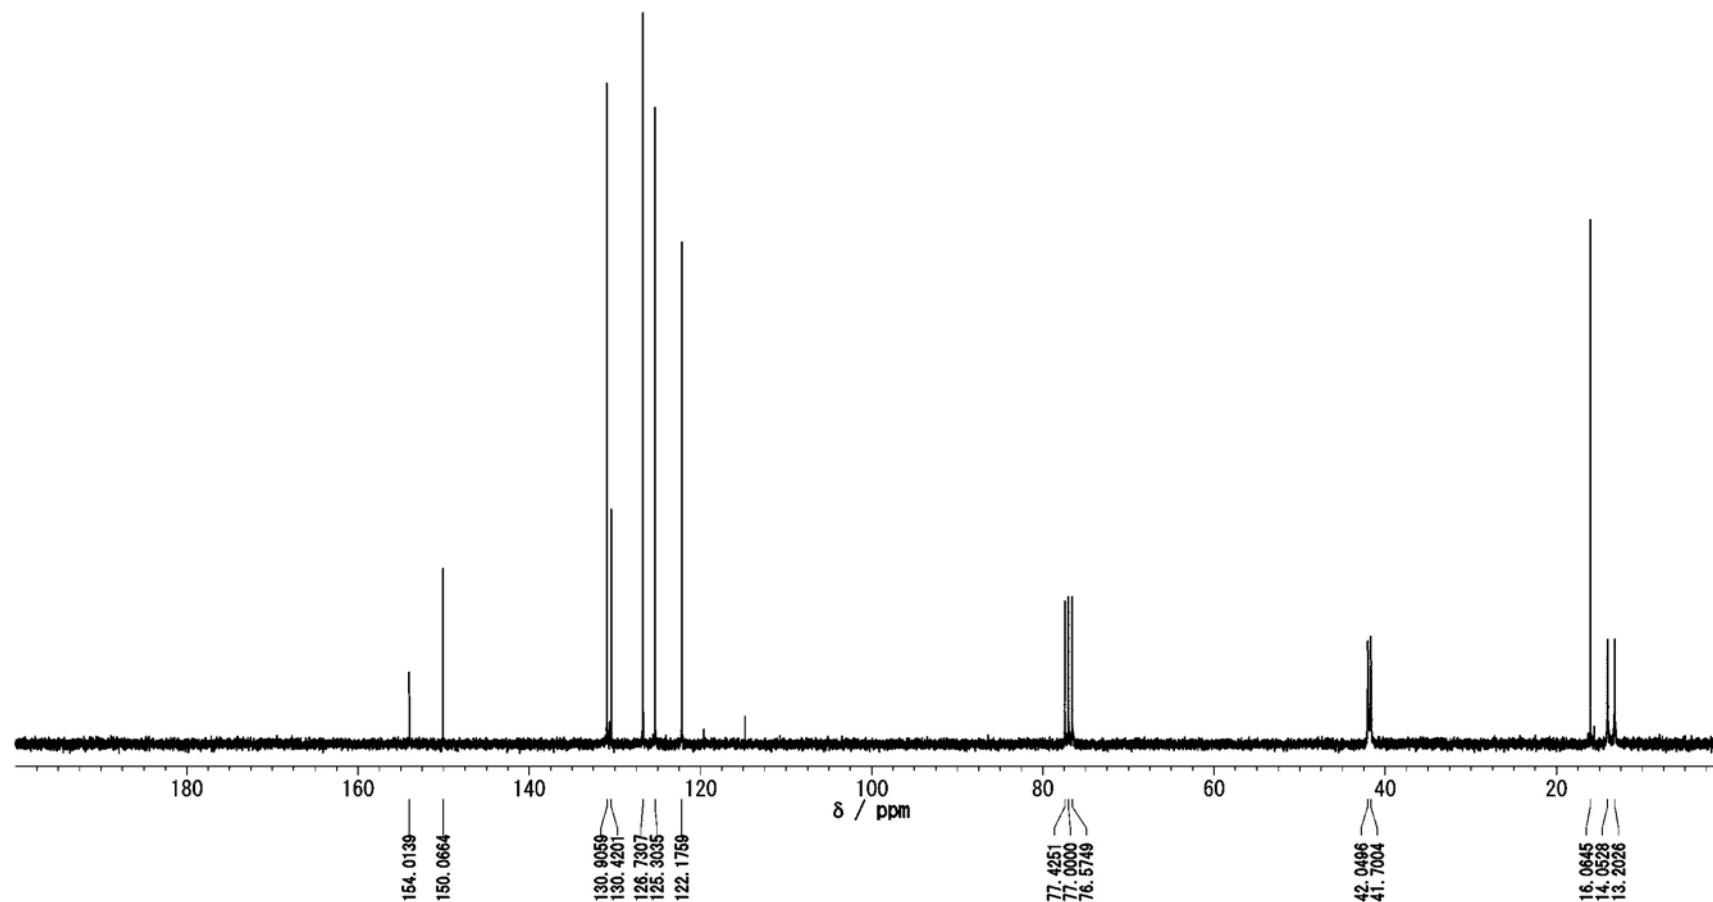

Original File: 0\_1\_22\_09  
 Date: 0\_1\_22\_09  
 Comment: STANDARD III OBSERVE  
 ObsNu: 311  
 ExMode: N/A  
 ObsFreq: 299.96 MHz  
 ObsSet: 1.0 kHz  
 ObsTime: 915.0017 Hz  
 Point: 16381  
 Frequency (Span): 1500.45 Hz  
 Scan: 16  
 AcqTime: 3.1983 s  
 PD: 1.502 s  
 Pulse: 6.0  $\mu$ s  
 Temperature: 29.0  $^{\circ}$ C  
 Solvent: CDCl<sub>3</sub>  
 Reference: 0.0 ppm  
 Brook Factor: 0.1574 Hz  
 Rbain: 19  
 Printed: 2010 May 13 21:10:10  
 Operator:

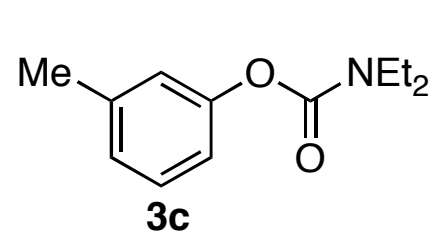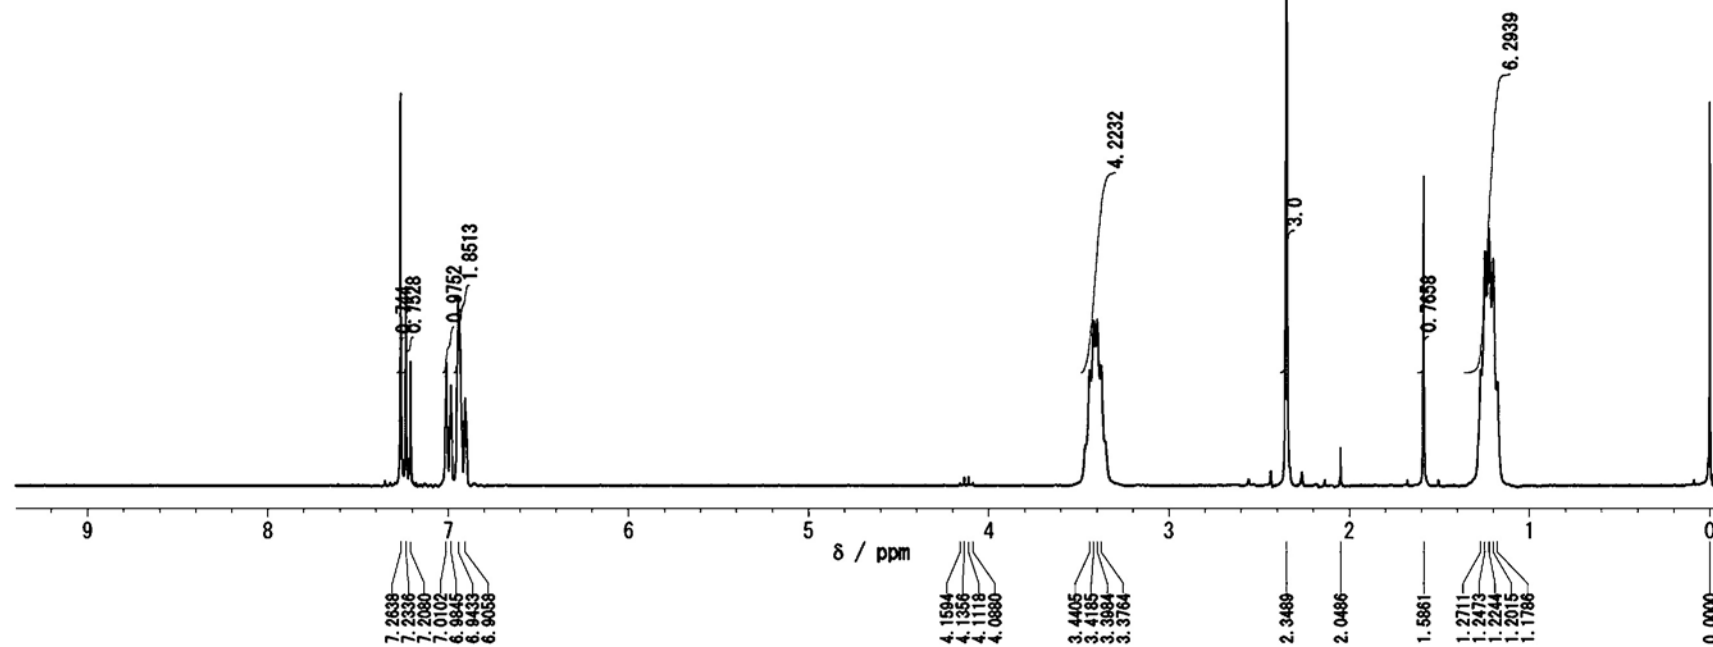

Original File:  
 Date May 12 10  
 Comment  
 C13 Standard Observe  
 Stick=none Tune=6.4 Match=0.4

ObsNuc  $^{13}\text{C}$   
 ExMode NON  
 ObsFreq 75.43 MHz  
 ObsSet 1.0 kHz  
 ObsFine 996.3672 Hz  
 Point 32768  
 Frequency (Span) 18761.73 Hz  
 Scan 128  
 AcqTime 1.4992 s  
 PD 1.501 s  
 Pulse 6.0  $\mu\text{s}$   
 Temperature 29.0  $^{\circ}\text{C}$   
 Solvent  $\text{CDCl}_3$   
 Reference 77.0 ppm  
 Broad.Factor 0.2863 Hz  
 RGain 30  
 Printed 2010/May/14 15:16:16  
 Operator

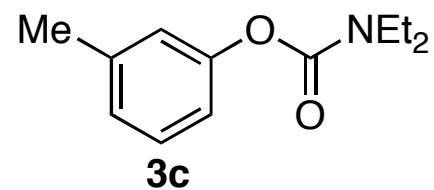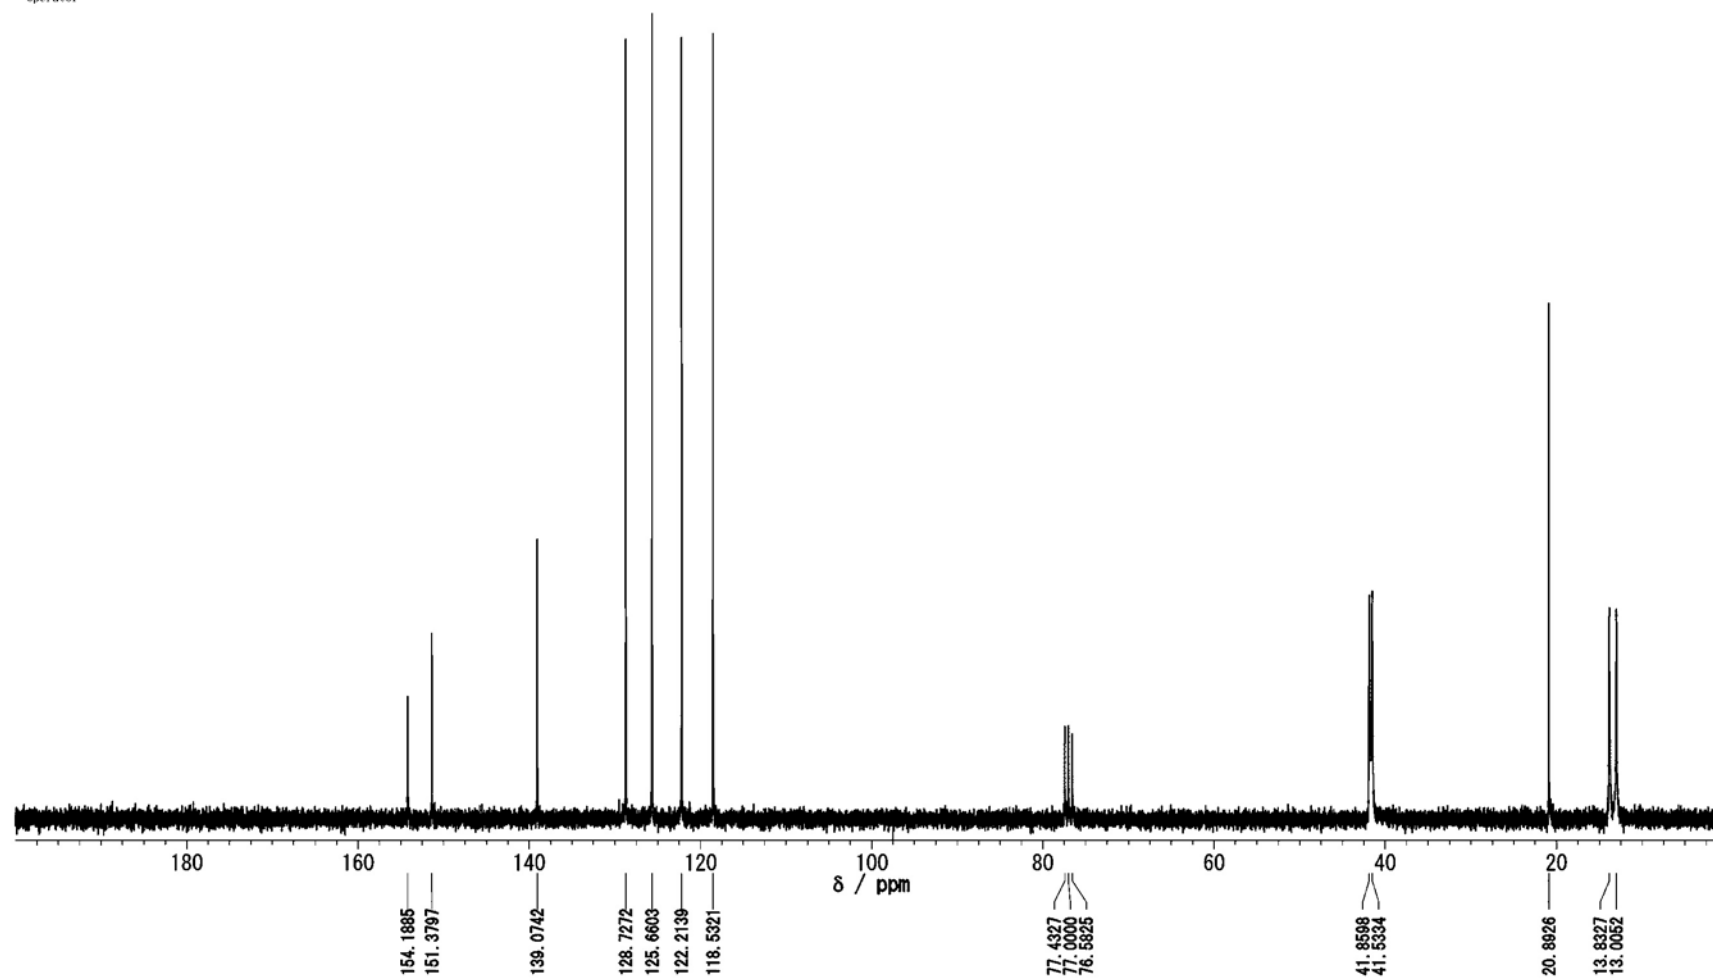

Original File:   
 Date Oct 26 09   
 Comment STANDARD IN OBSERVE   
 ObsNuc <sup>1</sup>H   
 ExMode NON   
 ObsFreq 299.96 MHz   
 ObsSet 1.0 kHz   
 ObsPine 995.0047 Hz   
 Point 16384   
 Frequency (Span) 4500.45 Hz   
 Scan 16   
 AcqTime 3.4983 s   
 PD 1.502 s   
 Pulse 6.0  $\mu$ s   
 Temperature 29.0  $^{\circ}$ C   
 Solvent CDCl<sub>3</sub>   
 Reference 0.0 ppm   
 Broad Factor 0.1373 Hz   
 RGain 30   
 Printed 2010/May/13 21:34:13   
 Operator

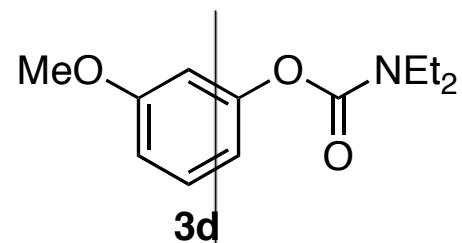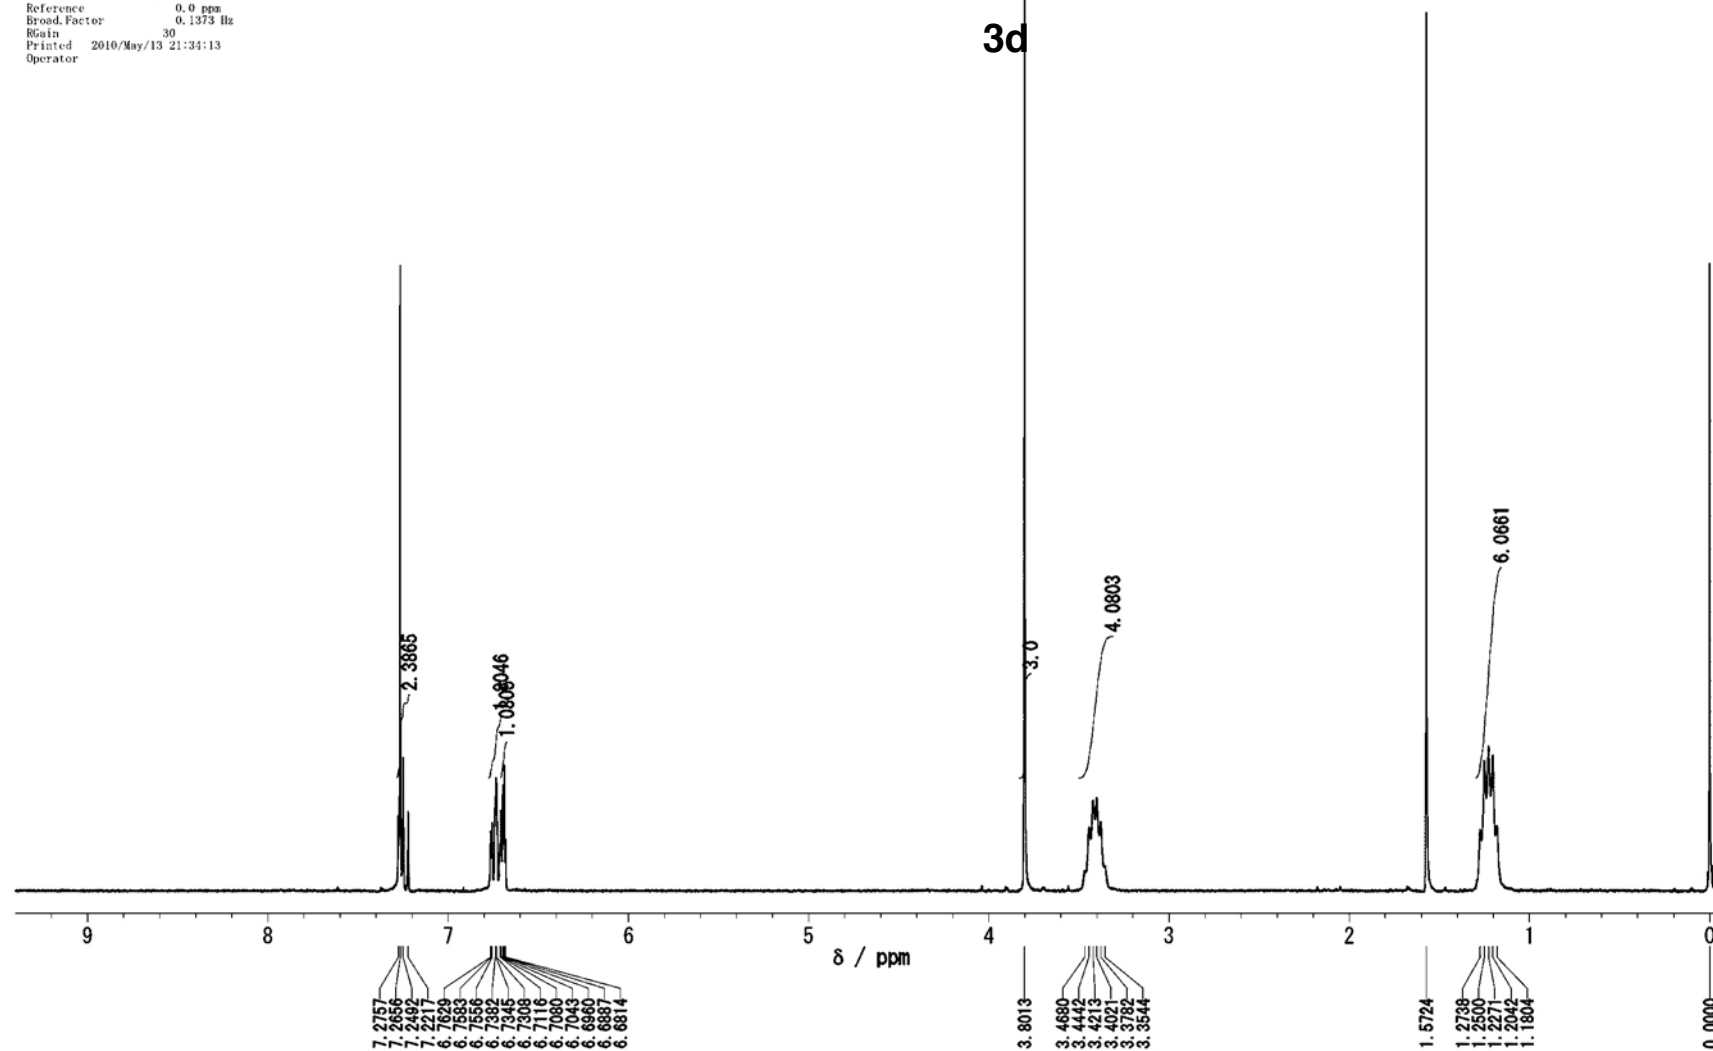

Original File: Mar 4 10  
 Date  
 Comment C13 Standard Observe  
 Stick=none Tune=6.4 Match=0.4  
 ObsNuc <sup>13</sup>C  
 ExMode NON  
 ObsFreq 75.43 MHz  
 ObsSet 1.0 kHz  
 ObsFine 996.3672 Hz  
 Point 32768  
 Frequency (Span) 18761.73 Hz  
 Scan 128  
 AcqTime 1.4992 s  
 PD 1.501 s  
 Pulse 6.0  $\mu$ s  
 Temperature 29.0  $^{\circ}$ C  
 Solvent CDCl<sub>3</sub>  
 Reference 77.0 ppm  
 Broad Factor 0.2863 Hz  
 RGain 30  
 Printed 2010/May/14 15:20:40  
 Operator

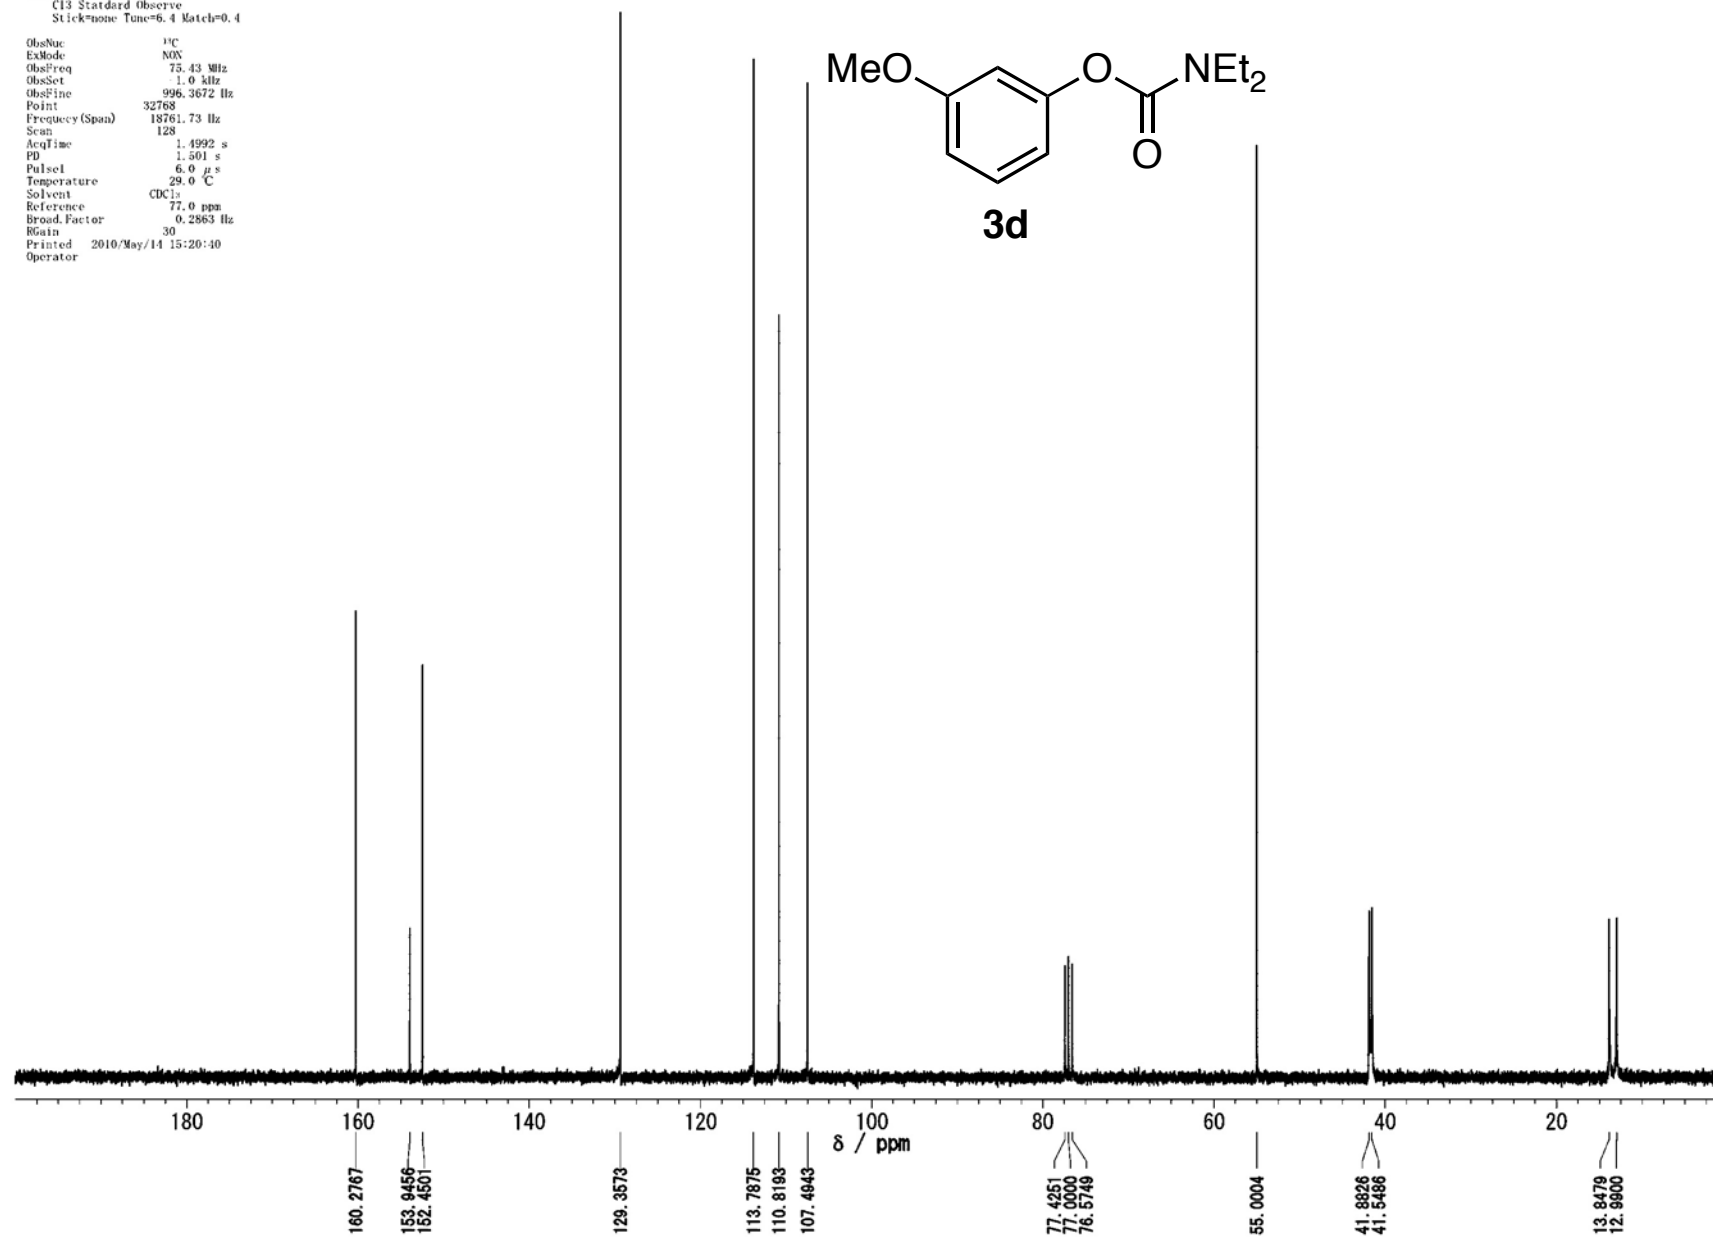

Original File:   
 Date: Oct 27 09   
 Comment: STANDARD 1H OBSERVE   
 ObsNuc: <sup>1</sup>H   
 ExMode: AOX   
 ObsFreq: 299.96 MHz   
 ObsSet: 1.0 kHz   
 ObsPine: 995.0047 Hz   
 Point: 16481   
 Frequency (Spun): 1500.45 Hz   
 Scan: 16   
 AcqTime: 3.1983 s   
 PP: 1.502 s   
 Pulse1: 6.0  $\mu$ s   
 Temperature: 29.0  $^{\circ}$ C   
 Solvent: (CDCl)<sub>3</sub>   
 Reference: 0.0 ppm   
 Broad Factor: 0.1573 Hz   
 RGain: 30   
 Printed: 2010 May 02 16:30:10   
 Operator:

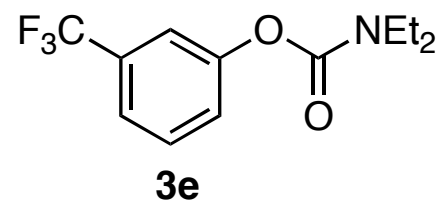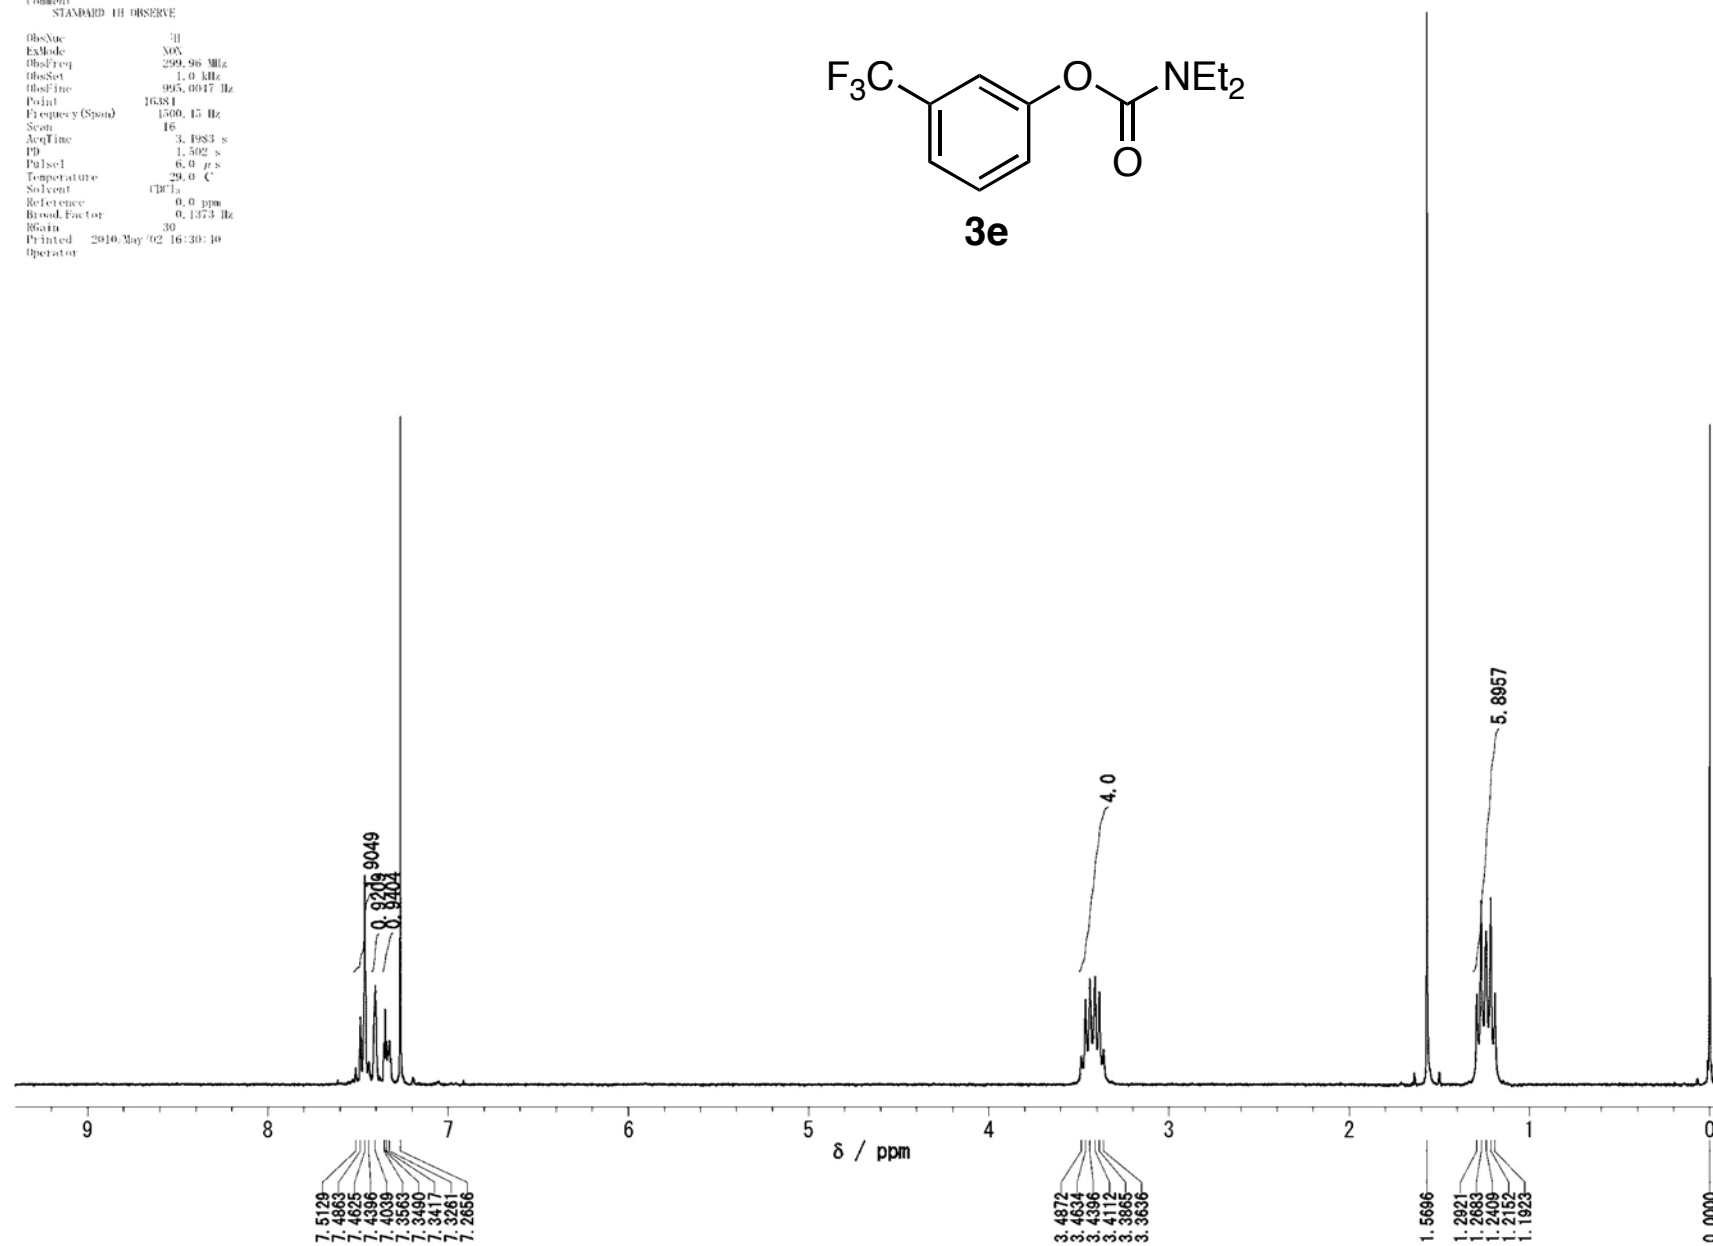



Original File:  
Date Apr 29 10  
Comment  
C13 Standard Observe  
Stick=none Tune=6.4 Match=0.4

ObsNuc  $^{13}\text{C}$   
ExMode NON  
ObsFreq 75.43 MHz  
ObsSet 1.0 kHz  
ObsFine 996.3672 Hz  
Point 32768  
Frequency (Span) 18761.73 Hz  
Scan 10000  
AcqTime 1.25837  
PD 1.25837  
Pulse 6.02334  
Temperature 29.0  
Solvent  $\text{CDCl}_3$   
Reference 77.0 ppm  
Broad Factor 0.2863 Hz  
RGain 30  
Printed 2010/May/02 16:32:00  
Operator

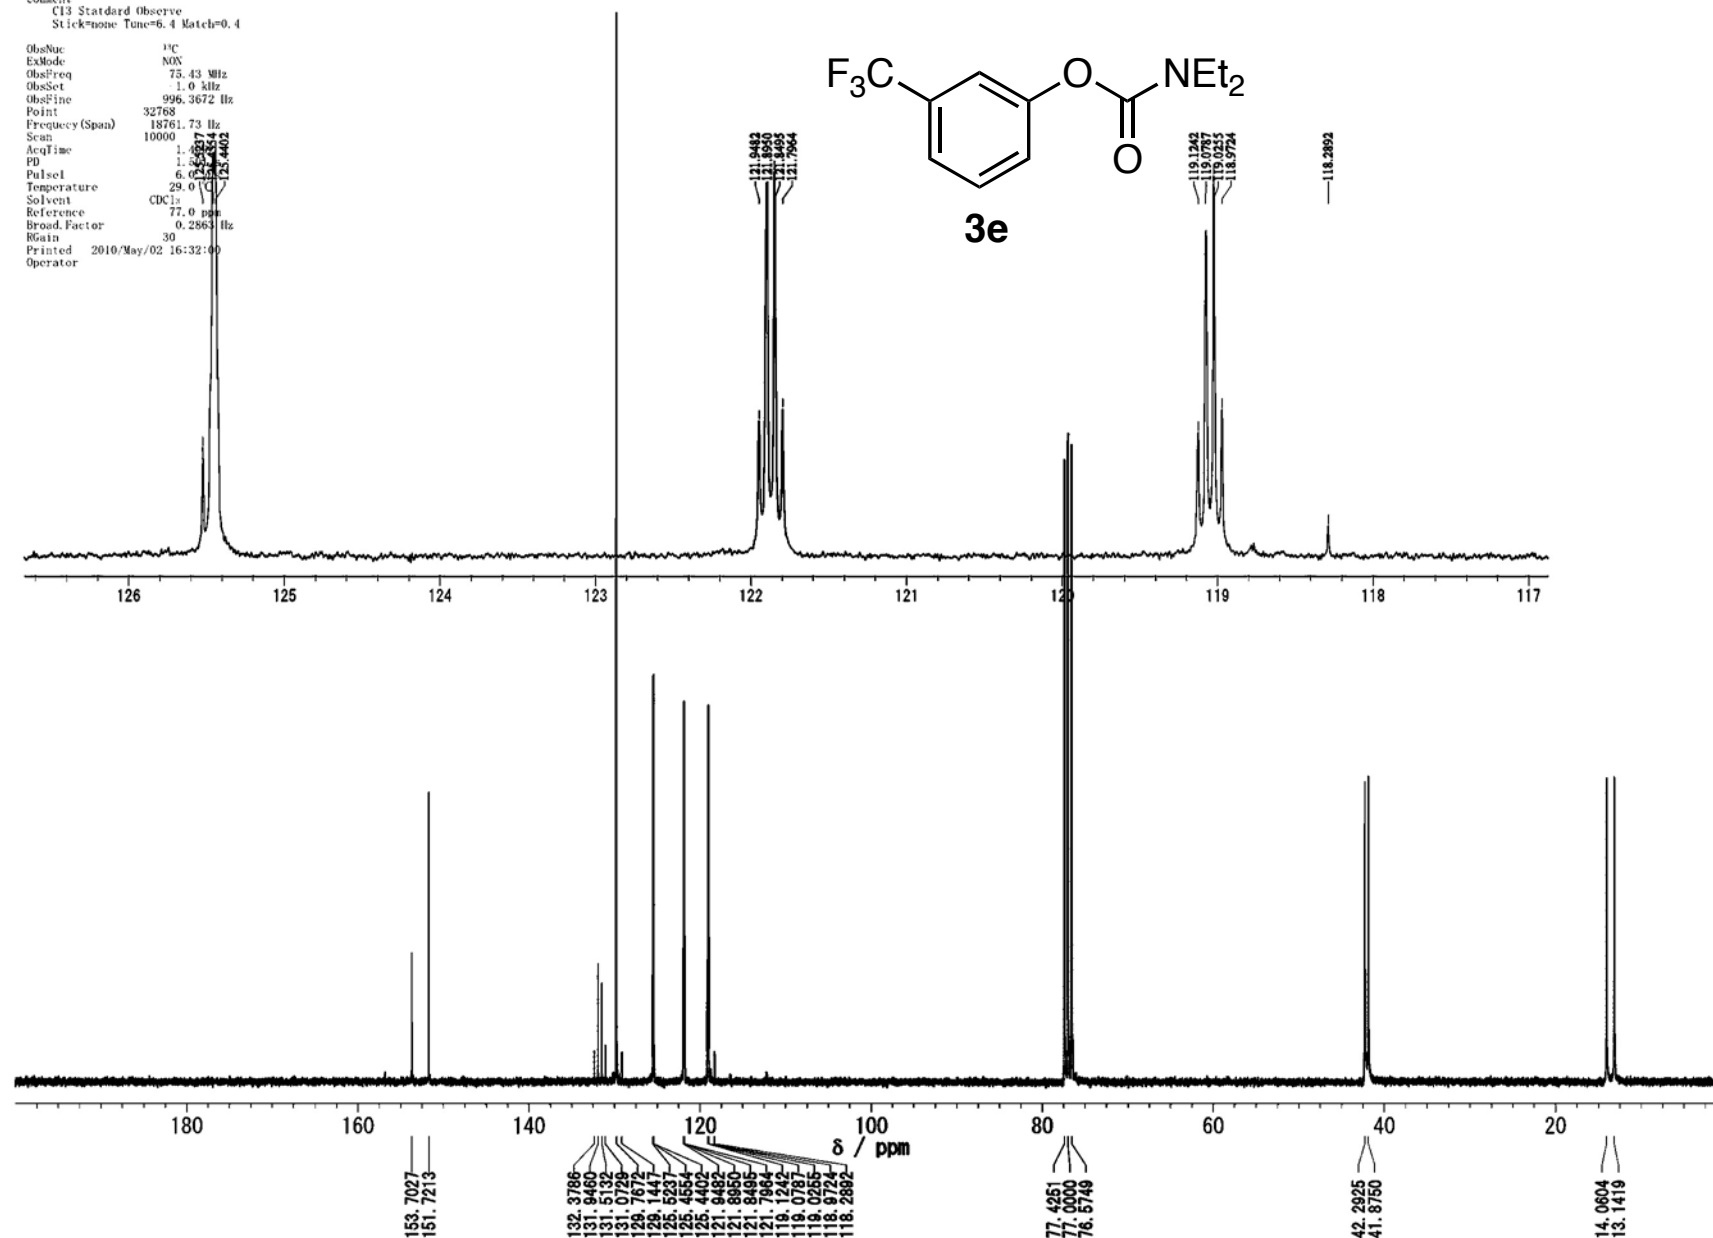

Original File:  
 Date Apr 30 10  
 Comment  
 STANDARD IN OBSERVE

ObsNuc <sup>1</sup>H  
 ExMode NON  
 ObsFreq 299.96 MHz  
 ObsSet 1.0 kHz  
 ObsFine 995.0047 Hz  
 Point 16384  
 Frequency (Span) 4500.45 Hz  
 Scan 16  
 AcqTime 3.4983 s  
 PD 1.502 s  
 Pulse 6.0  $\mu$ s  
 Temperature 29.0  $^{\circ}$ C  
 Solvent CDCl<sub>3</sub>  
 Reference 0.0 ppm  
 Broad. Factor 0.1373 Hz  
 RGain 30  
 Printed 2010/Jun/24 14:32:47  
 Operator

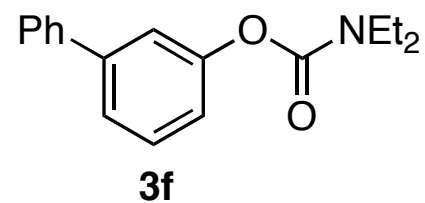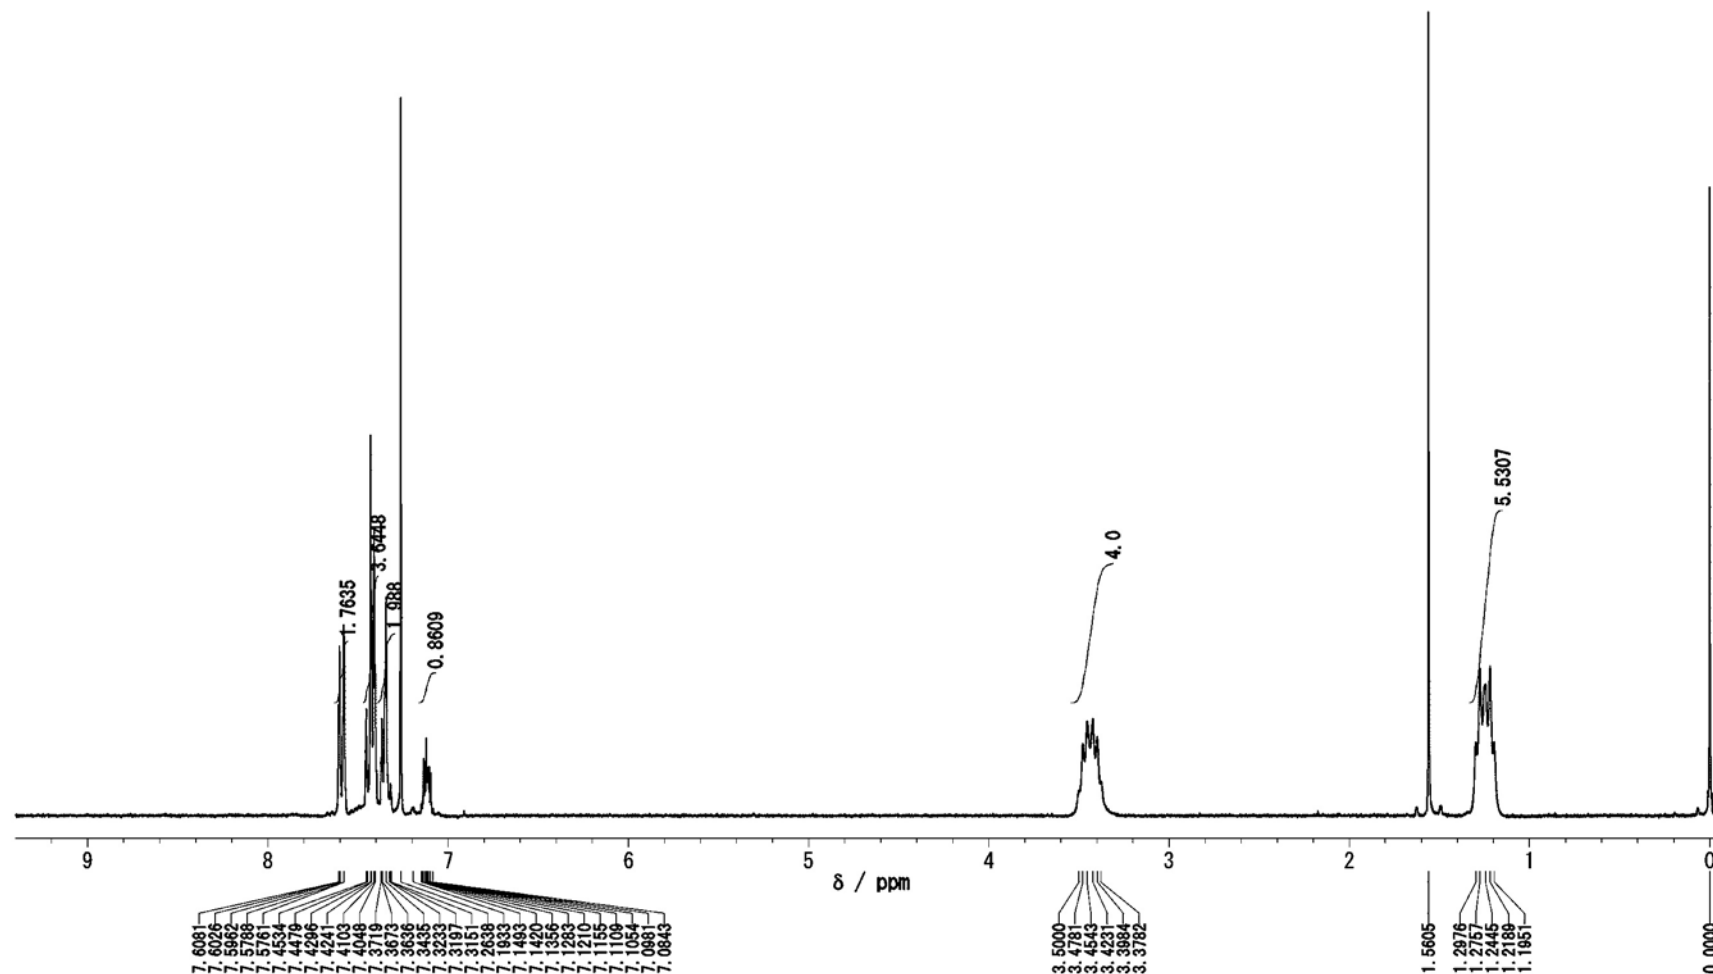

Original File:  
 Date Mar 5 10  
 Comment  
 C13 Standard Observe  
 Stick=none Tune=6.4 Match=0.4  
 ObsVac isC  
 ExMode NON  
 ObsFreq 75.43 MHz  
 ObsSet -1.0 kHz  
 ObsFine 996.3672 Hz  
 Point 32768  
 Frequency (Span) 18761.73 Hz  
 Scan 128  
 AcqTime 1.4992 s  
 PD 1.501 s  
 Pulsol 6.0  $\mu$ s  
 Temperature 29.0  $^{\circ}$ C  
 Solvent CDCl<sub>3</sub>  
 Reference 77.0 ppm  
 Broad.Factor 0.2863 Hz  
 RGain 30  
 Printed 2010/May/02 16:36:16  
 Operator

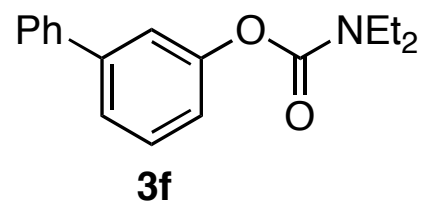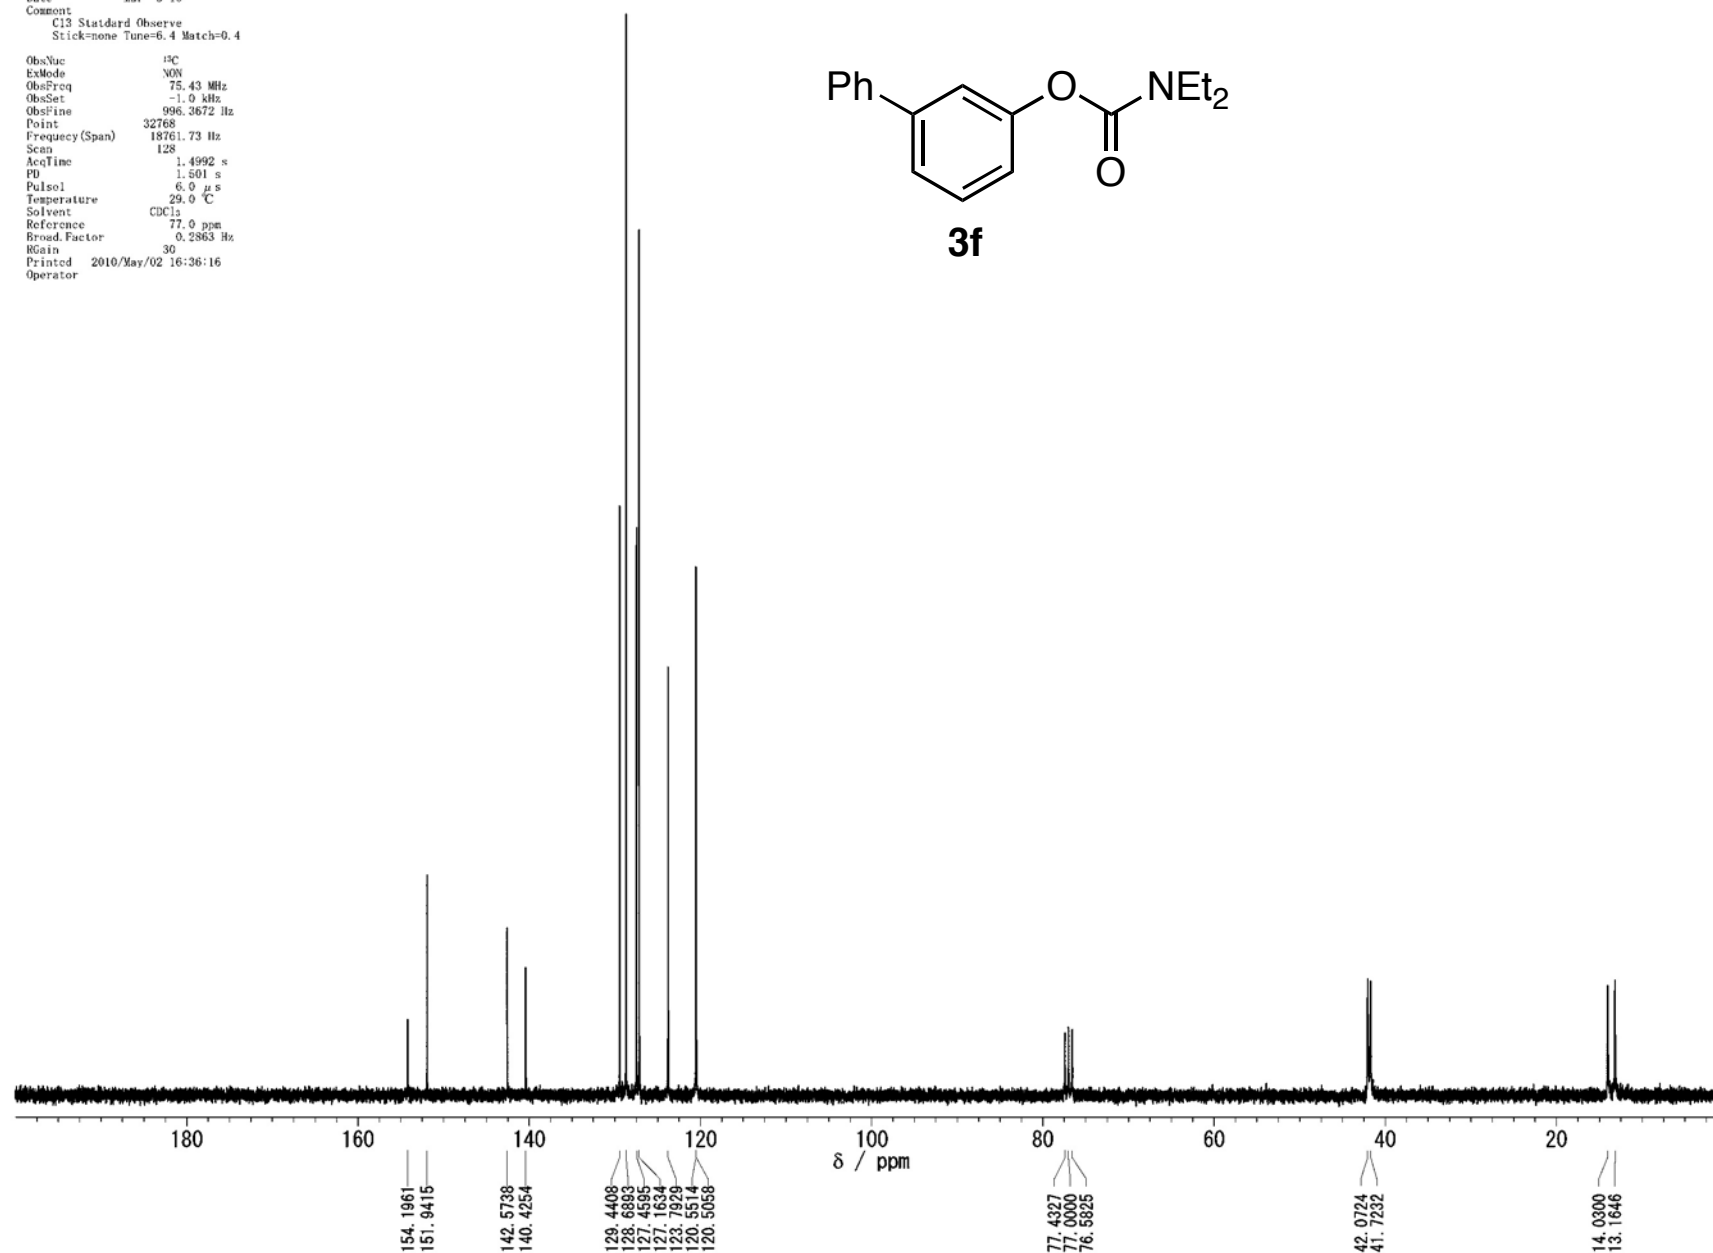

Original File: Nov 5 09  
 Date: Nov 5 09  
 Comment: STANDARD IN OBSERVE  
 ObsNuc: <sup>1</sup>H  
 ExMode: NON  
 ObsFreq: 299.96 MHz  
 ObsSet: 1.0 kHz  
 ObsPine: 995.0047 Hz  
 Point: 16384  
 Frequency (Span): 4500.45 Hz  
 Scan: 16  
 AcqTime: 3.4983 s  
 PD: 1.502 s  
 Pulse: 6.0  $\mu$ s  
 Temperature: 29.0  $^{\circ}$ C  
 Solvent: CDCl<sub>3</sub>  
 Reference: 0.0 ppm  
 Broad Factor: 0.1373 Hz  
 RGain: 24  
 Printed: 2010/May/13 21:57:58  
 Operator:

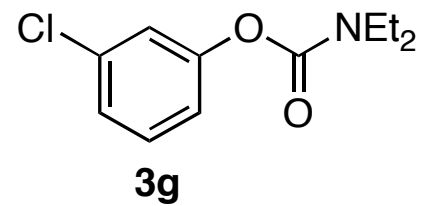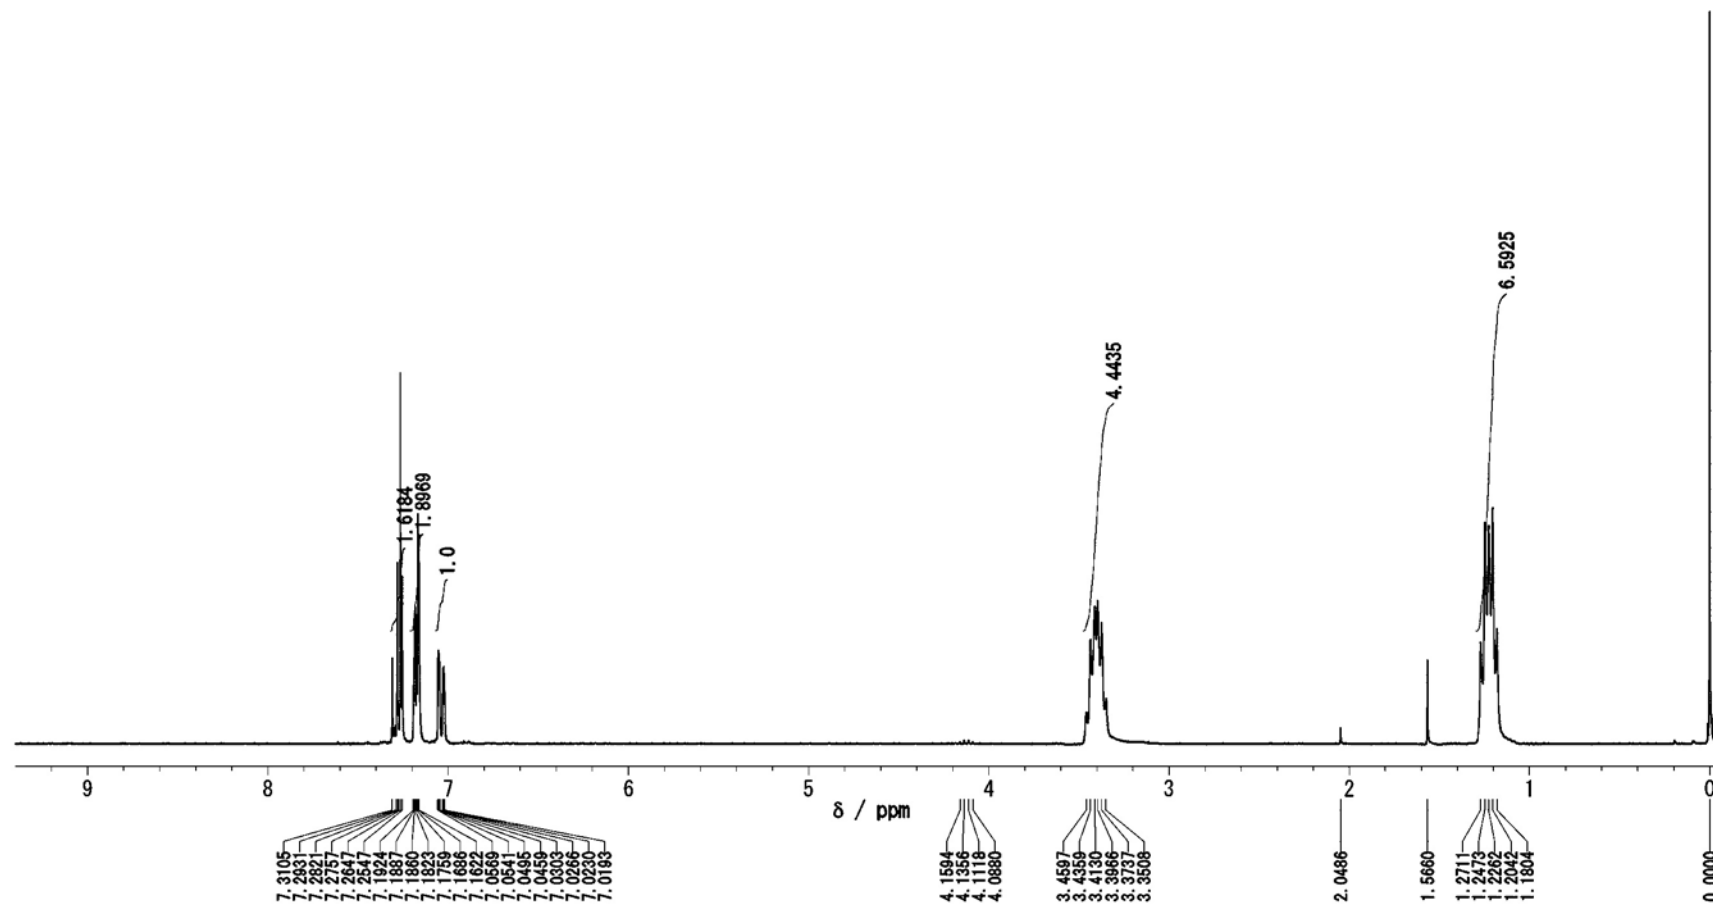

Original File: Mar 5 10  
 Date: Mar 5 10  
 Comment: C13 Standard Observe  
 Stick=none Tune=6.4 Match=0.4

ObsNuc: <sup>13</sup>C  
 ExMode: NON  
 ObsFreq: 75.43 MHz  
 ObsSet: 1.0 kHz  
 ObsFine: 996.3672 Hz  
 Point: 32768  
 Frequency (Span): 18761.73 Hz  
 Scan: 256  
 AcqTime: 1.4992 s  
 PD: 1.501 s  
 Pulse1: 6.0 μs  
 Temperature: 29.0 °C  
 Solvent: CDCl<sub>3</sub>  
 Reference: 77.0 ppm  
 Broad.Factor: 0.2863 Hz  
 RGain: 30  
 Printed: 2010/May/14 15:23:49  
 Operator:

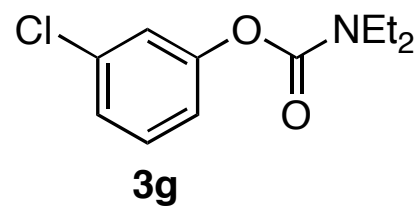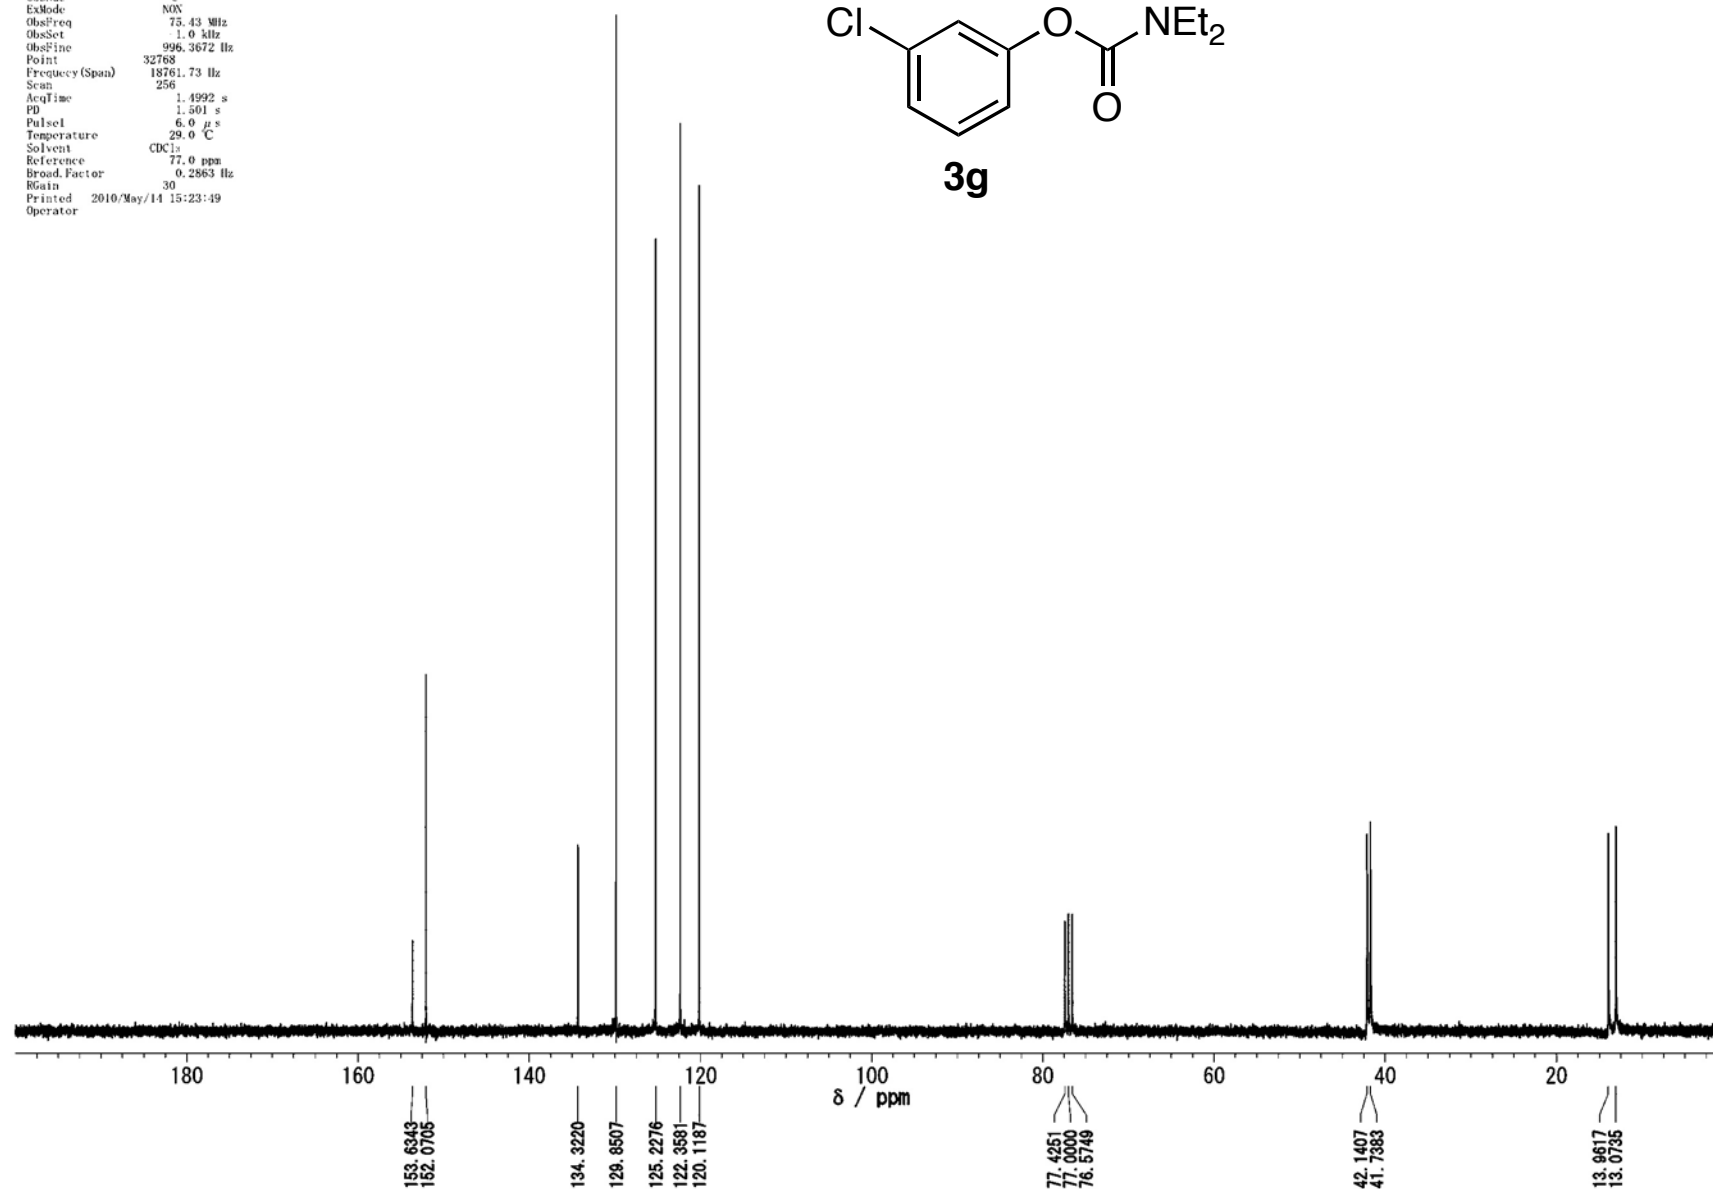

Original File:  
 Date Sep 26 09  
 Comment  
 STANDARD IN OBSERVE

ObsNuc <sup>1</sup>H  
 ExMode NON  
 ObsFreq 299.96 MHz  
 ObsSet 1.0 kHz  
 ObsFine 995.0047 Hz  
 Point 16384  
 Frequency (Span) 4500.45 Hz  
 Scan 16  
 AcqTime 3.4983 s  
 PD 1.502 s  
 Pulse 6.0  $\mu$ s  
 Temperature 29.0  $^{\circ}$ C  
 Solvent CDCl<sub>3</sub>  
 Reference 0.0 ppm  
 Broad Factor 0.1373 Hz  
 RGain 24  
 Printed 2010/Jun/24 14:34:31  
 Operator

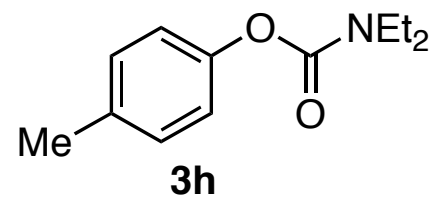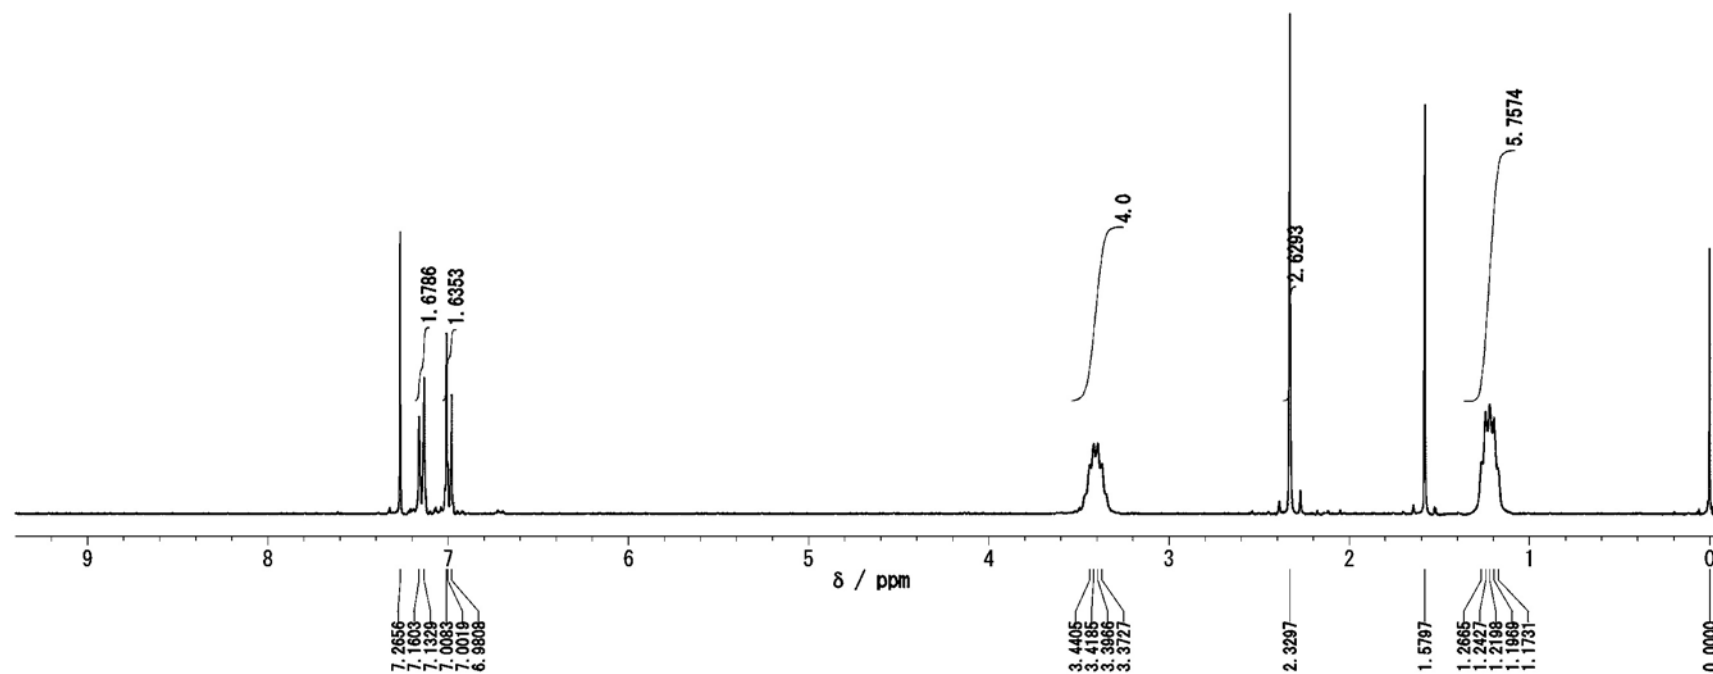

Original File: Mar 5 10  
 Date  
 Comment  
 C13 Standard Observe  
 Stick=none Tune=6.4 Match=0.4  
 ObsVac isC  
 ExMode NON  
 ObsFreq 75.43 MHz  
 ObsSet -1.0 kHz  
 ObsFine 996.3672 Hz  
 Point 32768  
 Frequency (Span) 18761.73 Hz  
 Scan 128  
 AcqTime 1.4992 s  
 PD 1.501 s  
 Pulsol 6.0  $\mu$ s  
 Temperature 29.0  $^{\circ}$ C  
 Solvent CDCl<sub>3</sub>  
 Reference 77.0 ppm  
 Broad.Factor 0.2863 Hz  
 RGain 30  
 Printed 2010/May/02 16:40:20  
 Operator

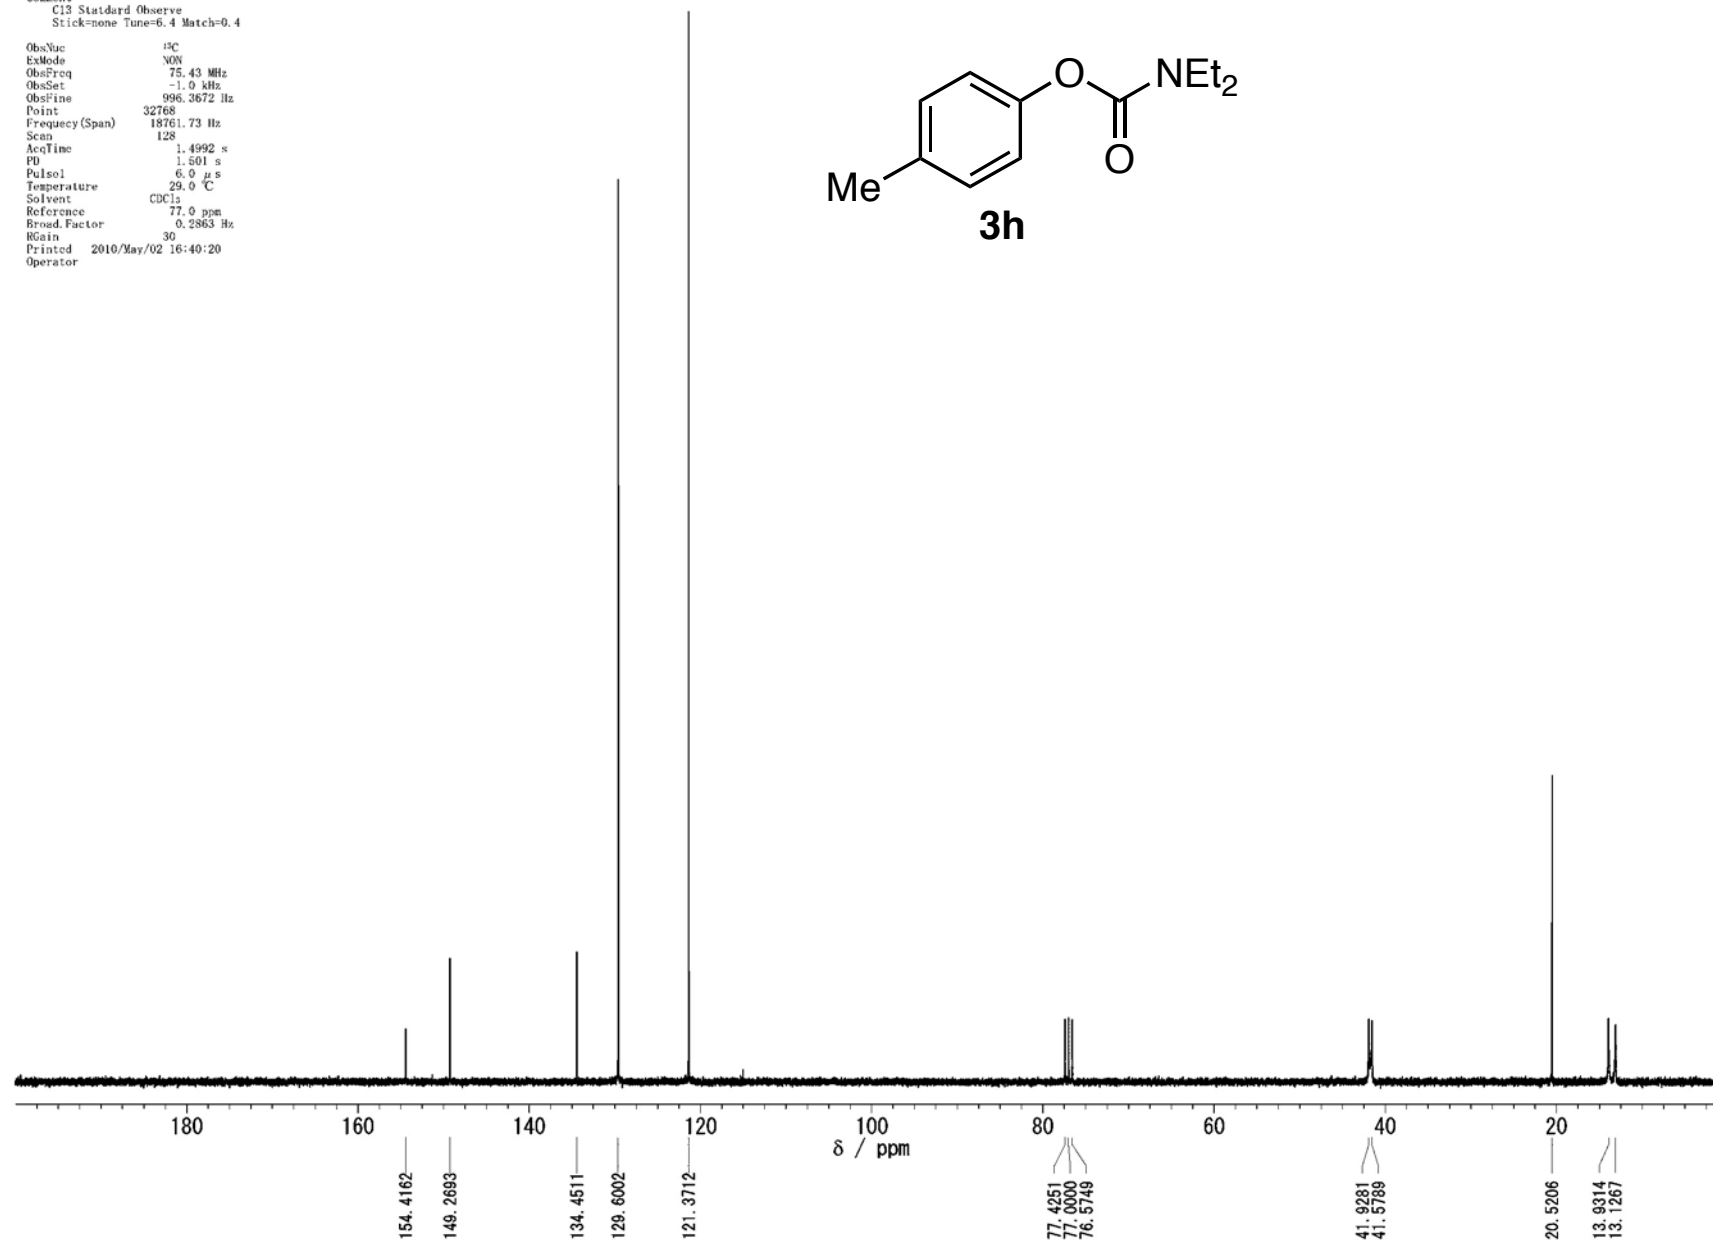

Original File:  
 Date Sep 30 09  
 Comment  
 STANDARD IN OBSERVE  
 ObsNuc <sup>1</sup>H  
 ExMode NON  
 ObsFreq 299.96 MHz  
 ObsSet 1.0 kHz  
 ObsPine 995.0047 Hz  
 Point 16384  
 Frequency (Span) 4500.45 Hz  
 Scan 16  
 AcqTime 3.4983 s  
 PD 1.502 s  
 Pulse 6.0  $\mu$ s  
 Temperature 29.0  $^{\circ}$ C  
 Solvent CDCl<sub>3</sub>  
 Reference 0.0 ppm  
 Broad Factor 0.1373 Hz  
 RGain 24  
 Printed 2010/May/14 16:01:13  
 Operator

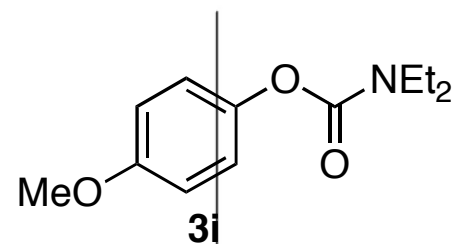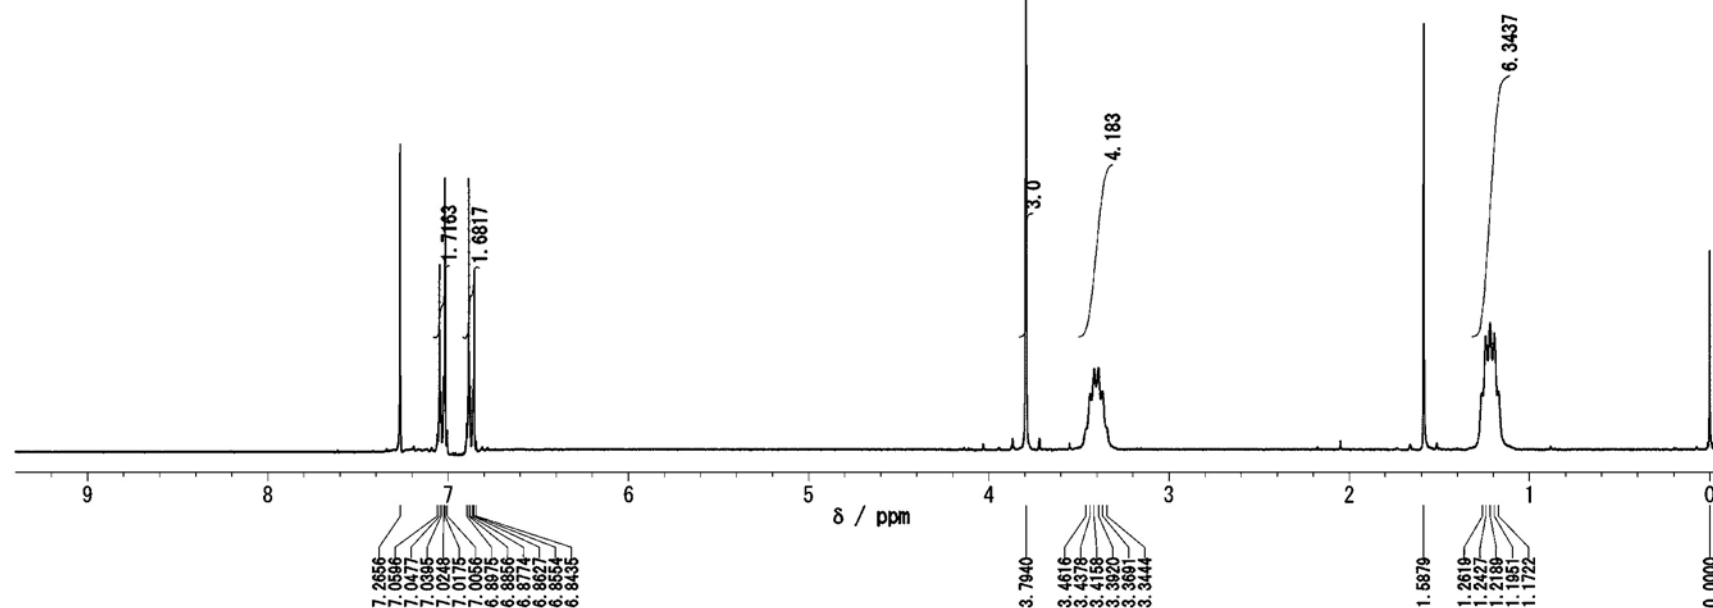



Date Mar 5 10  
 Comment C13 Standard Observe  
 Stick=noise Tune=6.4 Match=0.4  
 ObsNuc <sup>13</sup>C  
 ExMode NOX  
 ObsFreq 75.43 MHz  
 ObsSet -1.0 kHz  
 ObsFine 996.3672 Hz  
 Point 32768  
 Frequency (Span) 18761.73 Hz  
 Scan 128  
 AcqTime 1.4992 s  
 PD 1.501 s  
 Pulse 6.0  $\mu$ s  
 Temperature 29.0  $^{\circ}$ C  
 Solvent CDCl<sub>3</sub>  
 Reference 77.0 ppm  
 Broad Factor 0.25 Hz  
 RGain 30  
 Printed 2010/May/14 16:04:34  
 Operator

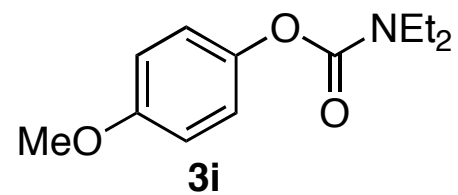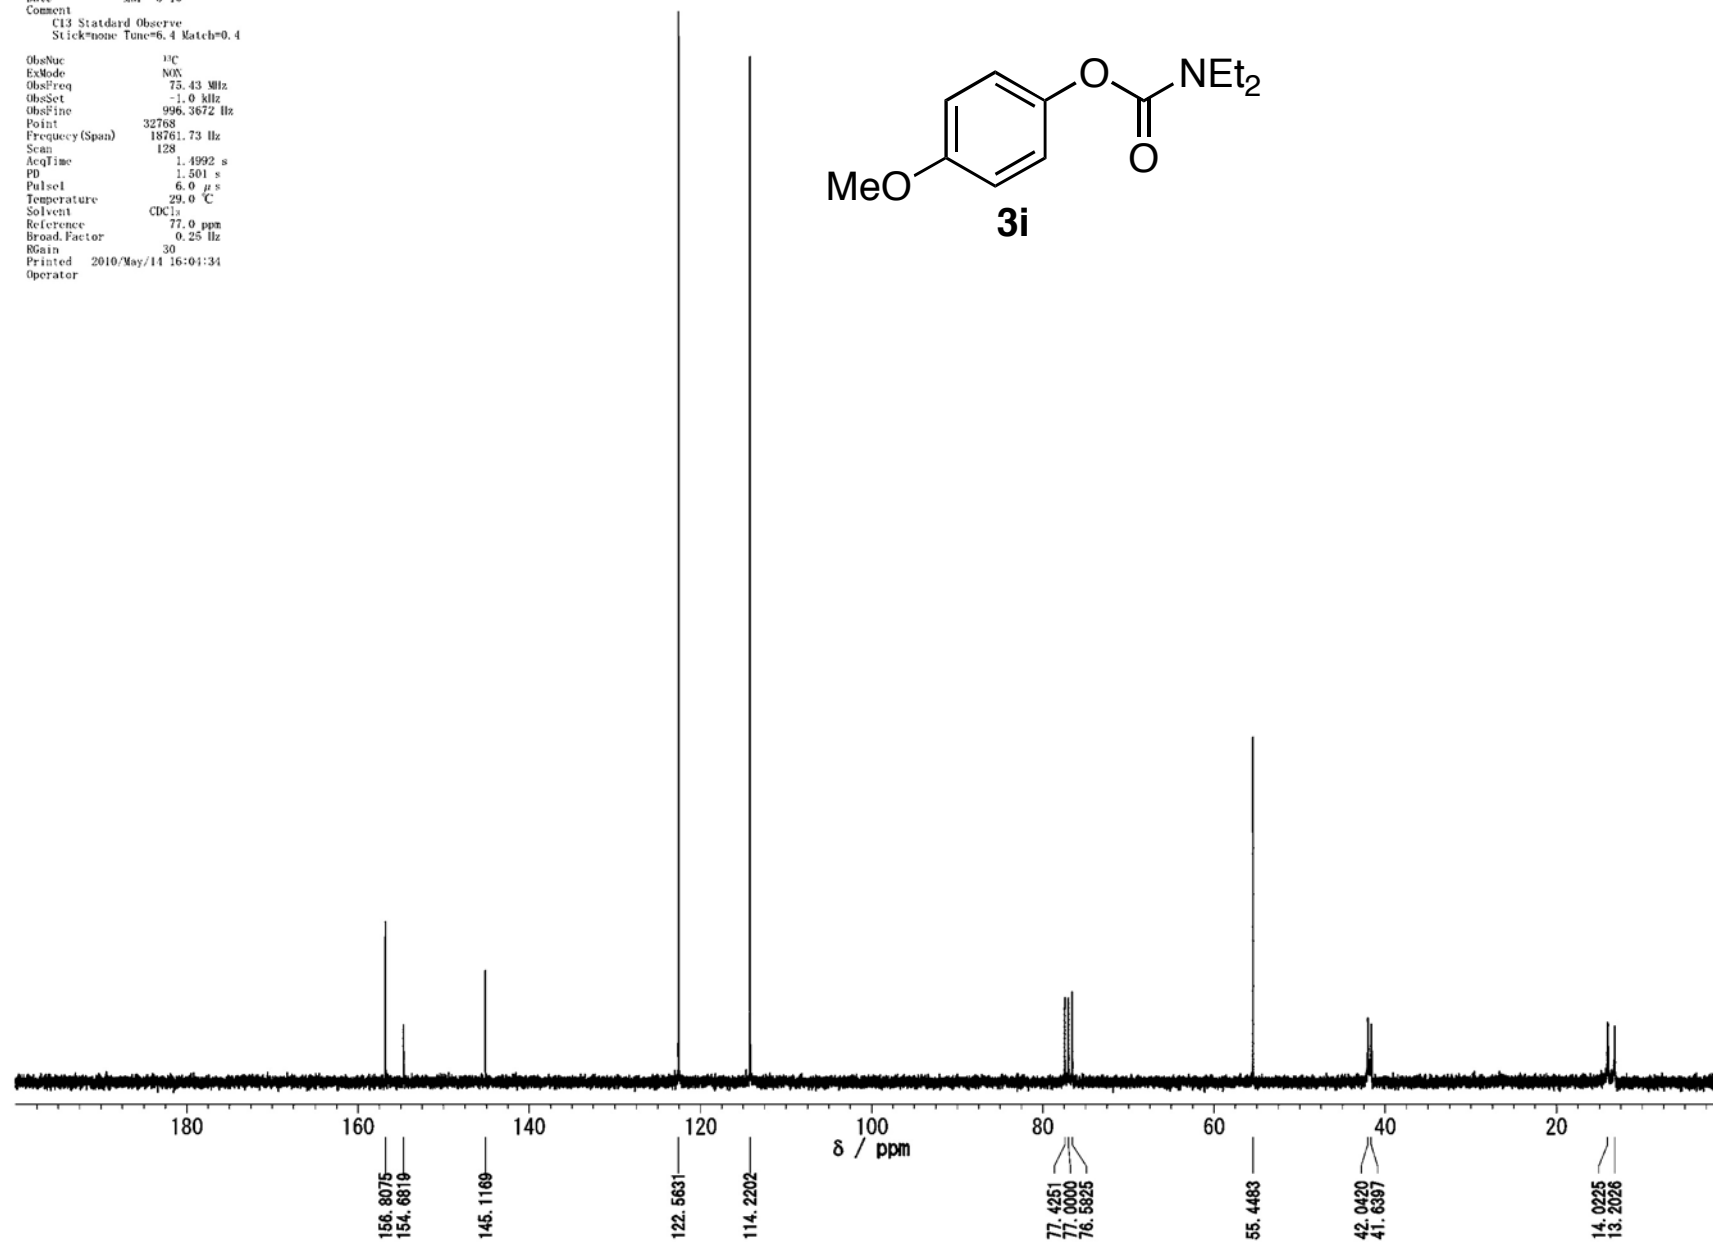

Original File:  
 Date Apr 7 10  
 Comment  
 STANDARD 1H OBSERVE

ObsVuc <sup>1</sup>H  
 ExMode NON  
 ObsFreq 299.96 MHz  
 ObsSet -1.0 kHz  
 ObsFine 995.0047 Hz  
 Point 16384  
 Frequency (Span) 4500.45 Hz  
 Scan 16  
 AcqTime 3.4983 s  
 PD 1.502 s  
 Pulsel 6.0  $\mu$ s  
 Temperature 29.0  $^{\circ}$ C  
 Solvent CDCl<sub>3</sub>  
 Reference 0.0 ppm  
 Broad Factor 0.1373 Hz  
 RGain 30  
 Printed 2010/May/02 16:41:56  
 Operator

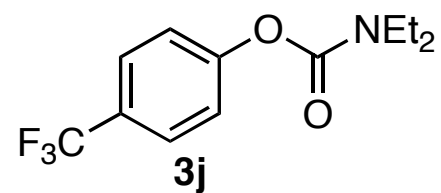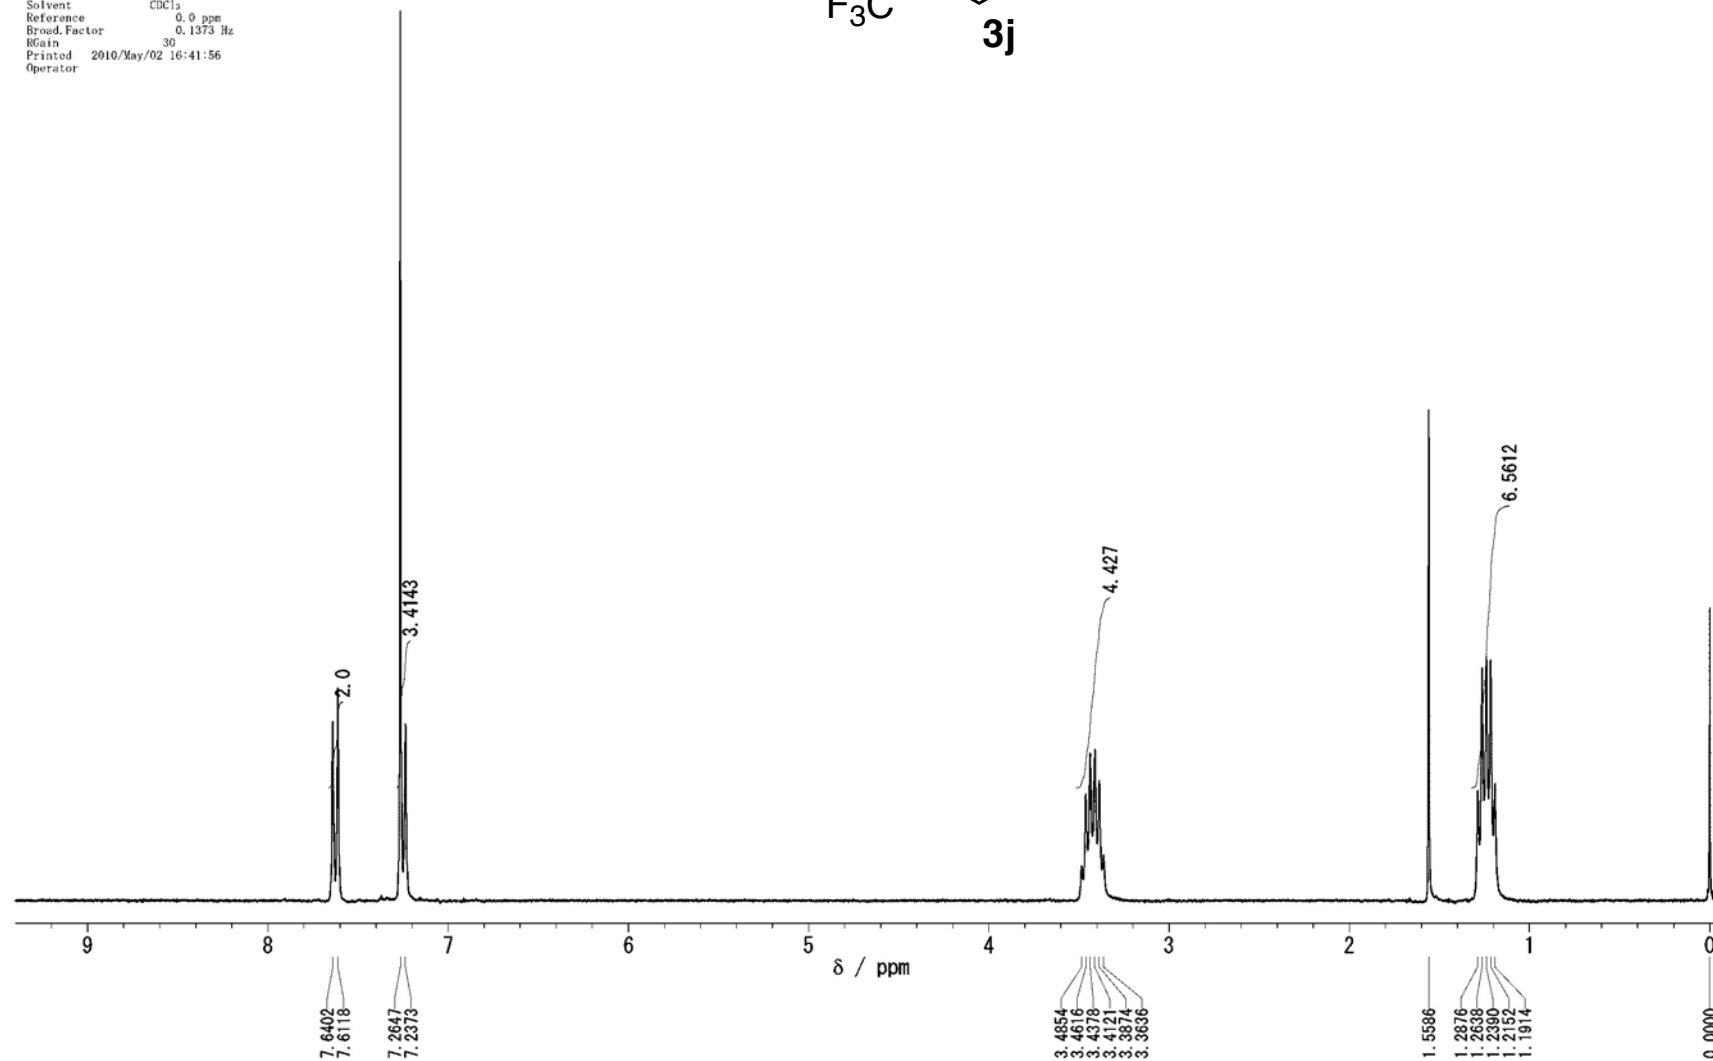

Original File:  
 Date Apr 28 10  
 Comment  
 C13 Standard Observe  
 Stick=none Tune=6.4 Match=0.4  
 ObsNuc <sup>13</sup>C  
 ExMode NON  
 ObsFreq 75.43 MHz  
 ObsSet 1.0 kHz  
 ObsFine 996.3672 Hz  
 Point 32768  
 Frequency (Span) 18761.73 Hz  
 Scan 256  
 AcqTime 1.4992 s  
 PD 1.501 s  
 Pulse 6.0  $\mu$ s  
 Temperature 29.0  $^{\circ}$ C  
 Solvent CDCl<sub>3</sub>  
 Reference 77.0 ppm  
 Broad Factor 0.2863 Hz  
 RGain 30  
 Printed 2010/Jun/24 14:36:53  
 Operator

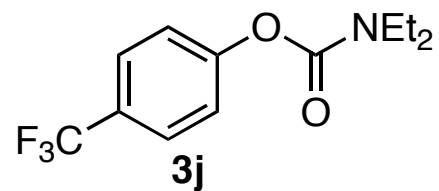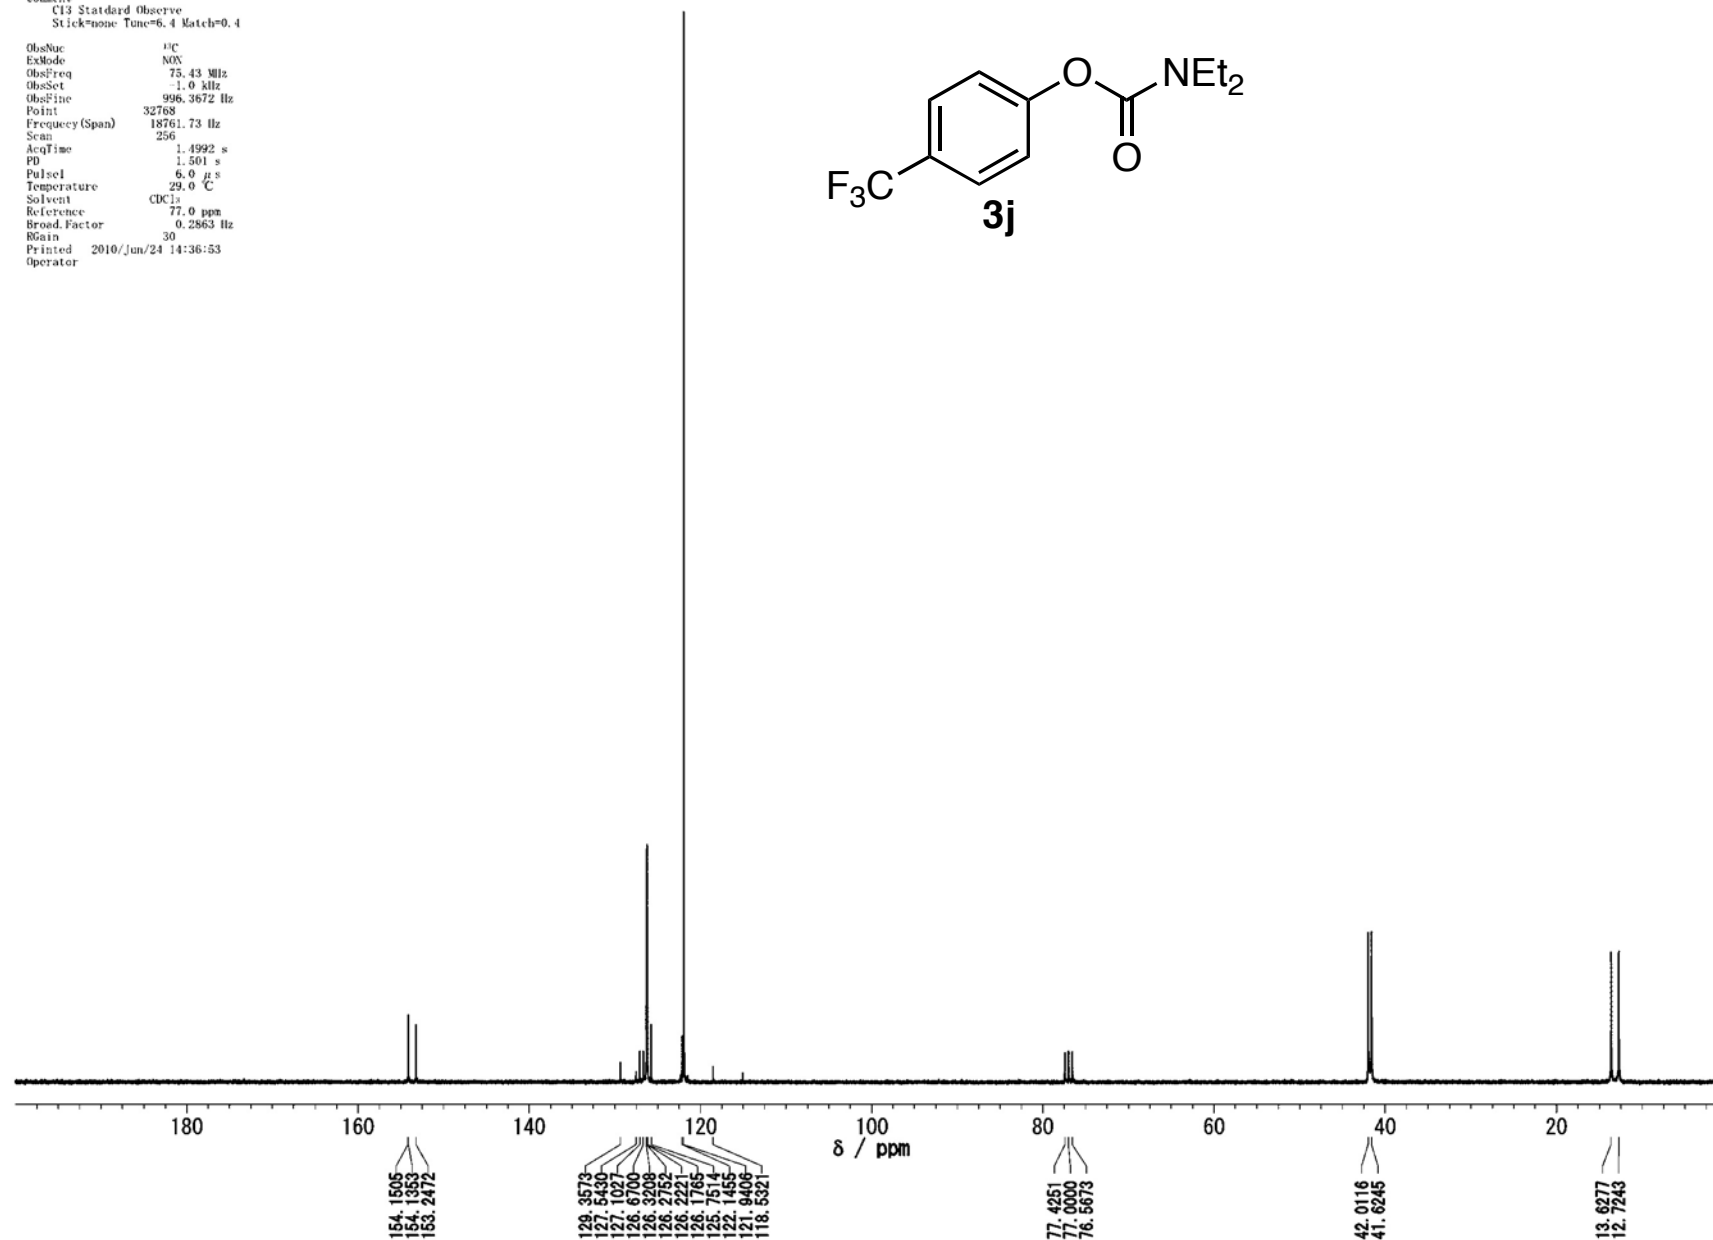

Original File:   
 Date Sep 10 09   
 Comment   
 STANDARD 1H OBSERVE   
 ObsVu: <sup>1</sup>H   
 ExMode: NON   
 ObsFraq: 299.96 MHz   
 ObsSet: -1.0 kHz   
 ObsFine: 995.0047 Hz   
 Point: 16384   
 Frequency (Span): 4500.45 Hz   
 Scan: 16   
 AcqTime: 3.4983 s   
 PD: 1.502 s   
 Pulse: 6.0  $\mu$ s   
 Temperature: 29.0  $^{\circ}$ C   
 Solvent: CDCl<sub>3</sub>   
 Reference: 0.0 ppm   
 Broad Factor: 0.1373 Hz   
 RGain: 24   
 Printed: 2010/May/02 16:45:25   
 Operator

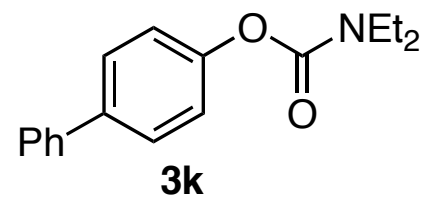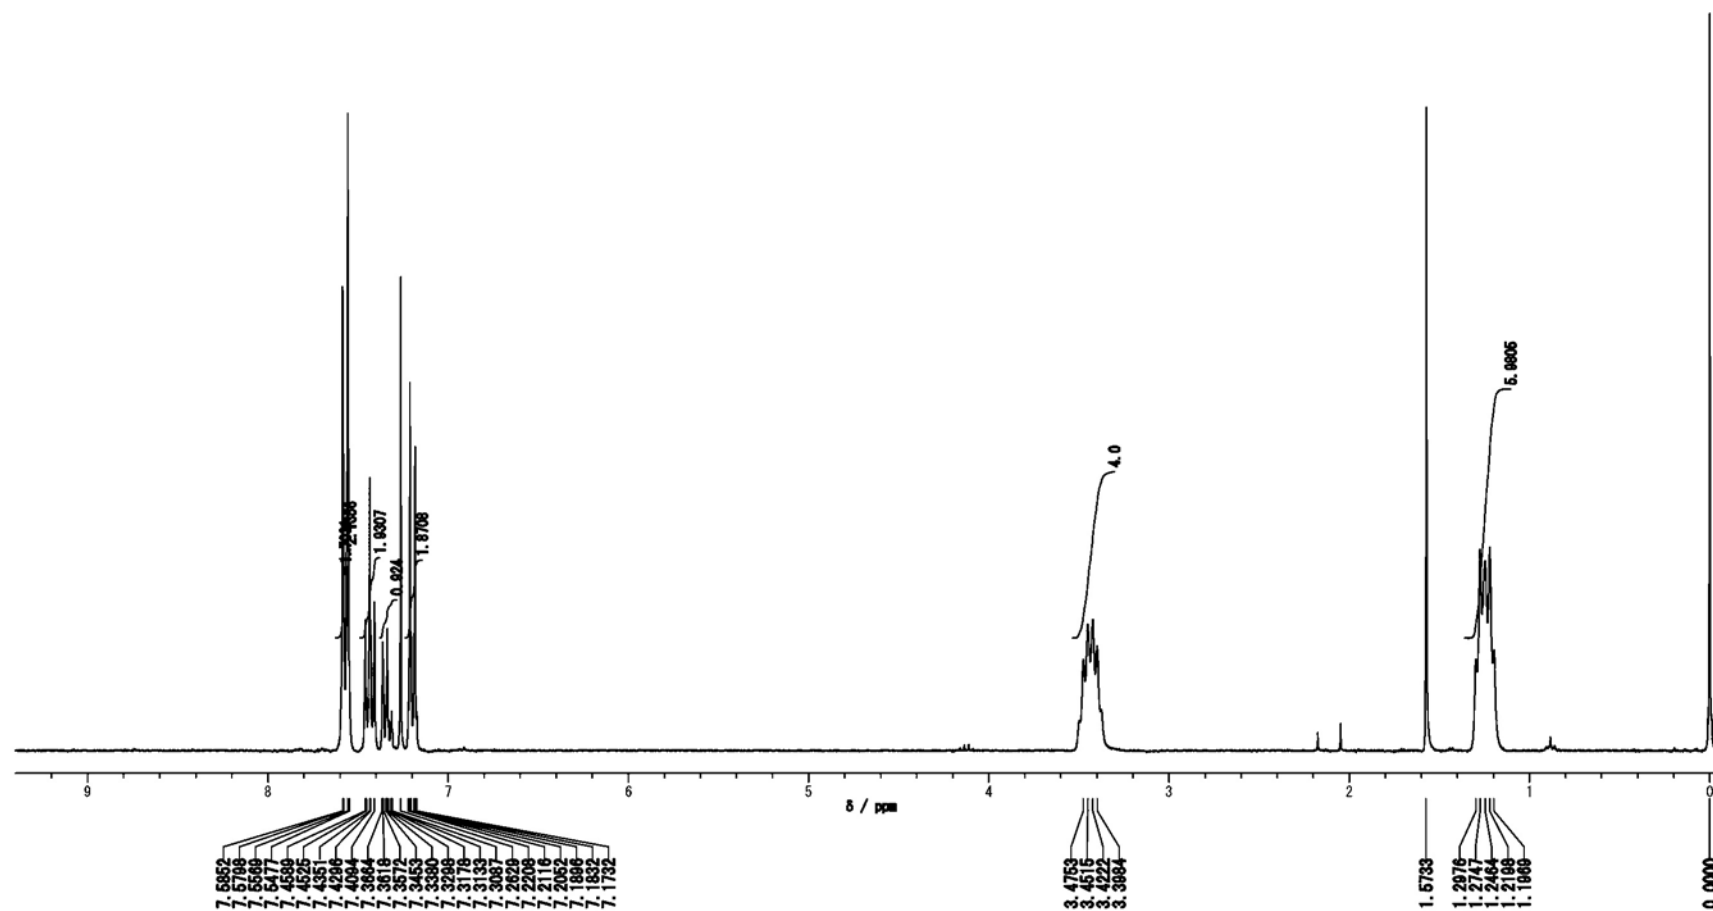

Original File:  
 Date Mar 6 10  
 Comment  
 C13 Standard Observe  
 Stick=none Tune=6.4 Match=0.4  
 ObsVac isC  
 ExMode NON  
 ObsFreq 75.43 MHz  
 ObsSet -1.0 kHz  
 ObsFine 996.3672 Hz  
 Point 32768  
 Frequency (Span) 18761.73 Hz  
 Scan 128  
 AcqTime 1.4992 s  
 PD 1.501 s  
 Pulse1 6.0  $\mu$ s  
 Temperature 29.0  $^{\circ}$ C  
 Solvent CDCl<sub>3</sub>  
 Reference 77.0 ppm  
 Broad Factor 0.2863 Hz  
 RGain 30  
 Printed 2010/May/02 16:46:56  
 Operator

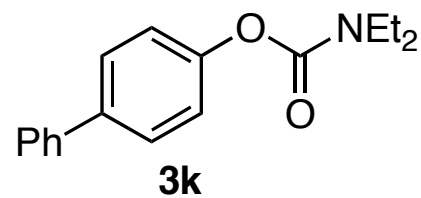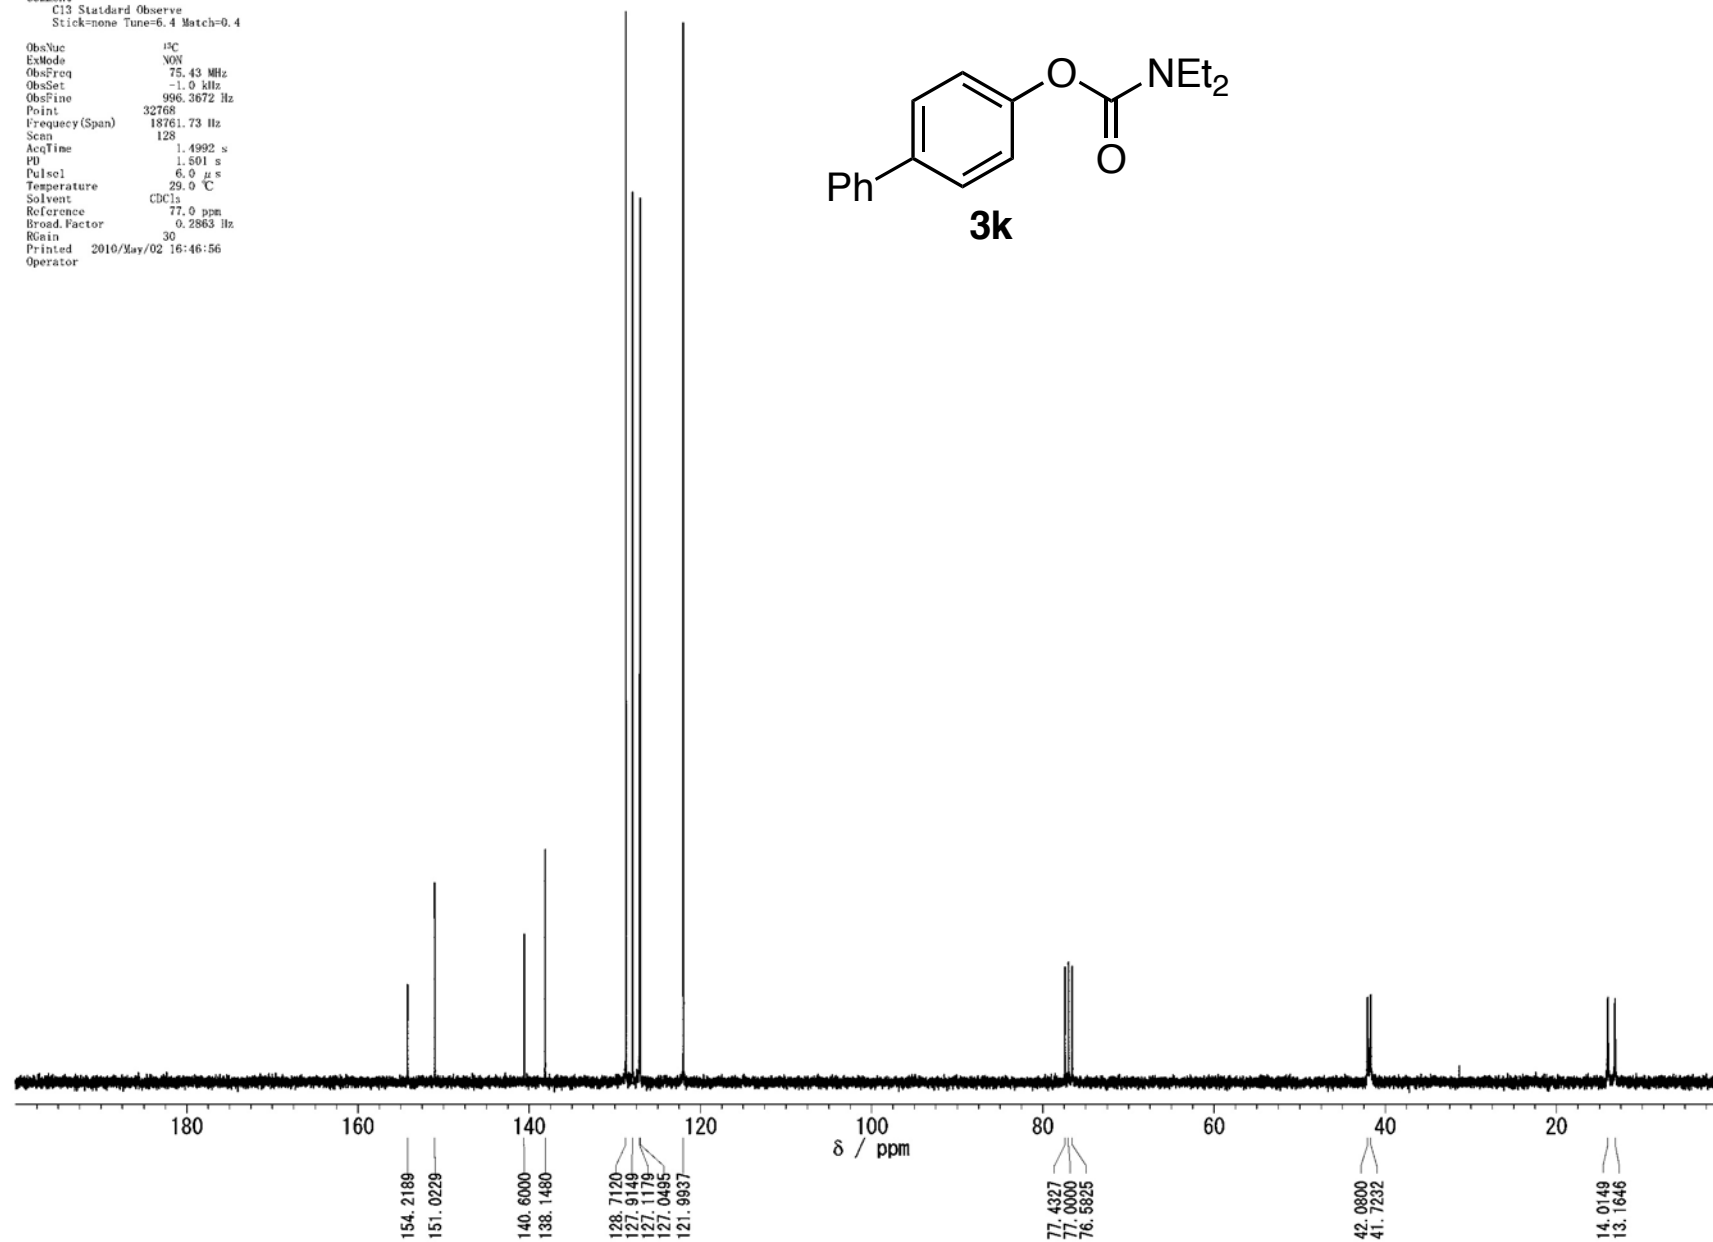

Original File:  
 Date Jun 6 09  
 Comment  
 STANDARD IN OBSERVE

ObsNuc <sup>1</sup>H  
 ExMode NON  
 ObsFreq 299.96 MHz  
 ObsSet 1.0 kHz  
 ObsPine 995.0047 Hz  
 Point 16384  
 Frequency (Span) 4500.45 Hz  
 Scan 16  
 AcqTime 3.4983 s  
 PD 1.502 s  
 Pulse 6.0  $\mu$ s  
 Temperature 29.0  $^{\circ}$ C  
 Solvent CDCl<sub>3</sub>  
 Reference 0.0 ppm  
 Broad Factor 0.1373 Hz  
 RGain 19  
 Printed 2010/May/14 15:02:58  
 Operator

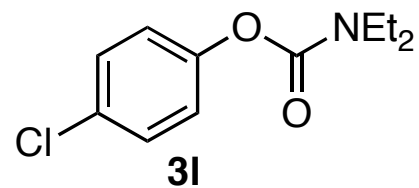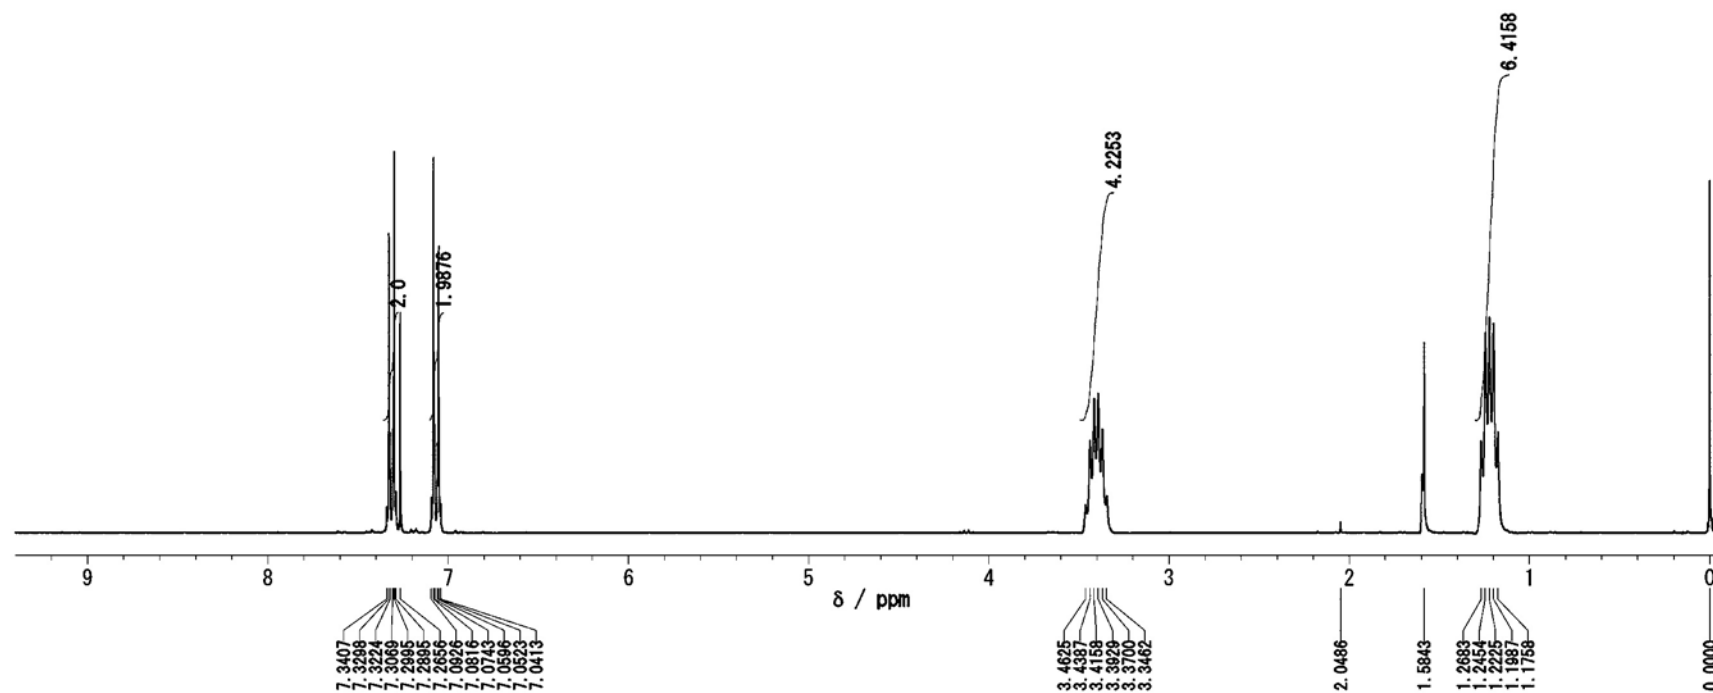

Original File: Mar 5 10  
 Date  
 Comment  
 C13 Standard Observe  
 Stick=none Tune=6.4 Match=0.4  
 ObsNuc <sup>13</sup>C  
 ExMode NON  
 ObsFreq 75.43 MHz  
 ObsSet 1.0 kHz  
 ObsFine 996.3672 Hz  
 Point 32768  
 Frequency (Span) 18761.73 Hz  
 Scan 192  
 AcqTime 1.4992 s  
 PD 1.501 s  
 Pulse 6.0 μs  
 Temperature 29.0 °C  
 Solvent CDCl<sub>3</sub>  
 Reference 77.0 ppm  
 Broad Factor 0.2863 Hz  
 RGain 30  
 Printed 2010/May/14 15:30:37  
 Operator

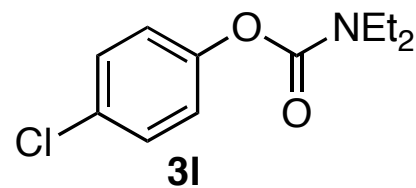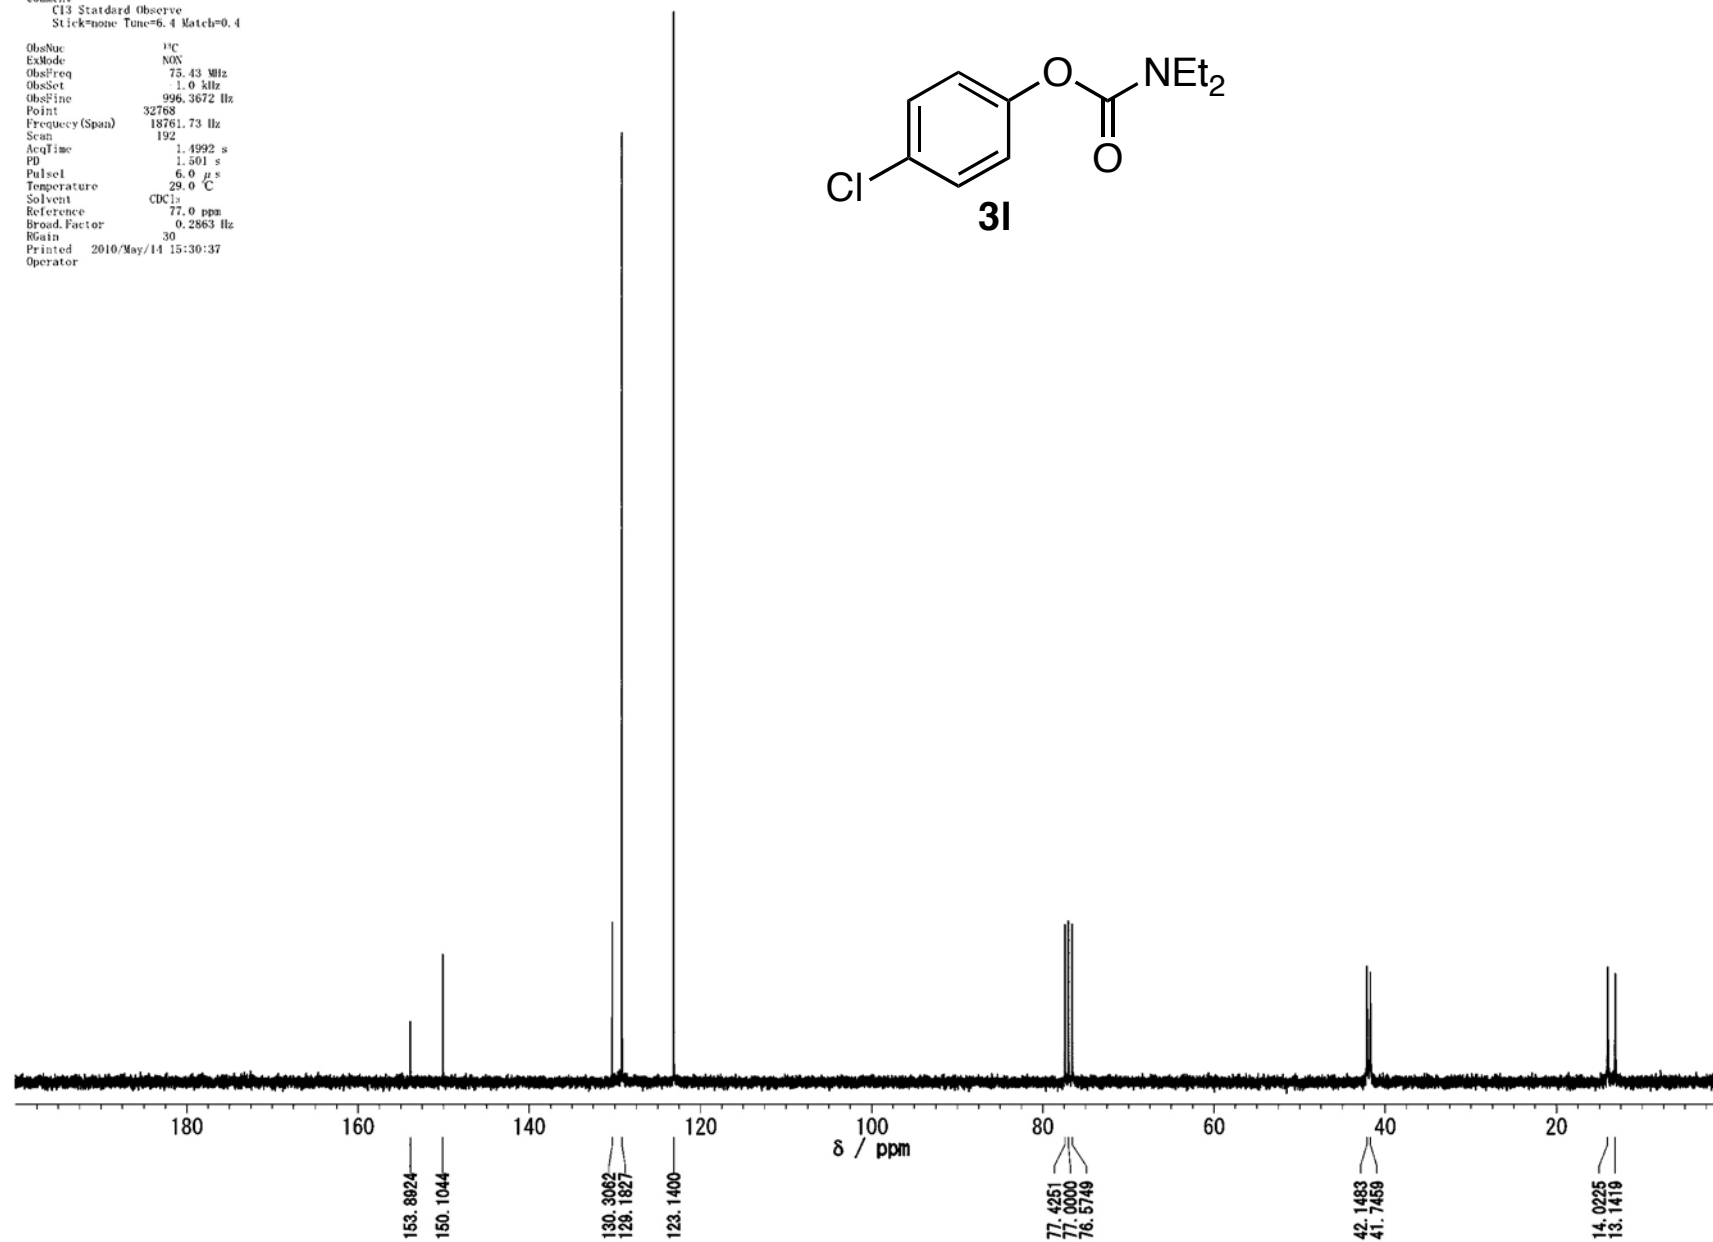

Original File:  
 Date Nov 13 09  
 Comment  
 STANDARD IN OBSERVE

ObsNuc <sup>1</sup>H  
 ExMode NON  
 ObsFreq 299.96 MHz  
 ObsSet 1.0 kHz  
 ObsPine 995.0047 Hz  
 Point 16384  
 Frequency (Span) 4500.45 Hz  
 Scan 16  
 AcqTime 3.4983 s  
 PD 1.502 s  
 Pulse 6.0  $\mu$ s  
 Temperature 29.0  $^{\circ}$ C  
 Solvent CDCl<sub>3</sub>  
 Reference 0.0 ppm  
 Broad Factor 0.1373 Hz  
 RGain 24  
 Printed 2010/May/14 15:07:19  
 Operator

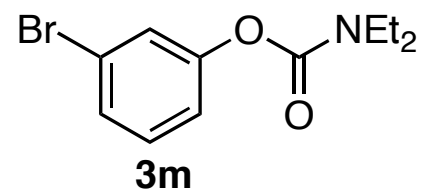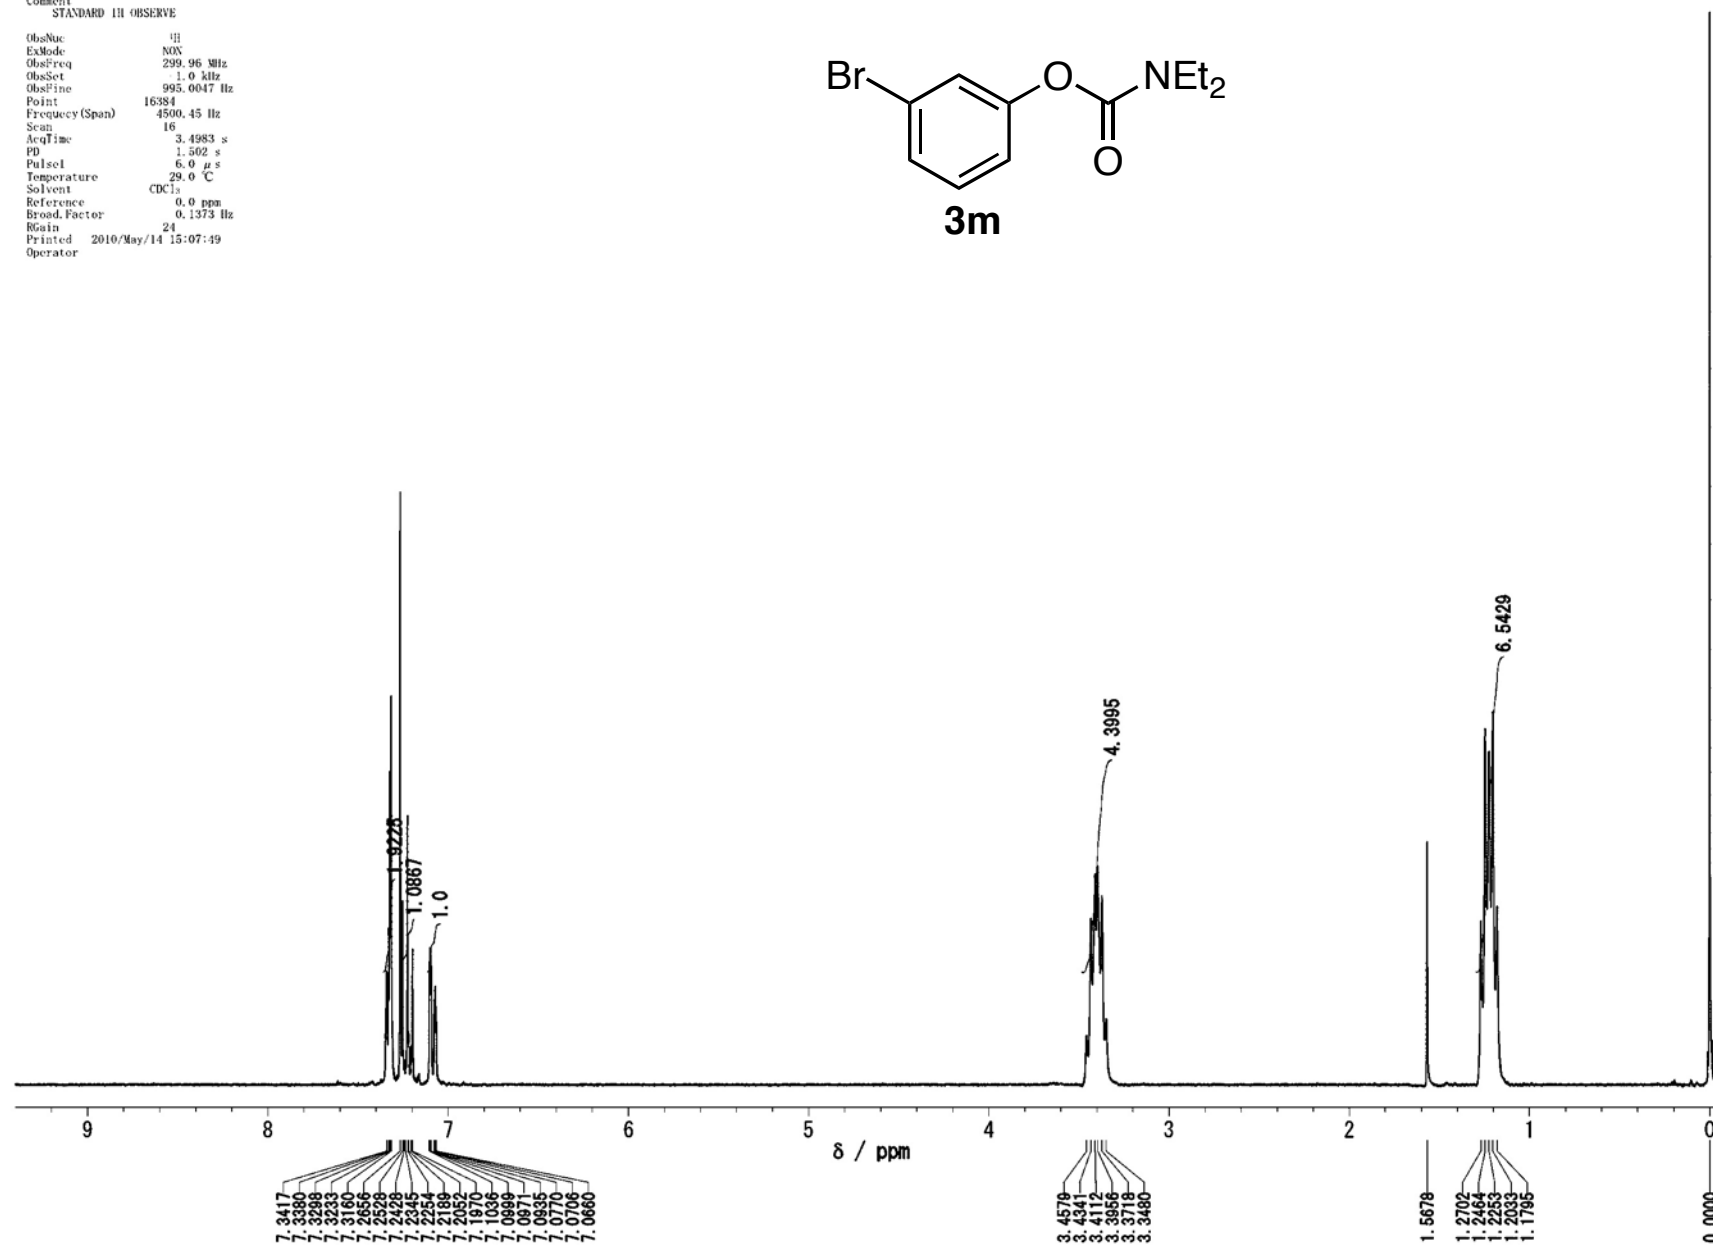



Original File: Mar 5 10  
 Date  
 Comment C13 Standard Observe  
 Stick=none Tune=6.4 Match=0.4  
 ObsNuc <sup>13</sup>C  
 ExMode NON  
 ObsFreq 75.43 MHz  
 ObsSet 1.0 kHz  
 ObsFine 996.3672 Hz  
 Point 32768  
 Frequency (Span) 18761.73 Hz  
 Scan 128  
 AcqTime 1.4992 s  
 PD 1.501 s  
 Pulse 6.0 μs  
 Temperature 29.0 °C  
 Solvent CDCl<sub>3</sub>  
 Reference 77.0 ppm  
 Broad.Factor 0.2863 Hz  
 RGain 30  
 Printed 2010/May/14 15:32:38  
 Operator

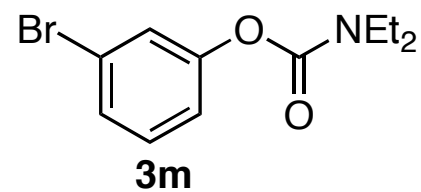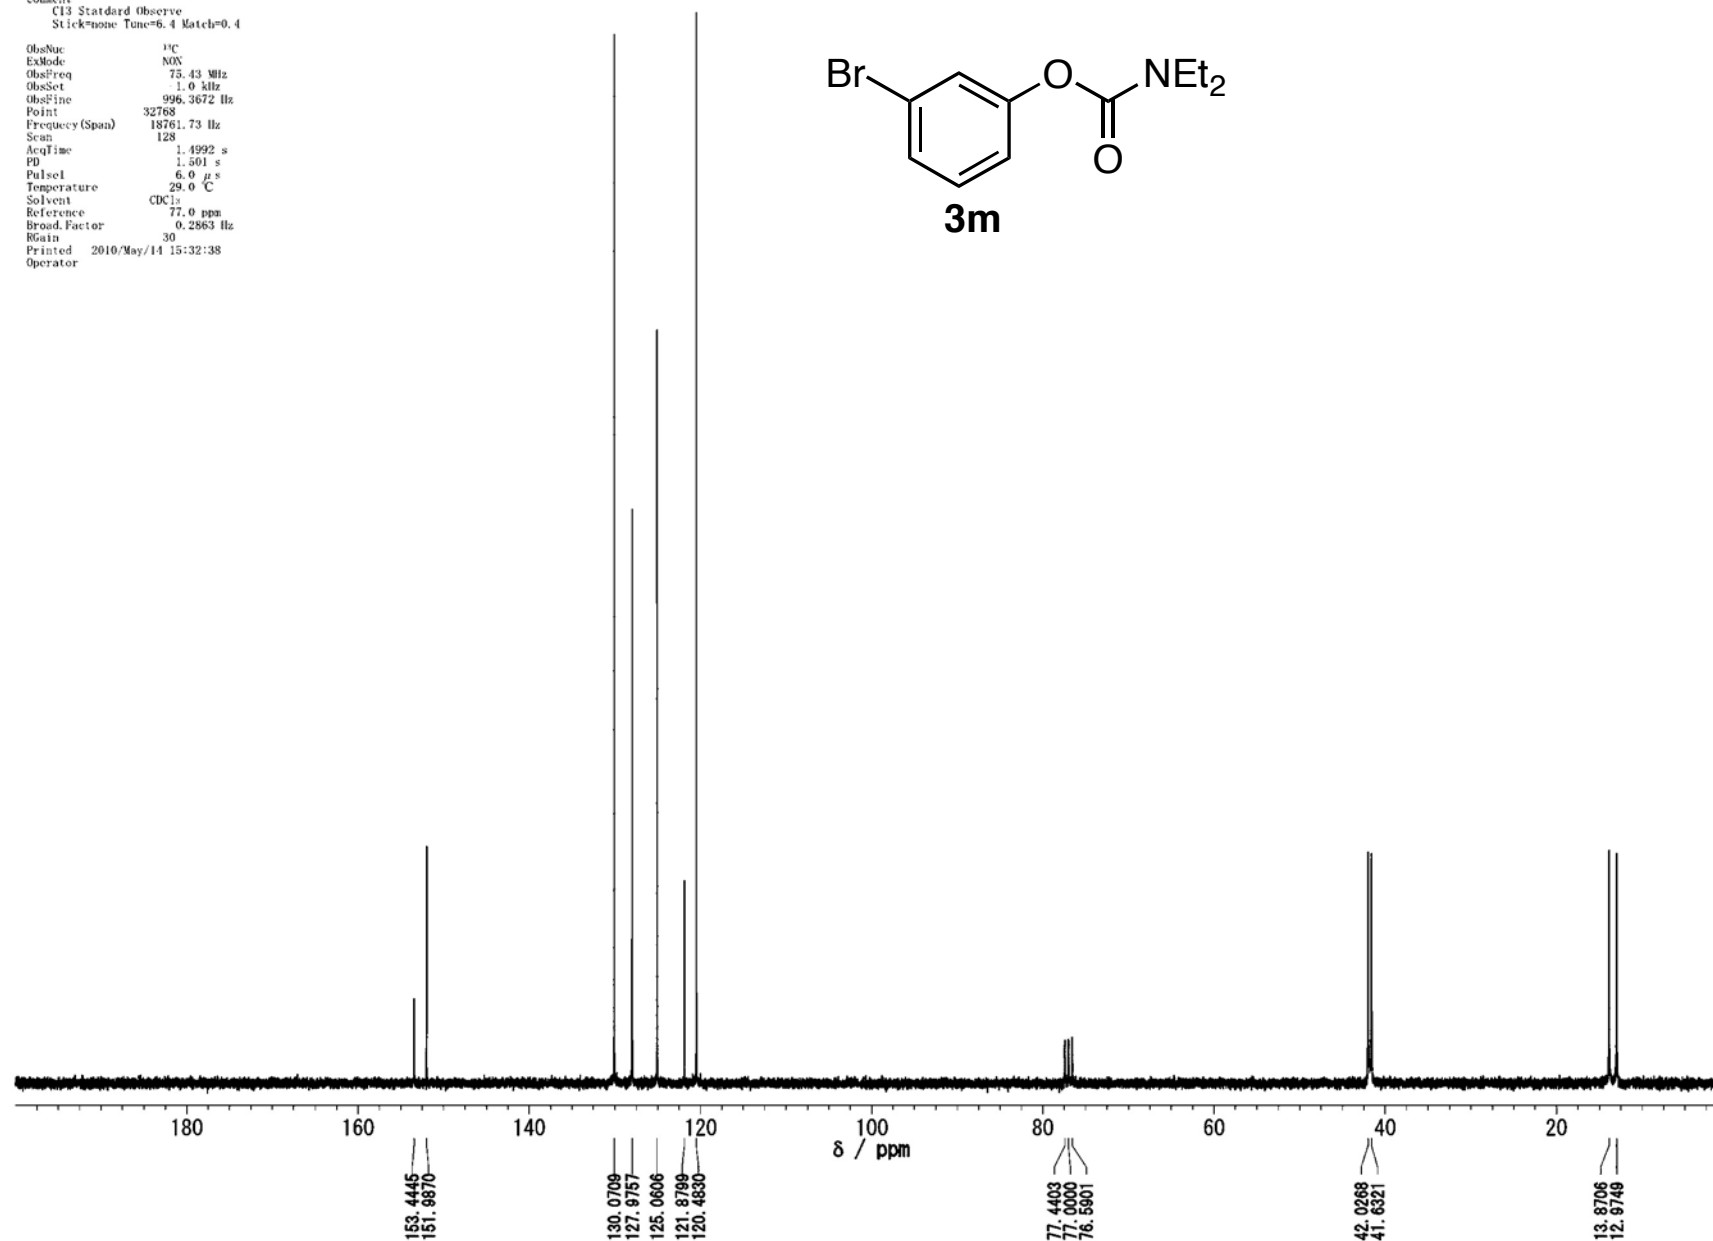

Original File:   
 Date Jun 18 09   
 Comment STANDARD IN OBSERVE   
 ObsNuc  $^1\text{H}$    
 ExMode NON   
 ObsFreq 299.96 MHz   
 ObsSet 1.0 kHz   
 ObsFine 995.0047 Hz   
 Point 16384   
 Frequency (Span) 4500.45 Hz   
 Scan 16   
 AcqTime 3.4983 s   
 PD 1.502 s   
 Pulse 6.0  $\mu\text{s}$    
 Temperature 29.0  $^{\circ}\text{C}$    
 Solvent  $\text{CDCl}_3$    
 Reference 0.0 ppm   
 Broad Factor 0.1373 Hz   
 RGain 28   
 Printed 2010/Jun/23 10:03:15   
 Operator

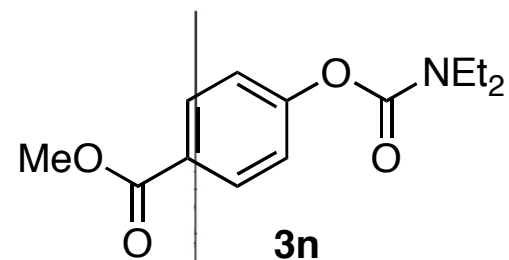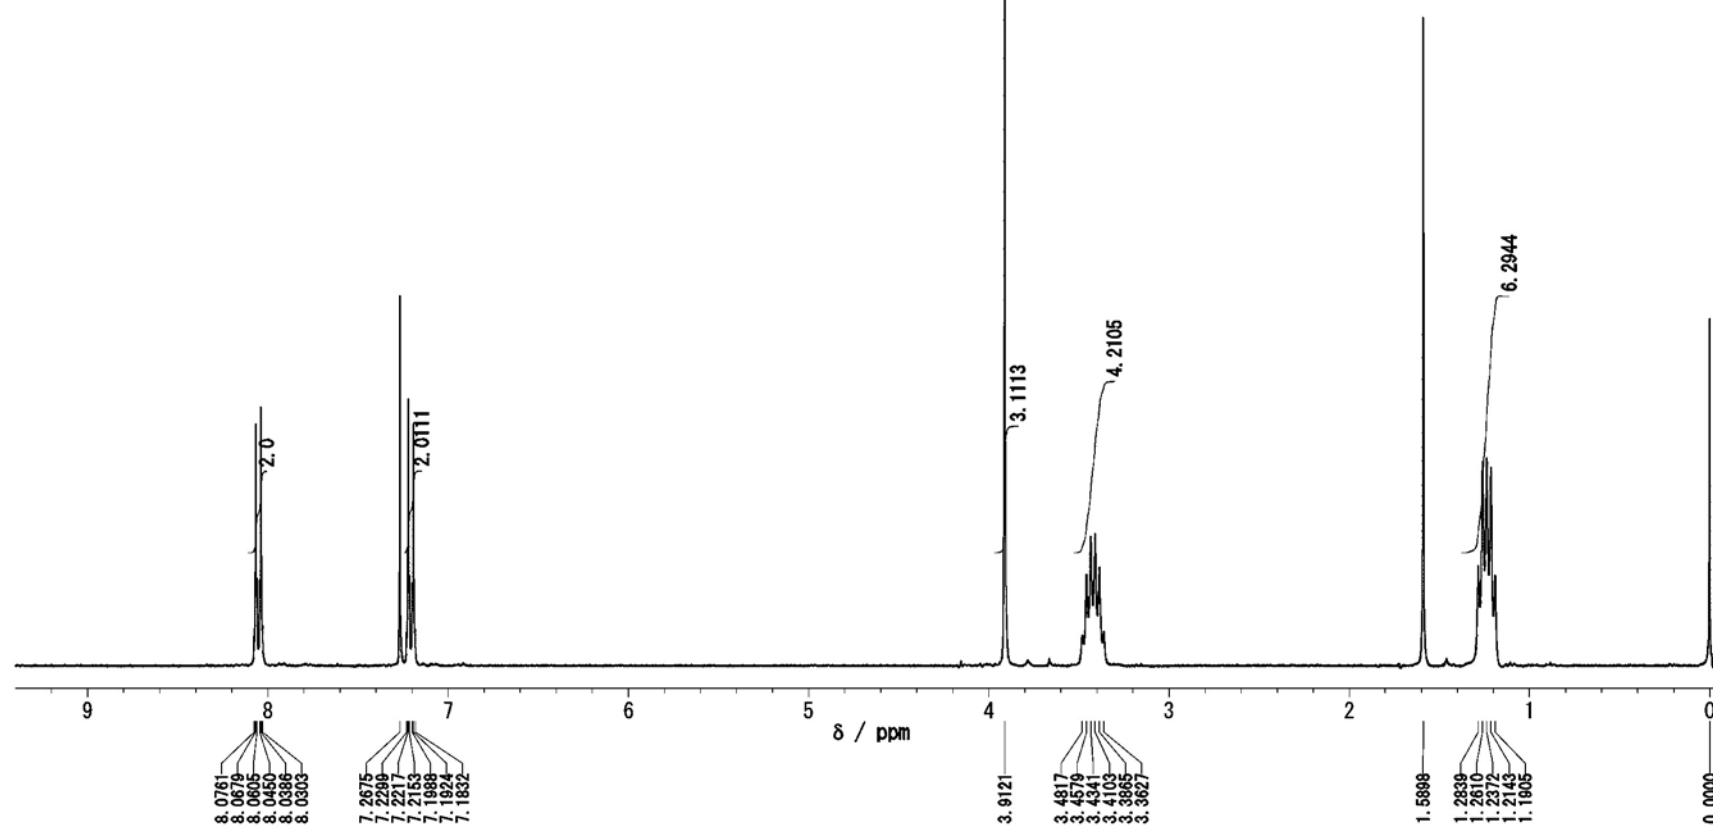

Original File:  
 Date Jun 22 10  
 Comment  
 C13 Standard Observe  
 Stick=none Tunc=6.4 Match=0.4  
 ObsNuc <sup>13</sup>C  
 ExMode NON  
 ObsFreq 75.43 MHz  
 ObsSet 1.0 kHz  
 ObsFine 996.3672 Hz  
 Point 32768  
 Frequency (Span) 18761.73 Hz  
 Scan 64  
 AcqTime 1.4992 s  
 PD 1.501 s  
 Pulse 6.0  $\mu$ s  
 Temperature 29.0  $^{\circ}$ C  
 Solvent CDCl<sub>3</sub>  
 Reference 77.0 ppm  
 Broad Factor 0.2863 Hz  
 RGain 30  
 Printed 2010/Jun/23 10:05:57  
 Operator

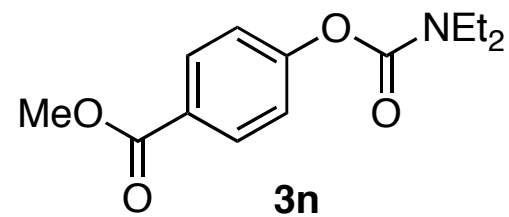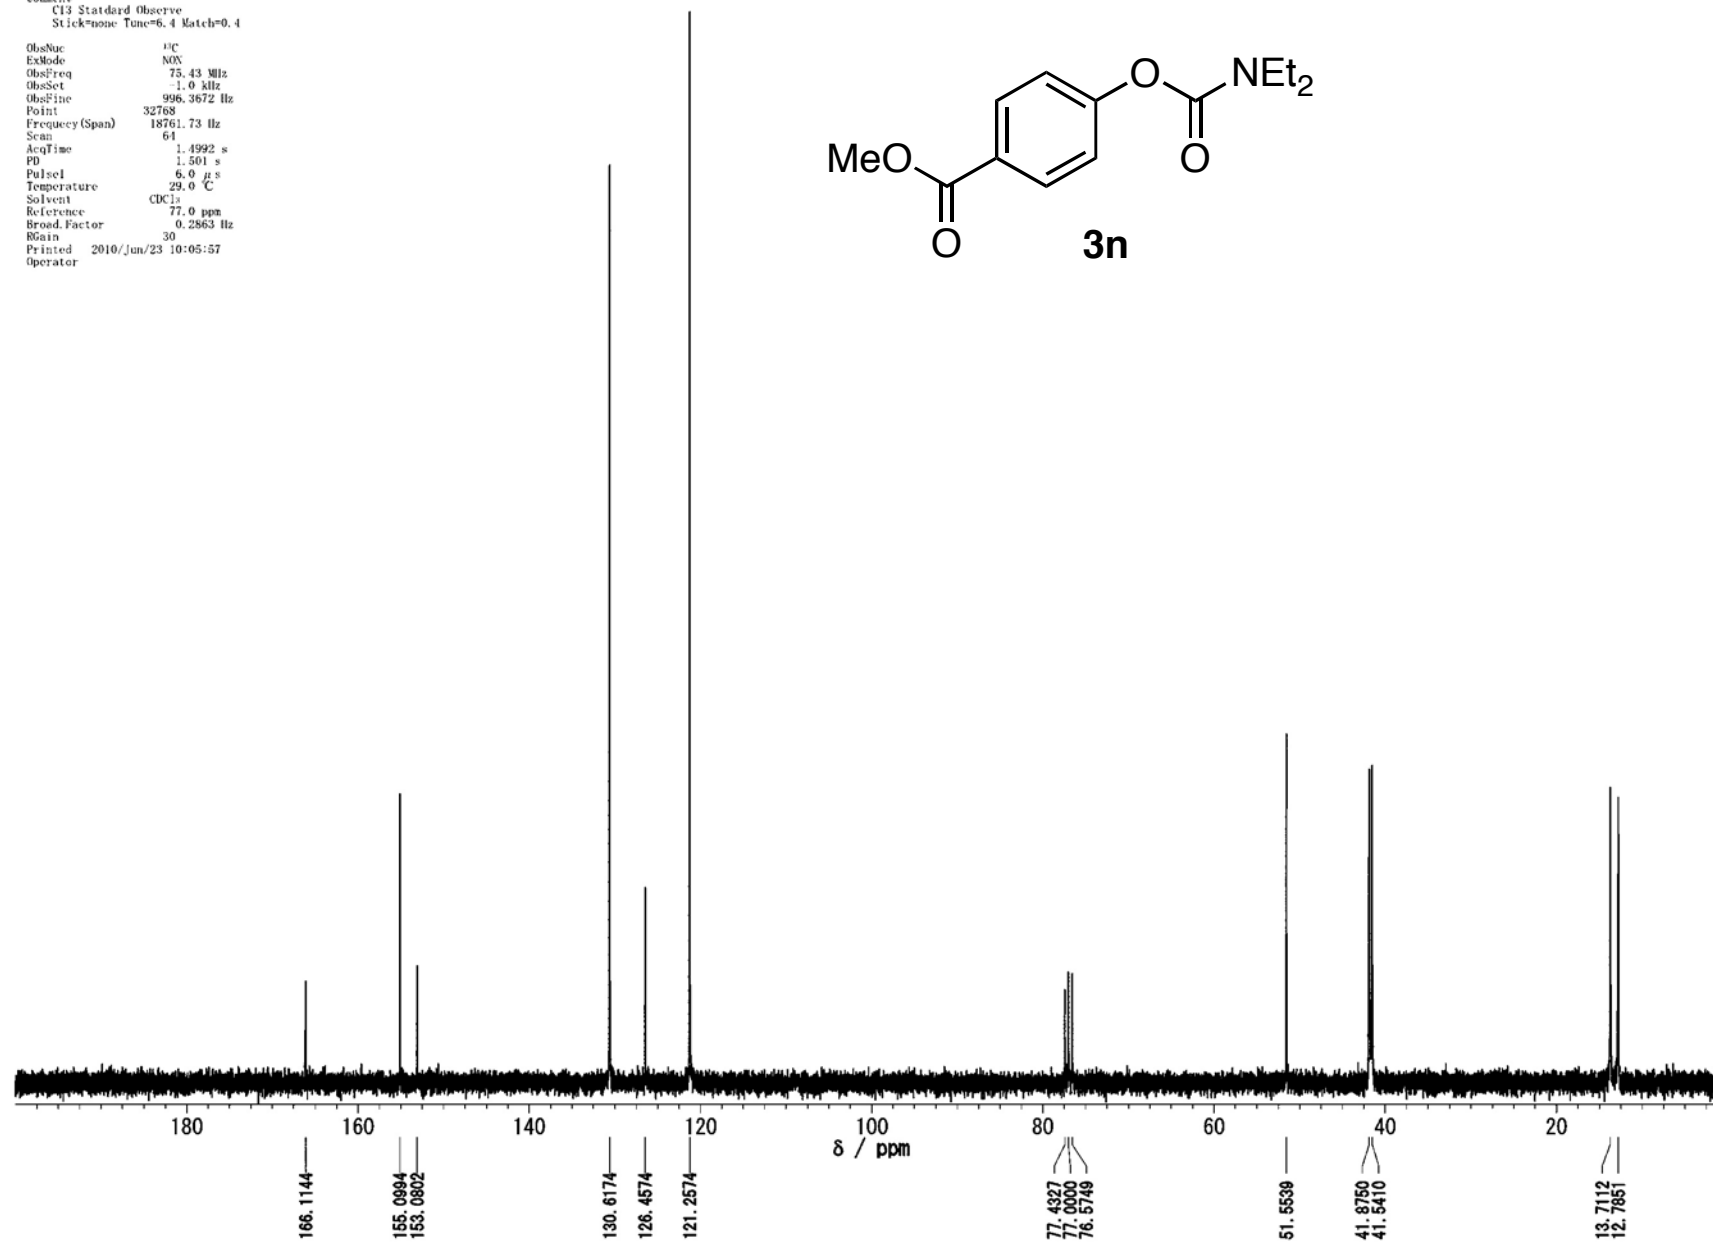

Original File:  
 Date Dec 16 09  
 Comment  
 STANDARD 1H OBSERVE

ObsVuc <sup>1</sup>H  
 ExMode NON  
 ObsFreq 299.96 MHz  
 ObsSet -1.0 kHz  
 ObsFine 995.0047 Hz  
 Point 16384  
 Frequency (Span) 4500.45 Hz  
 Scan 16  
 AcqTime 3.4983 s  
 PD 1.502 s  
 Pulsel 6.0  $\mu$ s  
 Temperature 29.0  $^{\circ}$ C  
 Solvent CDCl<sub>3</sub>  
 Reference 0.0 ppm  
 Broad Factor 0.1373 Hz  
 RGain 26  
 Printed 2010/May/02 16:49:41  
 Operator

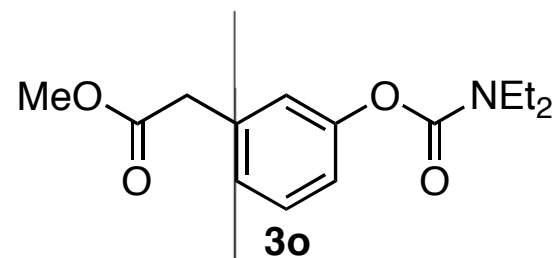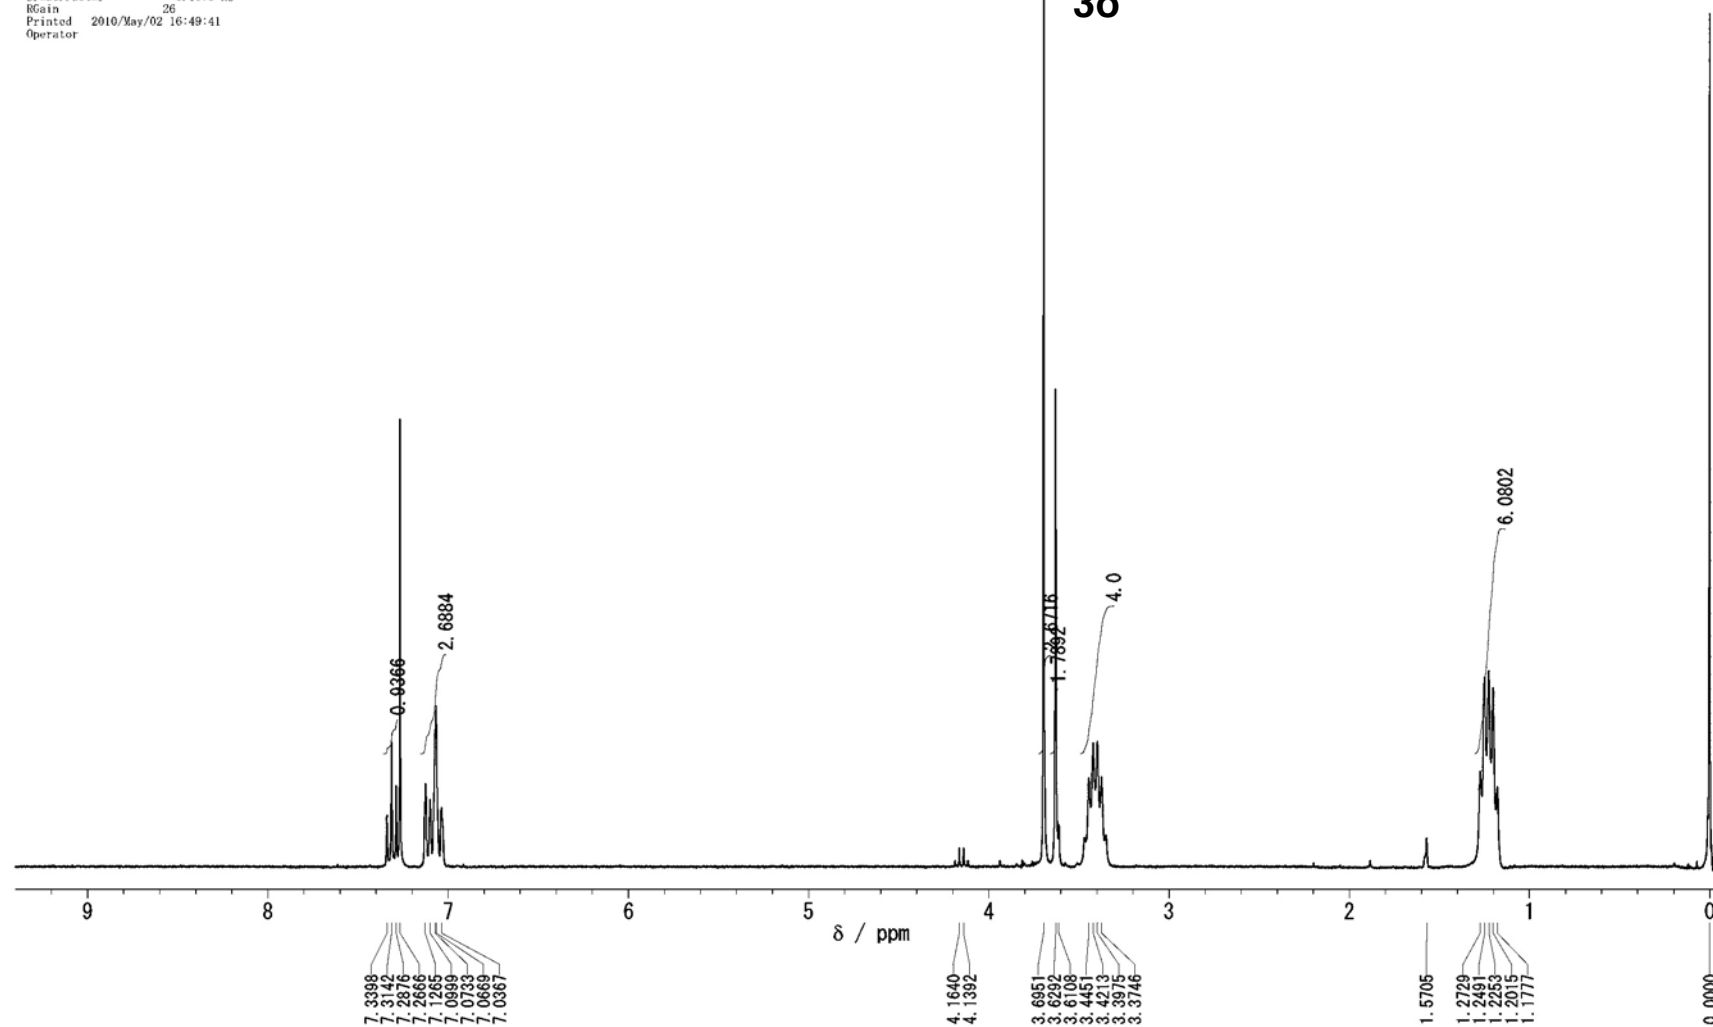

Original File:  
 Date Mar 6 10  
 Comment  
 C13 Standard Observe  
 Stick=none Tune=6.4 Match=0.4  
 ObsVac isC  
 ExMode NON  
 ObsFreq 75.43 MHz  
 ObsSet -1.0 kHz  
 ObsFine 996.3672 Hz  
 Point 32768  
 Frequency (Span) 18761.73 Hz  
 Scan 128  
 AcqTime 1.4992 s  
 PD 1.501 s  
 Pulse1 6.0  $\mu$ s  
 Temperature 29.0  $^{\circ}$ C  
 Solvent CDCl<sub>3</sub>  
 Reference 77.0 ppm  
 Broad Factor 0.2863 Hz  
 RGain 30  
 Printed 2010/May/02 16:51:51  
 Operator

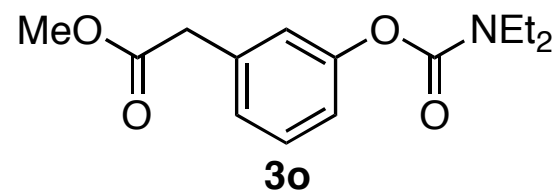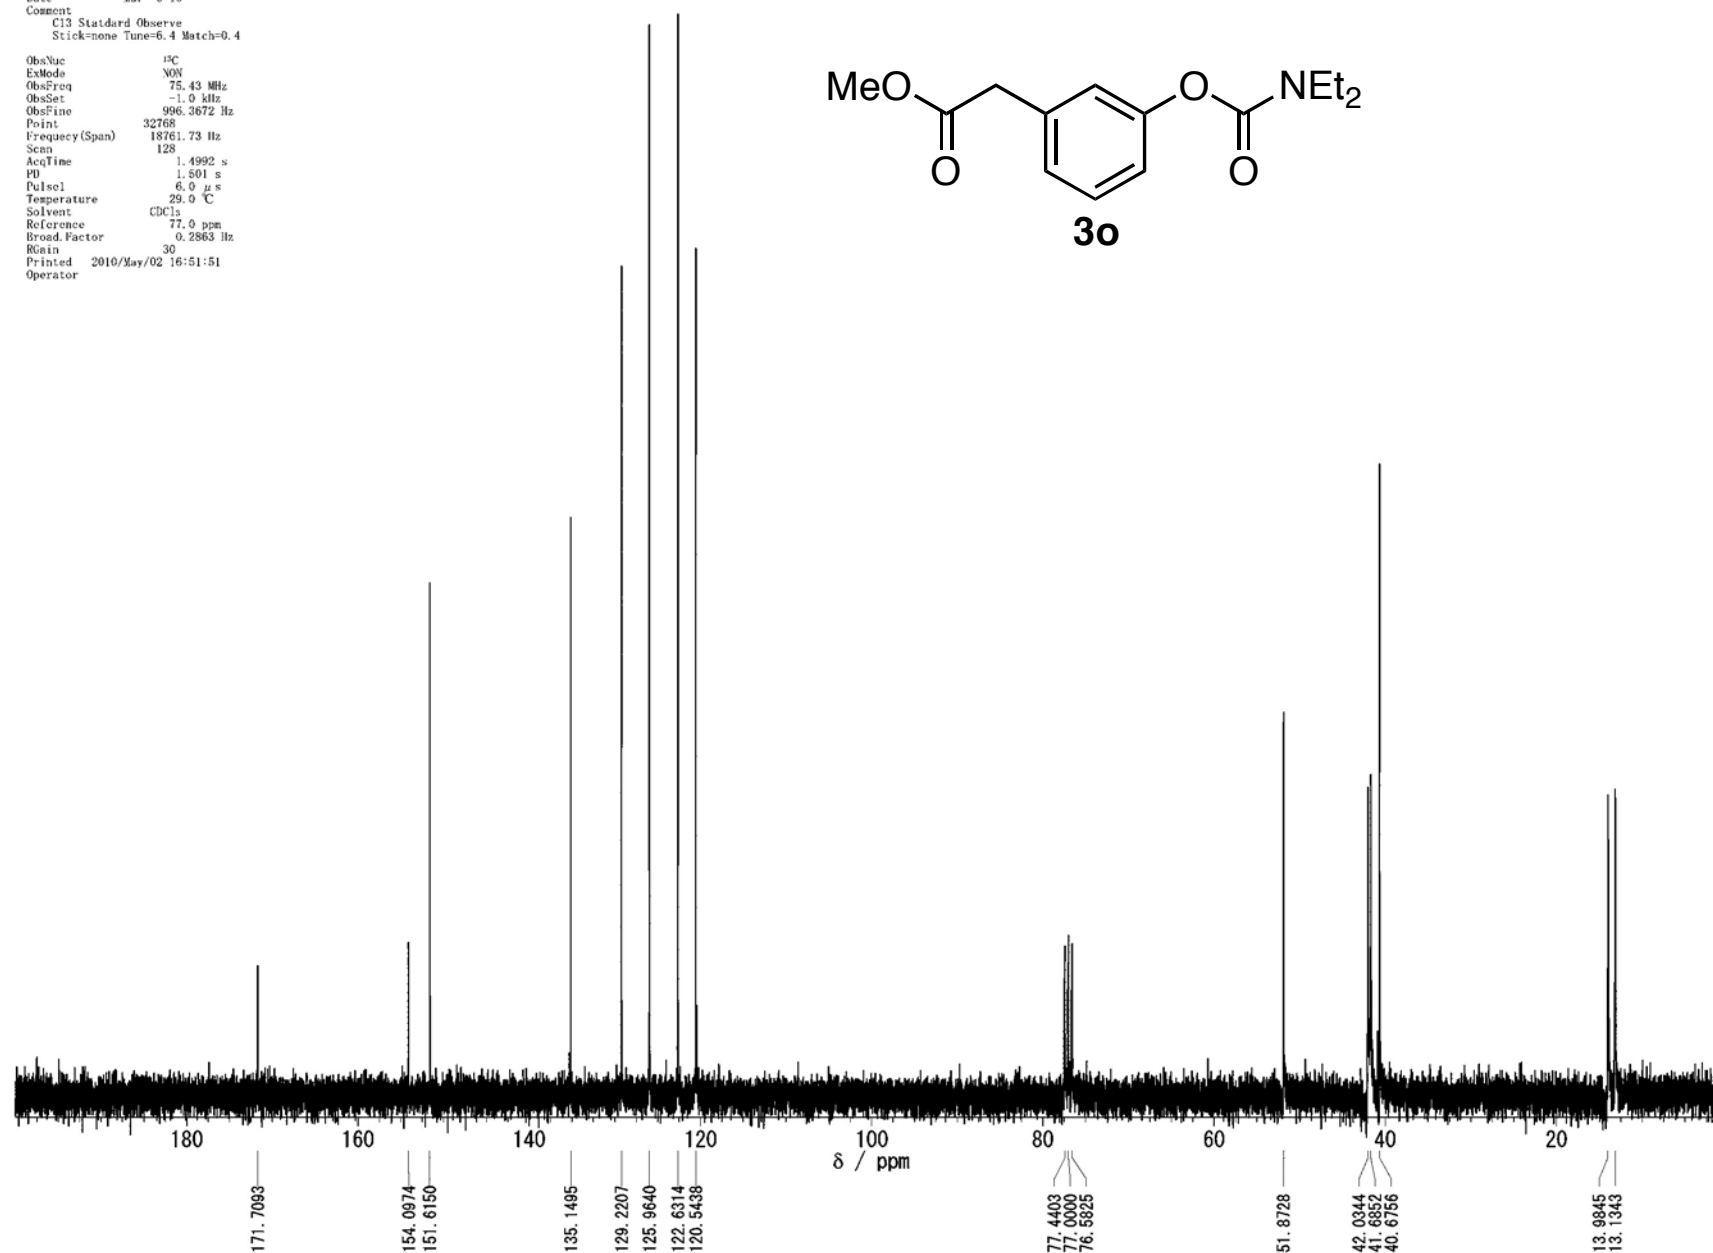

Original File:   
 Date Dec 10 09   
 Comment STANDARD IN OBSERVE   
 ObsNuc  $^1\text{H}$    
 ExMode NON   
 ObsFreq 299.96 MHz   
 ObsSet 1.0 kHz   
 ObsFine 995.0047 Hz   
 Point 16384   
 Frequency (Span) 4500.45 Hz   
 Scan 16   
 AcqTime 3.4983 s   
 PD 1.502 s   
 Pulse 6.0  $\mu\text{s}$    
 Temperature 29.0  $^{\circ}\text{C}$    
 Solvent  $\text{CDCl}_3$    
 Reference 0.0 ppm   
 Broad Factor 0.1373 Hz   
 RGain 24   
 Printed 2010/Jun/24 14:43:30   
 Operator

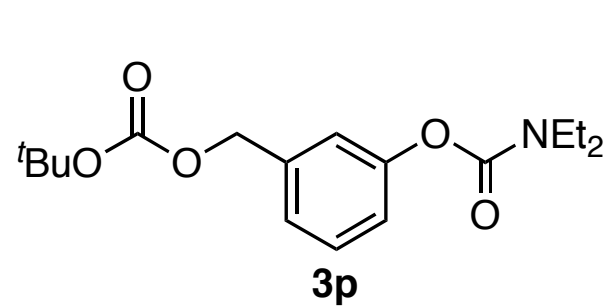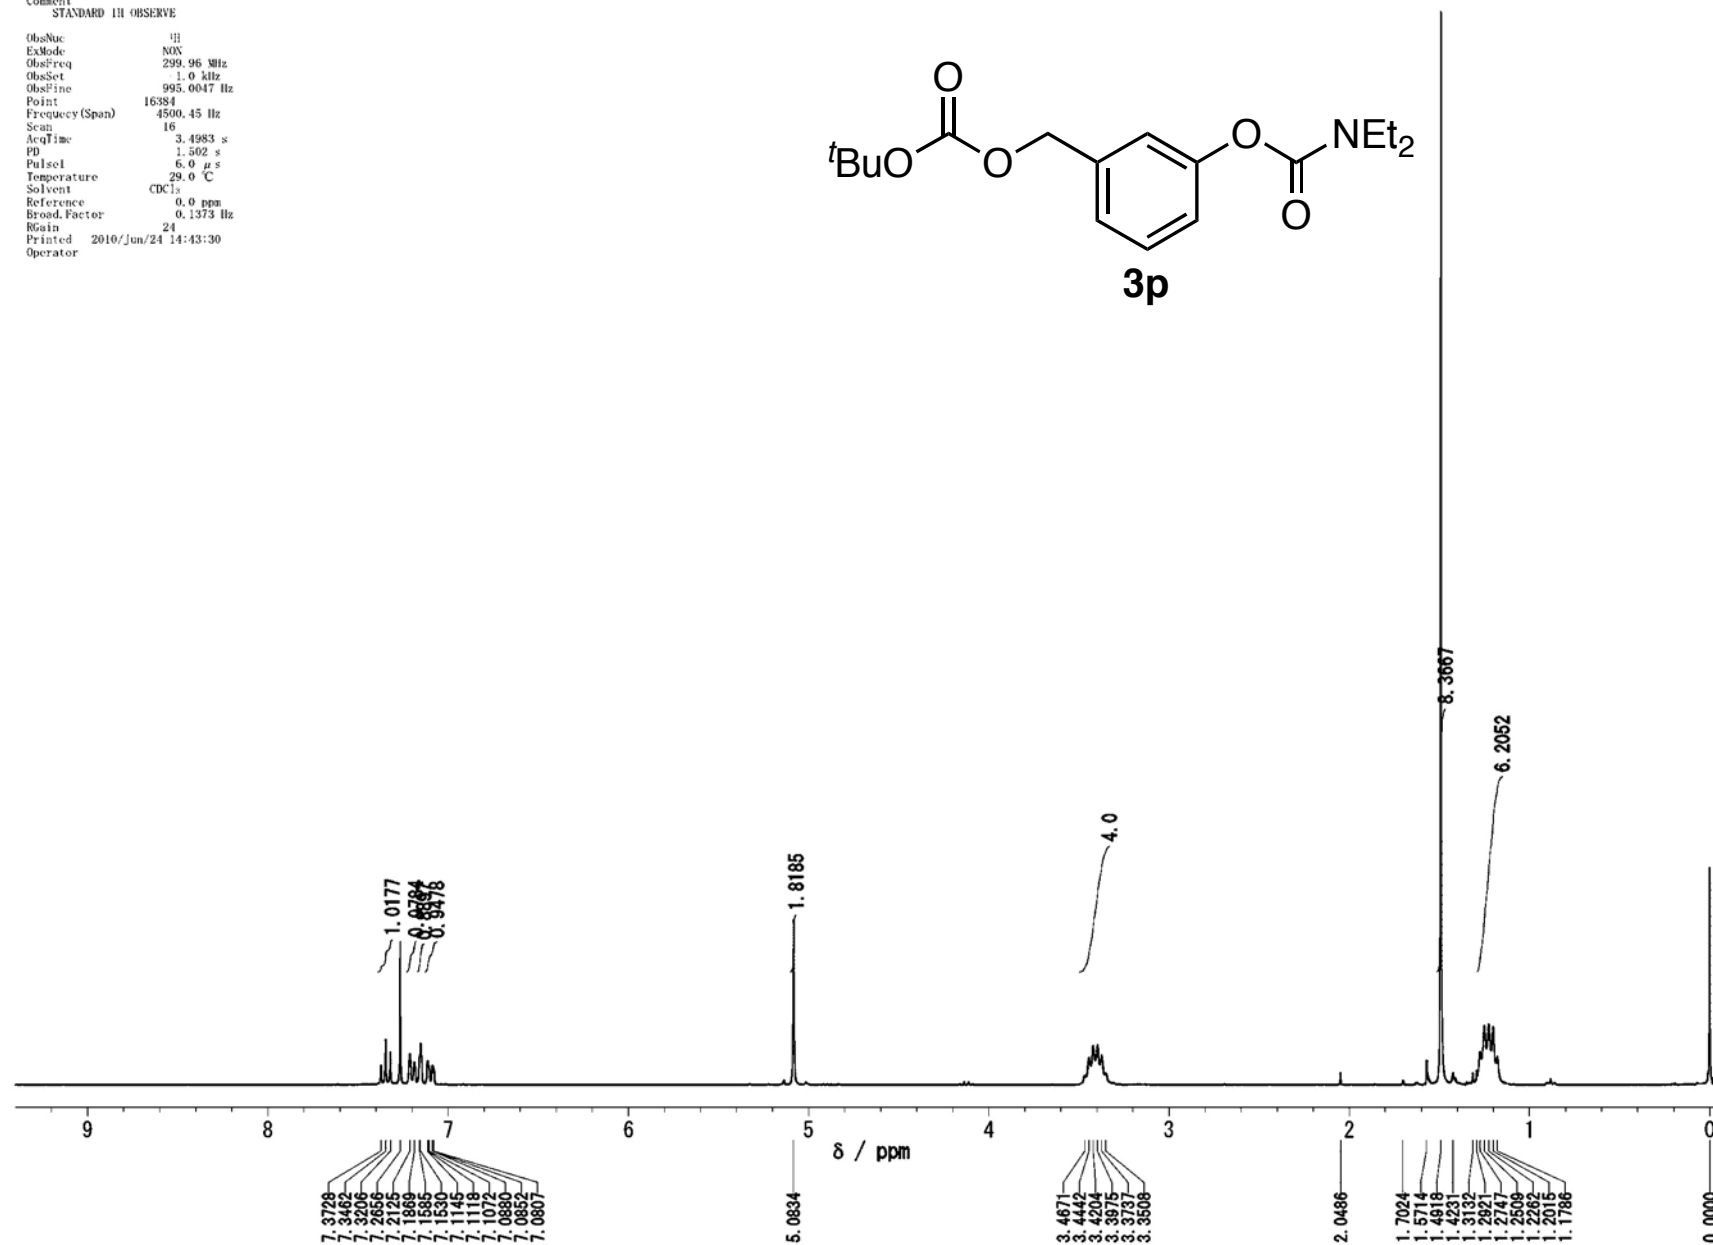

Original File:  
 Date Apr 30 10  
 Comment  
 C13 Standard Observe  
 Stick=none Tune=6.4 Match=0.4

ObsVac isC  
 ExMode NON  
 ObsFreq 75.43 MHz  
 ObsSet -1.0 kHz  
 ObsFine 996.3672 Hz  
 Point 32768  
 Frequency (Span) 18761.73 Hz  
 Scan 128  
 AcqTime 1.4992 s  
 PD 1.501 s  
 Pulse1 6.0  $\mu$ s  
 Temperature 29.0  $^{\circ}$ C  
 Solvent CDCl<sub>3</sub>  
 Reference 77.0 ppm  
 Broad Factor 0.2863 Hz  
 RGain 30  
 Printed 2010/May/02 16:54:54  
 Operator

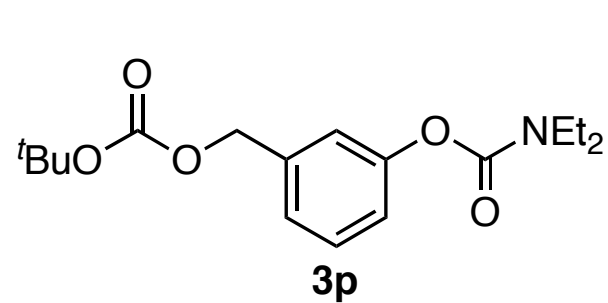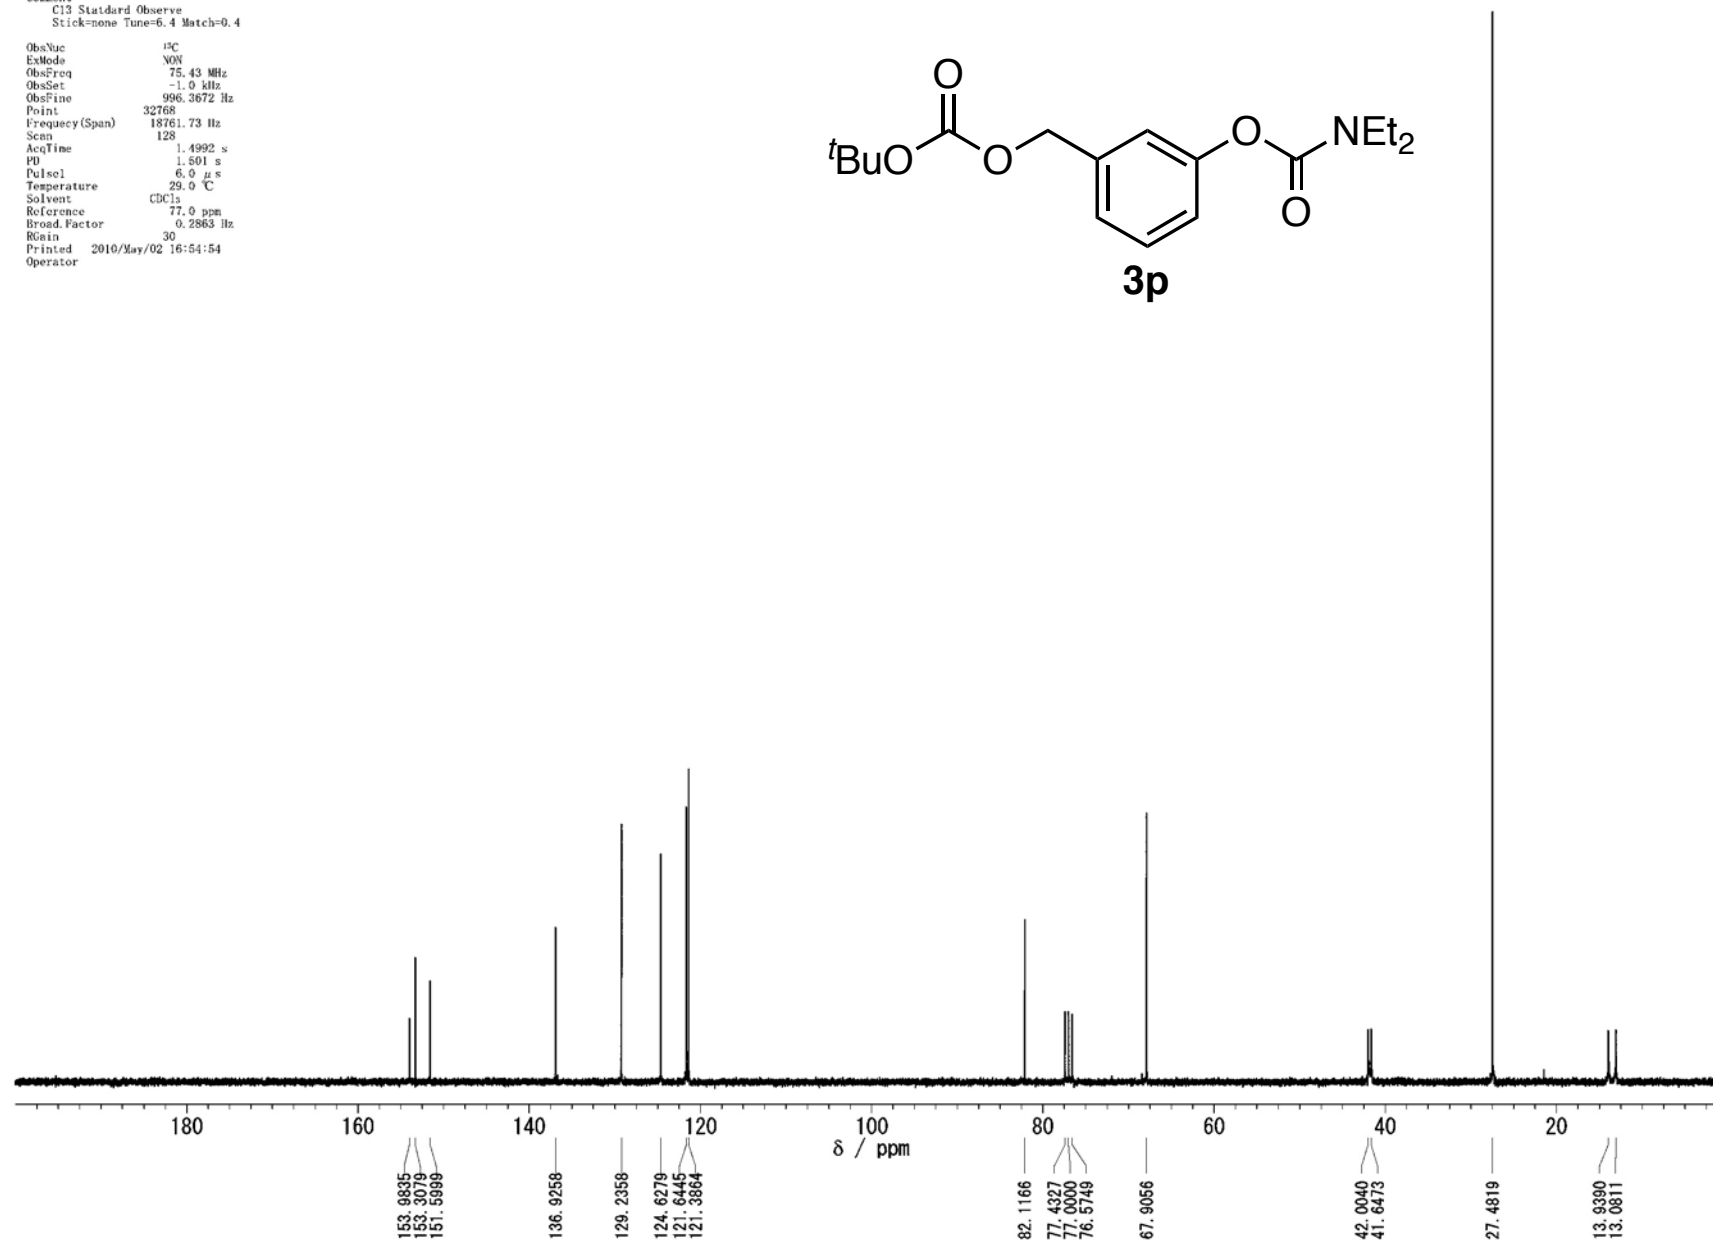

Original File:  
 Date Dec 14 09  
 Comment  
 STANDARD 1H OBSERVE

ObsNuc <sup>1</sup>H  
 ExMode NON  
 ObsFreq 299.96 MHz  
 ObsSet -1.0 kHz  
 ObsFine 995.0047 Hz  
 Point 16384  
 Frequency (Span) 4500.45 Hz  
 Scan 16  
 AcqTime 3.4983 s  
 PD 1.502 s  
 Pulse 6.0  $\mu$ s  
 Temperature 29.0  $^{\circ}$ C  
 Solvent CDCl<sub>3</sub>  
 Reference 0.0 ppm  
 Broad. Factor 0.1373 Hz  
 RGain 26  
 Printed 2010/May/02 16:58:27  
 Operator

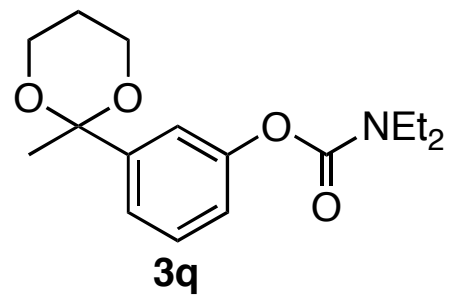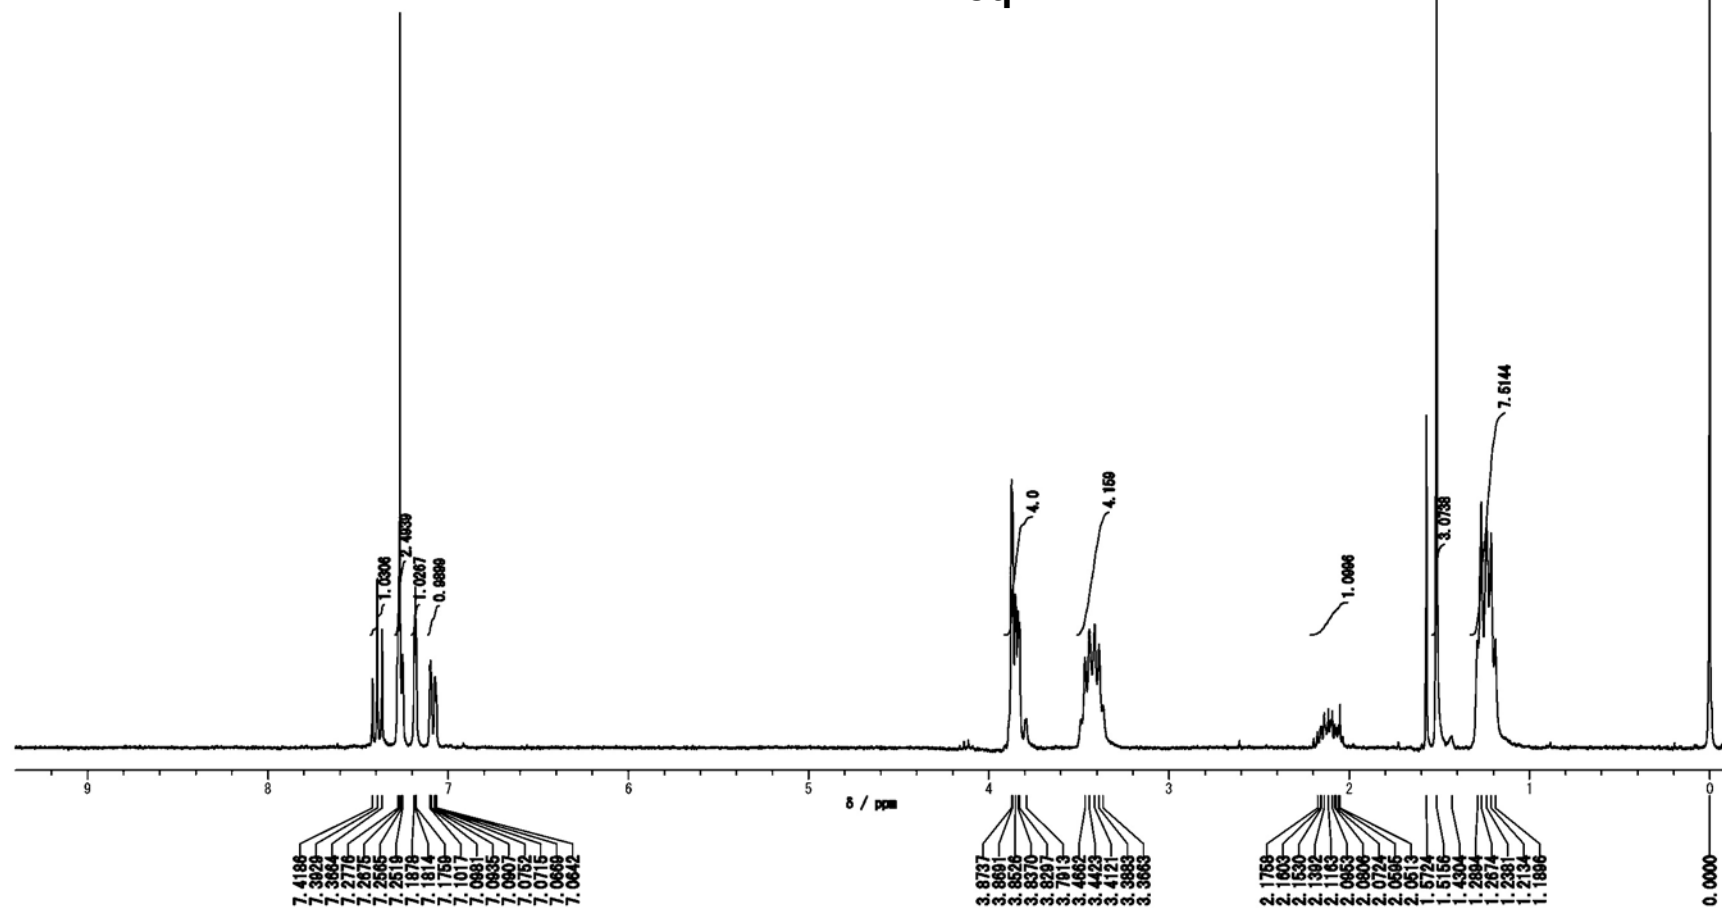



Original File:  
 Date Apr 30 10  
 Comment  
 C13 Standard Observe  
 Stick=none Tune=6.4 Match=0.4

ObsVac isC  
 ExMode NON  
 ObsFreq 75.43 MHz  
 ObsSet -1.0 kHz  
 ObsFine 996.3672 Hz  
 Point 32768  
 Frequency (Span) 18761.73 Hz  
 Scan 256  
 AcqTime 1.4992 s  
 PD 1.501 s  
 Pulse 6.0  $\mu$ s  
 Temperature 29.0  $^{\circ}$ C  
 Solvent CDCl<sub>3</sub>  
 Reference 77.0 ppm  
 Broad Factor 0.2863 Hz  
 RGain 30  
 Printed 2010/May/02 16:59:30  
 Operator

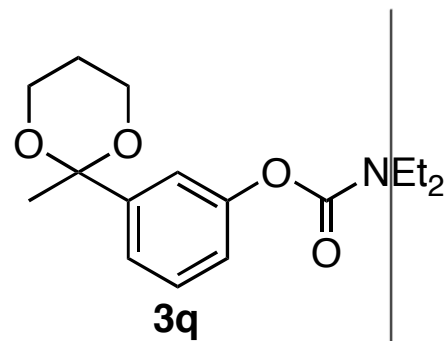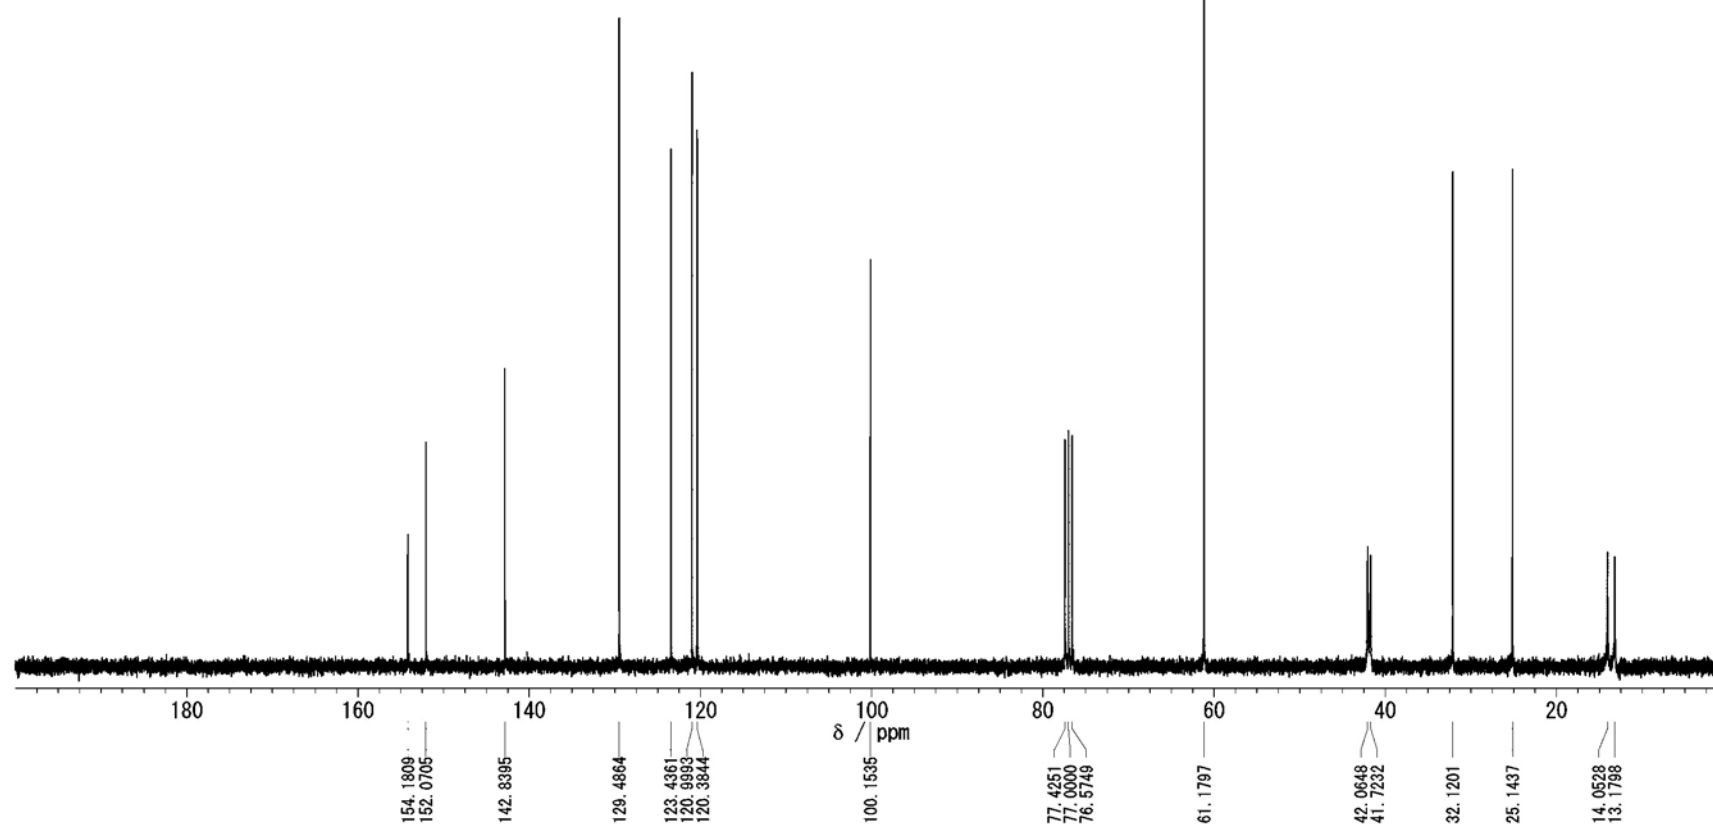

Original File:   
 Date Sep 9 09   
 Comment   
 STANDARD 1H OBSERVE   
 ObsNuc <sup>1</sup>H   
 ExMode NON   
 ObsFreq 299.96 MHz   
 ObsSet -1.0 kHz   
 ObsFine 995.0047 Hz   
 Point 16384   
 Frequency (Span) 4500.45 Hz   
 Scan 16   
 AcqTime 3.4983 s   
 PD 1.502 s   
 Pulse 6.0  $\mu$ s   
 Temperature 29.0  $^{\circ}$ C   
 Solvent CDCl<sub>3</sub>   
 Reference 0.0 ppm   
 Broad Factor 0.1373 Hz   
 RGain 24   
 Printed 2010/May/02 17:02:15   
 Operator

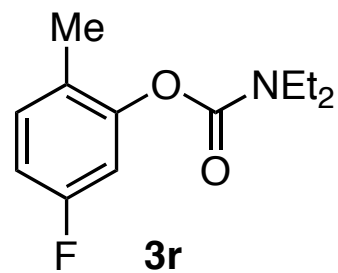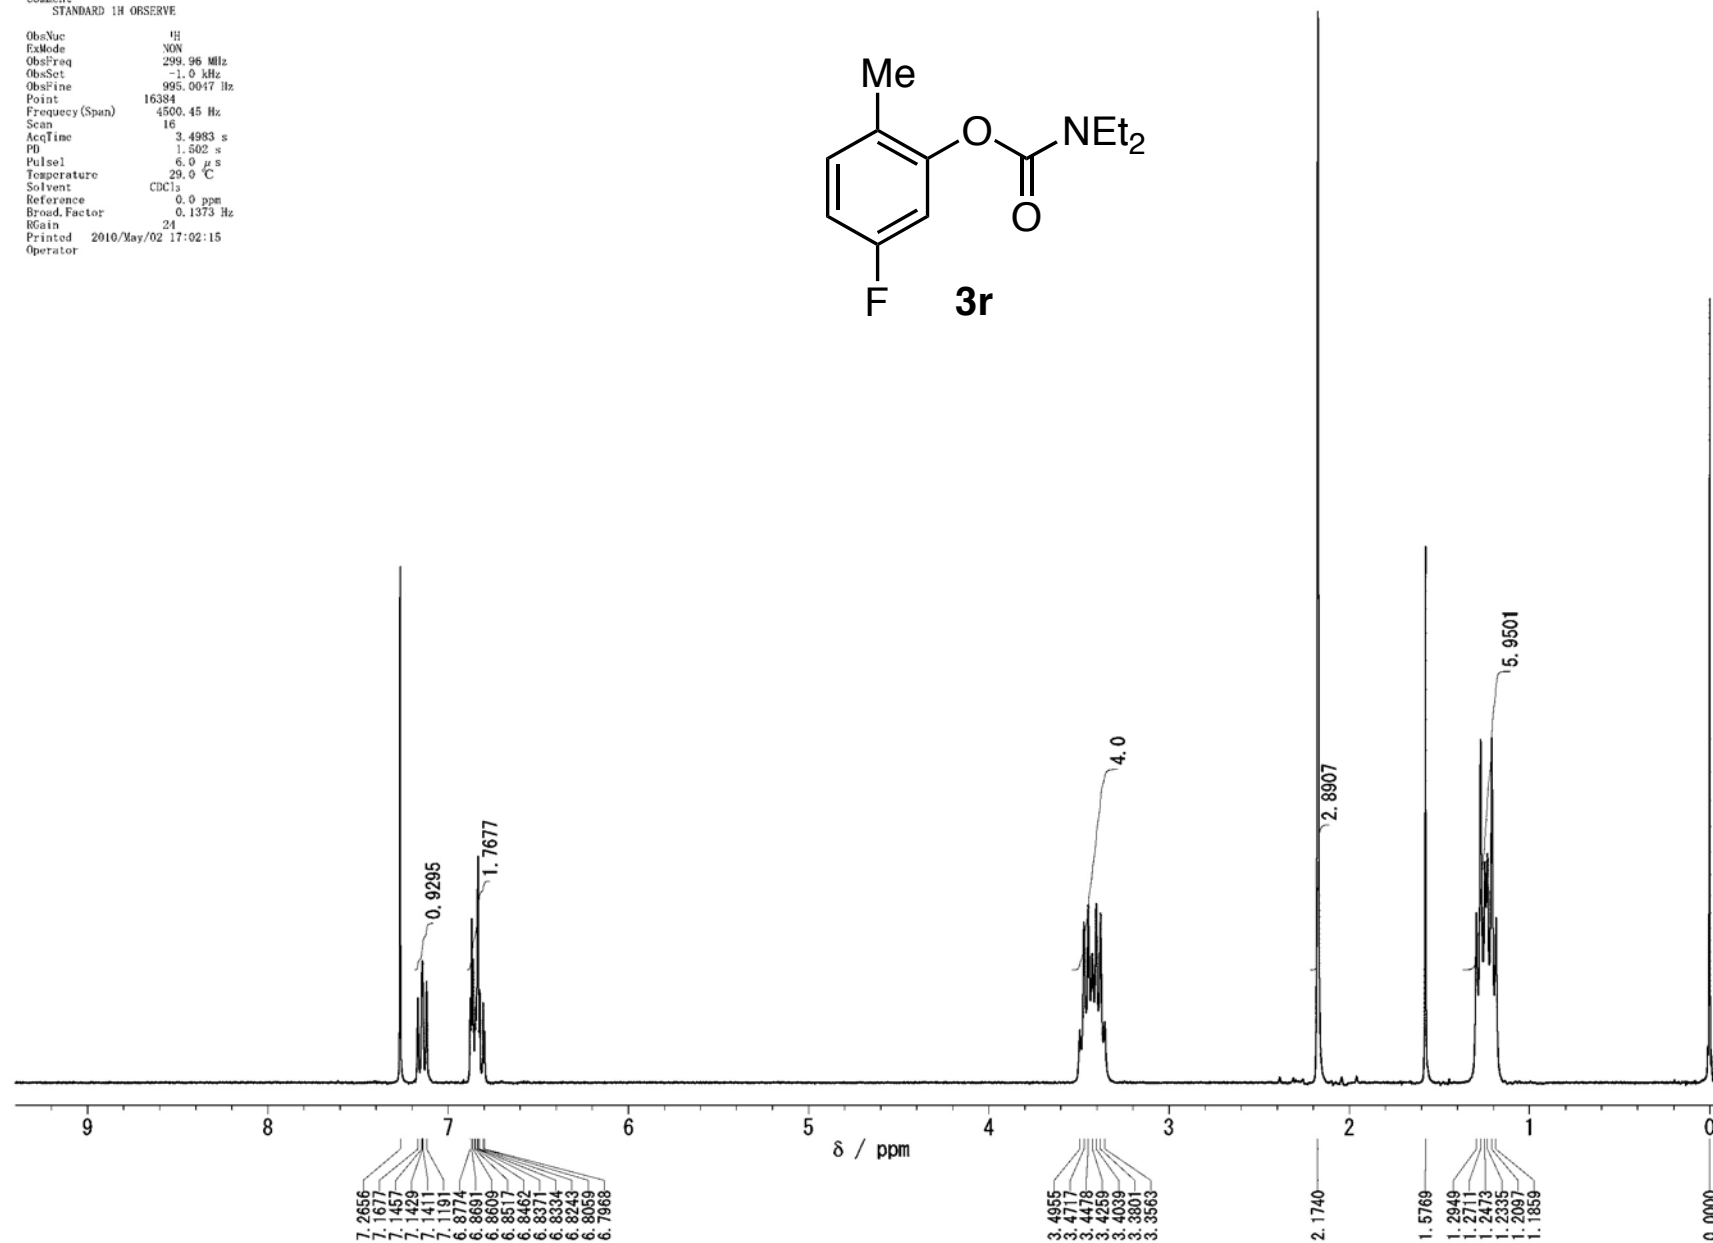

Original File:  
 Date Apr 30 10  
 Comment  
 C13 Standard Observe  
 Stick=none Tune=6.4 Match=0.4

ObsVac isC  
 ExMode NON  
 ObsFreq 75.43 MHz  
 ObsSet -1.0 kHz  
 ObsFine 996.3672 Hz  
 Point 32768  
 Frequency (Span) 18761.73 Hz  
 Scan 1024  
 AcqTime 1.4992 s  
 PD 1.501 s  
 Pulse1 6.0  $\mu$ s  
 Temperature 29.0  $^{\circ}$ C  
 Solvent CDCl<sub>3</sub>  
 Reference 77.0 ppm  
 Broad.Factor 0.2863 Hz  
 RGain 30  
 Printed 2010/May/02 17:03:18  
 Operator

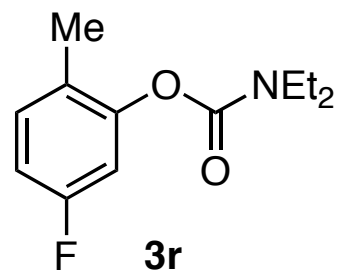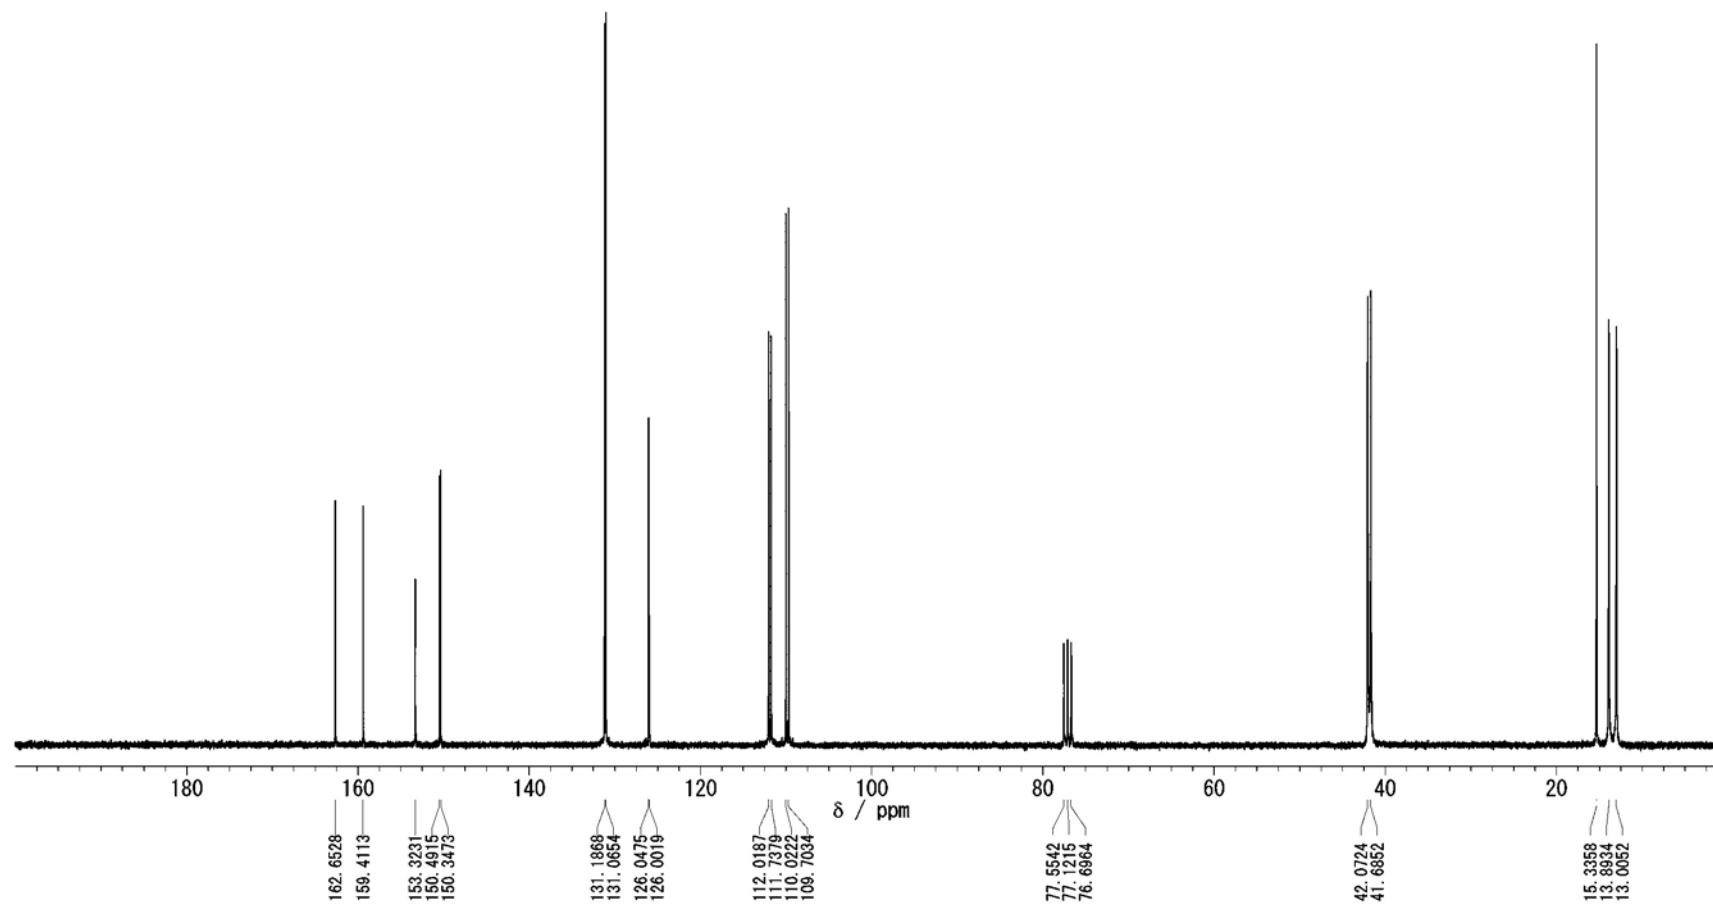

Original File:  
 Date May 29 09  
 Comment  
 STANDARD 1H OBSERVE

ObsVuc <sup>1</sup>H  
 ExMode NON  
 ObsFreq 299.96 MHz  
 ObsSet -1.0 kHz  
 ObsFine 995.0047 Hz  
 Point 16384  
 Frequency (Span) 4500.45 Hz  
 Scan 16  
 AcqTime 3.4983 s  
 PD 1.502 s  
 Pulse 6.0  $\mu$ s  
 Temperature 29.0  $^{\circ}$ C  
 Solvent CDCl<sub>3</sub>  
 Reference 0.0 ppm  
 Broad Factor 0.1373 Hz  
 RGain 20  
 Printed 2010/May/02 17:05:34  
 Operator

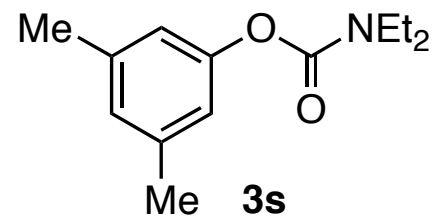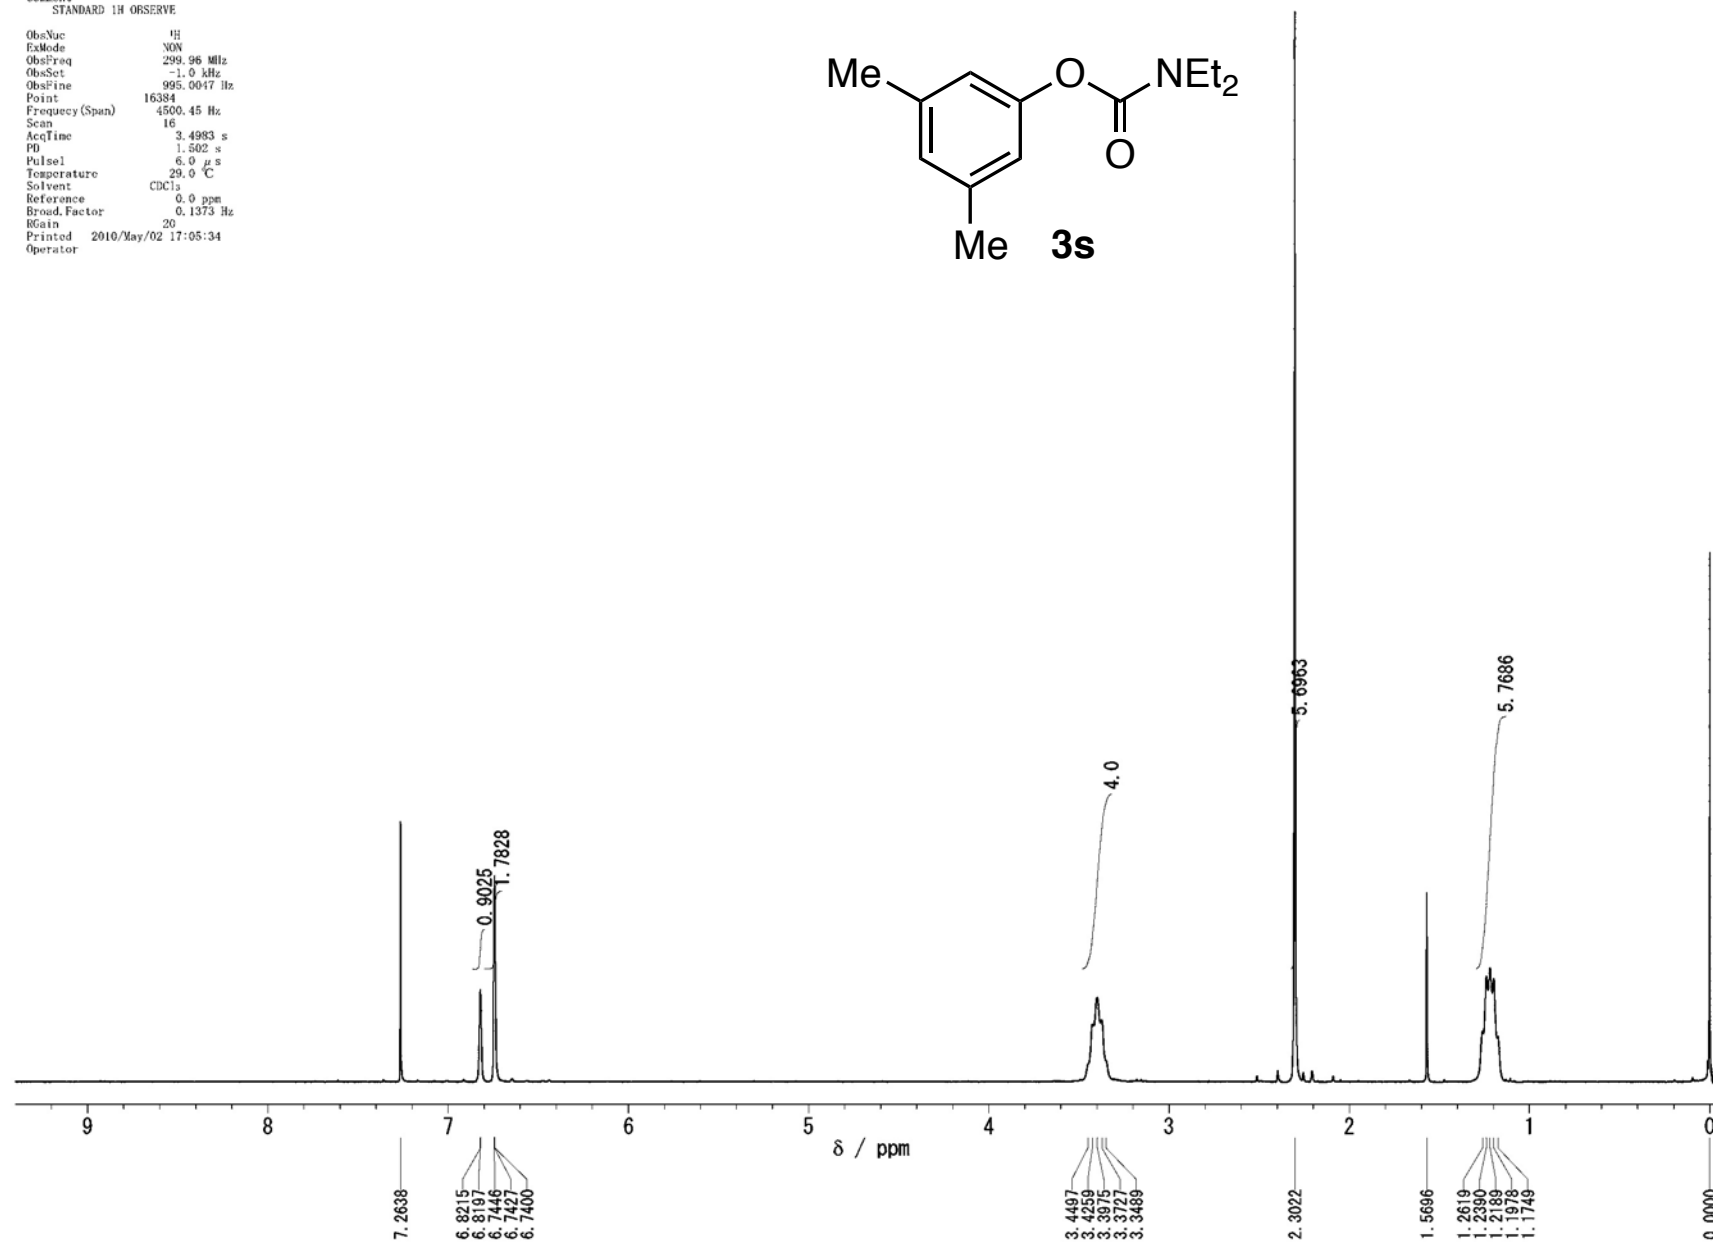

Original File:  
 Date Apr 30 10  
 Comment  
 C13 Standard Observe  
 Stick=none Tune=6.4 Match=0.4

ObsVac isC  
 ExMode NON  
 ObsFreq 75.43 MHz  
 ObsSet -1.0 kHz  
 ObsFine 996.3672 Hz  
 Point 32768  
 Frequency (Span) 18761.73 Hz  
 Scan 128  
 AcqTime 1.4992 s  
 PD 1.501 s  
 Pulse1 6.0  $\mu$ s  
 Temperature 29.0  $^{\circ}$ C  
 Solvent CDCl<sub>3</sub>  
 Reference 77.0 ppm  
 Broad Factor 0.2863 Hz  
 RGain 30  
 Printed 2010/May/02 17:06:52  
 Operator

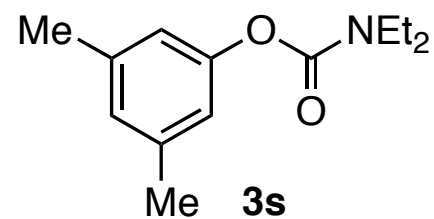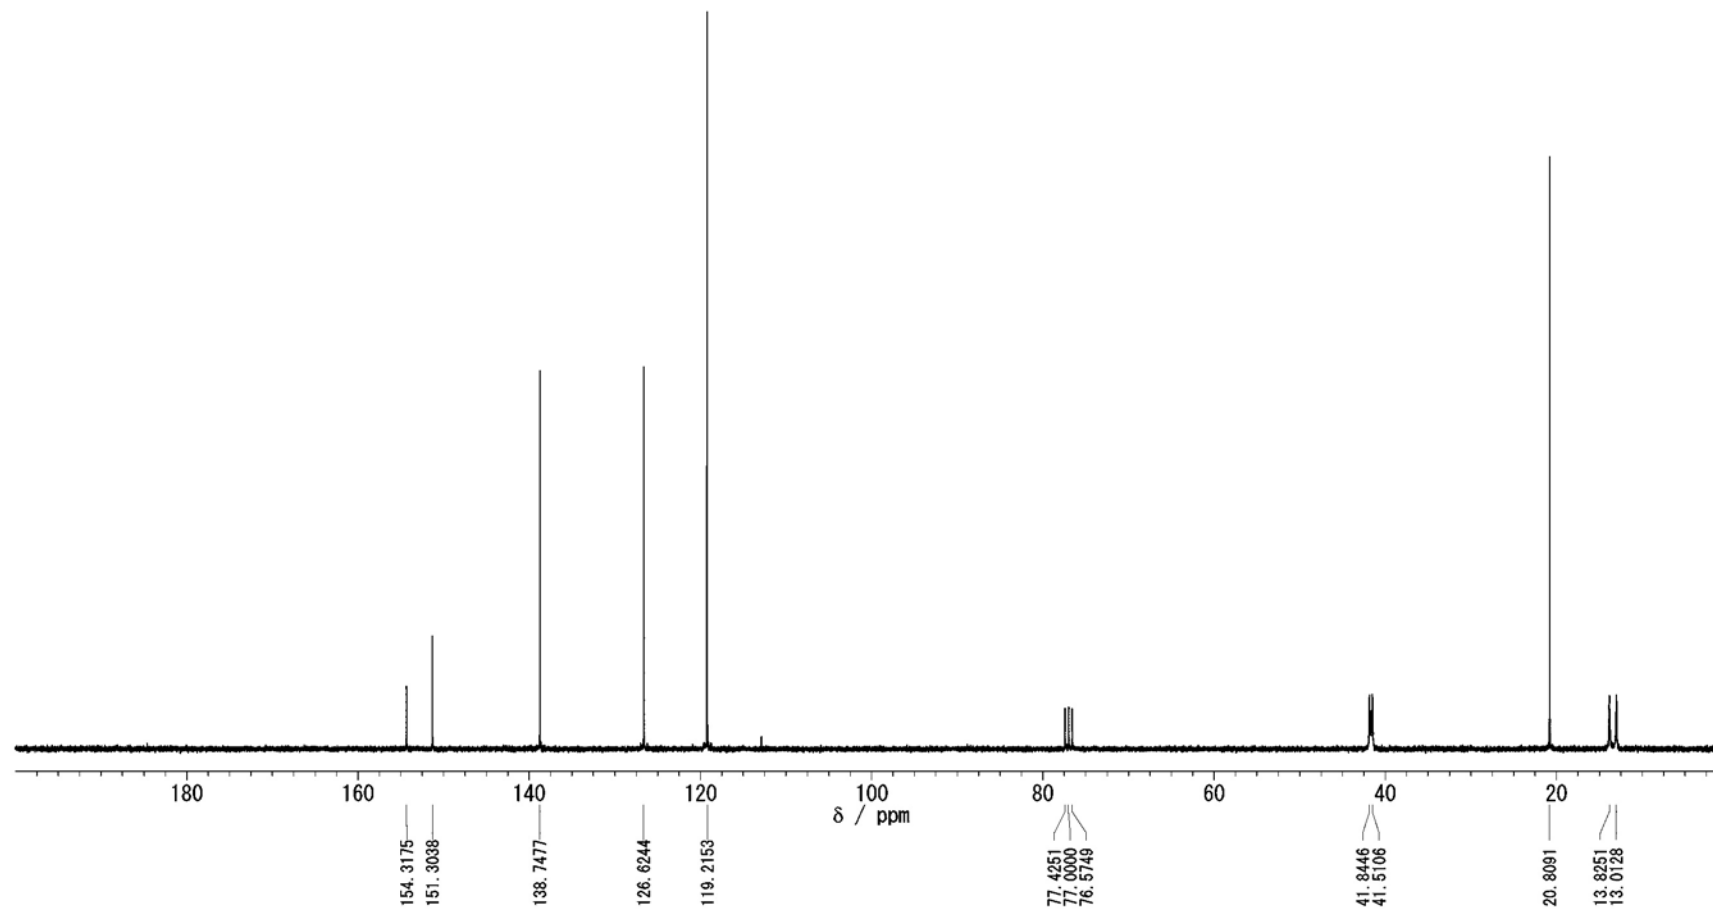

Original File:  
 Date Jan 14 10  
 Comment  
 STANDARD IN OBSERVE

ObsNuc <sup>1</sup>H  
 ExMode NON  
 ObsFreq 299.96 MHz  
 ObsSet 1.0 kHz  
 ObsFine 995.0047 Hz  
 Point 16384  
 Frequency (Span) 4500.45 Hz  
 Scan 16  
 AcqTime 3.4983 s  
 PD 1.502 s  
 Pulse 6.0  $\mu$ s  
 Temperature 29.0  $^{\circ}$ C  
 Solvent CDCl<sub>3</sub>  
 Reference 0.0 ppm  
 Broad Factor 0.1373 Hz  
 RGain 30  
 Printed 2010/May/17 14:30:39  
 Operator

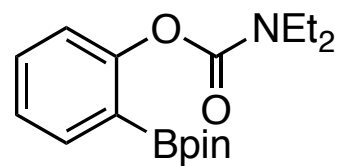

4aa

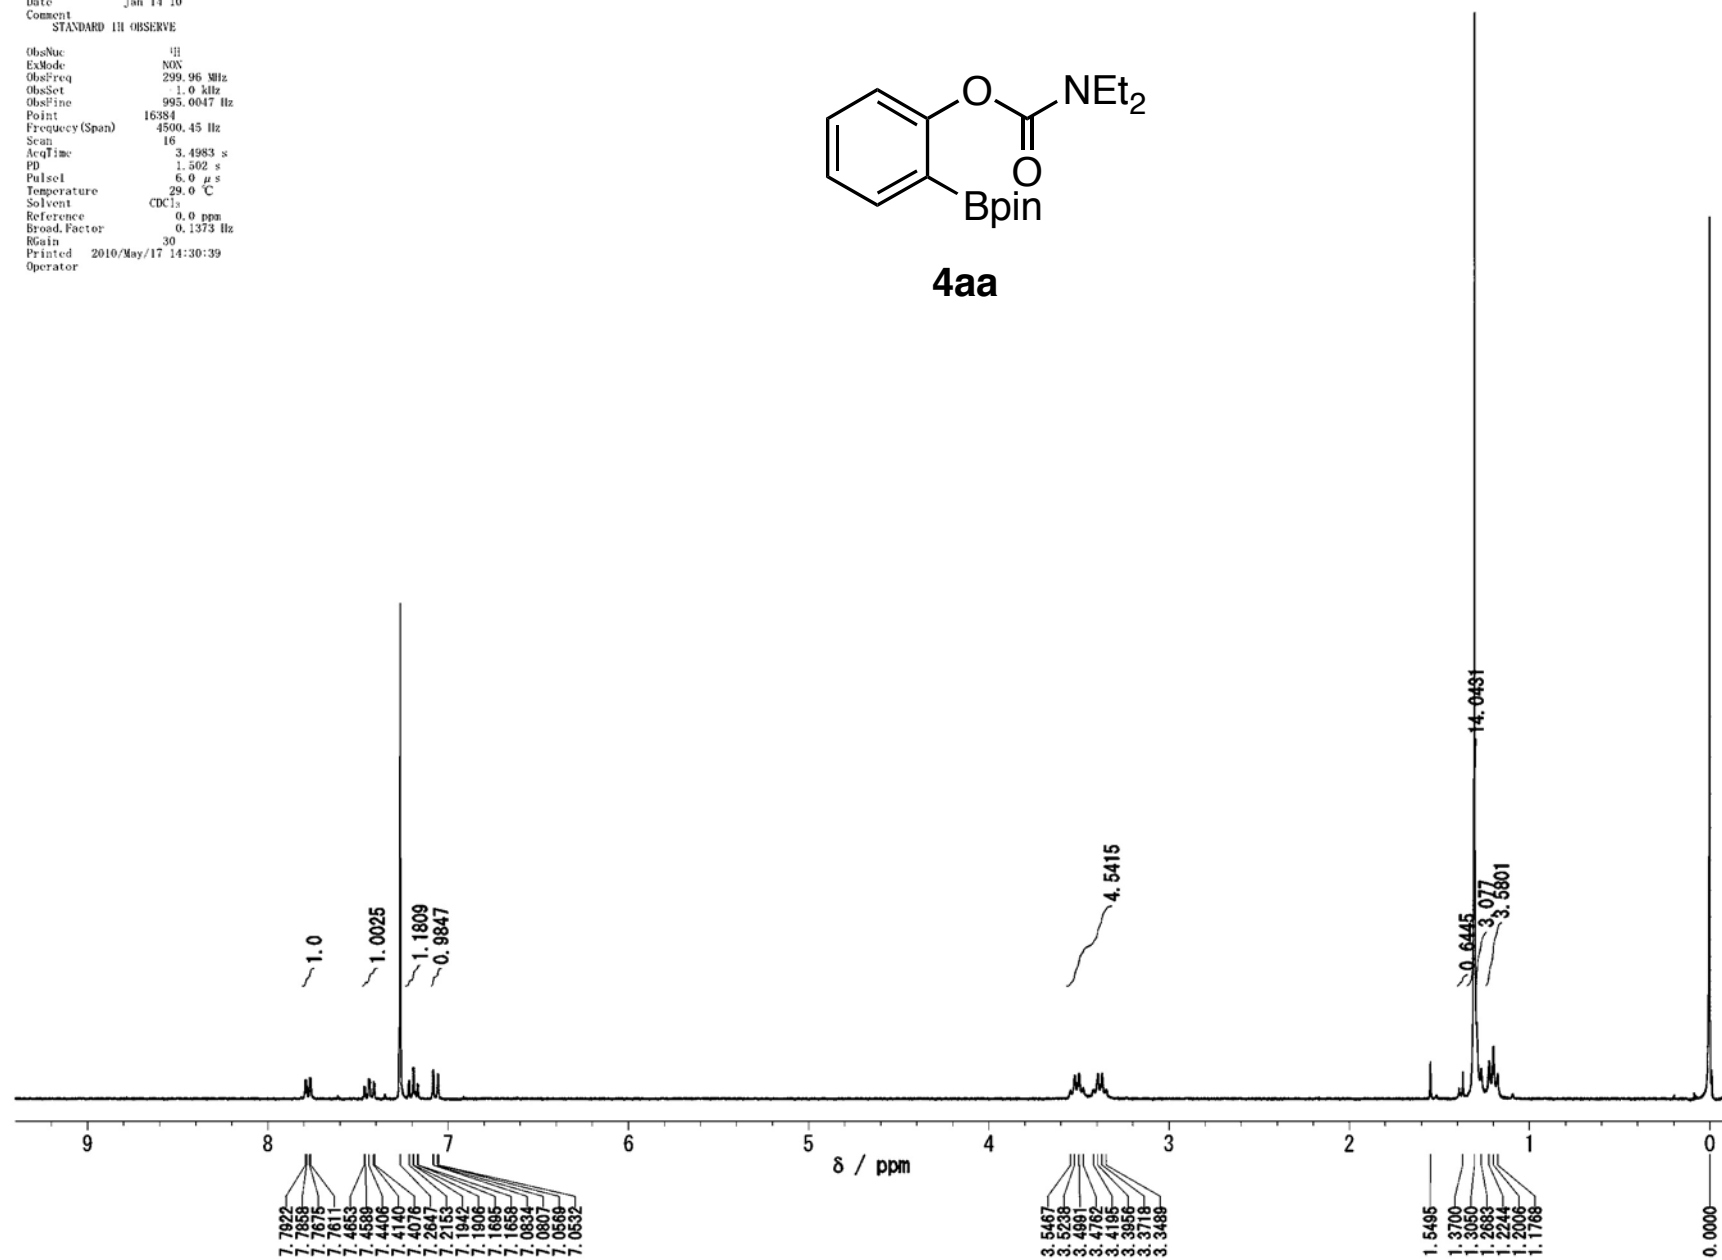

Date May 17 10  
 Comment C13 Standard Observe  
 Stick:none Tune=6.4 Match=0.1  
 ObsNuc <sup>13</sup>C  
 ExMode NOX  
 ObsFreq 75.43 MHz  
 ObsSet -1.0 kHz  
 ObsFine 996.3672 Hz  
 Point 32768  
 Frequency (Span) 18761.73 Hz  
 Scan 128  
 AcqTime 1.4992 s  
 PD 1.501 s  
 Pulse 6.0 μs  
 Temperature 29.0 °C  
 Solvent CDCl<sub>3</sub>  
 Reference 77.0 ppm  
 Broad. Factor 0.25 Hz  
 RGain 30  
 Printed 2010/May/17 14:43:13  
 Operator

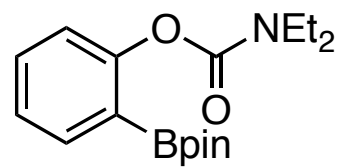

4aa

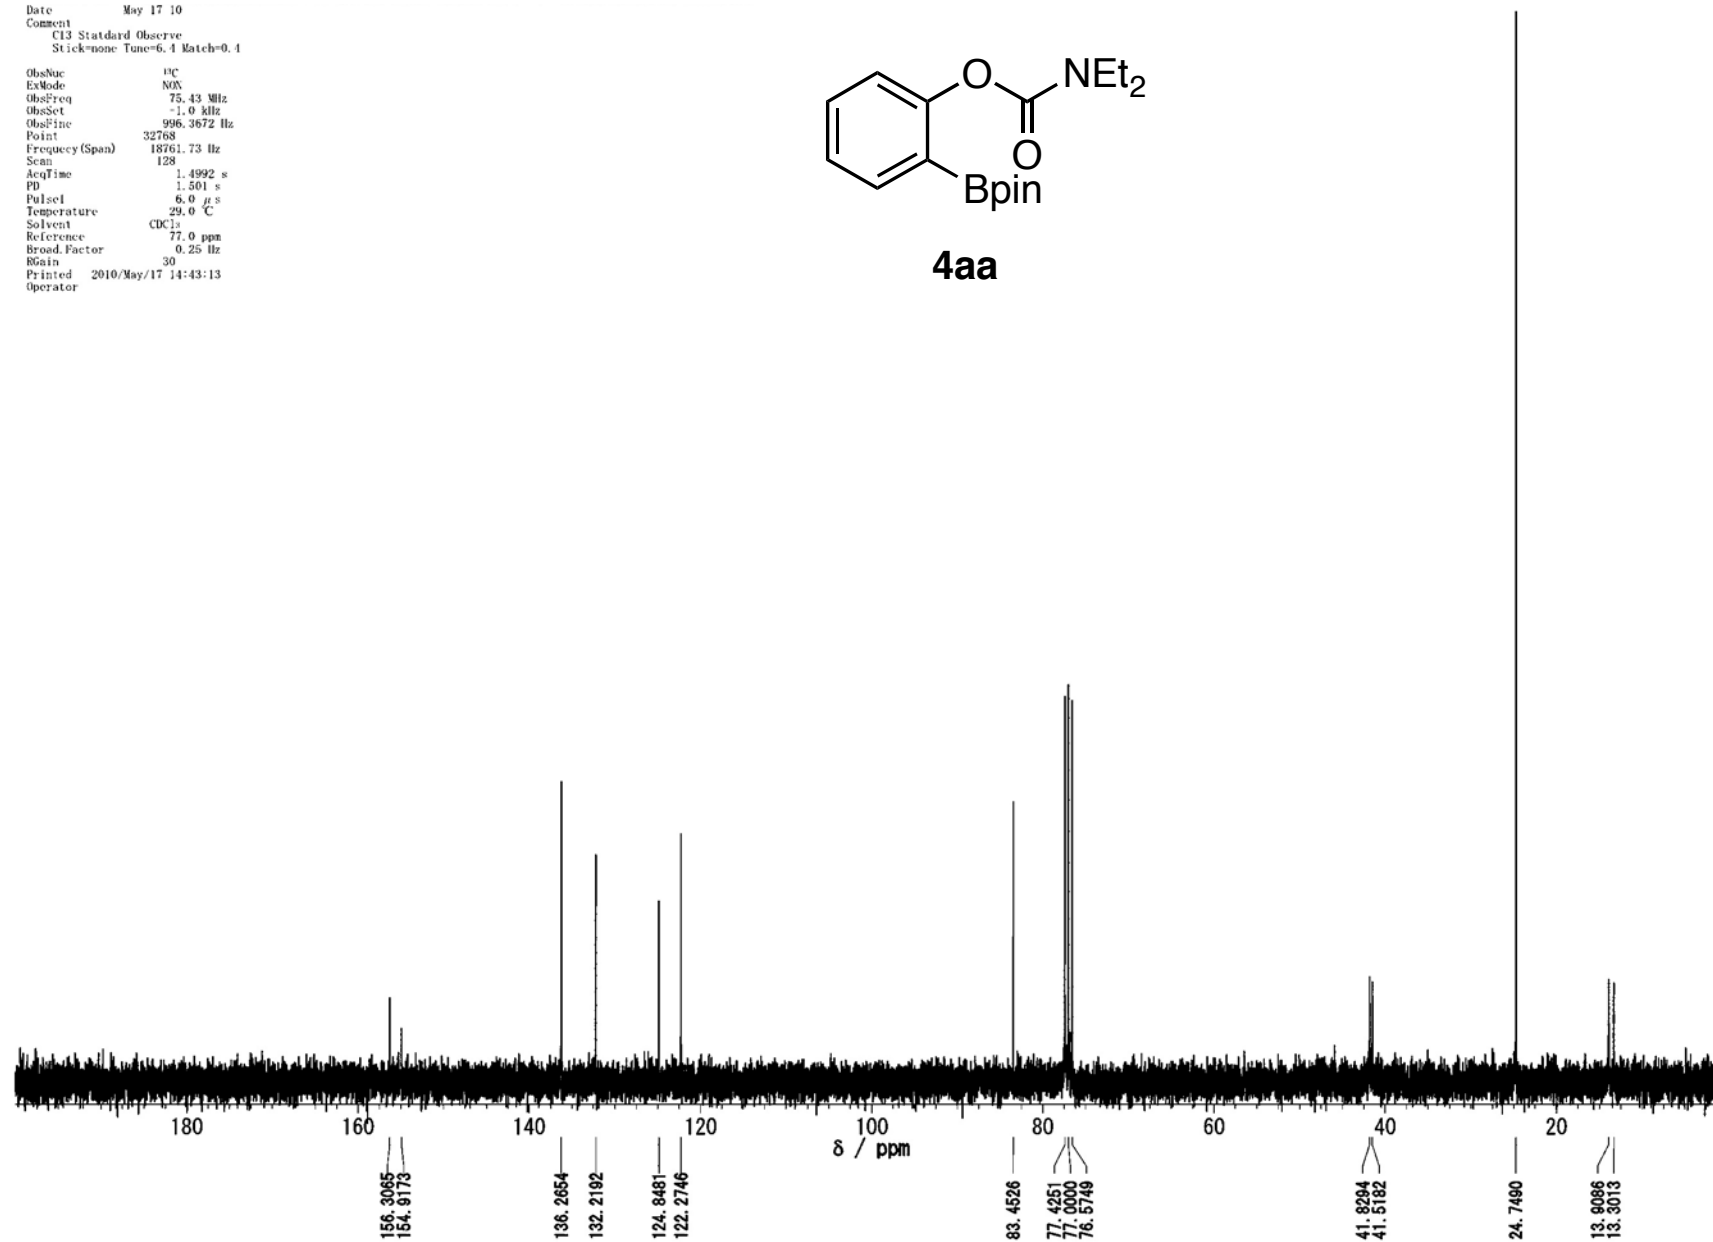

Original File:  
 Date Apr 20 10  
 Comment  
 STANDARD IN OBSERVE

ObsNuc <sup>1</sup>H  
 ExMode NON  
 ObsFreq 299.96 MHz  
 ObsSet 1.0 kHz  
 ObsFine 995.0047 Hz  
 Point 16384  
 Frequency (Span) 4500.45 Hz  
 Scan 16  
 AcqTime 3.4983 s  
 PD 1.502 s  
 Pulse 6.0  $\mu$ s  
 Temperature 29.0  $^{\circ}$ C  
 Solvent CDCl<sub>3</sub>  
 Reference 0.0 ppm  
 Broad Factor 0.1573 Hz  
 RGain 30  
 Printed 2010/Jun/24 14:46:25  
 Operator

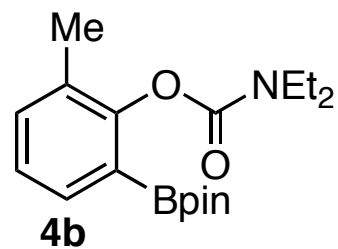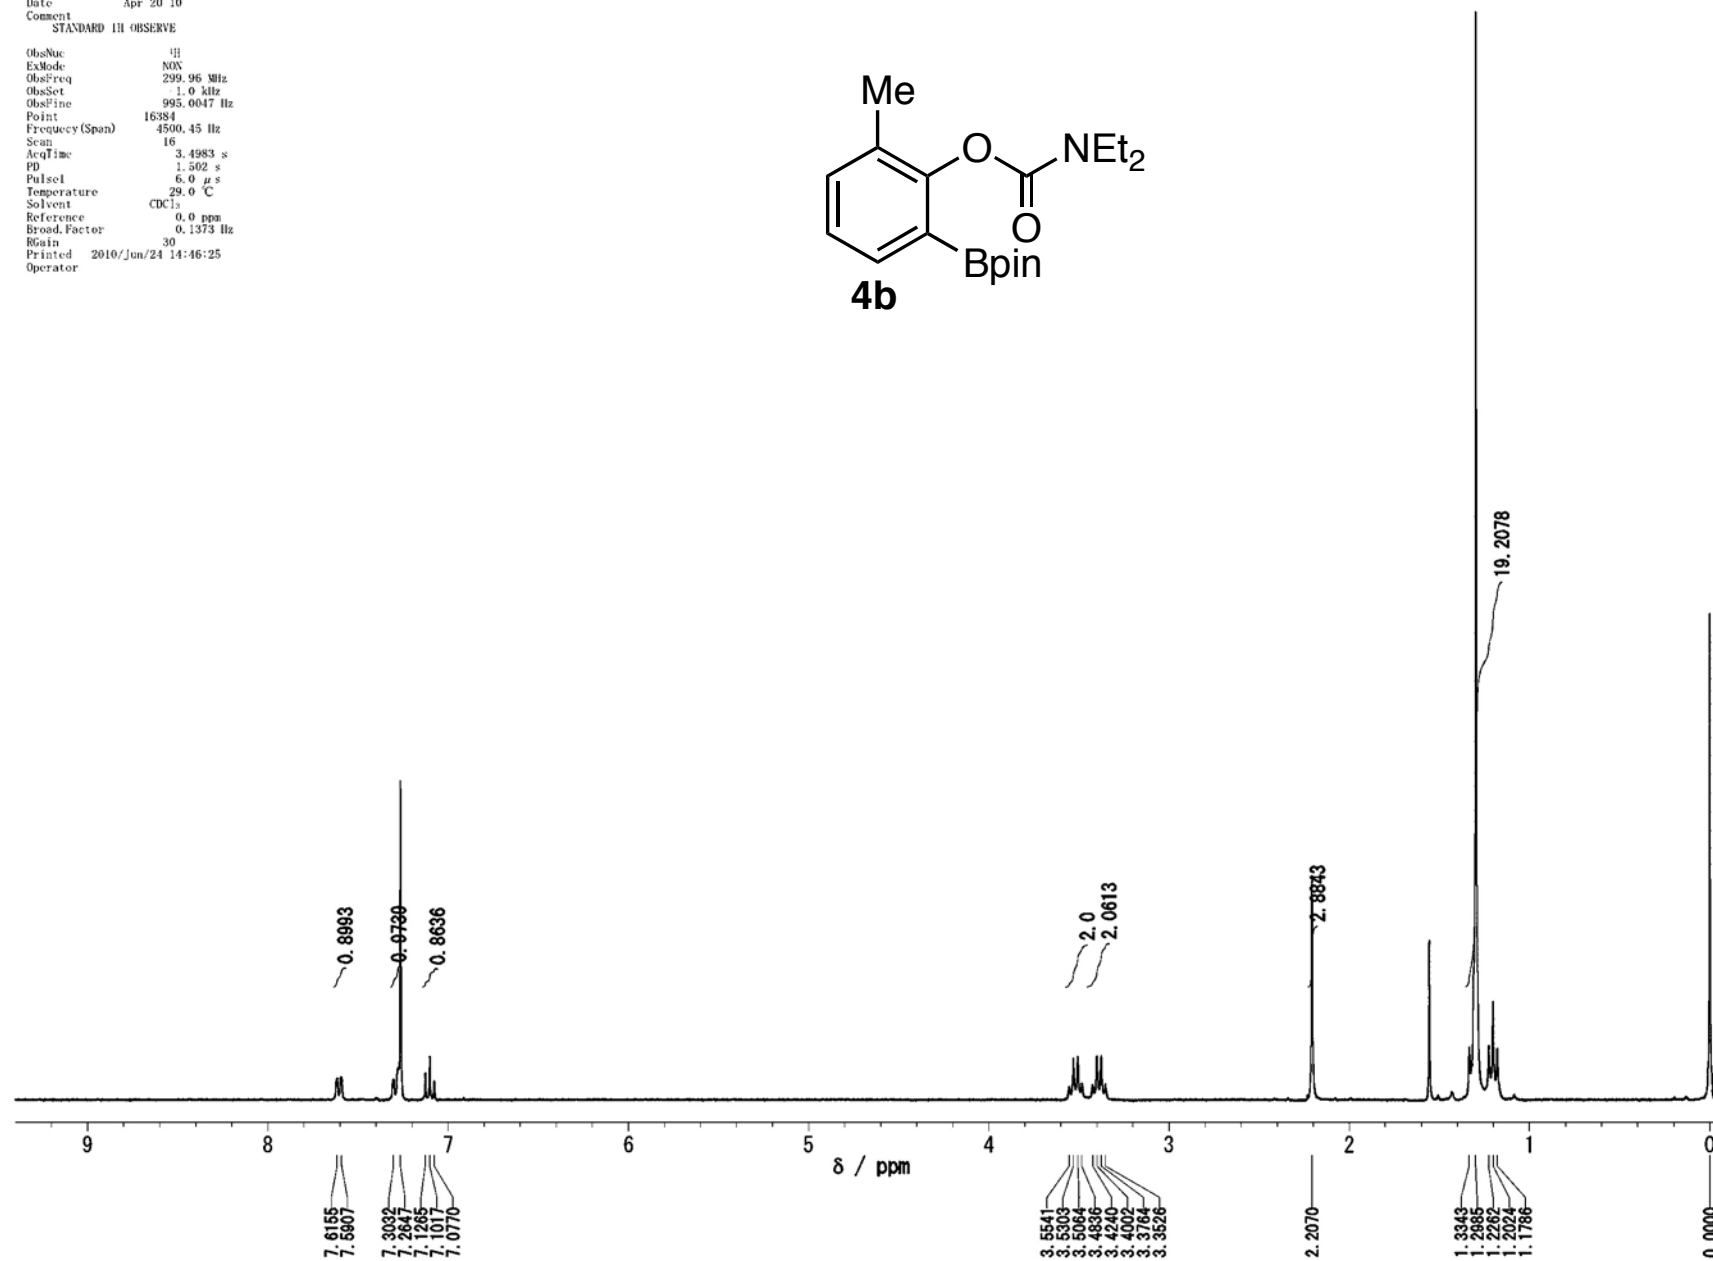



Original File:  
 Date Apr 27 10  
 Comment  
 C13 Standard Observe  
 Stick=none Tune=6.4 Match=0.4  
 ObsNuc <sup>13</sup>C  
 ExMode NON  
 ObsFreq 75.43 MHz  
 ObsSet 1.0 kHz  
 ObsFine 996.3672 Hz  
 Point 32768  
 Frequency (Span) 18761.73 Hz  
 Scan 64  
 AcqTime 1.4992 s  
 PD 1.501 s  
 Pulse 6.0  $\mu$ s  
 Temperature 29.0  $^{\circ}$ C  
 Solvent CDCl<sub>3</sub>  
 Reference 77.0 ppm  
 Broad Factor 0.2863 Hz  
 RGain 30  
 Printed 2010/May/02 13:09:00  
 Operator

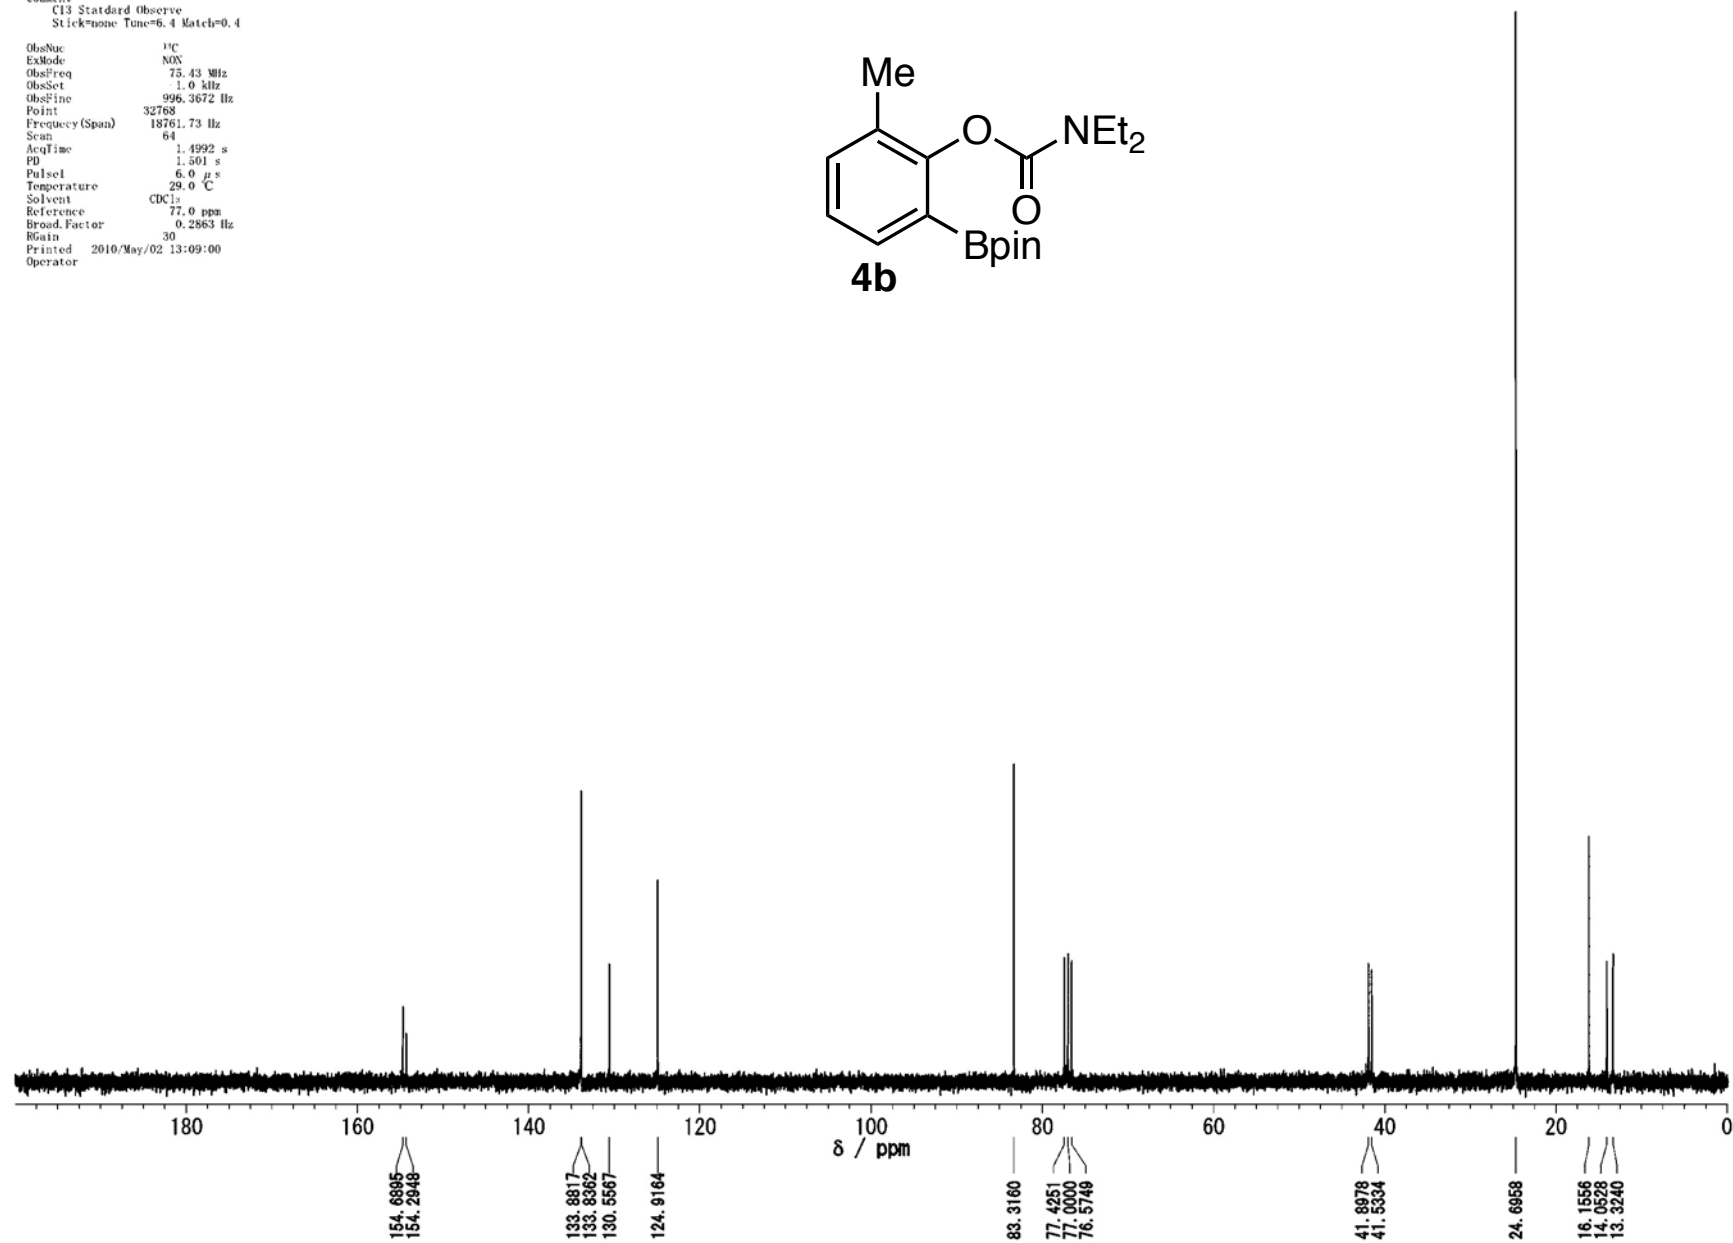

Original File:   
 Date Dec 7 09   
 Comment   
 STANDARD IN OBSERVE   
 ObsNuc <sup>1</sup>H   
 ExMode NON   
 ObsFreq 299.96 MHz   
 ObsSet 1.0 kHz   
 ObsFine 995.0047 Hz   
 Point 16384   
 Frequency (Span) 4500.45 Hz   
 Scan 16   
 AcqTime 3.4983 s   
 PD 1.502 s   
 Pulsel 6.0  $\mu$ s   
 Temperature 29.0  $^{\circ}$ C   
 Solvent CDCl<sub>3</sub>   
 Reference 0.0 ppm   
 Broad Factor 0.1373 Hz   
 RGain 24   
 Printed 2010/Jun/24 14:48:11   
 Operator

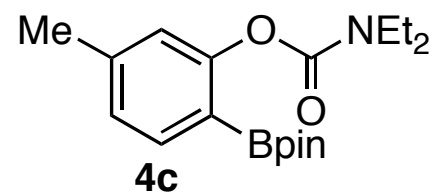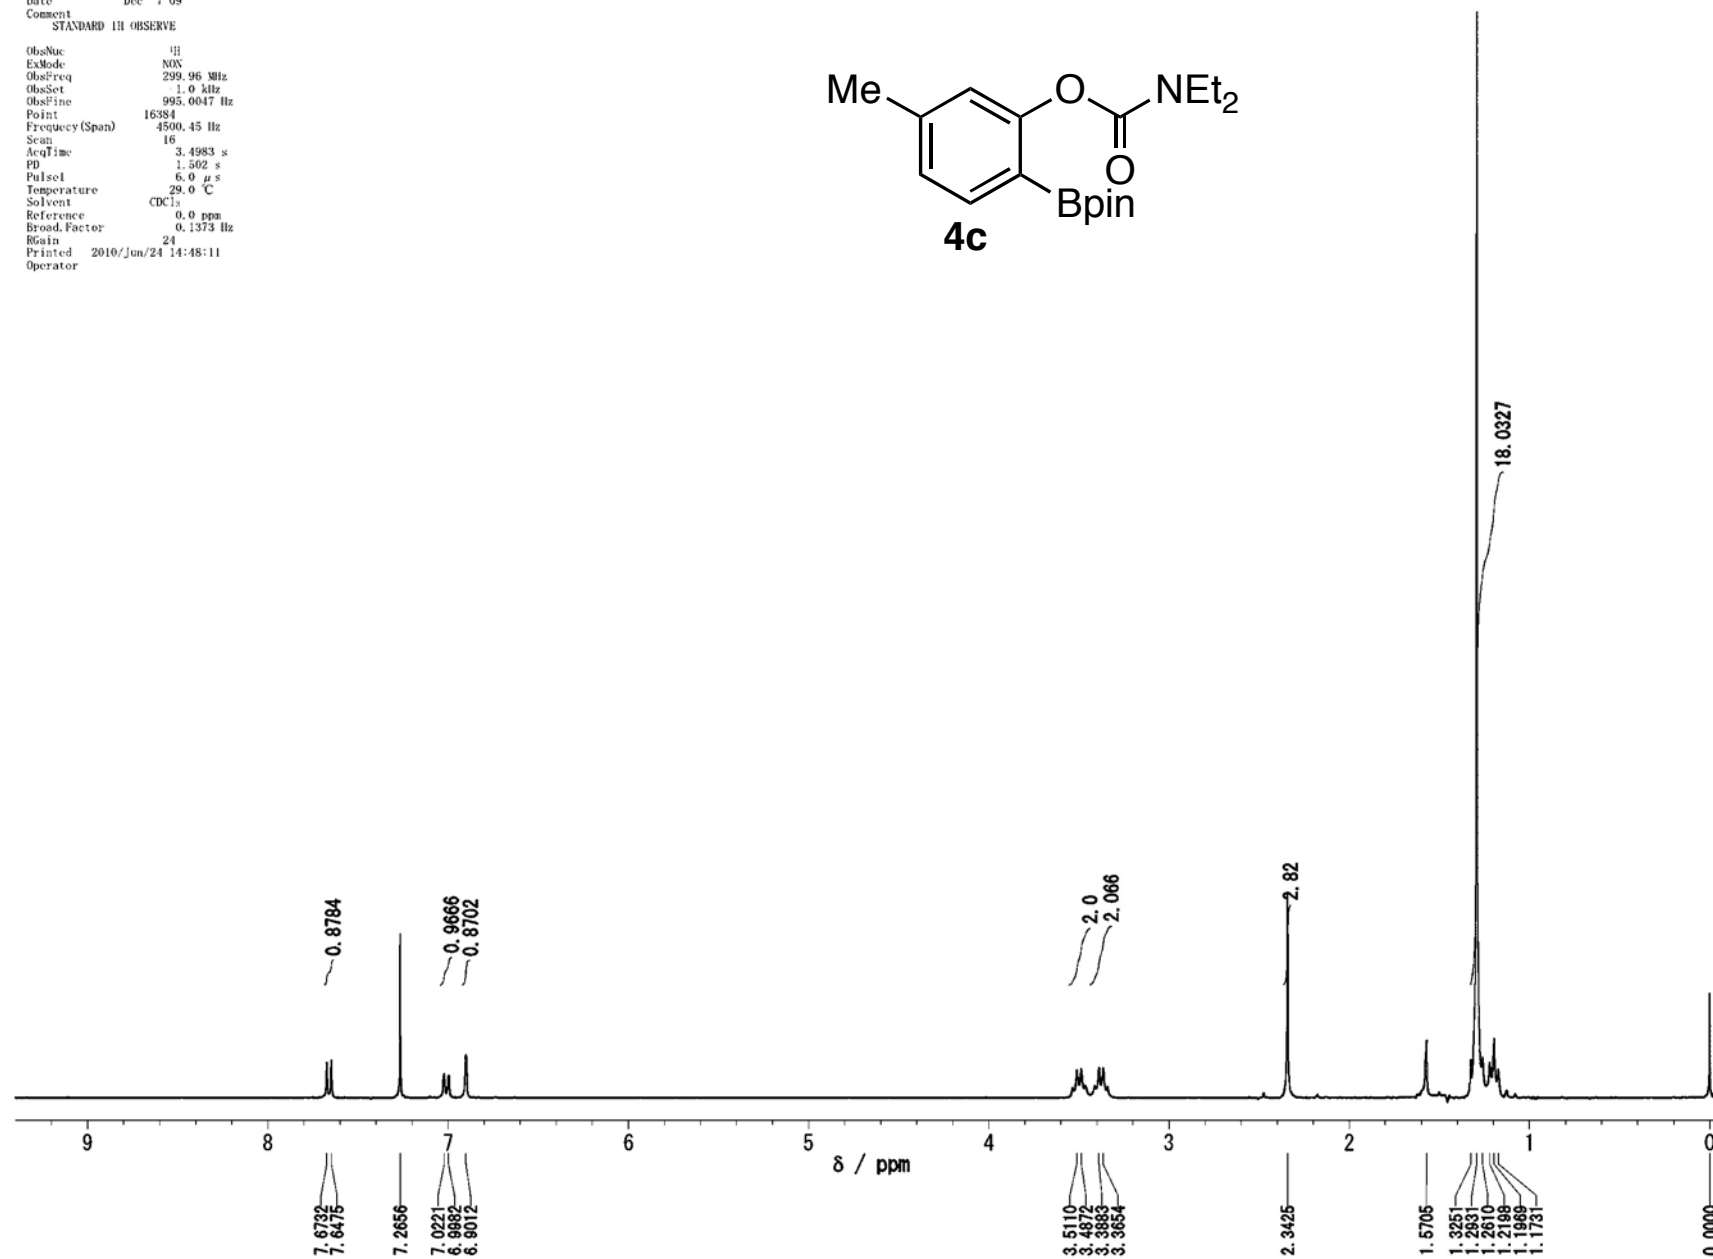

Original File:  
 Date Feb 19 10  
 Comment  
 C13 Standard Observe  
 Stick:none Tune=6.4 Match=0.4  
 ObsNuc <sup>13</sup>C  
 ExMode NON  
 ObsFreq 75.43 MHz  
 ObsSet 1.0 kHz  
 ObsFine 996.3672 Hz  
 Point 32768  
 Frequency (Span) 18761.73 Hz  
 Scan 128  
 AcqTime 1.4992 s  
 PD 1.501 s  
 Pulse 6.0 μs  
 Temperature 29.0 °C  
 Solvent CDCl<sub>3</sub>  
 Reference 77.0 ppm  
 Broad.Factor 0.2863 Hz  
 RGain 30  
 Printed 2010/May/02 13:16:55  
 Operator

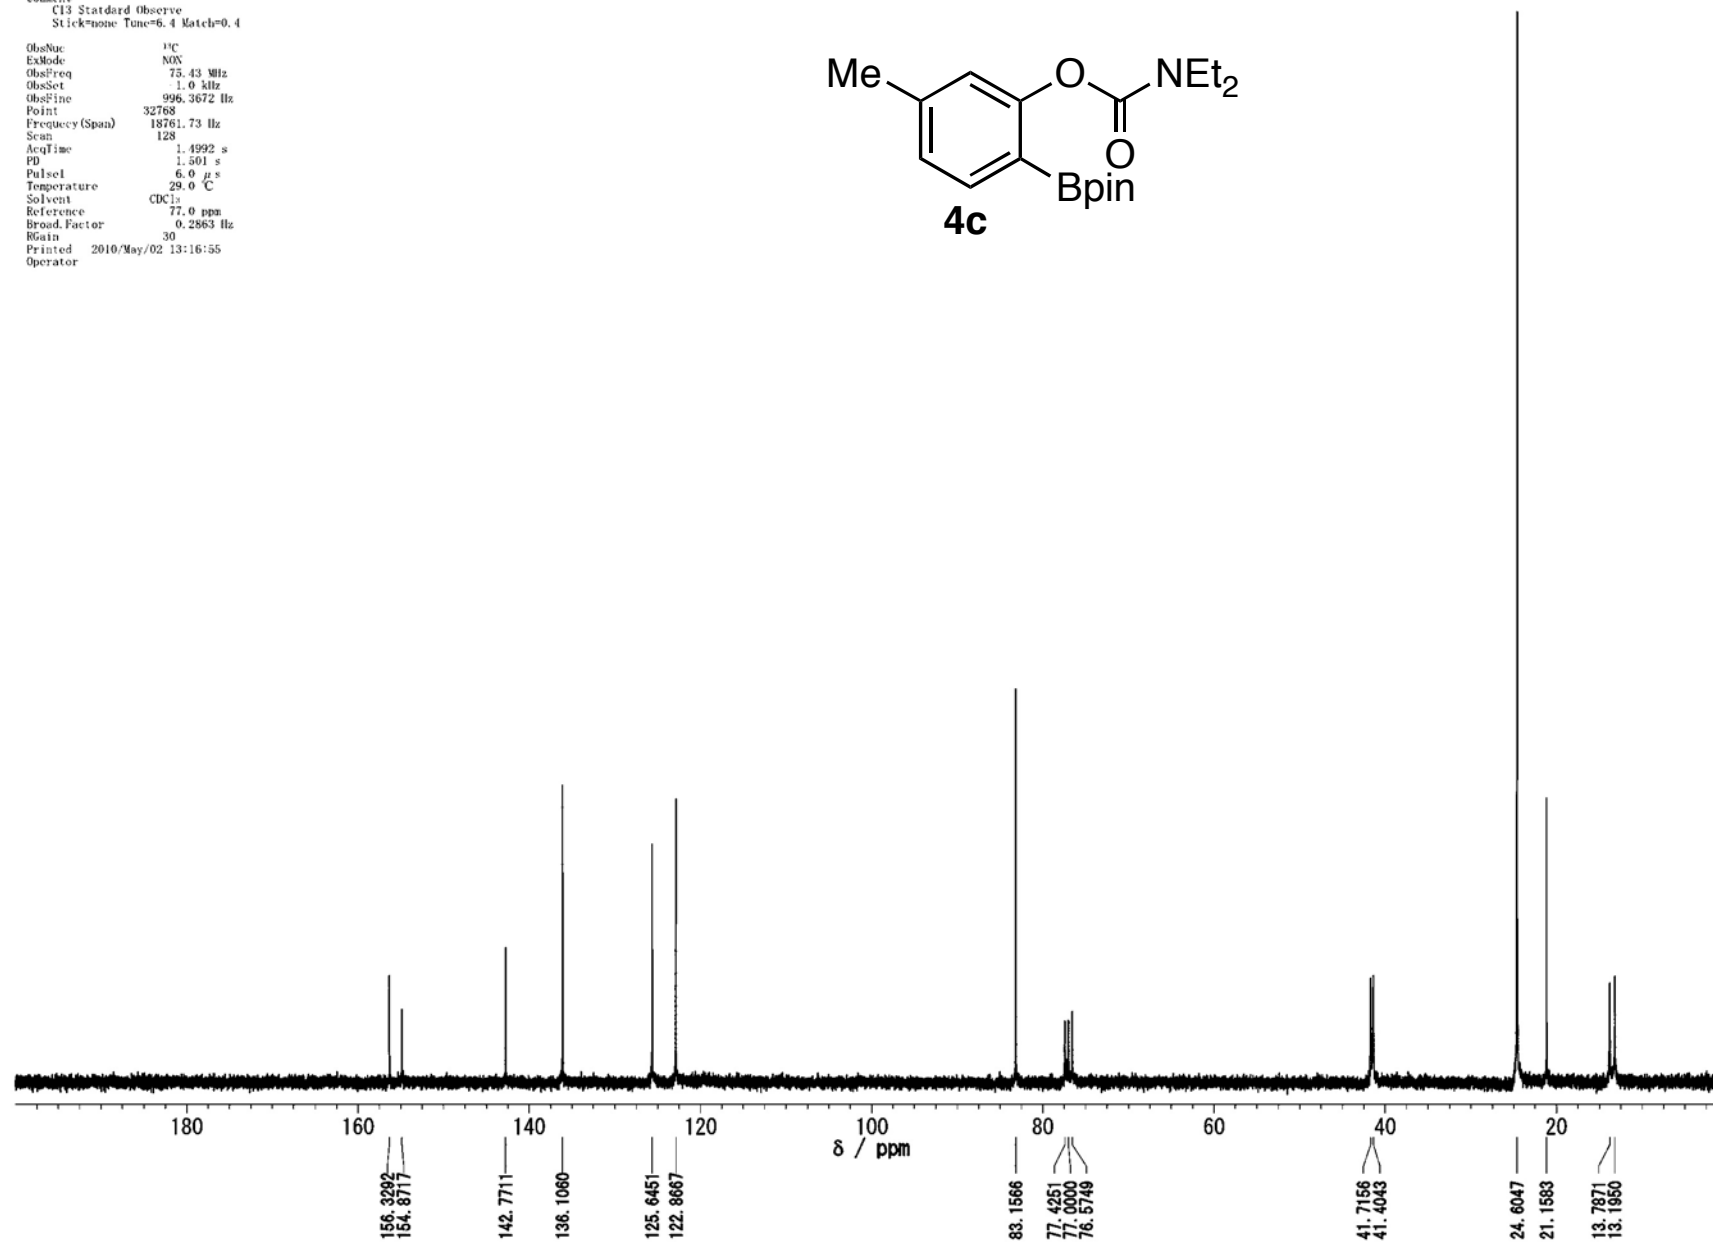

Original File:  
 Date Nov 28 09  
 Comment  
 STANDARD IN OBSERVE

ObsNuc <sup>1</sup>H  
 ExMode NON  
 ObsFreq 299.96 MHz  
 ObsSet 1.0 kHz  
 ObsFine 995.0047 Hz  
 Point 16384  
 Frequency (Span) 4500.45 Hz  
 Scan 16  
 AcqTime 3.4983 s  
 PD 1.502 s  
 Pulse 6.0  $\mu$ s  
 Temperature 29.0  $^{\circ}$ C  
 Solvent CDCl<sub>3</sub>  
 Reference 0.0 ppm  
 Broad Factor 0.1373 Hz  
 RGain 20  
 Printed 2010/May/02 13:20:56  
 Operator

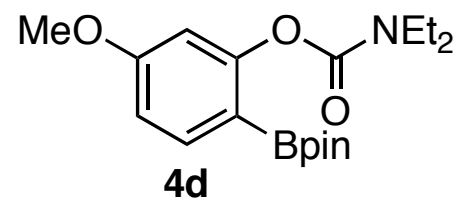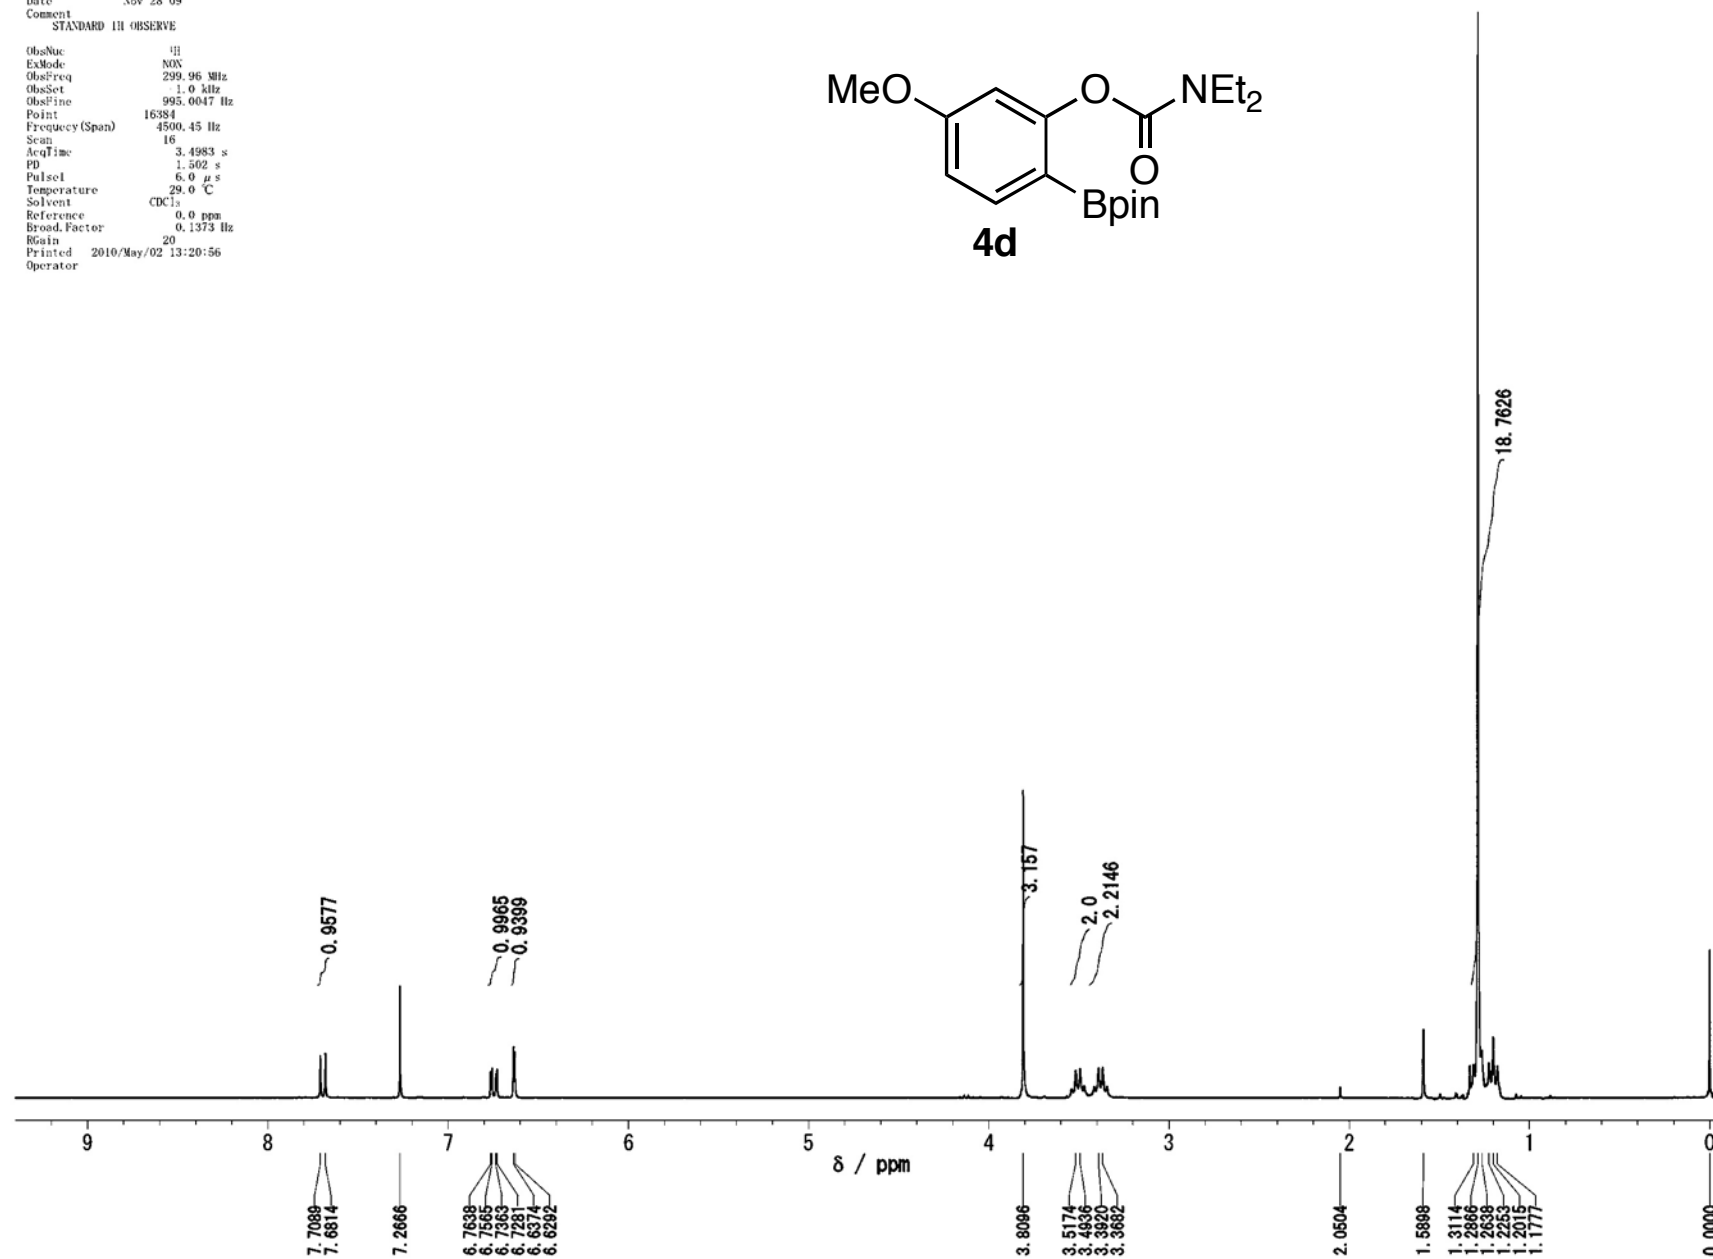

Original File:  
 Date Feb 20 10  
 Comment  
 C13 Standard Observe  
 Stick=none Tune=6.4 Match=0.4  
 ObsNuc <sup>13</sup>C  
 ExMode NON  
 ObsFreq 75.43 MHz  
 ObsSet 1.0 kHz  
 ObsFine 996.3672 Hz  
 Point 32768  
 Frequency (Span) 18761.73 Hz  
 Scan 128  
 AcqTime 1.4992 s  
 PD 1.501 s  
 Pulse 6.0 μs  
 Temperature 29.0 °C  
 Solvent CDCl<sub>3</sub>  
 Reference 77.0 ppm  
 Broad.Factor 0.2863 Hz  
 RGain 30  
 Printed 2010/May/02 13:24:48  
 Operator

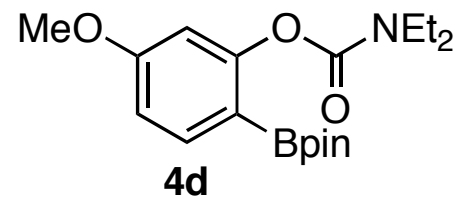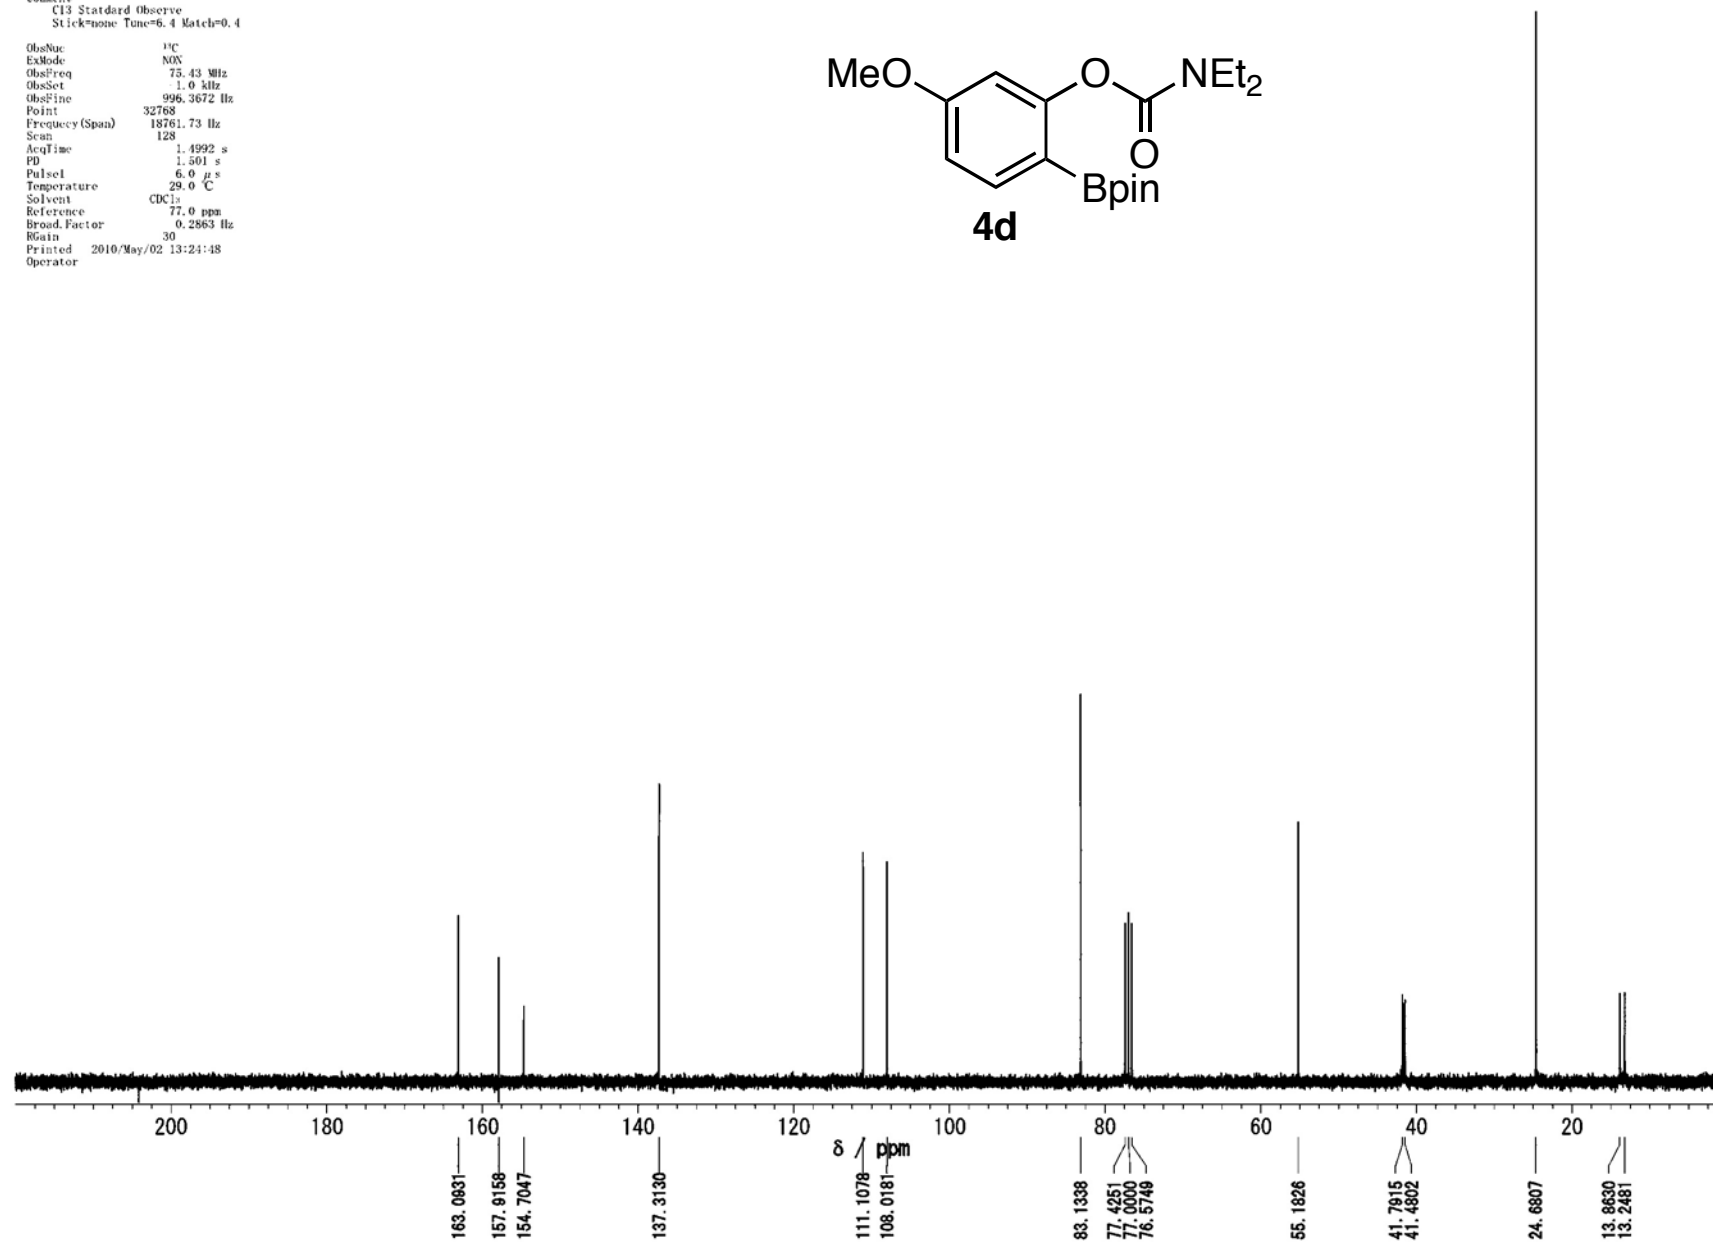

Original File:   
 Date Nov 27 09   
 Comment STANDARD IN OBSERVE   
 ObsNuc <sup>1</sup>H   
 ExMode NON   
 ObsFreq 299.96 MHz   
 ObsSet 1.0 kHz   
 ObsFine 995.0047 Hz   
 Point 16384   
 Frequency (Span) 4500.45 Hz   
 Scan 16   
 AcqTime 3.4983 s   
 PD 1.502 s   
 Pulse 6.0  $\mu$ s   
 Temperature 29.0  $^{\circ}$ C   
 Solvent CDCl<sub>3</sub>   
 Reference 0.0 ppm   
 Broad Factor 0.1373 Hz   
 RGain 30   
 Printed 2010/May/02 13:29:56   
 Operator

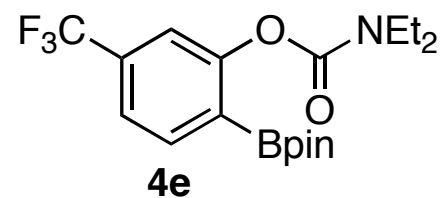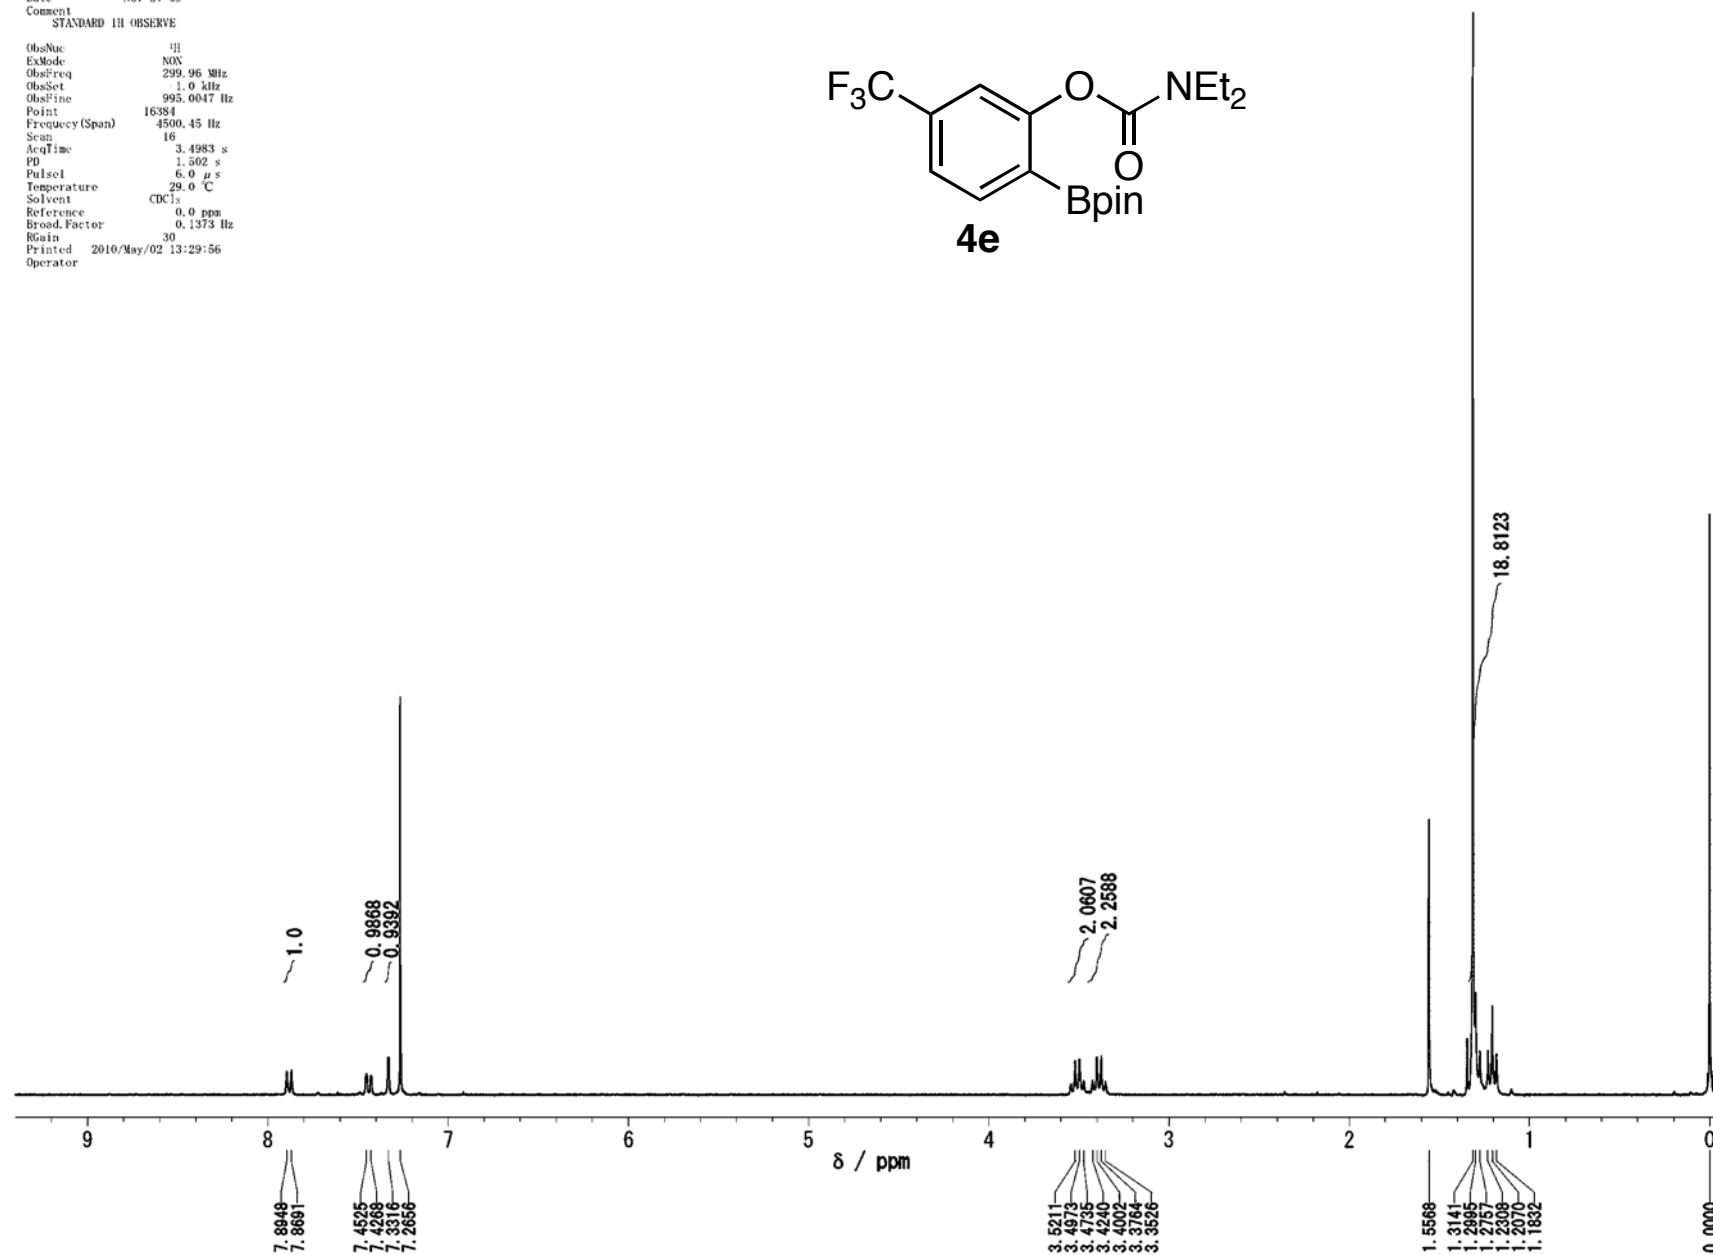

Original File:  
 Date 09/Nov/2027 00:00:00  
 Comment  
 C13 Standard Observe  
 Stick=none Tune=6.4 Match=0.4

ObsNuc  $^{13}\text{C}$   
 ExMode NON  
 ObsFreq 75.43 MHz  
 ObsSet 1.0 kHz  
 ObsFine 996.3672 Hz  
 Point 32768  
 Frequency (Span) 18761.73 Hz  
 Scan 320  
 AcqTime 1.4992 s  
 PD 1.501 s  
 Pulse 6.0  $\mu\text{s}$   
 Temperature 29.0  $^{\circ}\text{C}$   
 Solvent  $\text{CDCl}_3$   
 Reference 77.0 ppm  
 Broad Factor 0.2863 Hz  
 RGain 30  
 Printed 2010/Jun/24 14:53:39  
 Operator

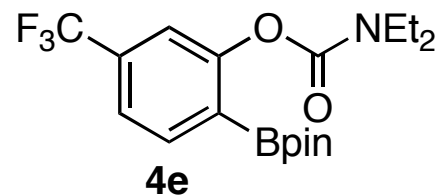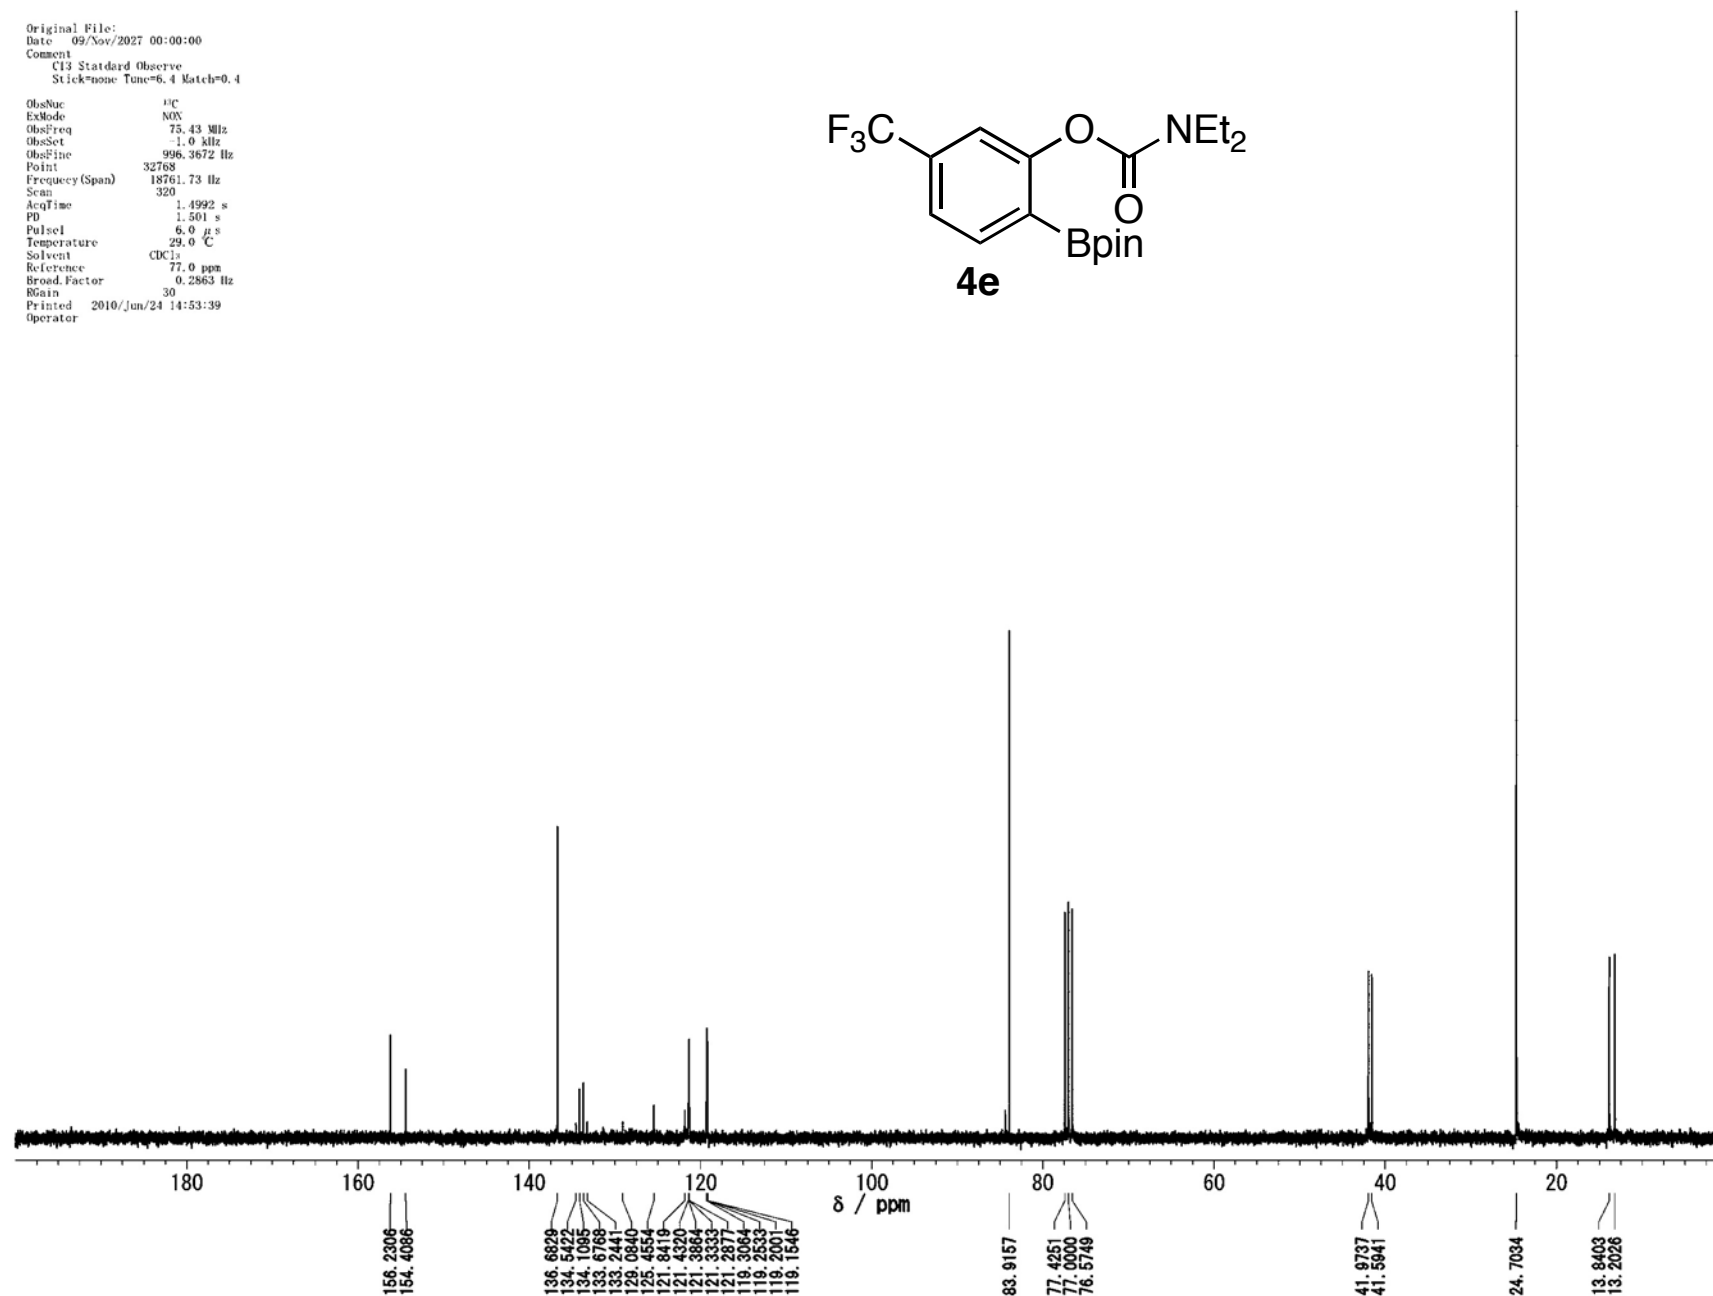

Original File:  
 Date Nov 27 09  
 Comment  
 STANDARD IN OBSERVE

ObsNuc <sup>1</sup>H  
 ExMode NON  
 ObsFreq 299.96 MHz  
 ObsSet 1.0 kHz  
 ObsFine 995.0047 Hz  
 Point 16384  
 Frequency (Span) 4500.45 Hz  
 Scan 16  
 AcqTime 3.4983 s  
 PD 1.502 s  
 Pulse 6.0  $\mu$ s  
 Temperature 29.0  $^{\circ}$ C  
 Solvent CDCl<sub>3</sub>  
 Reference 0.0 ppm  
 Broad Factor 0.1373 Hz  
 RGain 24  
 Printed 2010/May/02 14:25:17  
 Operator

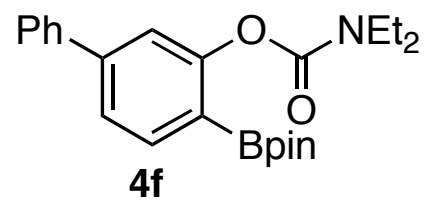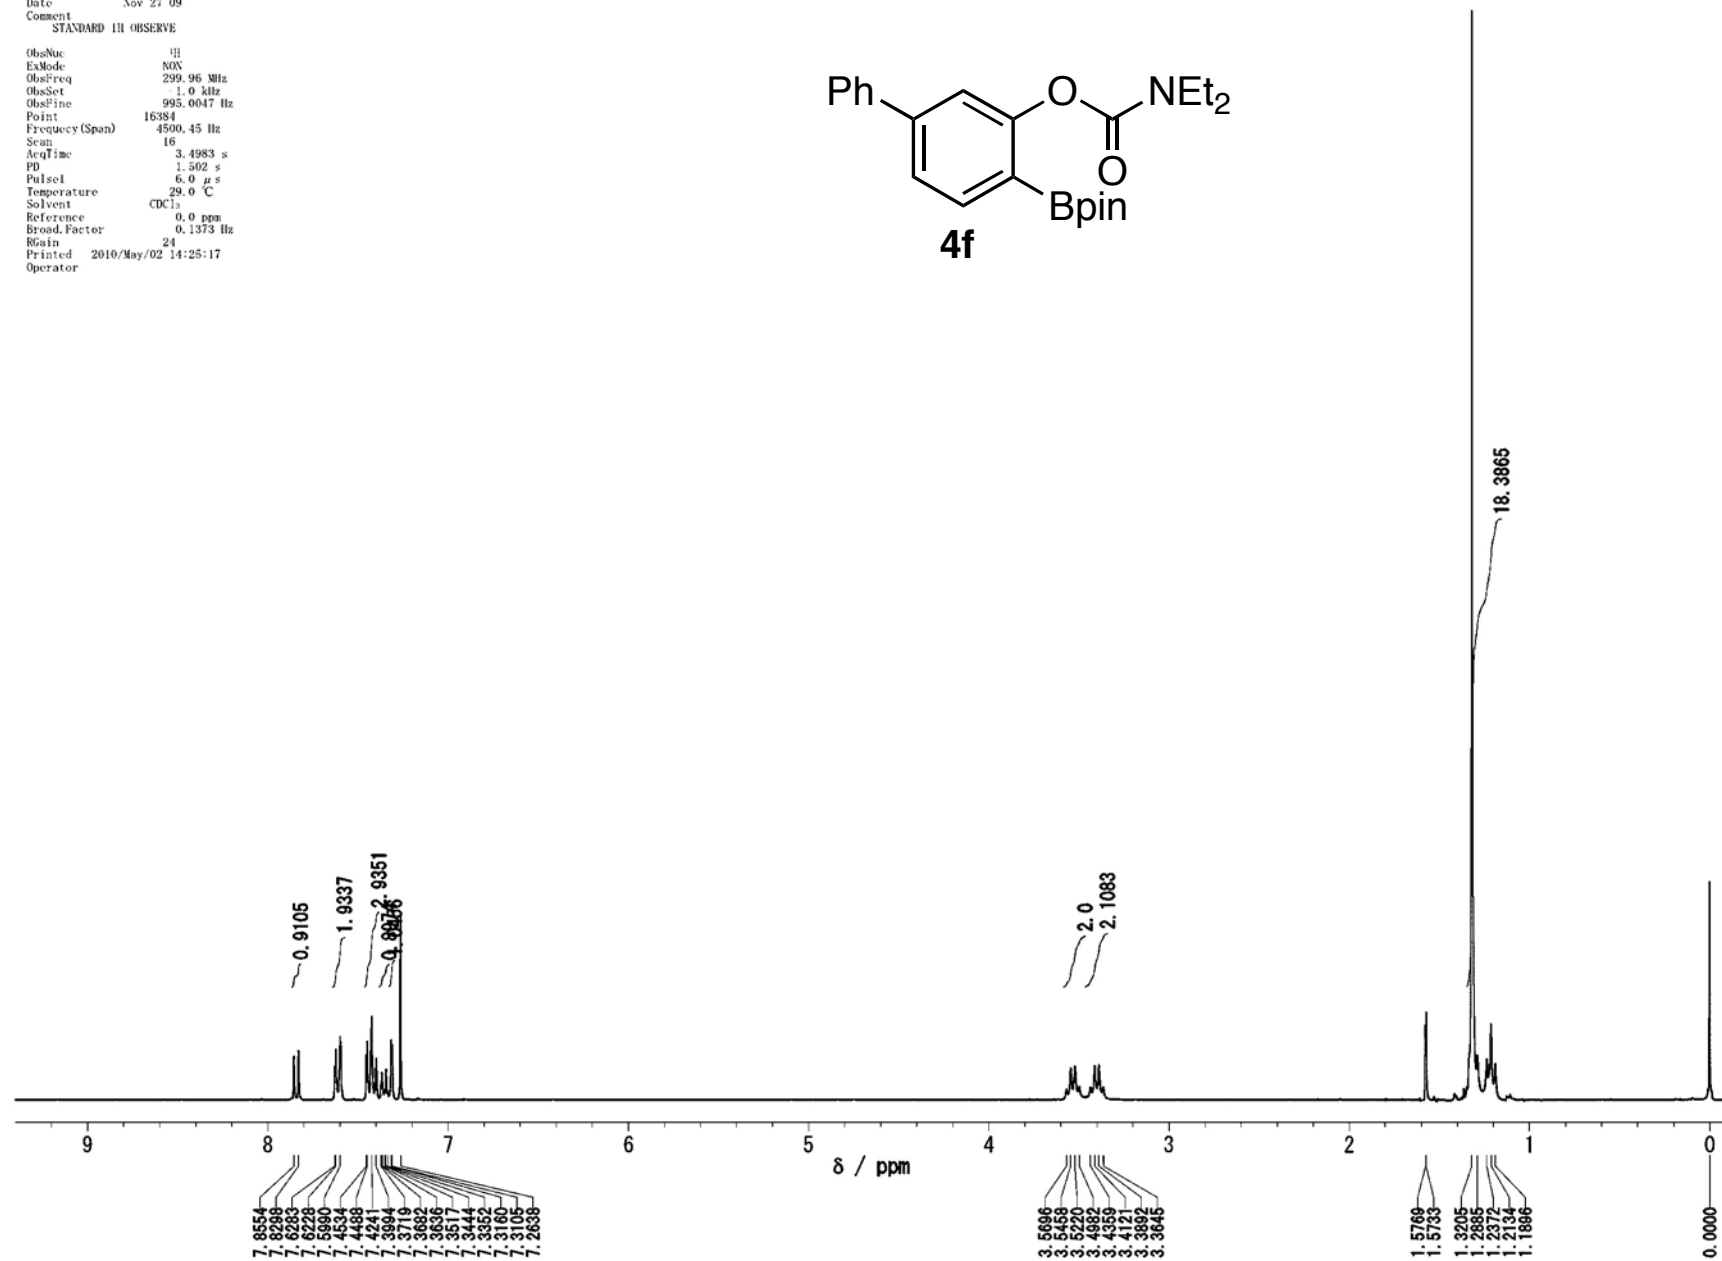



Original File:  
 Date Feb 22 10  
 Comment  
 C13 Standard Observe  
 Stick=none Tune=6.4 Match=0.4  
 ObsNuc <sup>13</sup>C  
 ExMode NON  
 ObsFreq 75.43 MHz  
 ObsSet 1.0 kHz  
 ObsFine 996.3672 Hz  
 Point 32768  
 Frequency (Span) 18761.73 Hz  
 Scan 128  
 AcqTime 1.4992 s  
 PD 1.501 s  
 Pulse 6.0  $\mu$ s  
 Temperature 29.0  $^{\circ}$ C  
 Solvent CDCl<sub>3</sub>  
 Reference 77.0 ppm  
 Broad.Factor 0.2863 Hz  
 RGain 30  
 Printed 2010/May/02 14:27:17  
 Operator

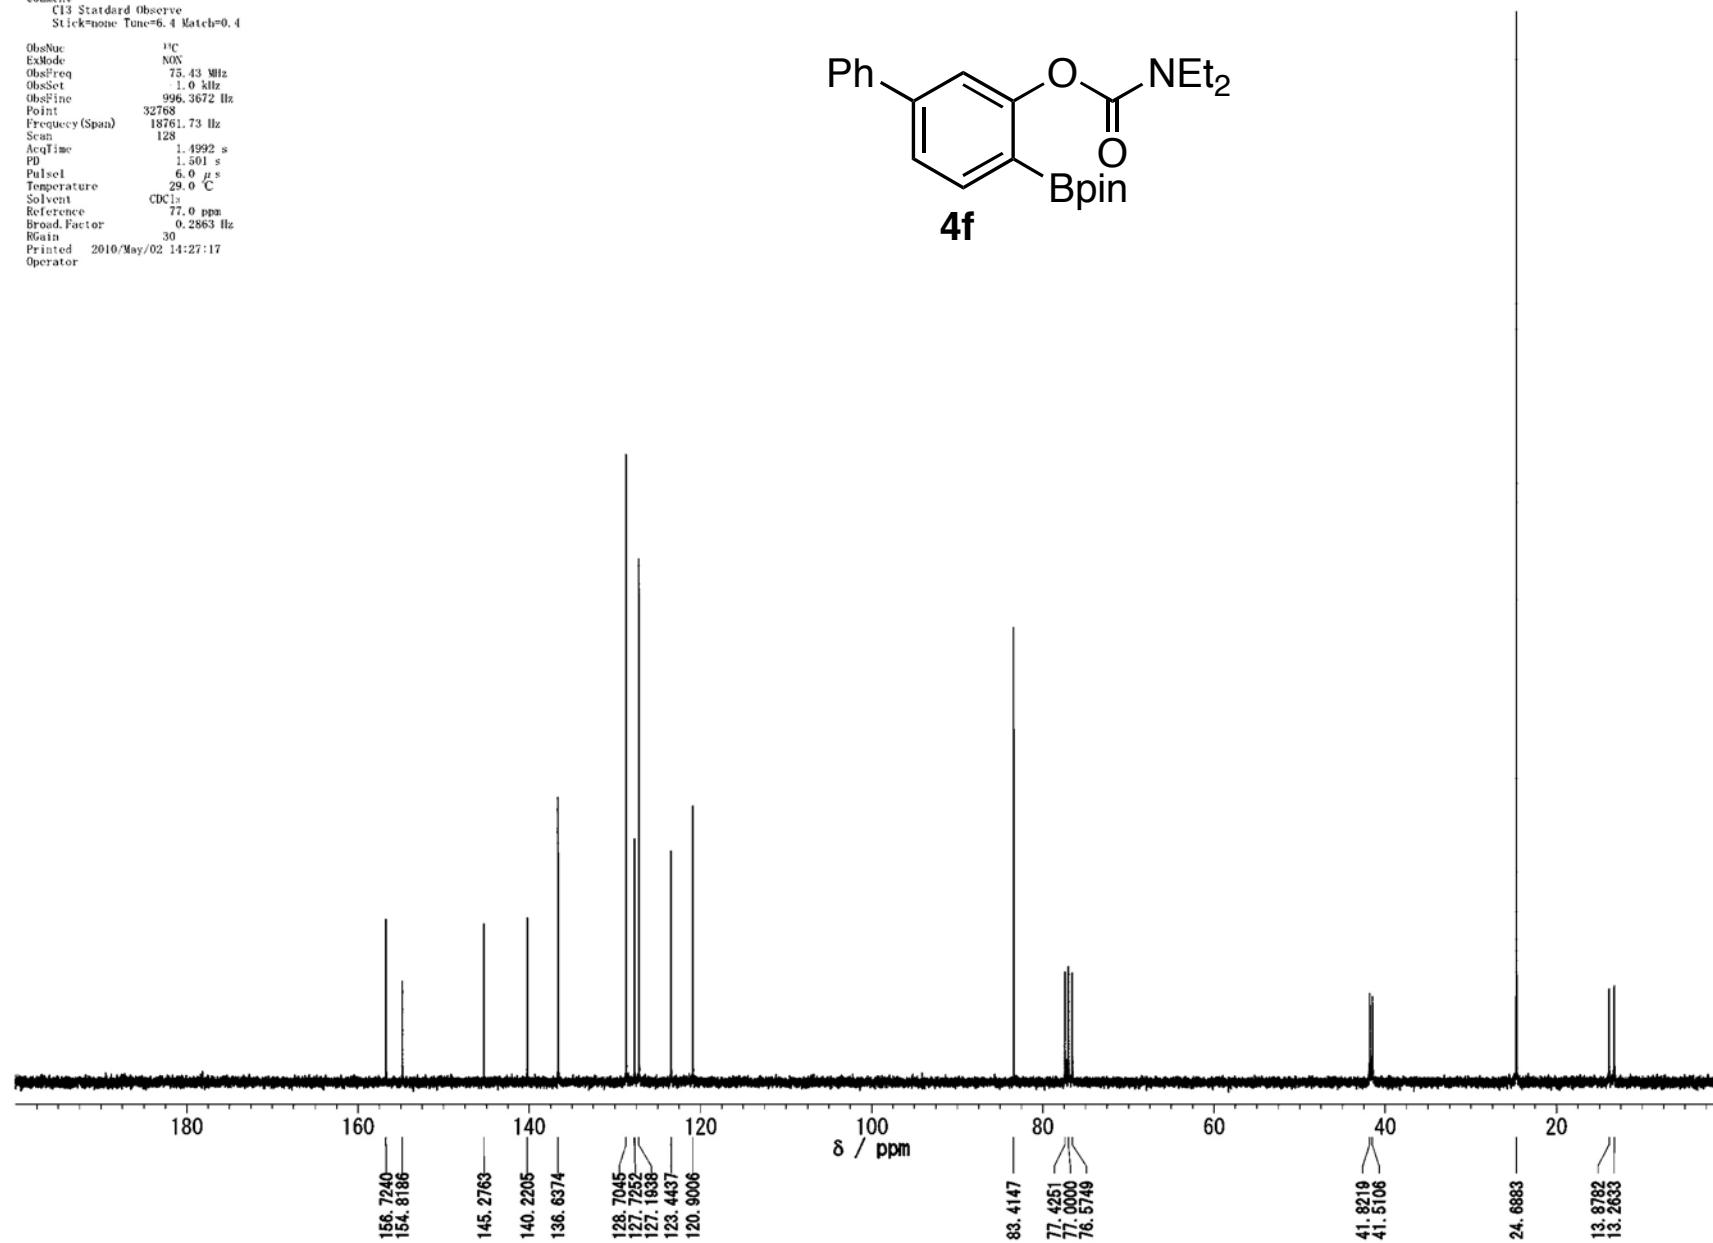

Original File:   
 Date Dec 8 09   
 Comment   
 STANDARD IN OBSERVE   
 ObsNuc <sup>1</sup>H   
 ExMode NON   
 ObsFreq 299.96 MHz   
 ObsSet 1.0 kHz   
 ObsPine 995.0047 Hz   
 Point 16384   
 Frequency (Span) 4500.45 Hz   
 Scan 16   
 AcqTime 3.4983 s   
 PD 1.502 s   
 Pulse 6.0  $\mu$ s   
 Temperature 29.0  $^{\circ}$ C   
 Solvent CDCl<sub>3</sub>   
 Reference 0.0 ppm   
 Broad Factor 0.1373 Hz   
 RGain 24   
 Printed 2010/May/02 14:32:26   
 Operator

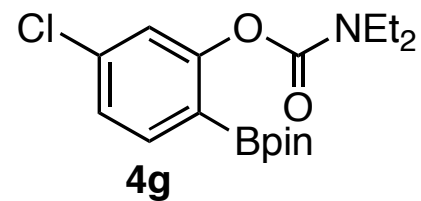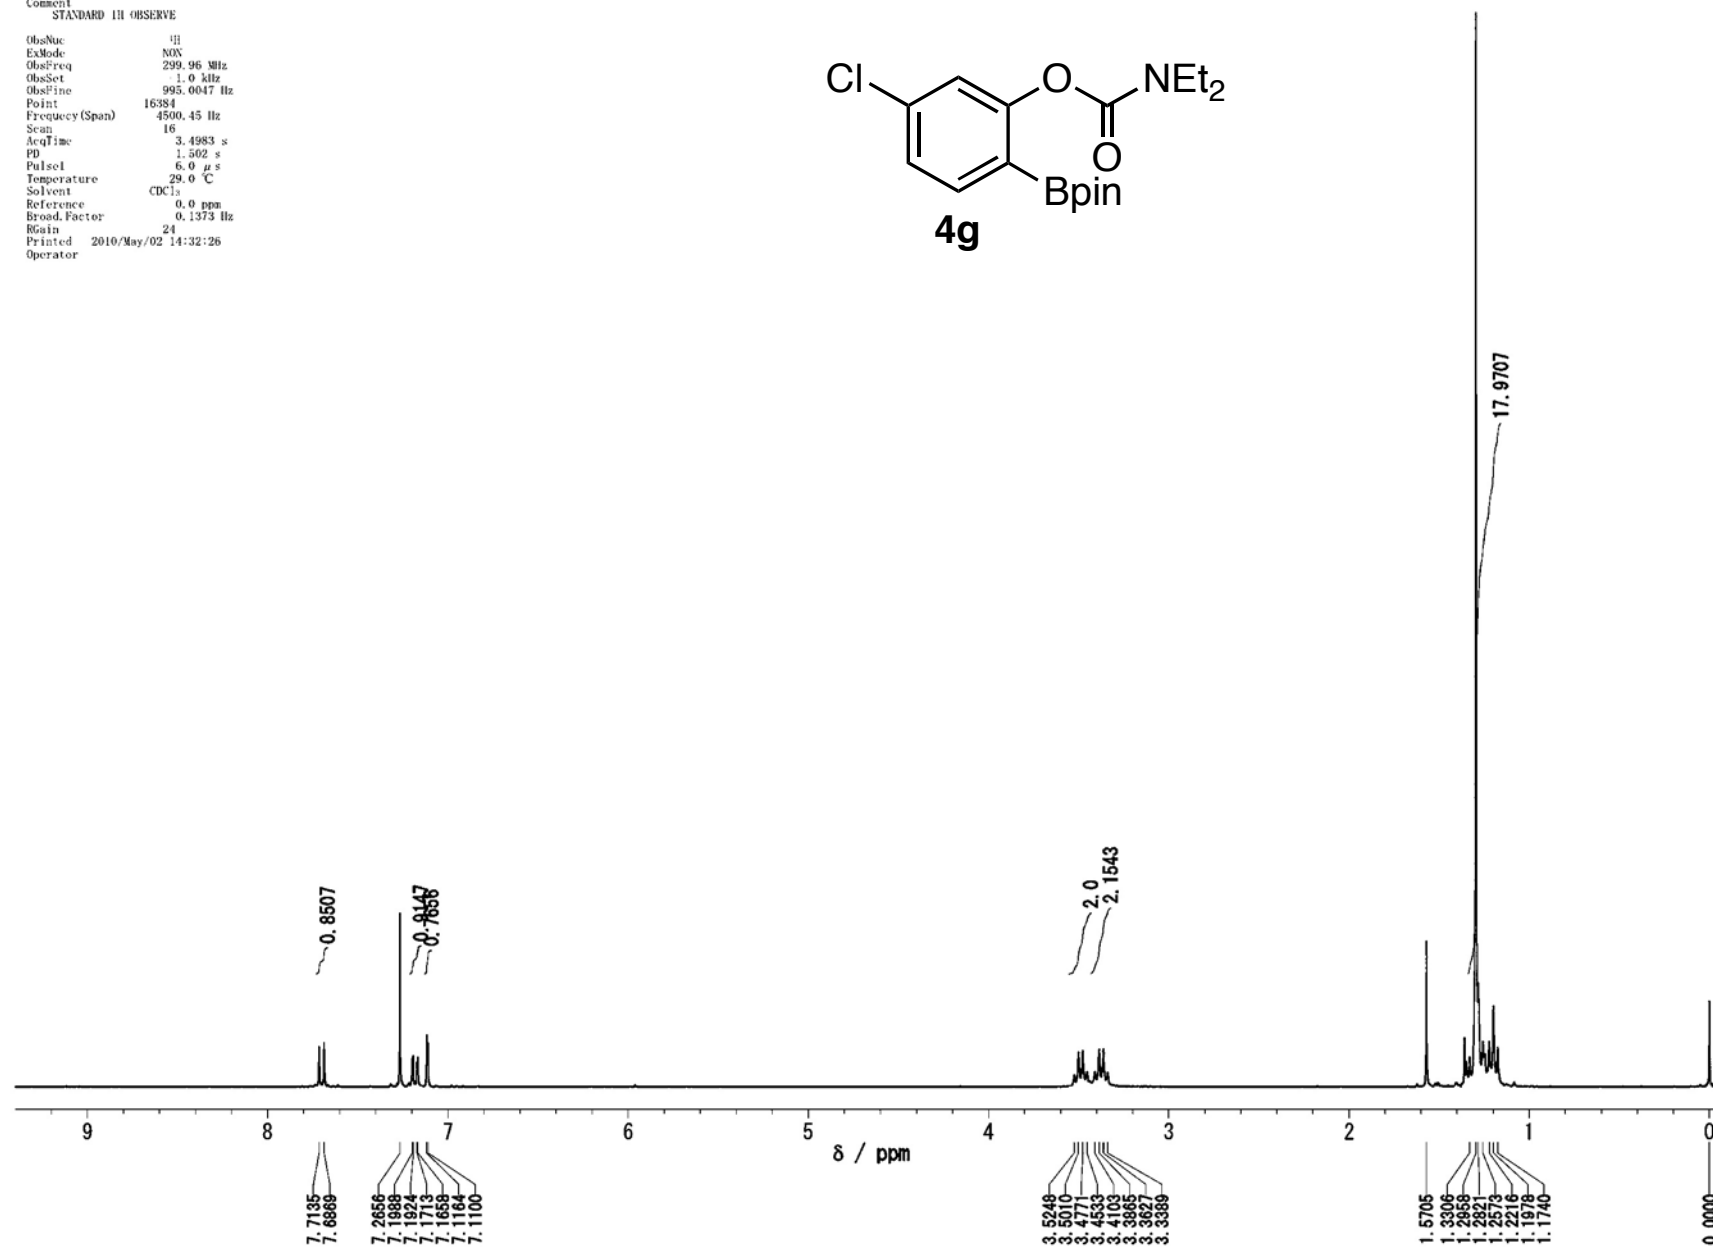

Original File:  
 Date Feb 20 10  
 Comment  
 C13 Standard Observe  
 Stick=none Tune=6.4 Match=0.4  
 ObsNuc <sup>13</sup>C  
 ExMode NON  
 ObsFreq 75.43 MHz  
 ObsSet 1.0 kHz  
 ObsFine 996.3672 Hz  
 Point 32768  
 Frequency (Span) 18761.73 Hz  
 Scan 64  
 AcqTime 1.4992 s  
 PD 1.501 s  
 Pulse 6.0  $\mu$ s  
 Temperature 29.0  $^{\circ}$ C  
 Solvent CDCl<sub>3</sub>  
 Reference 77.0 ppm  
 Broad.Factor 0.2863 Hz  
 RGain 30  
 Printed 2010/May/02 14:33:48  
 Operator

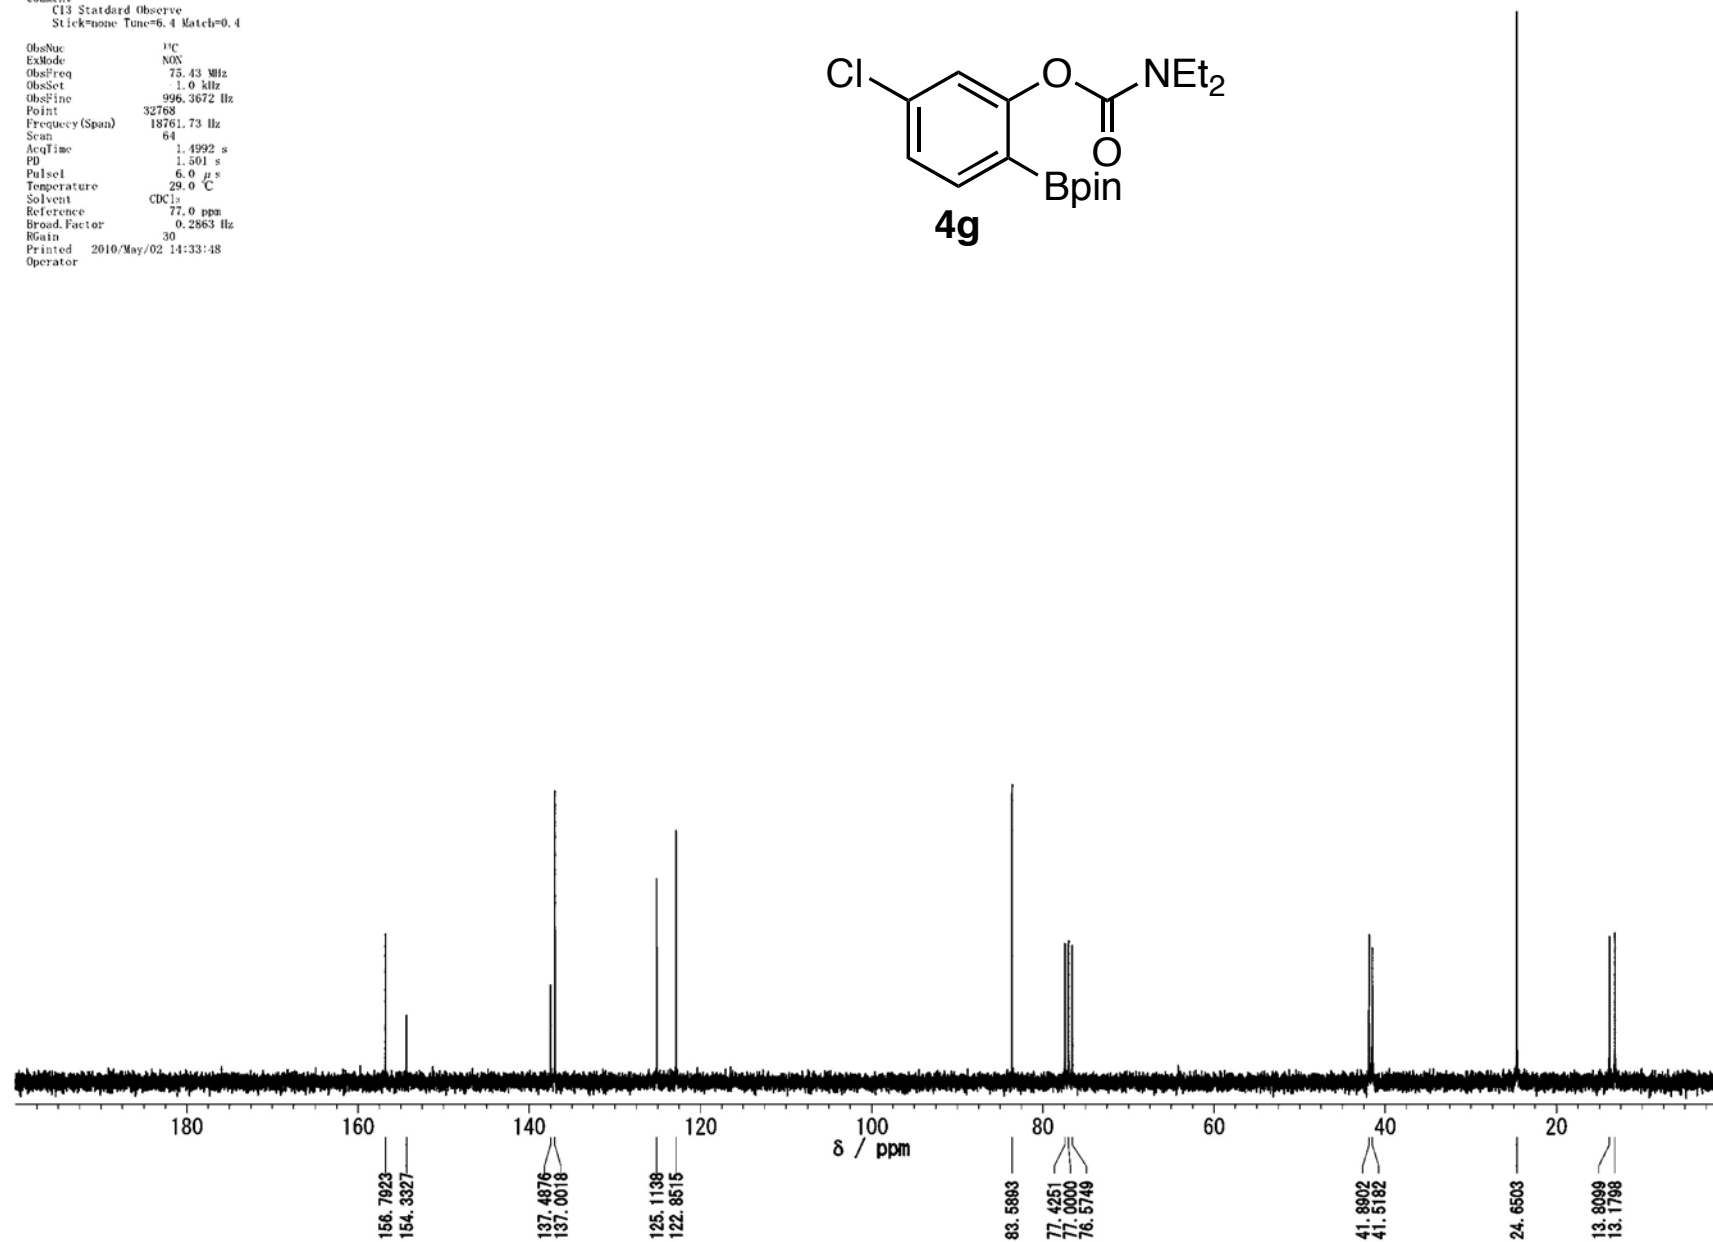

Original File:  
 Date Feb 23 10  
 Comment  
 STANDARD IN OBSERVE

ObsNuc <sup>1</sup>H  
 ExMode NON  
 ObsFreq 299.96 MHz  
 ObsSet 1.0 kHz  
 ObsFine 995.0047 Hz  
 Point 16384  
 Frequency (Span) 4500.45 Hz  
 Scan 16  
 AcqTime 3.4983 s  
 PD 1.502 s  
 Pulse 6.0  $\mu$ s  
 Temperature 29.0  $^{\circ}$ C  
 Solvent CDCl<sub>3</sub>  
 Reference 0.0 ppm  
 Broad Factor 0.1373 Hz  
 RGain 30  
 Printed 2010/May/02 14:38:14  
 Operator

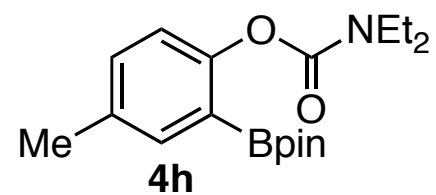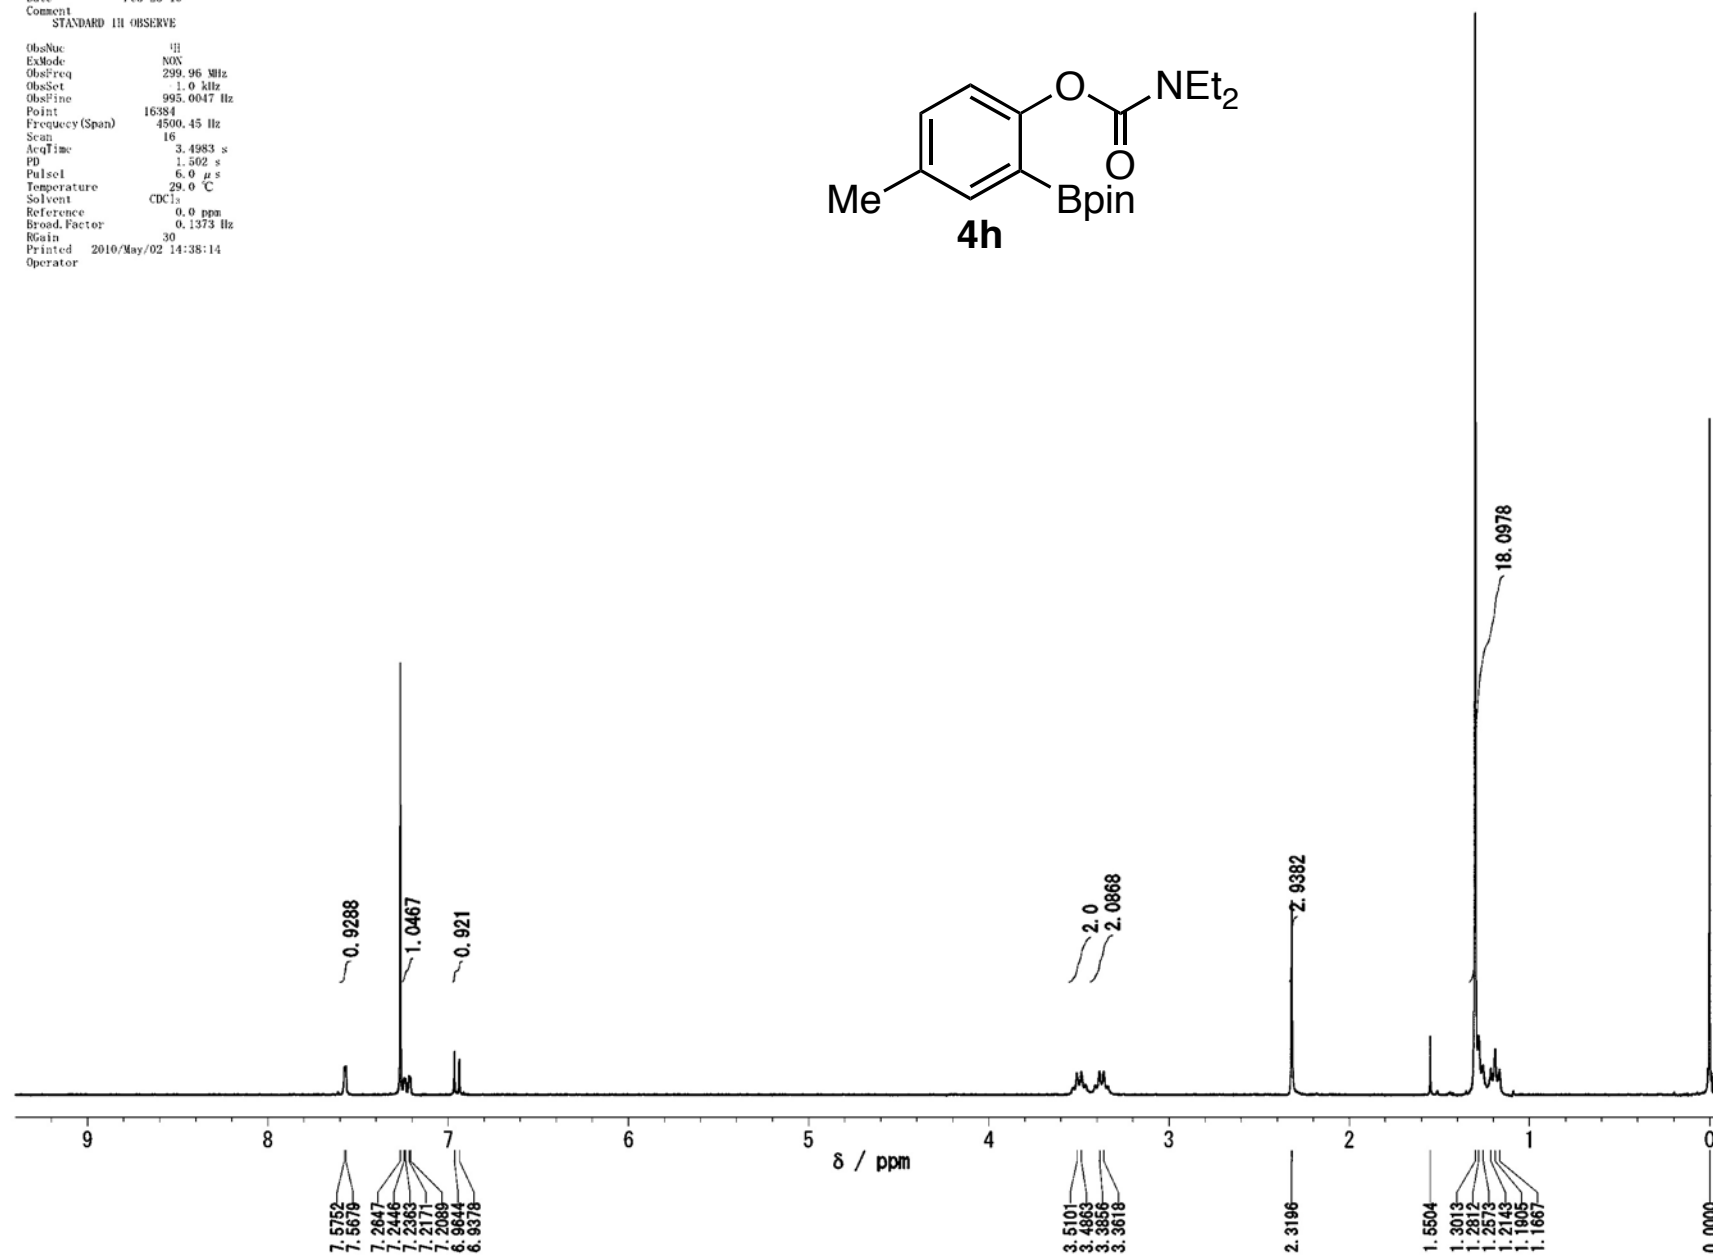

Original File:  
 Date Feb 27 10  
 Comment  
 C13 Standard Observe  
 Stick=none Tune=6.4 Match=0.4

ObsNuc  $^{13}\text{C}$   
 ExMode NON  
 ObsFreq 75.43 MHz  
 ObsSet 1.0 kHz  
 ObsFine 996.3672 Hz  
 Point 32768  
 Frequency (Span) 18761.73 Hz  
 Scan 256  
 AcqTime 1.4992 s  
 PD 1.501 s  
 Pulse1 6.0  $\mu\text{s}$   
 Temperature 29.0  $^{\circ}\text{C}$   
 Solvent  $\text{CDCl}_3$   
 Reference 77.0 ppm  
 Broad.Factor 0.2863 Hz  
 RGain 30  
 Printed 2010/May/02 14:42:12  
 Operator

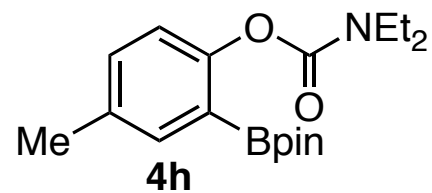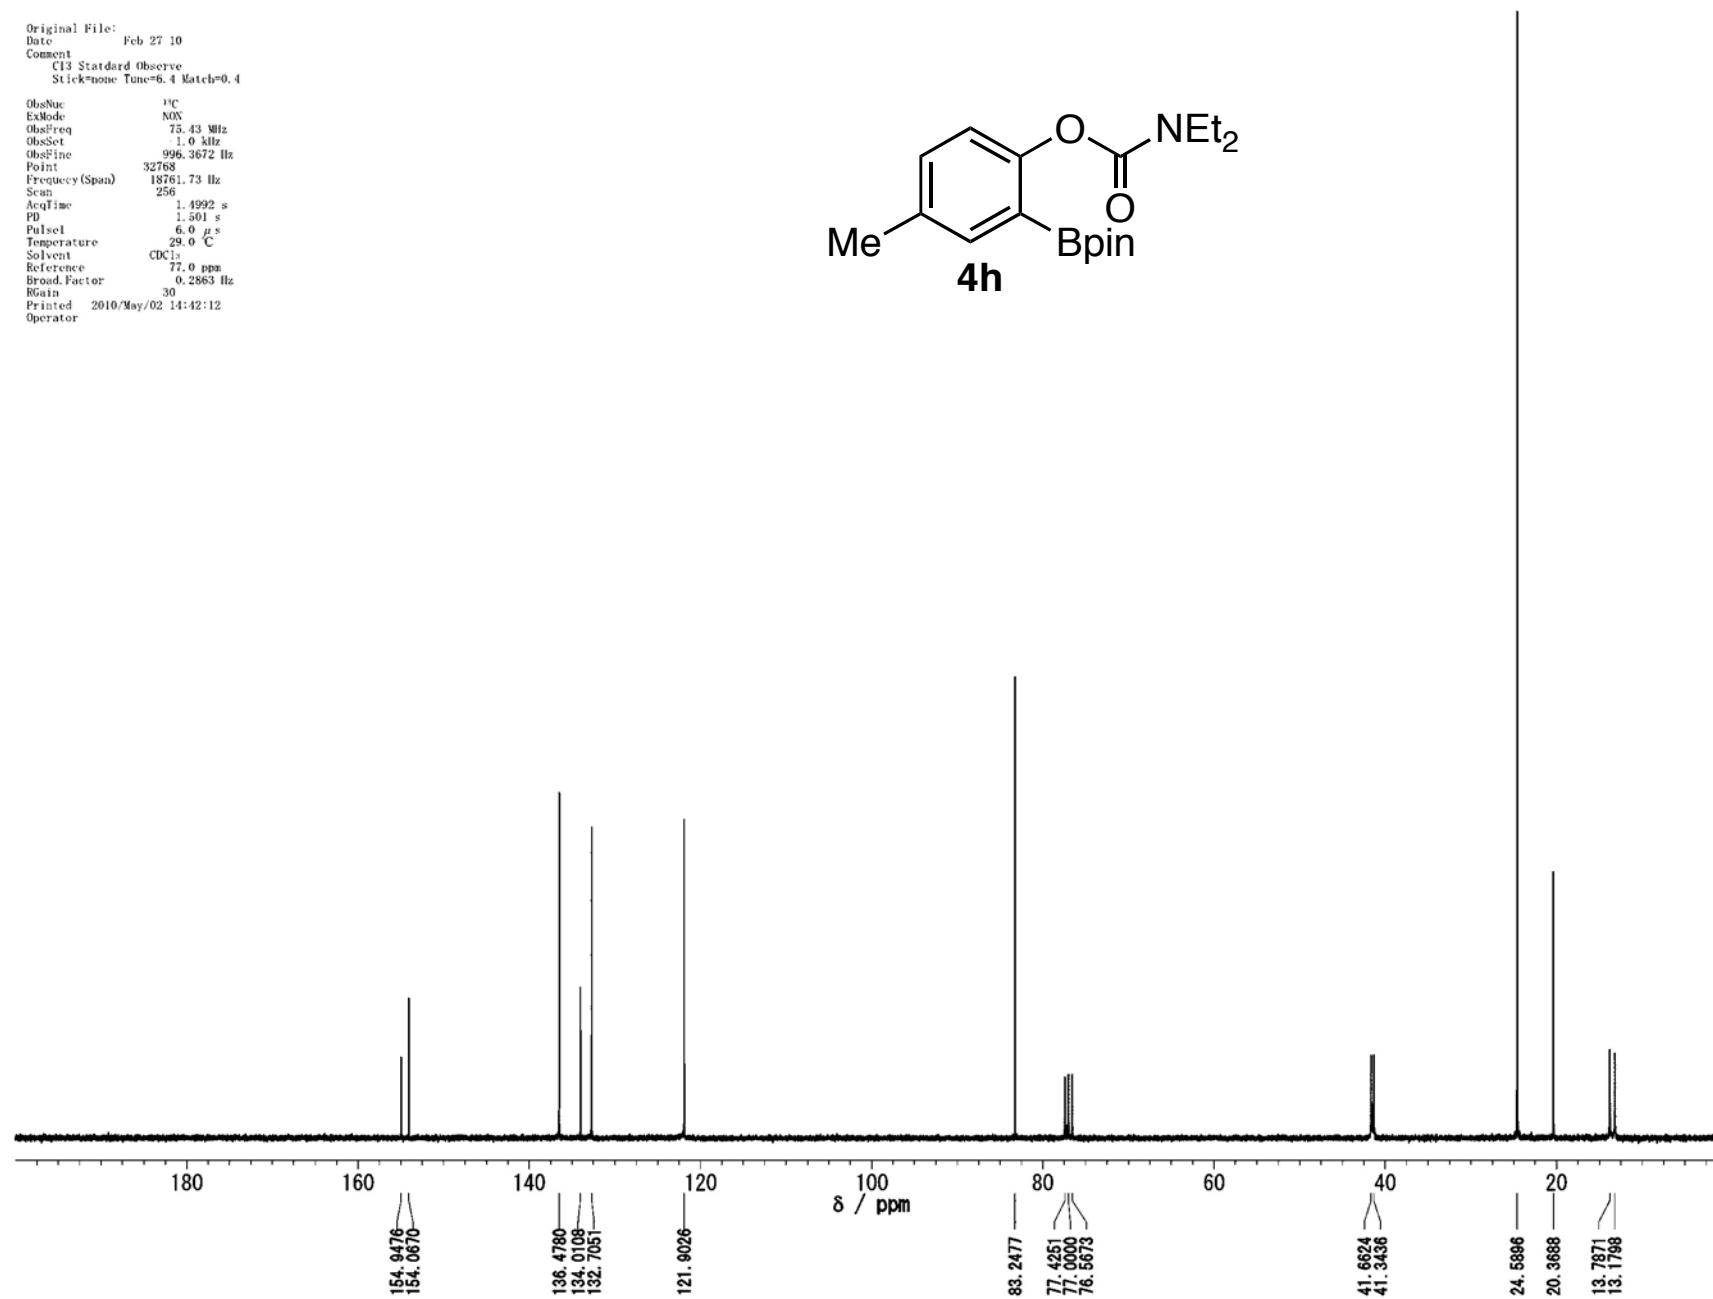

Original File:  
 Date Oct 21 09  
 Comment  
 STANDARD IN OBSERVE

ObsNuc <sup>1</sup>H  
 ExMode NON  
 ObsFreq 299.96 MHz  
 ObsSet 1.0 kHz  
 ObsFine 995.0047 Hz  
 Point 16384  
 Frequency (Span) 4500.45 Hz  
 Scan 16  
 AcqTime 3.4983 s  
 PD 1.502 s  
 Pulse 6.0  $\mu$ s  
 Temperature 29.0  $^{\circ}$ C  
 Solvent CDCl<sub>3</sub>  
 Reference 0.0 ppm  
 Broad Factor 0.1373 Hz  
 RGain 30  
 Printed 2010/Jun/24 14:56:54  
 Operator

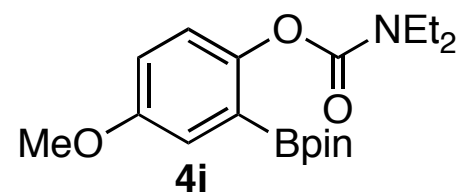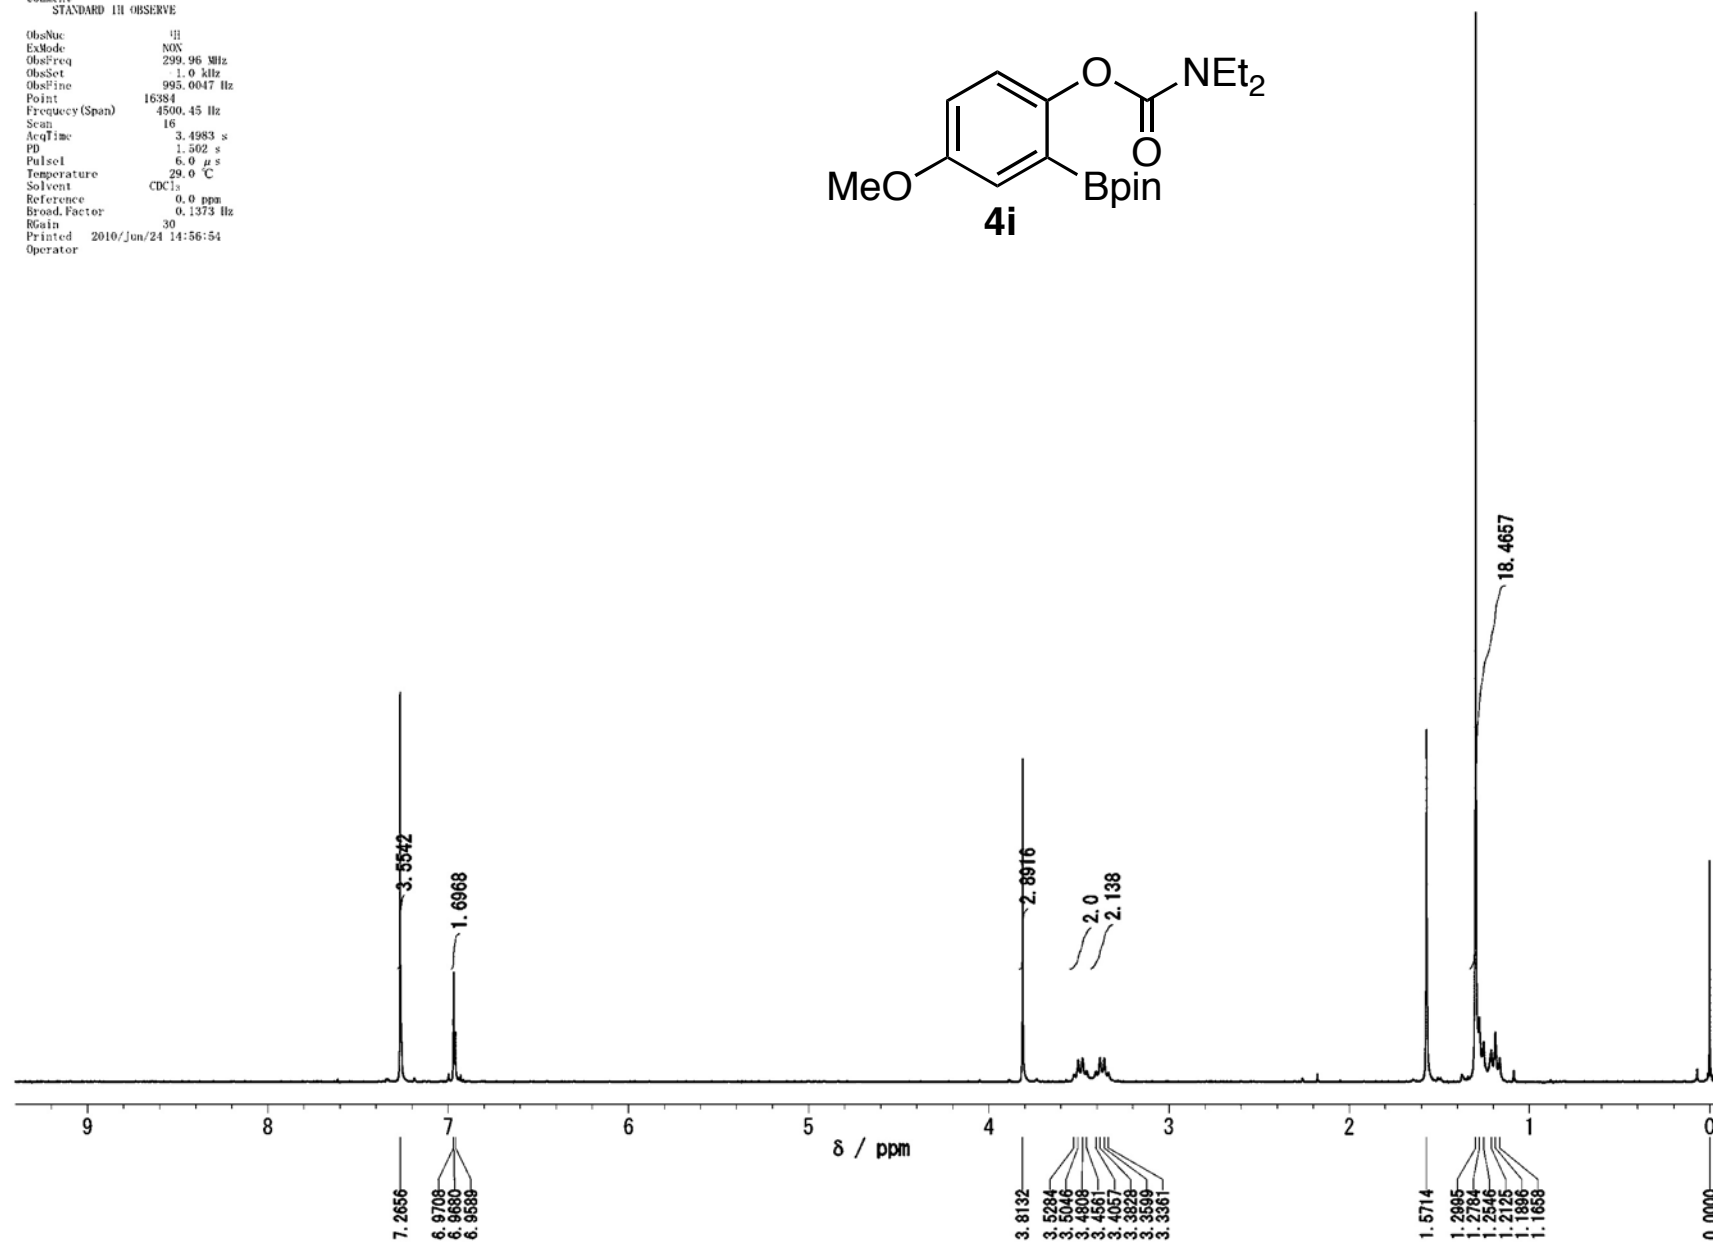

Original File:  
 Date Feb 18 10  
 Comment  
 C13 Standard Observe  
 Stick=none Tune=6.4 Match=0.4

ObsNuc  $^{13}\text{C}$   
 ExMode NON  
 ObsFreq 75.43 MHz  
 ObsSet 1.0 kHz  
 ObsFine 996.3672 Hz  
 Point 32768  
 Frequency (Span) 18761.73 Hz  
 Scan 128  
 AcqTime 1.4992 s  
 PD 1.501 s  
 Pulse 6.0  $\mu\text{s}$   
 Temperature 29.0  $^{\circ}\text{C}$   
 Solvent  $\text{CDCl}_3$   
 Reference 77.0 ppm  
 Broad.Factor 0.2863 Hz  
 RGain 30  
 Printed 2010/May/02 14:48:40  
 Operator

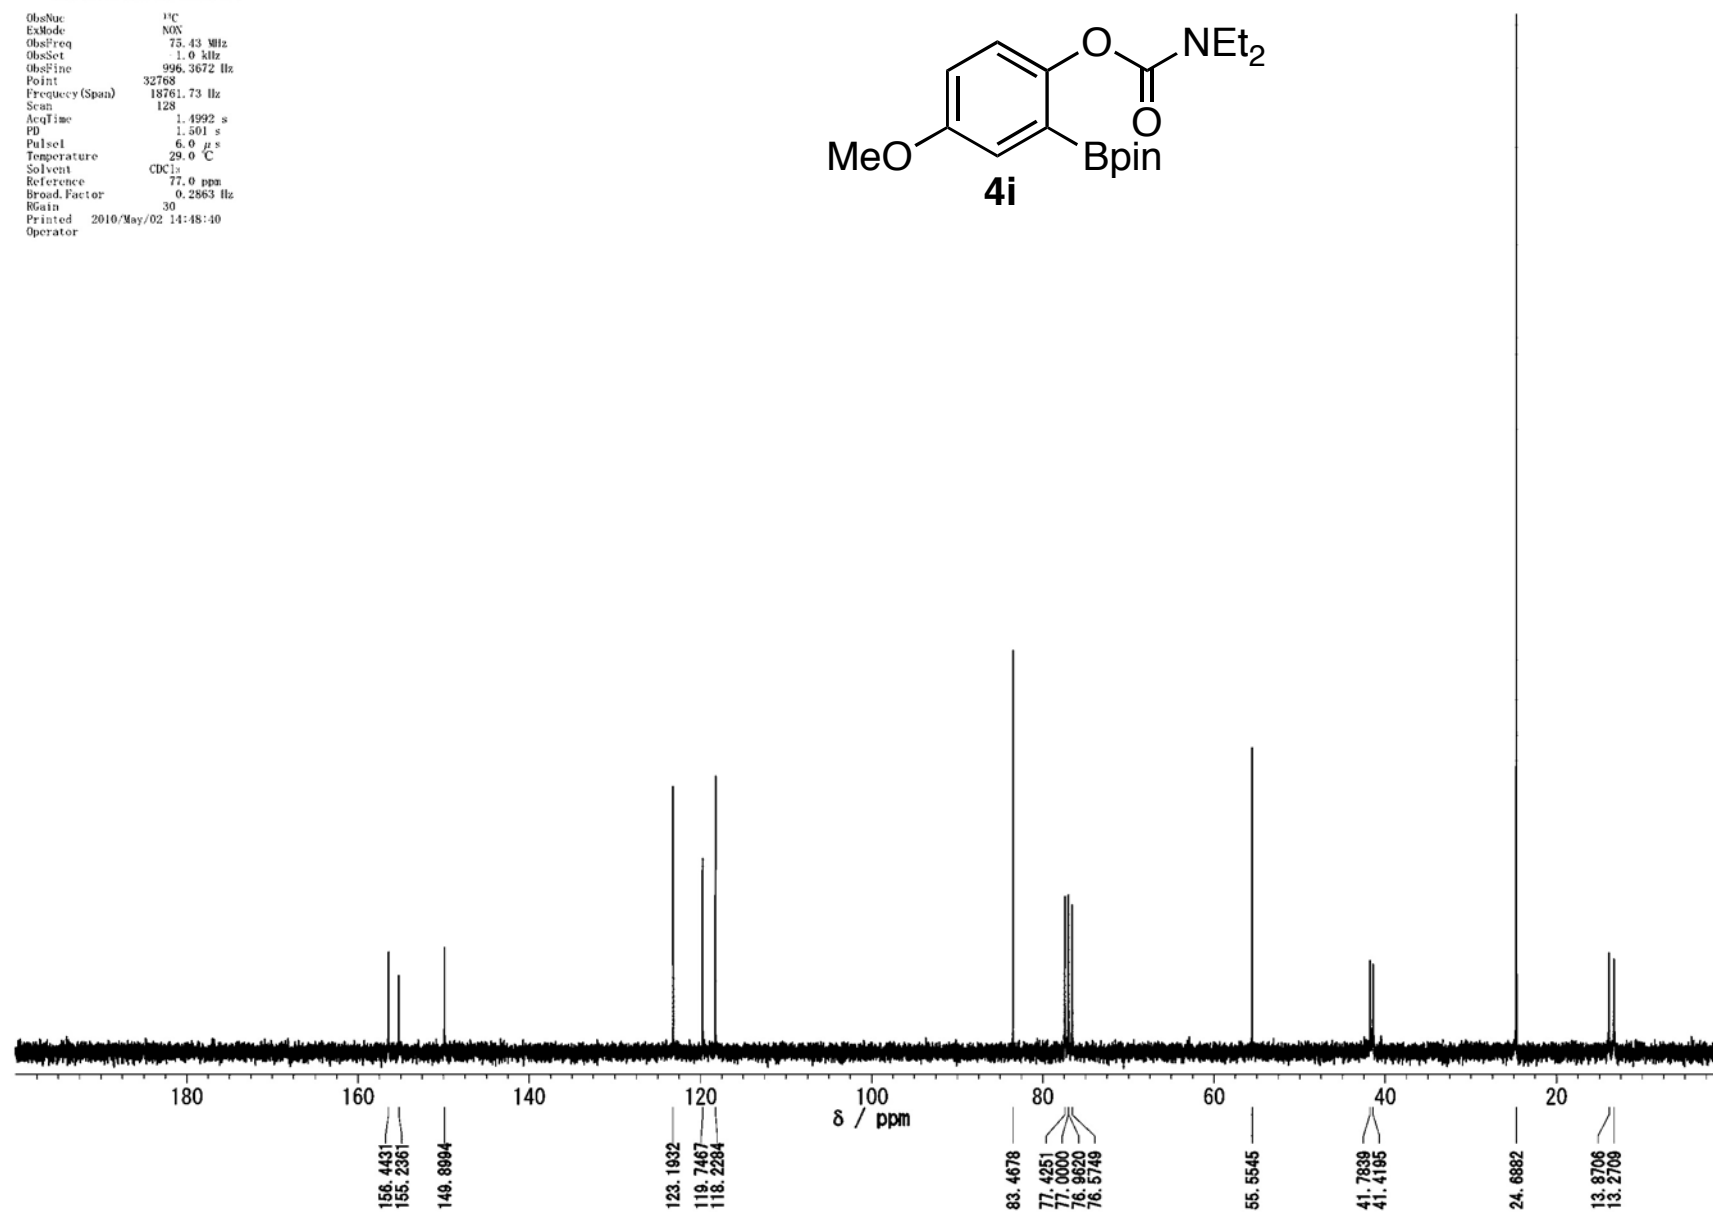

Original File:  
 Date Oct 10 09  
 Comment  
 STANDARD IN OBSERVE

ObsNuc <sup>1</sup>H  
 ExMode NON  
 ObsFreq 299.96 MHz  
 ObsSet 1.0 kHz  
 ObsFine 995.0047 Hz  
 Point 16384  
 Frequency (Span) 4500.45 Hz  
 Scan 16  
 AcqTime 3.4983 s  
 PD 1.502 s  
 Pulse 6.0  $\mu$ s  
 Temperature 29.0  $^{\circ}$ C  
 Solvent CDCl<sub>3</sub>  
 Reference 0.0 ppm  
 Broad Factor 0.1373 Hz  
 RGain 25  
 Printed 2010/May/02 14:52:06  
 Operator

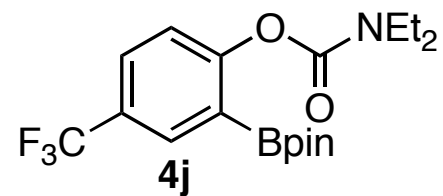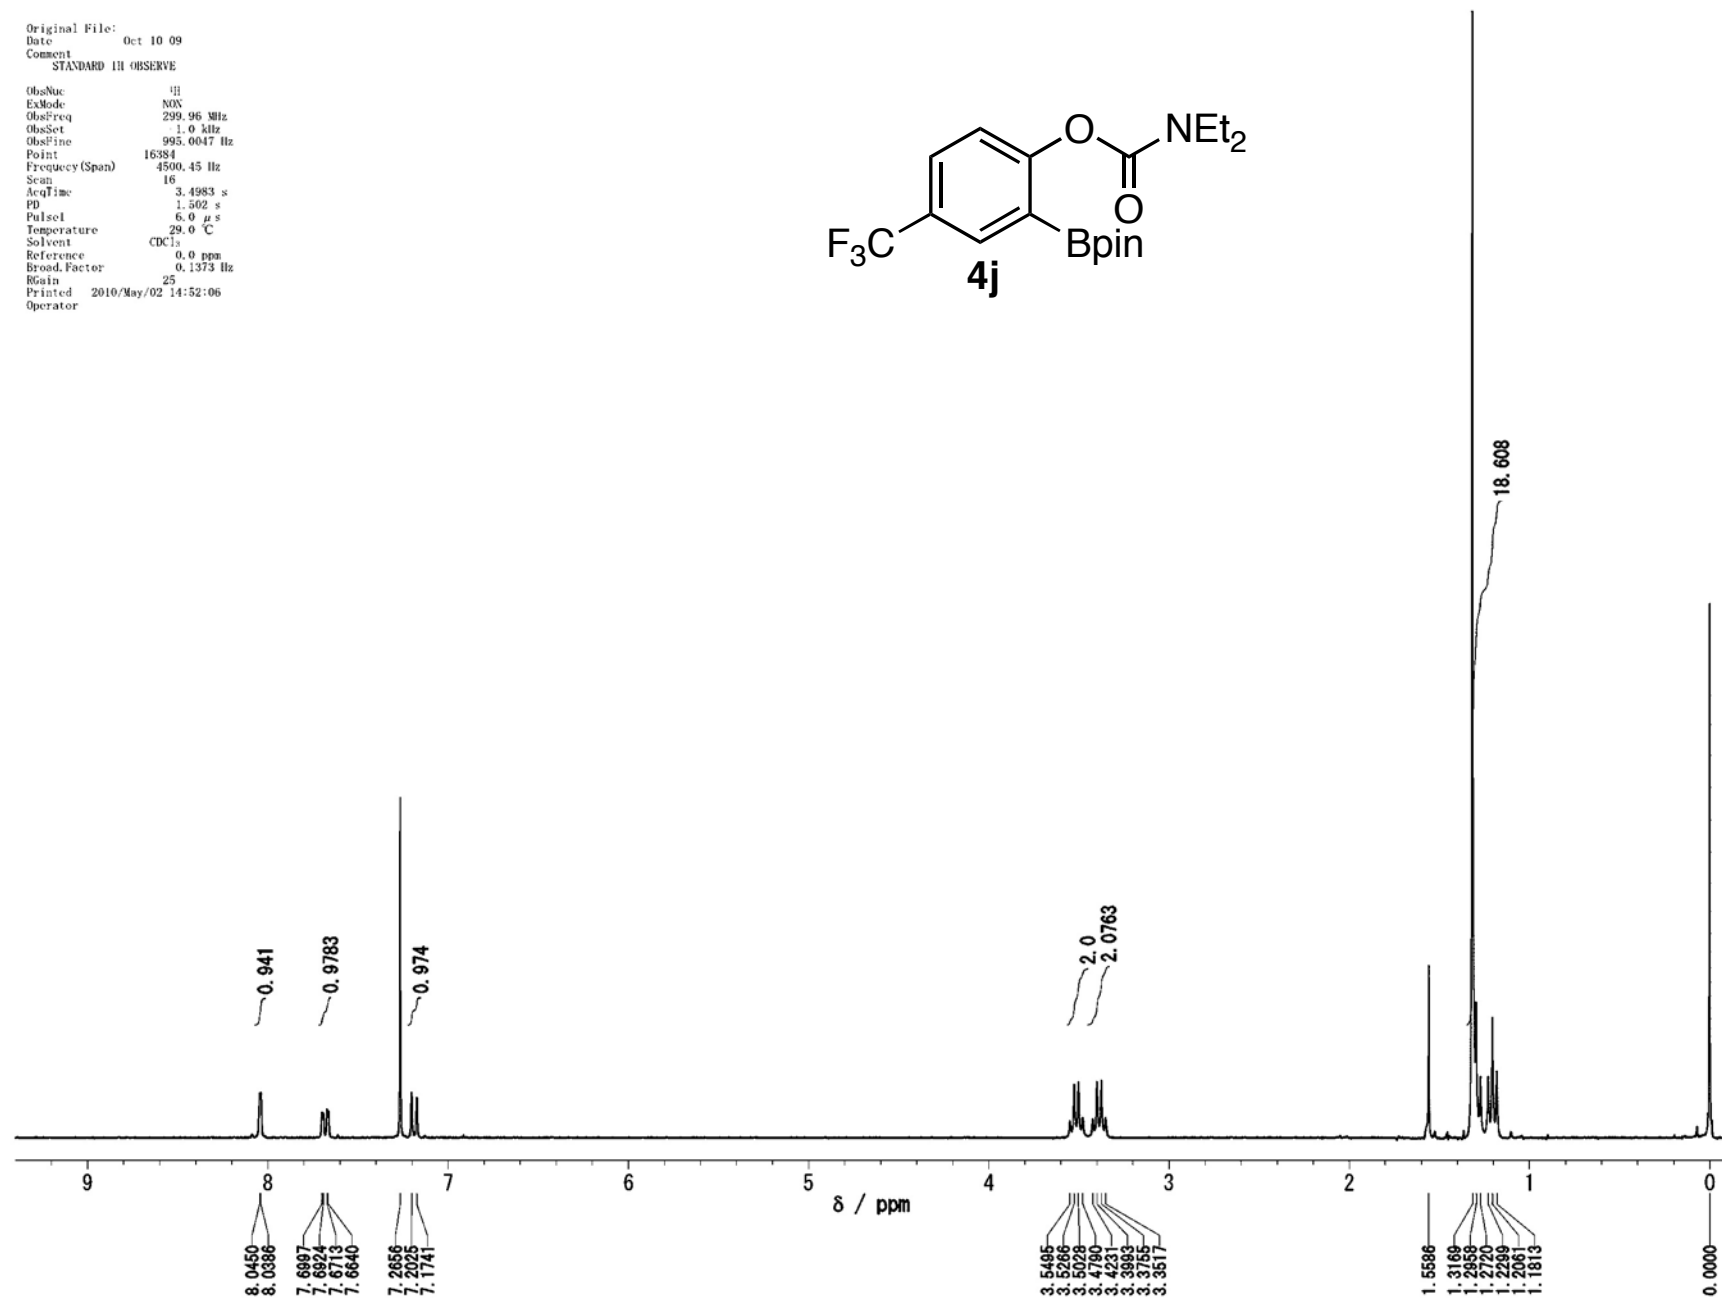





Original File:  
 Date Sep 15 09  
 Comment  
 STANDARD IN OBSERVE

ObsNuc <sup>1</sup>H  
 ExMode NON  
 ObsFreq 299.96 MHz  
 ObsSet 1.0 kHz  
 ObsPine 995.0047 Hz  
 Point 16384  
 Frequency (Span) 4500.45 Hz  
 Scan 16  
 AcqTime 3.4983 s  
 PD 1.502 s  
 Pulse 6.0  $\mu$ s  
 Temperature 29.0  $^{\circ}$ C  
 Solvent CDCl<sub>3</sub>  
 Reference 0.0 ppm  
 Broad Factor 0.1373 Hz  
 RGain 30  
 Printed 2010/May/02 14:59:24  
 Operator

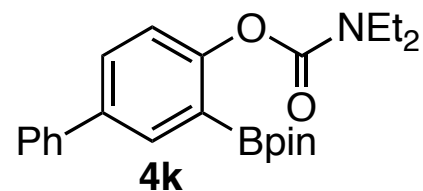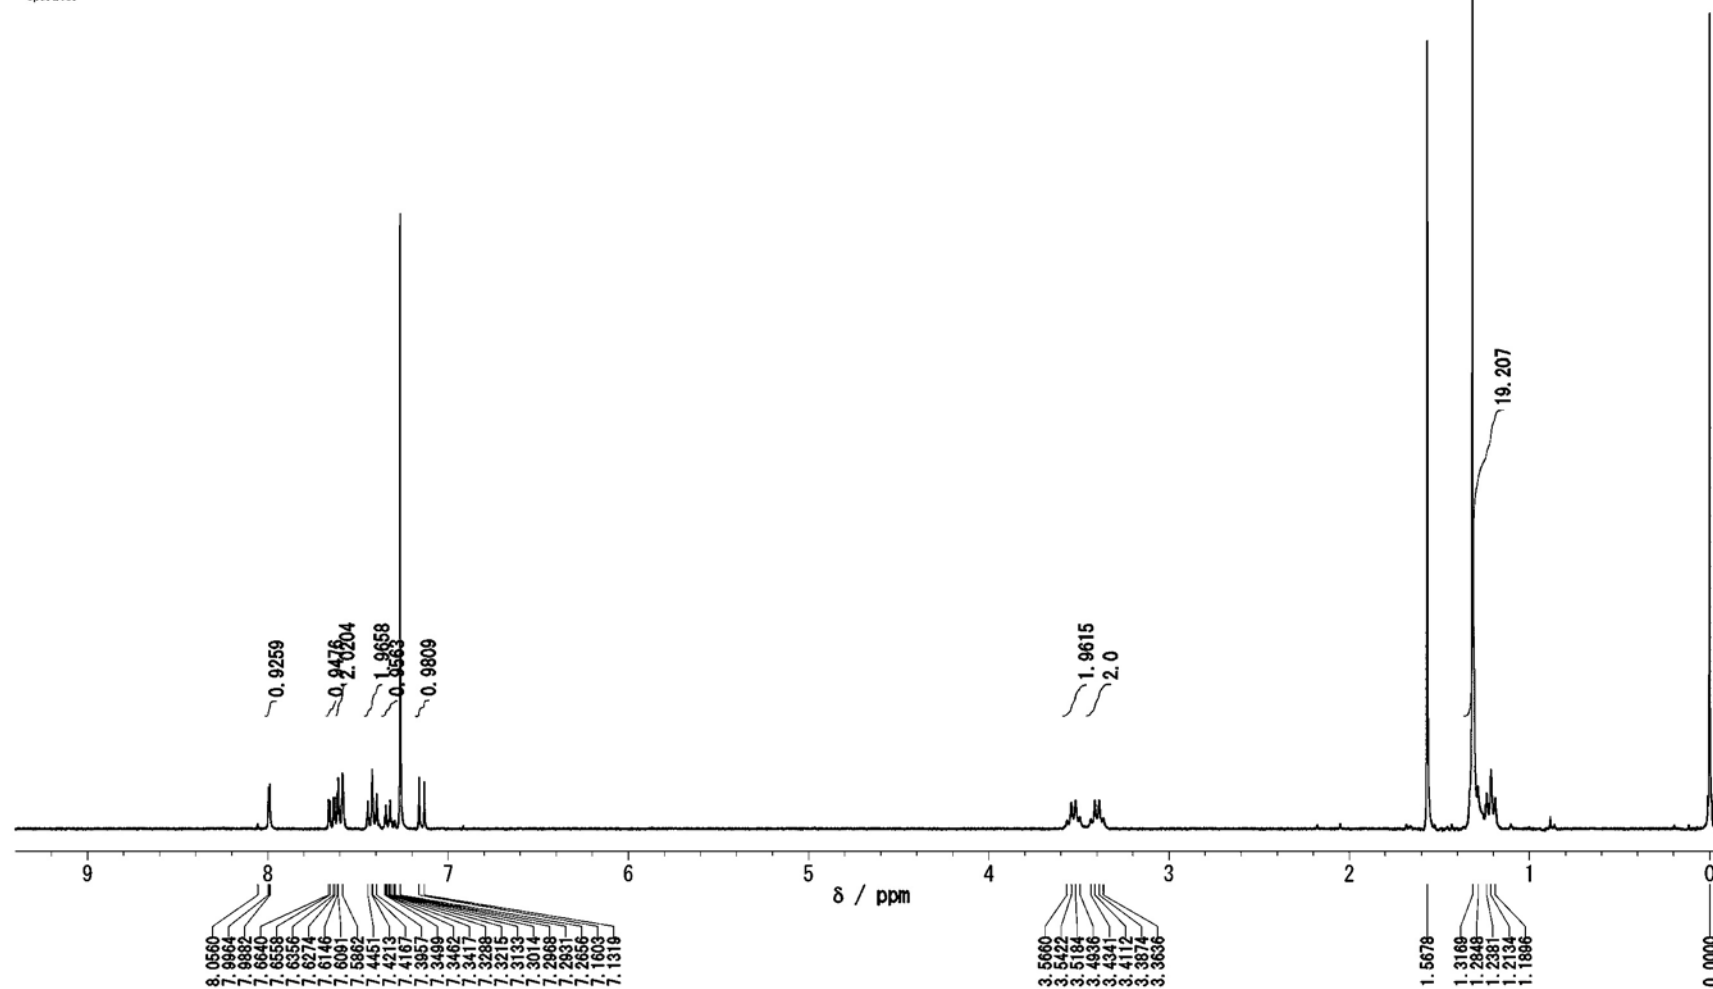

Original File:  
 Date Feb 18 10  
 Comment  
 C13 Standard Observe  
 Stick=none Tune=6.4 Match=0.4

ObsNuc  $^{13}\text{C}$   
 ExMode NON  
 ObsFreq 75.43 MHz  
 ObsSet 1.0 kHz  
 ObsFine 996.3672 Hz  
 Point 32768  
 Frequency (Span) 18761.73 Hz  
 Scan 256  
 AcqTime 1.4992 s  
 PD 1.501 s  
 Pulse 6.0  $\mu\text{s}$   
 Temperature 29.0  $^{\circ}\text{C}$   
 Solvent  $\text{CDCl}_3$   
 Reference 77.0 ppm  
 Broad.Factor 0.2863 Hz  
 RGain 30  
 Printed 2010/May/02 15:03:40  
 Operator

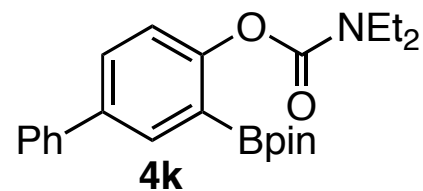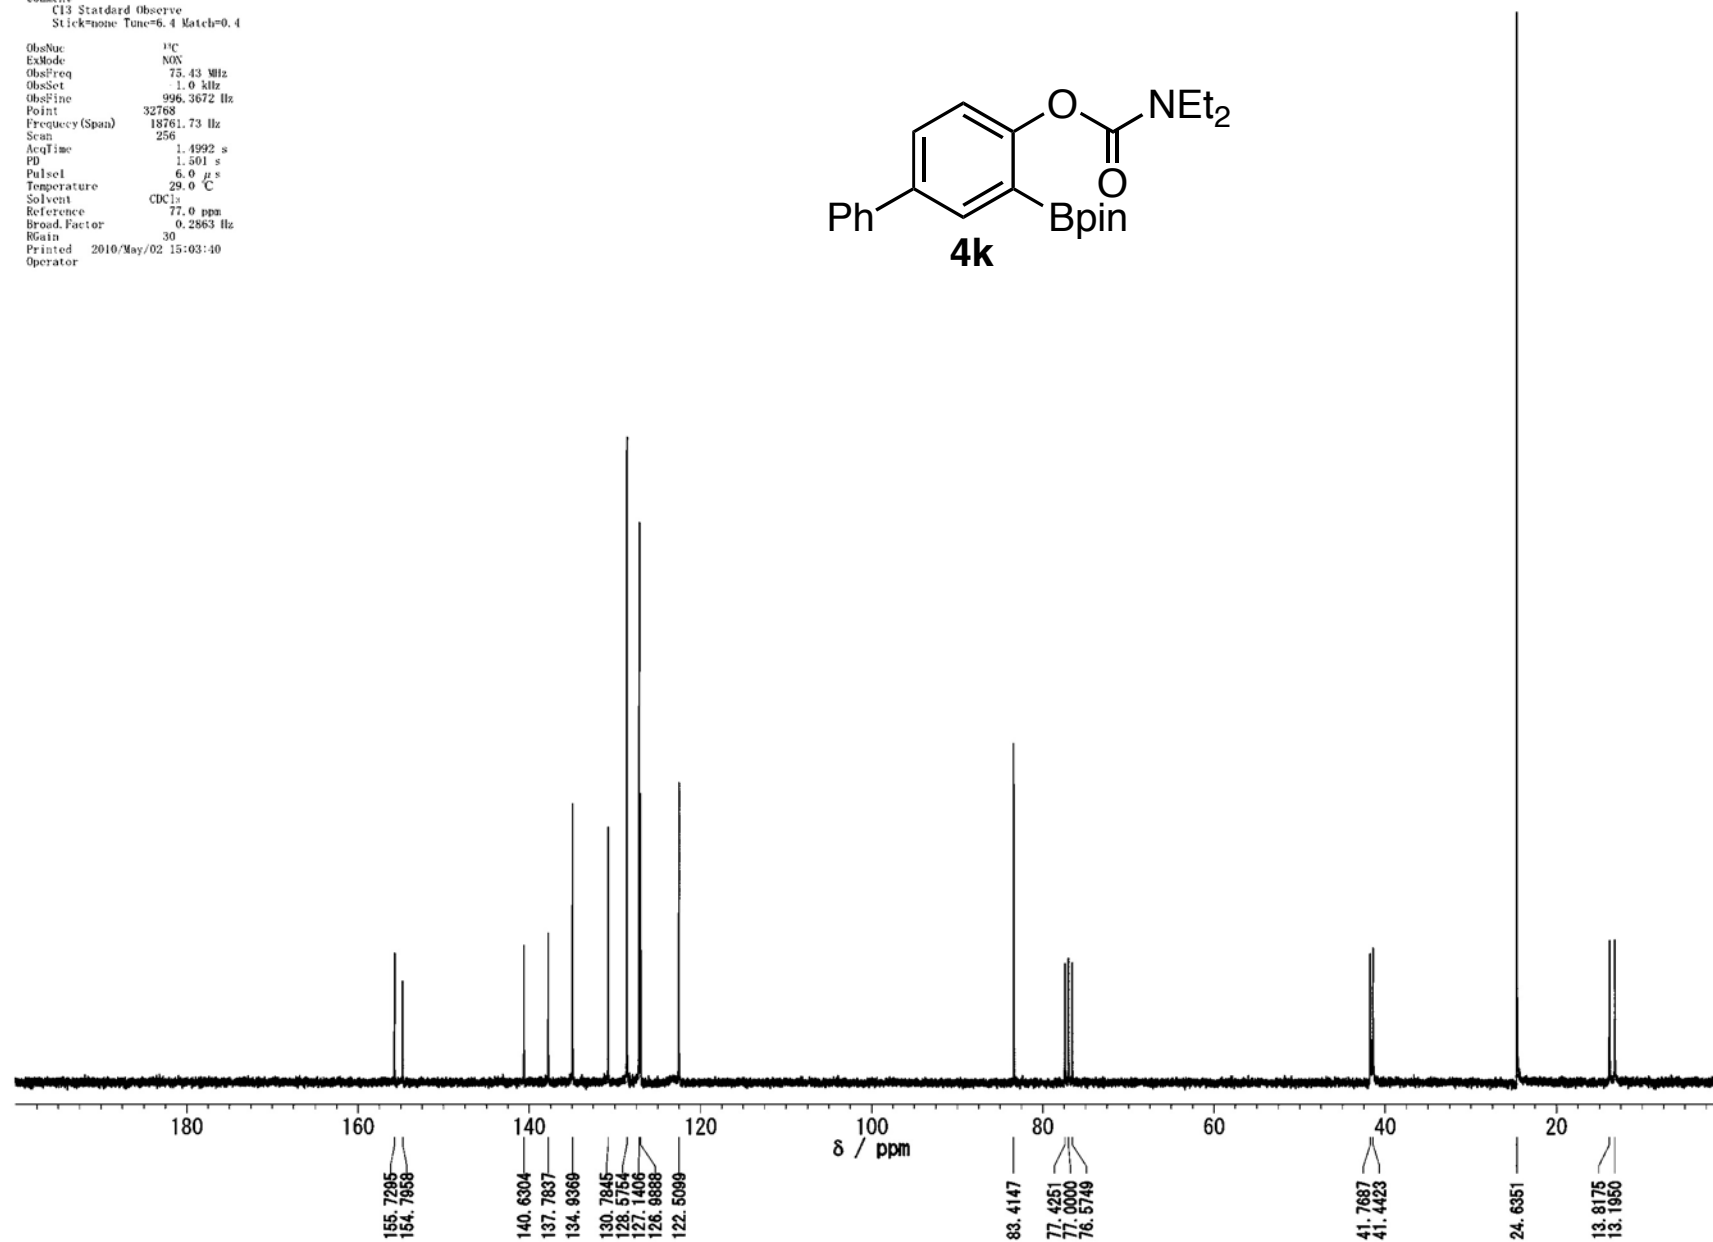

Original File:  
 Date Apr 13 10  
 Comment  
 STANDARD IN OBSERVE

ObsNuc <sup>1</sup>H  
 ExMode NON  
 ObsFreq 299.96 MHz  
 ObsSet 1.0 kHz  
 ObsFine 995.0047 Hz  
 Point 16384  
 Frequency (Span) 4500.45 Hz  
 Scan 16  
 AcqTime 3.4983 s  
 PD 1.502 s  
 Pulse 6.0  $\mu$ s  
 Temperature 29.0  $^{\circ}$ C  
 Solvent CDCl<sub>3</sub>  
 Reference 0.0 ppm  
 Broad. Factor 0.1373 Hz  
 RGain 30  
 Printed 2010/May/02 15:08:50  
 Operator

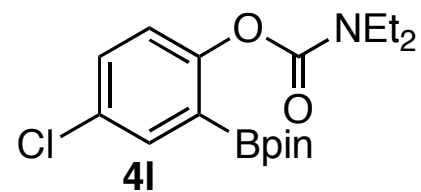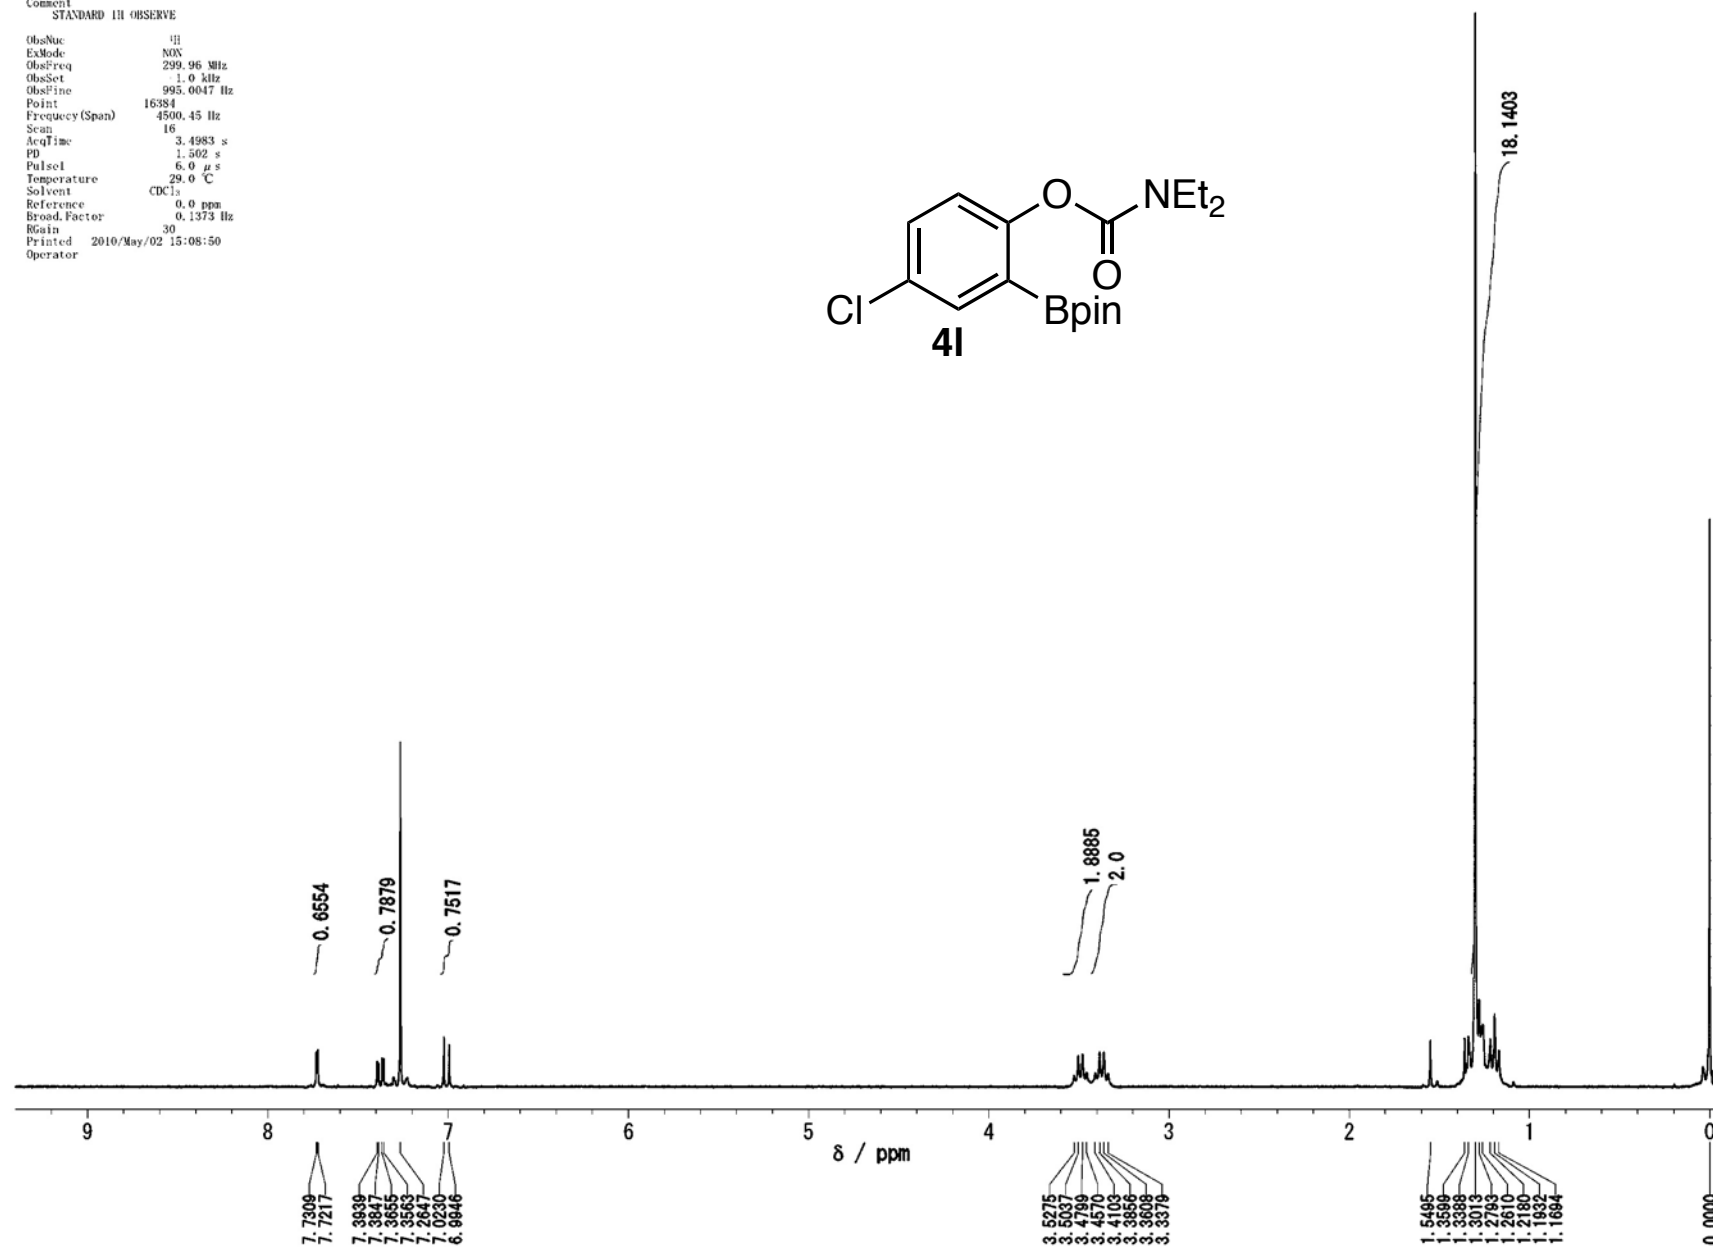

Original File:  
 Date Apr 27 10  
 Comment  
 C13 Standard Observe  
 Stick=none Tune=6.4 Match=0.4  
 ObsNuc <sup>13</sup>C  
 ExMode NON  
 ObsFreq 75.43 MHz  
 ObsSet 1.0 kHz  
 ObsFine 996.3672 Hz  
 Point 32768  
 Frequency (Span) 18761.73 Hz  
 Scan 10400  
 AcqTime 1.4992 s  
 PD 1.501 s  
 Pulse 6.0  $\mu$ s  
 Temperature 29.0  $^{\circ}$ C  
 Solvent CDCl<sub>3</sub>  
 Reference 77.0 ppm  
 Broad Factor 0.2863 Hz  
 RGain 30  
 Printed 2010/May/02 15:11:31  
 Operator

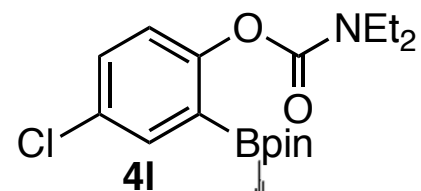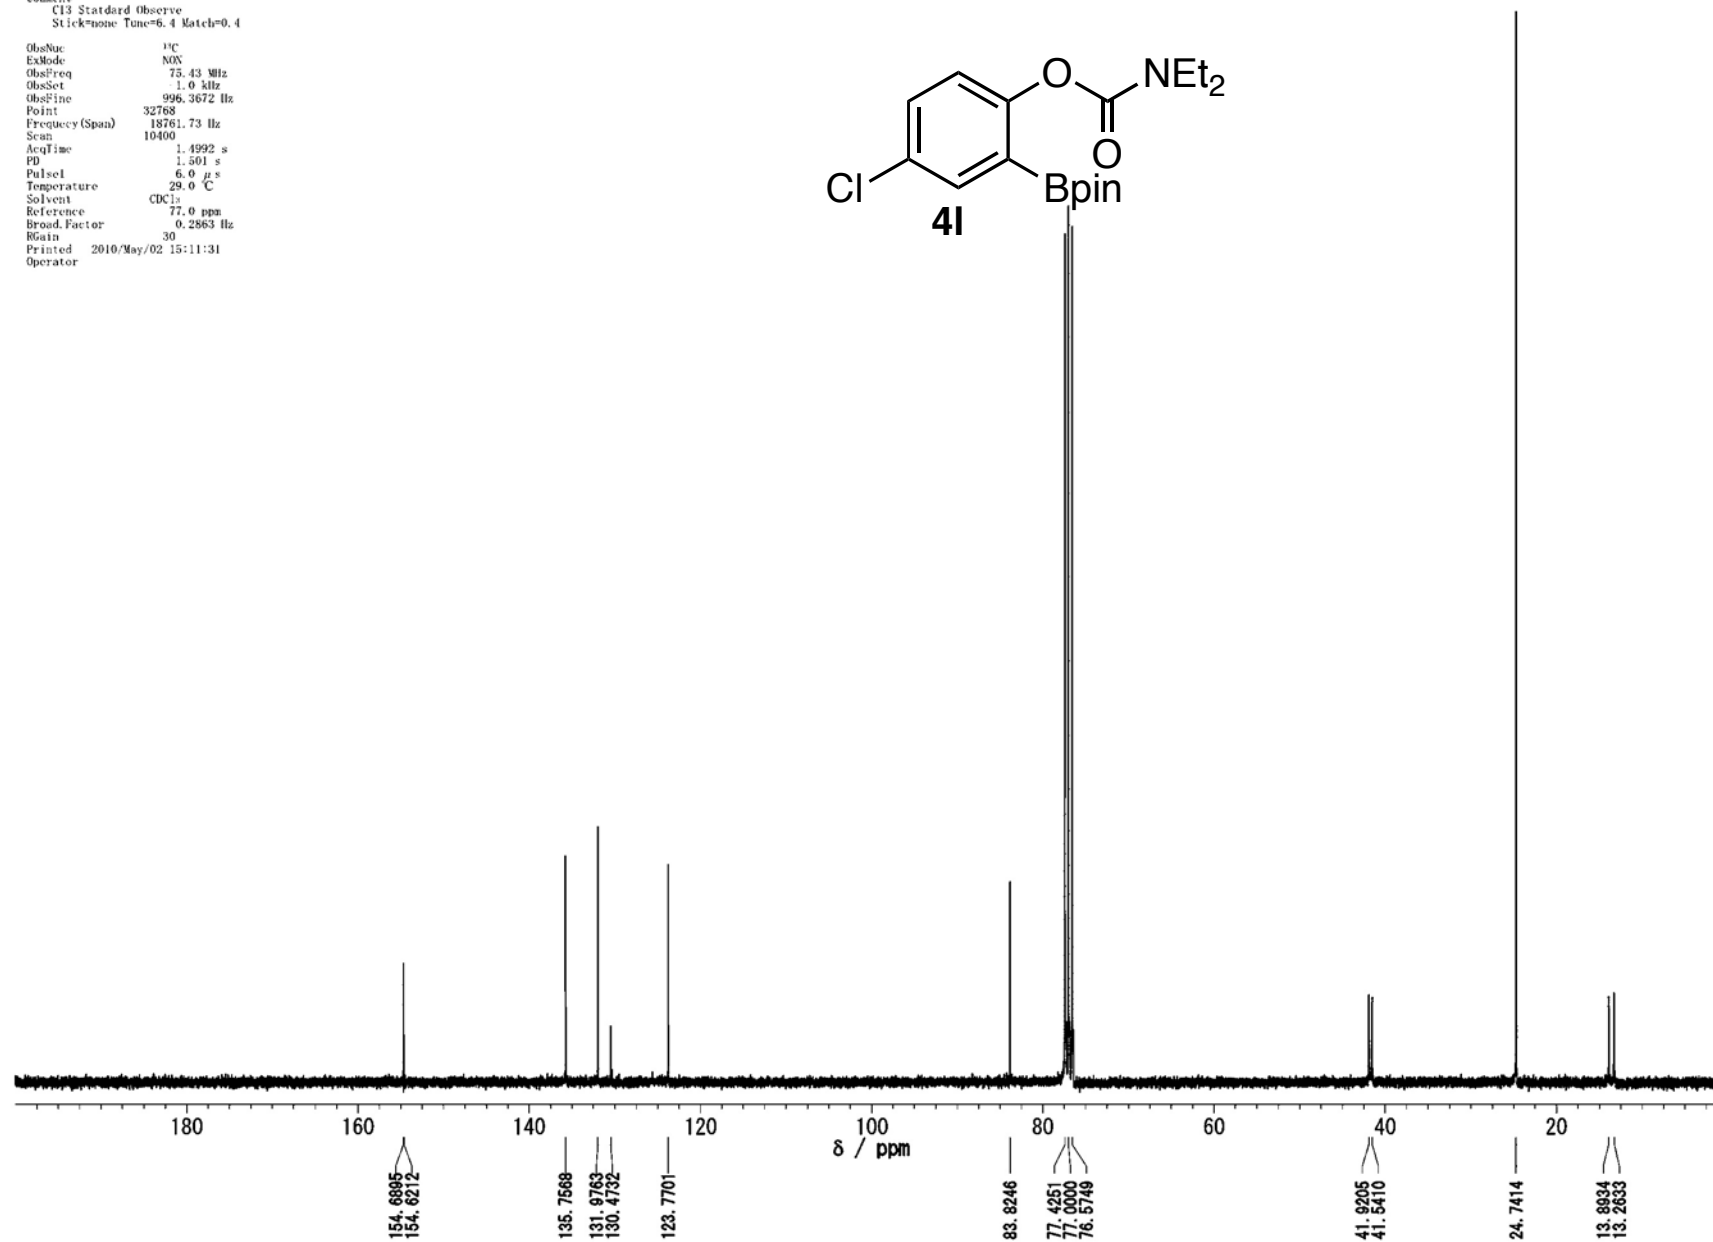

Original File:  
 Date Dec 7 09  
 Comment  
 STANDARD IH OBSERVE

ObsNuc <sup>1</sup>H  
 ExMode NOX  
 ObsFreq 299.96 MHz  
 ObsSet 1.0 kHz  
 ObsFine 995.0047 Hz  
 Point 16384  
 Frequency (Span) 4500.45 Hz  
 Scan 16  
 AcqTime 3.4983 s  
 PD 1.502 s  
 Pulse 6.0  $\mu$ s  
 Temperature 29.0  $^{\circ}$ C  
 Solvent CDCl<sub>3</sub>  
 Reference 0.0 ppm  
 Broad.Factor 0.1373 Hz  
 RGain 12  
 Printed 2010/May/02 15:16:10  
 Operator

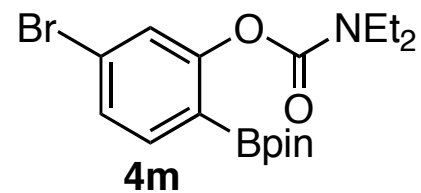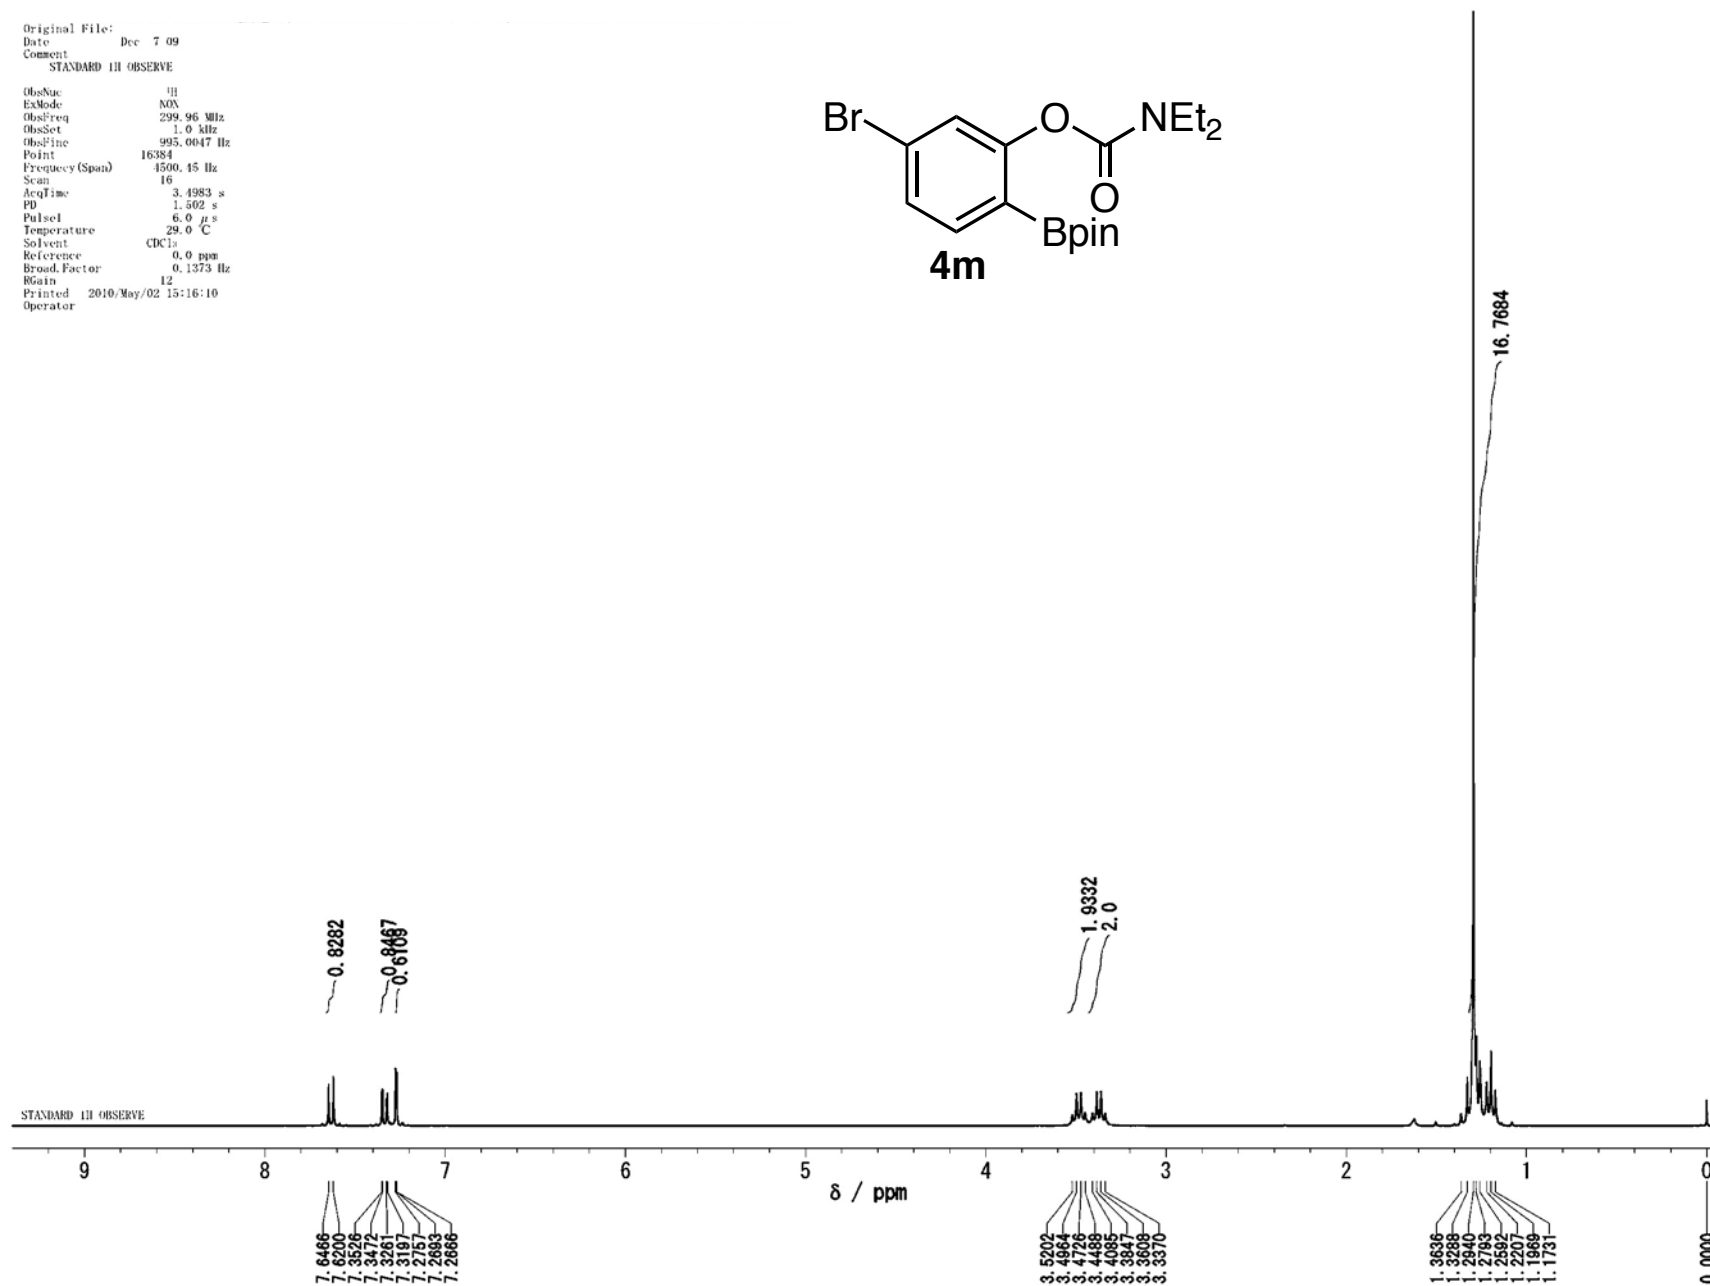

Original File:  
 Date Feb 22 10  
 Comment  
 C13 Standard Observe  
 Stick=none Tune=6.4 Match=0.4  
 ObsNuc <sup>13</sup>C  
 ExMode NON  
 ObsFreq 75.43 MHz  
 ObsSet 1.0 kHz  
 ObsFine 996.3672 Hz  
 Point 32768  
 Frequency (Span) 18761.73 Hz  
 Scan 256  
 AcqTime 1.4992 s  
 PD 1.501 s  
 Pulse 6.0  $\mu$ s  
 Temperature 29.0  $^{\circ}$ C  
 Solvent CDCl<sub>3</sub>  
 Reference 77.0 ppm  
 Broad.Factor 0.2863 Hz  
 RGain 30  
 Printed 2010/May/02 15:18:26  
 Operator

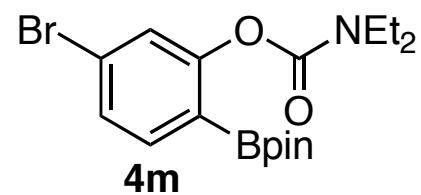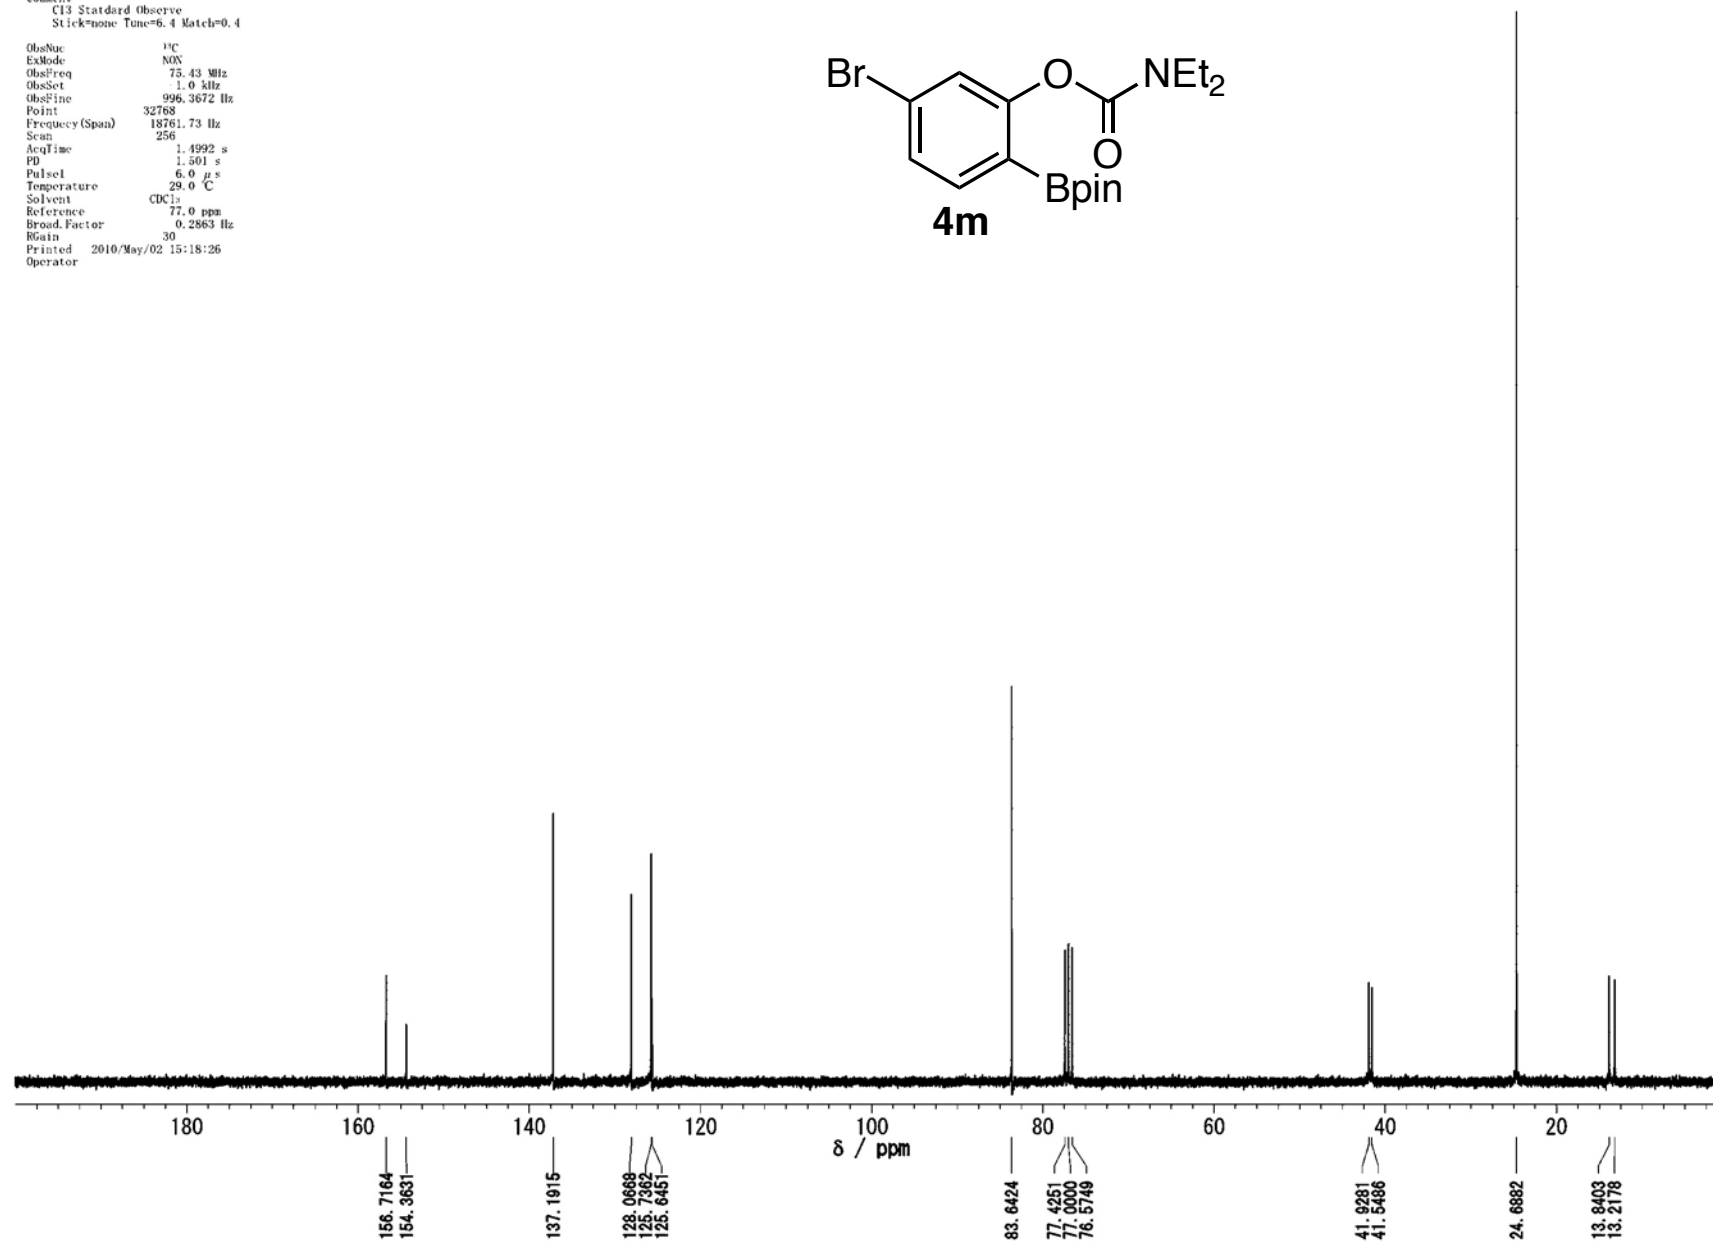

Original File:  
Date Jun 23 10  
Comment  
STANDARD IN OBSERVE

ObsNuc <sup>1</sup>H  
ExMode NON  
ObsFreq 299.96 MHz  
ObsSet 1.0 kHz  
ObsFine 995.0047 Hz  
Point 16384  
Frequency (Span) 4500.45 Hz  
Scan 16  
AcqTime 3.4983 s  
PD 1.502 s  
Pulse 6.0  $\mu$ s  
Temperature 29.0  $^{\circ}$ C  
Solvent CDCl<sub>3</sub>  
Reference 0.0 ppm  
Broad Factor 0.1373 Hz  
RGain 2  
Printed 2010/Jun/24 11:58:30  
Operator

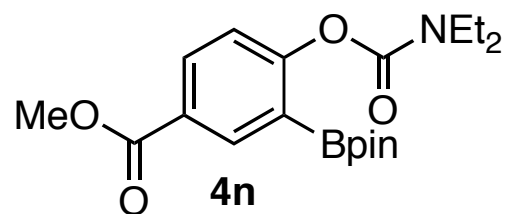

+

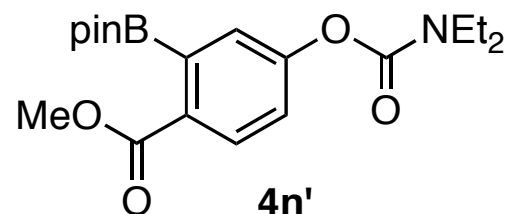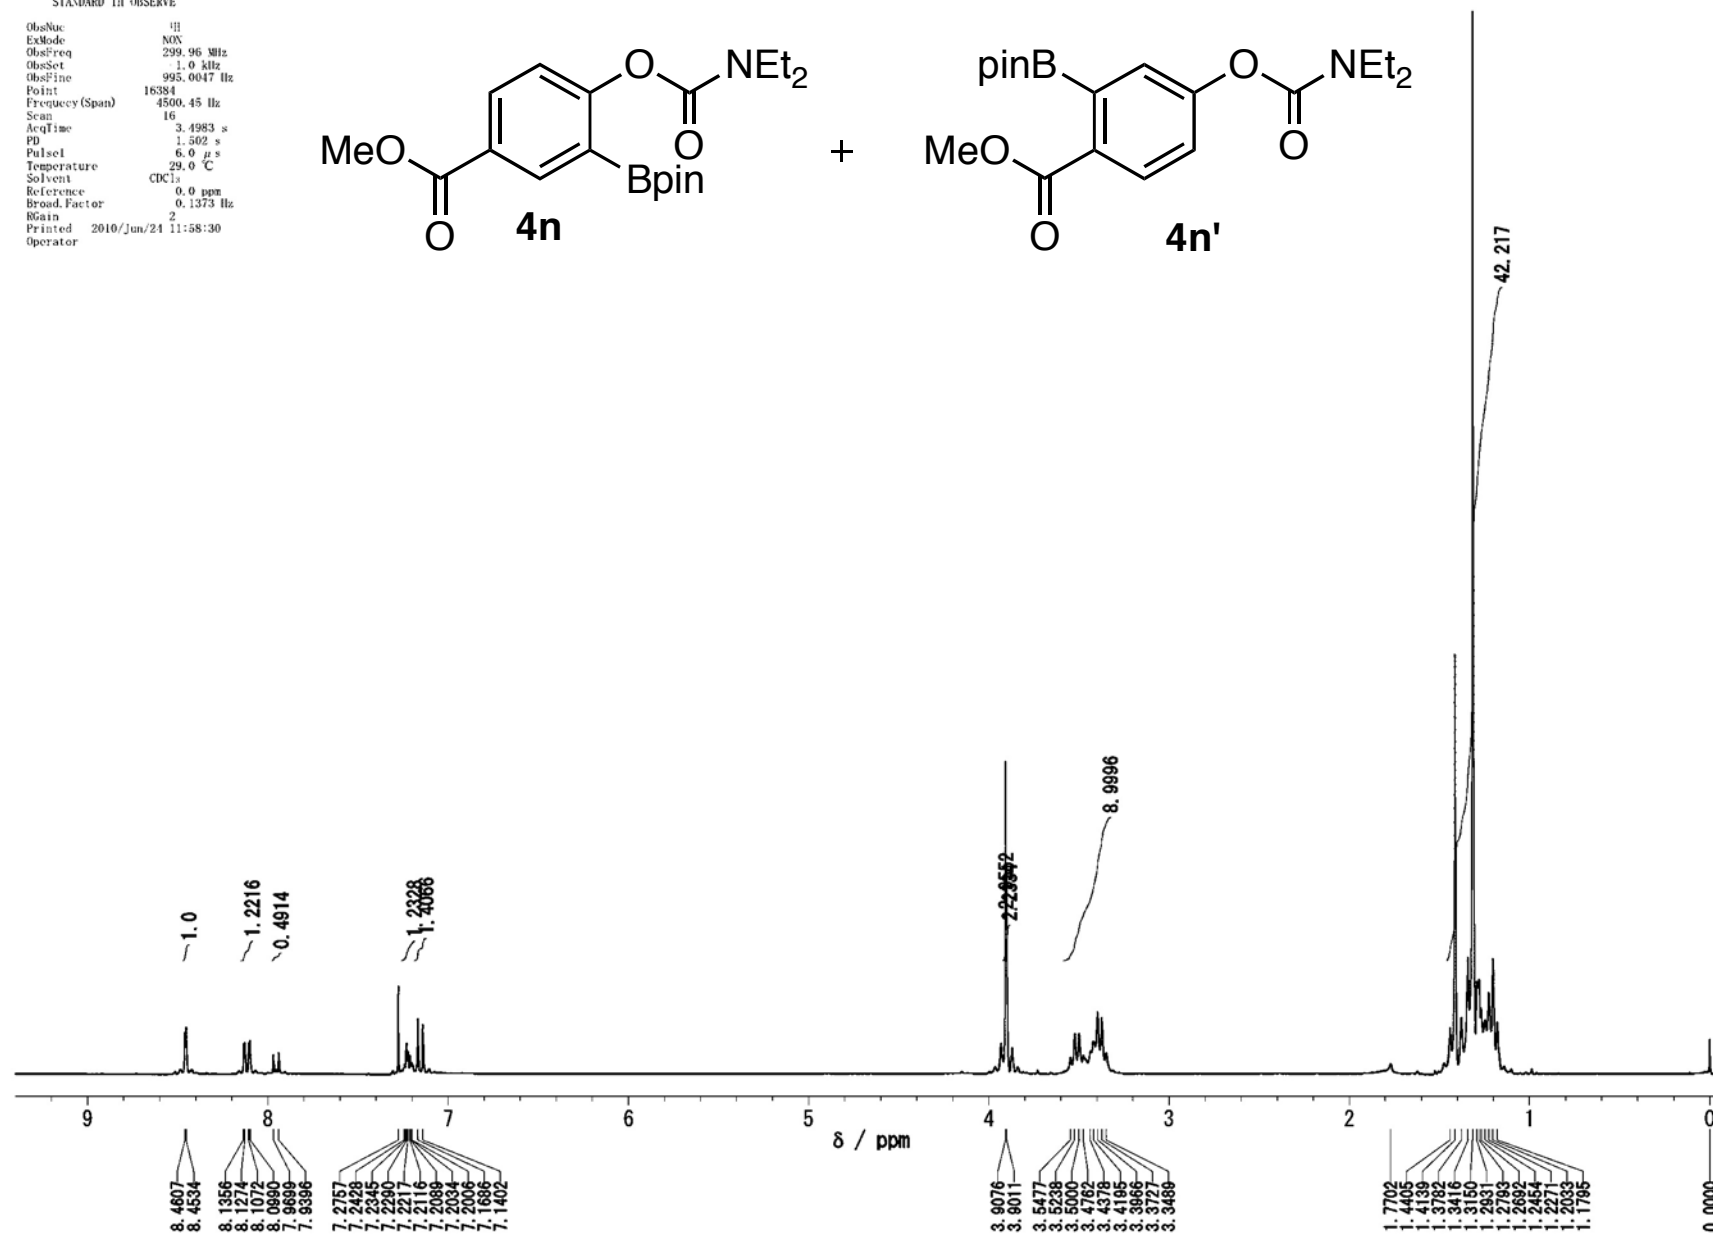



Original File:  
Date Jun 23 10  
Comment  
C13 Standard Observe  
Stick:none Tune=6.4 Match=0.4

ObsNuc <sup>13</sup>C  
ExMode NON  
ObsFreq 75.43 MHz  
ObsSet 1.0 kHz  
ObsFine 996.3672 Hz  
Point 32768  
Frequency (Span) 18761.73 Hz  
Scan 128  
AcqTime 1.4992 s  
PD 1.501 s  
Pulse 6.0  $\mu$ s  
Temperature 29.0  $^{\circ}$ C  
Solvent CDCl<sub>3</sub>  
Reference 77.0 ppm  
Broad.Factor 0.2863 Hz  
RGain 30  
Printed 2010/Jun/24 11:53:38  
Operator

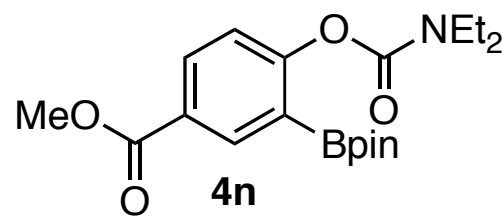

+

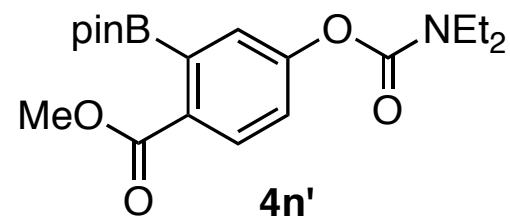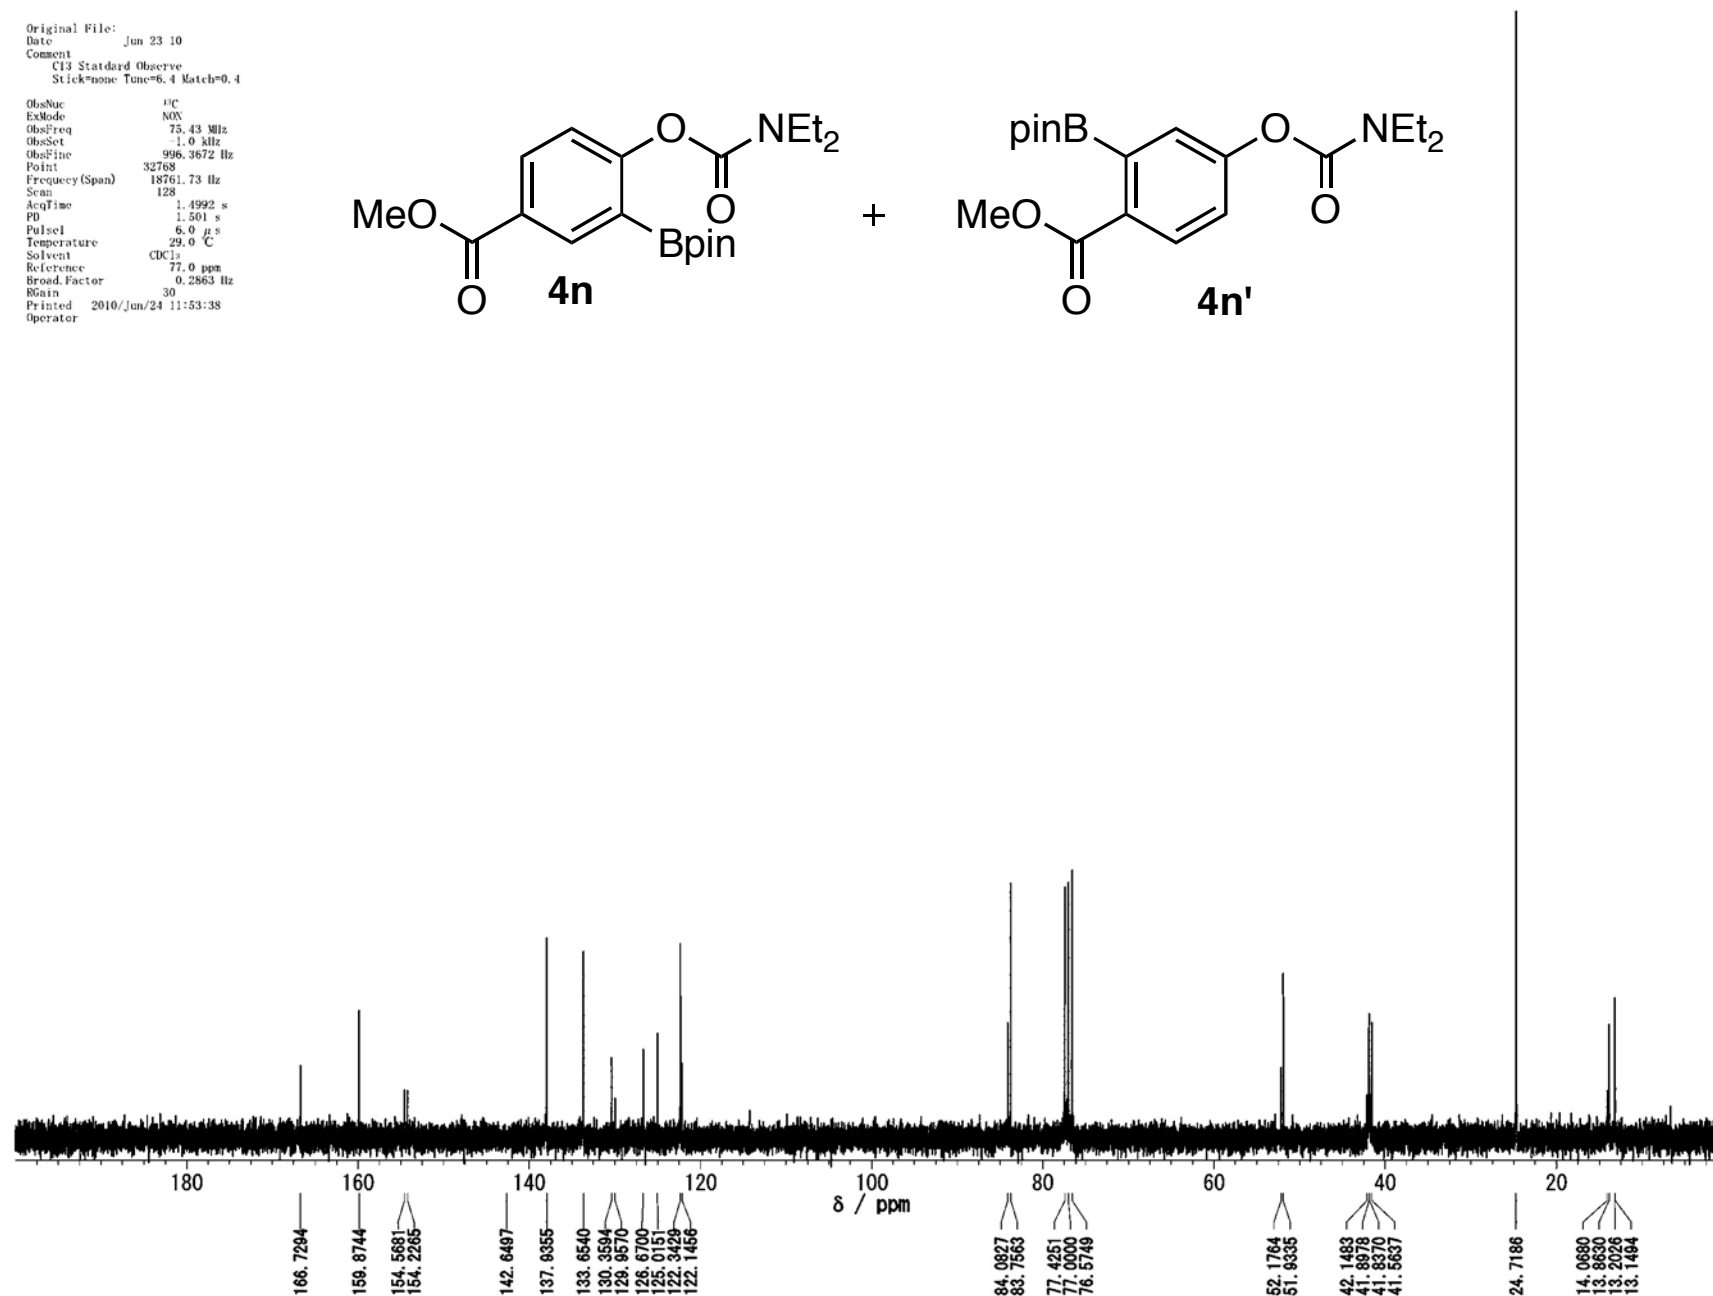

Original File:  
 Date Feb 25 10  
 Comment  
 STANDARD IN OBSERVE

ObsNuc <sup>1</sup>H  
 ExMode NON  
 ObsFreq 299.96 MHz  
 ObsSet 1.0 kHz  
 ObsPine 995.0047 Hz  
 Point 16384  
 Frequency (Span) 4500.45 Hz  
 Scan 16  
 AcqTime 3.4983 s  
 PD 1.502 s  
 Pulsel 6.0  $\mu$ s  
 Temperature 29.0  $^{\circ}$ C  
 Solvent CDCl<sub>3</sub>  
 Reference 0.0 ppm  
 Broad Factor 0.1373 Hz  
 RGain 6  
 Printed 2010/May/02 15:25:11  
 Operator

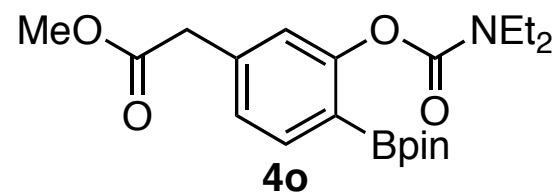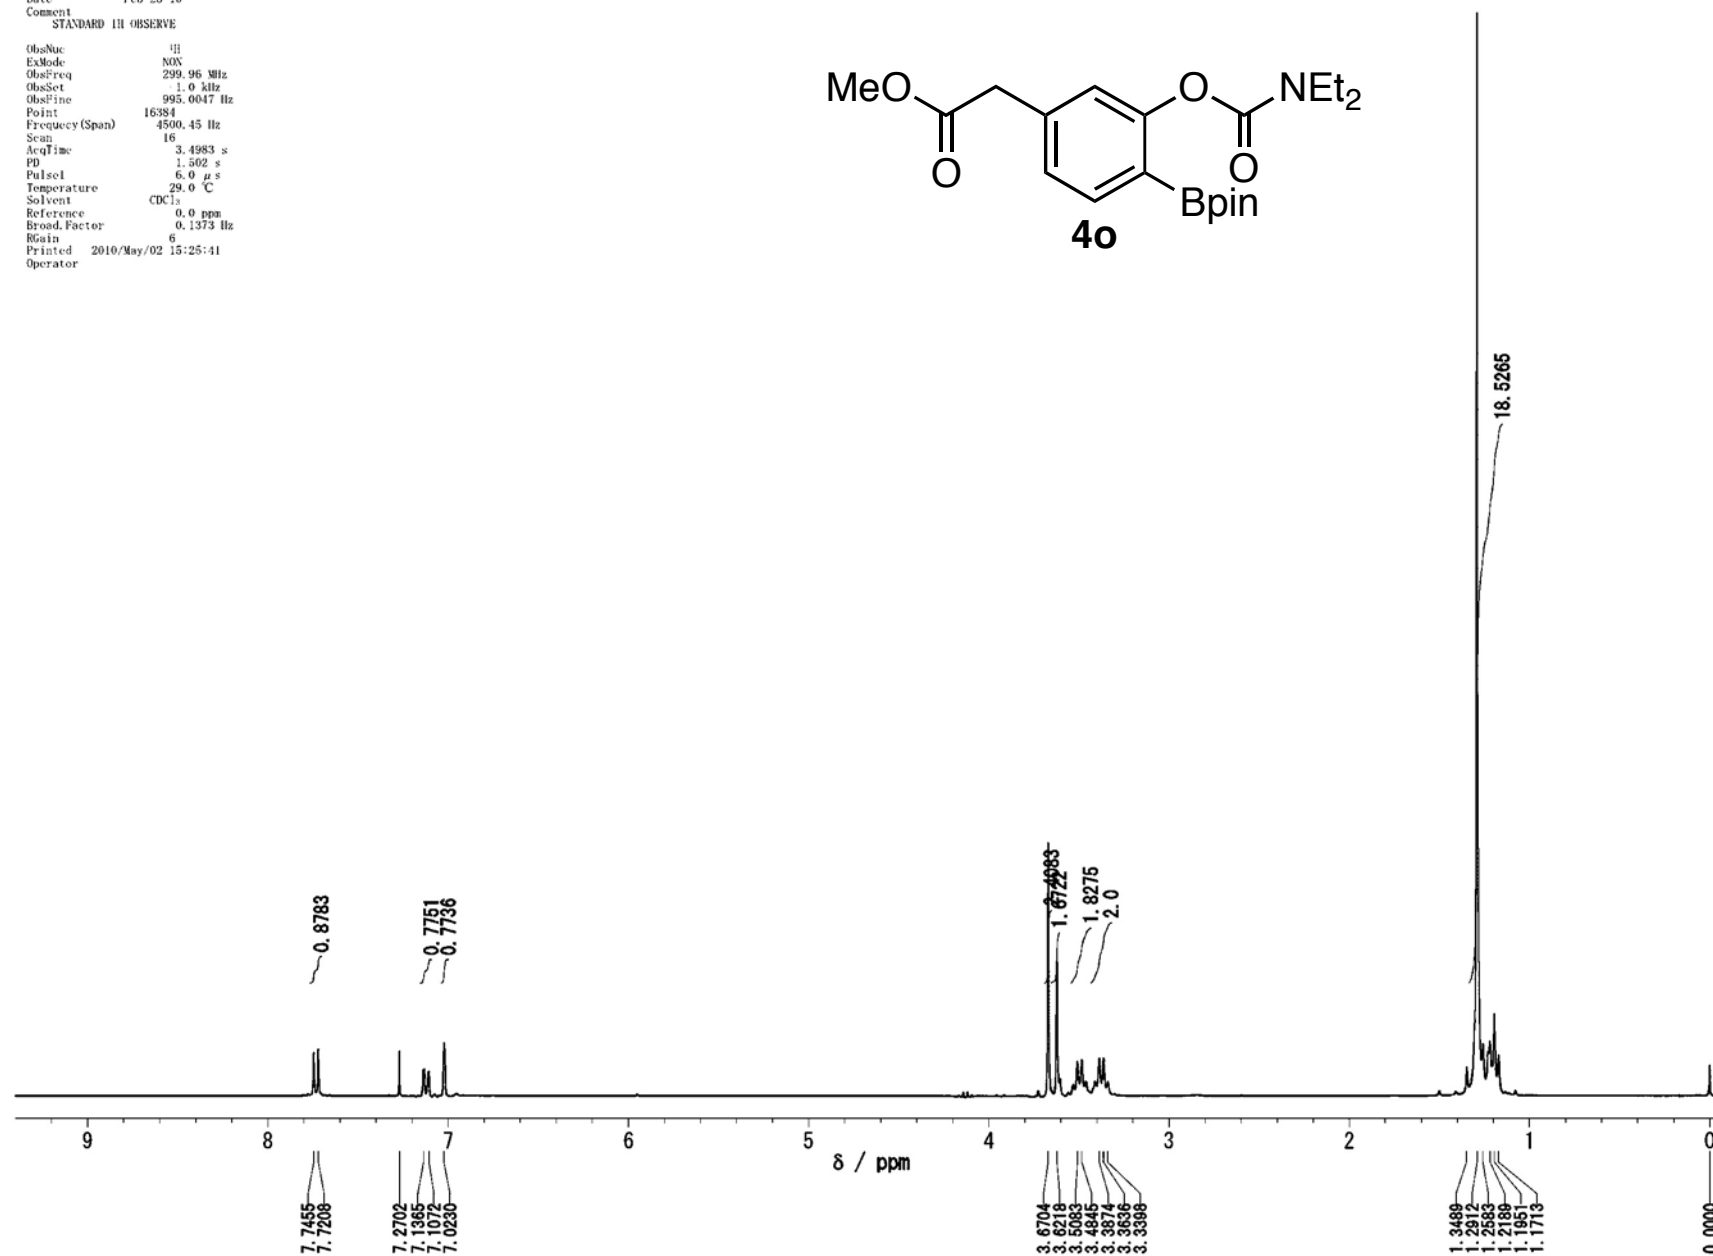

Original File:  
 Date Feb 25 10  
 Comment  
 C13 Standard Observe  
 Stick=none Tune=6.4 Match=0.4  
 ObsNuc <sup>13</sup>C  
 ExMode NON  
 ObsFreq 75.43 MHz  
 ObsSet 1.0 kHz  
 ObsFine 996.3672 Hz  
 Point 32768  
 Frequency (Span) 18761.73 Hz  
 Scan 128  
 AcqTime 1.4992 s  
 PD 1.501 s  
 Pulse 6.0  $\mu$ s  
 Temperature 29.0  $^{\circ}$ C  
 Solvent CDCl<sub>3</sub>  
 Reference 77.0 ppm  
 Broad.Factor 0.2863 Hz  
 RGain 30  
 Printed 2010/May/02 15:27:38  
 Operator

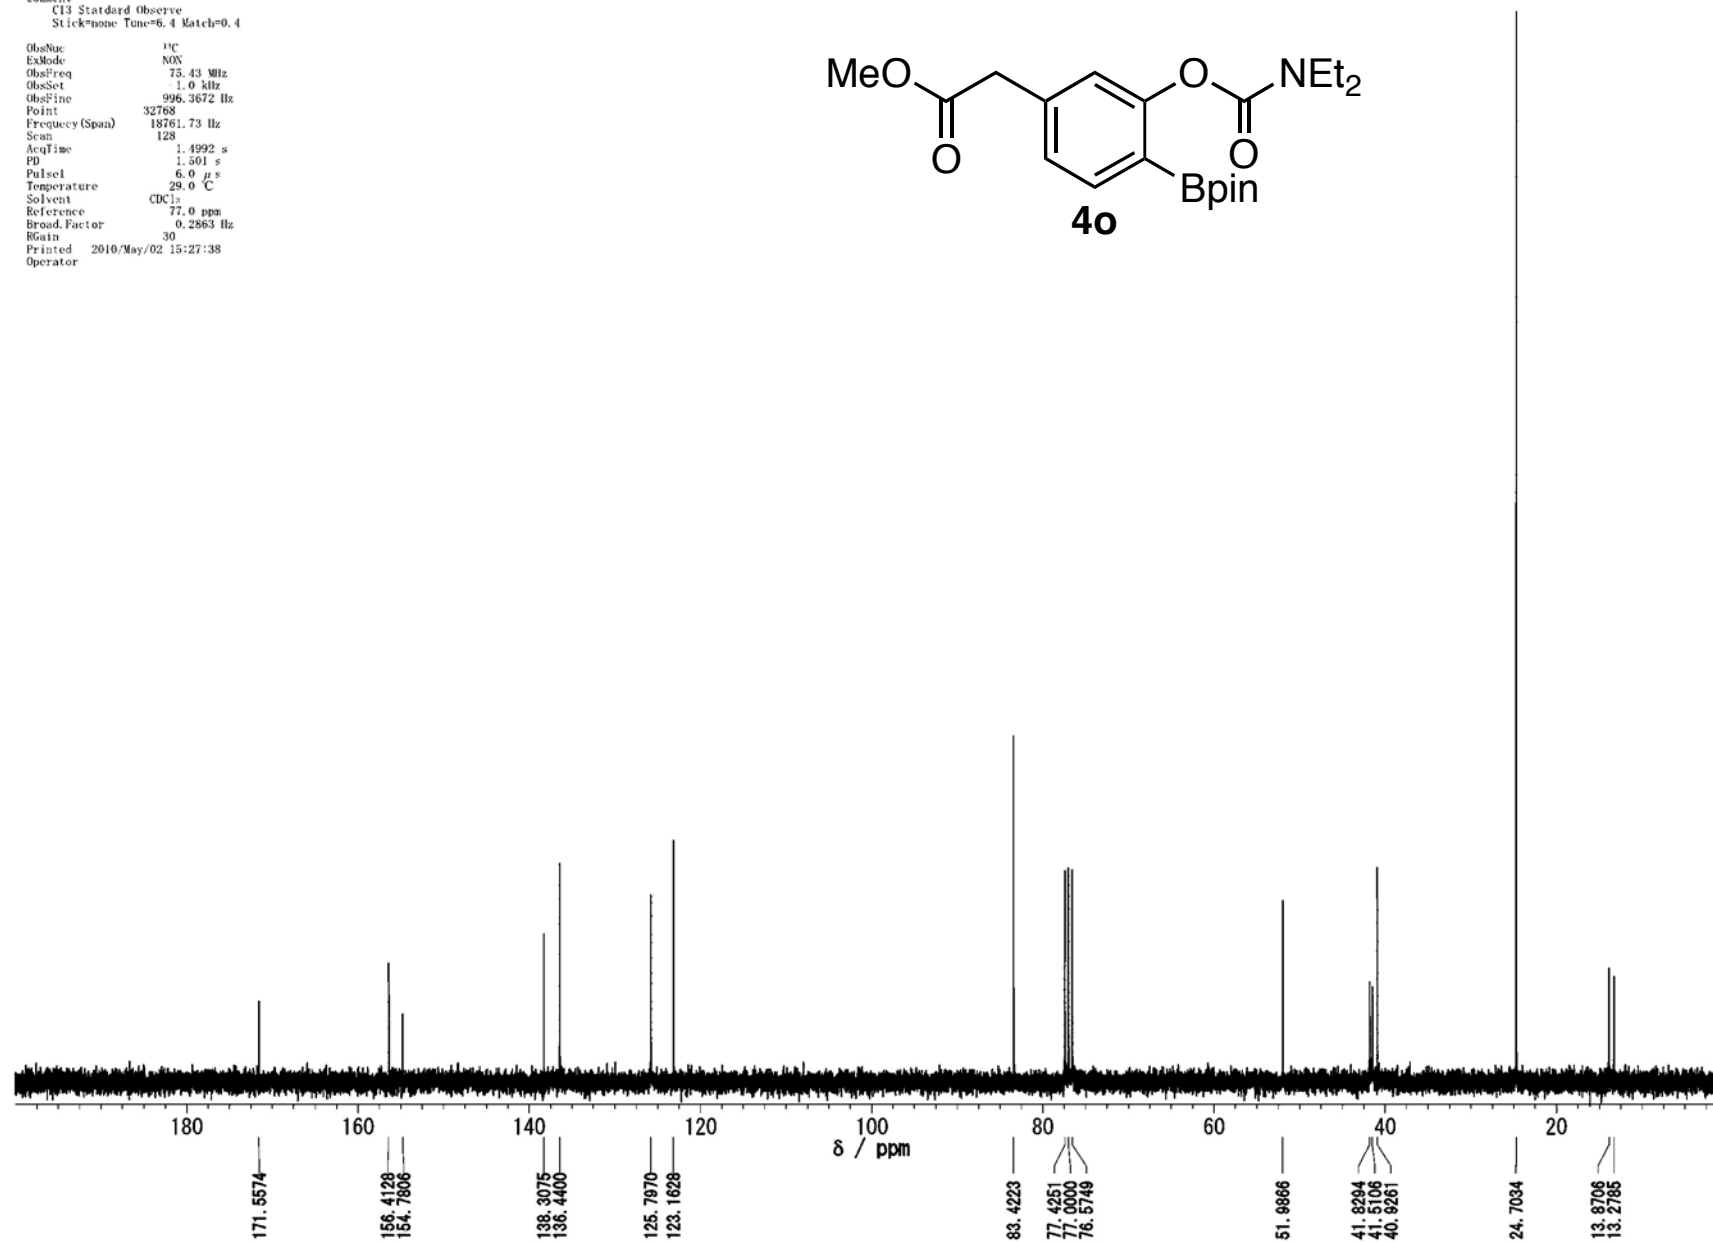

Original File:  
 Date Apr 24 10  
 Comment  
 STANDARD IN OBSERVE

ObsNuc <sup>1</sup>H  
 ExMode NON  
 ObsFreq 299.96 MHz  
 ObsSet 1.0 kHz  
 ObsFine 995.0047 Hz  
 Point 16384  
 Frequency (Span) 4500.45 Hz  
 Scan 16  
 AcqTime 3.4983 s  
 PD 1.502 s  
 Pulse 6.0  $\mu$ s  
 Temperature 29.0  $^{\circ}$ C  
 Solvent CDCl<sub>3</sub>  
 Reference 0.0 ppm  
 Broad Factor 0.1373 Hz  
 RGain 30  
 Printed 2010/May/02 15:31:32  
 Operator

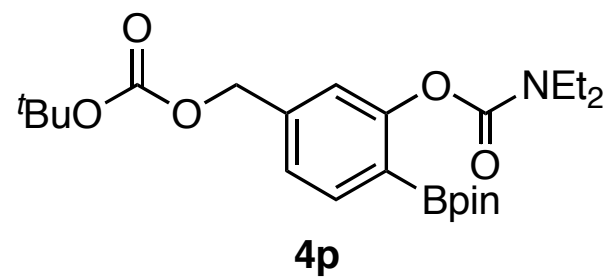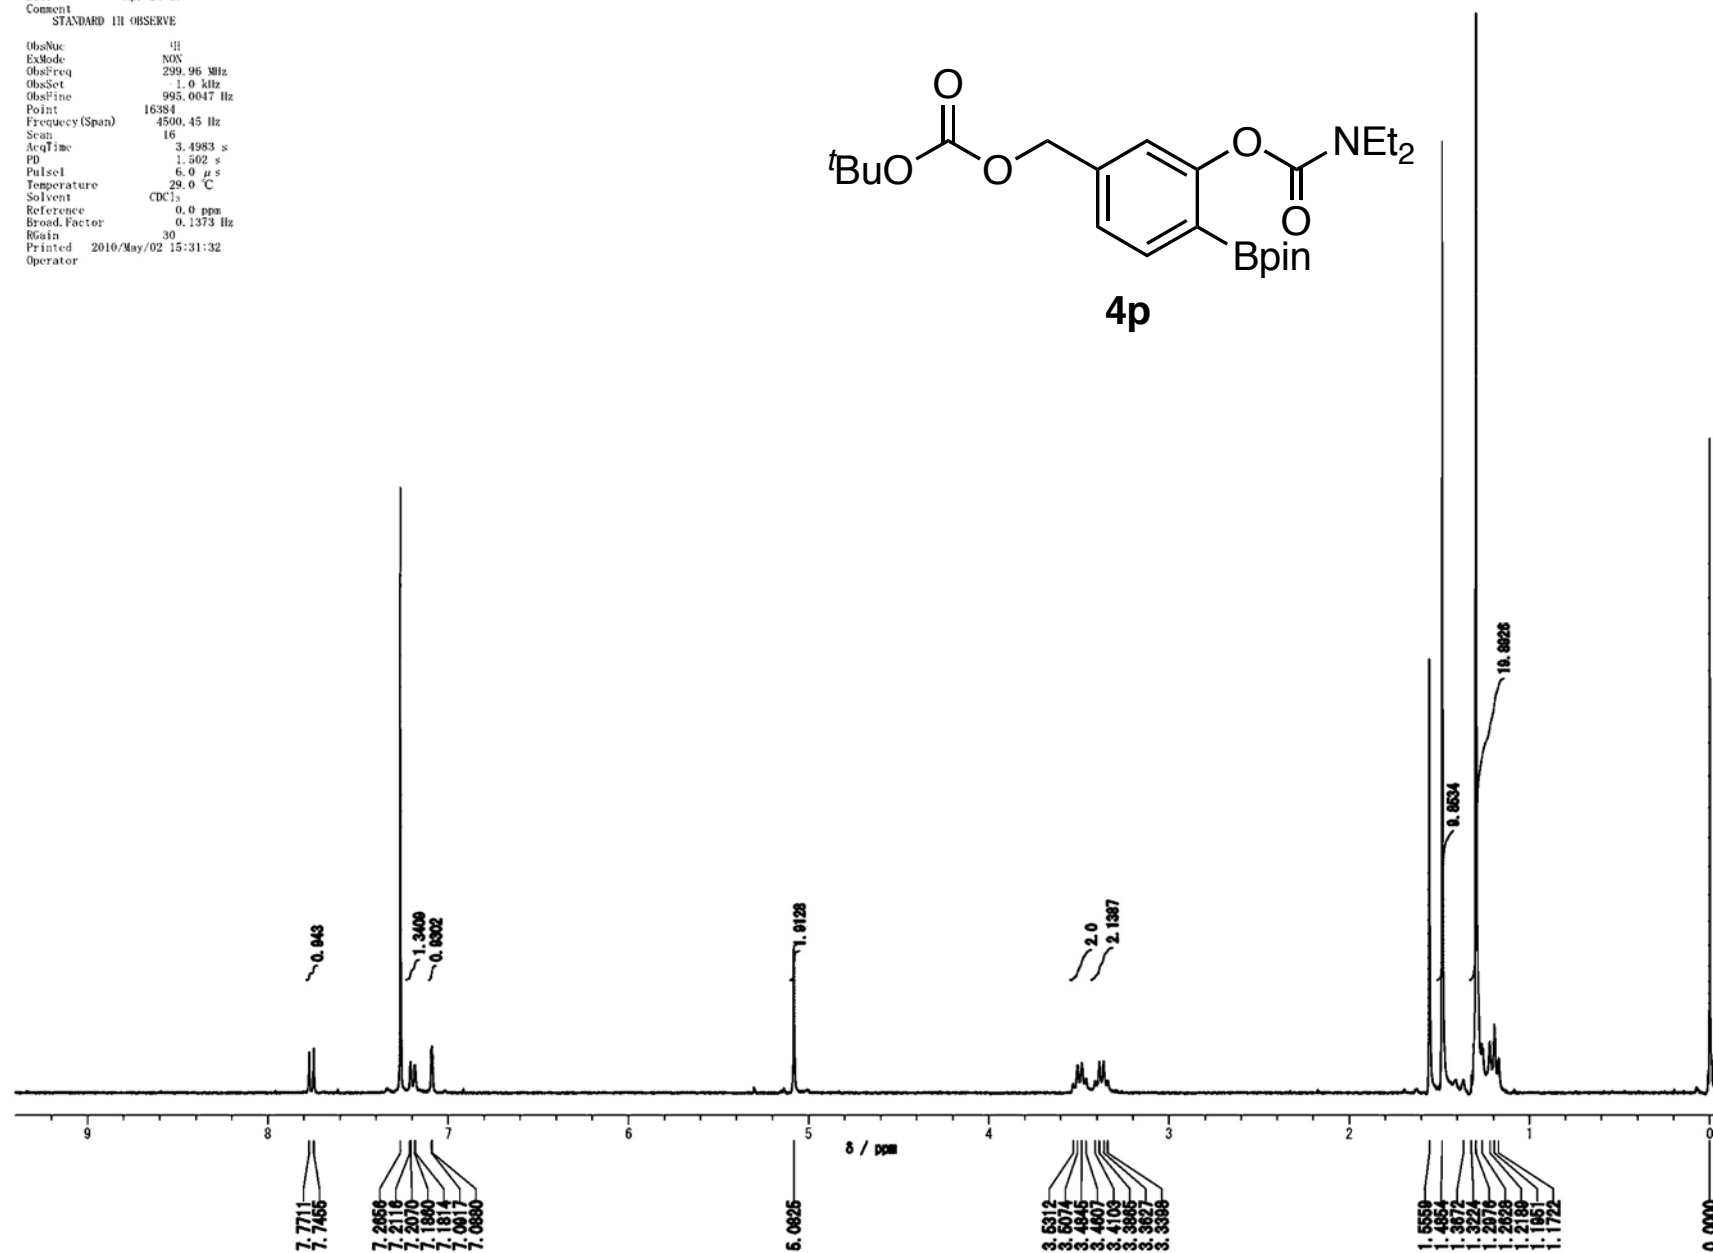

Comment  
 C13 Standard Observe  
 Stick=none Tune=6.4 Match=0.4  
 ObsNuc <sup>13</sup>C  
 ExMode NOX  
 ObsFreq 75.43 MHz  
 ObsSet -1.0 kHz  
 ObsFine 996.3672 Hz  
 Point 32768  
 Frequency (Span) 18761.73 Hz  
 Scan 64  
 AcqTime 1.4992 s  
 PD 1.501 s  
 Pulse 6.0  $\mu$ s  
 Temperature 29.0  $^{\circ}$ C  
 Solvent CDCl<sub>3</sub>  
 Reference 77.0 ppm  
 Broad. Factor 0.25 Hz  
 RGain 30  
 Printed 2010/May/02 15:34:34  
 Operator

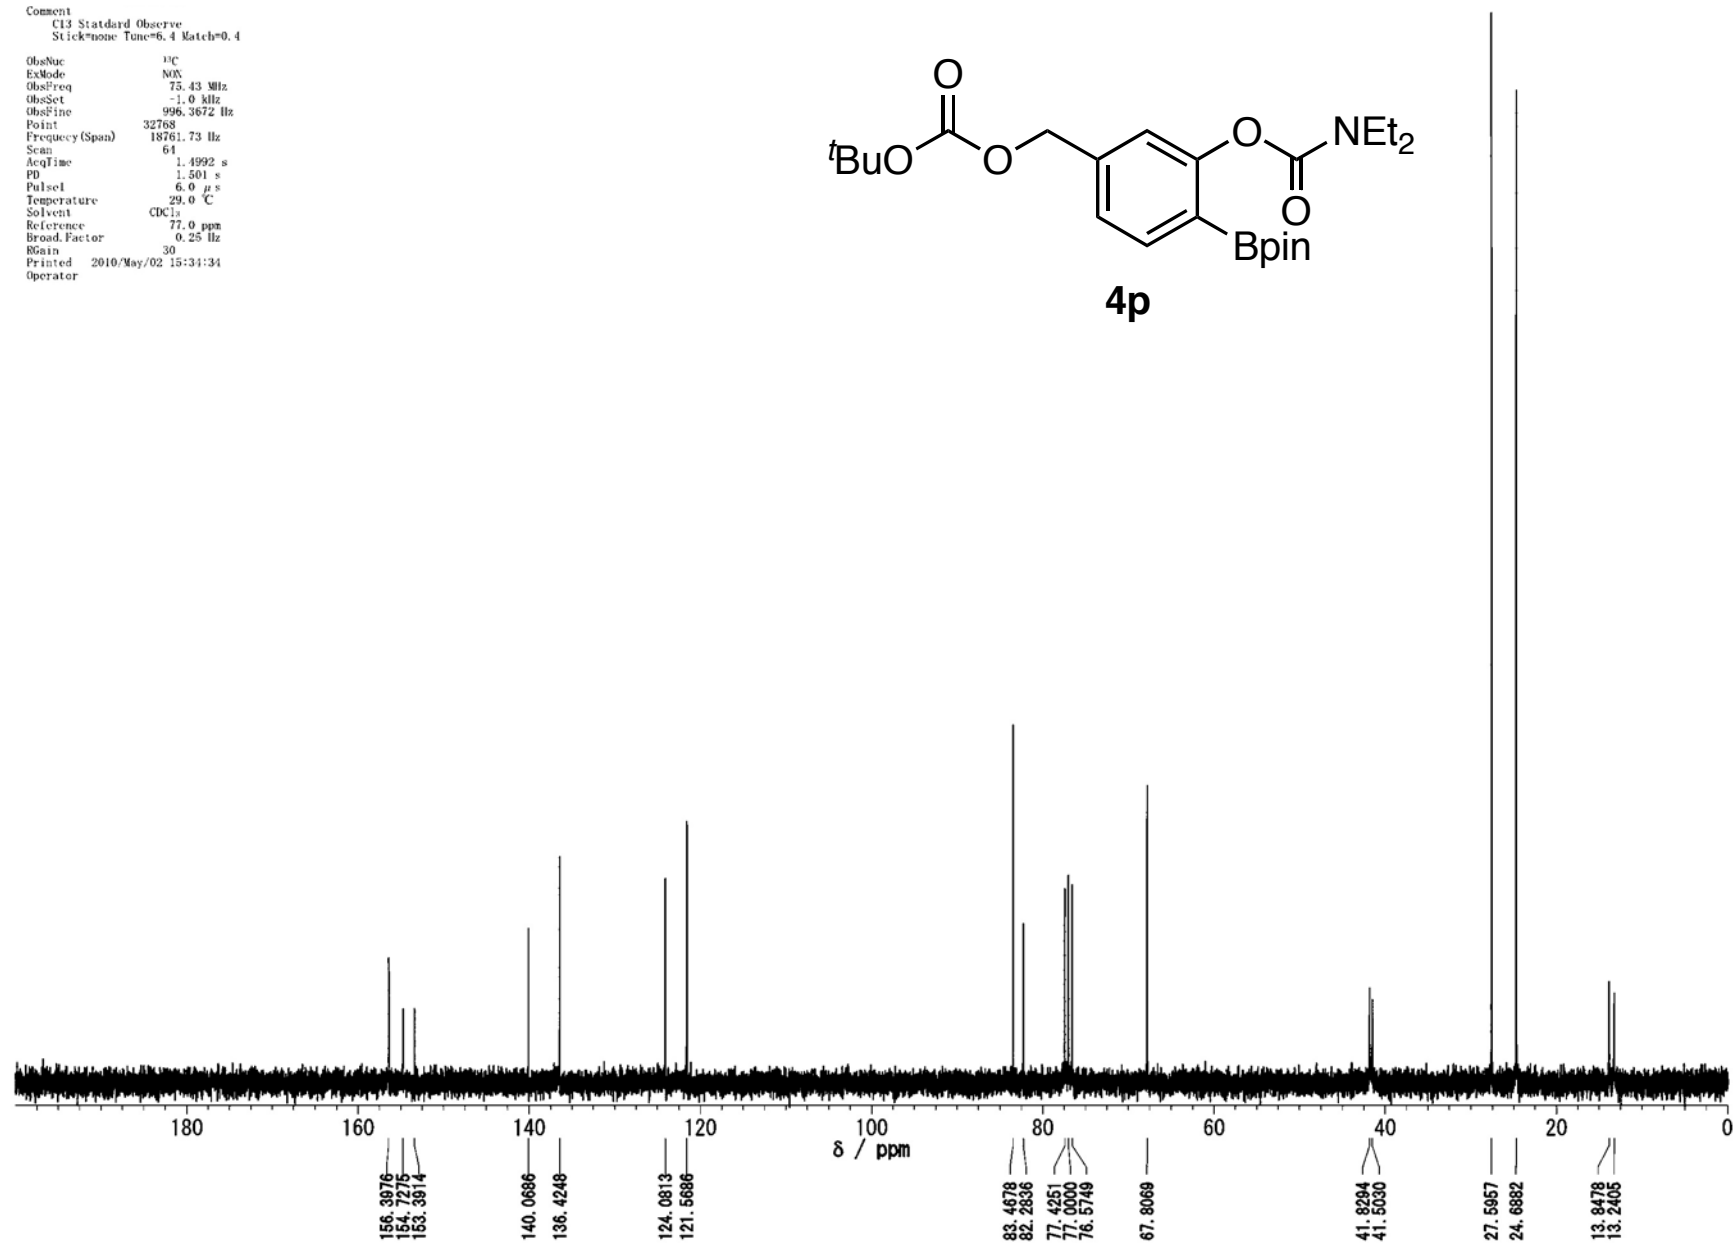

Original File:  
 Date Feb 24 10  
 Comment  
 STANDARD IN OBSERVE

ObsNuc <sup>1</sup>H  
 ExMode NON  
 ObsFreq 299.96 MHz  
 ObsSet 1.0 kHz  
 ObsFine 995.0047 Hz  
 Point 16384  
 Frequency (Span) 4500.45 Hz  
 Scan 16  
 AcqTime 3.4983 s  
 PD 1.502 s  
 Pulse 6.0  $\mu$ s  
 Temperature 29.0  $^{\circ}$ C  
 Solvent CDCl<sub>3</sub>  
 Reference 0.0 ppm  
 Broad Factor 0.1373 Hz  
 RGain 19  
 Printed 2010/Jun/24 14:59:26  
 Operator

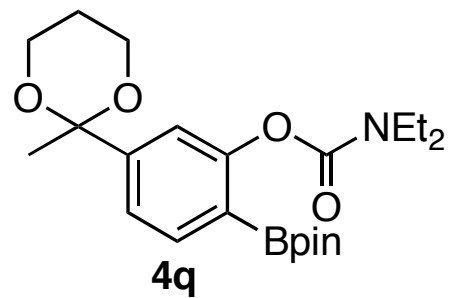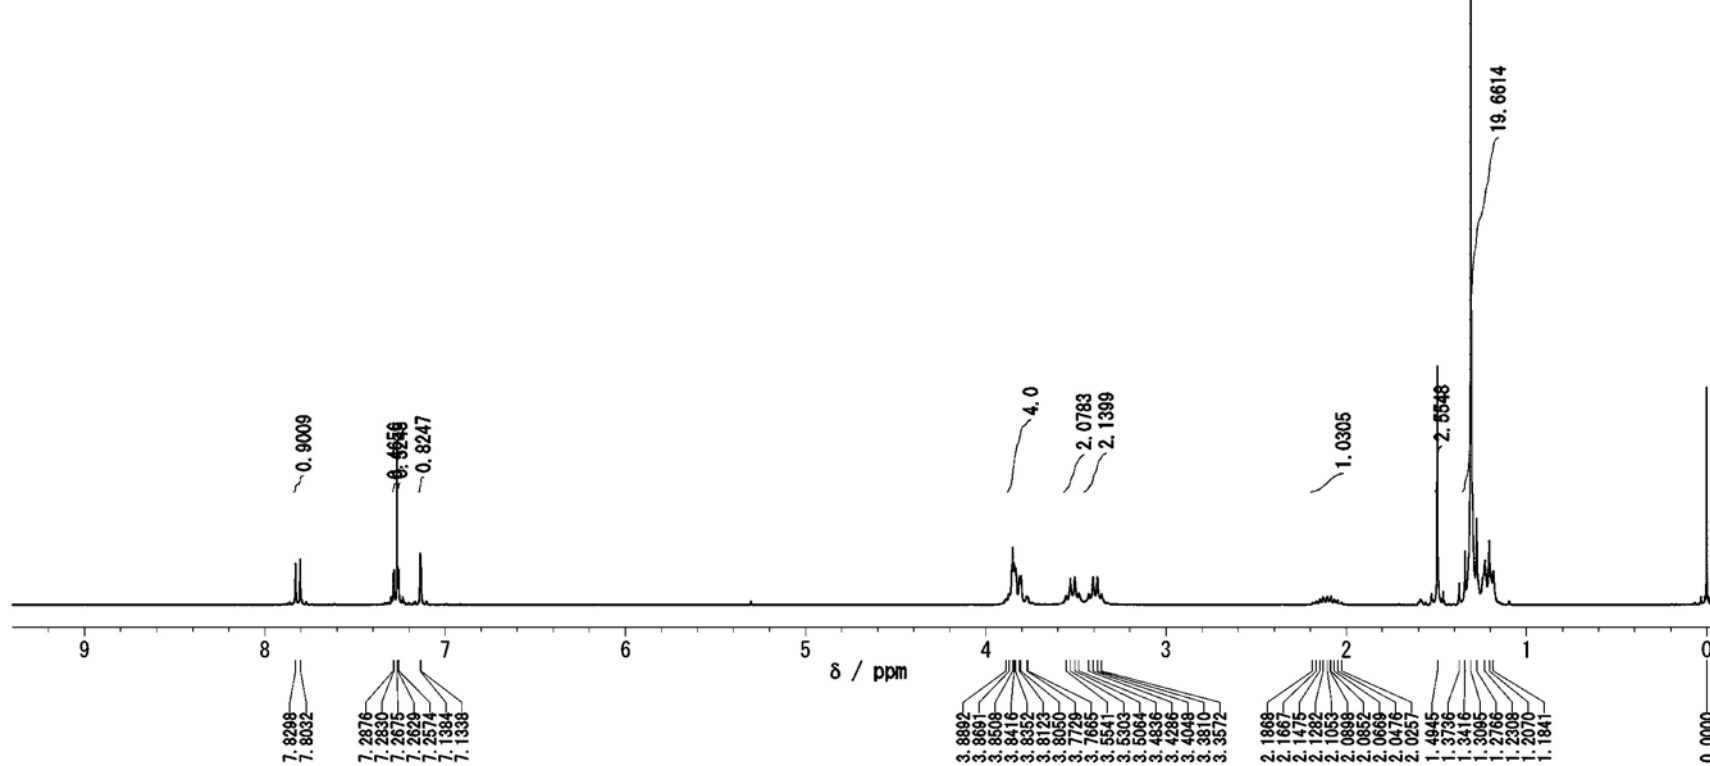

Original File:  
 Date Feb 25 10  
 Comment  
 C13 Standard Observe  
 Stick=none Tune=6.4 Match=0.4

ObsNuc <sup>13</sup>C  
 ExMode NON  
 ObsFreq 75.43 MHz  
 ObsSet 1.0 kHz  
 ObsFine 996.3672 Hz  
 Point 32768  
 Frequency (Span) 18761.73 Hz  
 Scan 128  
 AcqTime 1.4992 s  
 PD 1.501 s  
 Pulse 6.0  $\mu$ s  
 Temperature 29.0  $^{\circ}$ C  
 Solvent CDCl<sub>3</sub>  
 Reference 77.0 ppm  
 Broad.Factor 0.2863 Hz  
 RGain 30  
 Printed 2010/May/02 15:43:50  
 Operator

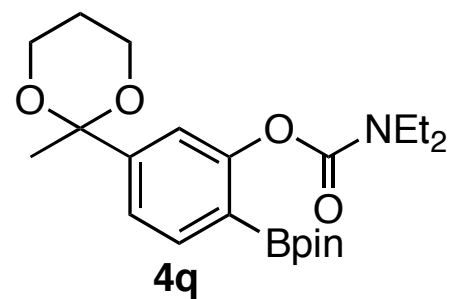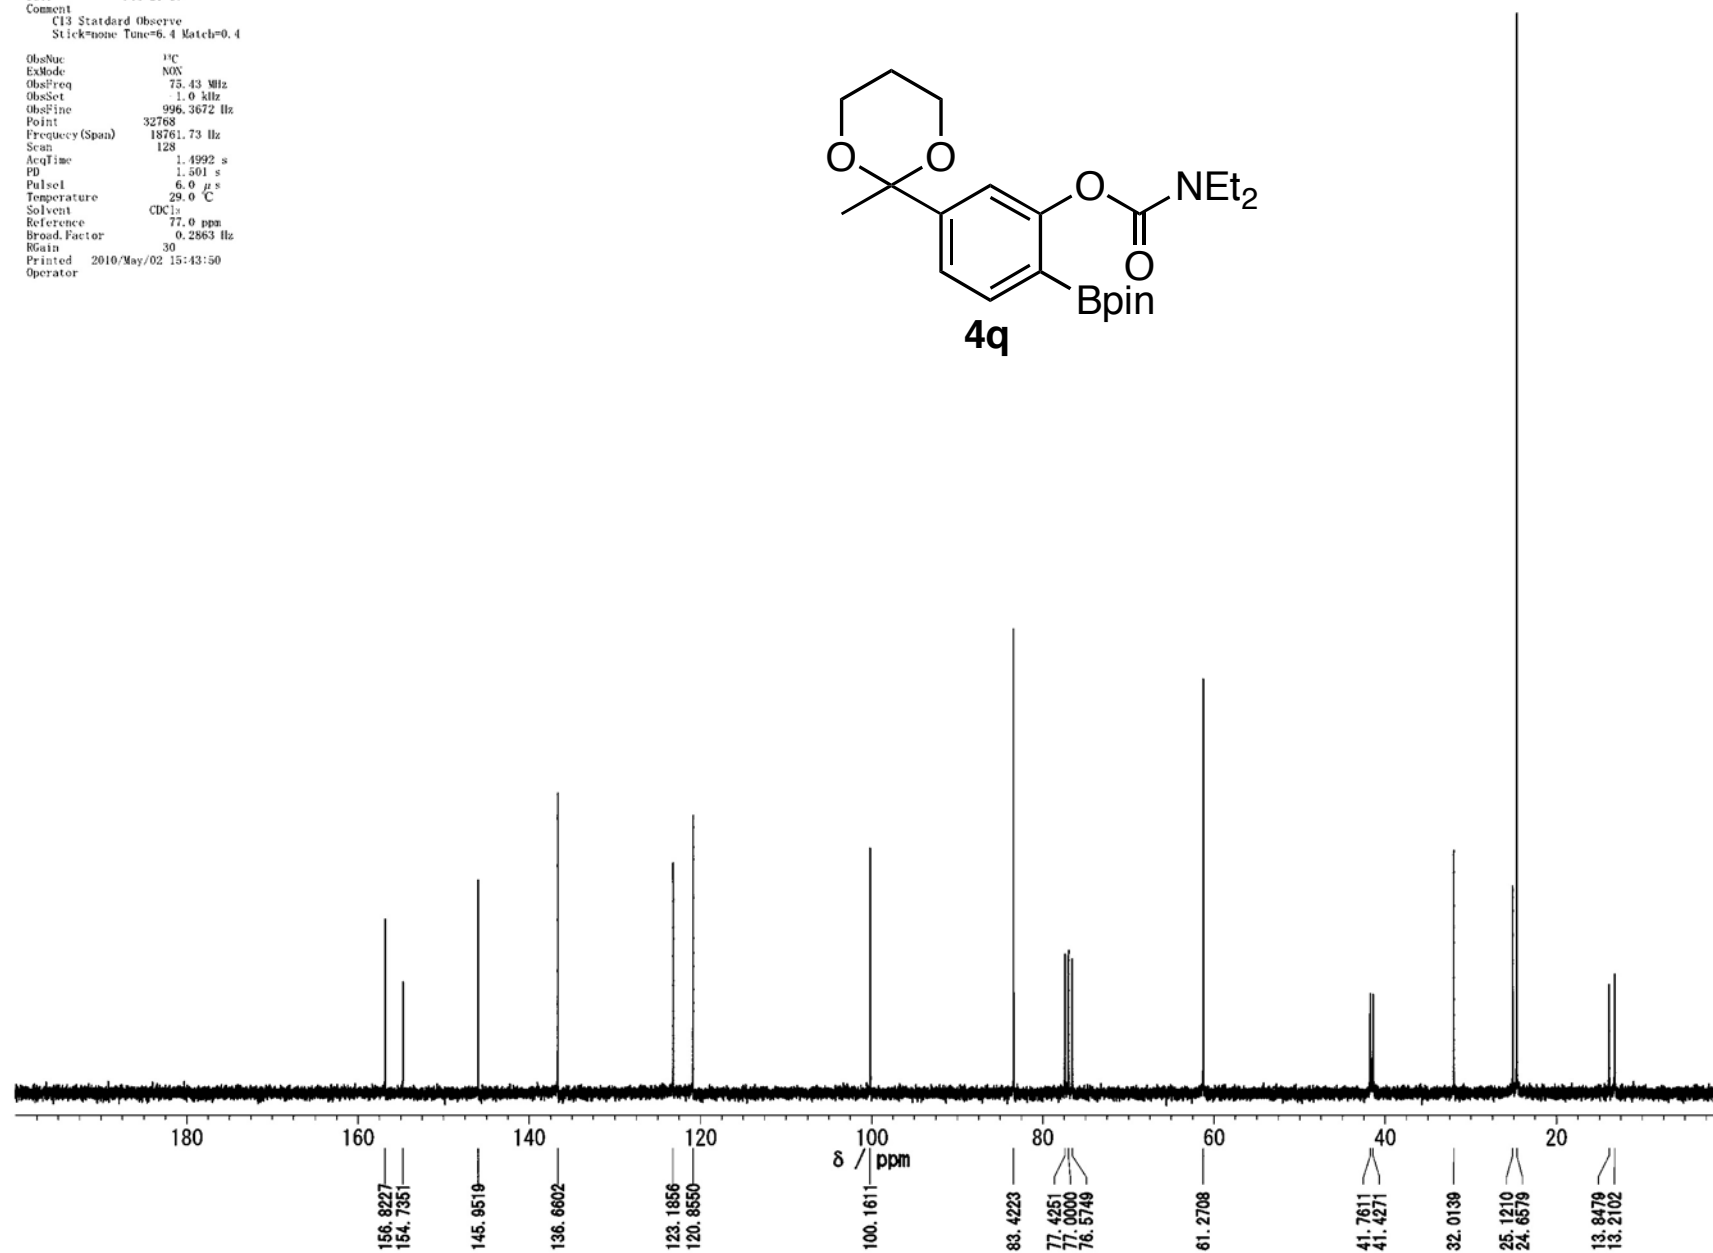

Original File:  
 Date Oct 3 09  
 Comment  
 STANDARD IN OBSERVE  
 ObsNuc <sup>1</sup>H  
 ExMode NON  
 ObsFreq 299.96 MHz  
 ObsSet 1.0 kHz  
 ObsFine 995.0047 Hz  
 Point 16384  
 Frequency (Span) 4500.45 Hz  
 Scan 16  
 AcqTime 3.4983 s  
 PD 1.502 s  
 Pulse 6.0  $\mu$ s  
 Temperature 29.0  $^{\circ}$ C  
 Solvent CDCl<sub>3</sub>  
 Reference 0.0 ppm  
 Broad Factor 0.1373 Hz  
 RGain 24  
 Printed 2010/May/02 15:54:10  
 Operator

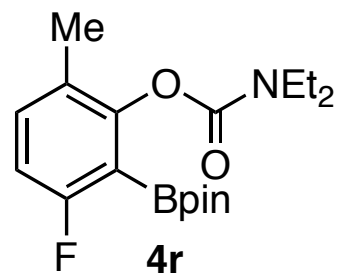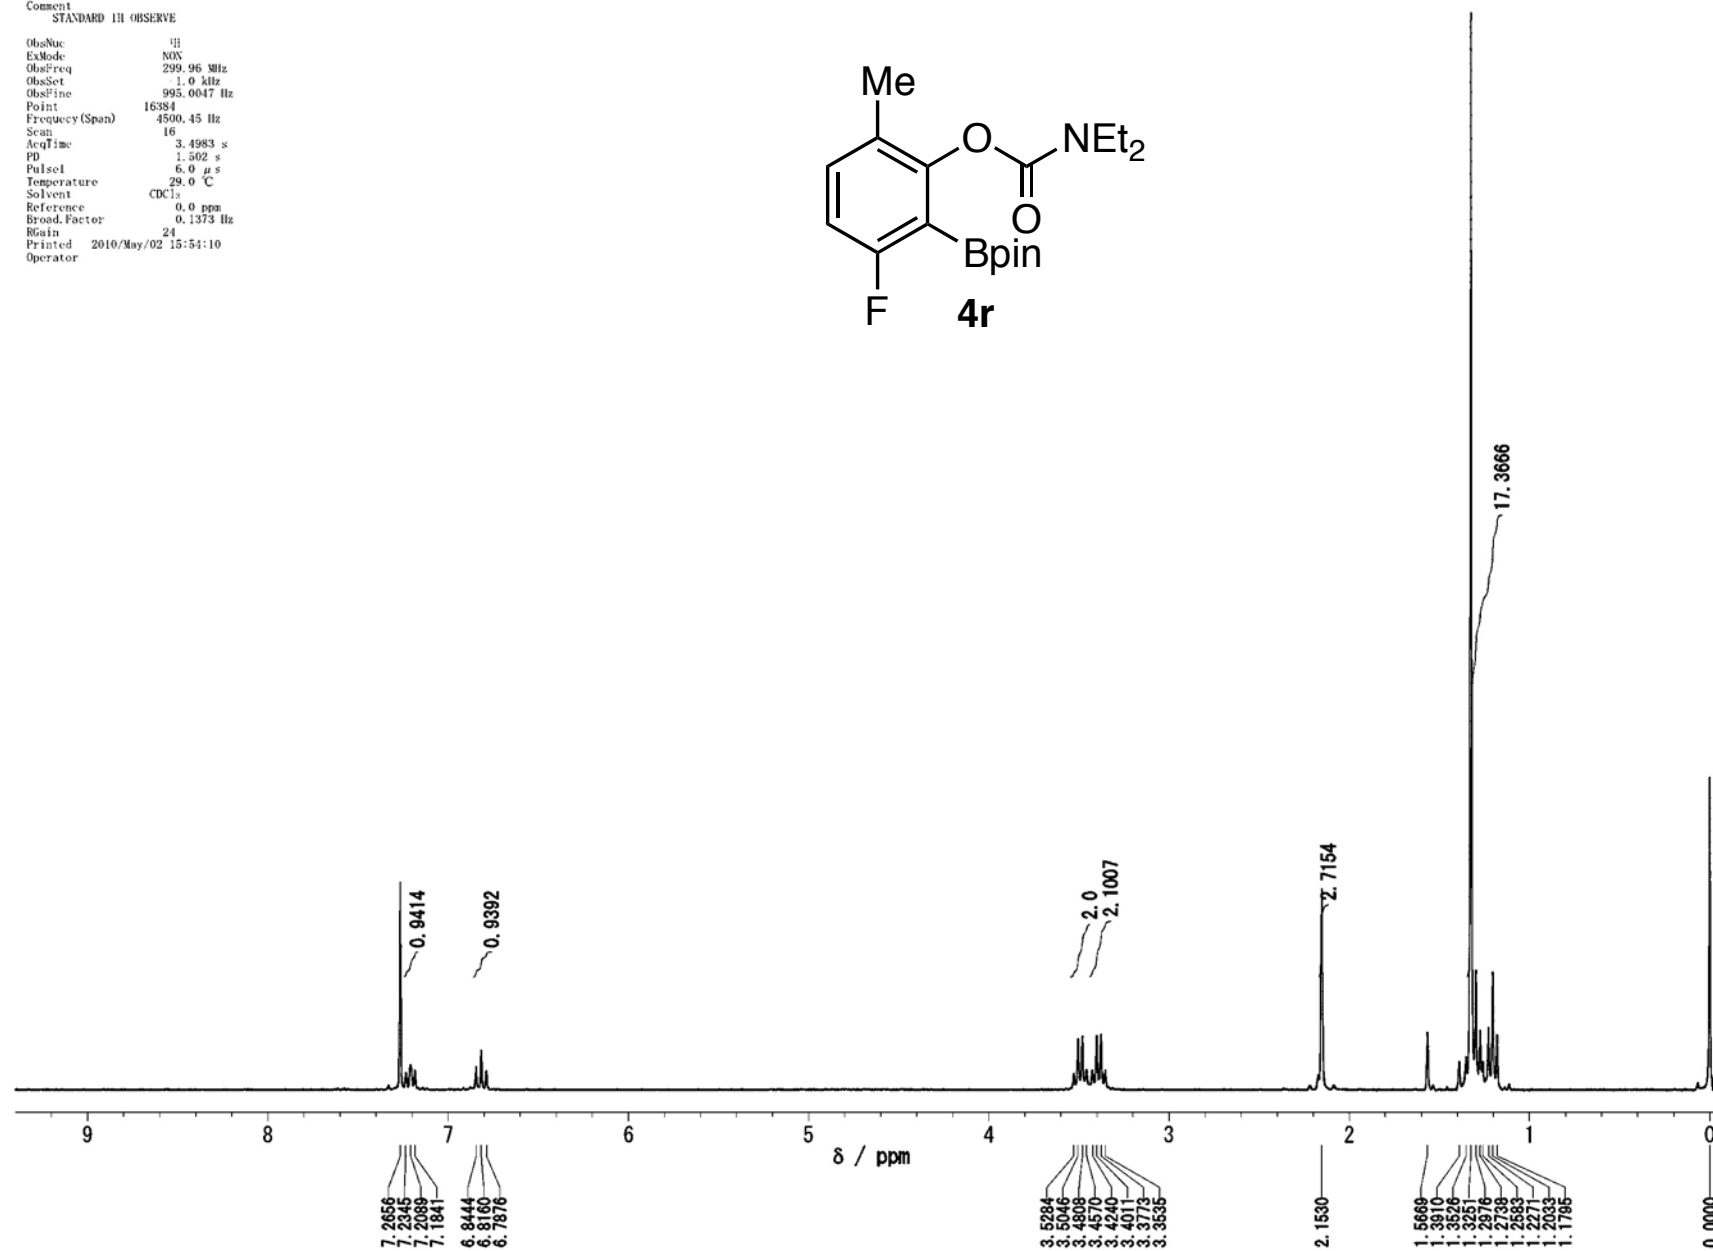



Original File:  
 Date Feb 22 10  
 Comment  
 C13 Standard Observe  
 Stick=none Tune=6.4 Match=0.4  
 ObsNuc <sup>13</sup>C  
 ExMode NON  
 ObsFreq 75.43 MHz  
 ObsSet 1.0 kHz  
 ObsFine 996.3672 Hz  
 Point 32768  
 Frequency (Span) 18761.73 Hz  
 Scan 128  
 AcqTime 1.4992 s  
 PD 1.501 s  
 Pulse 6.0  $\mu$ s  
 Temperature 29.0  $^{\circ}$ C  
 Solvent CDCl<sub>3</sub>  
 Reference 77.0 ppm  
 Broad Factor 0.2863 Hz  
 RGain 30  
 Printed 2010/May/02 15:56:04  
 Operator

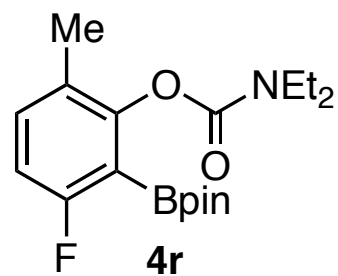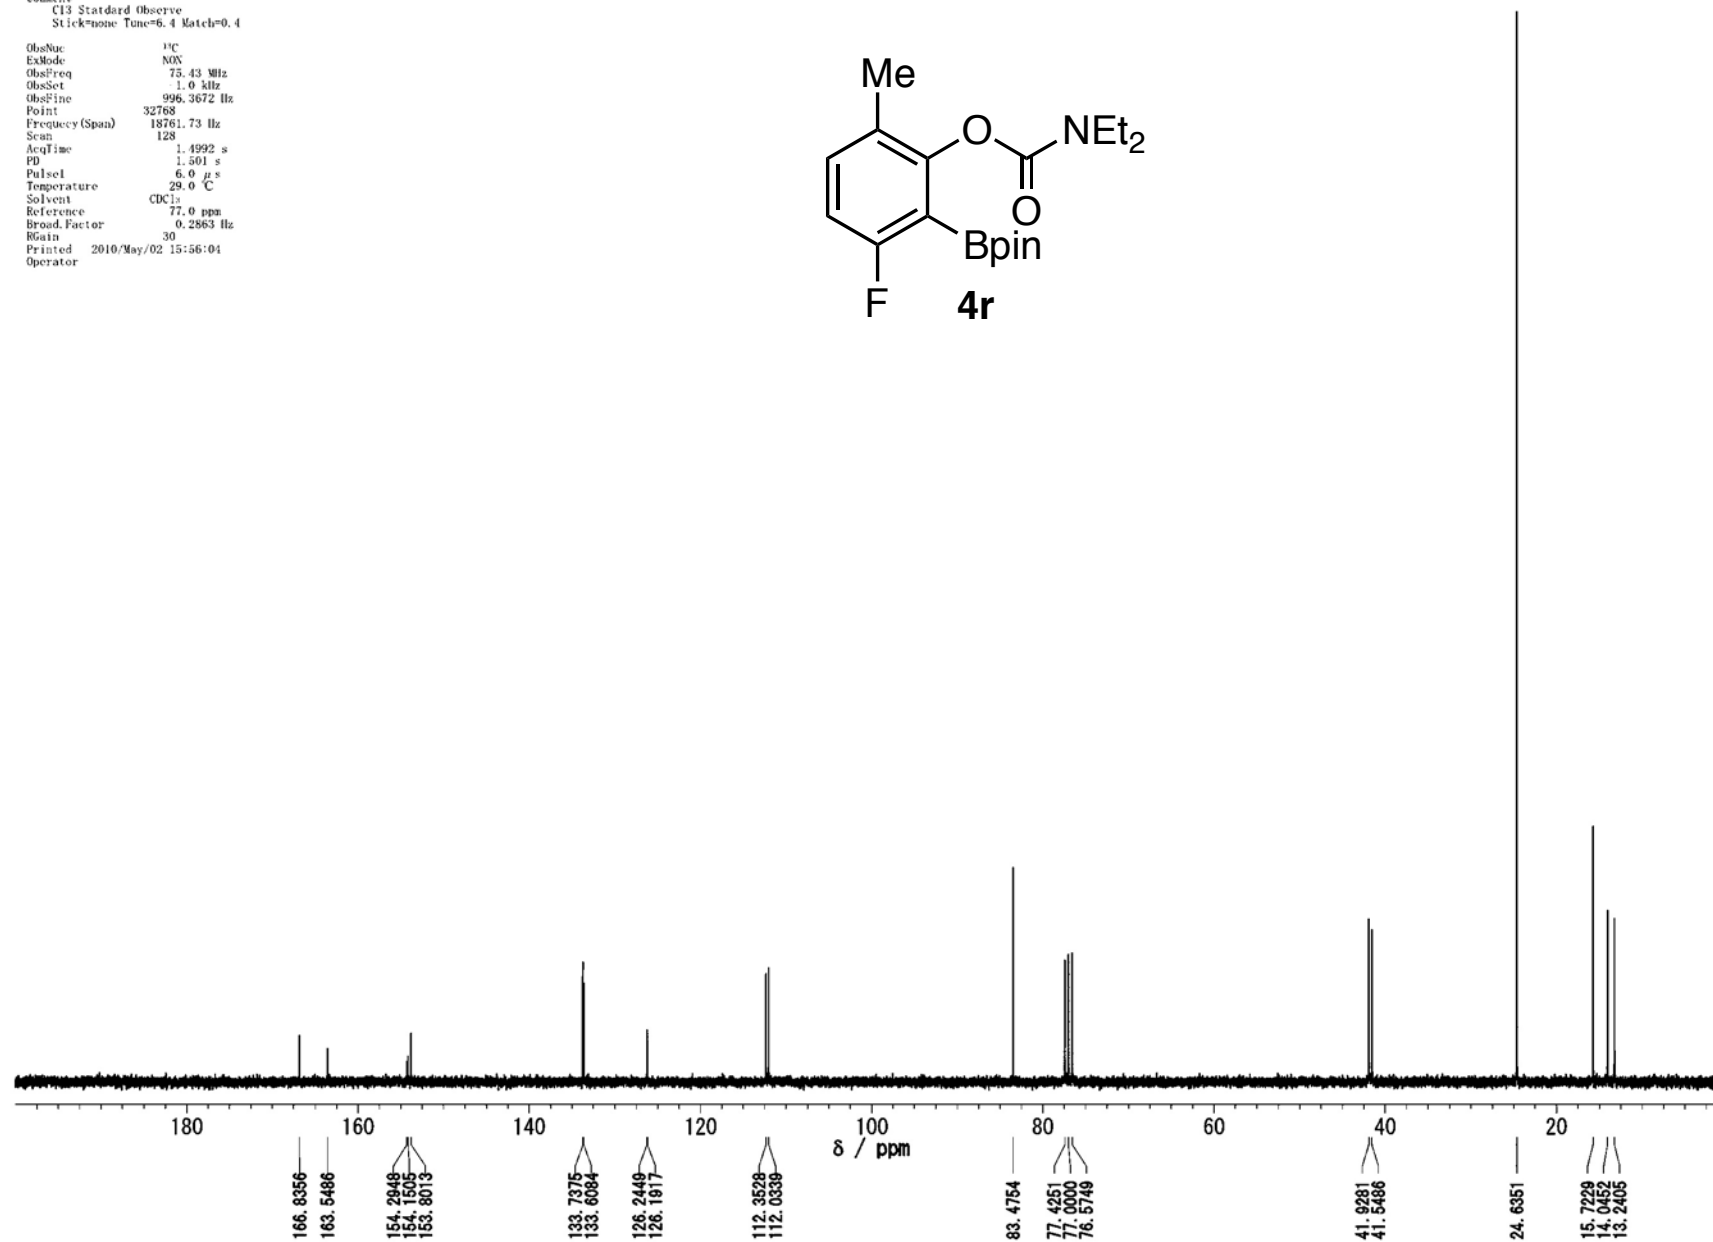

Original File: May 8 10  
 Date  
 Comment  
 STANDARD IN OBSERVE  
 ObsNuc <sup>1</sup>H  
 ExMode NON  
 ObsFreq 299.96 MHz  
 ObsSet 1.0 kHz  
 ObsFine 995.0047 Hz  
 Point 16384  
 Frequency (Span) 4500.45 Hz  
 Scan 16  
 AcqTime 3.4983 s  
 PD 1.502 s  
 Pulse 6.0  $\mu$ s  
 Temperature 29.0  $^{\circ}$ C  
 Solvent CDCl<sub>3</sub>  
 Reference 0.0 ppm  
 Broad Factor 0.1373 Hz  
 RGain 30  
 Printed 2010/Jun/24 15:01:35  
 Operator

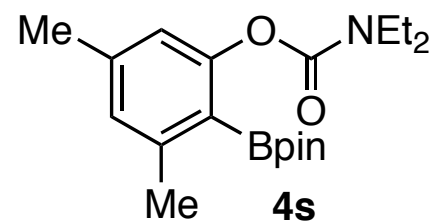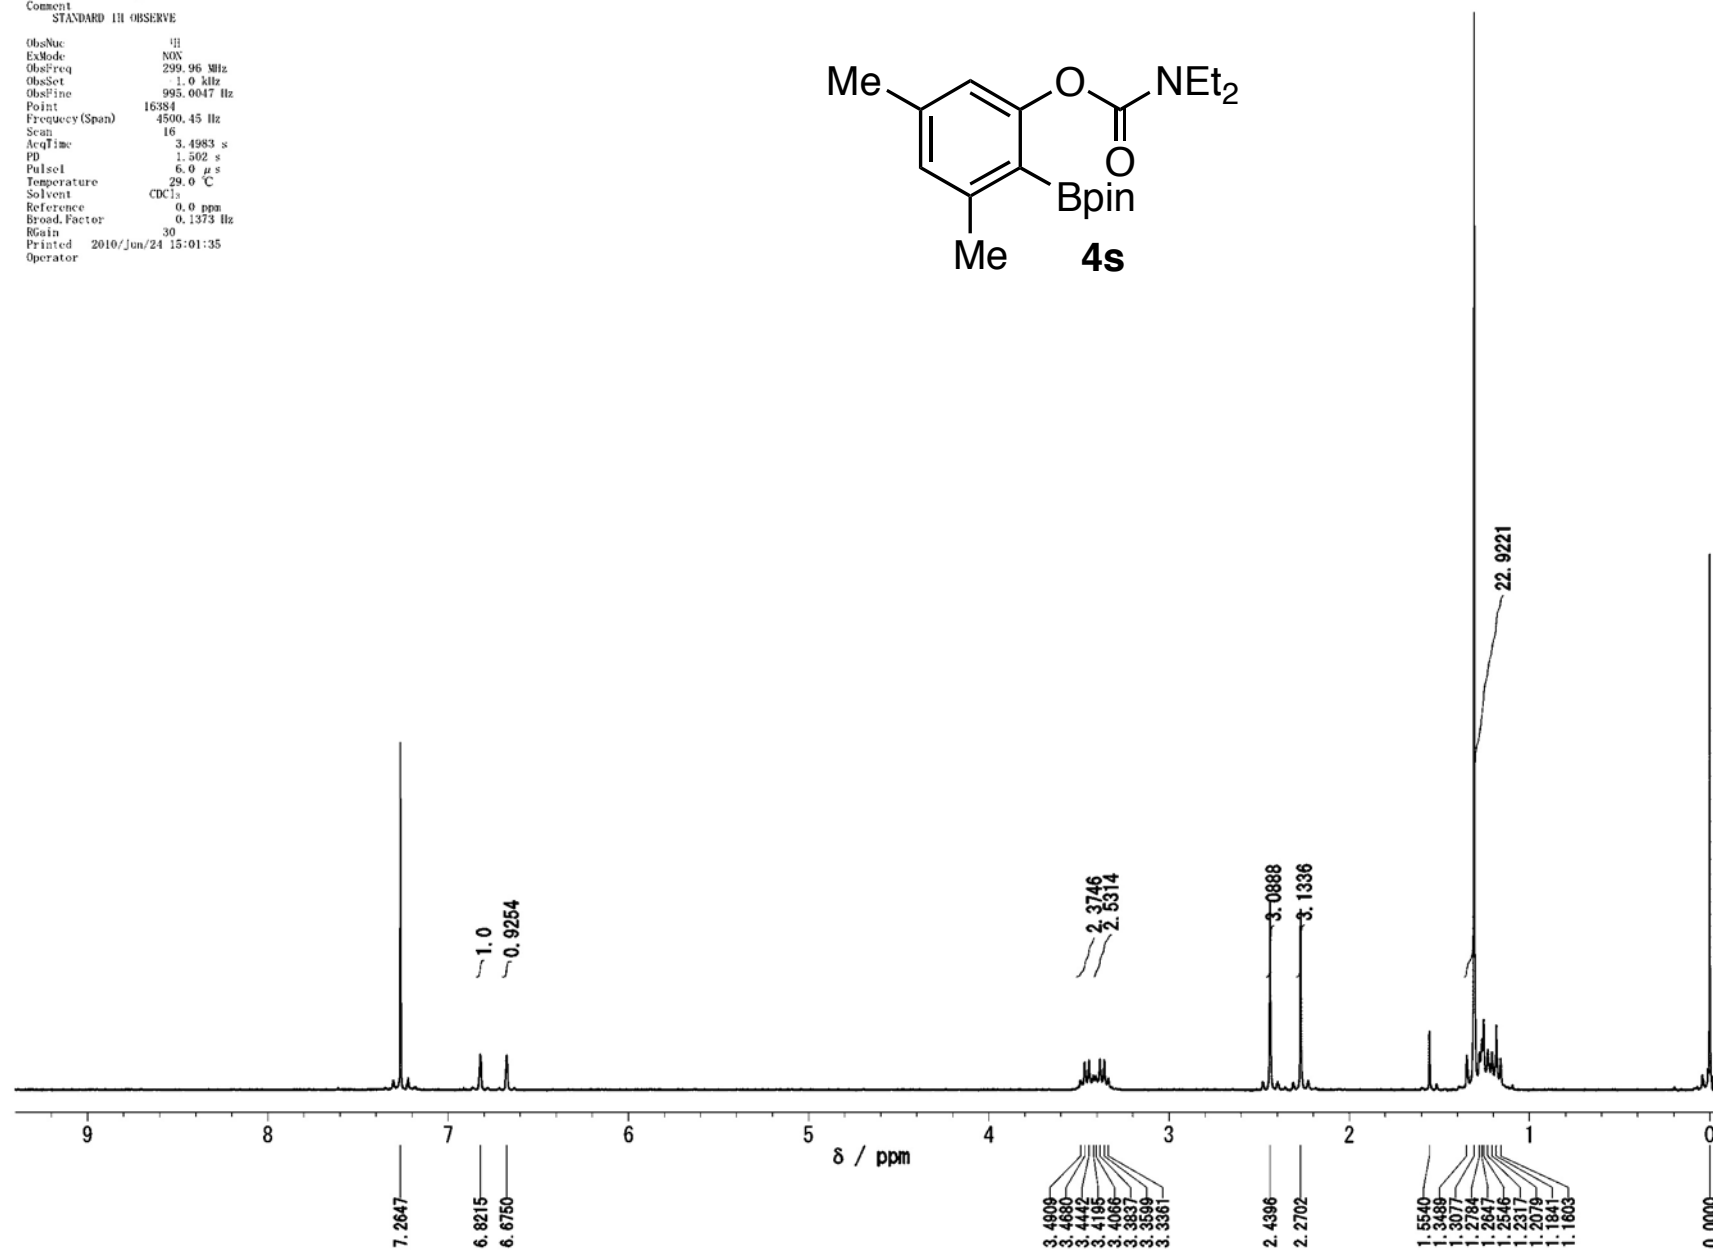

Date May 14 10  
 Comment C13 Standard Observe  
 Stick:none Tune=6.4 Match=0.4  
 ObsNuc <sup>13</sup>C  
 ExMode NON  
 ObsFreq 75.43 MHz  
 ObsSet 1.0 kHz  
 ObsFine 996.3672 Hz  
 Point 32768  
 Frequency (Span) 18761.73 Hz  
 Scan 256  
 AcqTime 1.4992 s  
 PD 1.501 s  
 Pulse 6.0 μs  
 Temperature 29.0 °C  
 Solvent CDCl<sub>3</sub>  
 Reference 77.0 ppm  
 Broad.Factor 0.25 Hz  
 RGain 30  
 Printed 2010/May/14 17:14:58  
 Operator

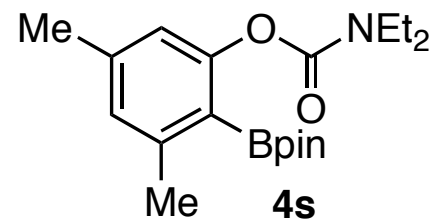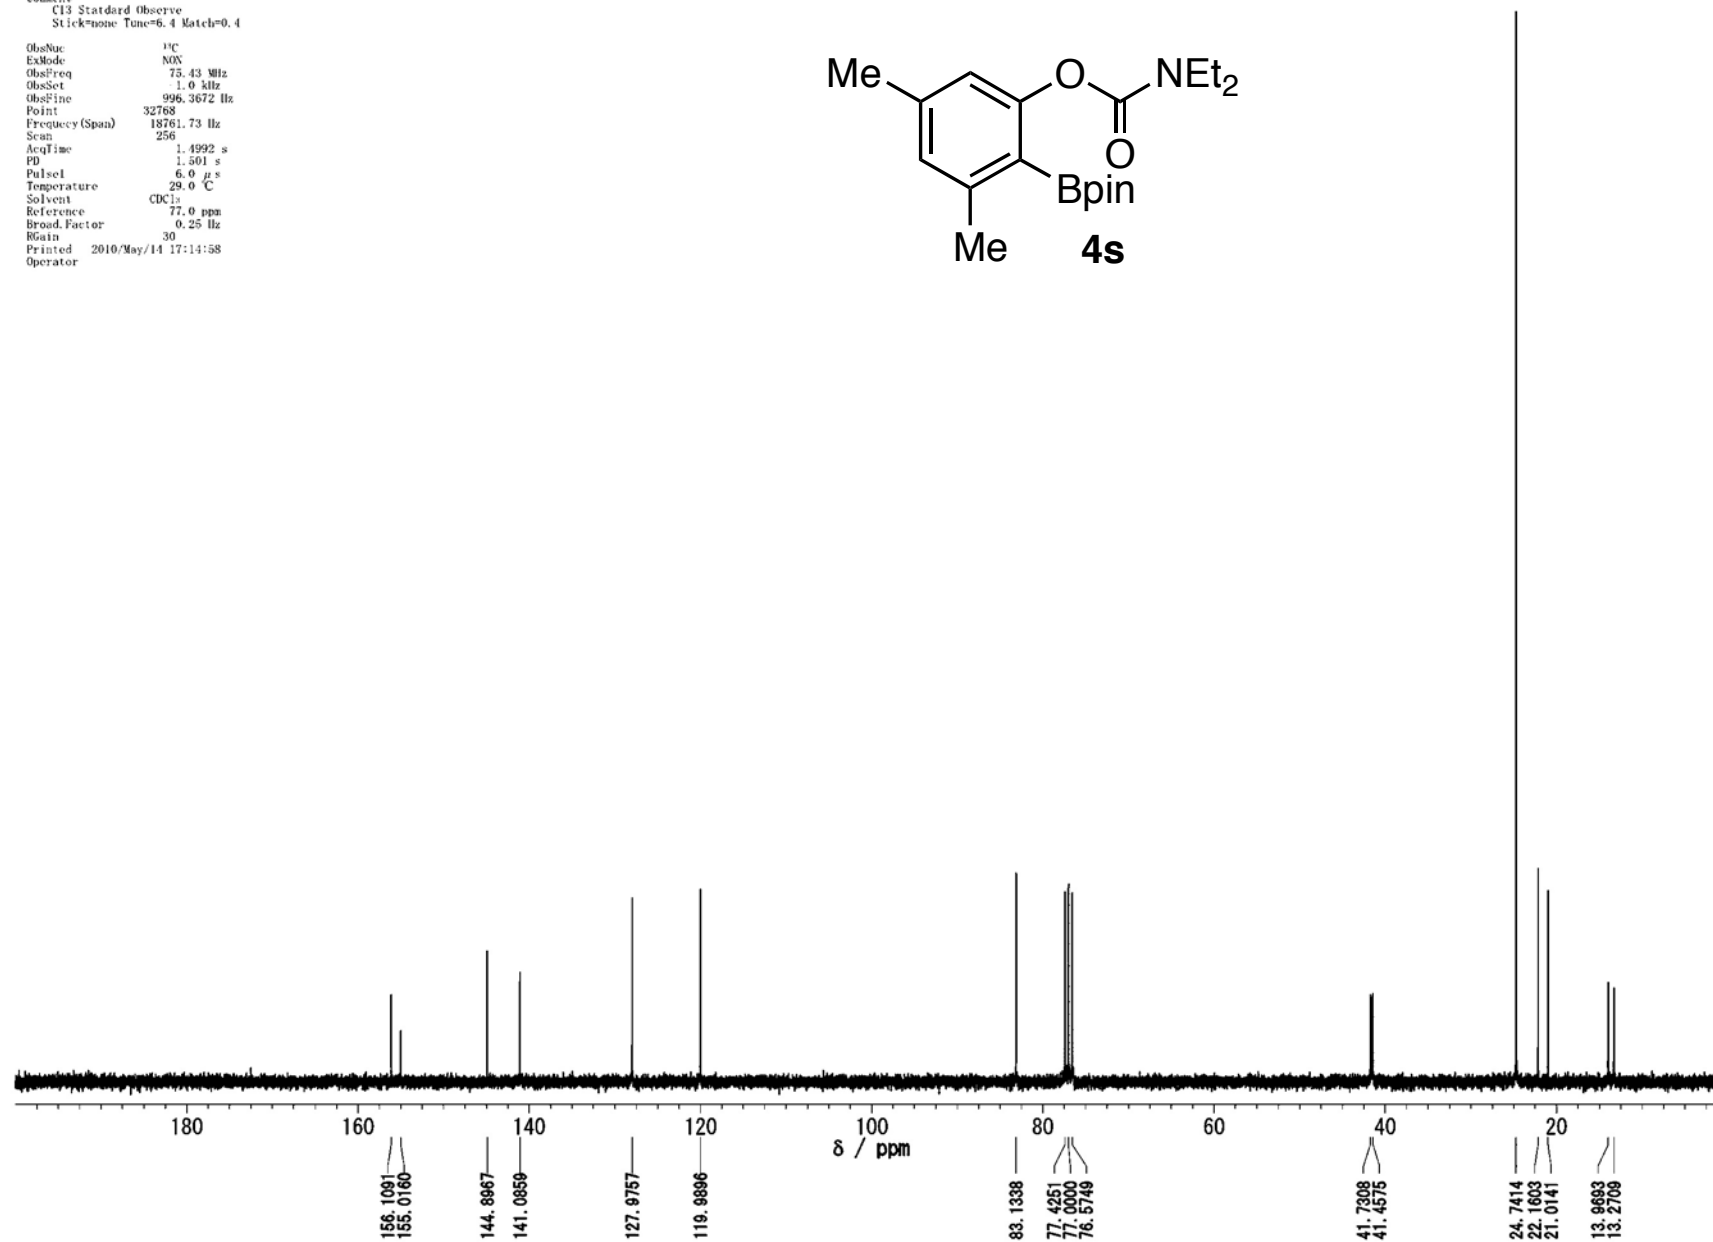

Original File:   
 Date: Jul 9 09   
 Comment: STANDARD 1H OBSERVE   
 ObsNuc: 1H   
 ExMode: NOX   
 ObsFreq: 299.96 MHz   
 ObsSet: 1.0 kHz   
 ObsPine: 995.0047 Hz   
 Point: 16384   
 Frequency (Span): 4500.45 Hz   
 Scan: 16   
 AcqTime: 3.4983 s   
 PD: 1.502 s   
 Pulse: 6.0  $\mu$ s   
 Temperature: 29.0  $^{\circ}$ C   
 Solvent: CDCl<sub>3</sub>   
 Reference: 0.0 ppm   
 Broad. Factor: 0.1373 Hz   
 RGain: 24   
 Printed: 2010/May/14 14:57:13   
 Operator:

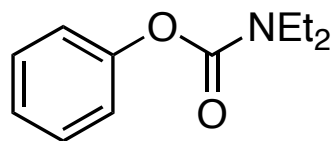

**3aa**

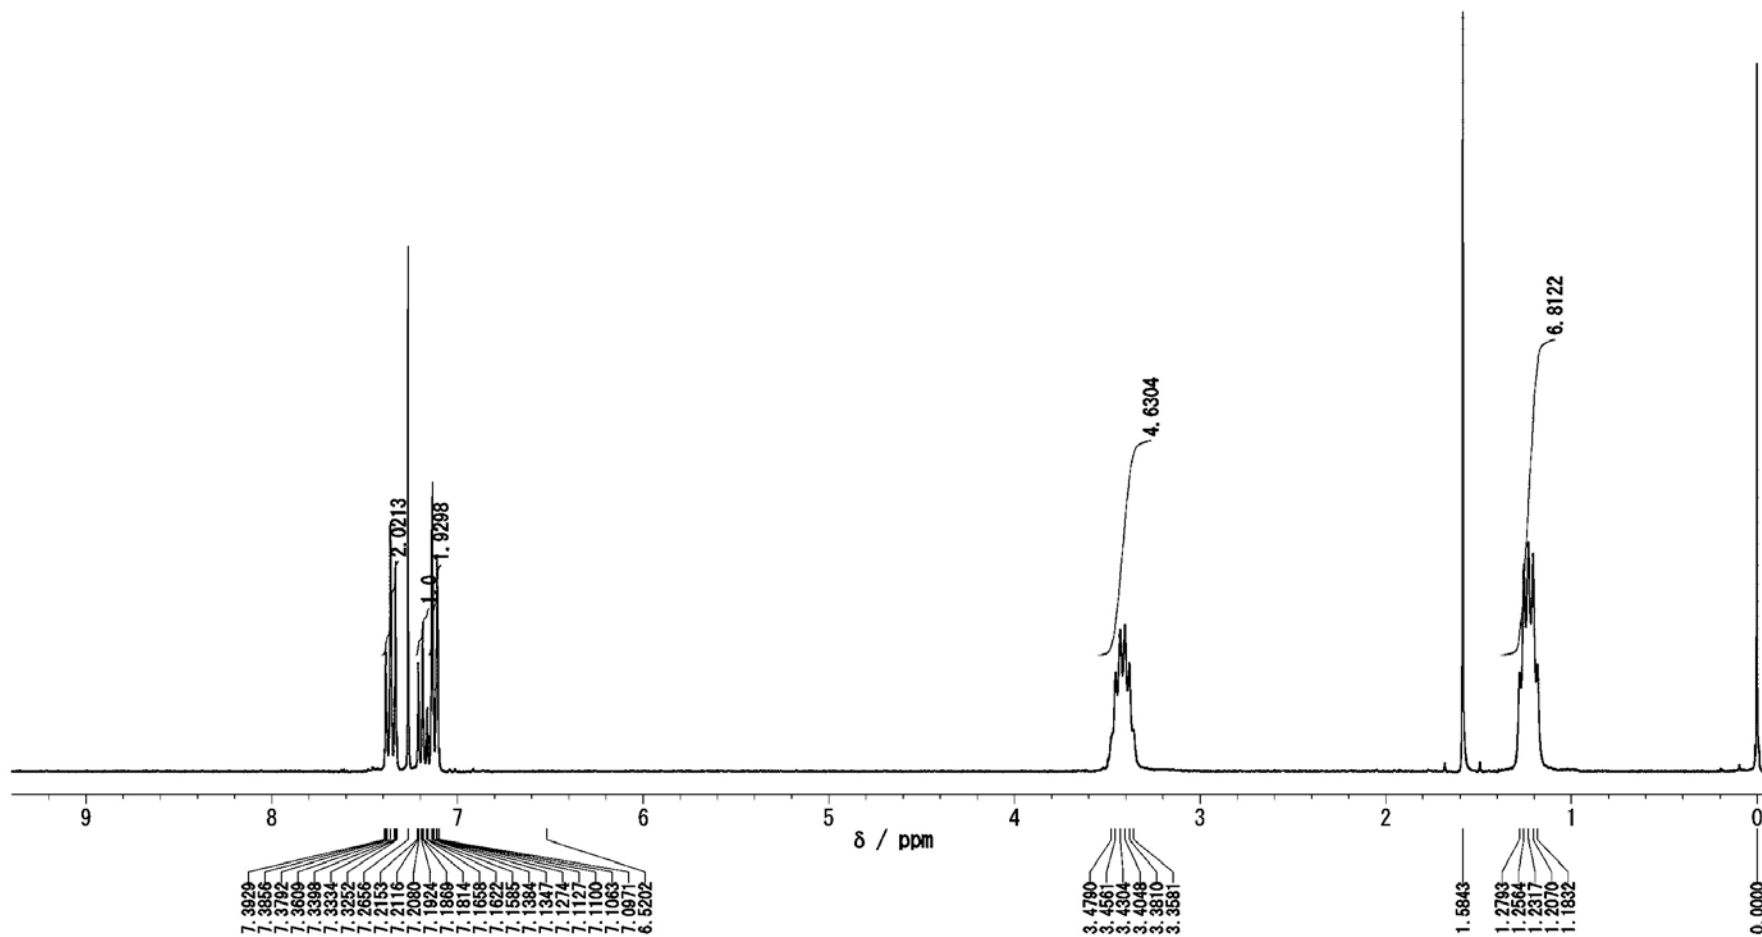

Original File: Mar 4 10  
 Date  
 Comment C13 Standard Observe  
 Stick\*none Tune=6.4 Match=0.4

ObsNuc  $^{13}\text{C}$   
 ExMode NOX  
 ObsFreq 75.43 MHz  
 ObsSet -1.0 kHz  
 ObsFine 996.3672 Hz  
 Point 32768  
 Frequency (Span) 18761.73 Hz  
 Scan 128  
 AcqTime 1.4992 s  
 PD 1.501 s  
 Pulse1 6.0  $\mu\text{s}$   
 Temperature 29.0  $^{\circ}\text{C}$   
 Solvent  $\text{CDCl}_3$   
 Reference 77.0 ppm  
 BroadFactor 0.2863 Hz  
 RGain 30  
 Printed 2010/May/14 15:18:36  
 Operator

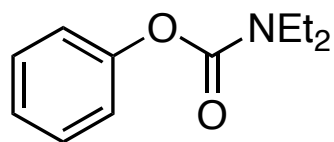

**3aa**

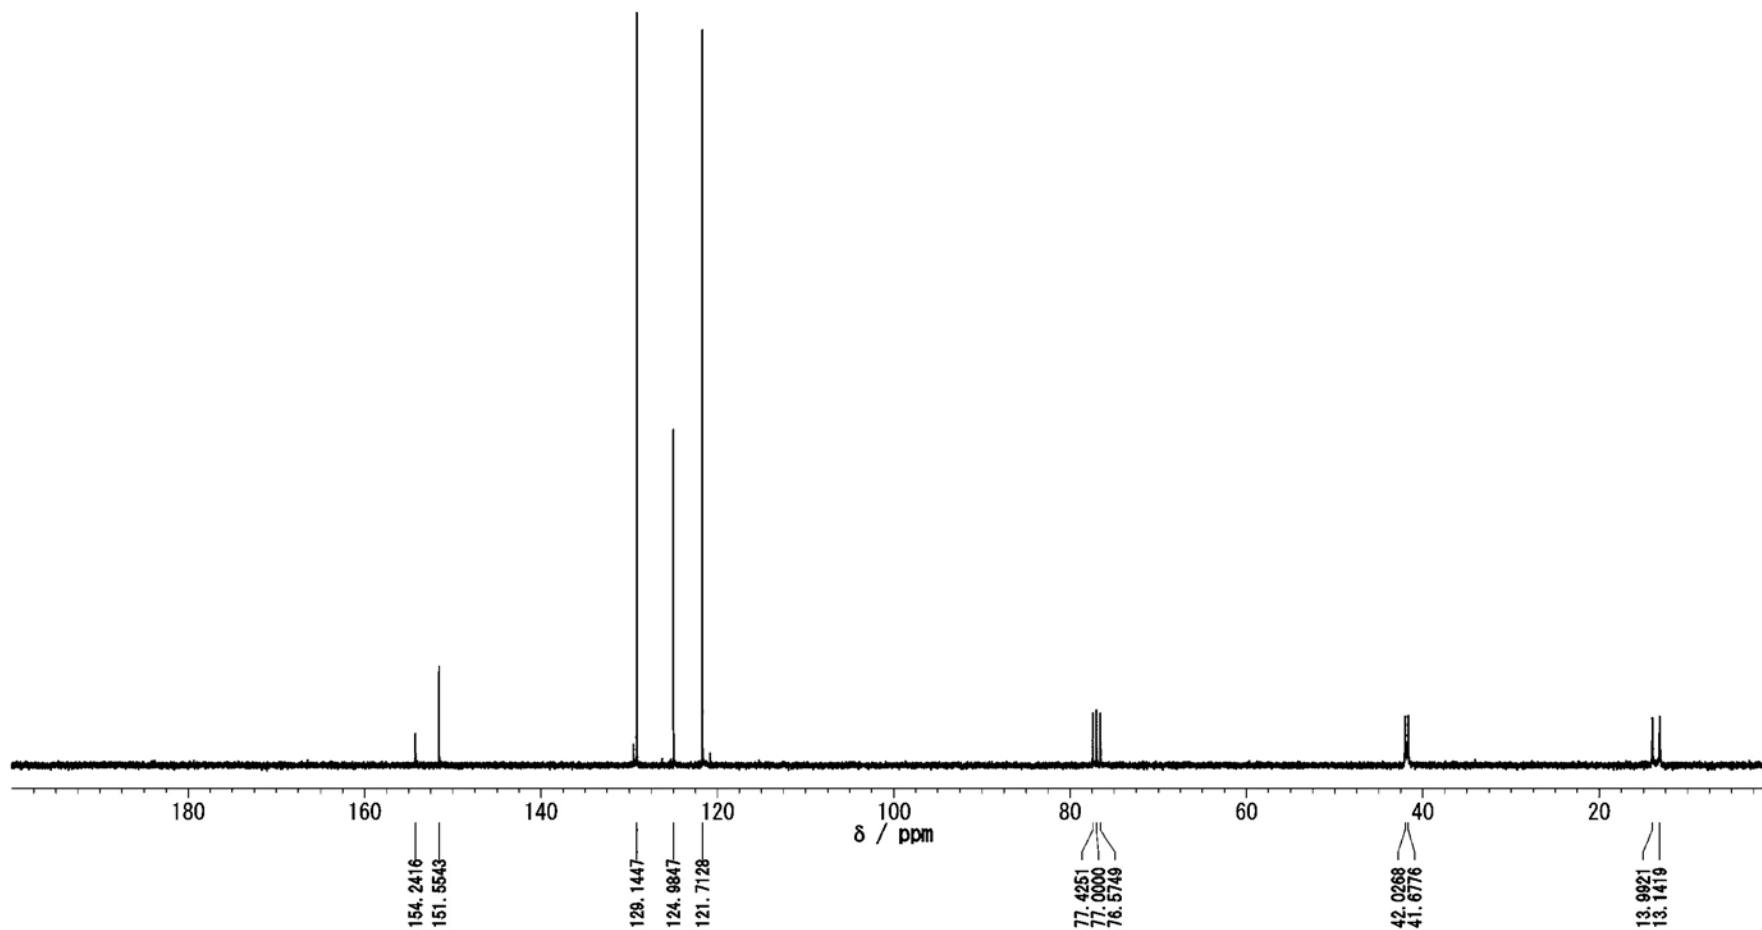

STANDARD III OBSERVE

|                  |                      |
|------------------|----------------------|
| ObsNuc           | <sup>1</sup> H       |
| ExMode           | NOV                  |
| ObsFreq          | 299.96 MHz           |
| ObsSet           | 1.0 kHz              |
| ObsFine          | 995.0047 Hz          |
| Point            | 16384                |
| Frequency (Span) | 4500.45 Hz           |
| Scan             | 16                   |
| AcqTime          | 3.4983 s             |
| PD               | 1.502 s              |
| Pulse1           | 6.0 $\mu$ s          |
| Temperature      | 29.0 $^{\circ}$ C    |
| Solvent          | CDCl <sub>3</sub>    |
| Reference        | 0.0 ppm              |
| Broad_Factor     | 0.25 Hz              |
| RGain            | 6                    |
| Printed          | 2010/May/17 15:13:36 |
| Operator         |                      |

1S  
FIDVfid

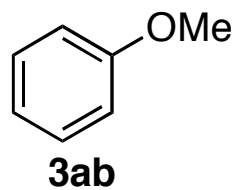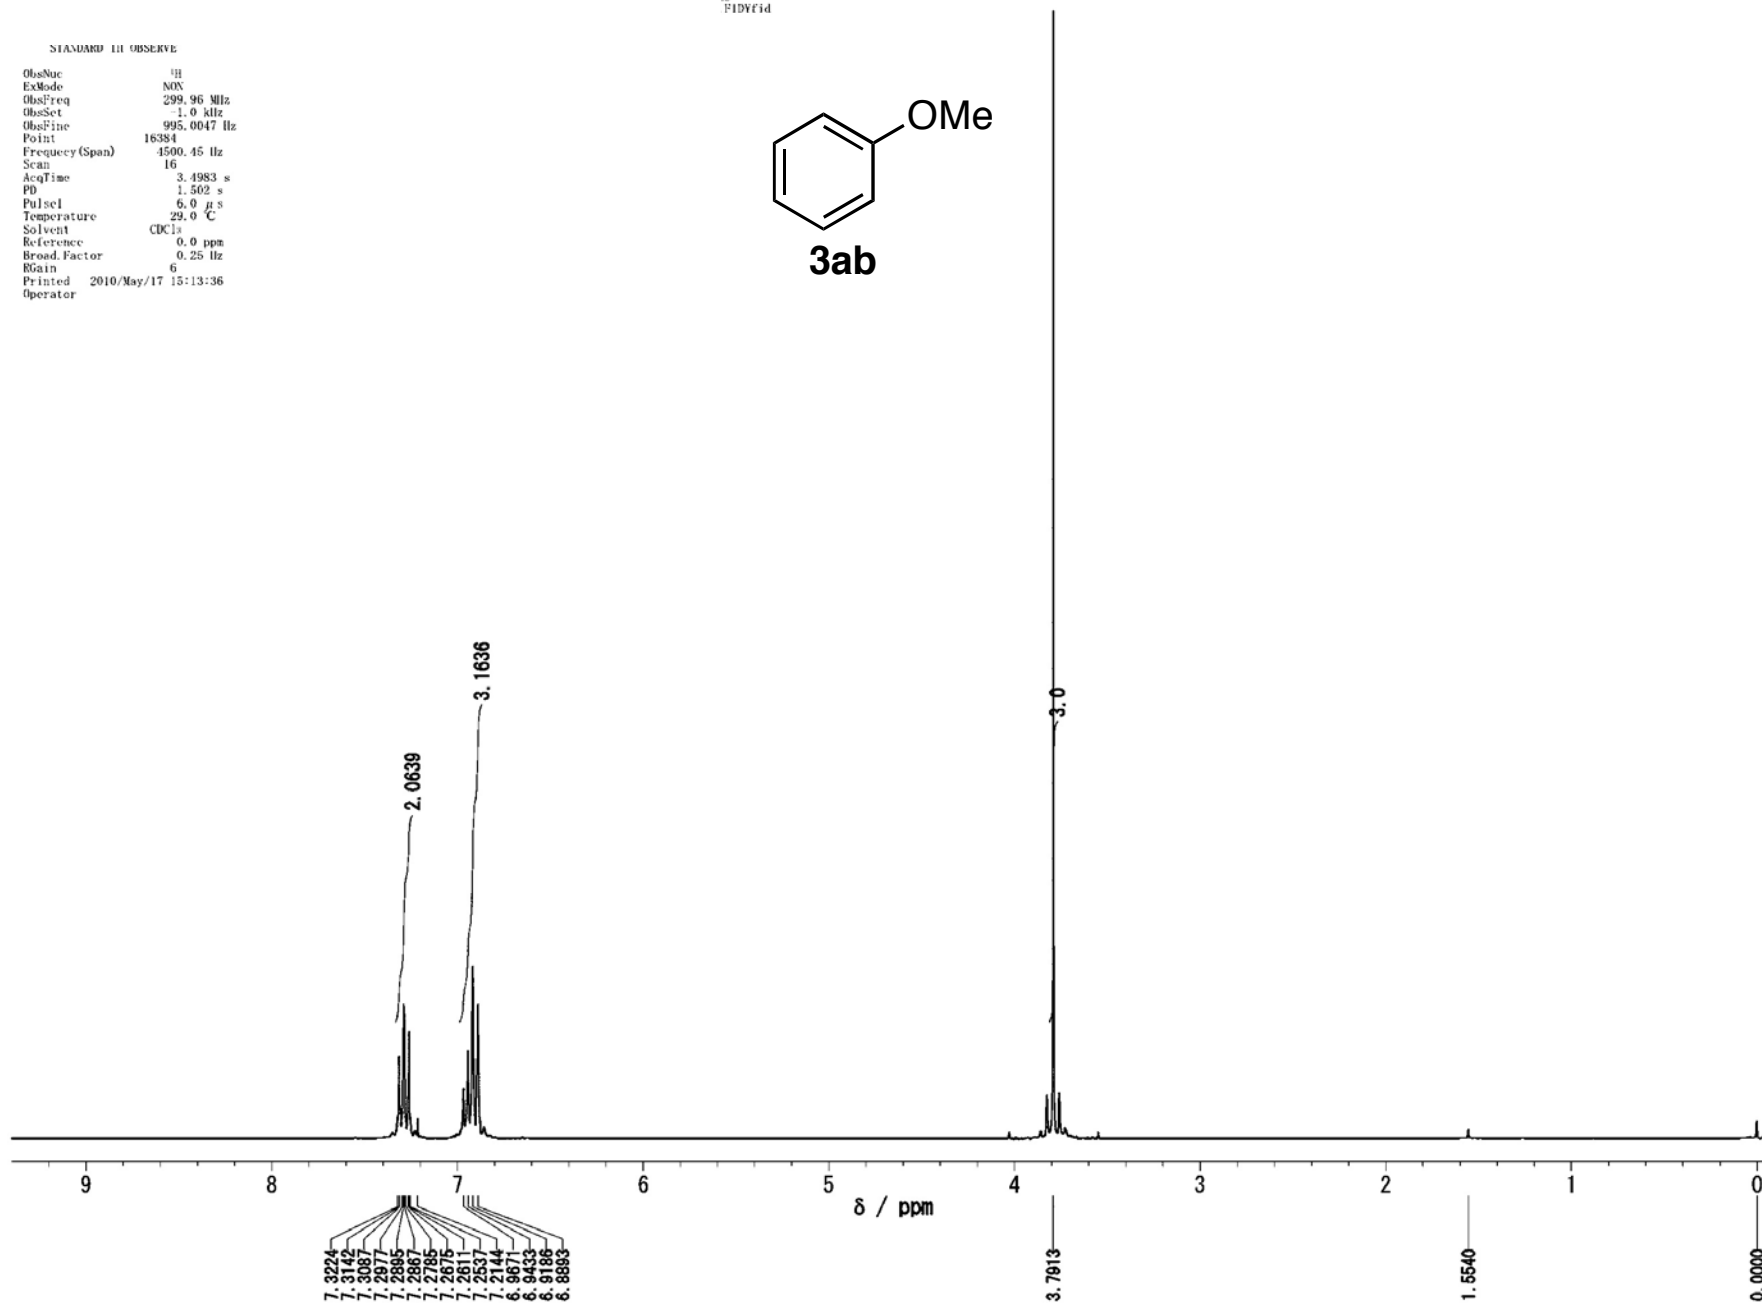

ID FOR PA  
-13C.FIDV

Stick=none Tune=6.4 Match=0.4

|                 |                      |
|-----------------|----------------------|
| ObsNuc          | <sup>13</sup> C      |
| ExMode          | NOV                  |
| ObsFreq         | 75.43 MHz            |
| ObsSet          | -1.0 kHz             |
| ObsPine         | 996.3672 Hz          |
| Point           | 32768                |
| Frequency(Span) | 18761.73 Hz          |
| Scan            | 128                  |
| AcqTime         | 1.4992 s             |
| PD              | 1.501 s              |
| Pulse1          | 6.0 μs               |
| Temperature     | 29.0 °C              |
| Solvent         | CDCl <sub>3</sub>    |
| Reference       | 77.0 ppm             |
| Broad.Factor    | 0.25 Hz              |
| RGain           | 30                   |
| Printed         | 2010/May/15 16:47:00 |
| Operator        |                      |

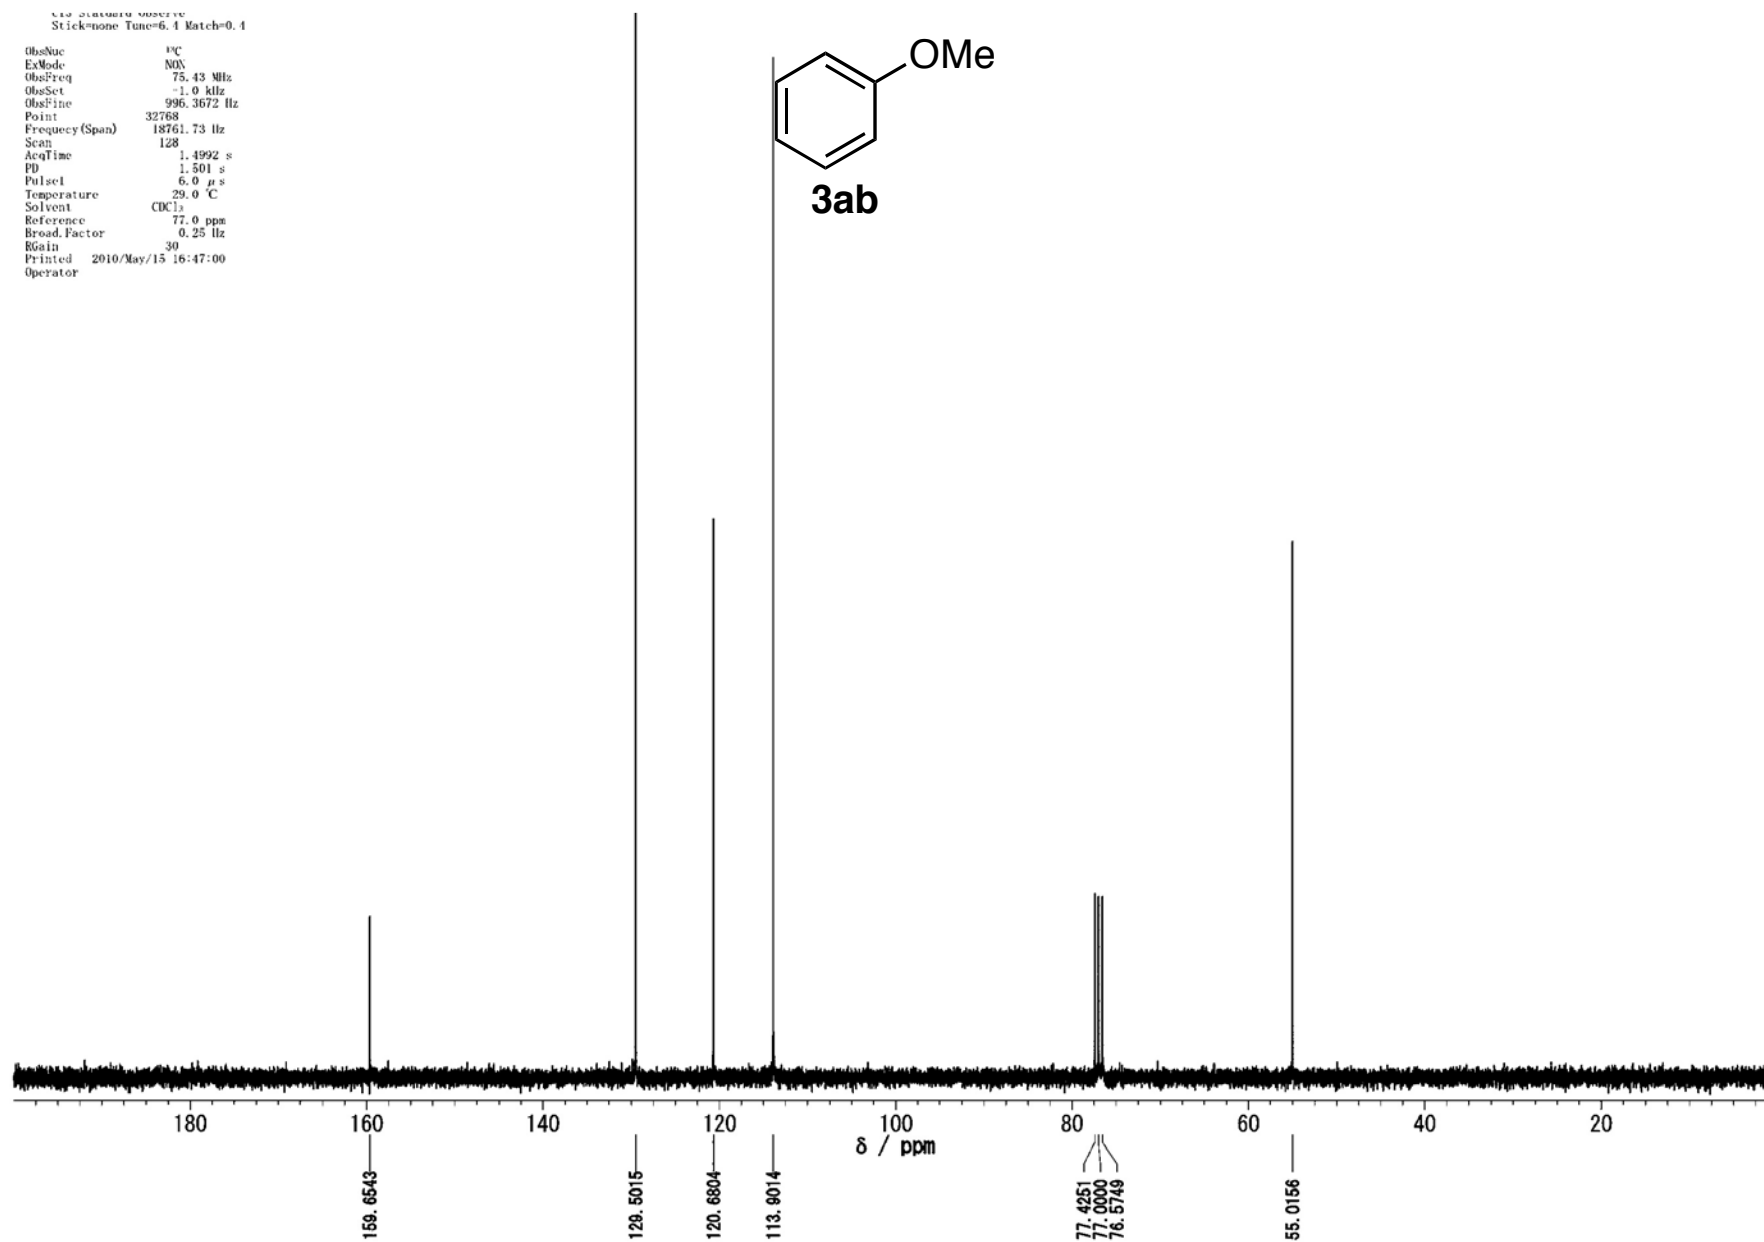

Original File:  
Date Mar 19 10  
Comment  
STANDARD 1H OBSERVE

ObsNuc <sup>1</sup>H  
ExMode NOX  
ObsFreq 299.96 MHz  
ObsSet 1.0 kHz  
ObsPine 995.0047 Hz  
Point 16384  
Frequency (Span) 4500.45 Hz  
Scan 16  
AcqTime 3.4983 s  
PD 1.502 s  
Pulse 6.0  $\mu$ s  
Temperature 29.0  $^{\circ}$ C  
Solvent CDCl<sub>3</sub>  
Reference 0.0 ppm  
Broad. Factor 0.1373 Hz  
RGain 19  
Printed 2010/May/16 14:05:06  
Operator

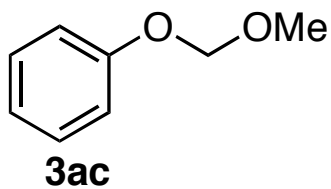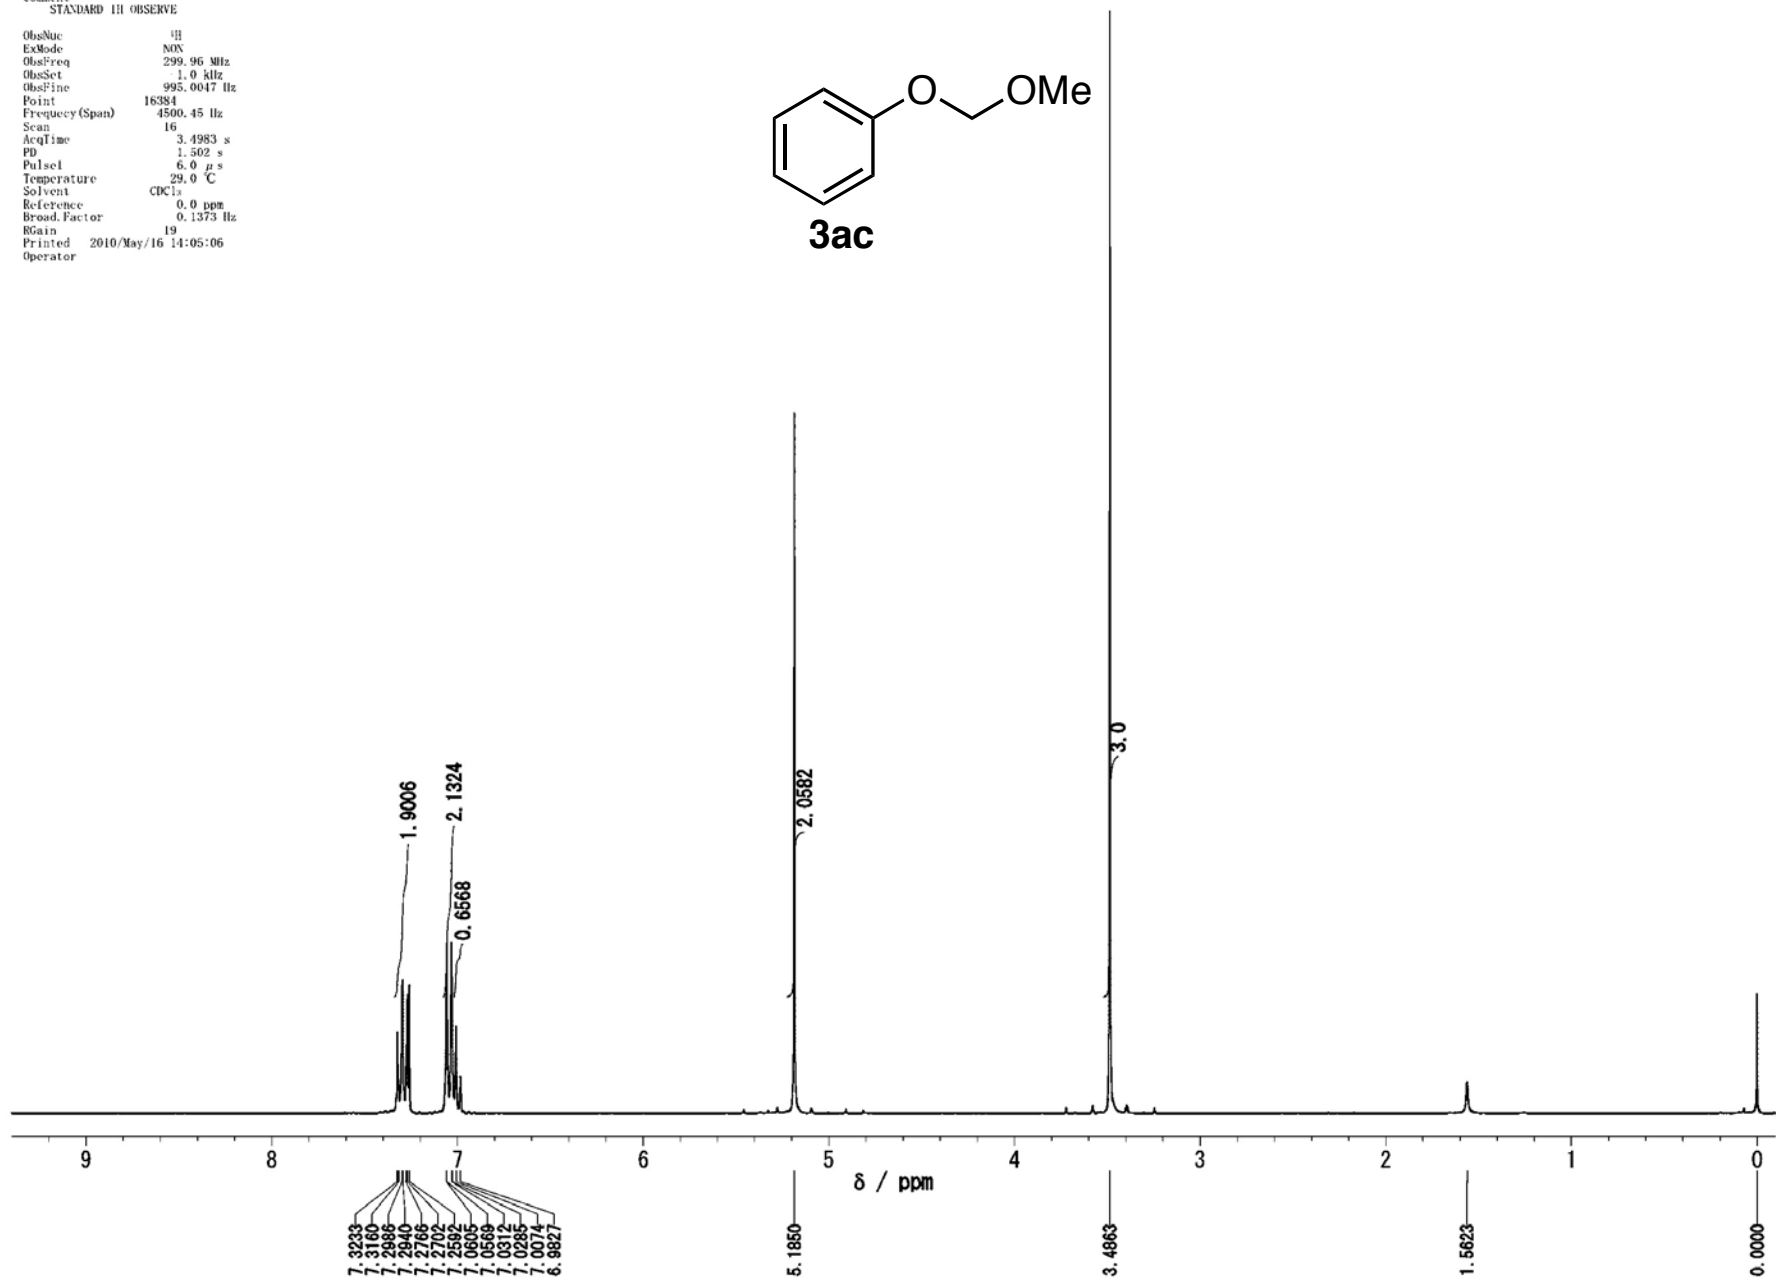



13C NMR spectrum of 3ac (CDCl<sub>3</sub>)  
 125 MHz, 29.0 °C, 1D FID FOR 3-3-13C.F1

Stick=none Tune=6.4 Match=0.4  
 ObsNuc 13C  
 ExMode NON  
 ObsFreq 75.43 MHz  
 ObsSet -1.0 kHz  
 ObsPine 996.3672 Hz  
 Point 32768  
 Frequency(Span) 18761.73 Hz  
 Scan 1408  
 AcqTime 1.4992 s  
 PD 1.501 s  
 Pulse1 6.0 μs  
 Temperature 29.0 °C  
 Solvent CDCl<sub>3</sub>  
 Reference 77.0 ppm  
 Broad.Factor 0.25 Hz  
 RGain 30  
 Printed 2010/May/16 14:02:17  
 Operator

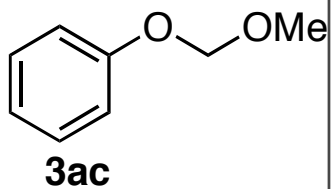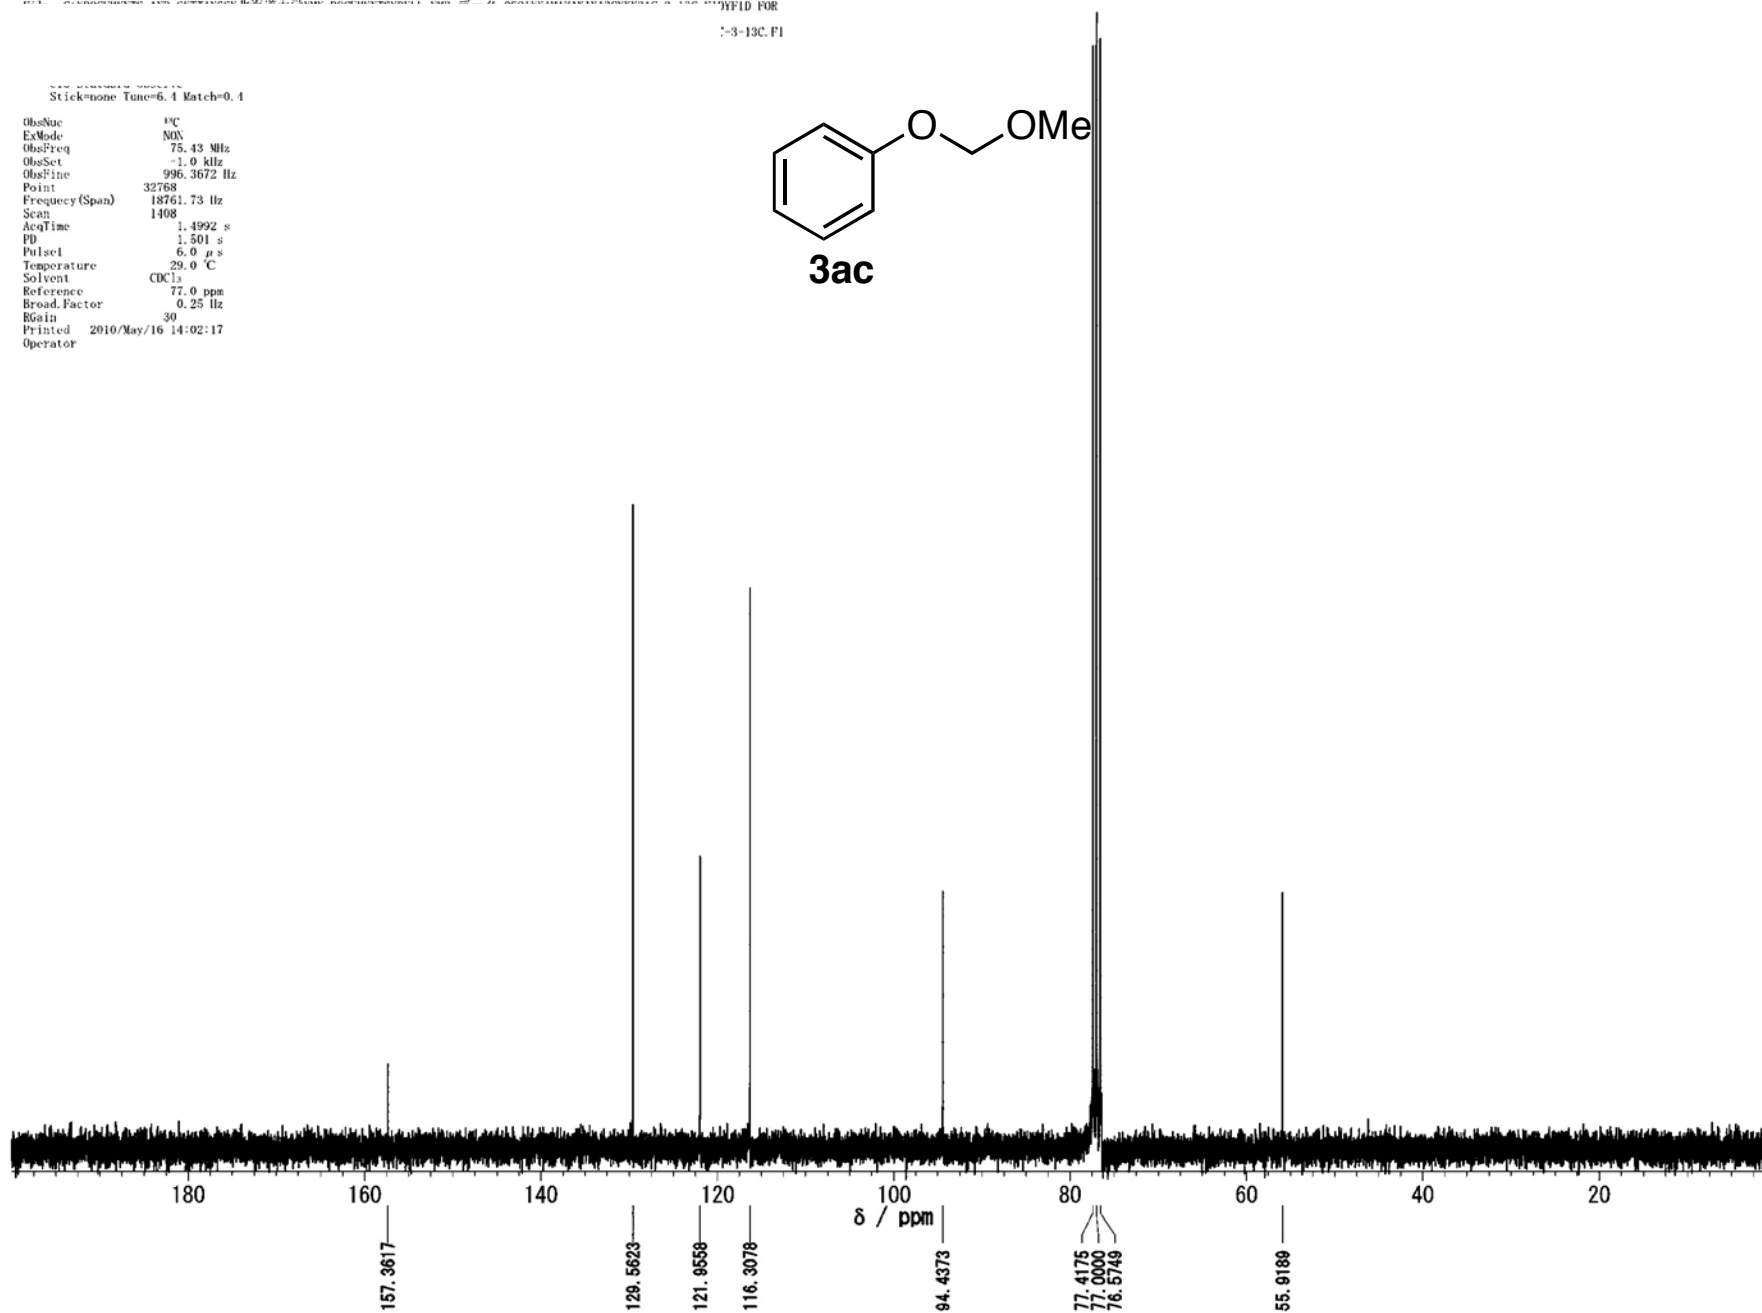

III.FIDYfid

Comment  
STANDARD 1H OBSERVE

ObsNuc <sup>1</sup>H  
ExMode NON  
ObsFreq 299.96 MHz  
ObsSet 1.0 kHz  
ObsPine 995.0047 Hz  
Point 16384  
Frequency (Span) 4500.45 Hz  
Scan 16  
AcqTime 3.4983 s  
PD 1.502 s  
Pulse 6.0  $\mu$ s  
Temperature 29.0  $^{\circ}$ C  
Solvent CDCl<sub>3</sub>  
Reference 0.0 ppm  
Broad Factor 0.25 Hz  
RGain 30  
Printed 2010/May/16 14:29:23  
Operator

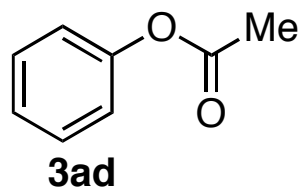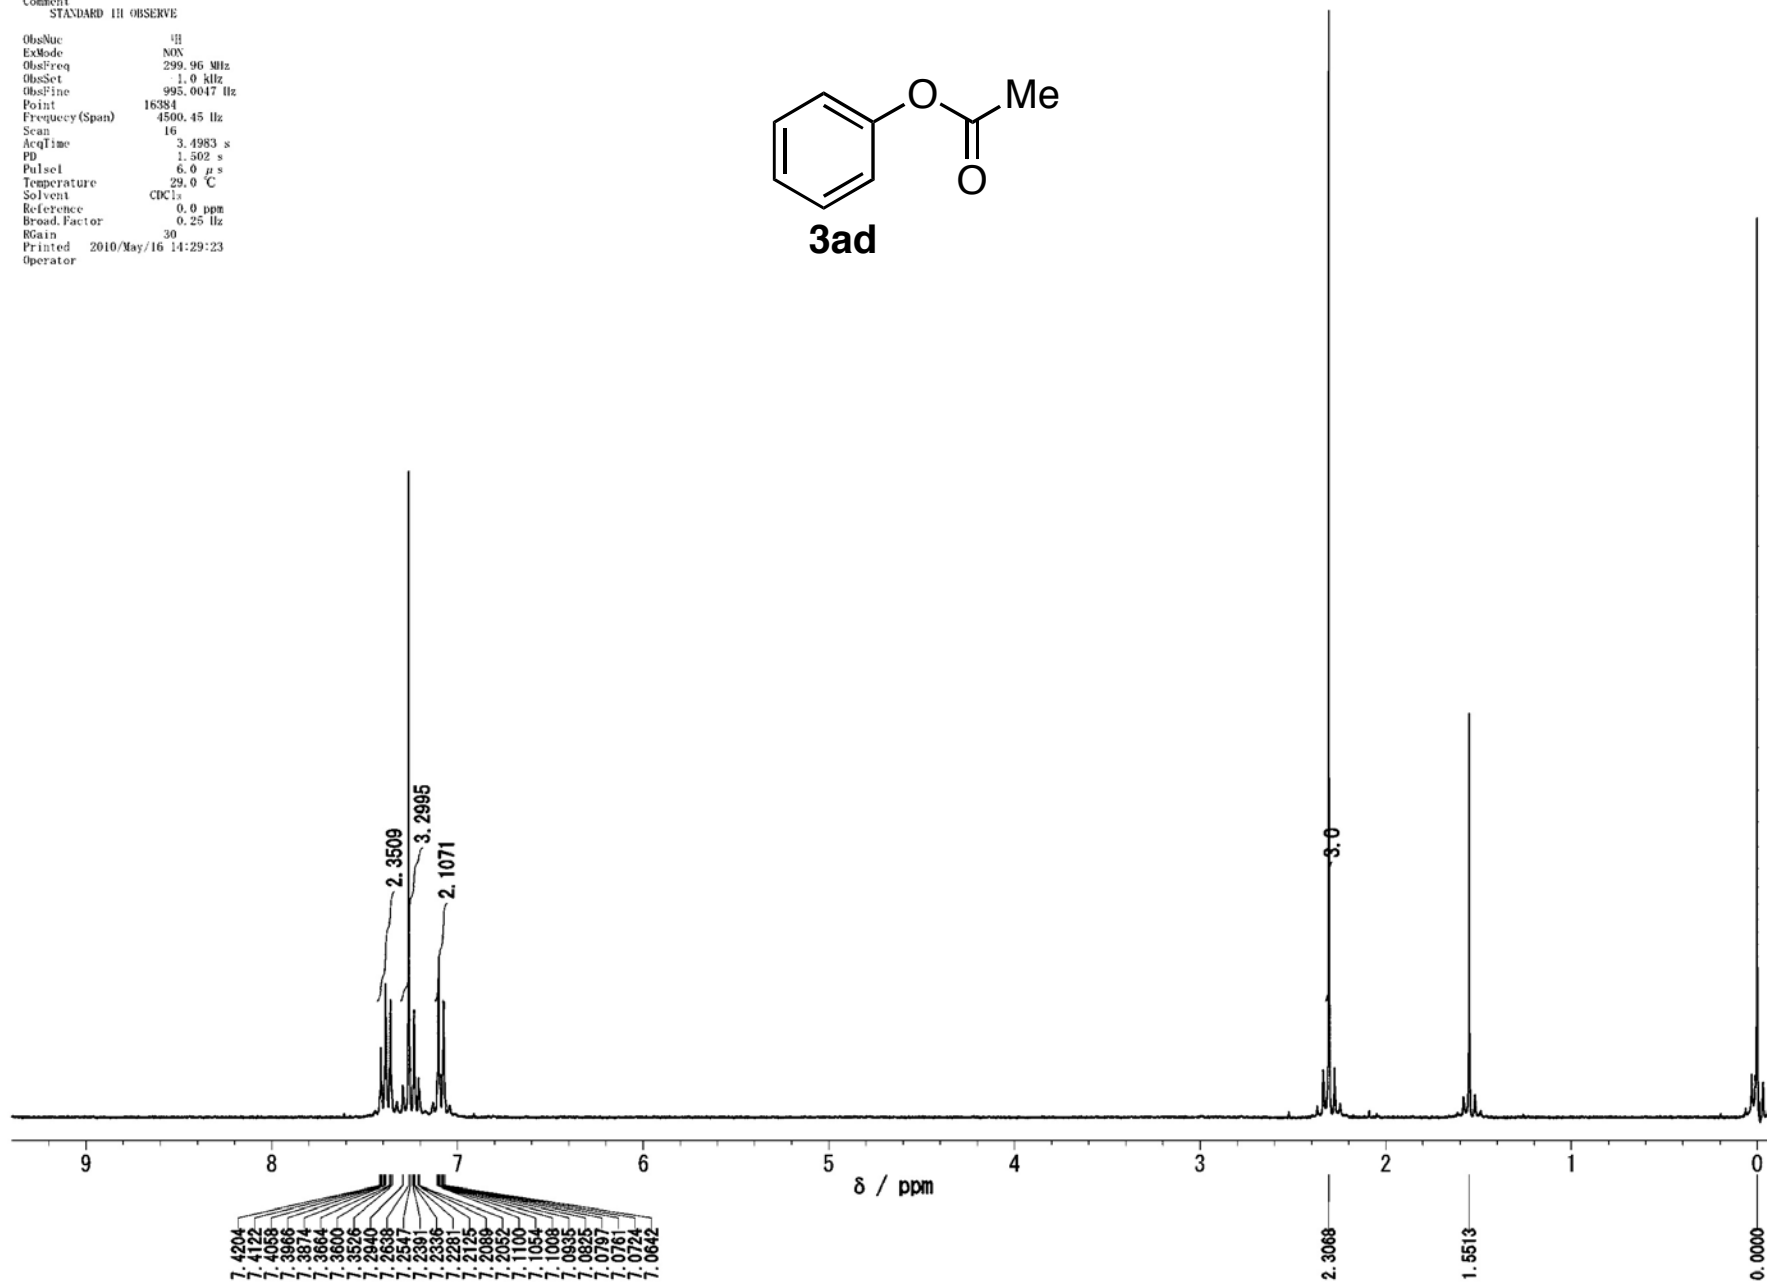

Original File: May 15 10  
 Date  
 Comment  
 C13 Standard Observe  
 Stick\*none Tune=6.4 Match=0.4

ObsNuc <sup>13</sup>C  
 ExMode NOX  
 ObsFreq 75.43 MHz  
 ObsSet -1.0 kHz  
 ObsFine 996.3672 Hz  
 Point 32768  
 Frequency (Span) 18761.73 Hz  
 Scan 128  
 AcqTime 1.4992 s  
 PD 1.501 s  
 Pulse1 6.0  $\mu$ s  
 Temperature 29.0  $^{\circ}$ C  
 Solvent CDCl<sub>3</sub>  
 Reference 77.0 ppm  
 Broad.Factor 0.2863 Hz  
 RGain 30  
 Printed 2010/May/16 14:11:11  
 Operator

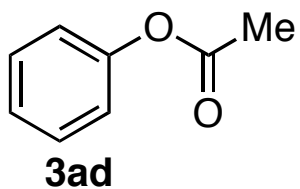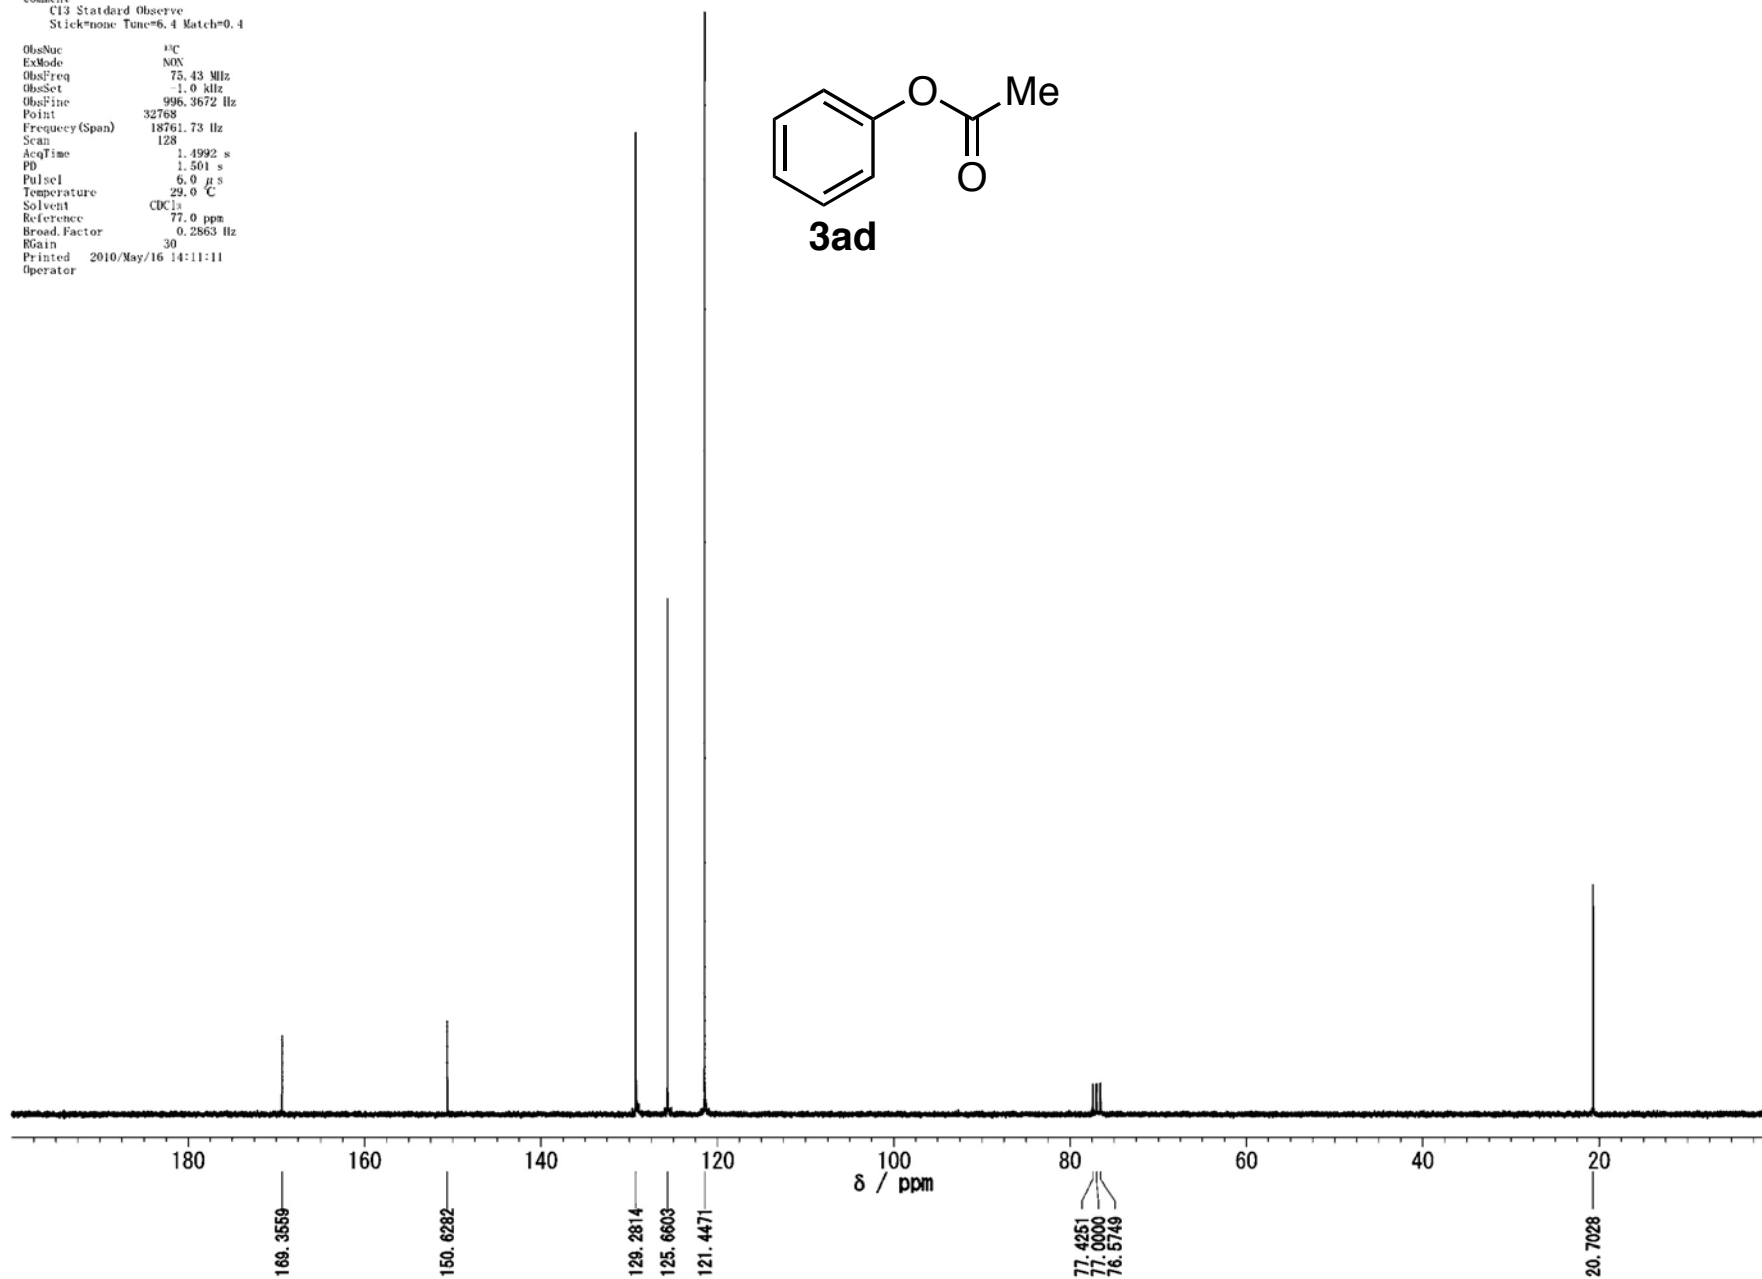

13AE 1H.FIDVfid

ObsNuc 1H  
ExMode NOX  
ObsFreq 299.96 MHz  
ObsSet 1.0 kHz  
ObsPine 995.0047 Hz  
Point 16384  
Frequency (Span) 4500.45 Hz  
Scan 16  
AcqTime 3.4983 s  
PD 1.502 s  
Pulse 6.0  $\mu$ s  
Temperature 29.0  $^{\circ}$ C  
Solvent CDCl<sub>3</sub>  
Reference 0.0 ppm  
Broad. Factor 0.25 Hz  
RGain 5  
Printed 2010/May/16 14:21:50  
Operator

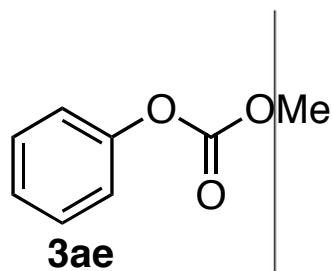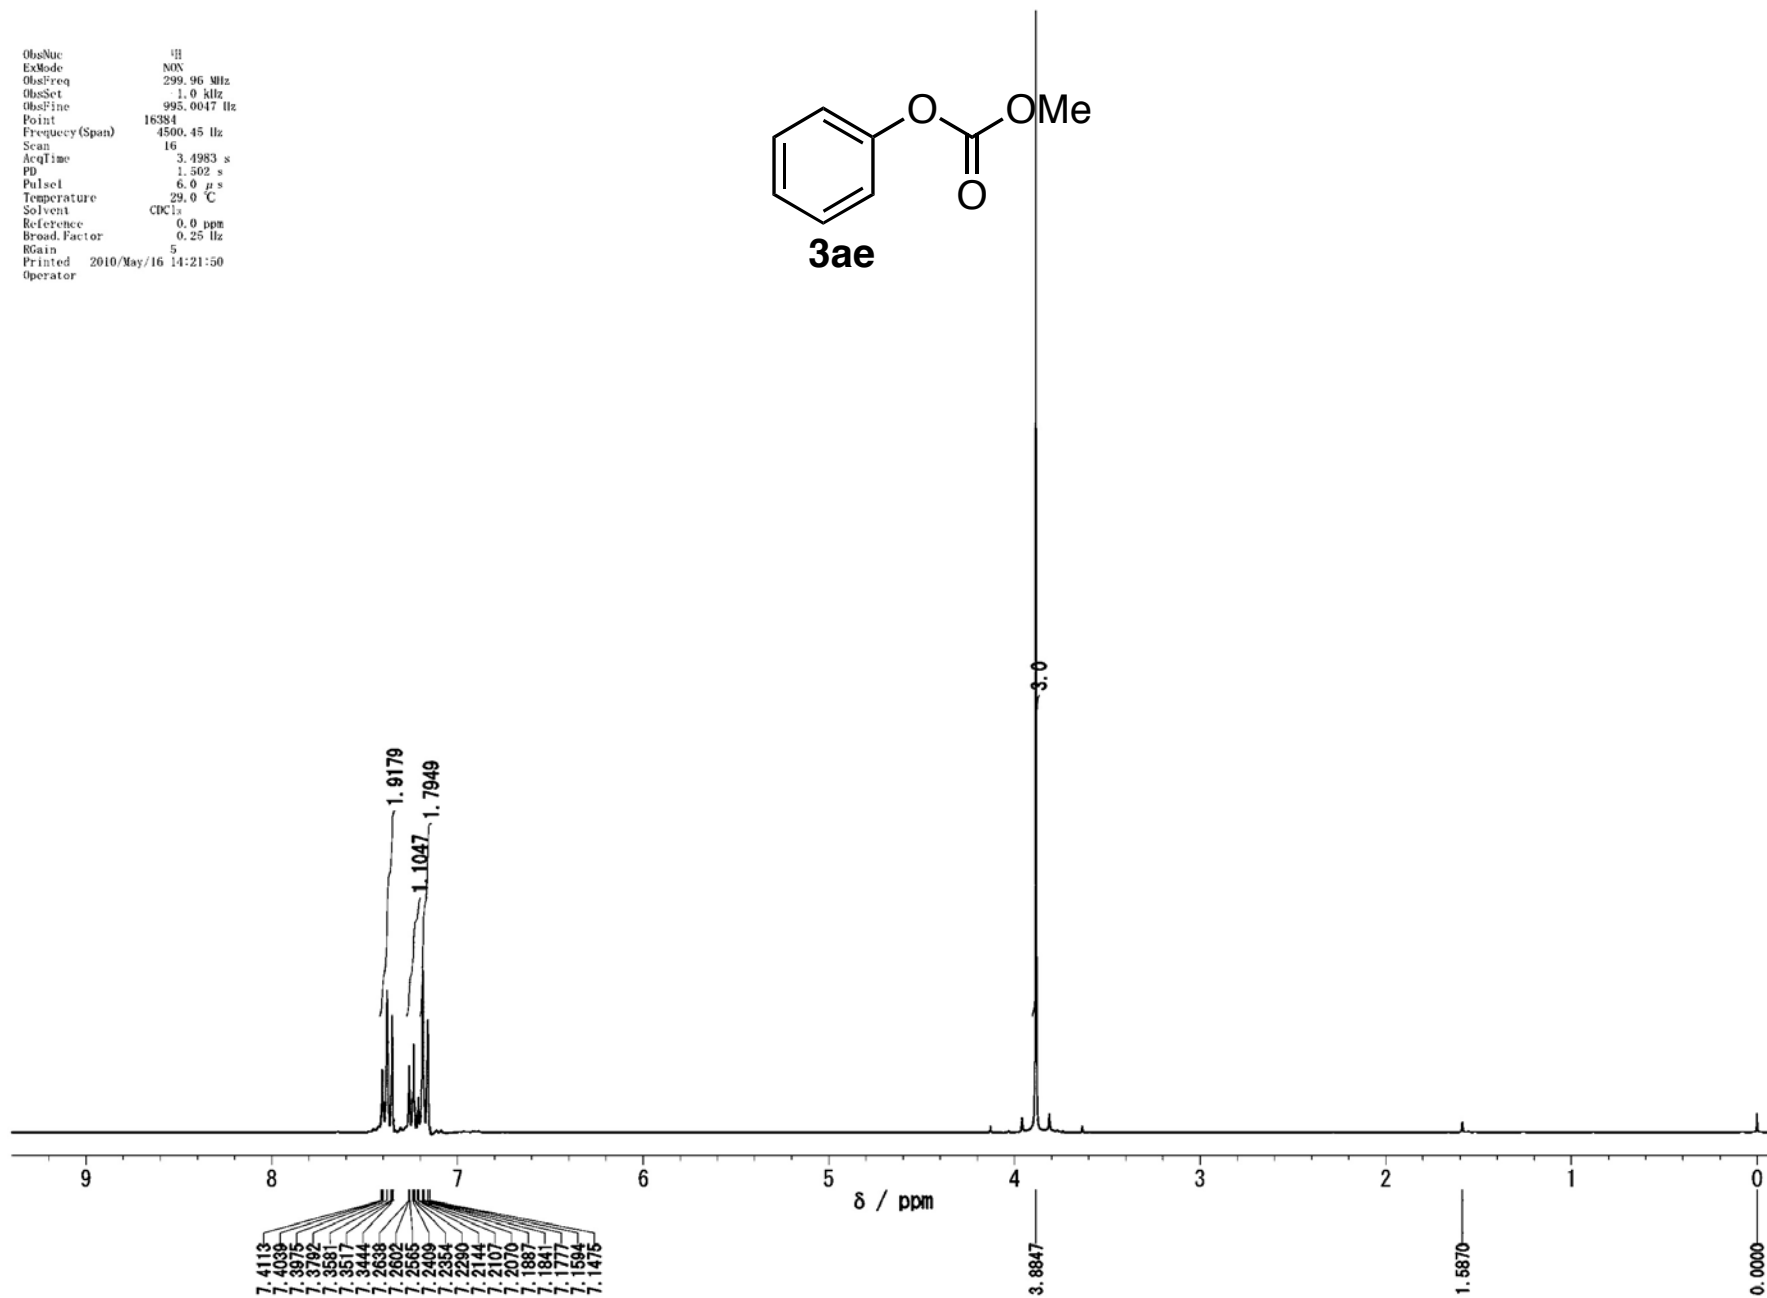

Original File:  
 Date May 15 10  
 Comment  
 C13 Standard Observe  
 Stick\*none Tune=6.4 Match=0.4

ObsNuc  $^{13}\text{C}$   
 ExMode NOX  
 ObsFreq 75.43 MHz  
 ObsSet -1.0 kHz  
 ObsFine 996.3672 Hz  
 Point 32768  
 Frequency (Span) 18761.73 Hz  
 Scan 128  
 AcqTime 1.4992 s  
 PD 1.501 s  
 Pulse1 6.0  $\mu\text{s}$   
 Temperature 29.0  $^{\circ}\text{C}$   
 Solvent  $\text{CDCl}_3$   
 Reference 77.0 ppm  
 Broad.Factor 0.2863 Hz  
 RGain 30  
 Printed 2010/May/16 14:32:09  
 Operator

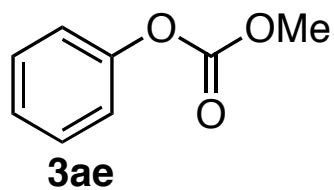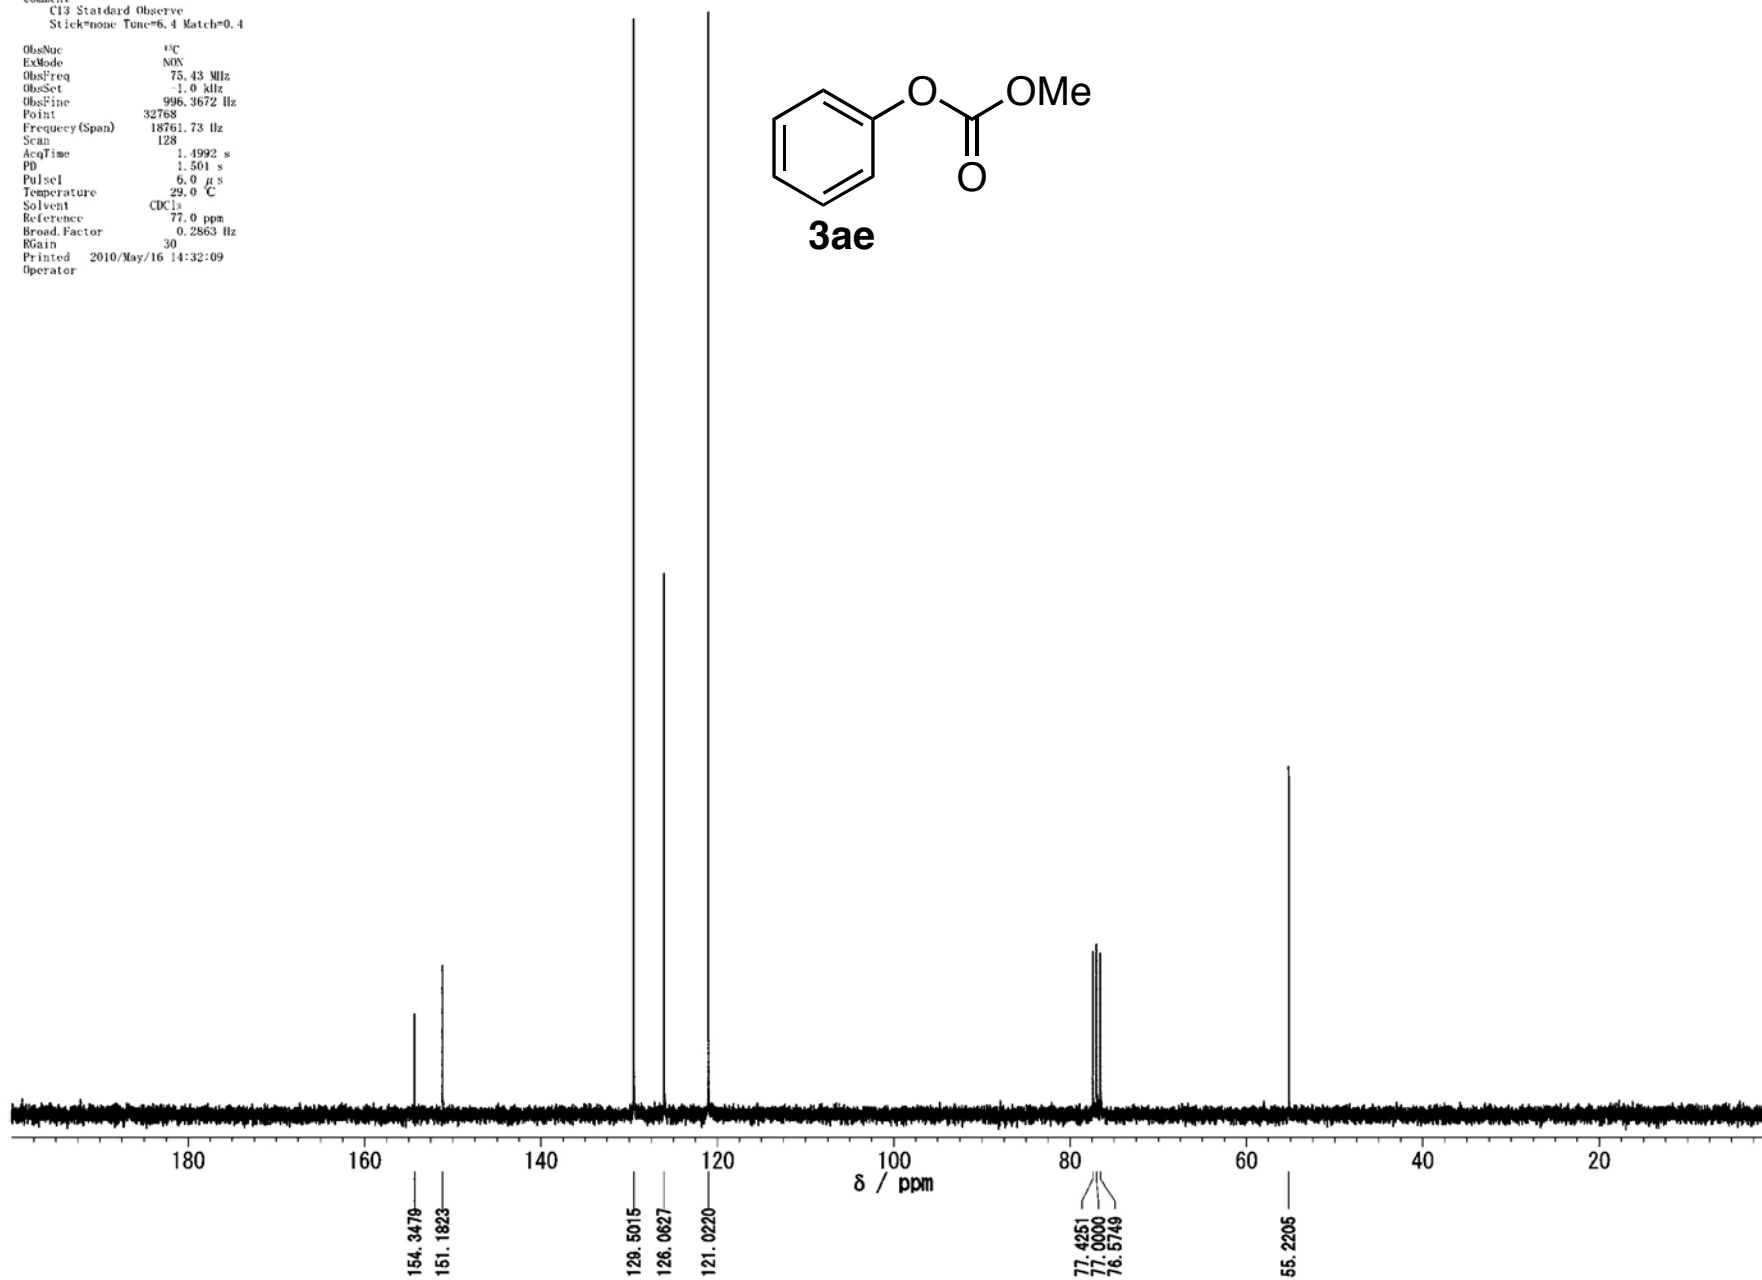

III.FIDYfid

Comment  
STANDARD 1H OBSERVE

ObsNuc <sup>1</sup>H  
ExMode NON  
ObsFreq 299.96 MHz  
ObsSet 1.0 kHz  
ObsPine 995.0047 Hz  
Point 16384  
Frequency (Span) 4500.45 Hz  
Scan 16  
AcqTime 3.4983 s  
PD 1.502 s  
Pulse 6.0  $\mu$ s  
Temperature 29.0  $^{\circ}$ C  
Solvent CDCl<sub>3</sub>  
Reference 0.0 ppm  
Broad Factor 0.25 Hz  
RGain 20  
Printed 2010/May/16 14:38:38  
Operator

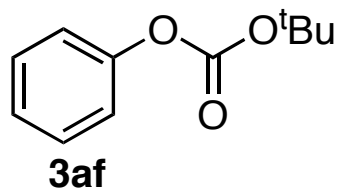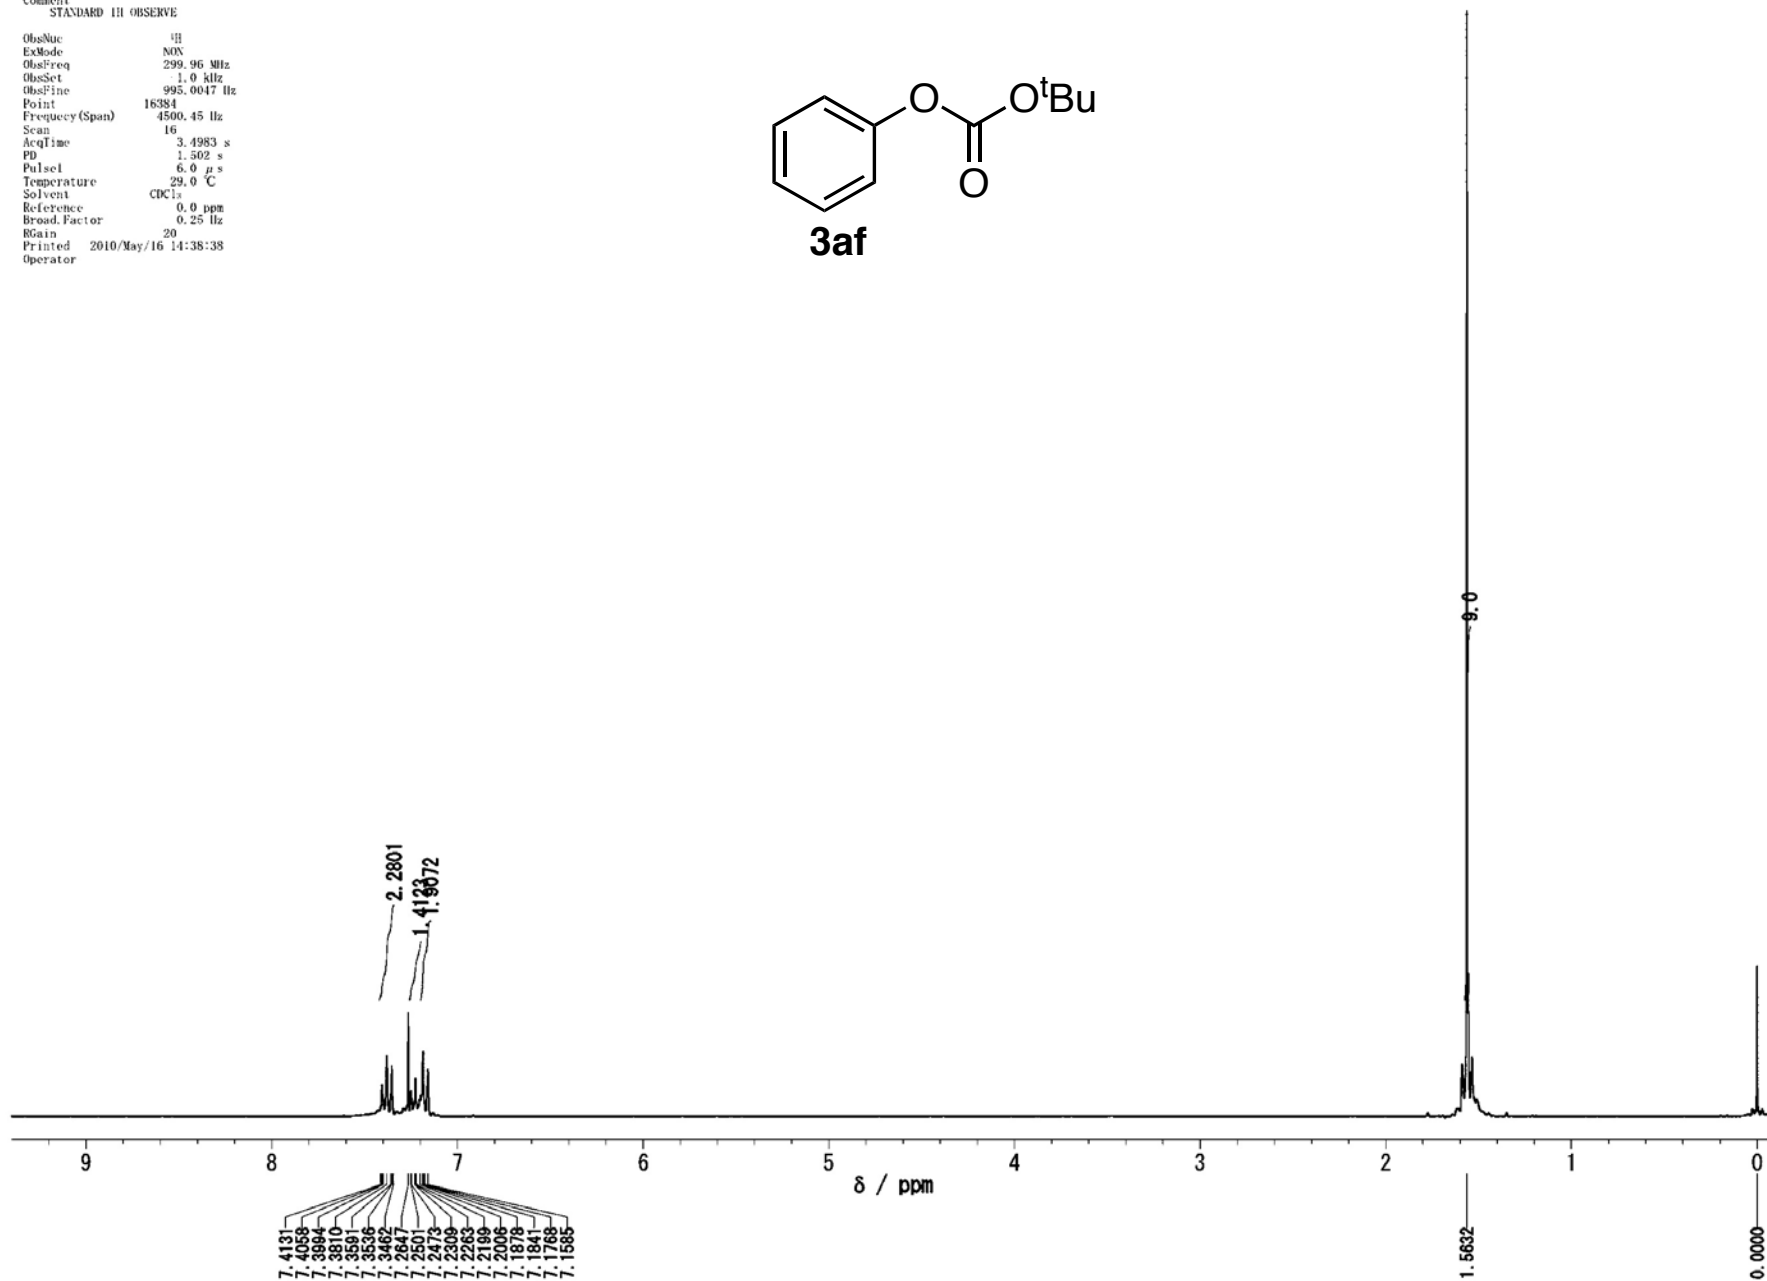

Original File: May 15 10  
 Date: May 15 10  
 Comment: C13 Standard Observe  
 Stick\*none Tune=6.4 Match=0.4

ObsNuc: <sup>13</sup>C  
 ExMode: NOX  
 ObsFreq: 75.43 MHz  
 ObsSet: 1.0 kHz  
 ObsFine: 996.3672 Hz  
 Point: 32768  
 Frequency (Span): 18761.73 Hz  
 Scan: 64  
 AcqTime: 1.4992 s  
 PD: 1.501 s  
 Pulse1: 6.0 μs  
 Temperature: 29.0 °C  
 Solvent: CDCl<sub>3</sub>  
 Reference: 77.0 ppm  
 Broad\_Factor: 0.2863 Hz  
 RGain: 30  
 Printed: 2010/May/16 14:40:55  
 Operator:

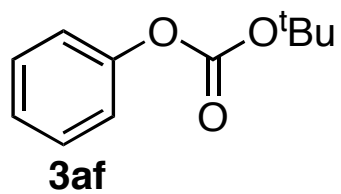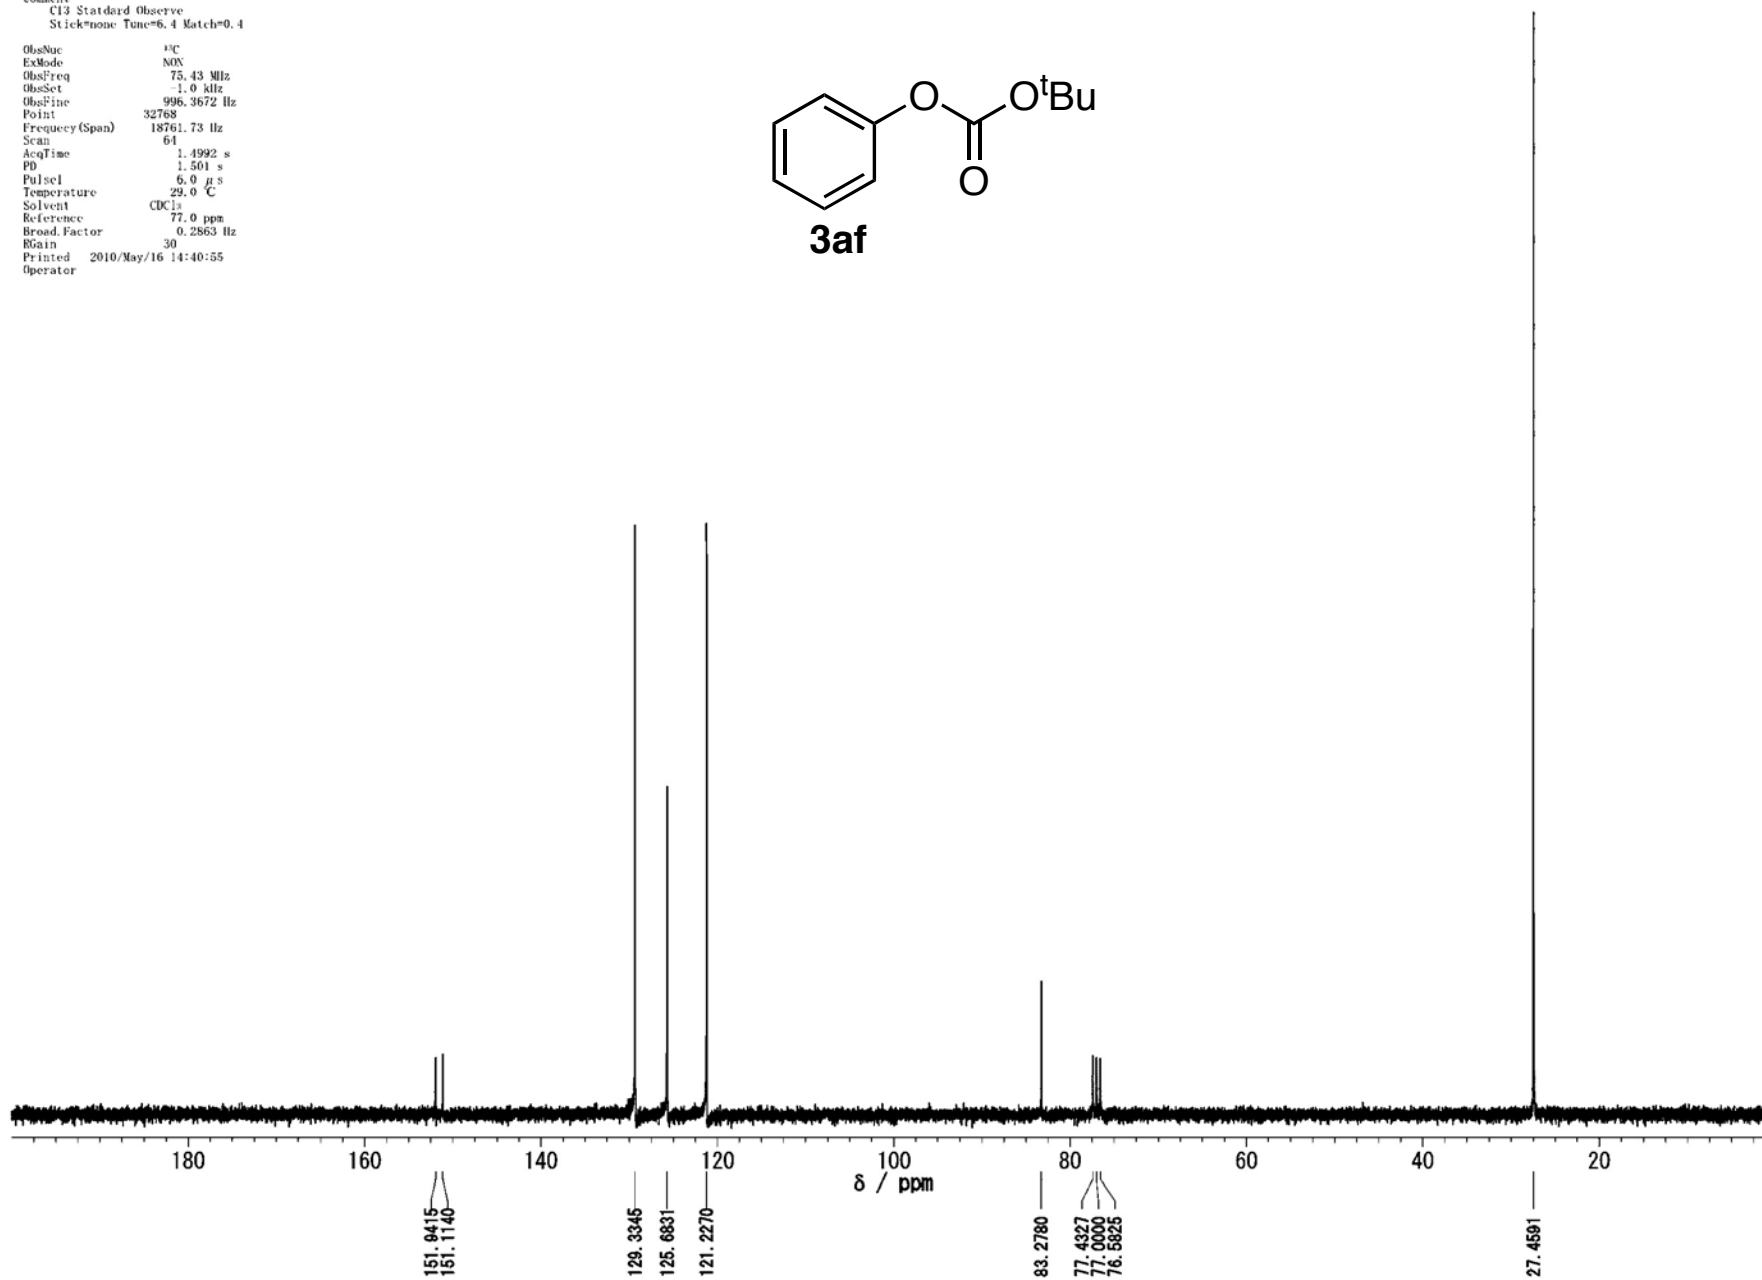

Original File:   
 Date: Jun 2 09   
 Comment: STANDARD 1H OBSERVE

ObsNuc: <sup>1</sup>H   
 ExMode: NOX   
 ObsFreq: 299.96 MHz   
 ObsSet: 1.0 kHz   
 ObsPine: 995.0047 Hz   
 Point: 16384   
 Frequency (Span): 4500.45 Hz   
 Scan: 16   
 AcqTime: 3.4983 s   
 PD: 1.502 s   
 Pulse: 6.0 μs   
 Temperature: 29.0 °C   
 Solvent: CDCl<sub>3</sub>   
 Reference: 0.0 ppm   
 Broad. Factor: 0.1373 Hz   
 RGain: 14   
 Printed: 2010/May/16 14:46:04   
 Operator:

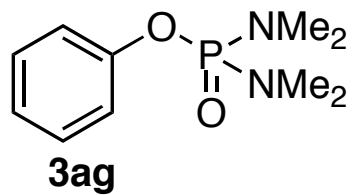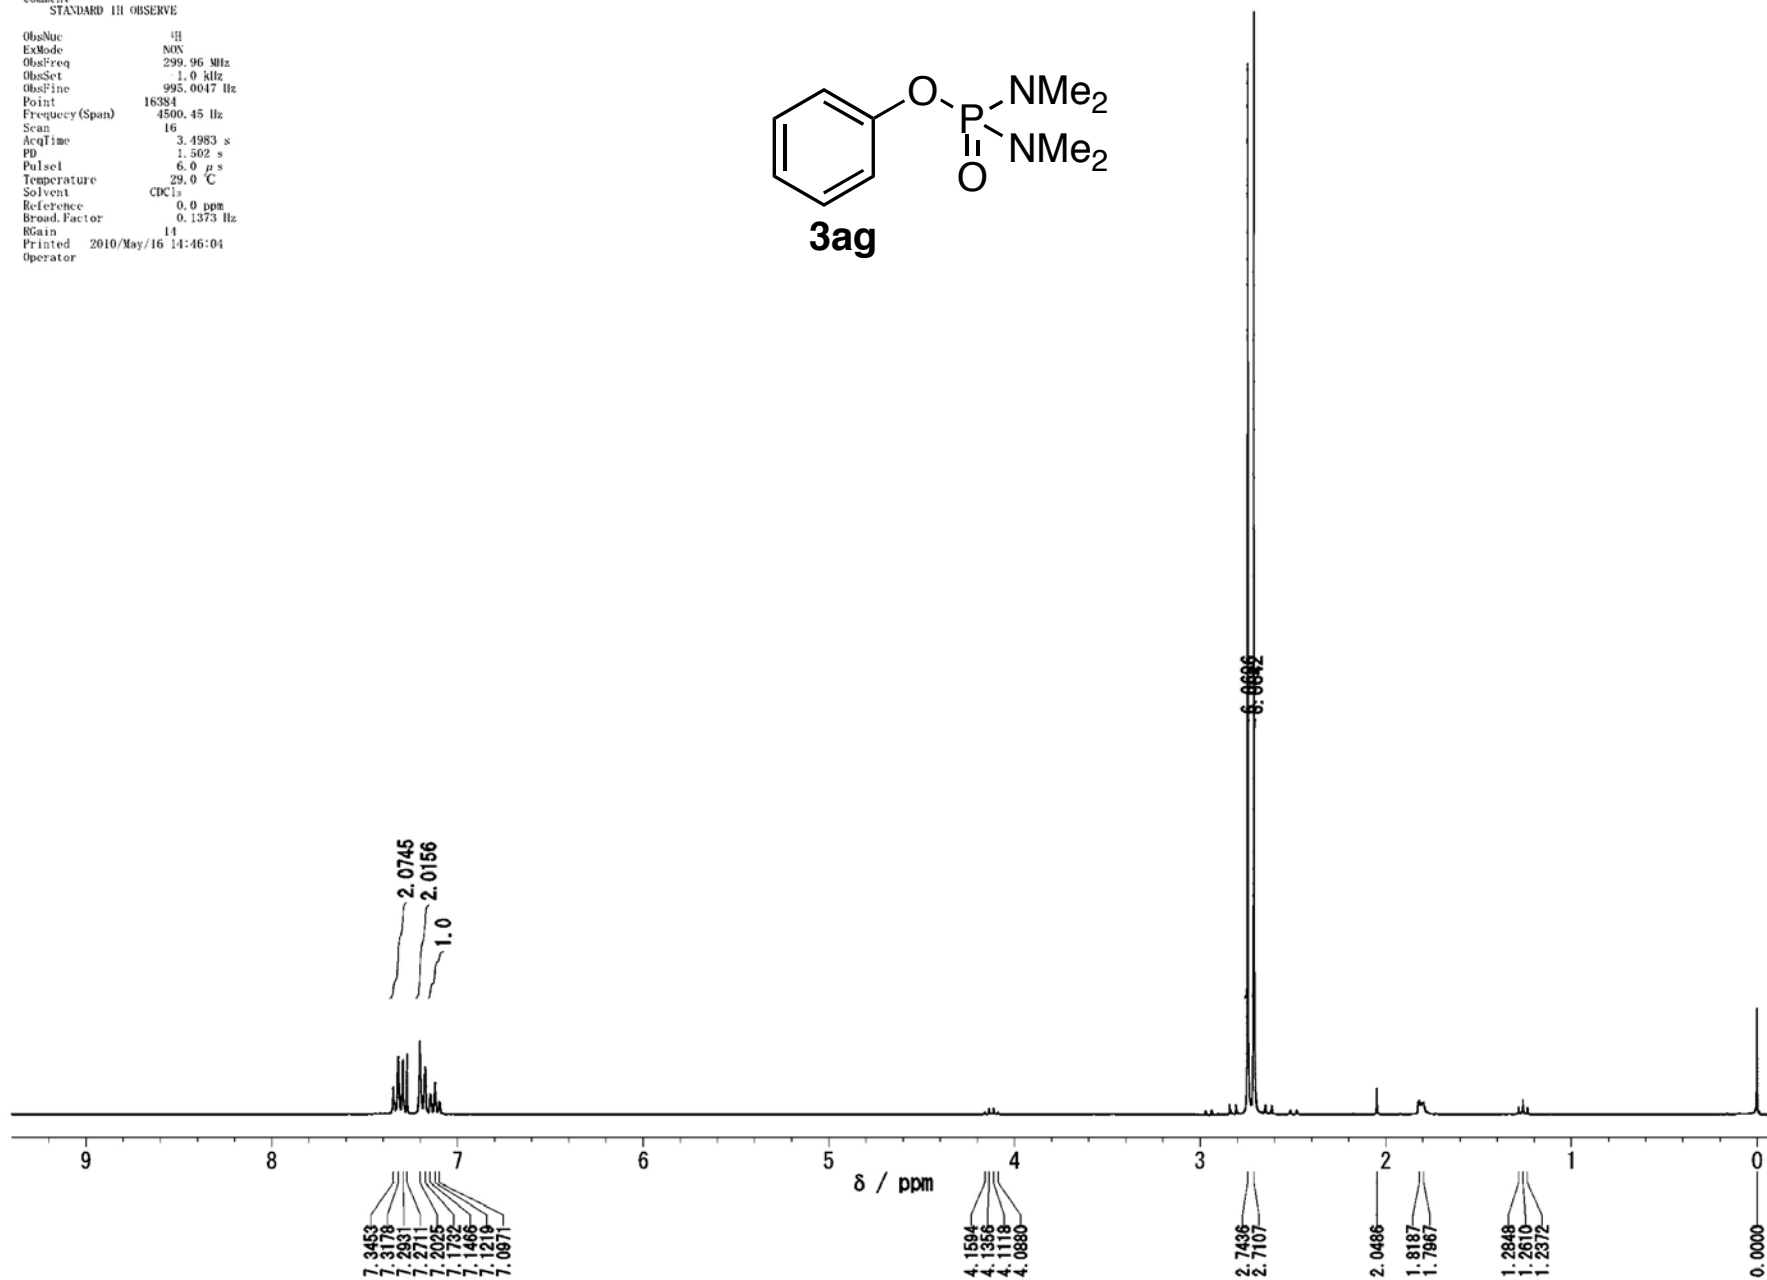



NAME: 3ag  
ExMode: NMR  
ObsFreq: 75.43 MHz  
ObsSet: -1.0 kHz  
ObsFine: 996.3672 Hz  
Point: 32768  
Frequency (Span): 18761.73 Hz  
Scan: 128  
AcqTime: 1.4992 s  
PD: 1.501 s  
Pulse1: 6.0  $\mu$ s  
Temperature: 29.0  $^{\circ}$ C  
Solvent: CDCl<sub>3</sub>  
Reference: 77.0 ppm  
Broad.Factor: 0.2863 Hz  
RGain: 30  
Printed: 2010/May/16 14:48:14  
Operator:

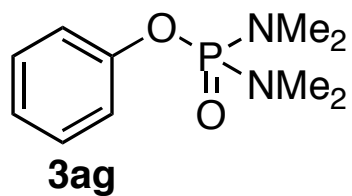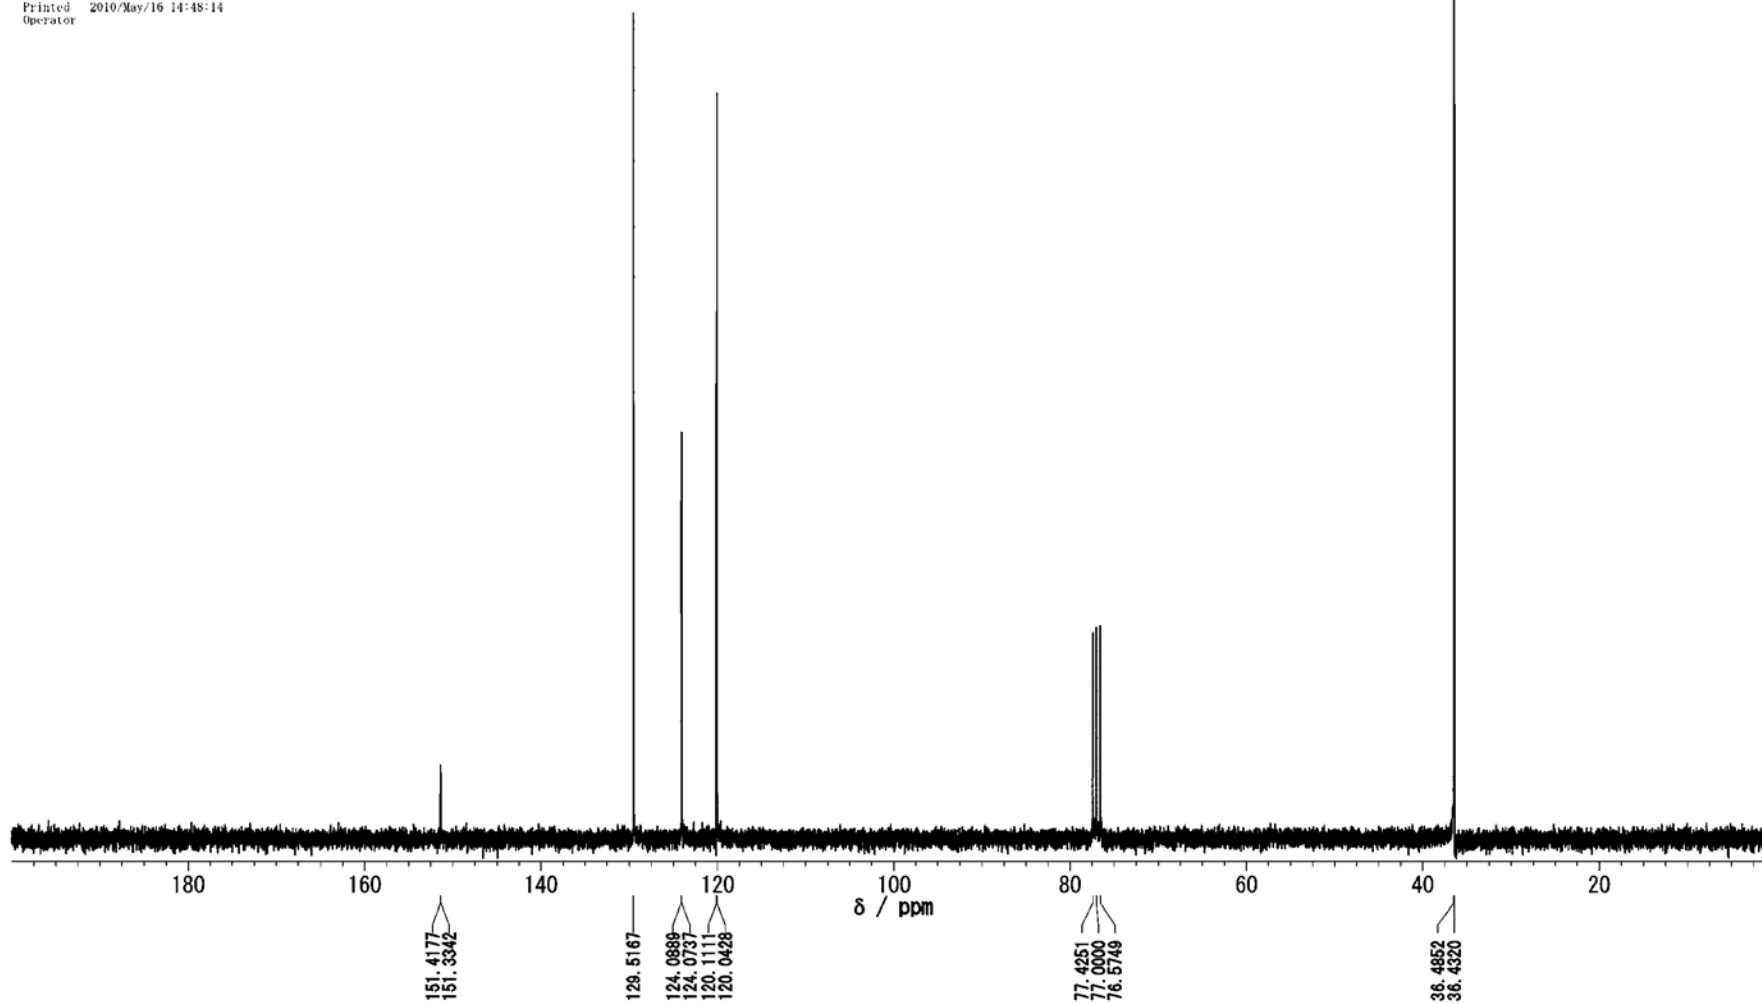

FOR PAPER A  
1H FIDVfid

COMPUTED  
STANDARD 1H OBSERVE

|                  |                      |
|------------------|----------------------|
| ObsNuc           | <sup>1</sup> H       |
| ExMode           | NMR                  |
| ObsFreq          | 299.96 MHz           |
| ObsSet           | -1.0 kHz             |
| ObsPine          | 995.0047 Hz          |
| Point            | 16384                |
| Frequency (Span) | 4500.45 Hz           |
| Scan             | 16                   |
| AcqTime          | 3.4983 s             |
| PD               | 1.502 s              |
| Pulse1           | 6.0 $\mu$ s          |
| Temperature      | 29.0 $^{\circ}$ C    |
| Solvent          | CDCl <sub>3</sub>    |
| Reference        | 0.0 ppm              |
| Broad. Factor    | 0.25 Hz              |
| RGain            | 12                   |
| Printed          | 2010/May/16 14:54:05 |
| Operator         |                      |

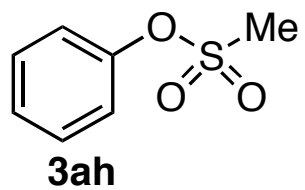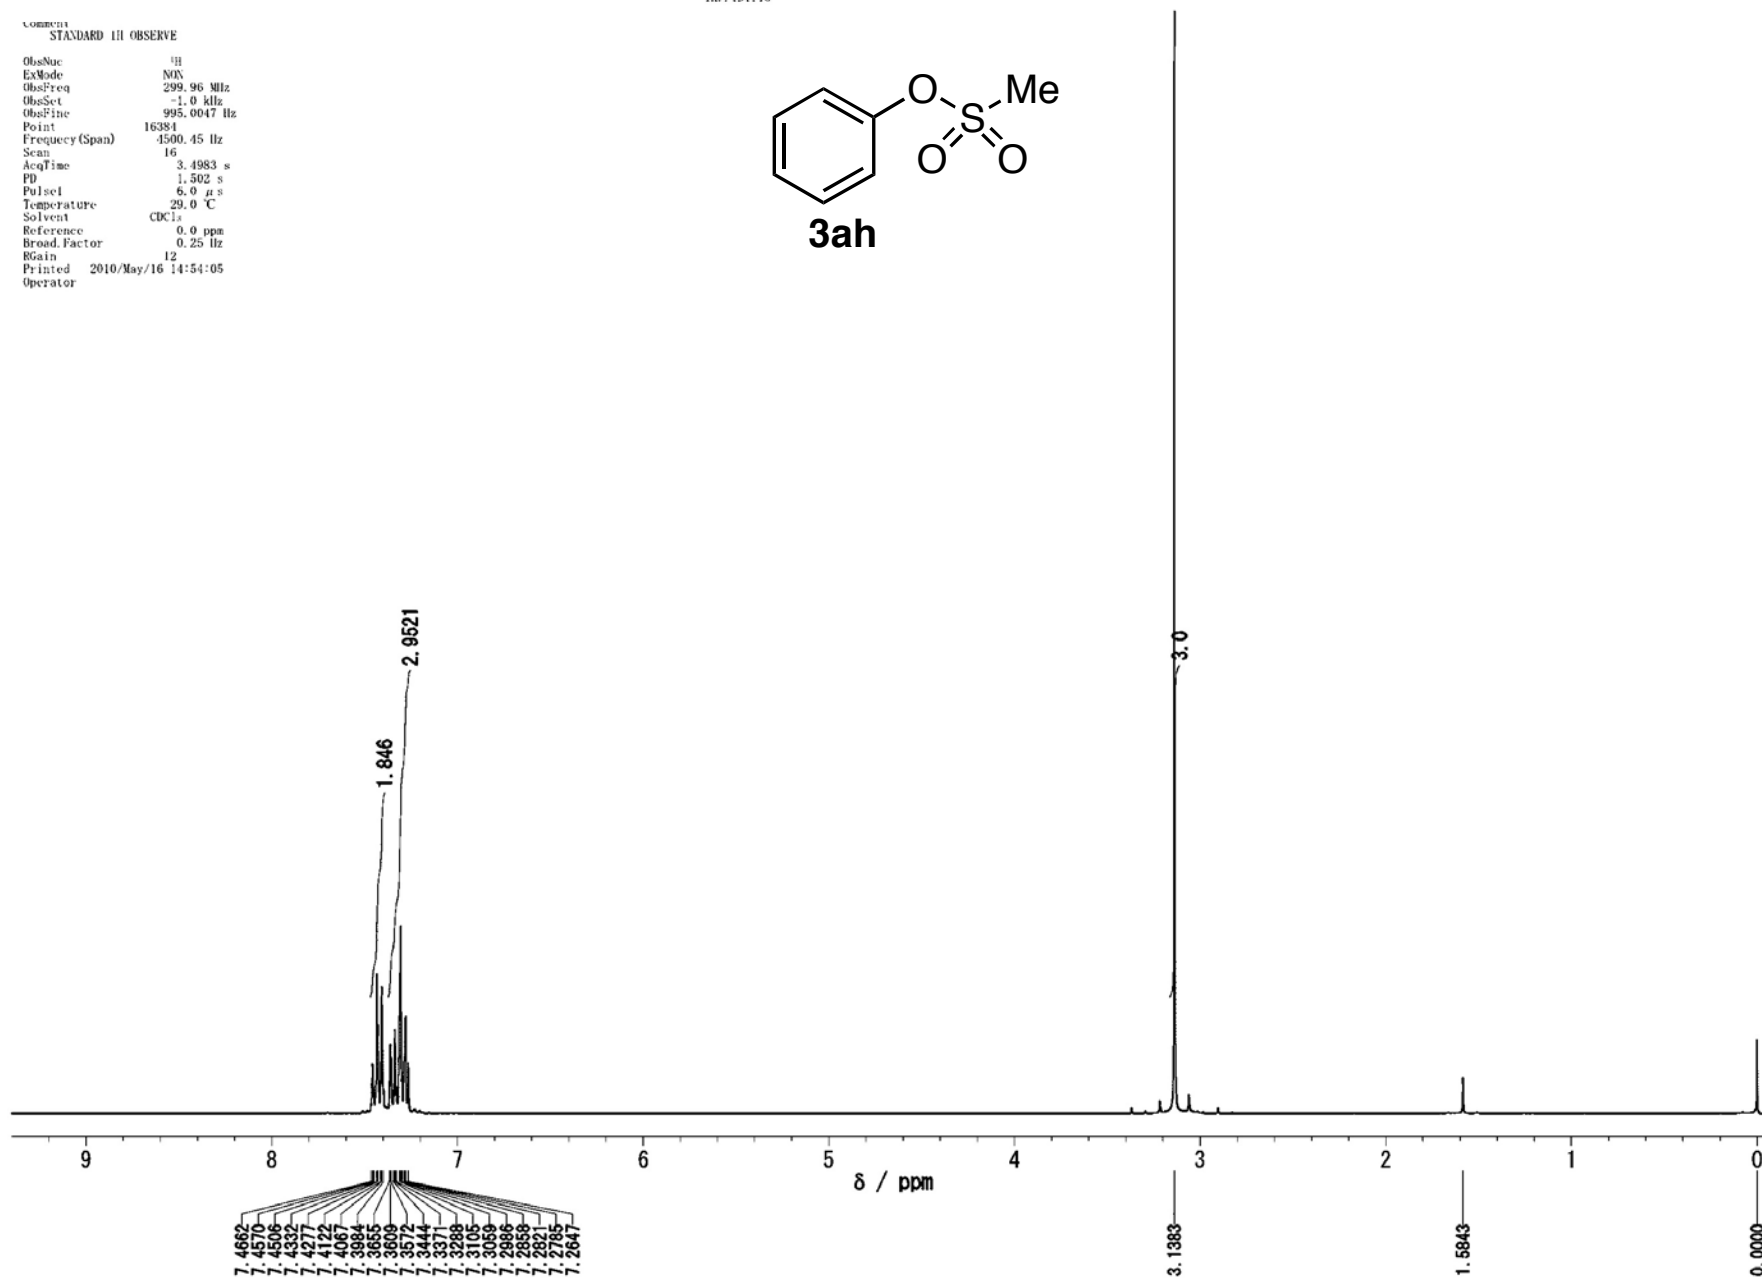

FOR PAPER.  
13C, FIDYfid

Comments  
C13 Standard Observe  
Stick=none Tune=6.4 Match=0.4

ObsNuc 13C  
ExMode NMR  
ObsFreq 75.43 MHz  
ObsSet -1.0 kHz  
ObsFine 996.3672 Hz  
Point 32768  
Frequency (Span) 18761.73 Hz  
Scan 256  
AcqTime 1.4992 s  
PD 1.501 s  
Pulse1 6.0  $\mu$ s  
Temperature 29.0  $^{\circ}$ C  
Solvent CDCl<sub>3</sub>  
Reference 77.0 ppm  
Broad.Factor 0.25 Hz  
RGain 30  
Printed 2010/May/16 14:56:53  
Operator

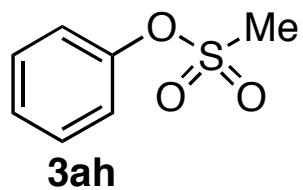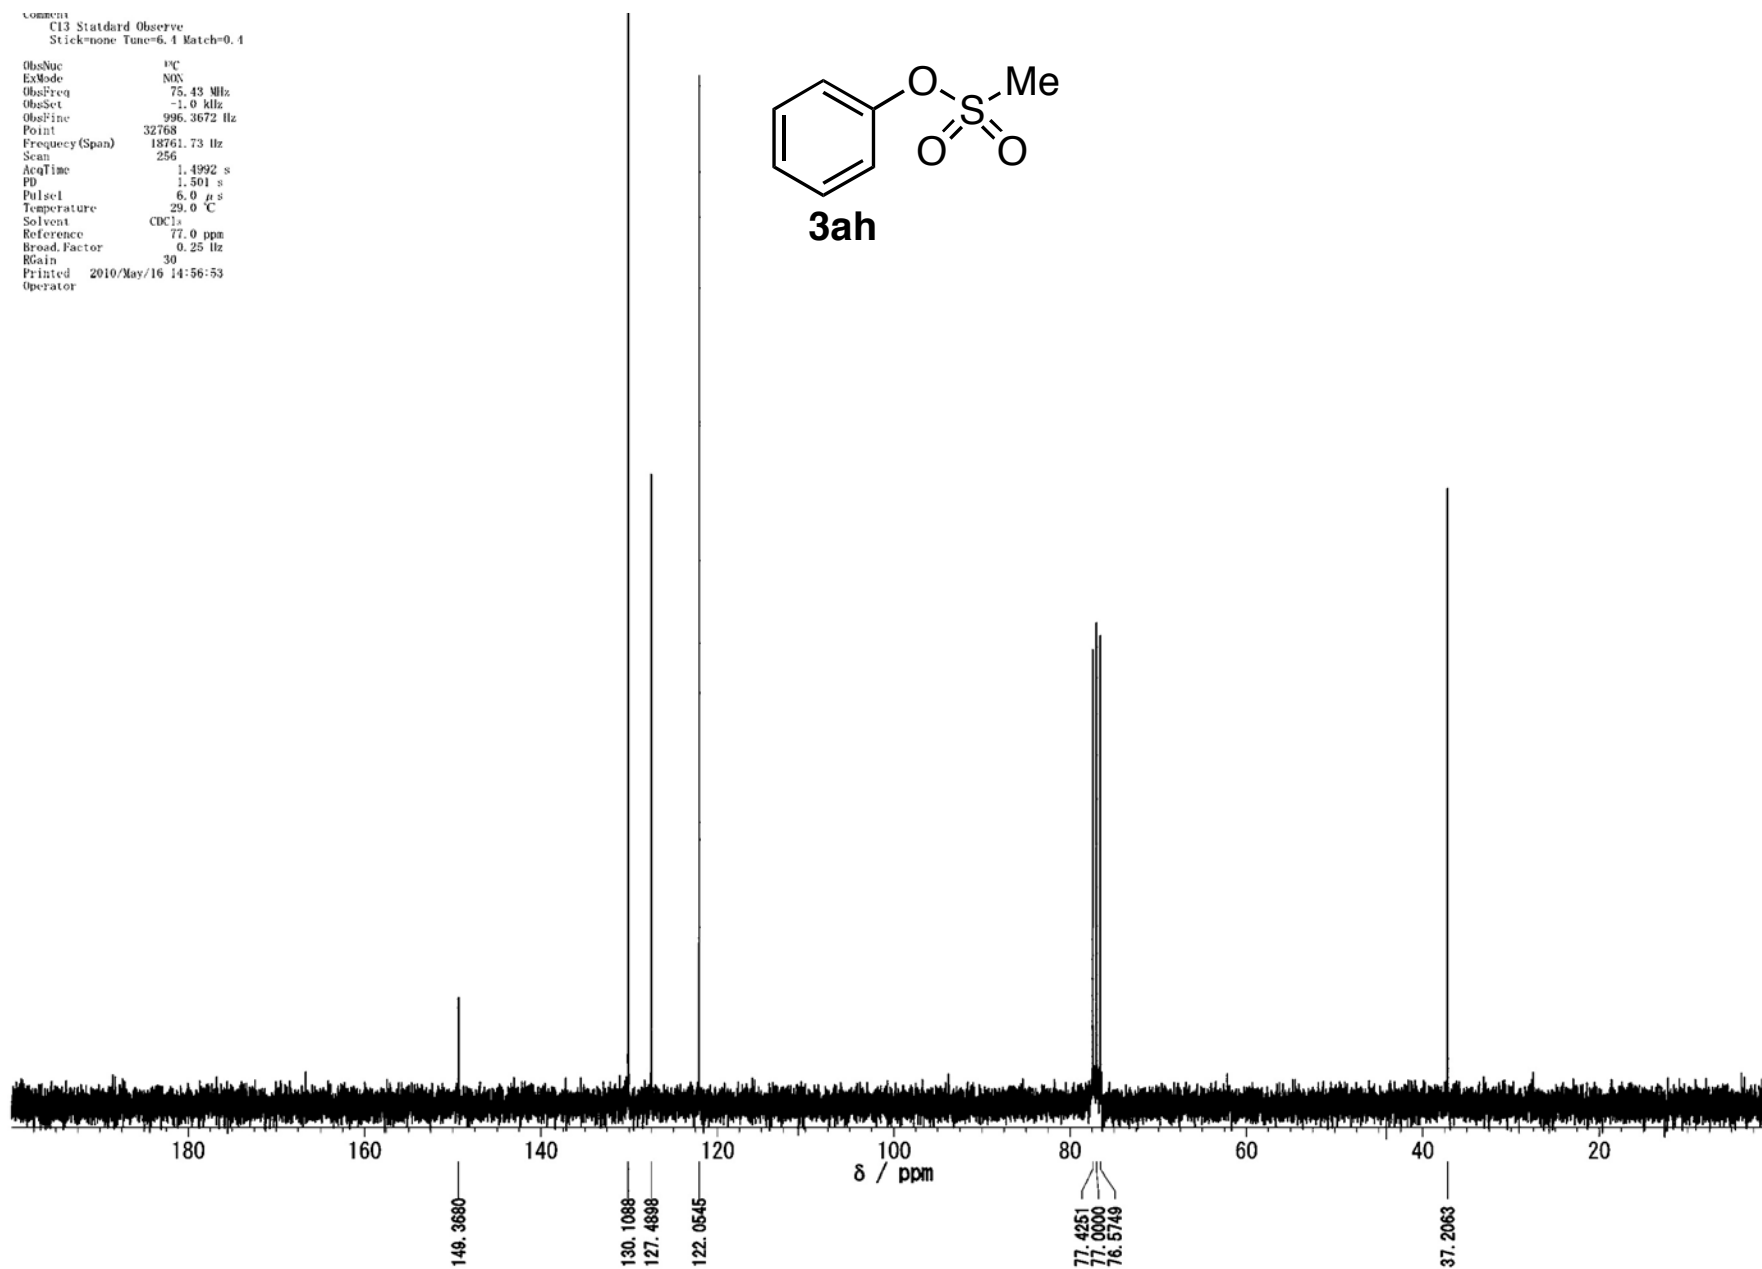

D FOR PAPER.  
-HIL FIDYfid

COMBOS  
STANDARD III OBSERVE

|                  |                      |
|------------------|----------------------|
| ObsNuc           | <sup>1</sup> H       |
| ExMode           | NOV                  |
| ObsFreq          | 299.96 MHz           |
| ObsSet           | -1.0 kHz             |
| ObsFine          | 995.0047 Hz          |
| Point            | 16384                |
| Frequency (Span) | 4500.45 Hz           |
| Scan             | 16                   |
| AcqTime          | 3.4983 s             |
| PD               | 1.502 s              |
| Pulse1           | 6.0 $\mu$ s          |
| Temperature      | 29.0 $^{\circ}$ C    |
| Solvent          | CDCl <sub>3</sub>    |
| Reference        | 0.0 ppm              |
| Broad. Factor    | 0.25 Hz              |
| RGain            | 24                   |
| Printed          | 2010/May/14 16:22:04 |
| Operator         |                      |

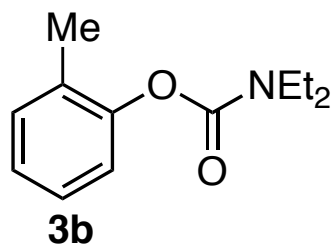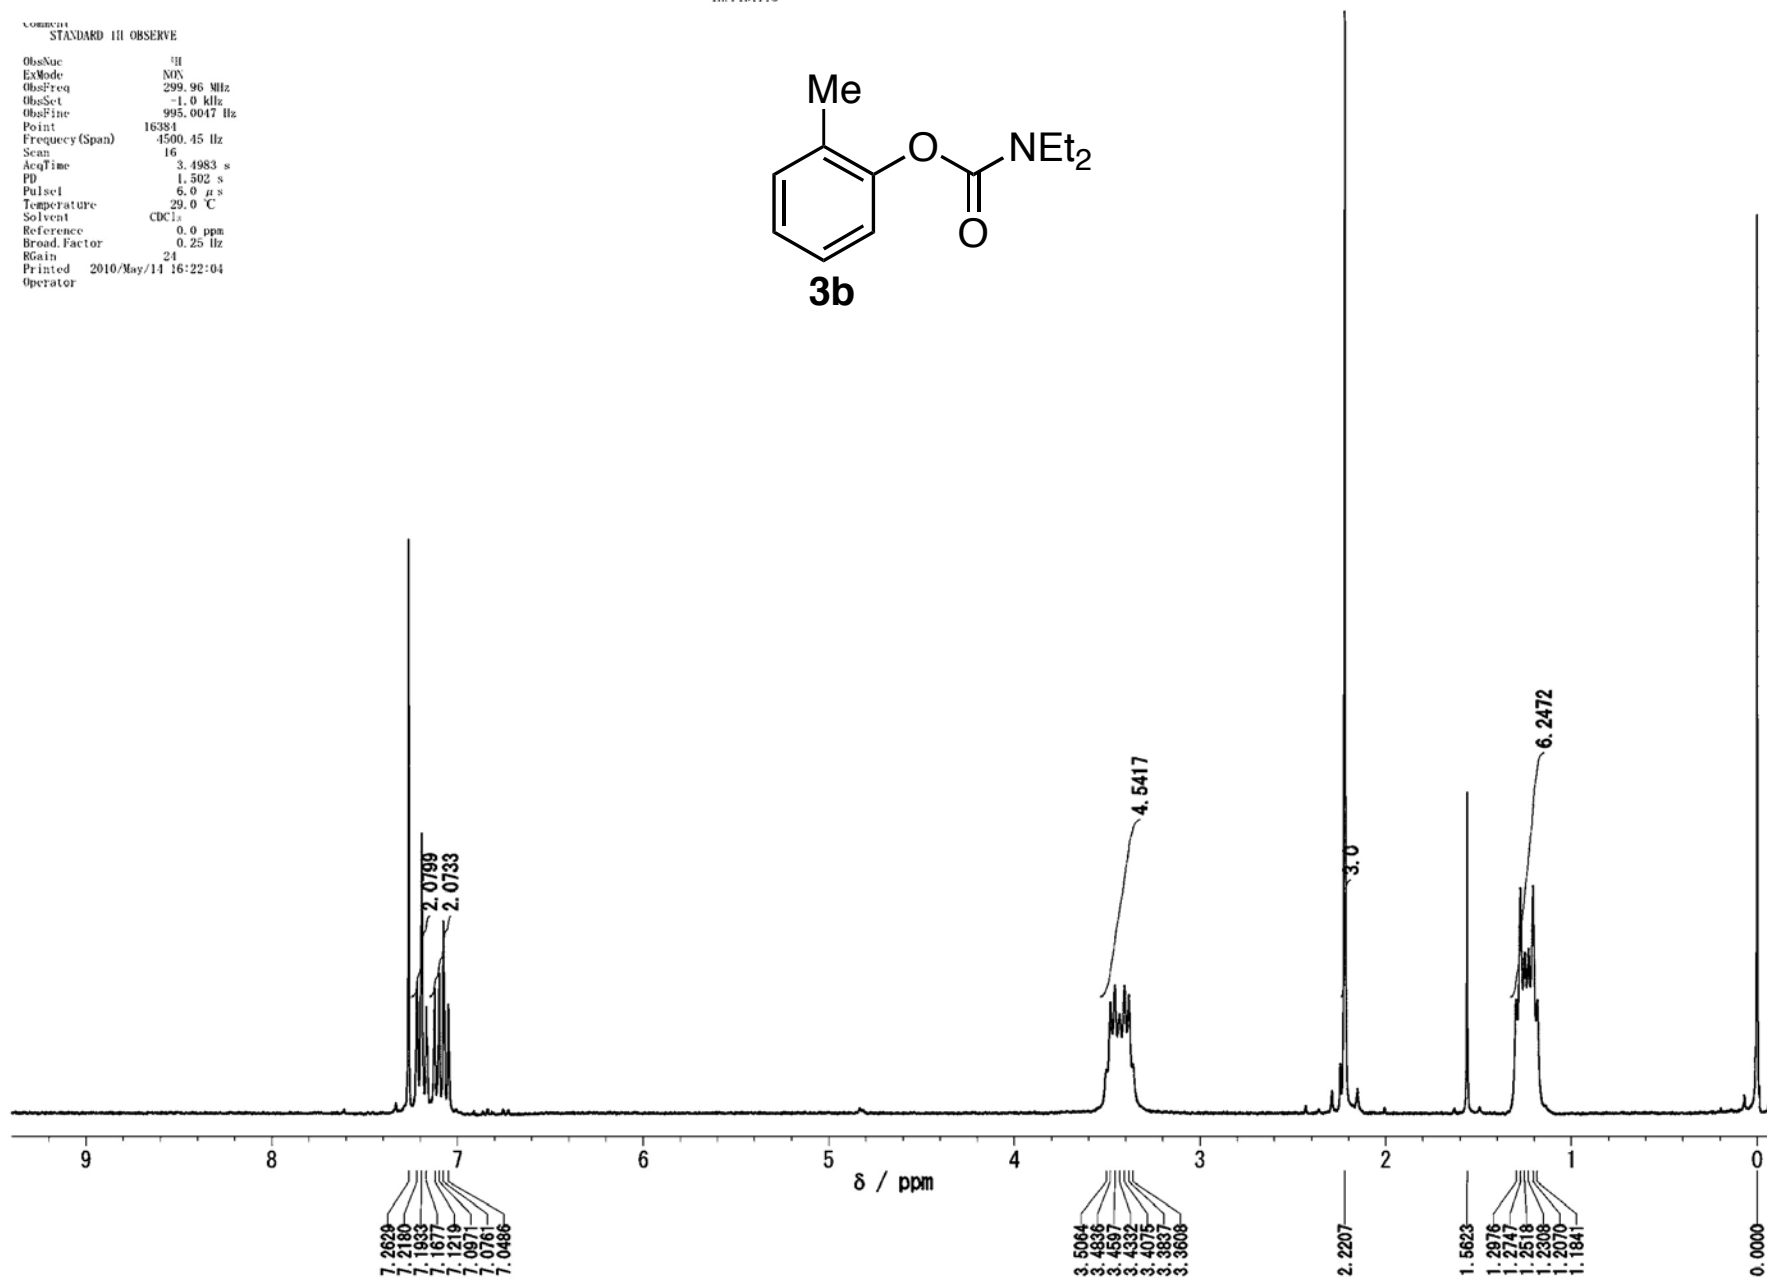

Original File: May 12 10  
 Date  
 Comment  
 C13 Standard Observe  
 Stick\*none Tune=6.4 Match=0.4

ObsNuc  $^{13}\text{C}$   
 ExMode NOX  
 ObsFreq 75.43 MHz  
 ObsSet -1.0 kHz  
 ObsFine 996.3672 Hz  
 Point 32768  
 Frequency (Span) 18761.73 Hz  
 Scan 256  
 AcqTime 1.4992 s  
 PD 1.501 s  
 Pulse1 6.0  $\mu\text{s}$   
 Temperature 29.0  $^{\circ}\text{C}$   
 Solvent  $\text{CDCl}_3$   
 Reference 77.0 ppm  
 Broad.Factor 0.2863 Hz  
 RGain 30  
 Printed 2010/May/14 16:23:57  
 Operator

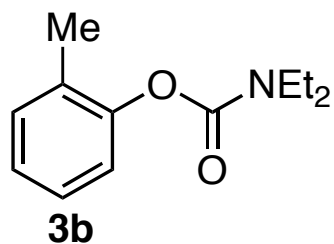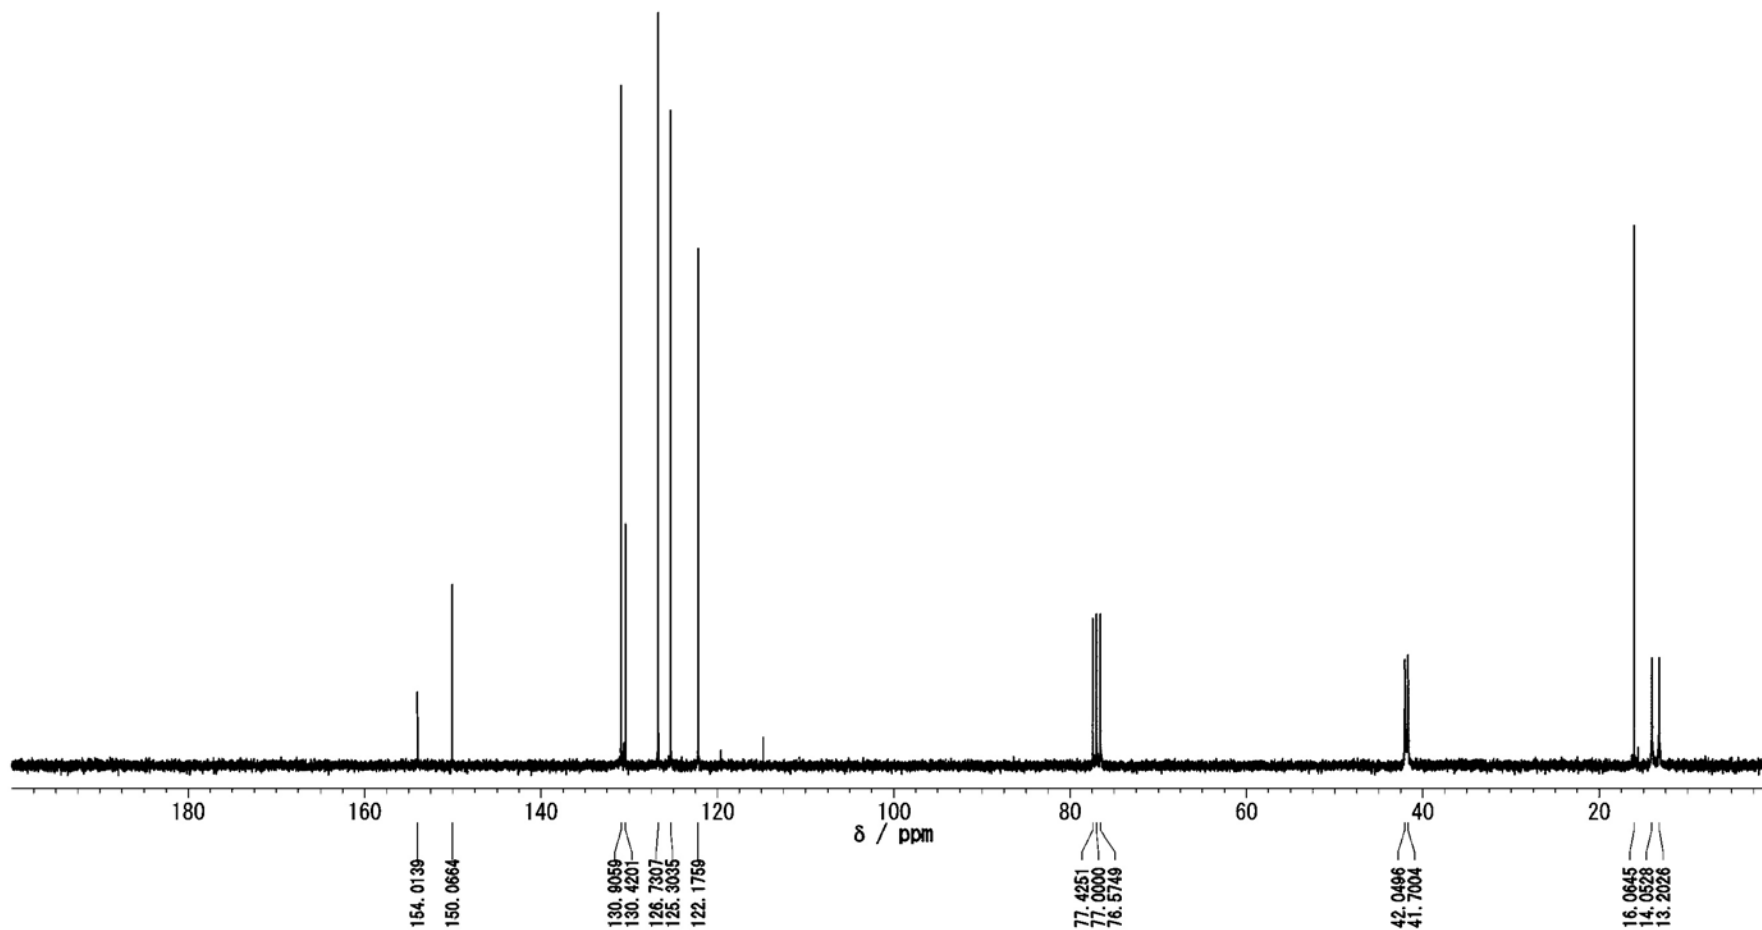

Original File:  
Date: Oct 22 09  
Comment:  
STANDARD 1H OBSERVE

ObsSp: 3H  
ExMode: NOE  
ObsFreq: 299.96 MHz  
ObsSet: 1.0 kHz  
ObsLine: 993.0017 Hz  
Pulse: 16384  
Frequency (Spun): 1500.15 Hz  
Scan: 16  
AcqTime: 3.1983 s  
PD: 1.502 s  
Pulse: 6.0  $\mu$ s  
Temperature: 29.0  $^{\circ}$ C  
Solvent: CDCl<sub>3</sub>  
Reference: 0.0 ppm  
Broad Factor: 0.1473 Hz  
Klein: 19  
Printed: 2010 May 13 21:40:10  
Operator:

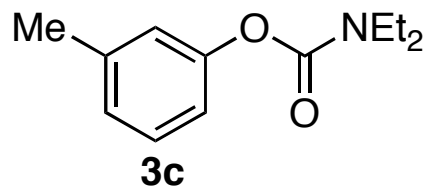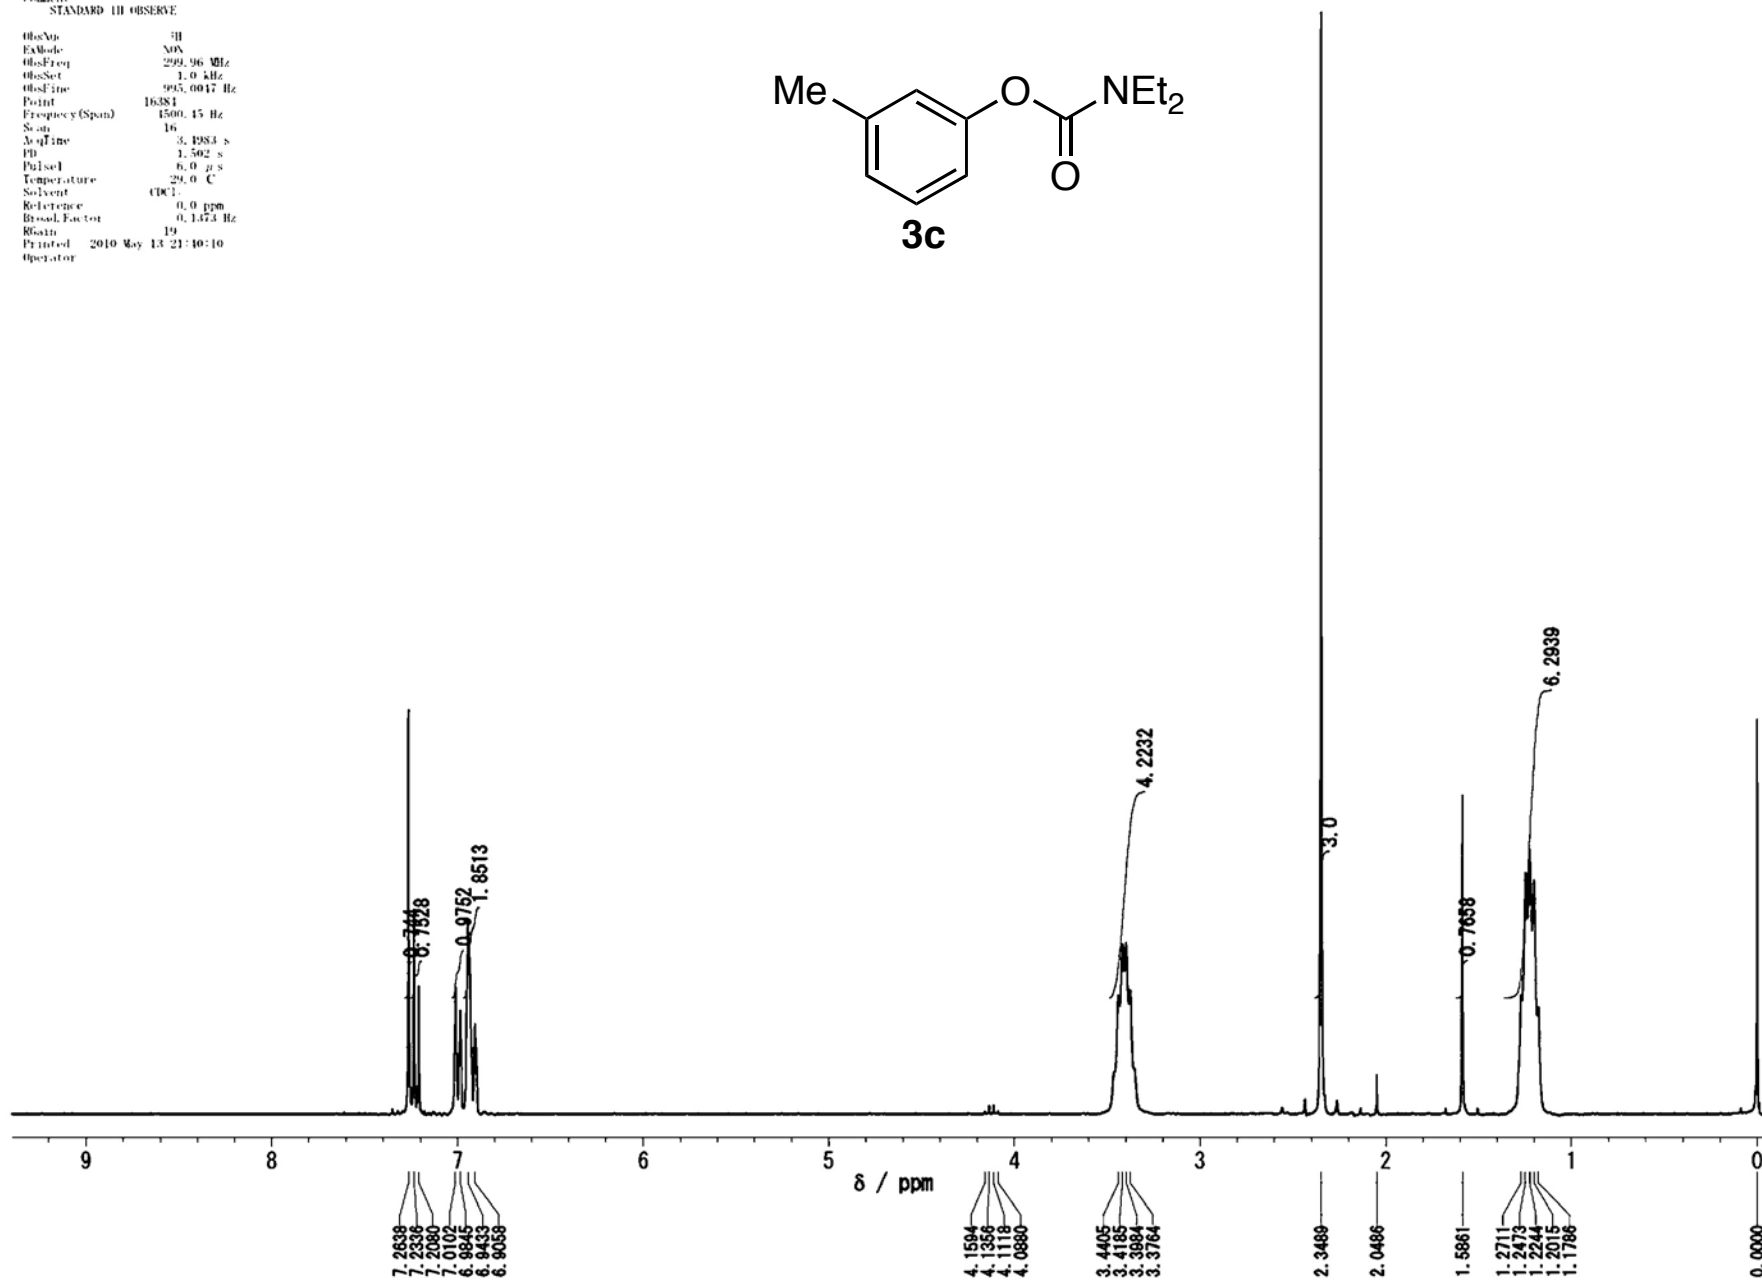

Original File:  
Date May 12 10  
Comment  
C13 Standard Observe  
Stick\*none Tune=6.4 Match=0.4

ObsNuc  $^{13}\text{C}$   
ExMode NOX  
ObsFreq 75.43 MHz  
ObsSet 1.0 kHz  
ObsFine 996.3672 Hz  
Point 32768  
Frequency (Span) 18761.73 Hz  
Scan 128  
AcqTime 1.4992 s  
PD 1.501 s  
Pulse1 6.0  $\mu\text{s}$   
Temperature 29.0  $^{\circ}\text{C}$   
Solvent  $\text{CDCl}_3$   
Reference 77.0 ppm  
Broad.Factor 0.2863 Hz  
RGain 30  
Printed 2010/May/14 15:16:16  
Operator

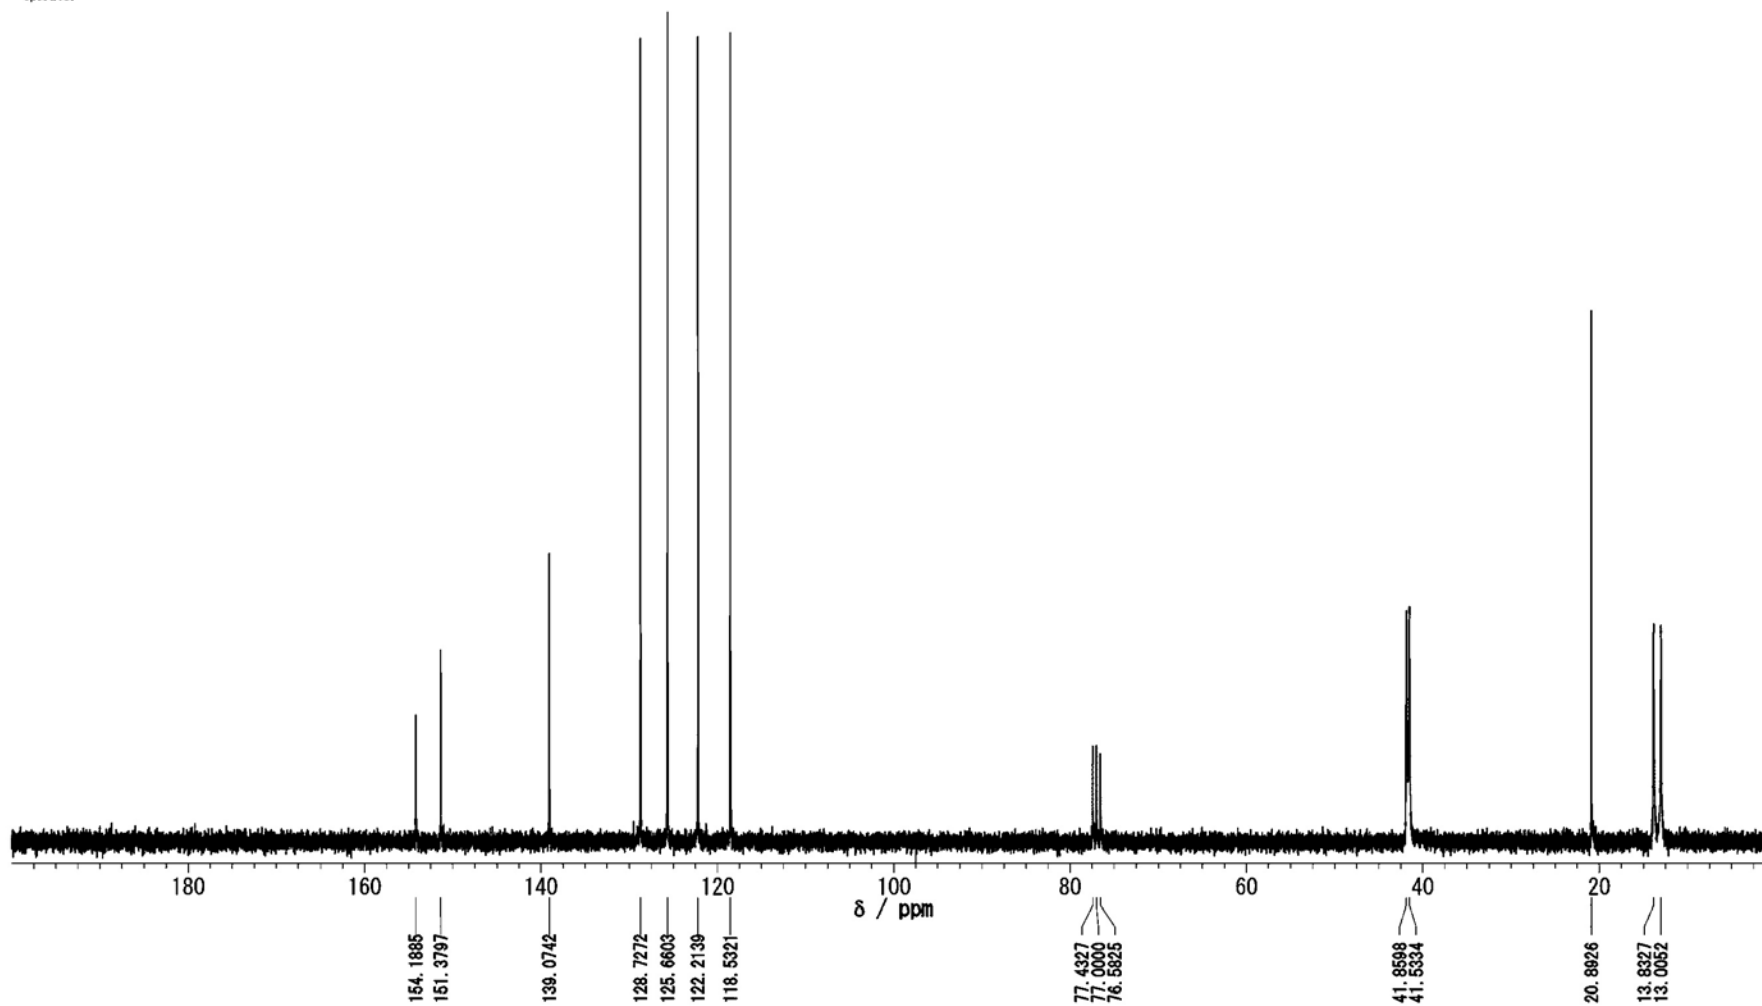

Original File:  
Date: Oct 26 09  
Comment: STANDARD 1H OBSERVE

ObsNuc:  $^1\text{H}$   
ExMode: NON  
ObsFreq: 299.96 MHz  
ObsSet: 1.0 kHz  
ObsPine: 995.0047 Hz  
Point: 16384  
Frequency (Span): 4500.45 Hz  
Scan: 16  
AcqTime: 3.4983 s  
PD: 1.502 s  
Pulse1: 6.0  $\mu$ s  
Temperature: 29.0  $^{\circ}\text{C}$   
Solvent:  $\text{CDCl}_3$   
Reference: 0.0 ppm  
Broad. Factor: 0.1373 Hz  
RGain: 30  
Printed: 2010/May/13 21:34:13  
Operator:

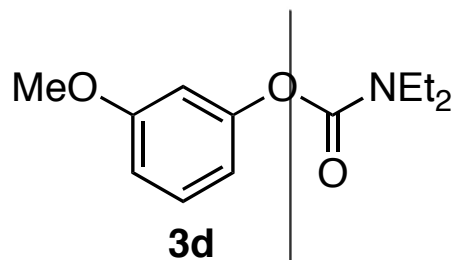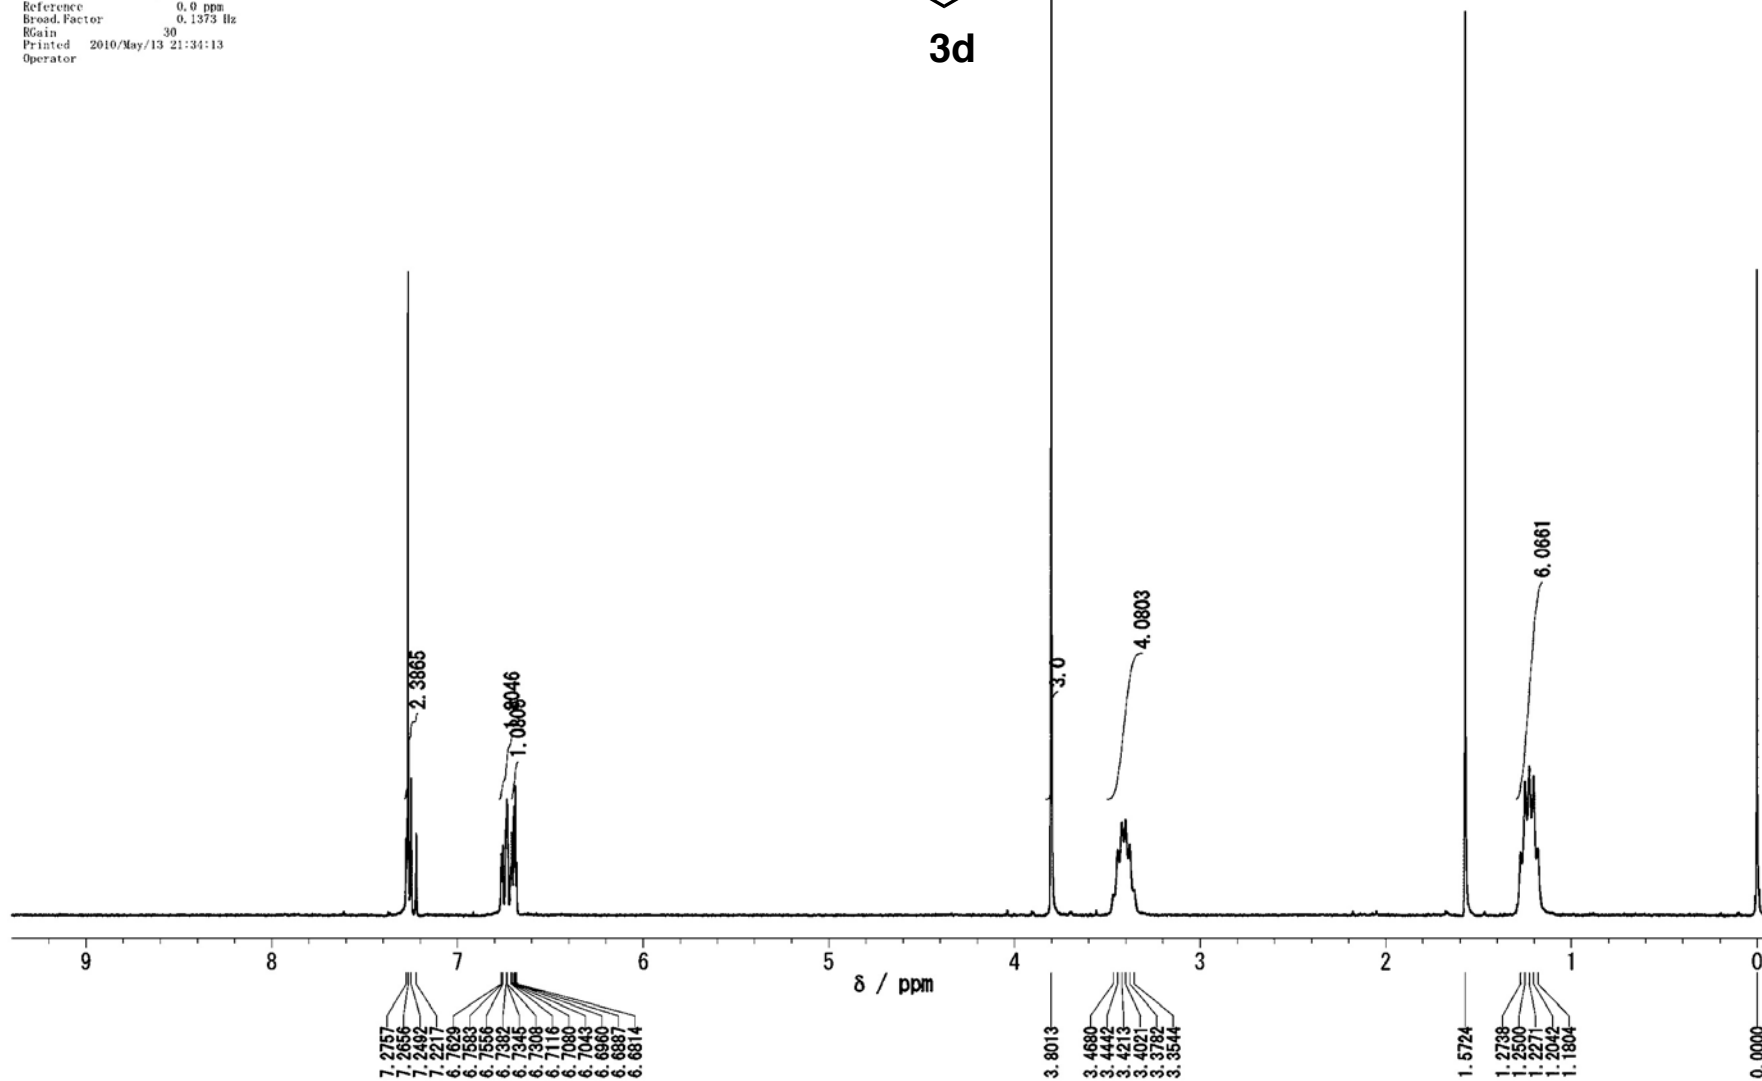



Original File: Mar 4 10  
 Date  
 Comment  
 C13 Standard Observe  
 Stick\*none Tune=6.4 Match=0.4

ObsNuc <sup>13</sup>C  
 ExMode NOX  
 ObsFreq 75.43 MHz  
 ObsSet 1.0 kHz  
 ObsFine 996.3672 Hz  
 Point 32768  
 Frequency (Span) 18761.73 Hz  
 Scan 128  
 AcqTime 1.4992 s  
 PD 1.501 s  
 Pulse1 6.0 μs  
 Temperature 29.0 °C  
 Solvent CDCl<sub>3</sub>  
 Reference 77.0 ppm  
 BroadFactor 0.2863 Hz  
 RGain 30  
 Printed 2010/May/14 15:20:40  
 Operator

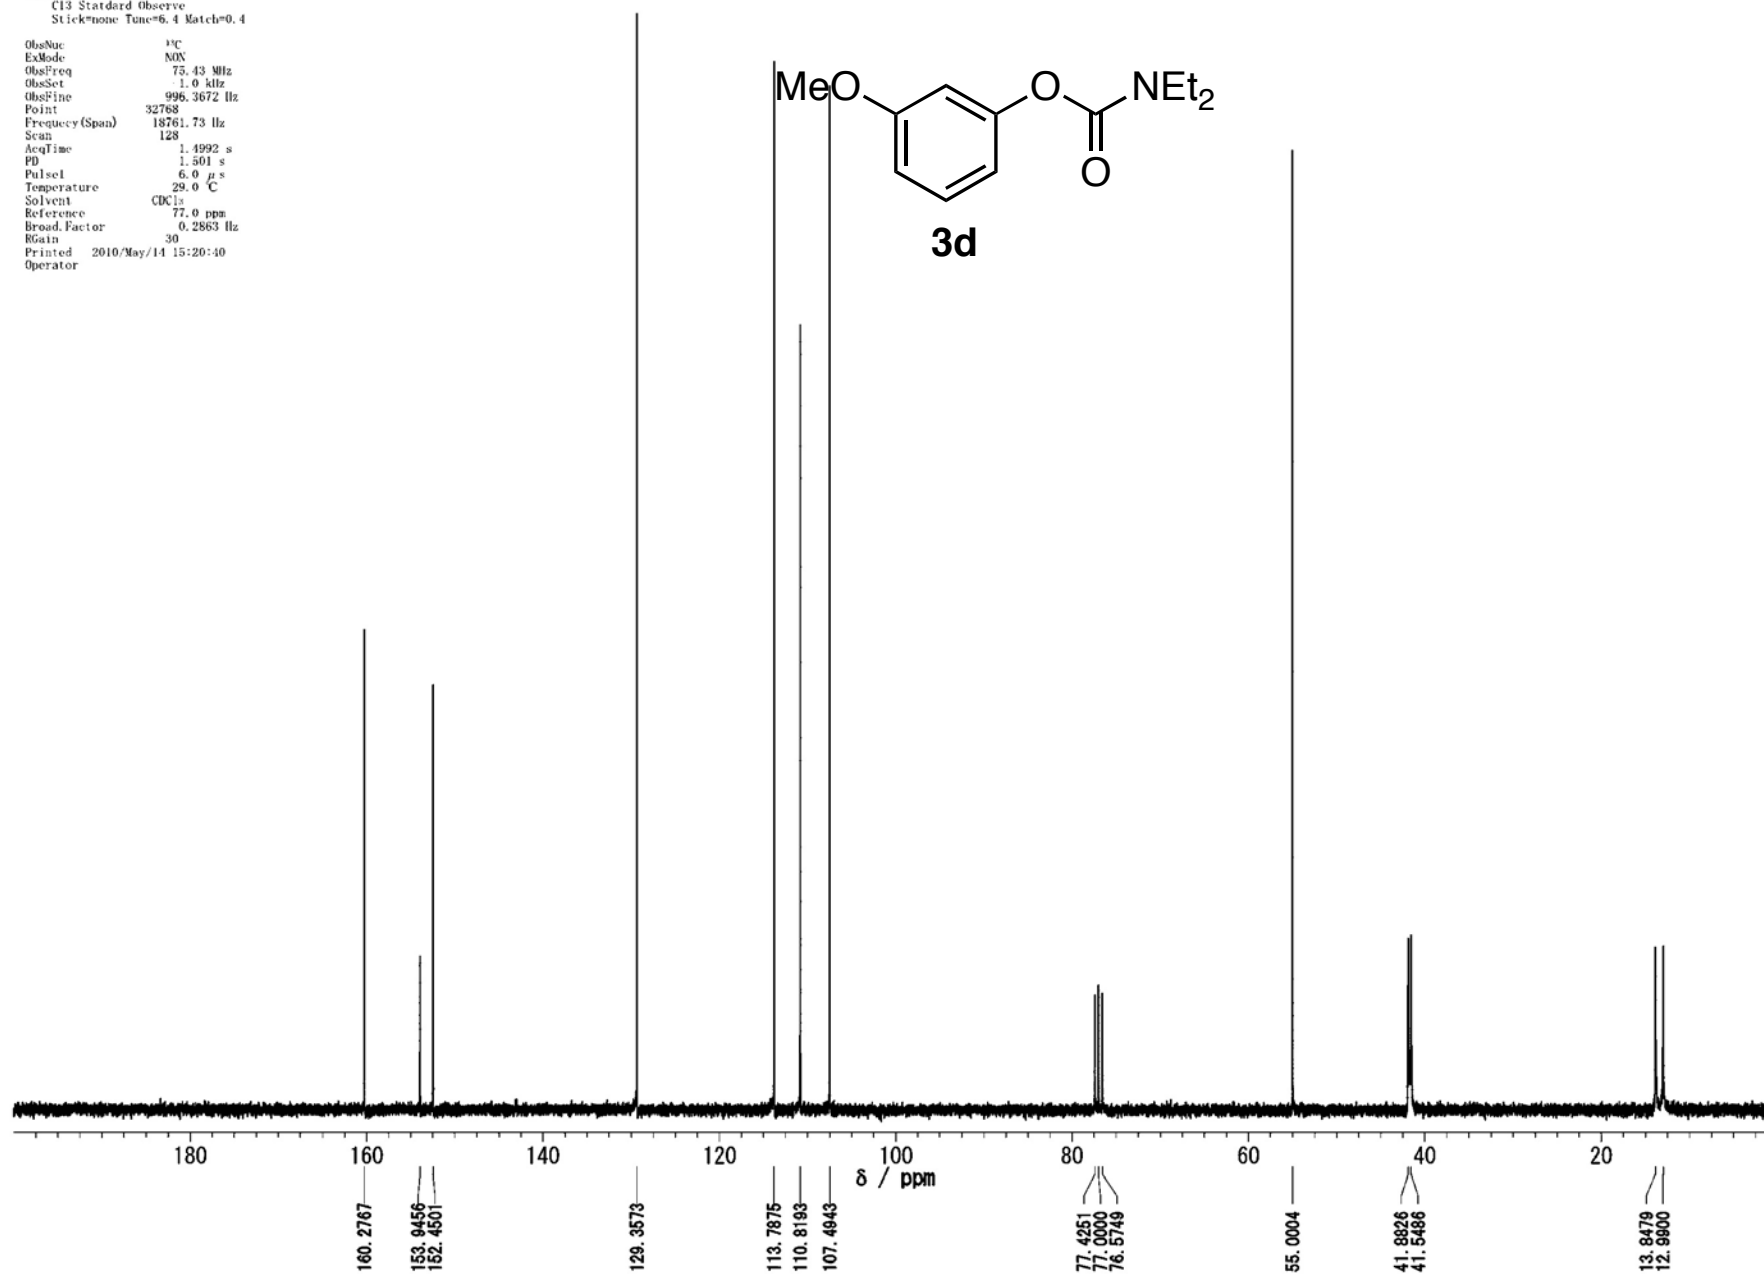

Original File:   
 Date: Oct 27 09   
 Comment: STANDARD 1H OBSERVE   
 ObsXue: 30   
 ExMode: NOE   
 ObsFreq: 299.96 MHz   
 ObsSet: 1.0 kHz   
 ObsTime: 995.0047 Hz   
 Poin1: 16381   
 Frequency (Spool): 1500.15 Hz   
 Scan: 16   
 AcqTime: 3.1983 s   
 P1: 1.502 s   
 Pulse1: 6.0 ps   
 Temperature: 29.0 °C   
 Solvent: CDCl<sub>3</sub>   
 Reference: 0.0 ppm   
 Broad Factor: 0.1373 Hz   
 RGain: 30   
 Printed: 2010 May 02 16:30:10   
 Operator:

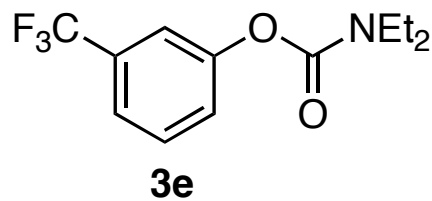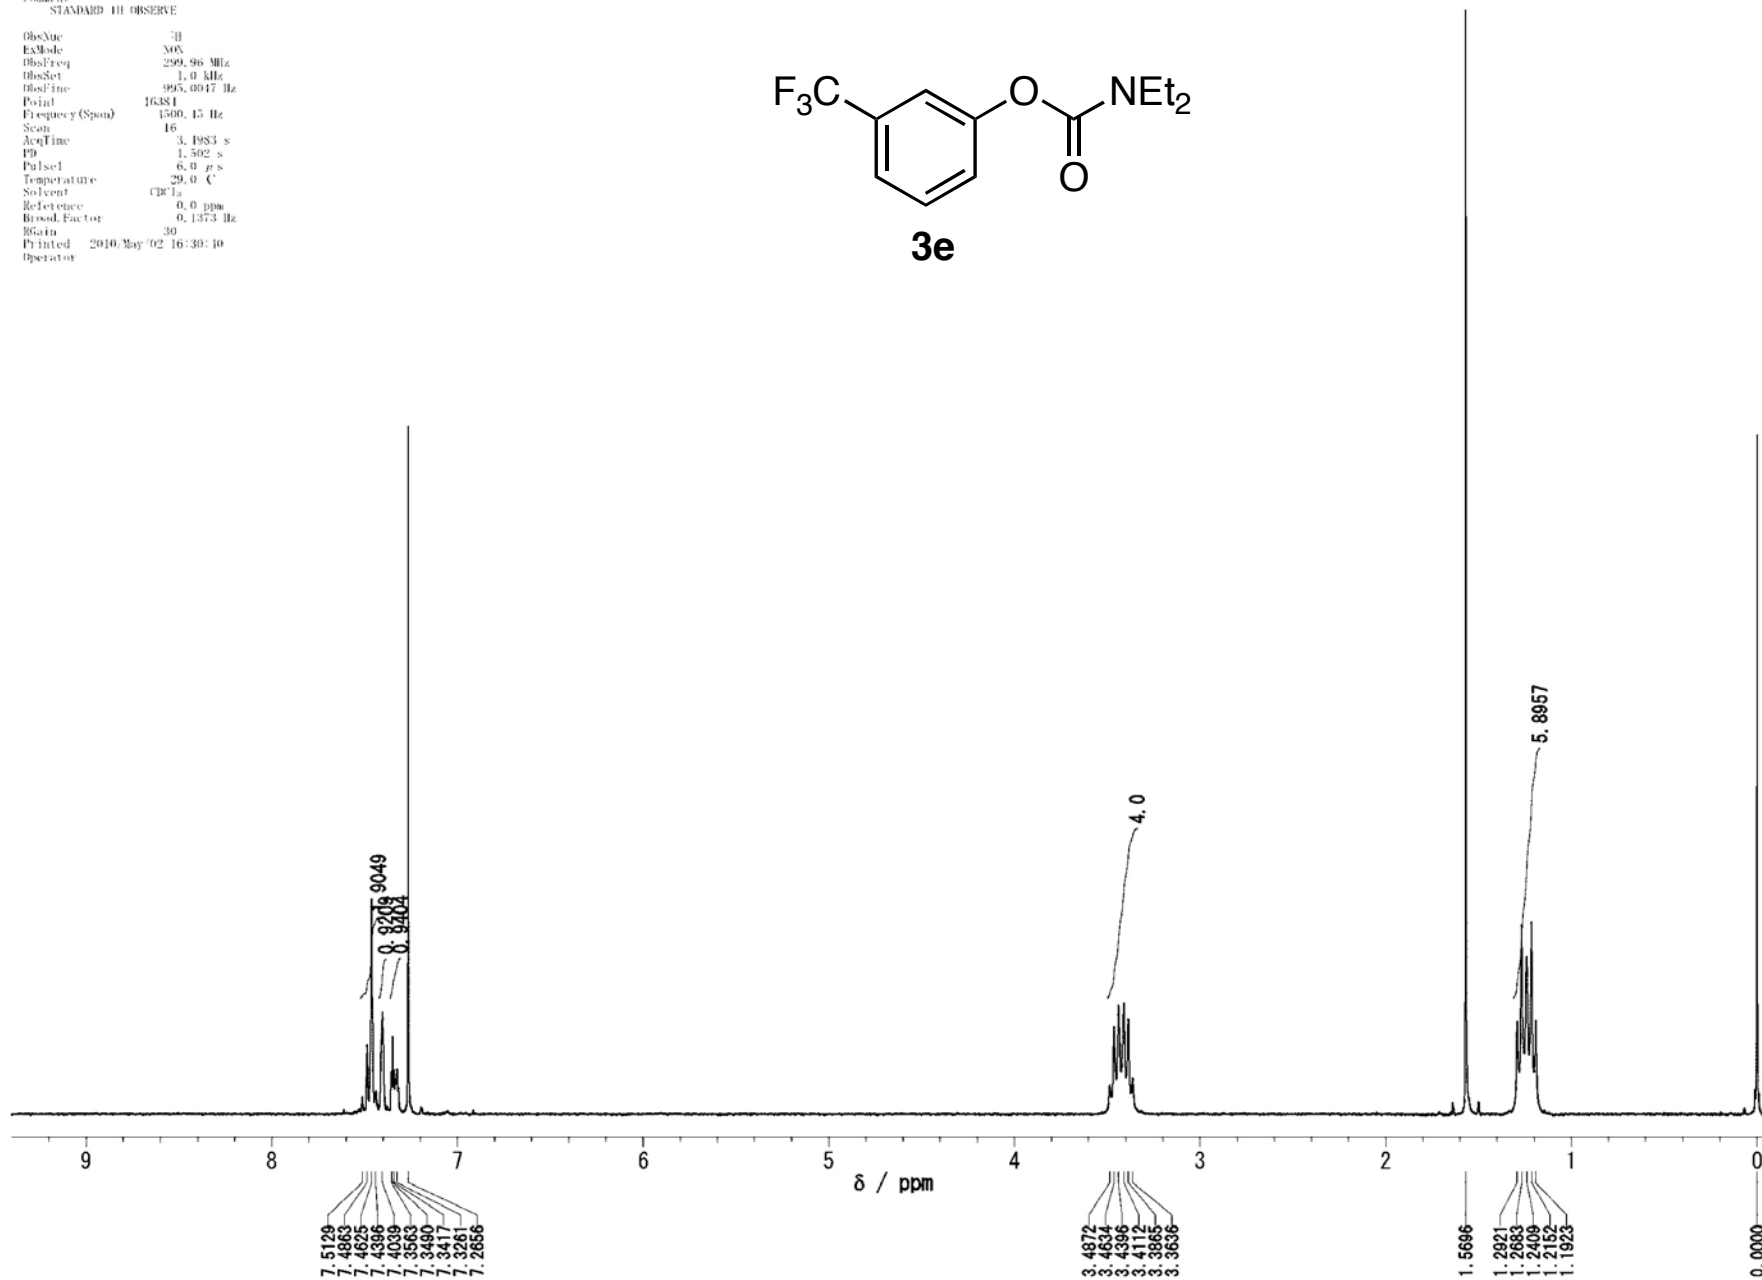

Original File: Apr 29 10  
 Date  
 Comment  
 C13 Standard Observe  
 Stick\*none Tune\*6.4 Match\*0.4

ObsNuc <sup>13</sup>C  
 ExMode NOX  
 ObsFreq 75.43 MHz  
 ObsSet 1.0 kHz  
 ObsPine 996.3672 Hz  
 Point 32768  
 Frequency (Span) 18761.73 Hz  
 Scan 10000  
 AcqTime 1.45  
 PD 1.33  
 Pulse 6.02  
 Temperature 29.0 °C  
 Solvent CDCl<sub>3</sub>  
 Reference 77.0 ppm  
 Broad Factor 0.2863 Hz  
 RGain 30  
 Printed 2010/May/02 16:32:00  
 Operator

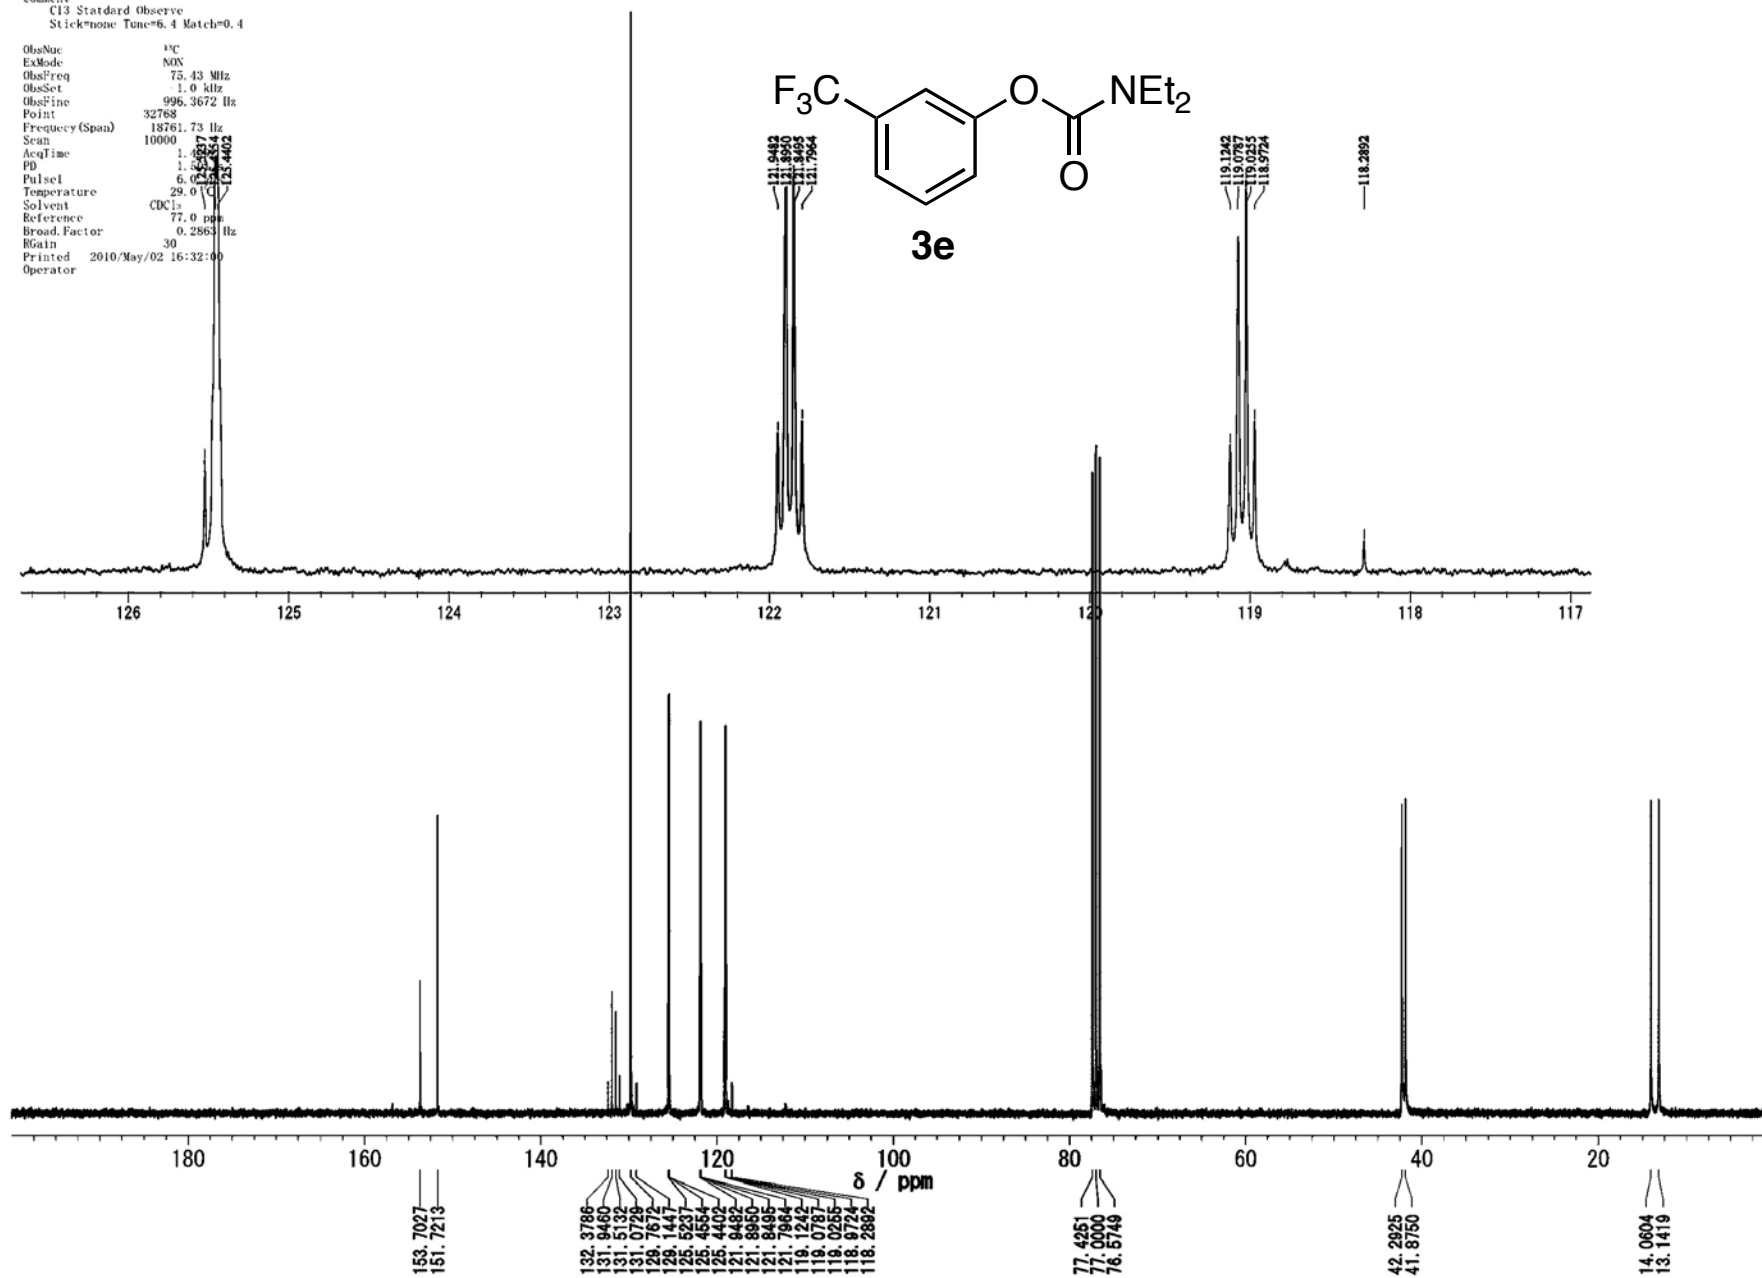

Original File:  
 Date Apr 30 10  
 Comment STANDARD 1H OBSERVE  
 ObsNuc <sup>1</sup>H  
 ExMode NOX  
 ObsFreq 299.96 MHz  
 ObsSet 1.0 kHz  
 ObsPine 995.0047 Hz  
 Point 16384  
 Frequency (Span) 4500.45 Hz  
 Scan 16  
 AcqTime 3.4983 s  
 PD 1.502 s  
 Pulse 6.0  $\mu$ s  
 Temperature 29.0  $^{\circ}$ C  
 Solvent CDCl<sub>3</sub>  
 Reference 0.0 ppm  
 Broad. Factor 0.1373 Hz  
 RGain 30  
 Printed 2010/Jun/24 14:32:47  
 Operator

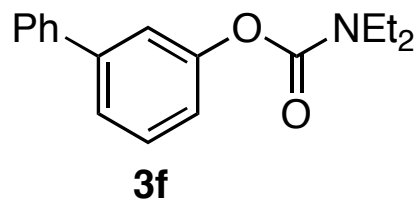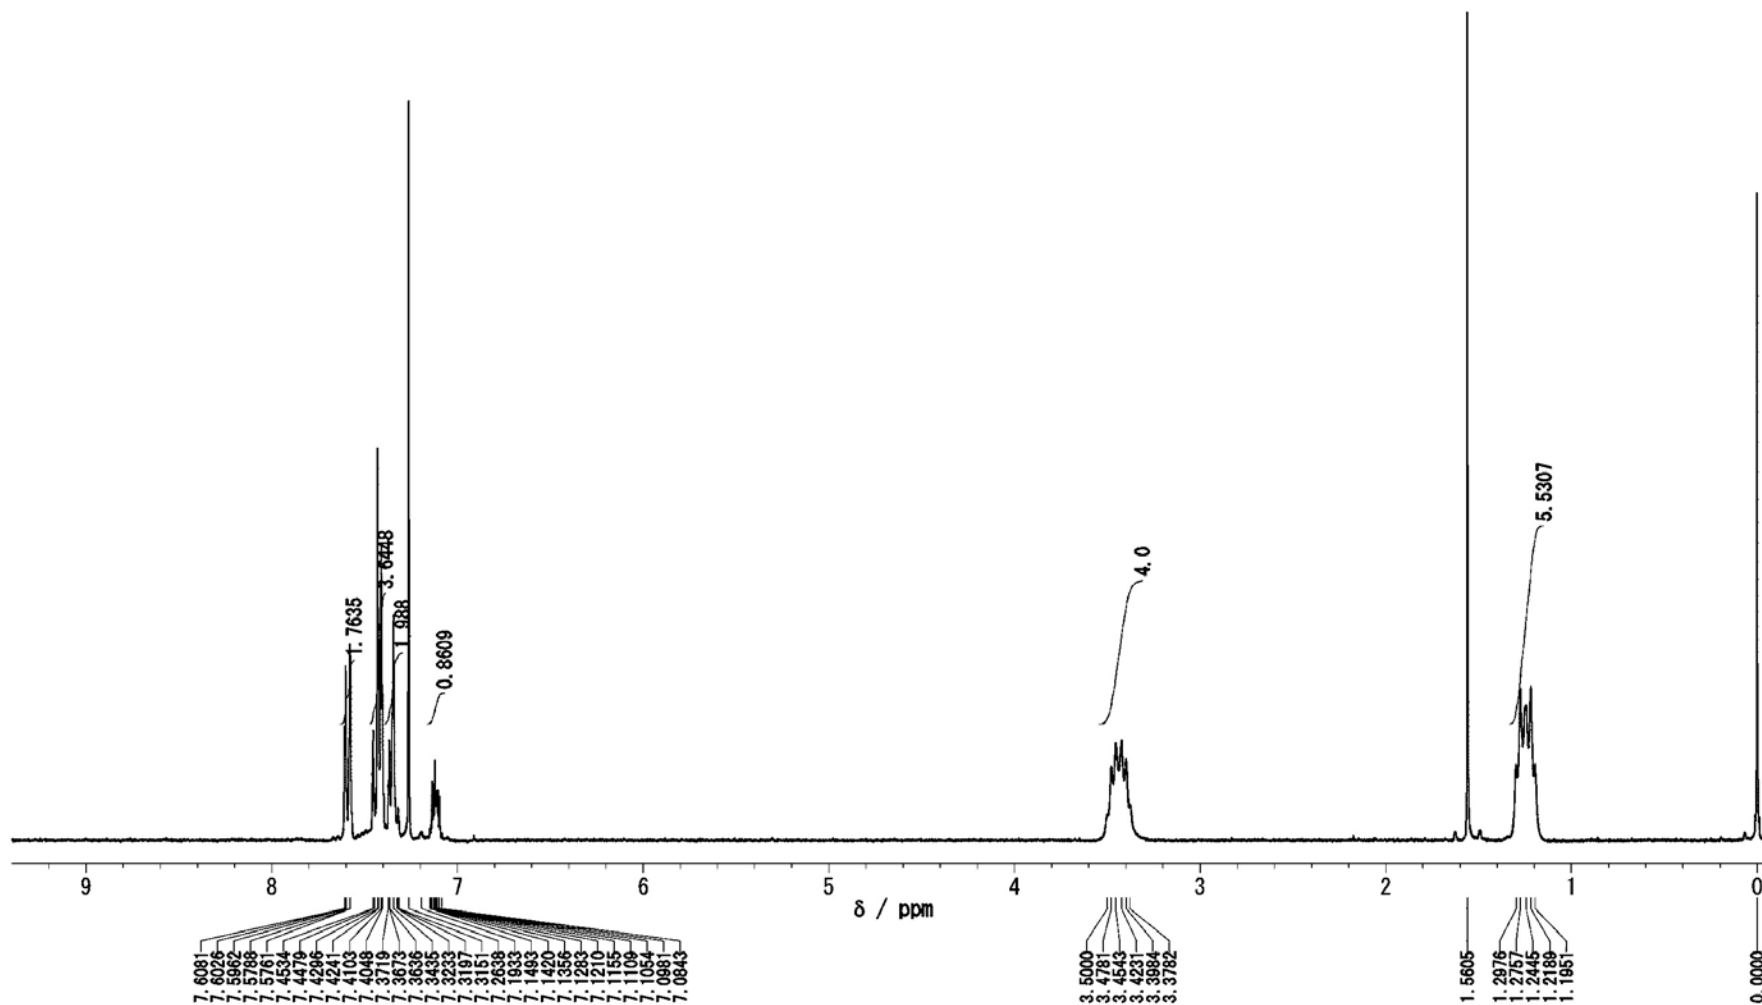

Original File:  
 Date Mar 5 10  
 Comment C13 Standard Observe  
 Stick=none Tune=6.4 Match=0.4

ObsNuc <sup>13</sup>C  
 ExMode NON  
 ObsFreq 75.43 MHz  
 ObsSet -1.0 kHz  
 ObsFine 996.3672 Hz  
 Point 32768  
 Frequency (Span) 18761.73 Hz  
 Scan 128  
 AcqTime 1.4992 s  
 P0 1.501 s  
 Pulsol 6.0  $\mu$ s  
 Temperature 29.0  $^{\circ}$ C  
 Solvent CDCl<sub>3</sub>  
 Reference 77.0 ppm  
 Broad.Factor 0.2863 Hz  
 RGain 30  
 Printed 2010/May/02 16:36:16  
 Operator

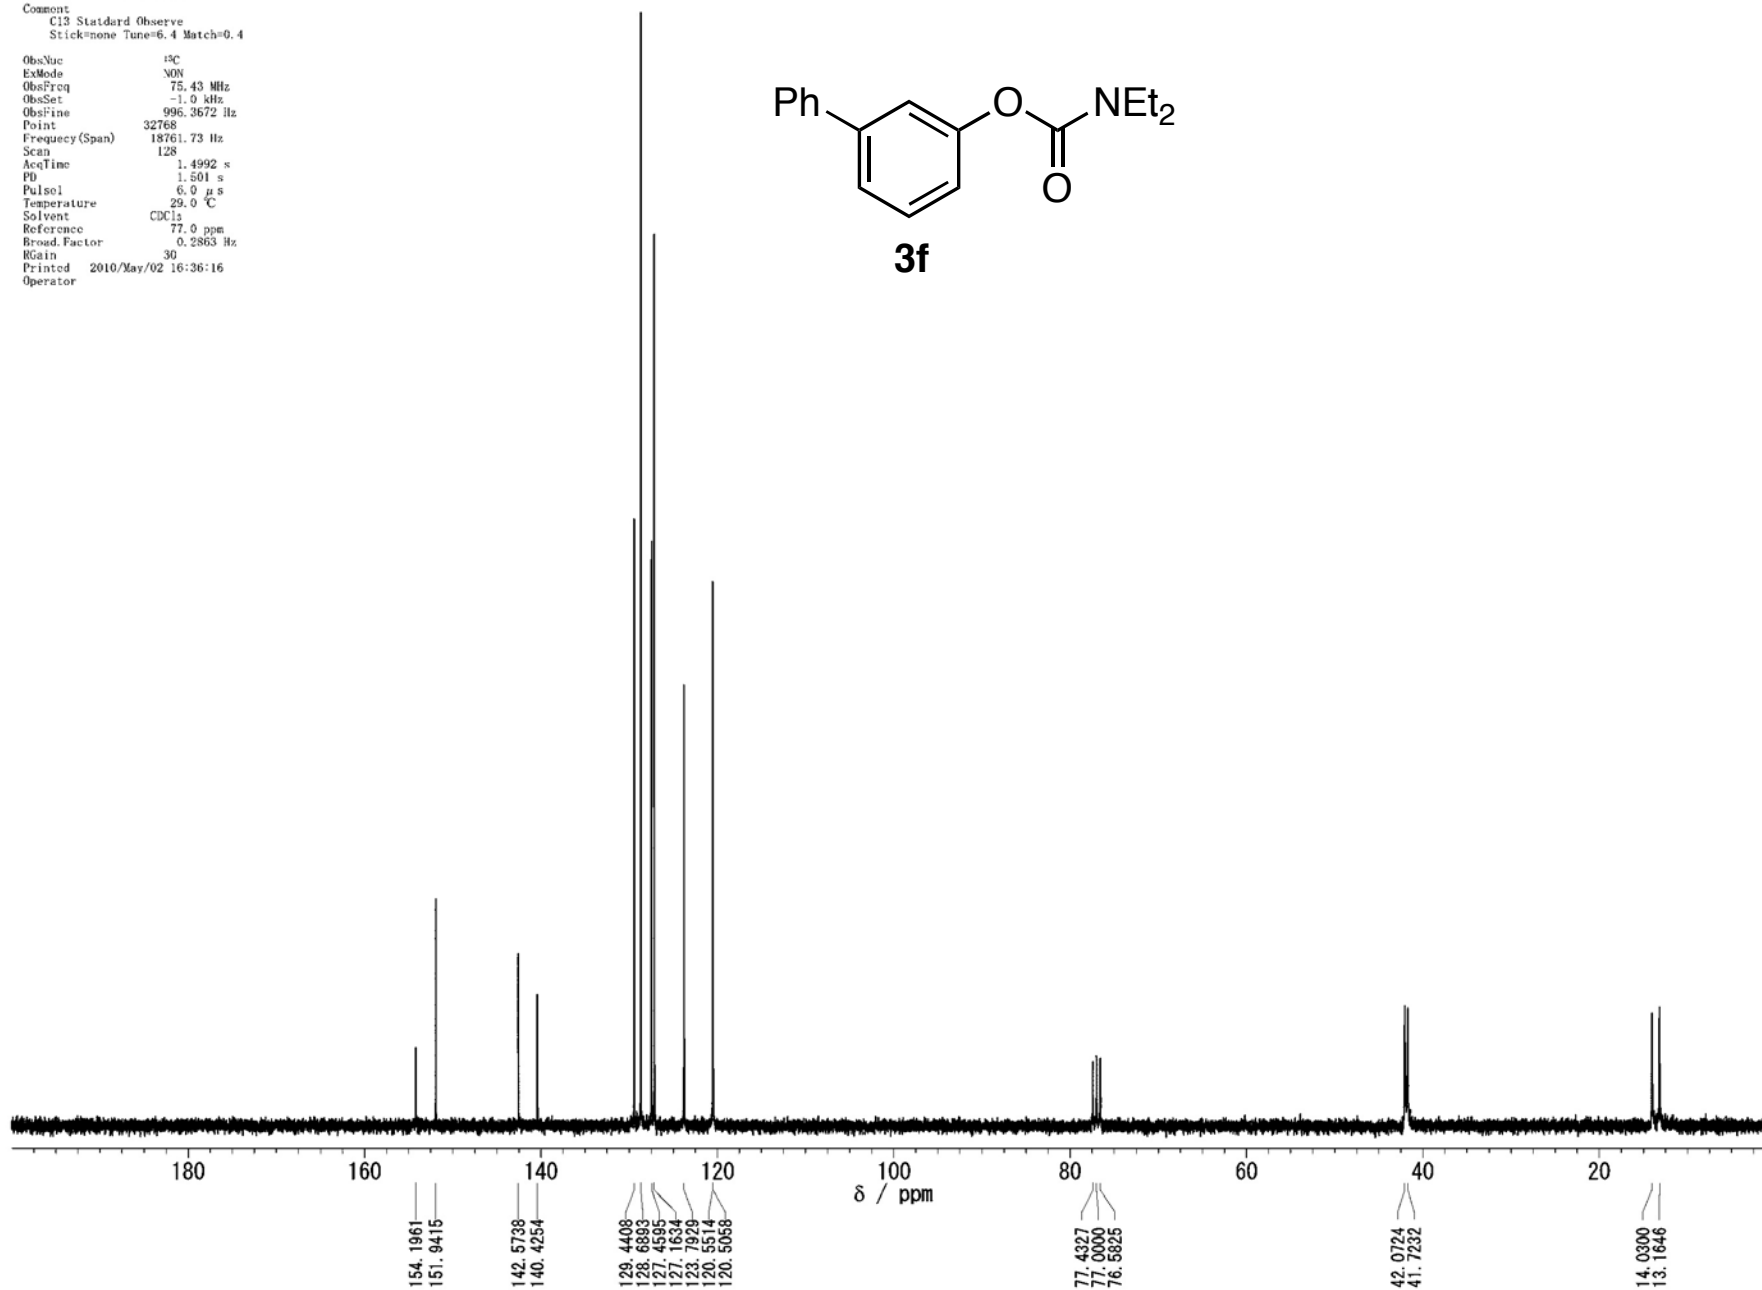

Original File: Nov 5 09  
 Date: Nov 5 09  
 Comment: STANDARD 1H OBSERVE  
 ObsNuc: <sup>1</sup>H  
 ExMode: NON  
 ObsFreq: 299.96 MHz  
 ObsSet: 1.0 kHz  
 ObsPine: 995.0047 Hz  
 Point: 16384  
 Frequency (Span): 4500.45 Hz  
 Scan: 16  
 AcqTime: 3.4983 s  
 PD: 1.502 s  
 Pulse1: 6.0  $\mu$ s  
 Temperature: 29.0  $^{\circ}$ C  
 Solvent: CDCl<sub>3</sub>  
 Reference: 0.0 ppm  
 Broad. Factor: 0.1373 Hz  
 RGain: 24  
 Printed: 2010/May/13 21:57:58  
 Operator:

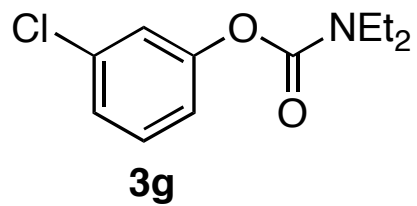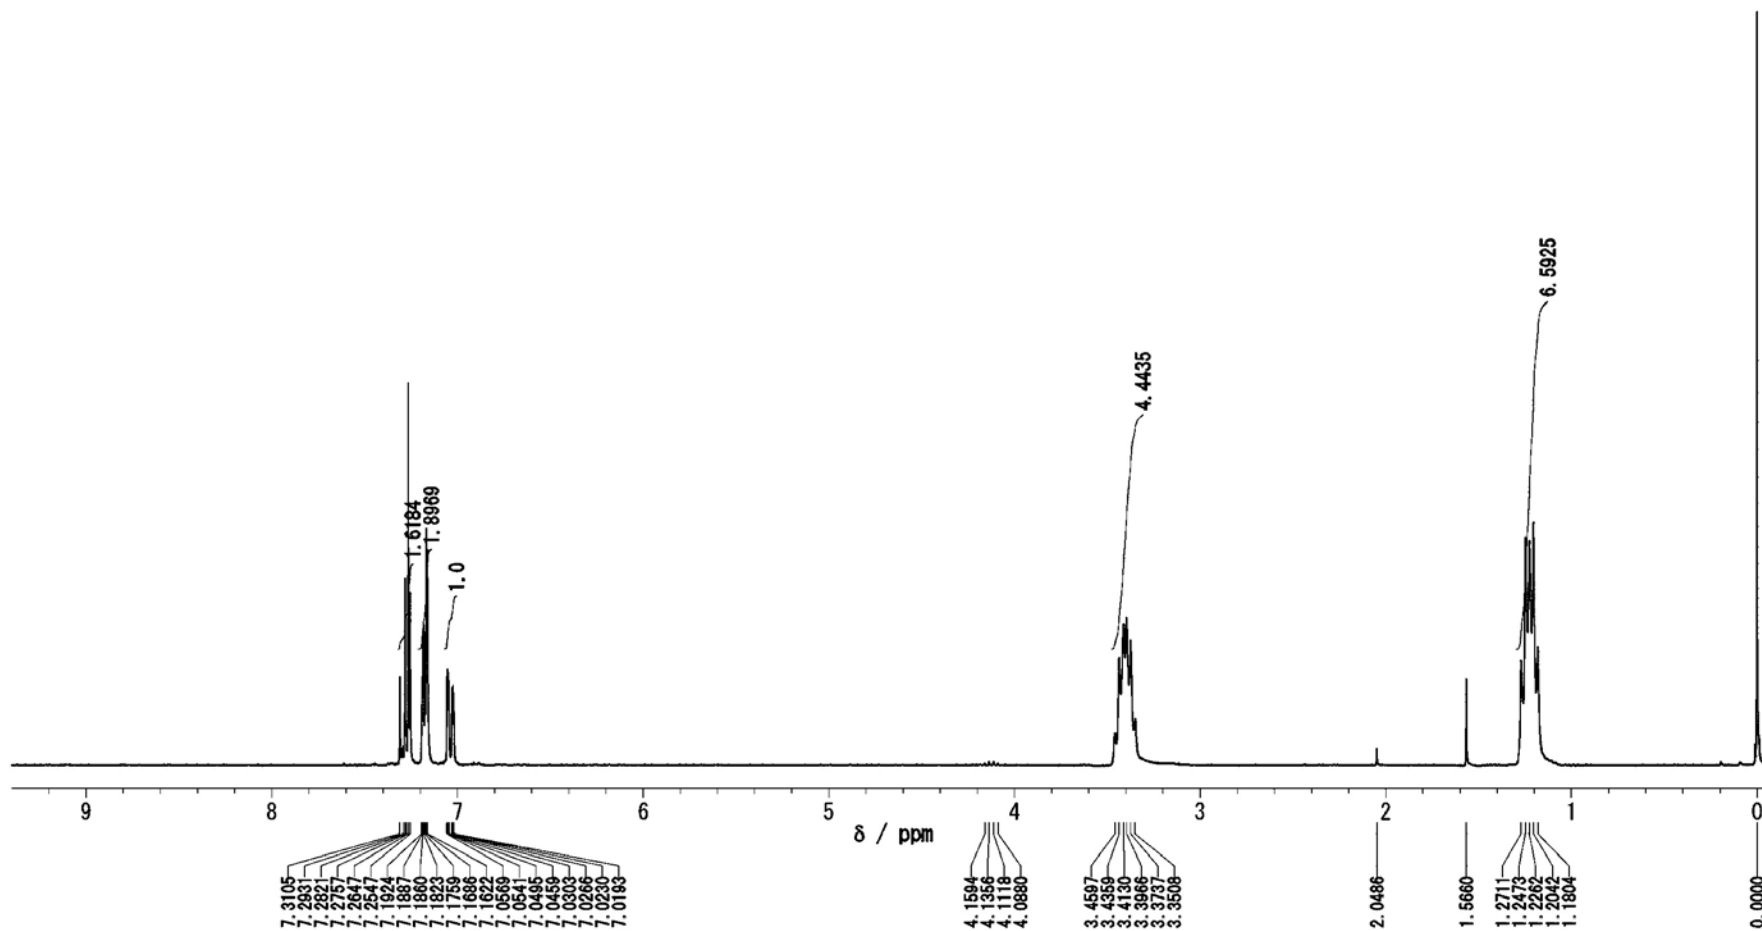

Original File: Mar 5 10  
 Date  
 Comment  
 C13 Standard Observe  
 Stick\*none Tune=6.4 Match=0.4

ObsNuc  $^{13}\text{C}$   
 ExMode NOX  
 ObsFreq 75.43 MHz  
 ObsSet 1.0 kHz  
 ObsFine 996.3672 Hz  
 Point 32768  
 Frequency (Span) 18761.73 Hz  
 Scan 256  
 AcqTime 1.4992 s  
 PD 1.501 s  
 Pulse1 6.0  $\mu\text{s}$   
 Temperature 29.0  $^{\circ}\text{C}$   
 Solvent  $\text{CDCl}_3$   
 Reference 77.0 ppm  
 BroadFactor 0.2863 Hz  
 RGain 30  
 Printed 2010/May/14 15:23:49  
 Operator

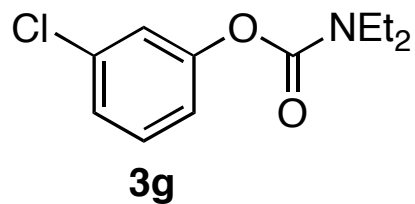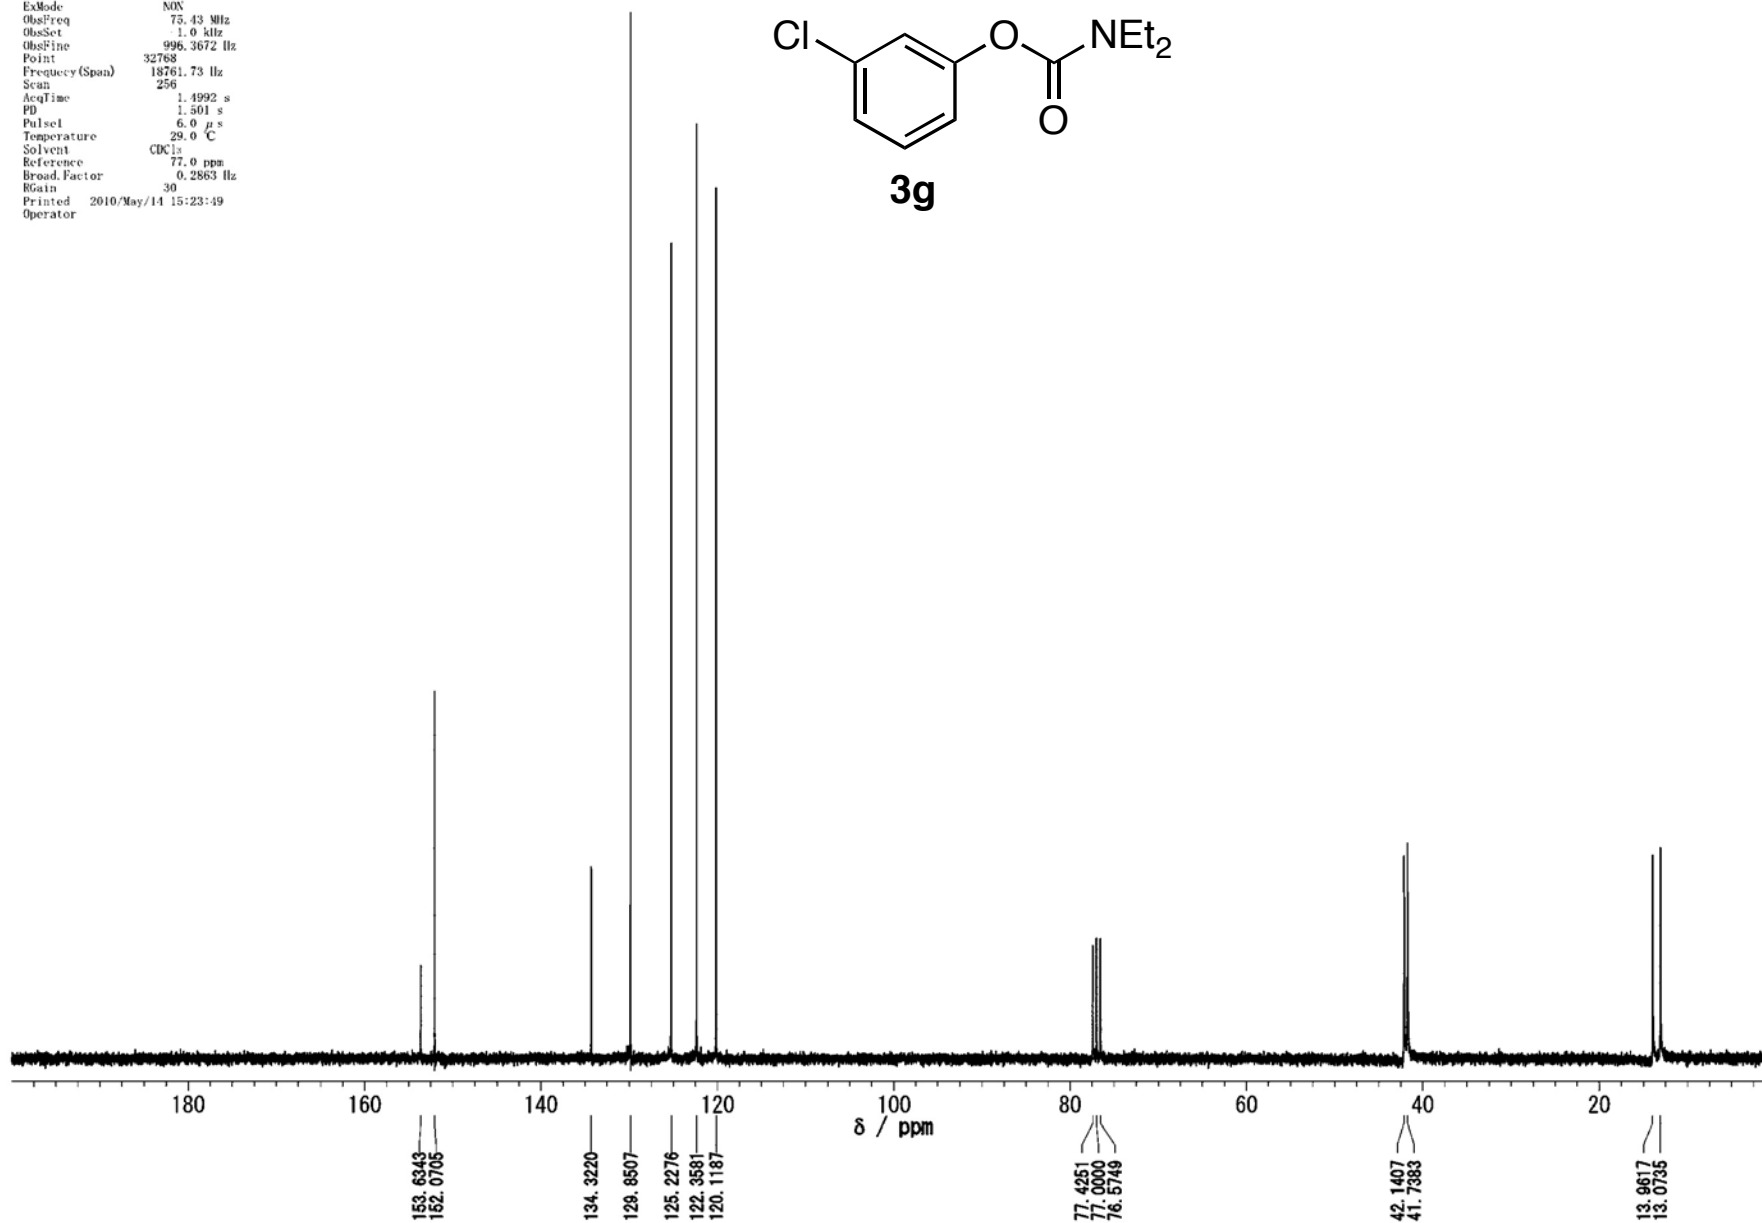

Original File:   
 Date: Sep 26 09   
 Comment: STANDARD 1H OBSERVE   
 ObsNuc: <sup>1</sup>H   
 ExMode: NOX   
 ObsFreq: 299.96 MHz   
 ObsSet: 1.0 kHz   
 ObsPine: 995.0047 Hz   
 Point: 16384   
 Frequency (Span): 4500.45 Hz   
 Scan: 16   
 AcqTime: 3.4983 s   
 PD: 1.502 s   
 Pulse: 6.0 μs   
 Temperature: 29.0 °C   
 Solvent: CDCl<sub>3</sub>   
 Reference: 0.0 ppm   
 Broad Factor: 0.1373 Hz   
 RGain: 24   
 Printed: 2010/Jun/24 14:34:31   
 Operator:

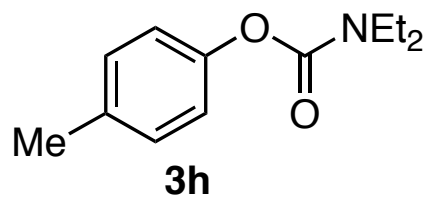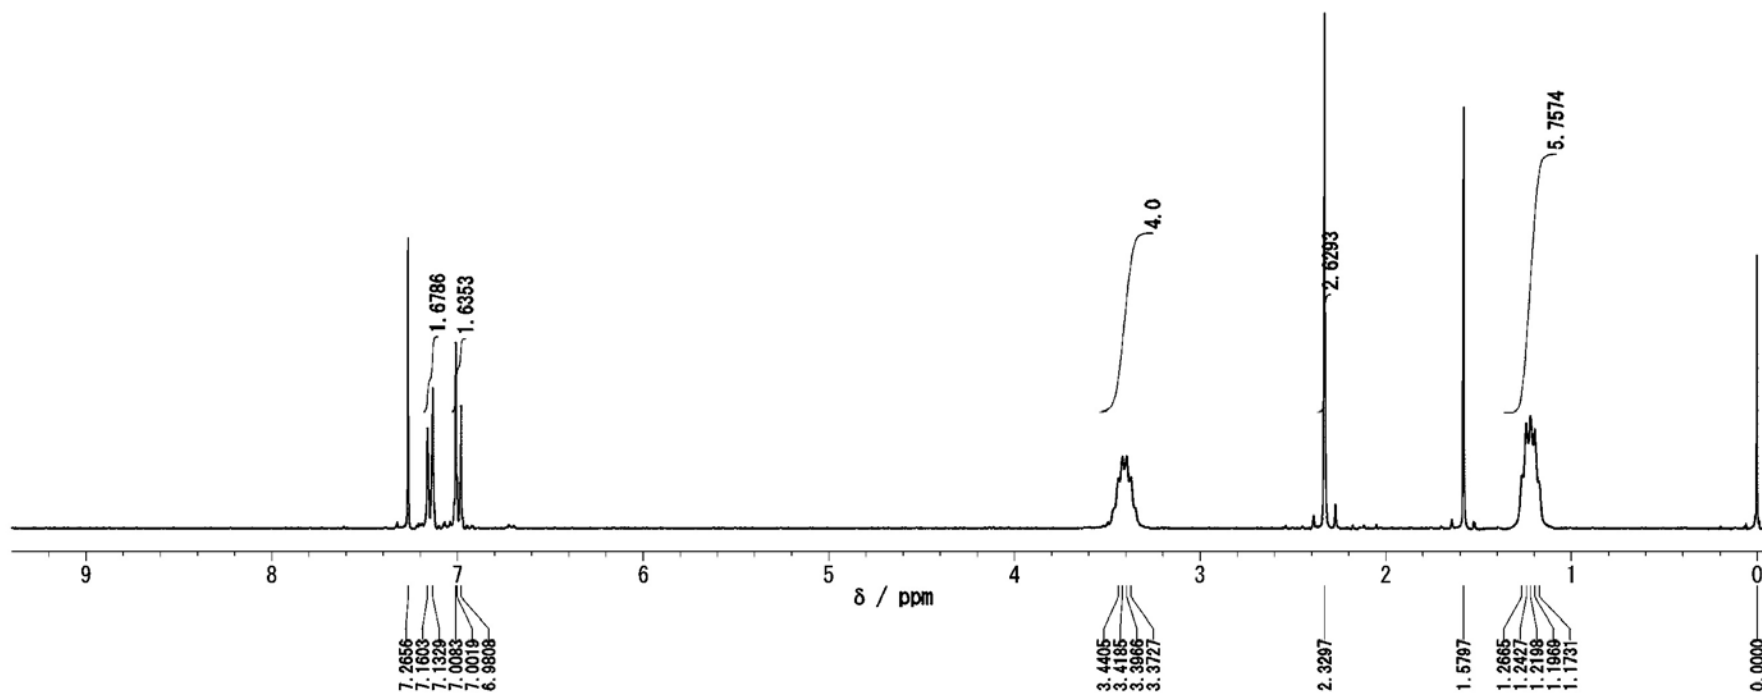



Original File:  
Date Mar 5 10  
Comment  
C13 Standard Observe  
Stick:none Tune=6.4 Match=0.4

ObsNuc  $^{13}\text{C}$   
ExMode NON  
ObsFreq 75.43 MHz  
ObsSet -1.0 kHz  
ObsFine 996.3672 Hz  
Point 32768  
Frequency (Span) 18761.73 Hz  
Scan 128  
AcqTime 1.4992 s  
P0 1.501 s  
Pulsol 6.0  $\mu\text{s}$   
Temperature 29.0  $^{\circ}\text{C}$   
Solvent  $\text{CDCl}_3$   
Reference 77.0 ppm  
Broad.Factor 0.2863 Hz  
RGain 30  
Printed 2010/May/02 16:40:20  
Operator

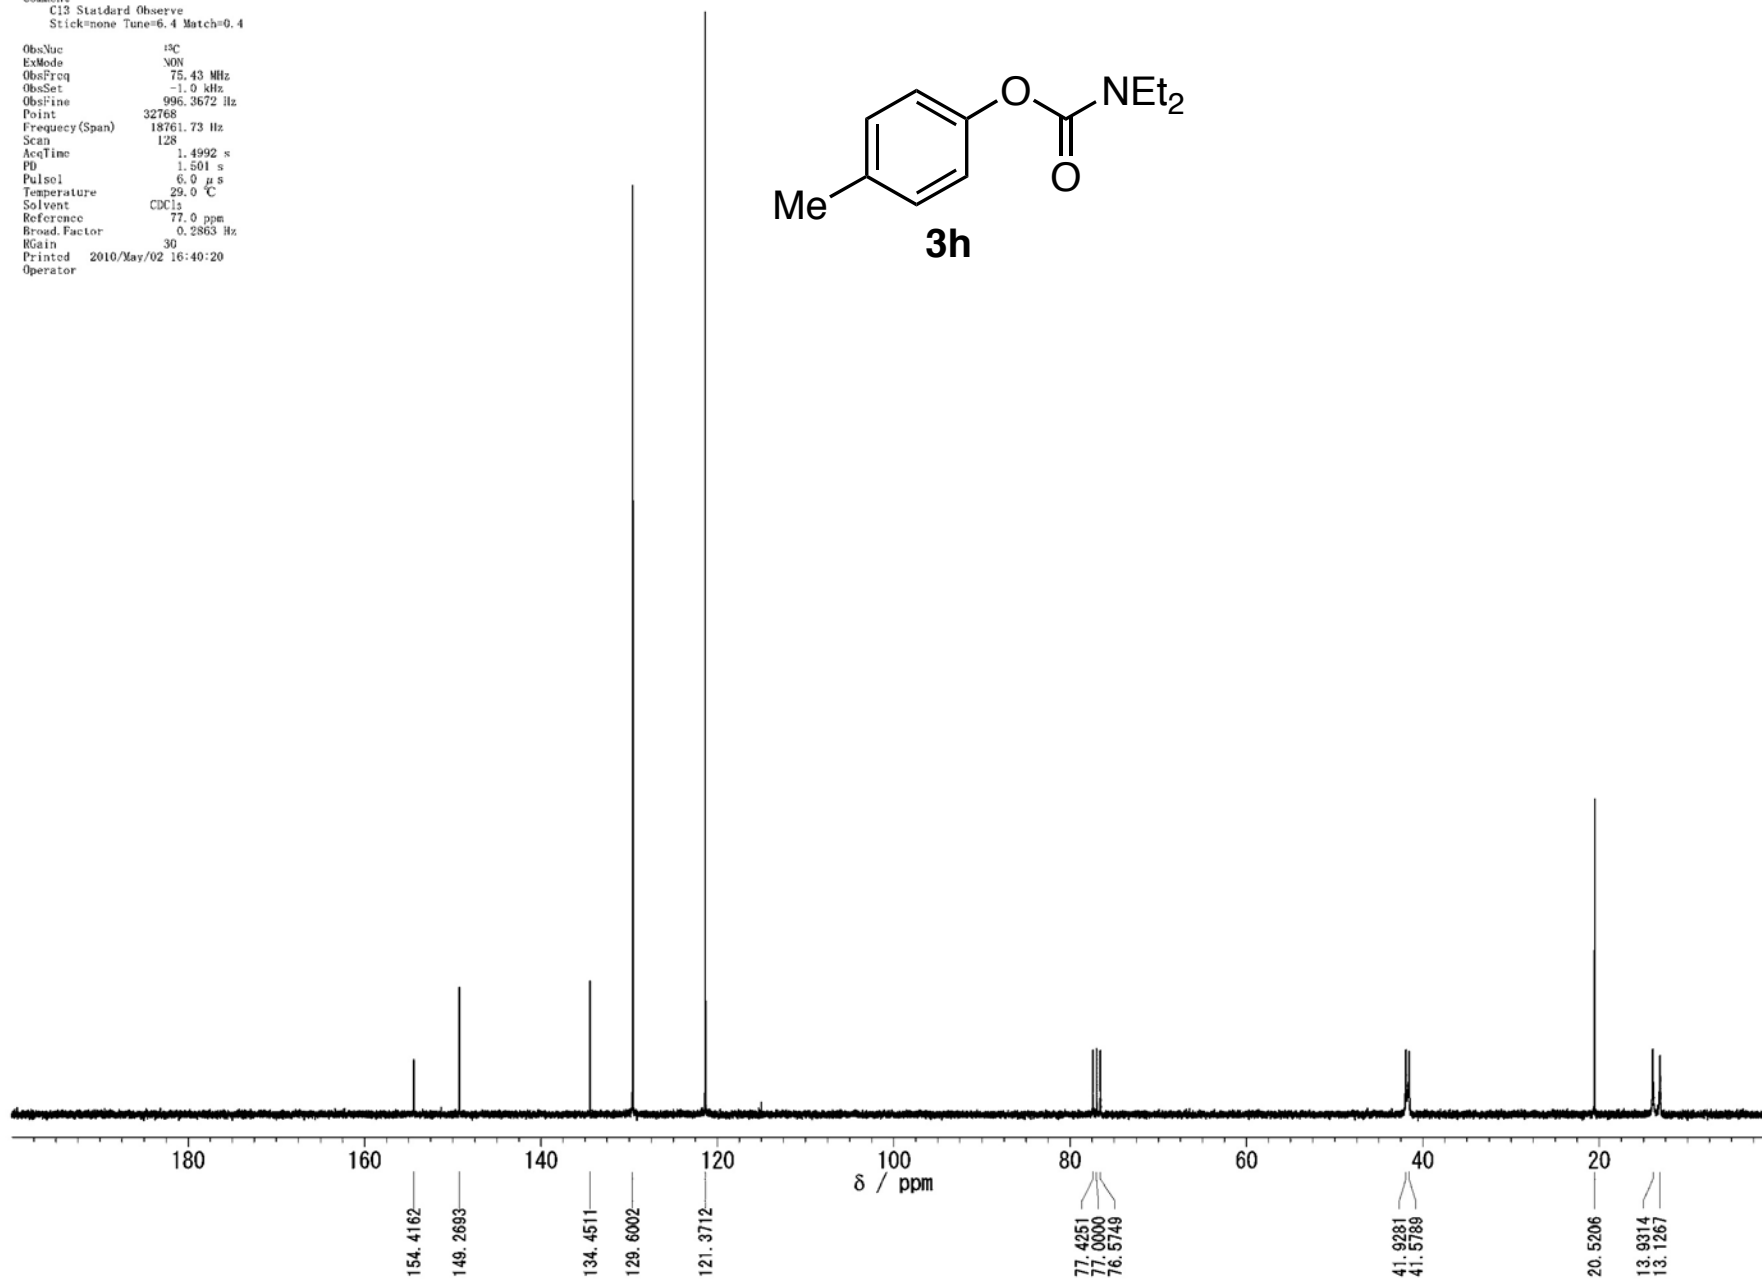

Original File:   
 Date: Sep 30 09   
 Comment: STANDARD 1H OBSERVE   
 ObsNuc: <sup>1</sup>H   
 ExMode: NON   
 ObsFreq: 299.96 MHz   
 ObsSet: 1.0 kHz   
 ObsPine: 995.0047 Hz   
 Point: 16384   
 Frequency (Span): 4500.45 Hz   
 Scan: 16   
 AcqTime: 3.4983 s   
 PD: 1.502 s   
 Pulse1: 6.0 μs   
 Temperature: 29.0 °C   
 Solvent: CDCl<sub>3</sub>   
 Reference: 0.0 ppm   
 Broad. Factor: 0.1373 Hz   
 RGain: 24   
 Printed: 2010/May/14 16:01:13   
 Operator:

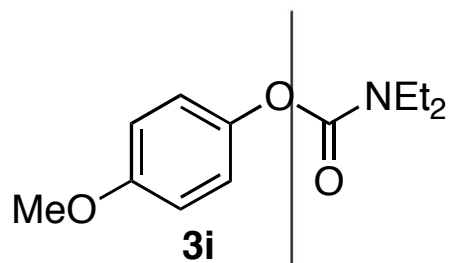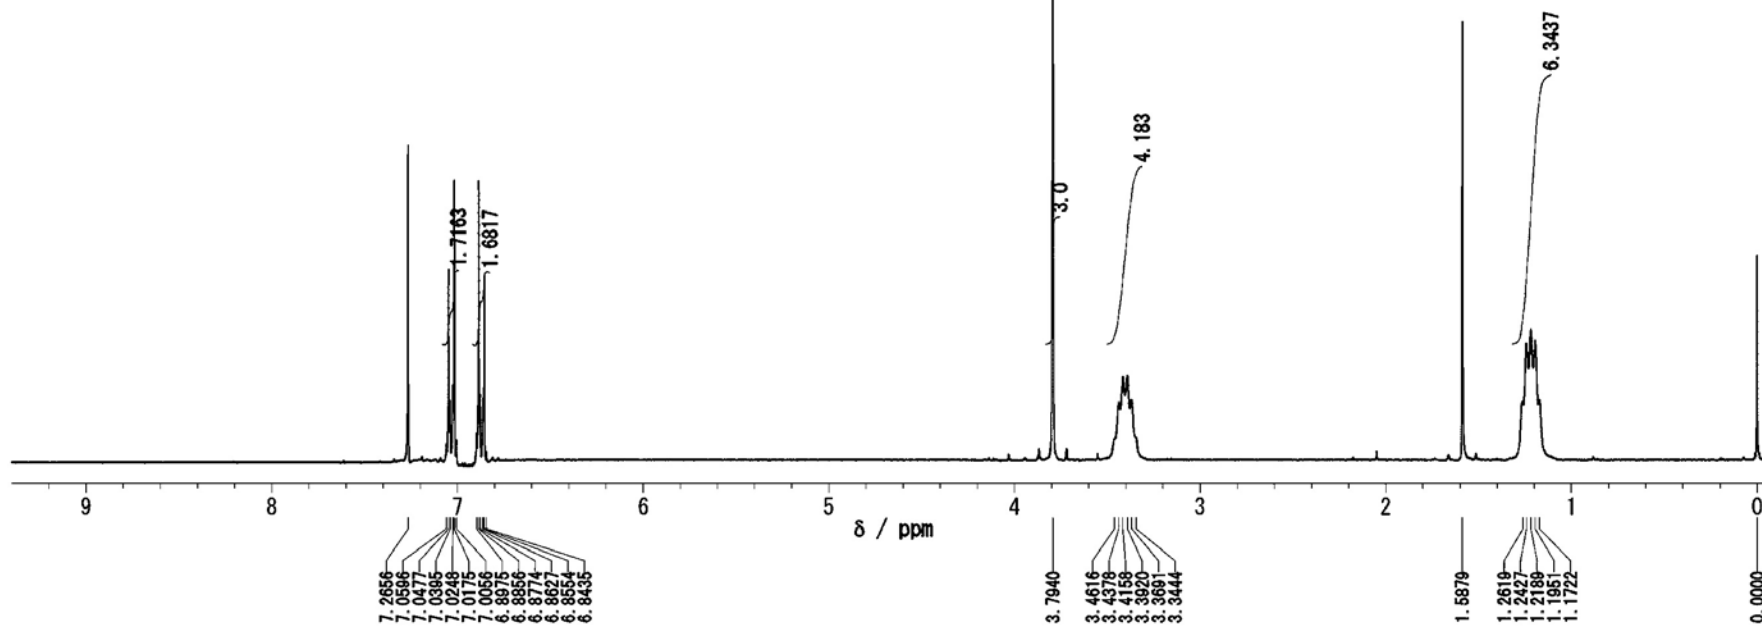

: 13C, FIDV

Comment  
 C13 Standard Observe  
 Stick:none Tune=6.4 Match=0.4  
 ObsNuc 13C  
 ExMode M0N  
 ObsPreq 75.43 MHz  
 ObsSet -1.0 kHz  
 ObsFine 996.3672 Hz  
 Point 32768  
 Frequency (Span) 18761.73 Hz  
 Scan 128  
 AcqTime 1.4992 s  
 PD 1.501 s  
 Pulse1 6.0  $\mu$ s  
 Temperature 29.0  $^{\circ}$ C  
 Solvent CDCl<sub>3</sub>  
 Reference 77.0 ppm  
 Broad.Factor 0.25 Hz  
 RGain 30  
 Printed 2010/May/14 16:04:34  
 Operator

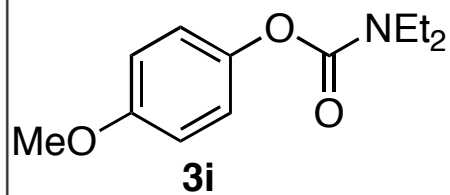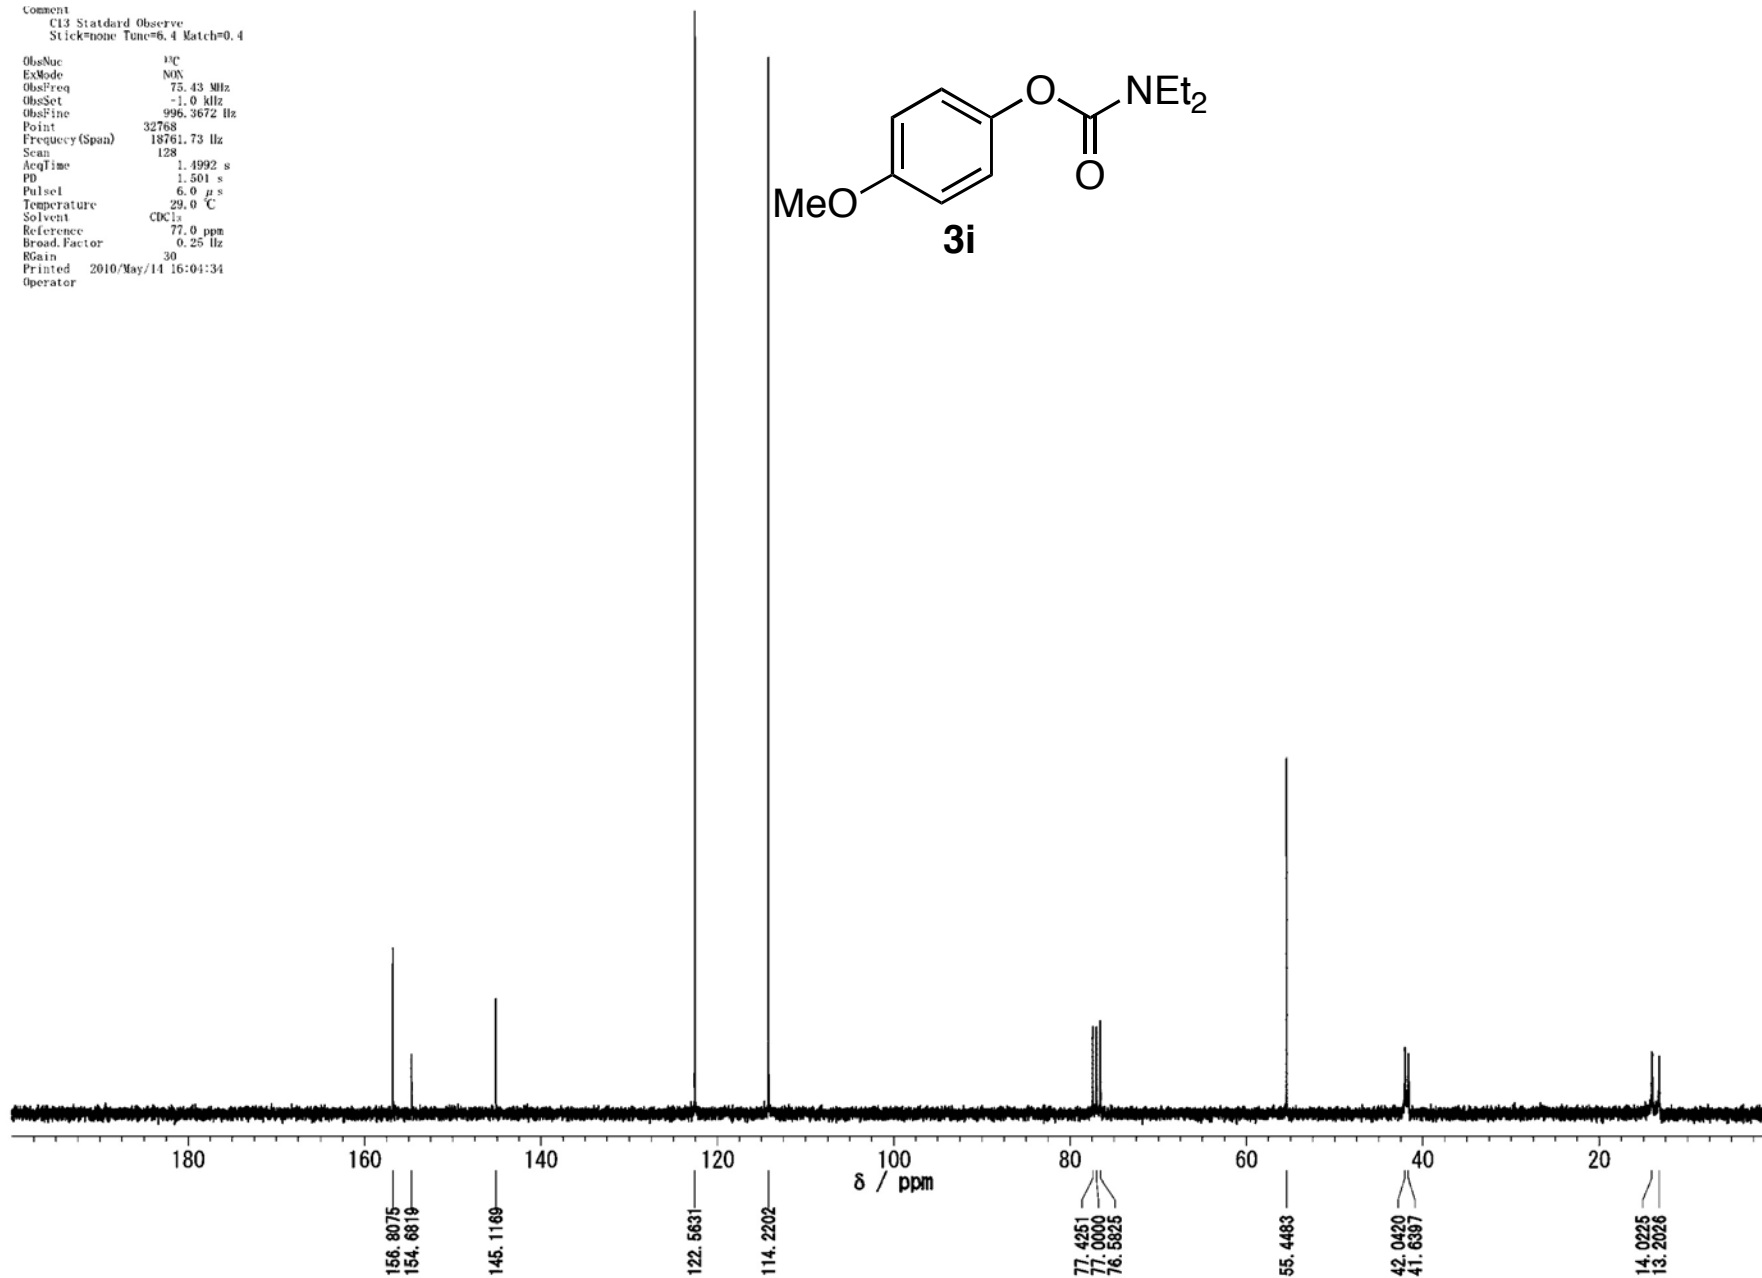

Original File:  
 Date Apr 7 10  
 Comment  
 STANDARD 1H OBSERVE

ObsNuc  $^1\text{H}$   
 ExMode NON  
 ObsPraq 299.96 MHz  
 ObsSet -1.0 kHz  
 ObsPine 995.0017 Hz  
 Point 16384  
 Frequency (Span) 4500.45 Hz  
 Scan 16  
 AcqTime 3.4983 s  
 PD 1.502 s  
 Pulse 6.0  $\mu\text{s}$   
 Temperature 29.0  $^{\circ}\text{C}$   
 Solvent  $\text{CDCl}_3$   
 Reference 0.0 ppm  
 Broad Factor 0.1373 Hz  
 RGain 30  
 Printed 2010/May/02 16:41:56  
 Operator

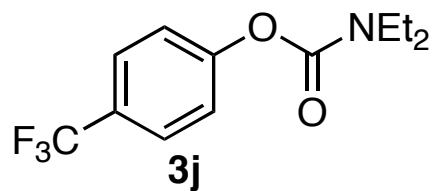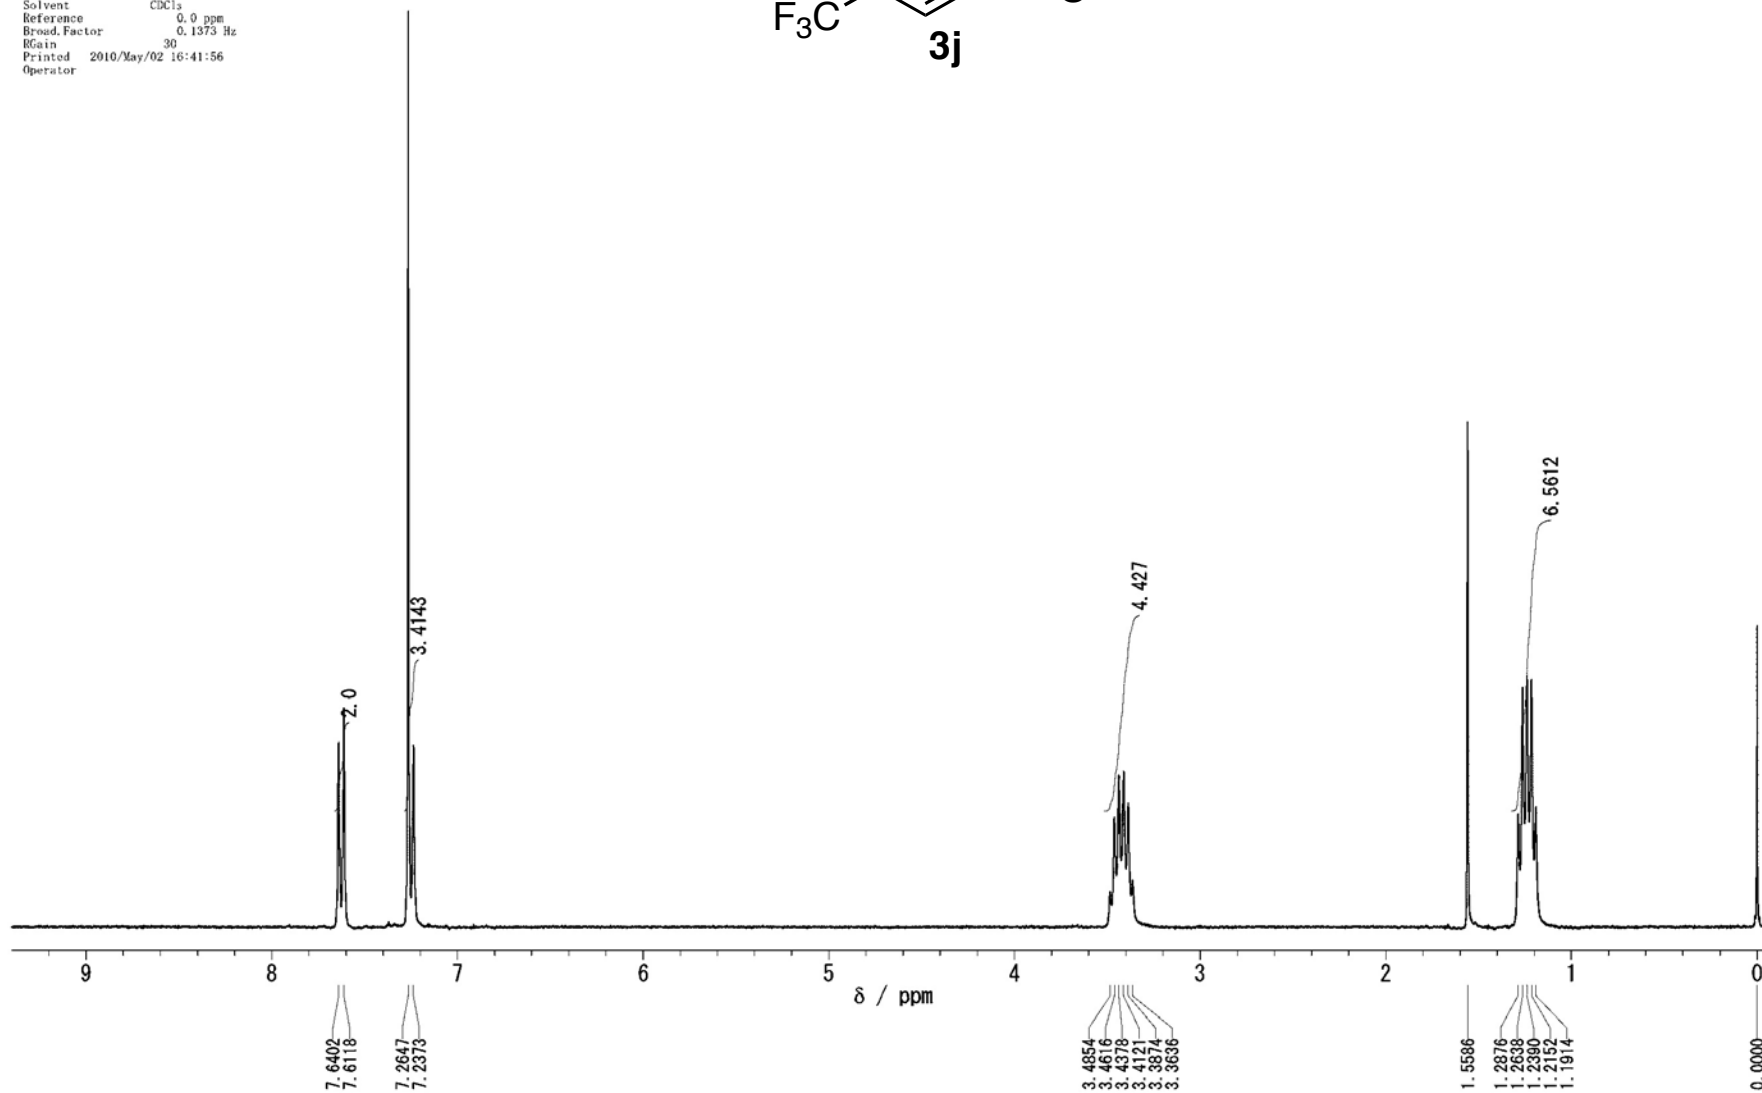

Original File:  
Date Apr 28 10  
Comment  
C13 Standard Observe  
Stick\*none Tune=6.4 Match=0.4

ObsNuc <sup>13</sup>C  
ExMode NOX  
ObsFreq 75.43 MHz  
ObsSet -1.0 kHz  
ObsFine 996.3672 Hz  
Point 32768  
Frequency (Span) 18761.73 Hz  
Scan 256  
AcqTime 1.4992 s  
PD 1.501 s  
Pulse1 6.0 μs  
Temperature 29.0 °C  
Solvent CDCl<sub>3</sub>  
Reference 77.0 ppm  
BroadFactor 0.2863 Hz  
RGain 30  
Printed 2010/Jun/24 14:36:53  
Operator

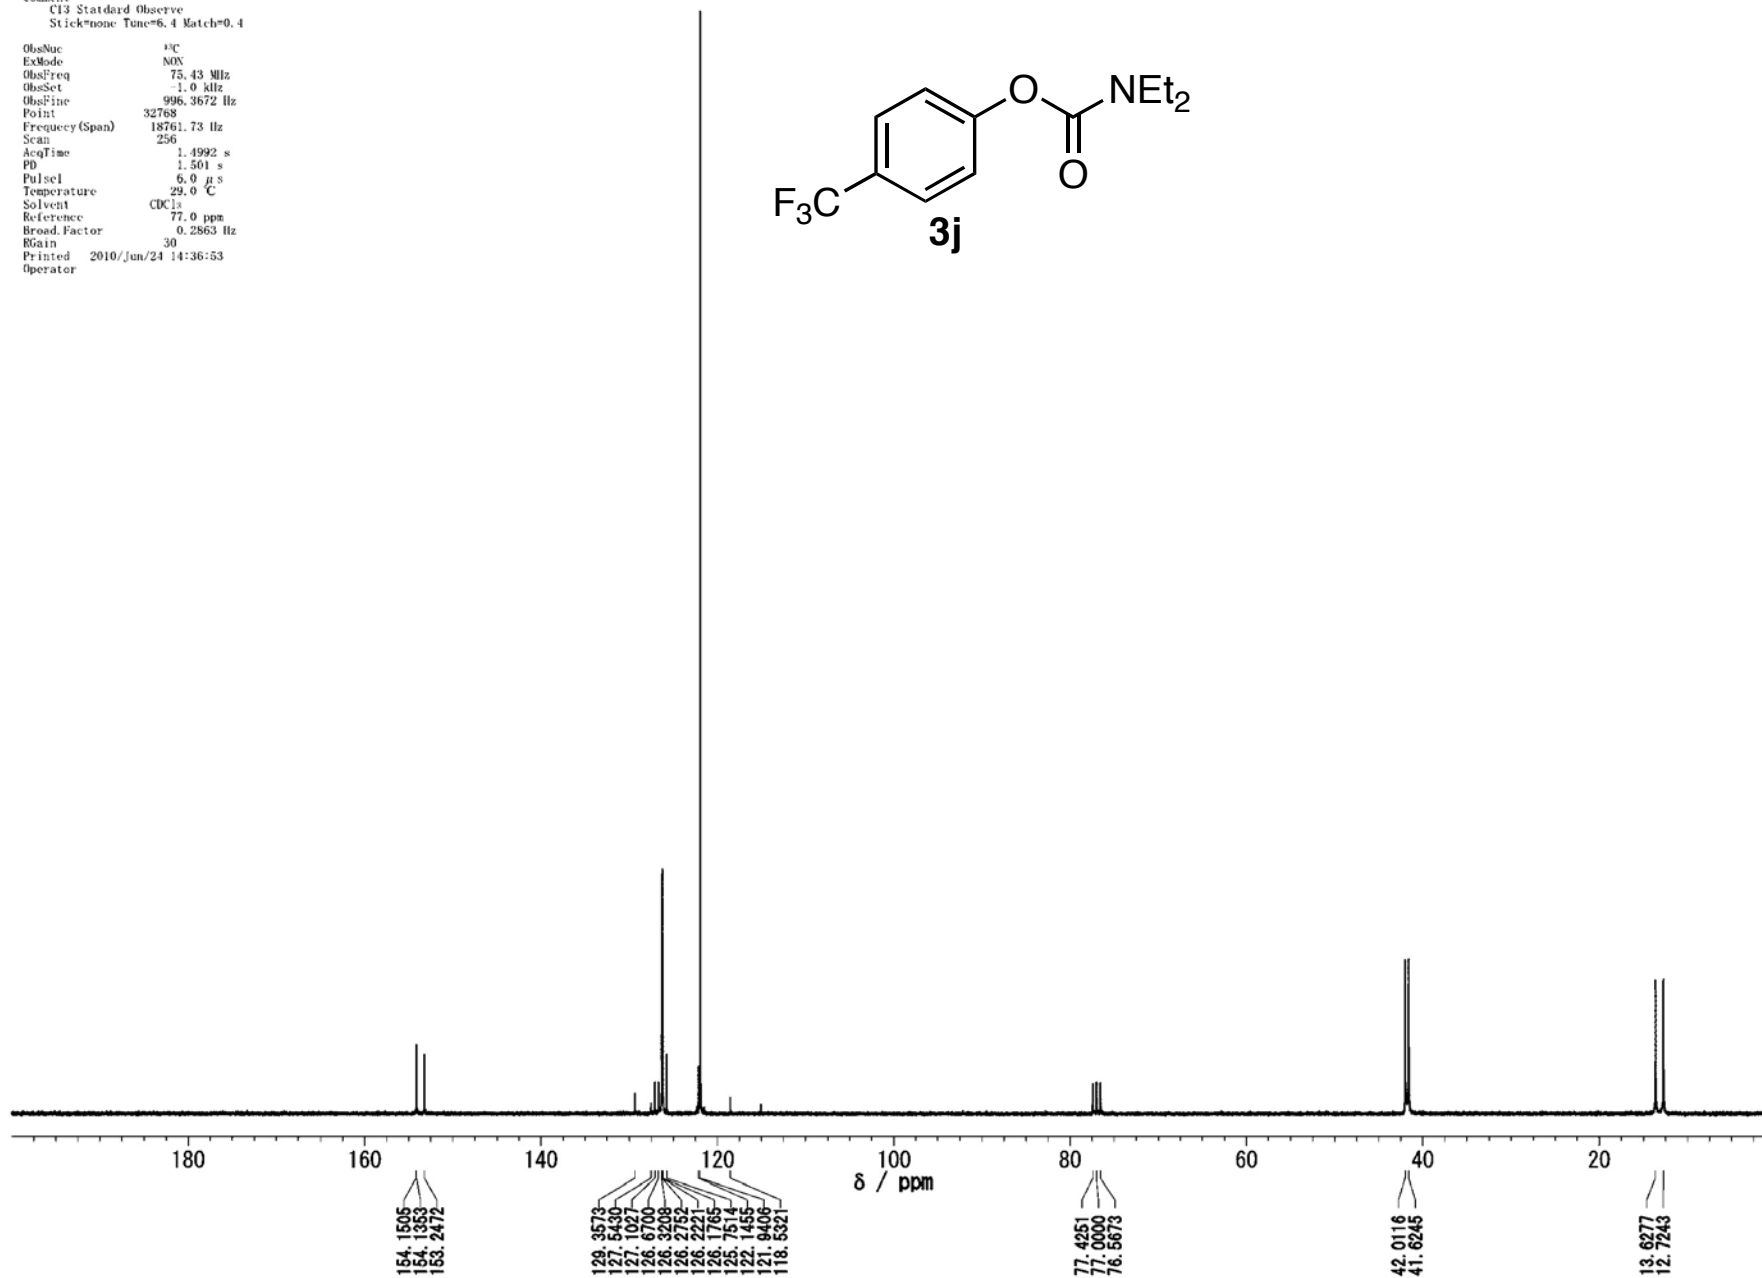

Original File:  
 Date Sep 10 09  
 Comment: STANDARD 1H OBSERVE  
 ObsNuc <sup>1</sup>H  
 ExMode NON  
 ObsPrg 299.96 MHz  
 ObsSet -1.0 kHz  
 ObsPine 995.0017 Hz  
 Point 16384  
 Frequency (Span) 4500.45 Hz  
 Scan 16  
 AcqTime 3.4983 s  
 PD 1.502 s  
 Pulse 6.0  $\mu$ s  
 Temperature 29.0  $^{\circ}$ C  
 Solvent CDCl<sub>3</sub>  
 Reference 0.0 ppm  
 Broad. Factor 0.1373 Hz  
 RGain 24  
 Printed 2010/May/02 16:45:25  
 Operator

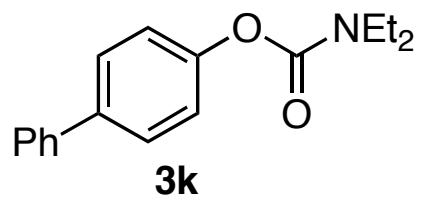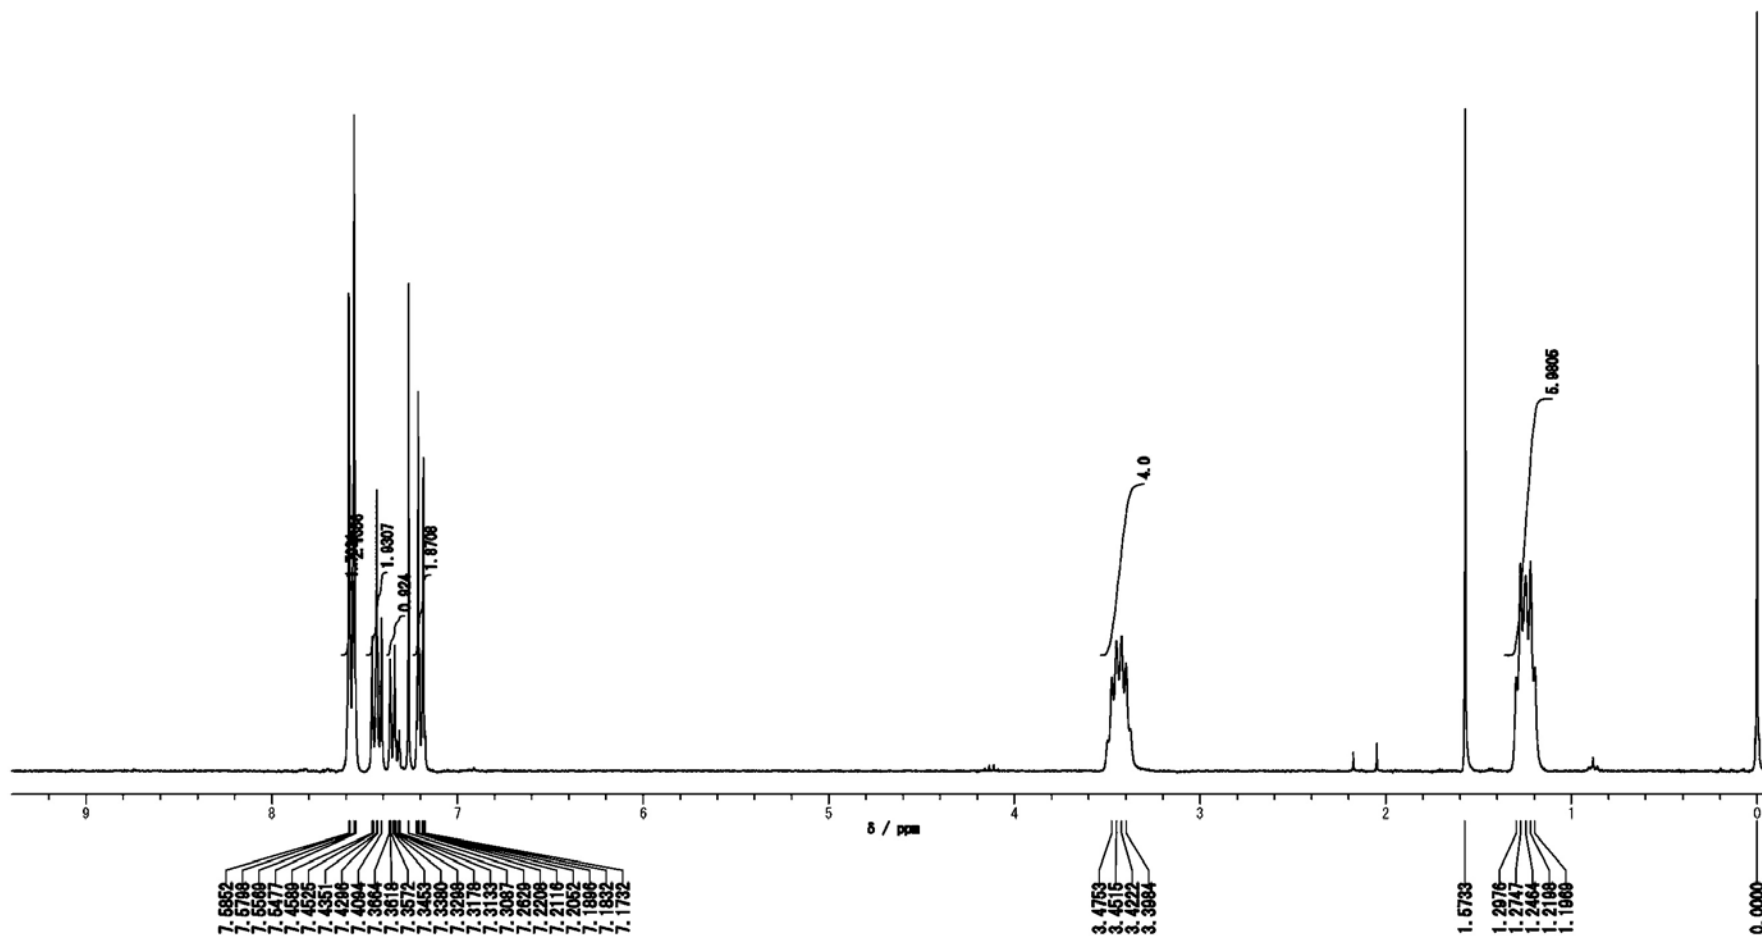

Original File:  
 Date Mar 6 10  
 Comment  
 C13 Standard Observe  
 Stick=none Tune=6.4 Match=0.4

ObsNuc  $^{13}\text{C}$   
 ExMode NON  
 ObsFreq 75.43 MHz  
 ObsSet -1.0 kHz  
 ObsFino 996.3672 Hz  
 Point 32768  
 Frequency(Span) 18761.73 Hz  
 Scan 128  
 AcqTime 1.4992 s  
 PD 1.501 s  
 Pulsel 6.0  $\mu\text{s}$   
 Temperature 29.0  $^{\circ}\text{C}$   
 Solvent  $\text{CDCl}_3$   
 Reference 77.0 ppm  
 Broad.Factor 0.2863 Hz  
 RGain 30  
 Printed 2010/May/02 16:46:56  
 Operator

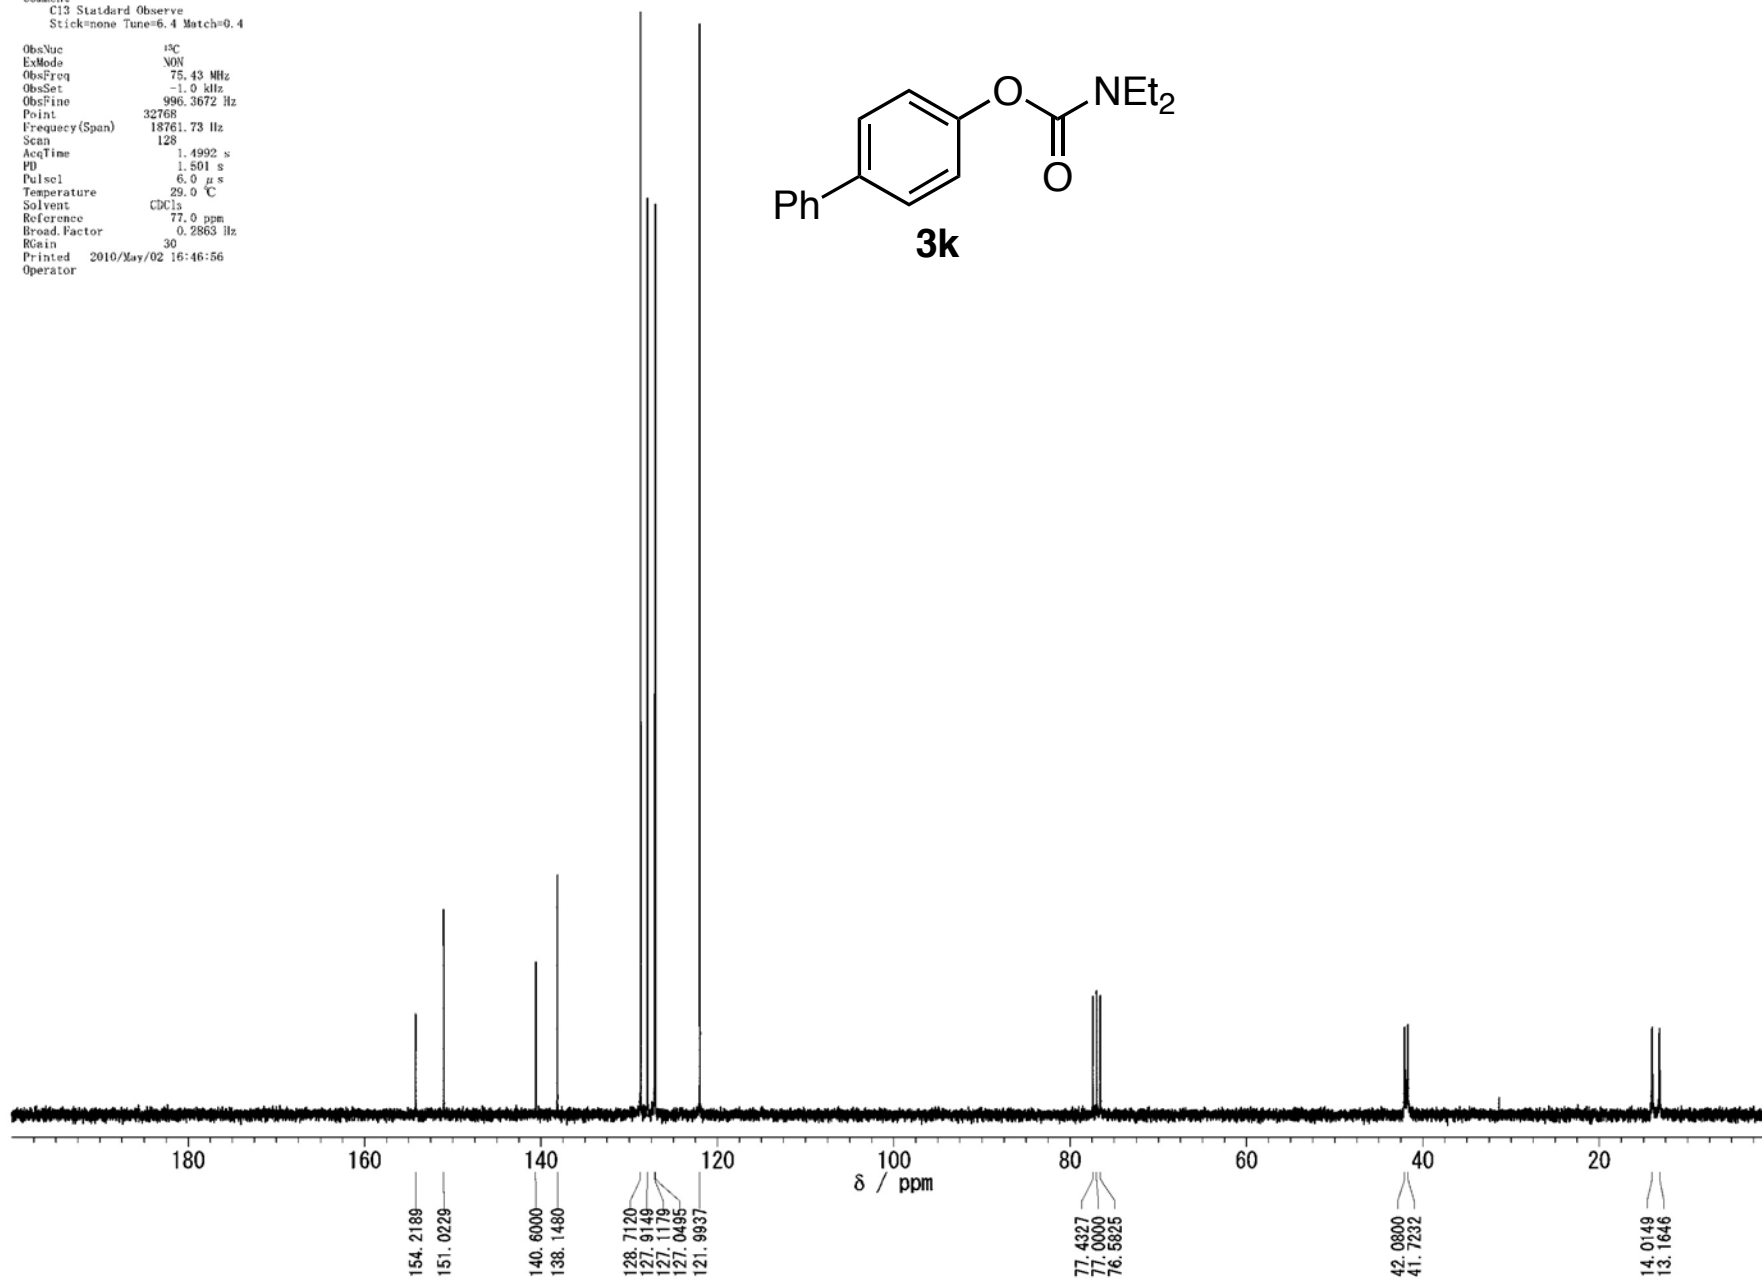

Original File: jun 6 09  
 Date: jun 6 09  
 Comment: STANDARD 1H OBSERVE  
 ObsNuc: <sup>1</sup>H  
 ExMode: NON  
 ObsFreq: 299.96 MHz  
 ObsSet: 1.0 kHz  
 ObsPine: 995.0047 Hz  
 Point: 16384  
 Frequency (Span): 4500.45 Hz  
 Scan: 16  
 AcqTime: 3.4983 s  
 PD: 1.502 s  
 Pulse1: 6.0  $\mu$ s  
 Temperature: 29.0  $^{\circ}$ C  
 Solvent: CDCl<sub>3</sub>  
 Reference: 0.0 ppm  
 Broad. Factor: 0.1373 Hz  
 RGain: 19  
 Printed: 2010/May/14 15:02:58  
 Operator:

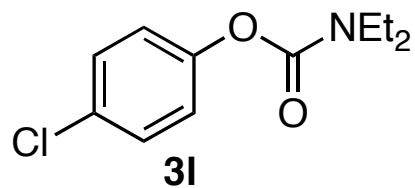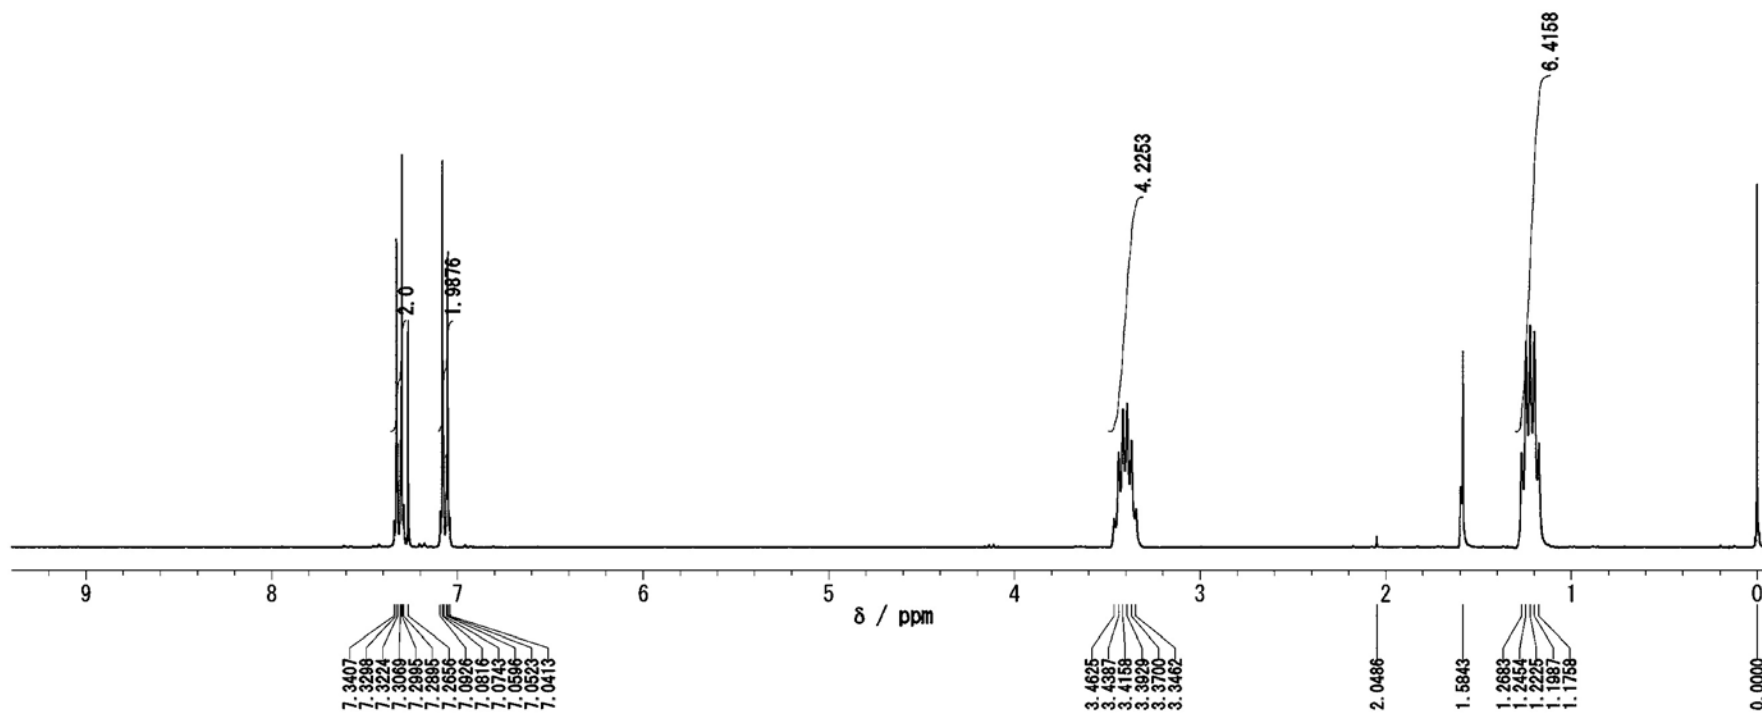



Original File: Mar 5 10  
 Date  
 Comment  
 C13 Standard Observe  
 Stick\*none Tune=6.4 Match=0.4

ObsNuc <sup>13</sup>C  
 ExMode NOX  
 ObsFreq 75.43 MHz  
 ObsSet 1.0 kHz  
 ObsFine 996.3672 Hz  
 Point 32768  
 Frequency (Span) 18761.73 Hz  
 Scan 192  
 AcqTime 1.4992 s  
 PD 1.501 s  
 Pulse1 6.0  $\mu$ s  
 Temperature 29.0  $^{\circ}$ C  
 Solvent CDCl<sub>3</sub>  
 Reference 77.0 ppm  
 Broad.Factor 0.2863 Hz  
 RGain 30  
 Printed 2010/May/14 15:30:37  
 Operator

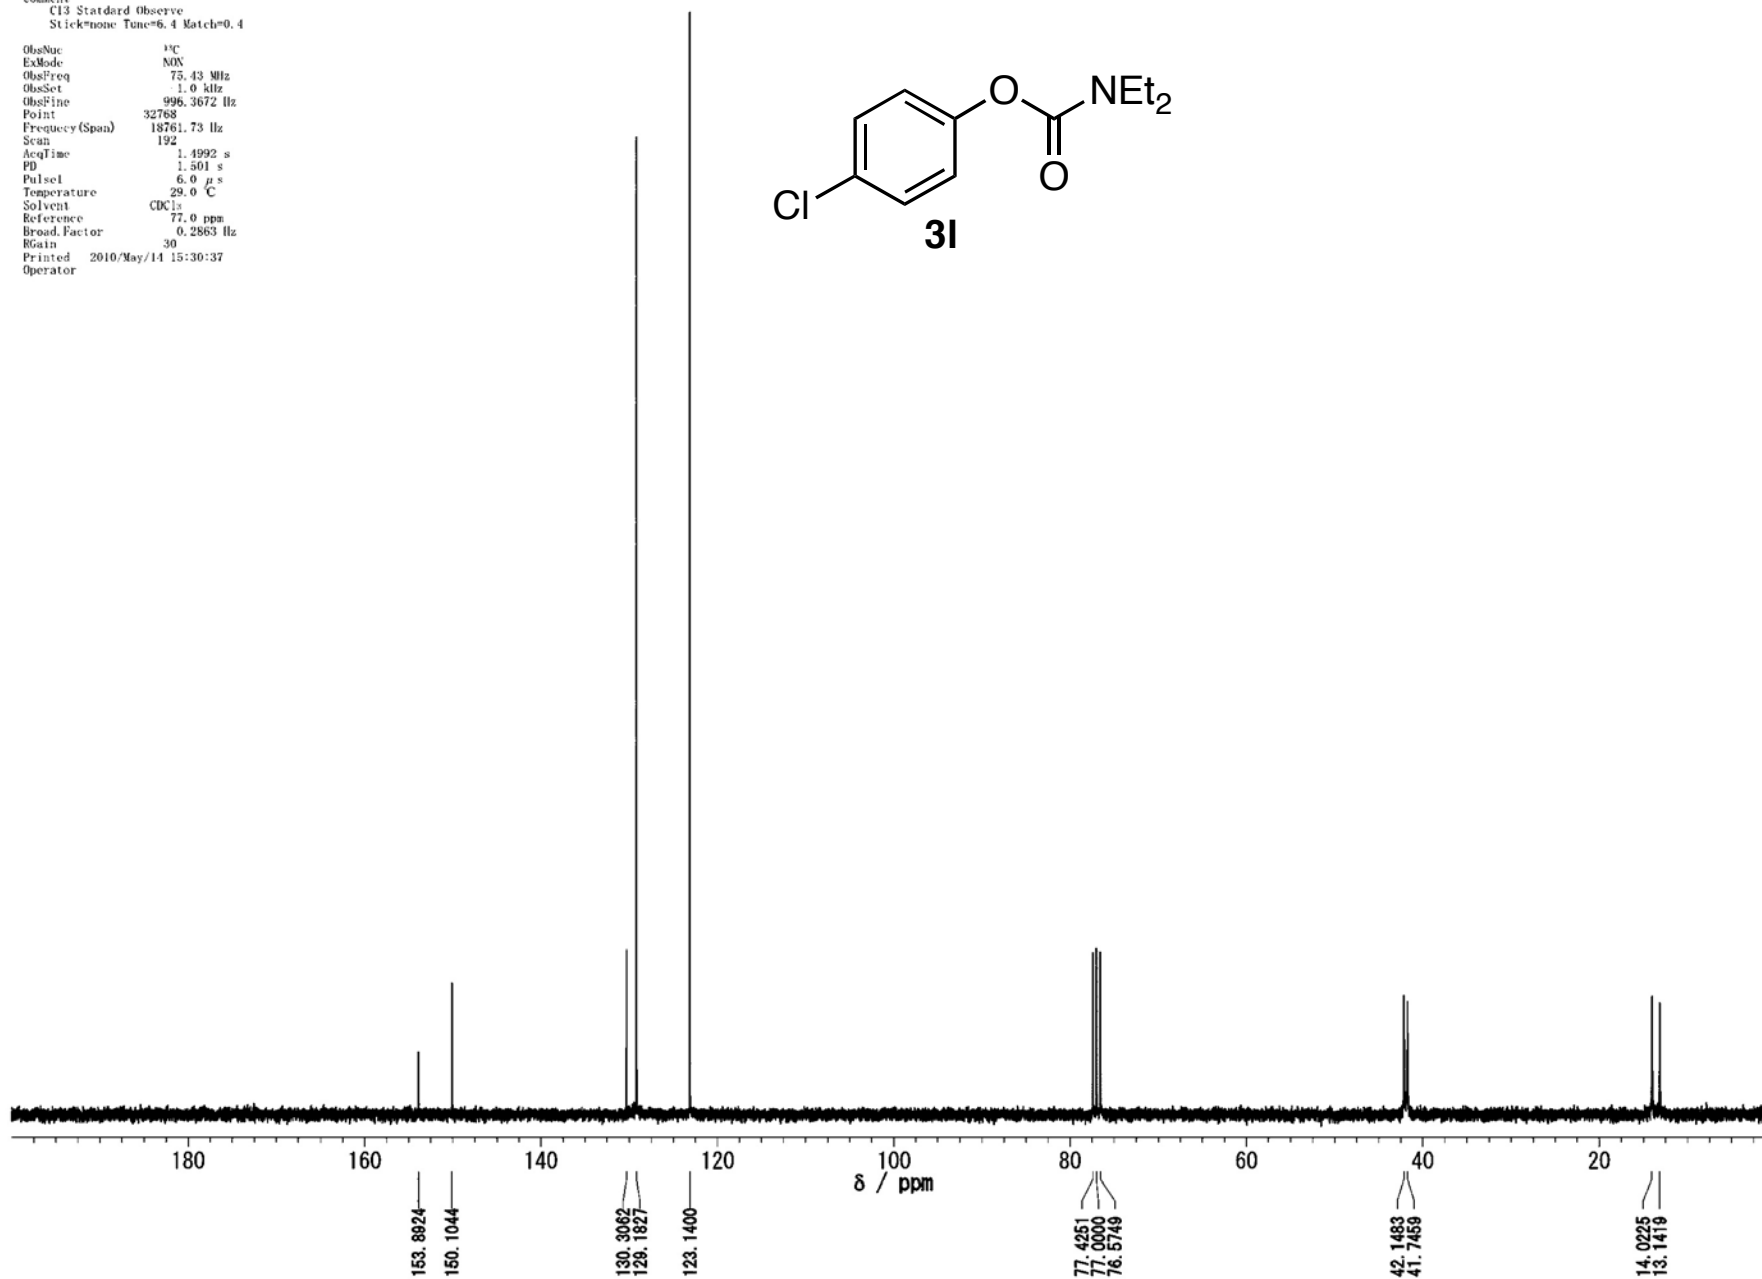

Original File:  
Date Nov 13 09  
Comment  
STANDARD 1H OBSERVE

ObsNuc  $^1\text{H}$   
ExMode NON  
ObsFreq 299.96 MHz  
ObsSet 1.0 kHz  
ObsPine 995.0047 Hz  
Point 16384  
Frequency (Span) 4500.45 Hz  
Scan 16  
AcqTime 3.4983 s  
PD 1.502 s  
Pulse 6.0  $\mu\text{s}$   
Temperature 29.0  $^{\circ}\text{C}$   
Solvent  $\text{CDCl}_3$   
Reference 0.0 ppm  
Broad. Factor 0.1373 Hz  
RGain 24  
Printed 2010/May/14 15:07:49  
Operator

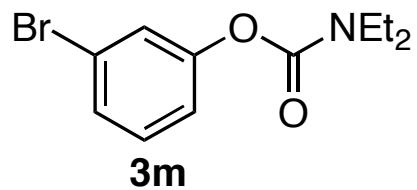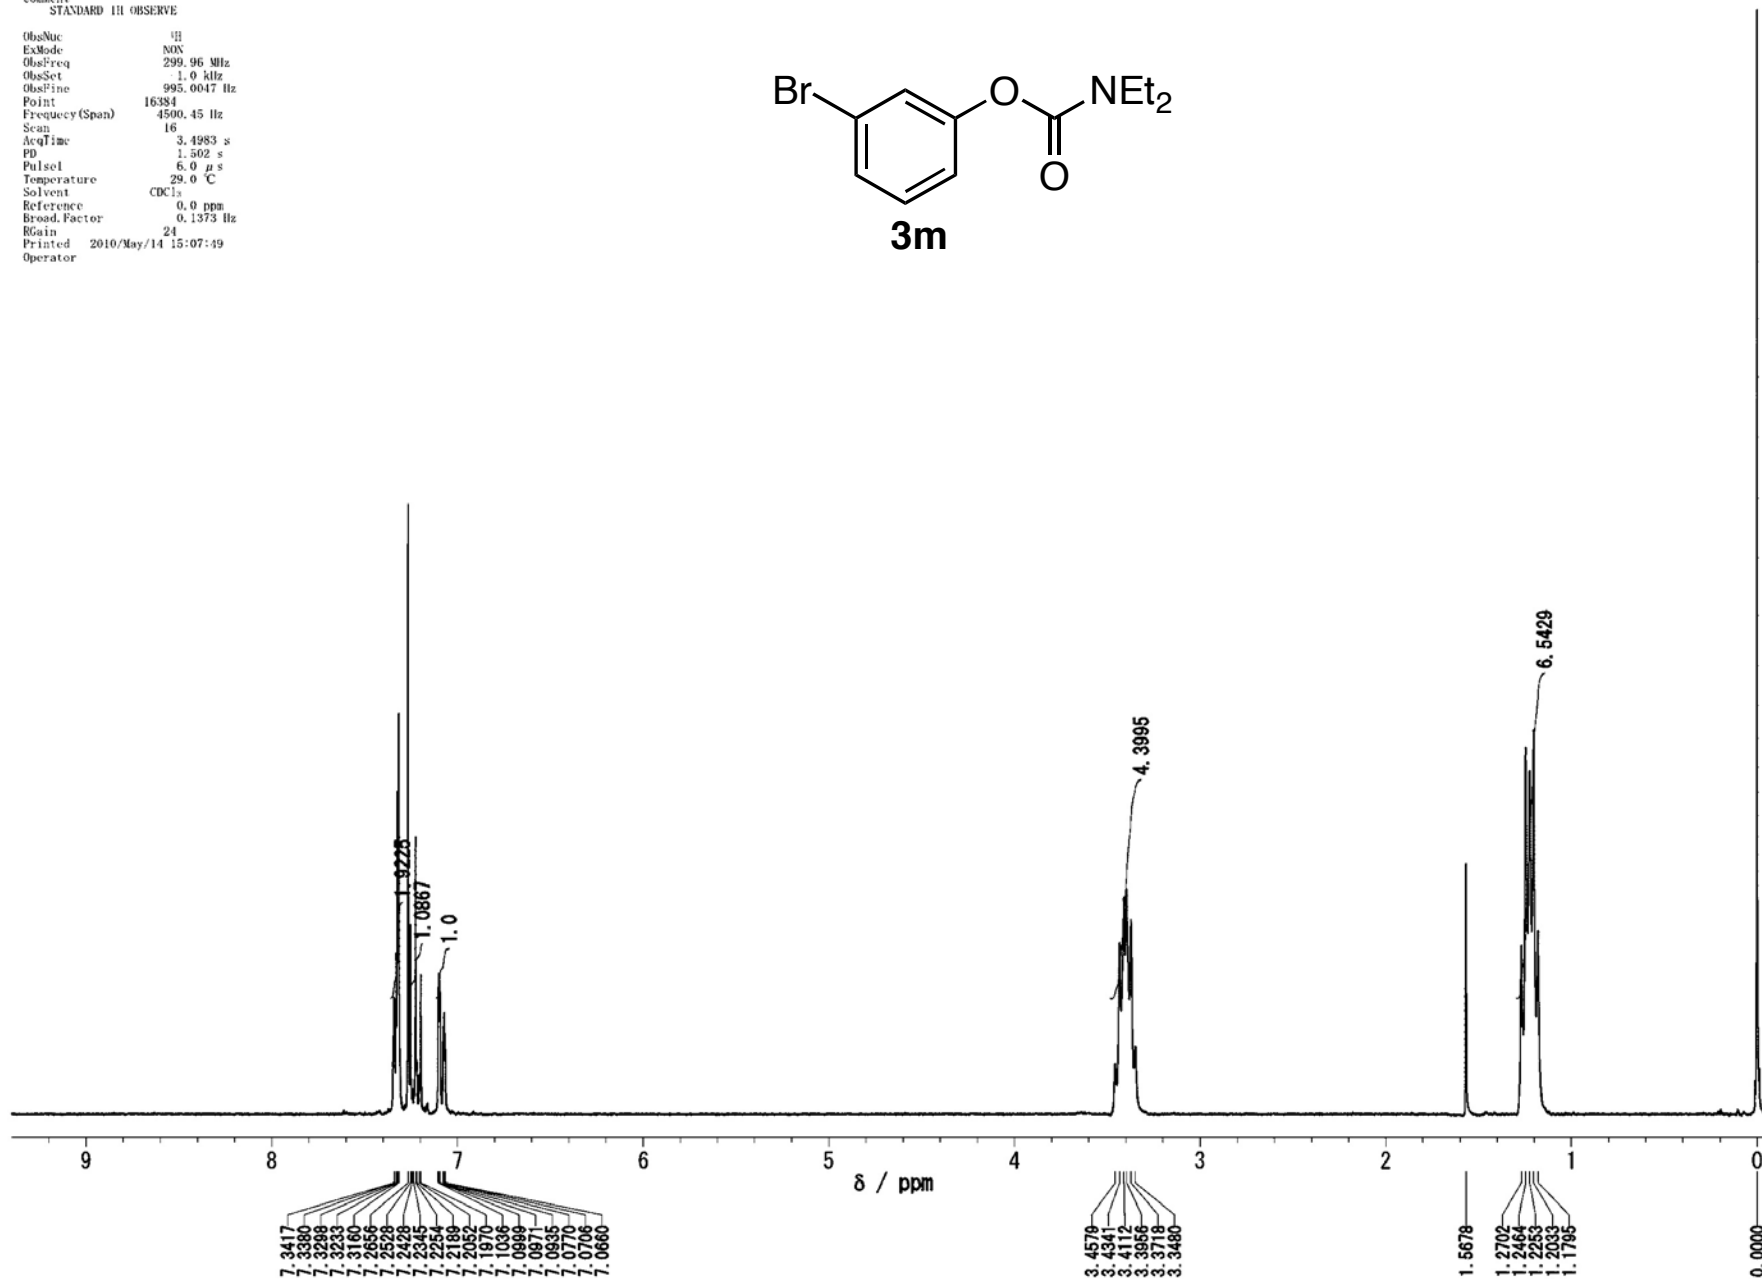

Original File: Mar 5 10  
 Date  
 Comment  
 C13 Standard Observe  
 Stick\*none Tune=6.4 Match=0.4

ObsNuc <sup>13</sup>C  
 ExMode NOX  
 ObsFreq 75.43 MHz  
 ObsSet 1.0 kHz  
 ObsFine 996.3672 Hz  
 Point 32768  
 Frequency (Span) 18761.73 Hz  
 Scan 128  
 AcqTime 1.4992 s  
 PD 1.501 s  
 Pulse1 6.0  $\mu$ s  
 Temperature 29.0  $^{\circ}$ C  
 Solvent CDCl<sub>3</sub>  
 Reference 77.0 ppm  
 Broad.Factor 0.2863 Hz  
 RGain 30  
 Printed 2010/May/14 15:32:38  
 Operator

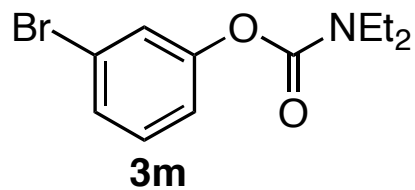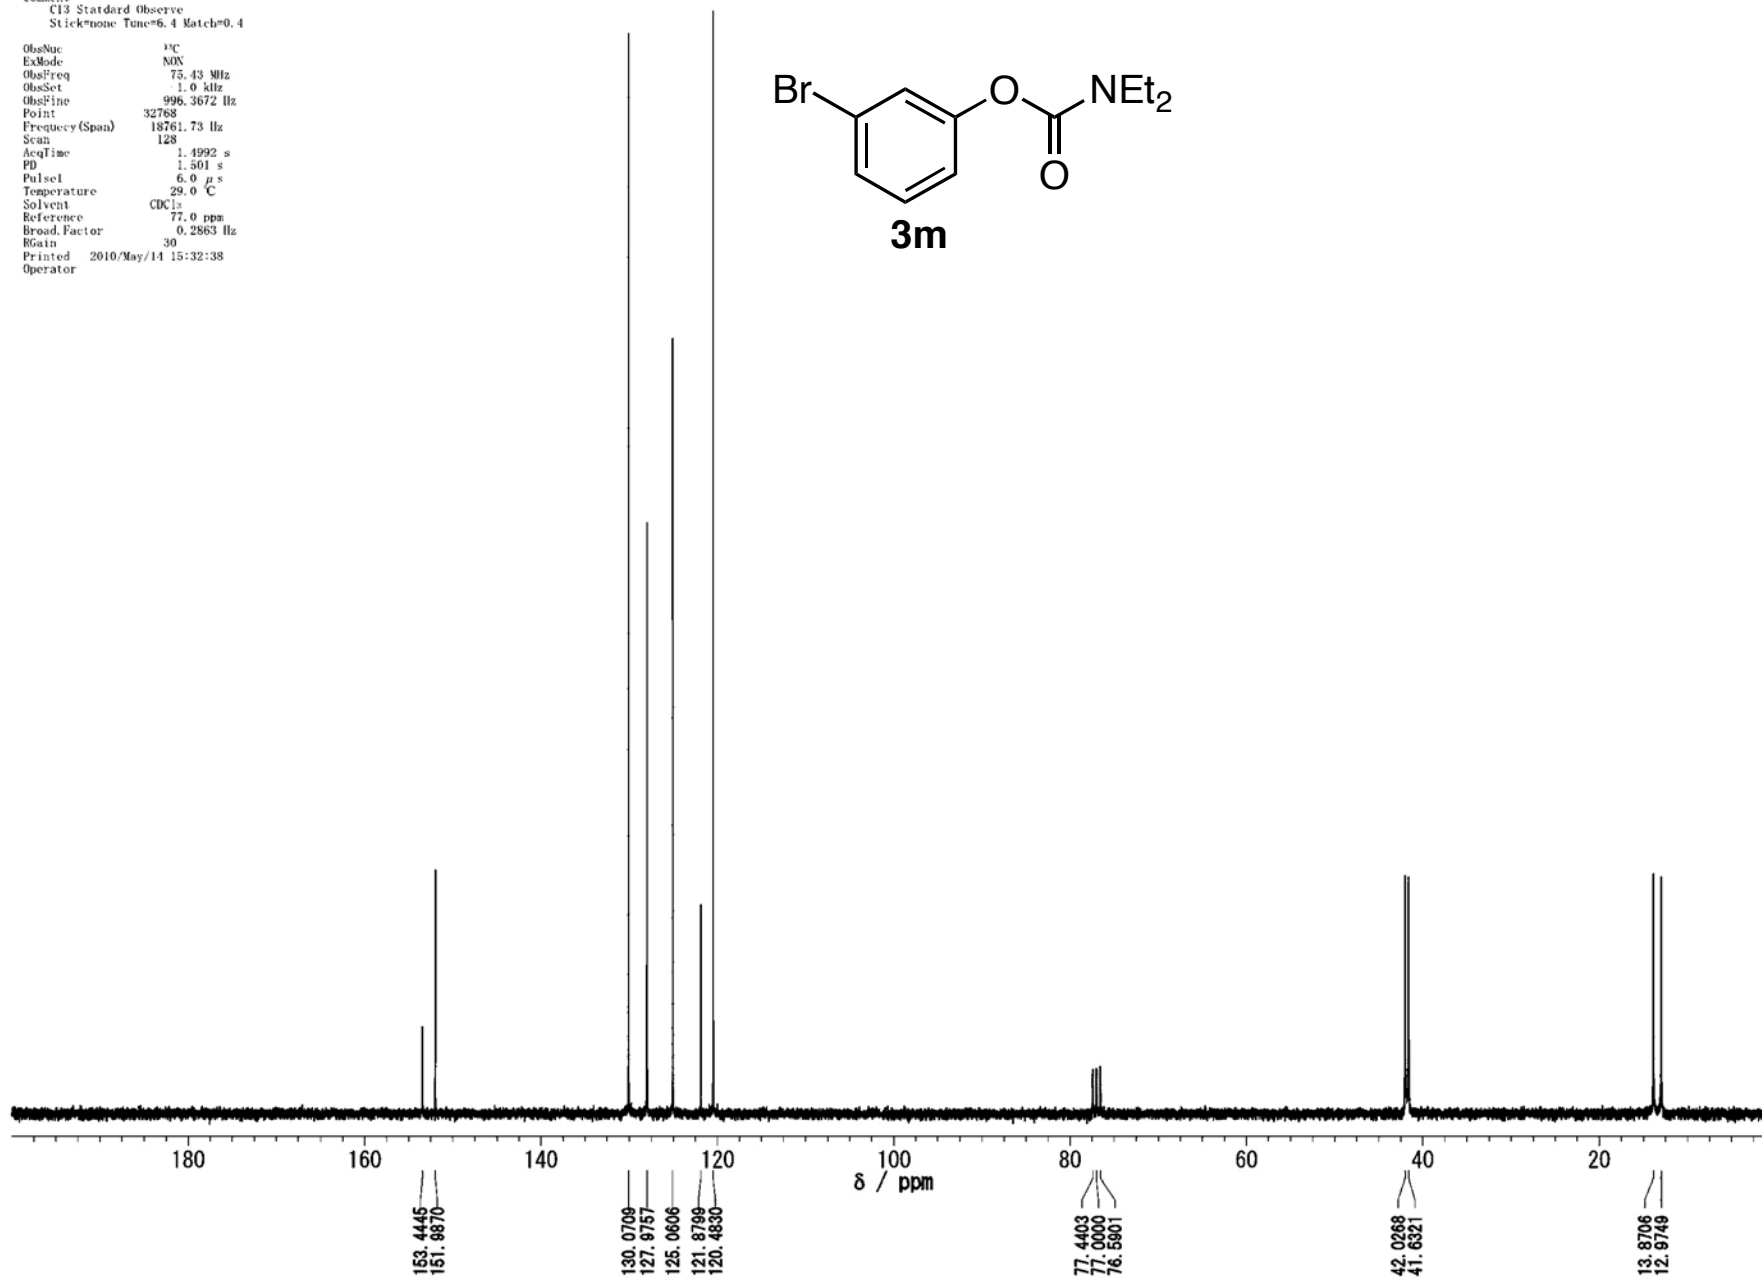

Original File:   
 Date: Jun 18 09   
 Comment: STANDARD 1H OBSERVE

ObsNuc: <sup>1</sup>H   
 ExMode: NOX   
 ObsFreq: 299.96 MHz   
 ObsSet: 1.0 kHz   
 ObsPine: 995.0047 Hz   
 Point: 16384   
 Frequency (Span): 4500.45 Hz   
 Scan: 16   
 AcqTime: 3.4983 s   
 PD: 1.502 s   
 Pulse: 6.0  $\mu$ s   
 Temperature: 29.0  $^{\circ}$ C   
 Solvent: CDCl<sub>3</sub>   
 Reference: 0.0 ppm   
 Broad. Factor: 0.1373 Hz   
 RGain: 28   
 Printed: 2010/Jun/23 10:03:15   
 Operator:

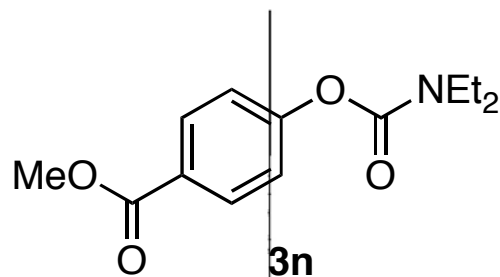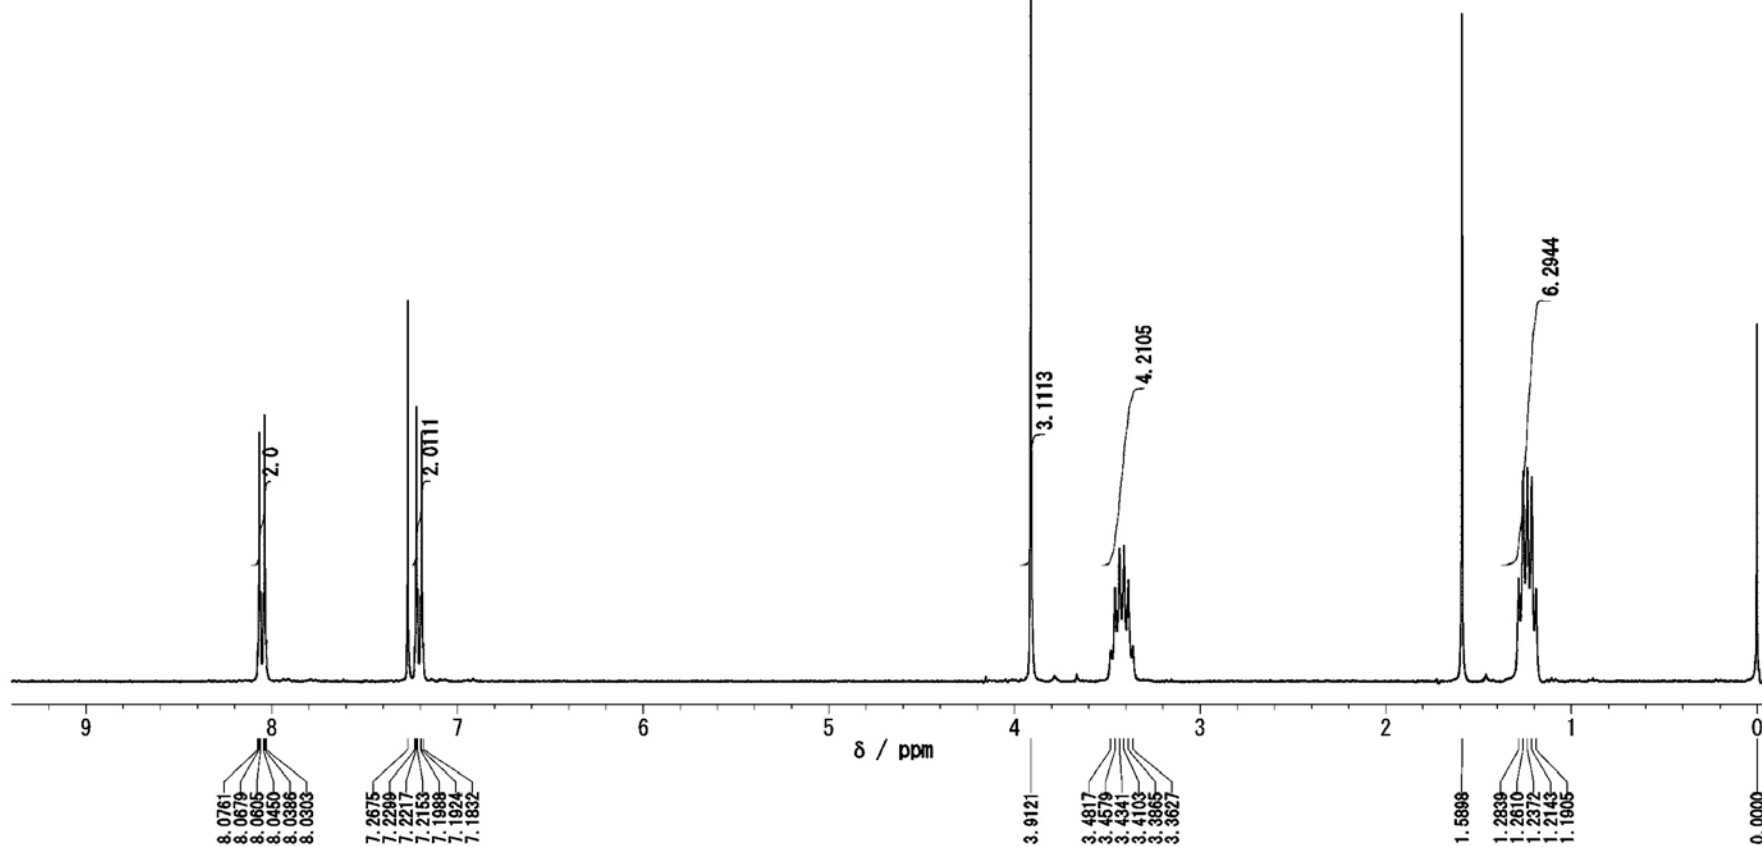

Original File: jun 22 10  
 Date: jun 22 10  
 Comment: C13 Standard Observe  
 Stick\*none Tune=6.4 Match=0.4

ObsNuc:  $^{13}\text{C}$   
 ExMode: NOX  
 ObsFreq: 75.43 MHz  
 ObsSet: -1.0 kHz  
 ObsFine: 996.3672 Hz  
 Point: 32768  
 Frequency (Span): 18761.73 Hz  
 Scan: 64  
 AcqTime: 1.4992 s  
 PD: 1.501 s  
 Pulse1: 6.0  $\mu\text{s}$   
 Temperature: 29.0  $^{\circ}\text{C}$   
 Solvent:  $\text{CDCl}_3$   
 Reference: 77.0 ppm  
 Broad\_Factor: 0.2863 Hz  
 RGain: 30  
 Printed: 2010/jun/23 10:05:57  
 Operator:

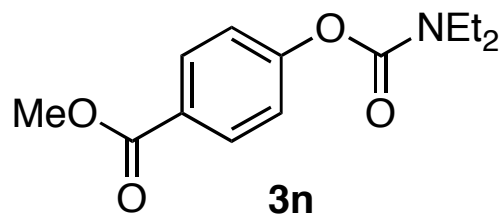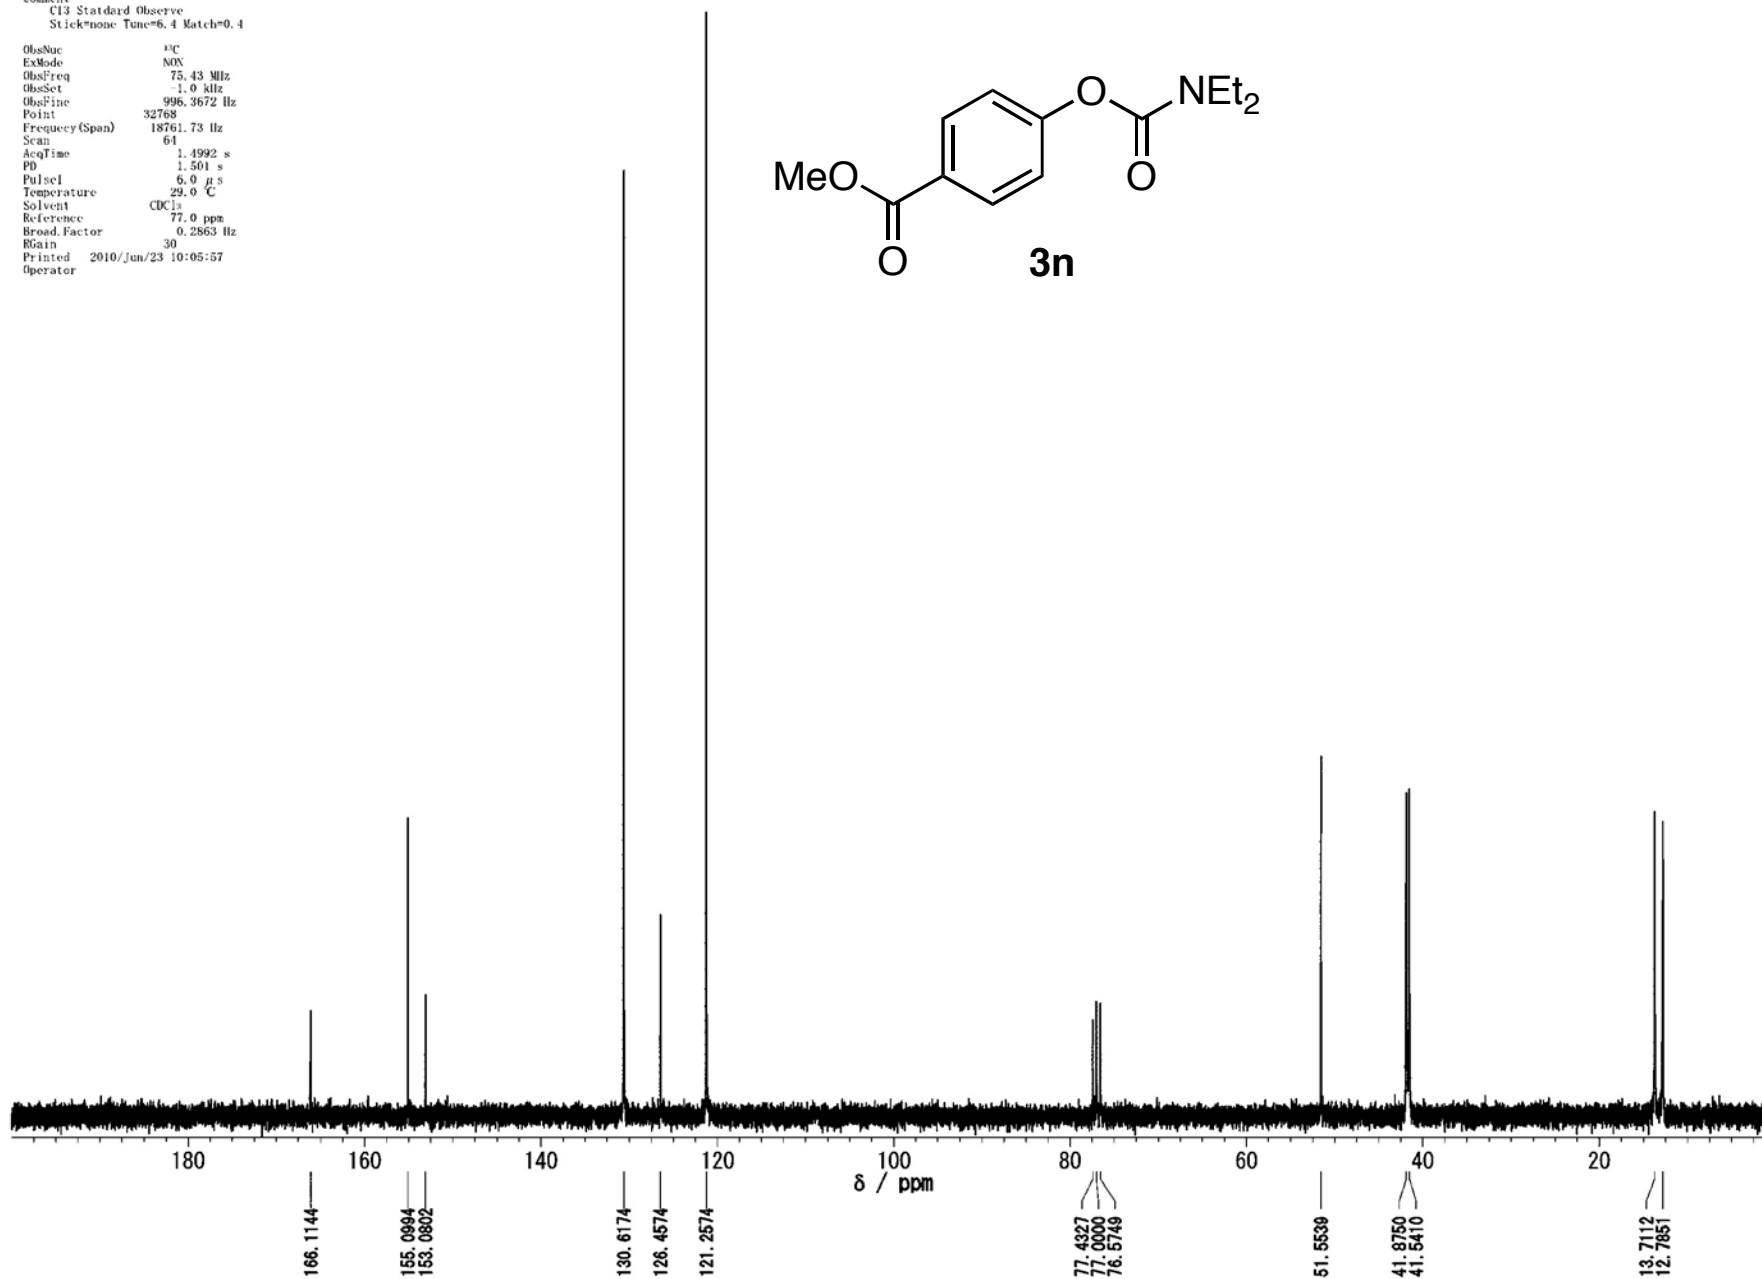

Original File:  
Date Dec 16 09  
Comment  
STANDARD 1H OBSERVE

ObsNuc  $^1\text{H}$   
ExMode NON  
ObsPraq 299.96 MHz  
ObsSot -1.0 kHz  
ObsPine 995.0017 Hz  
Point 16384  
Frequency (Span) 4500.45 Hz  
Scan 16  
AcqTime 3.4983 s  
PD 1.502 s  
Pulse1 6.0  $\mu\text{s}$   
Temperature 29.0  $^{\circ}\text{C}$   
Solvent  $\text{CDCl}_3$   
Reference 0.0 ppm  
Broad Factor 0.1373 Hz  
RGain 26  
Printed 2010/May/02 16:49:41  
Operator

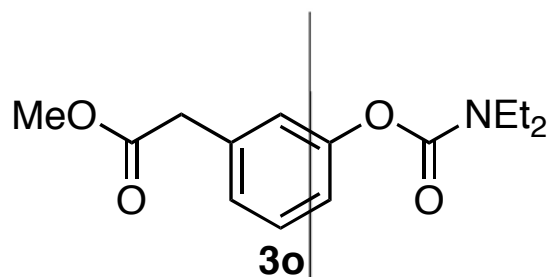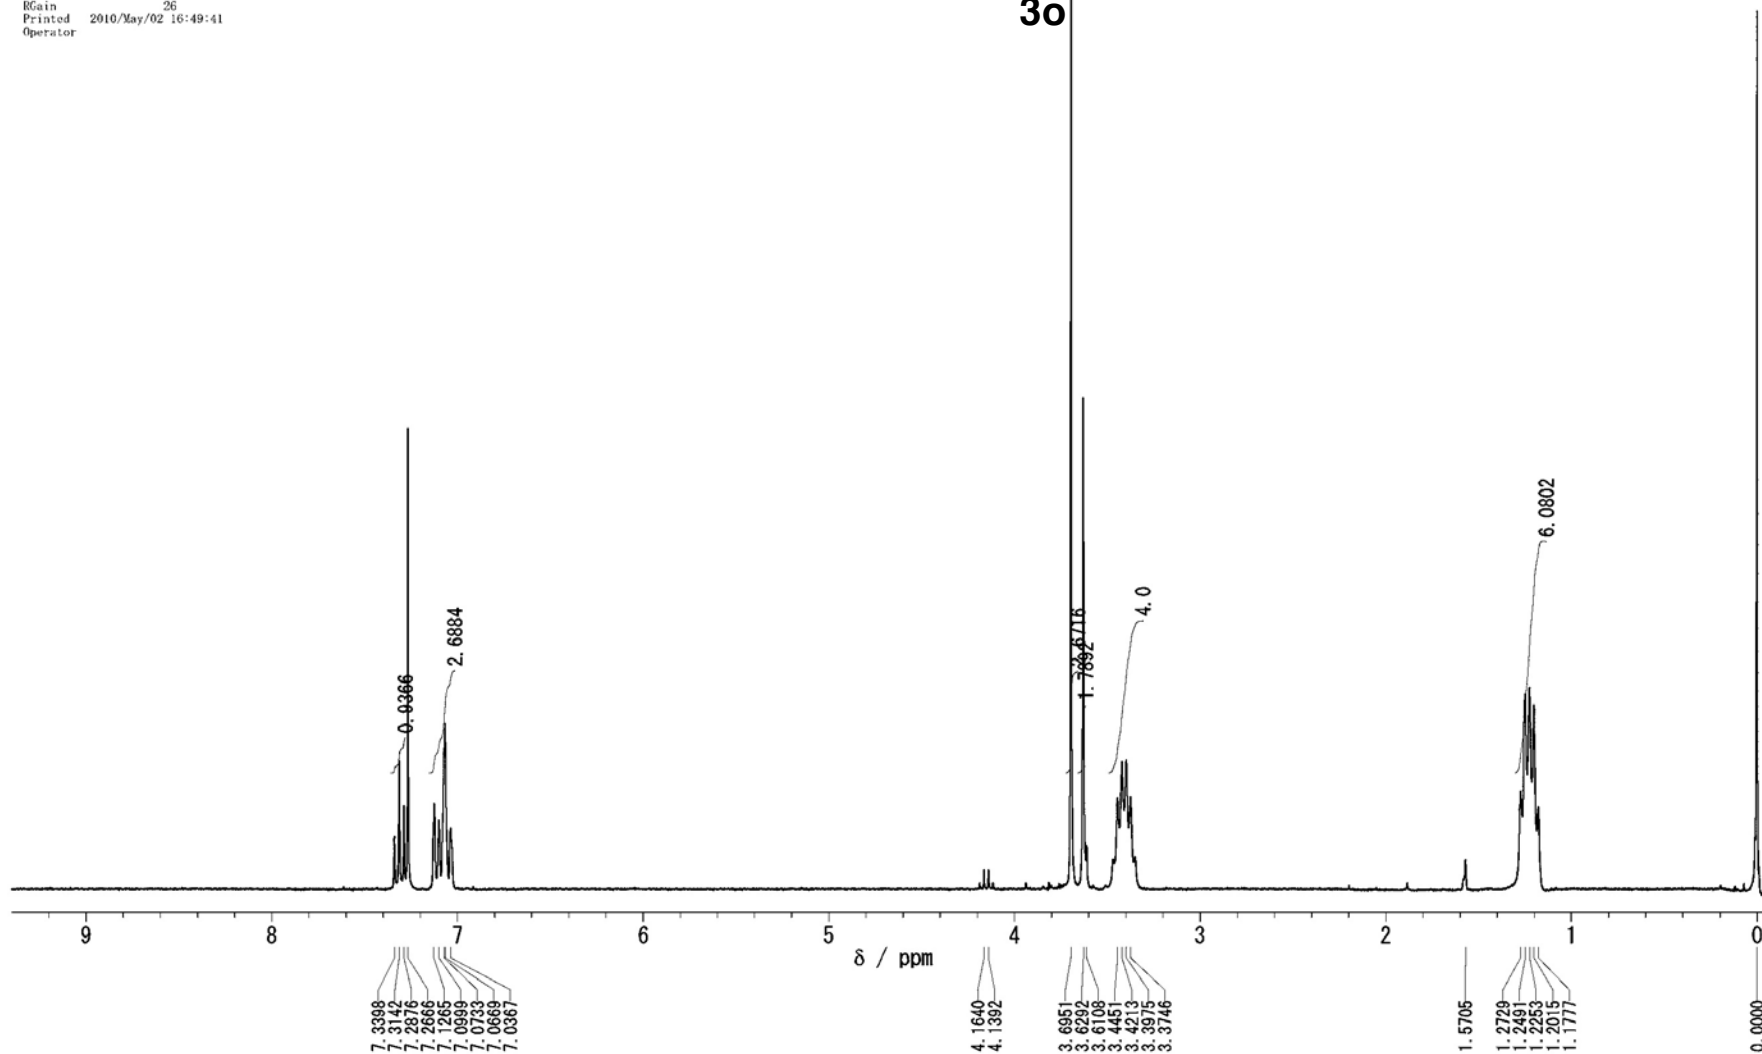

Original File:  
 Date Mar 6 10  
 Comment  
 C13 Standard Observe  
 Stick=none Tune=6.4 Match=0.4

ObsNuc <sup>13</sup>C  
 ExMode NON  
 ObsFreq 75.43 MHz  
 ObsSet -1.0 kHz  
 ObsFino 996.3672 Hz  
 Point 32768  
 Frequency(Span) 18761.73 Hz  
 Scan 128  
 AcqTime 1.4992 s  
 PD 1.501 s  
 Pulsel 6.0  $\mu$ s  
 Temperature 29.0  $^{\circ}$ C  
 Solvent CDCl<sub>3</sub>  
 Reference 77.0 ppm  
 Broad.Factor 0.2863 Hz  
 RGain 30  
 Printed 2010/May/02 16:51:51  
 Operator

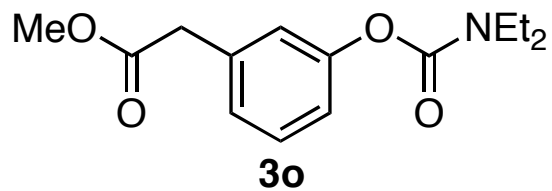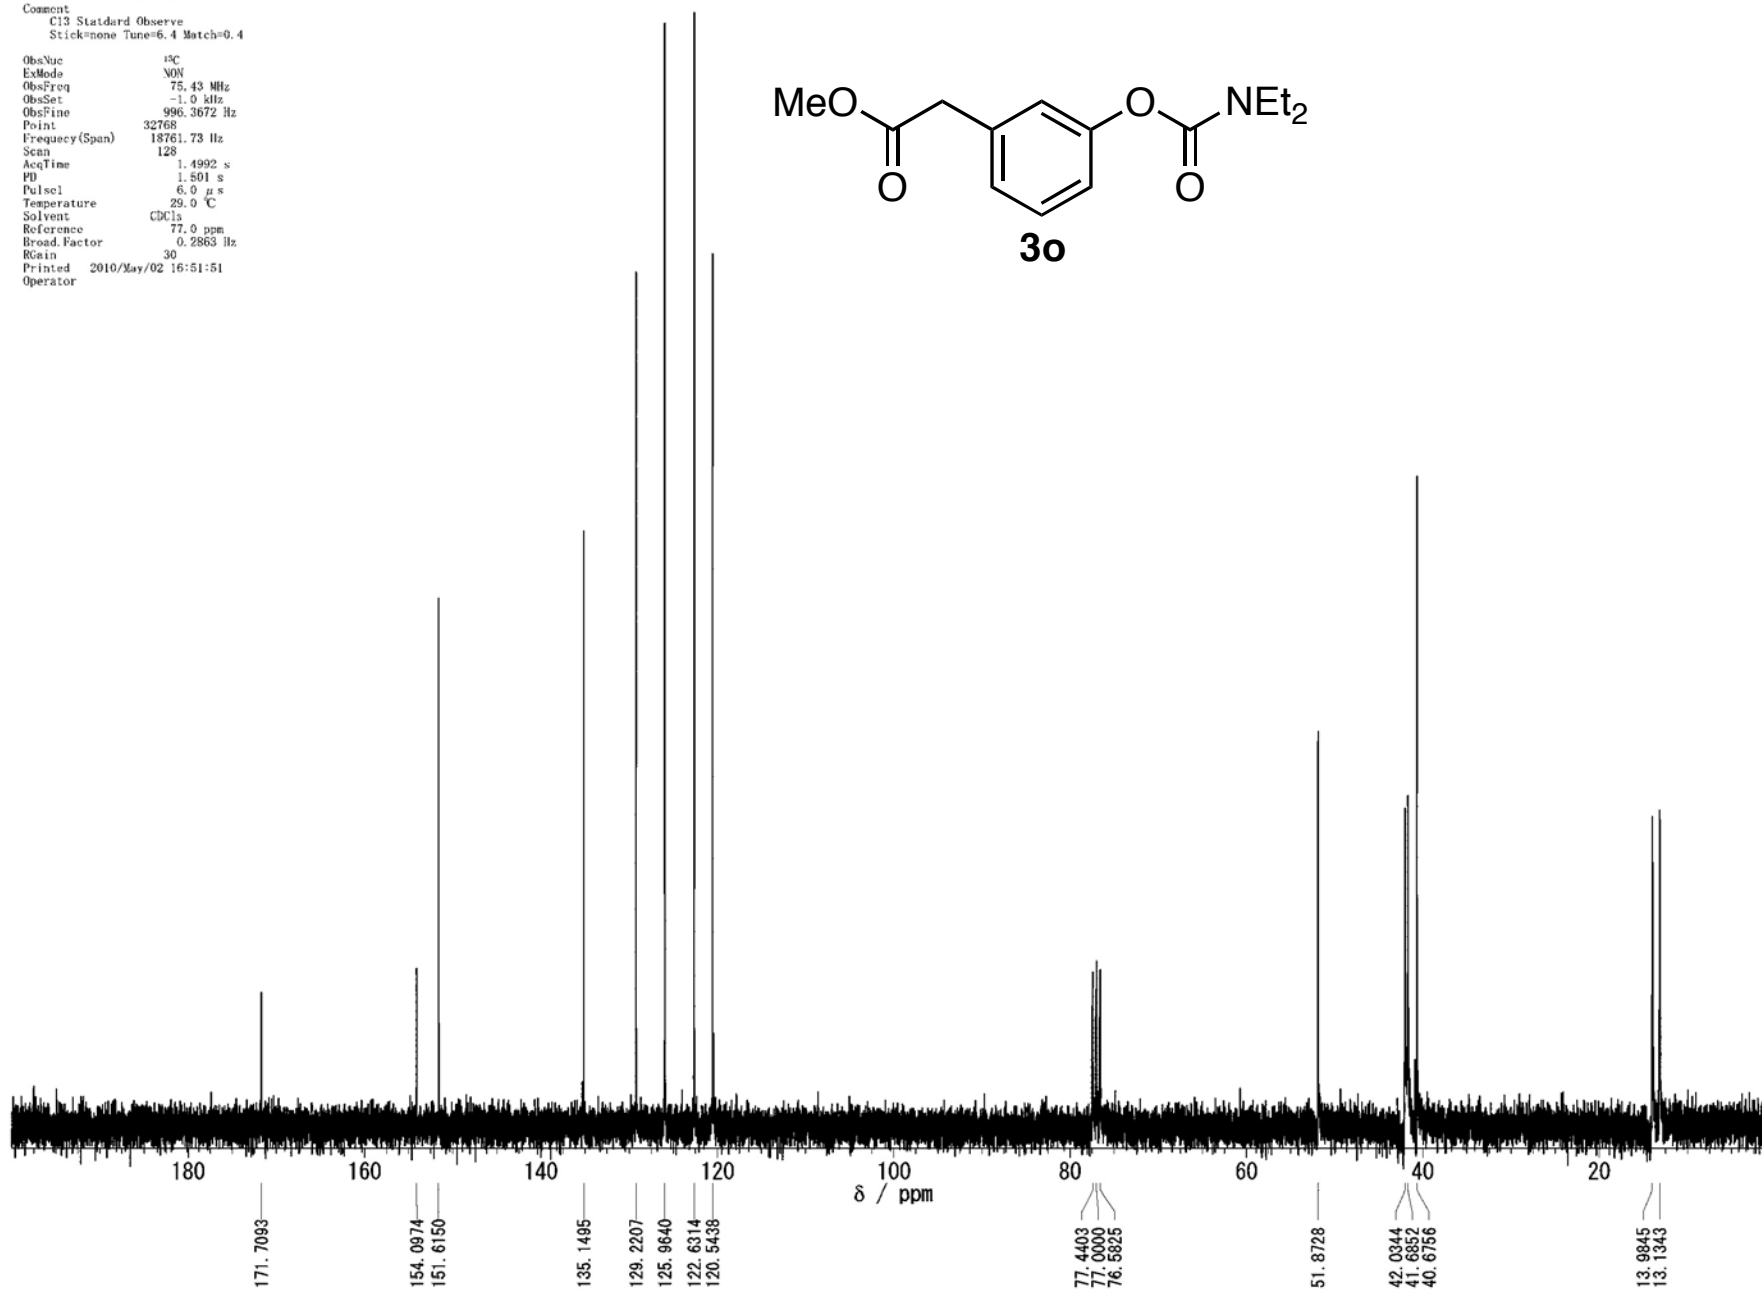

Original File:   
 Date: Dec 10 09   
 Comment: STANDARD 1H OBSERVE   
 ObsNuc:  $^1\text{H}$    
 ExMode: NON   
 ObsFreq: 299.96 MHz   
 ObsSet: 1.0 kHz   
 ObsPine: 995.0047 Hz   
 Point: 16384   
 Frequency (Span): 4500.45 Hz   
 Scan: 16   
 AcqTime: 3.4983 s   
 PD: 1.502 s   
 Pulse1: 6.0  $\mu\text{s}$    
 Temperature: 29.0  $^{\circ}\text{C}$    
 Solvent:  $\text{CDCl}_3$    
 Reference: 0.0 ppm   
 Broad. Factor: 0.1373 Hz   
 RGain: 24   
 Printed: 2010/Jun/24 14:43:30   
 Operator:

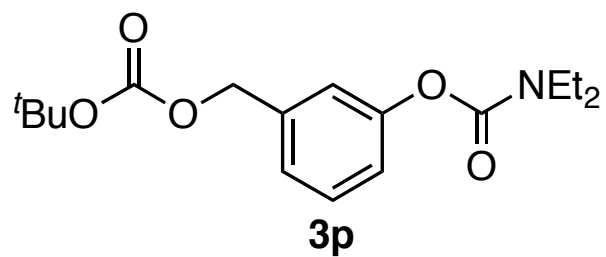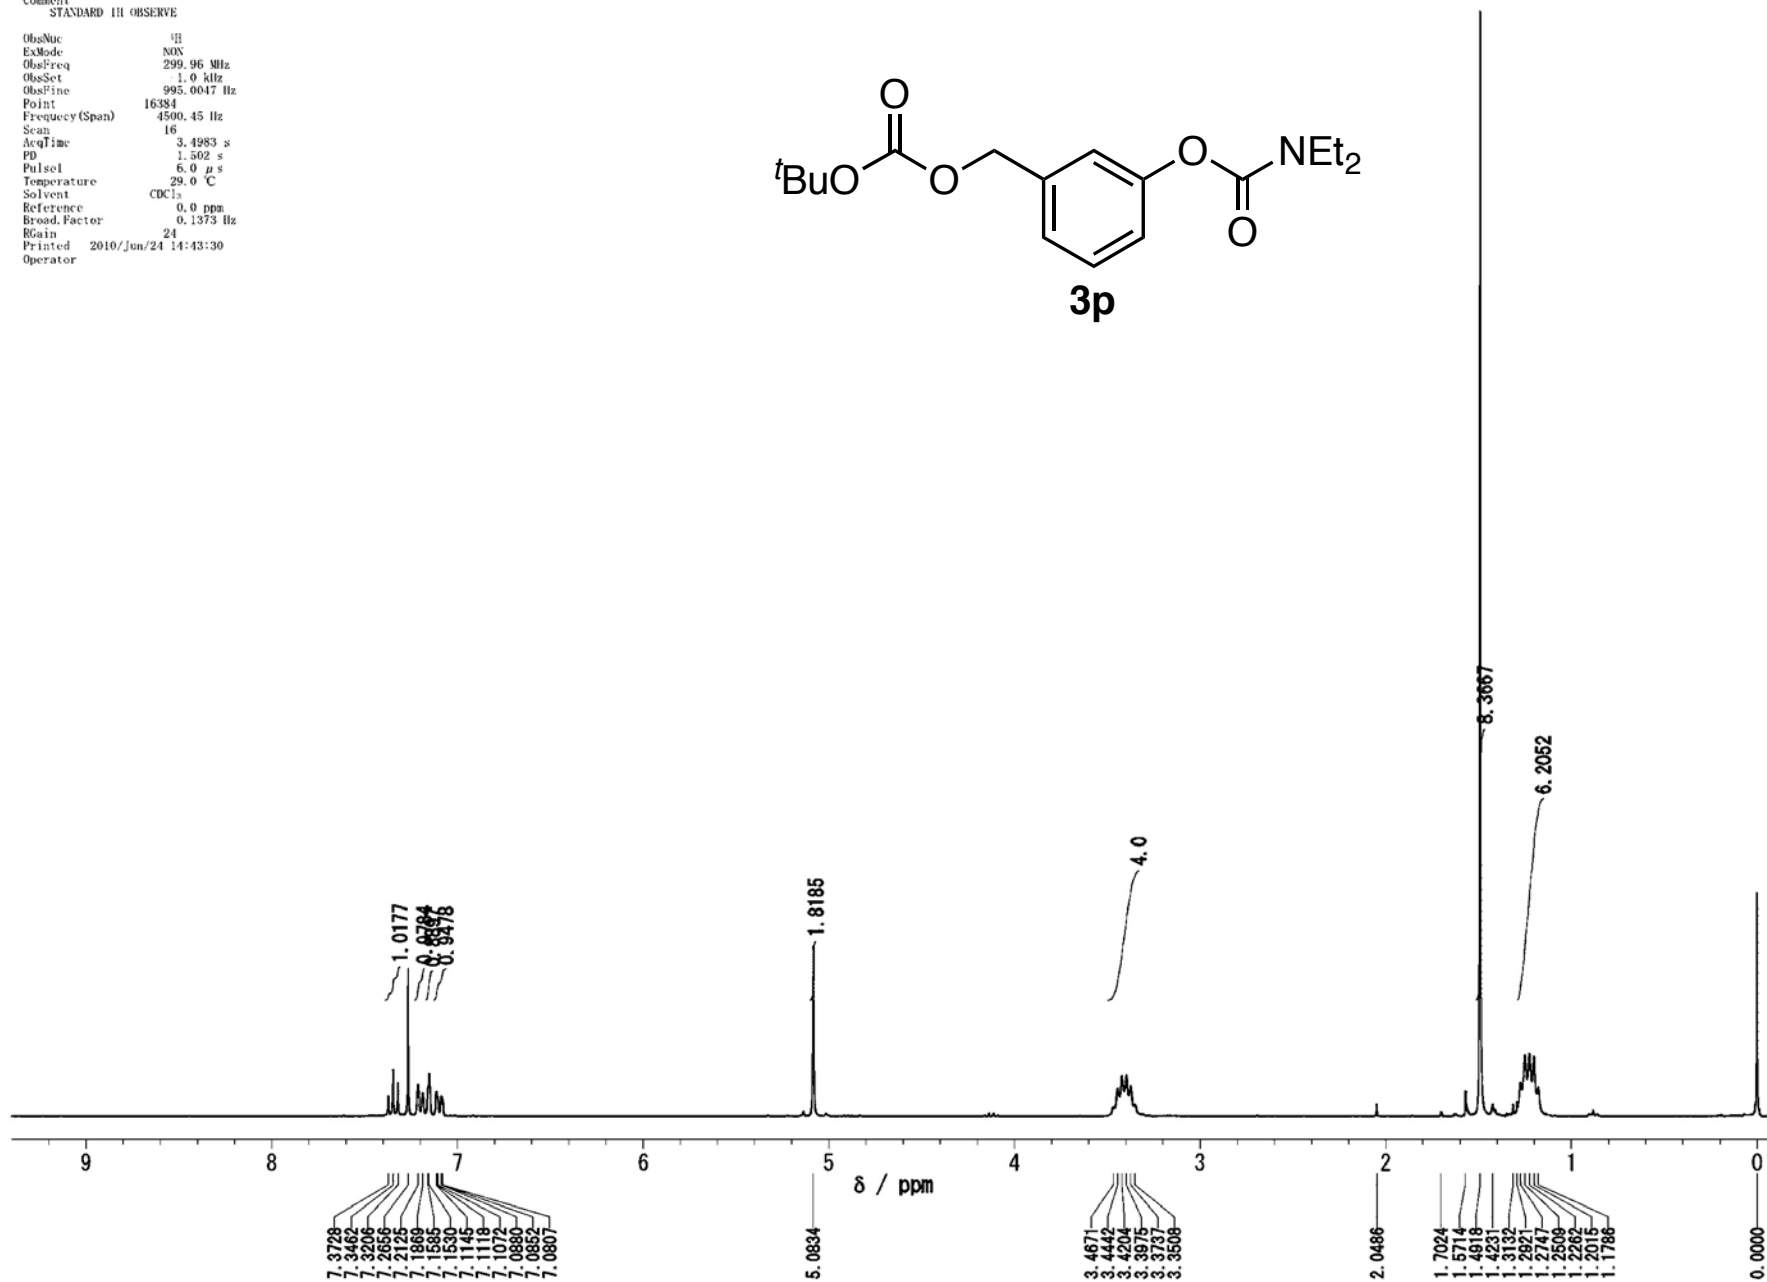



Original File:  
Date Apr 30 10  
Comment  
C13 Standard Observe  
Stick=none Tune=6.4 Match=0.4

ObsNuc  $^{13}\text{C}$   
ExMode NON  
ObsFreq 75.43 MHz  
ObsSet -1.0 kHz  
ObsFino 996.3672 Hz  
Point 32768  
Frequency(Span) 18761.73 Hz  
Scan 128  
AcqTime 1.4992 s  
PD 1.501 s  
Pulse1 6.0  $\mu\text{s}$   
Temperature 29.0  $^{\circ}\text{C}$   
Solvent  $\text{CDCl}_3$   
Reference 77.0 ppm  
Broad.Factor 0.2863 Hz  
RGain 30  
Printed 2010/May/02 16:54:54  
Operator

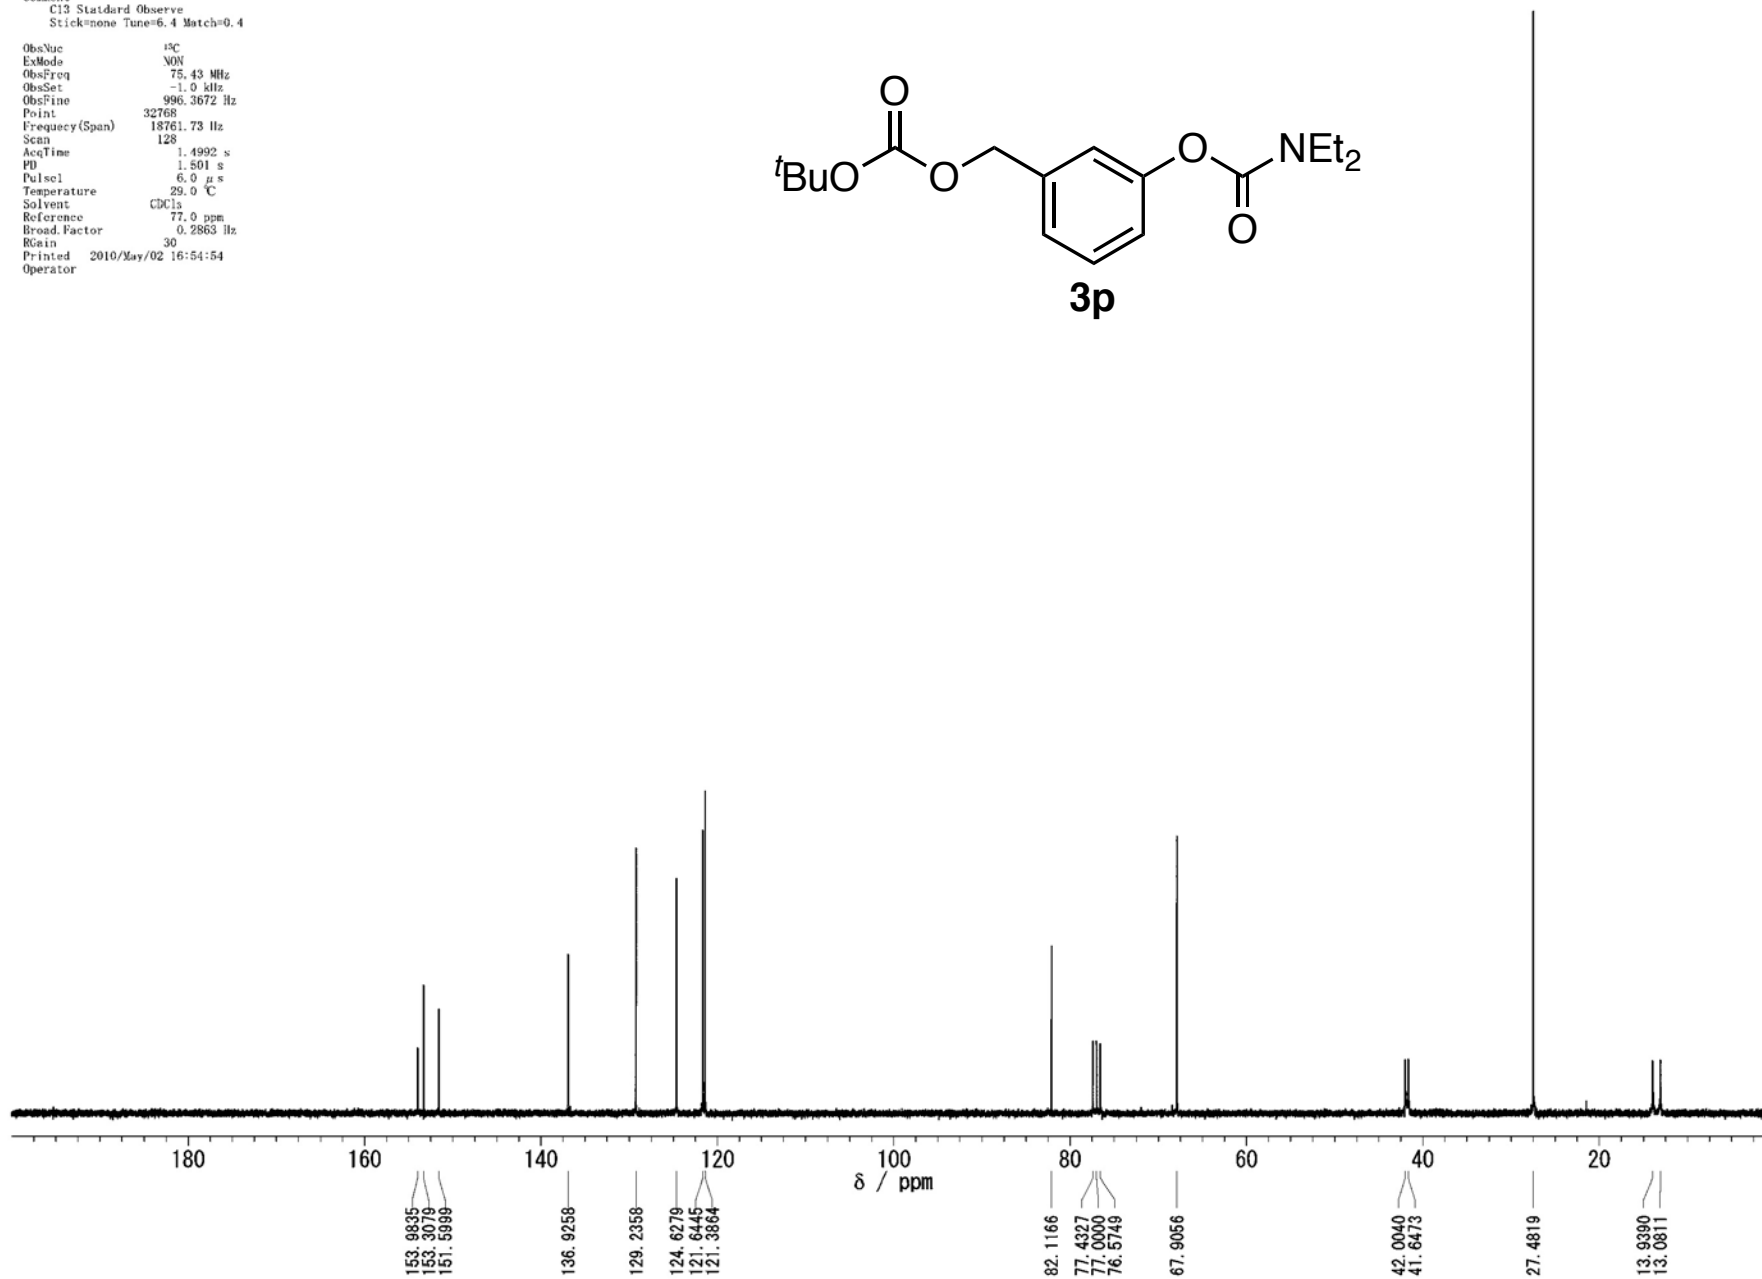

Original File:  
 Date Dec 14 09  
 Comment  
 STANDARD 1H OBSERVE  
 ObsNuc <sup>1</sup>H  
 ExMode NON  
 ObsPraq 299.96 MHz  
 ObsSot -1.0 kHz  
 ObsPine 995.0047 Hz  
 Point 16384  
 Frequency (Span) 4500.45 Hz  
 Scan 16  
 AcqTime 3.4983 s  
 PD 1.502 s  
 Pulsel 6.0  $\mu$ s  
 Temperature 29.0  $^{\circ}$ C  
 Solvent CDCl<sub>3</sub>  
 Reference 0.0 ppm  
 Broad. Factor 0.1373 Hz  
 RGain 26  
 Printed 2010/May/02 16:58:27  
 Operator

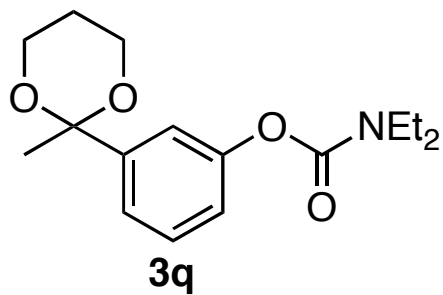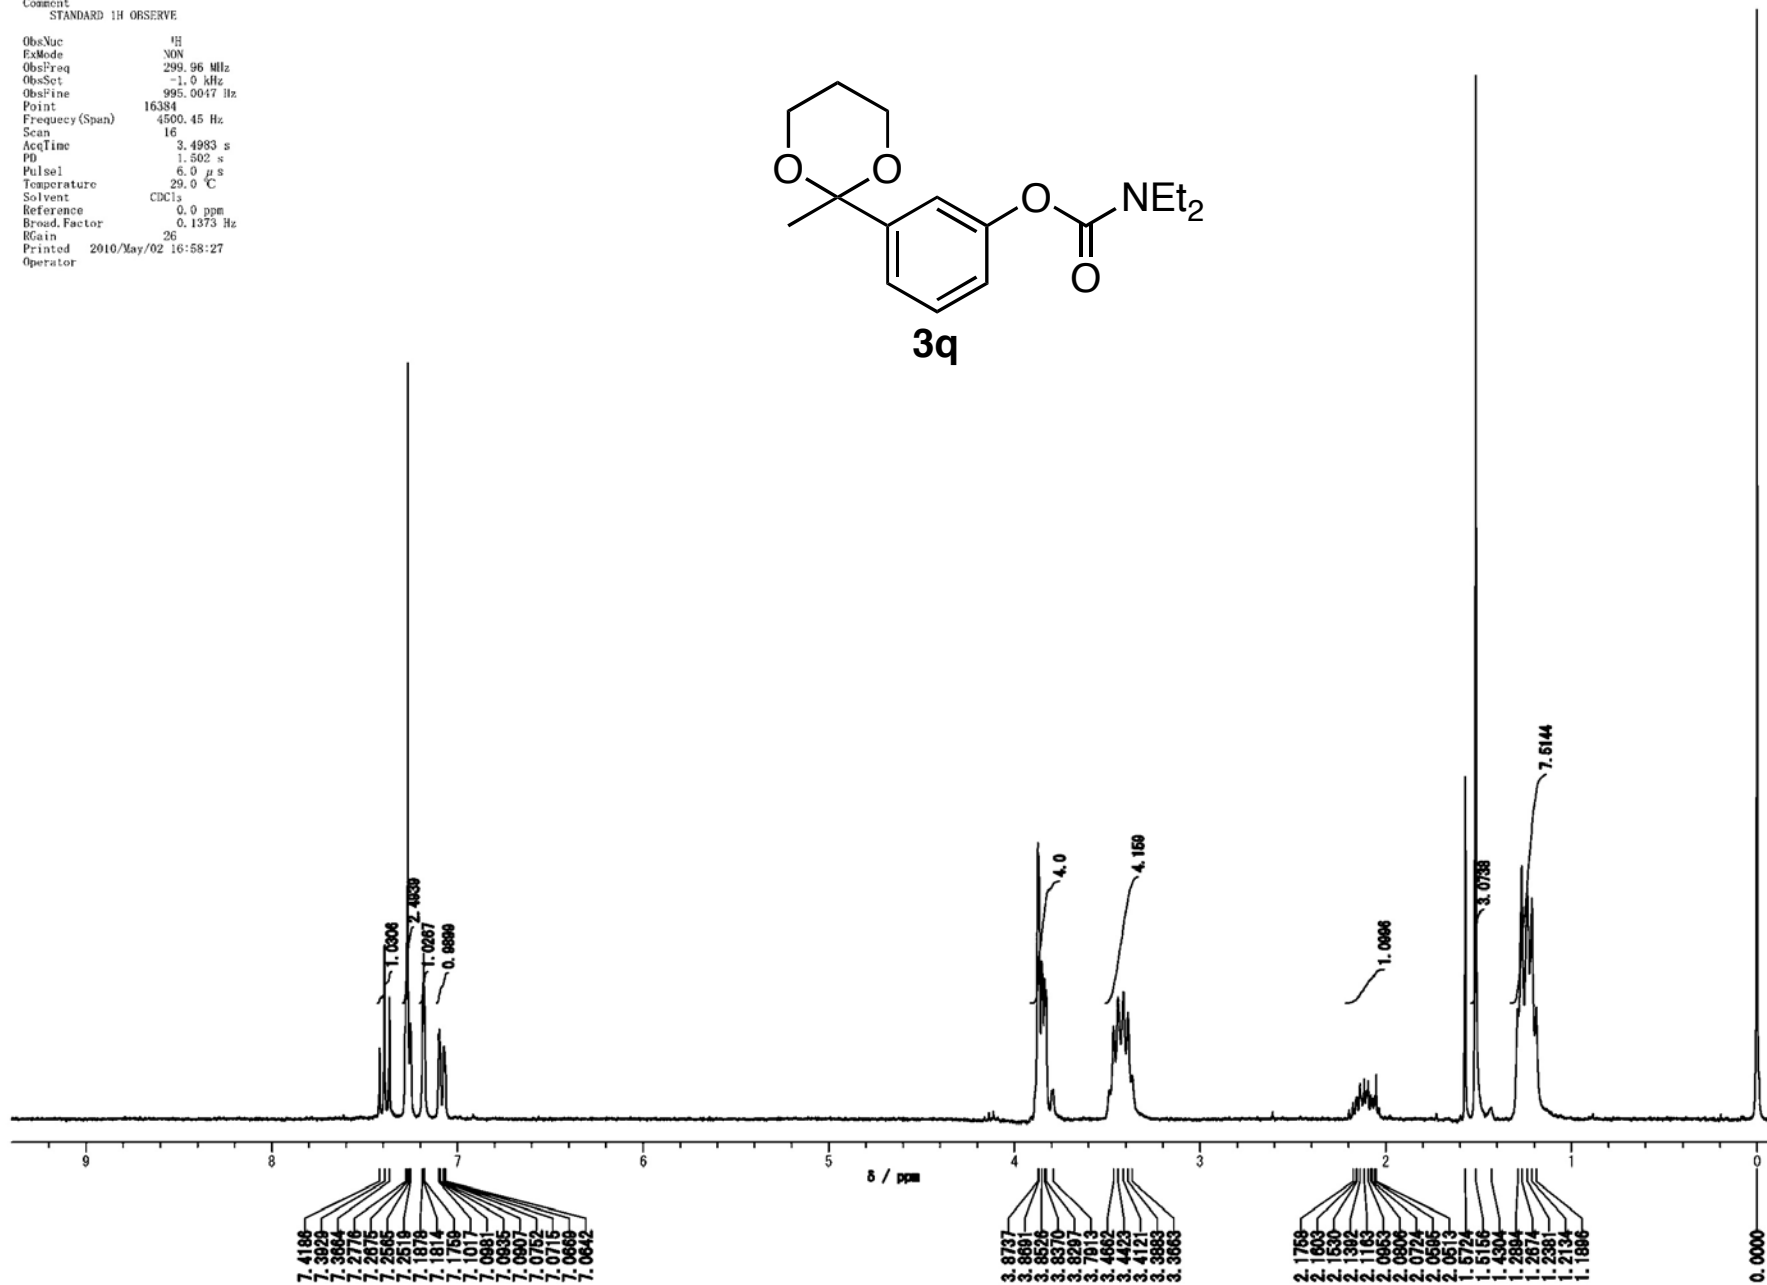

Original File:  
Date Apr 30 10  
Comment  
C13 Standard Observe  
Stick:none Tune=6.4 Match=0.4

ObsNuc  $^{13}\text{C}$   
ExMode NON  
ObsFreq 75.43 MHz  
ObsSet -1.0 kHz  
ObsFino 996.3672 Hz  
Point 32768  
Frequency(Span) 18761.73 Hz  
Scan 256  
AcqTime 1.4992 s  
PD 1.501 s  
Pulse 6.0  $\mu\text{s}$   
Temperature 29.0  $^{\circ}\text{C}$   
Solvent  $\text{CDCl}_3$   
Reference 77.0 ppm  
Broad.Factor 0.2863 Hz  
RGain 30  
Printed 2010/May/02 16:59:30  
Operator

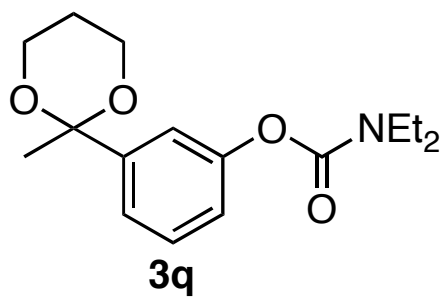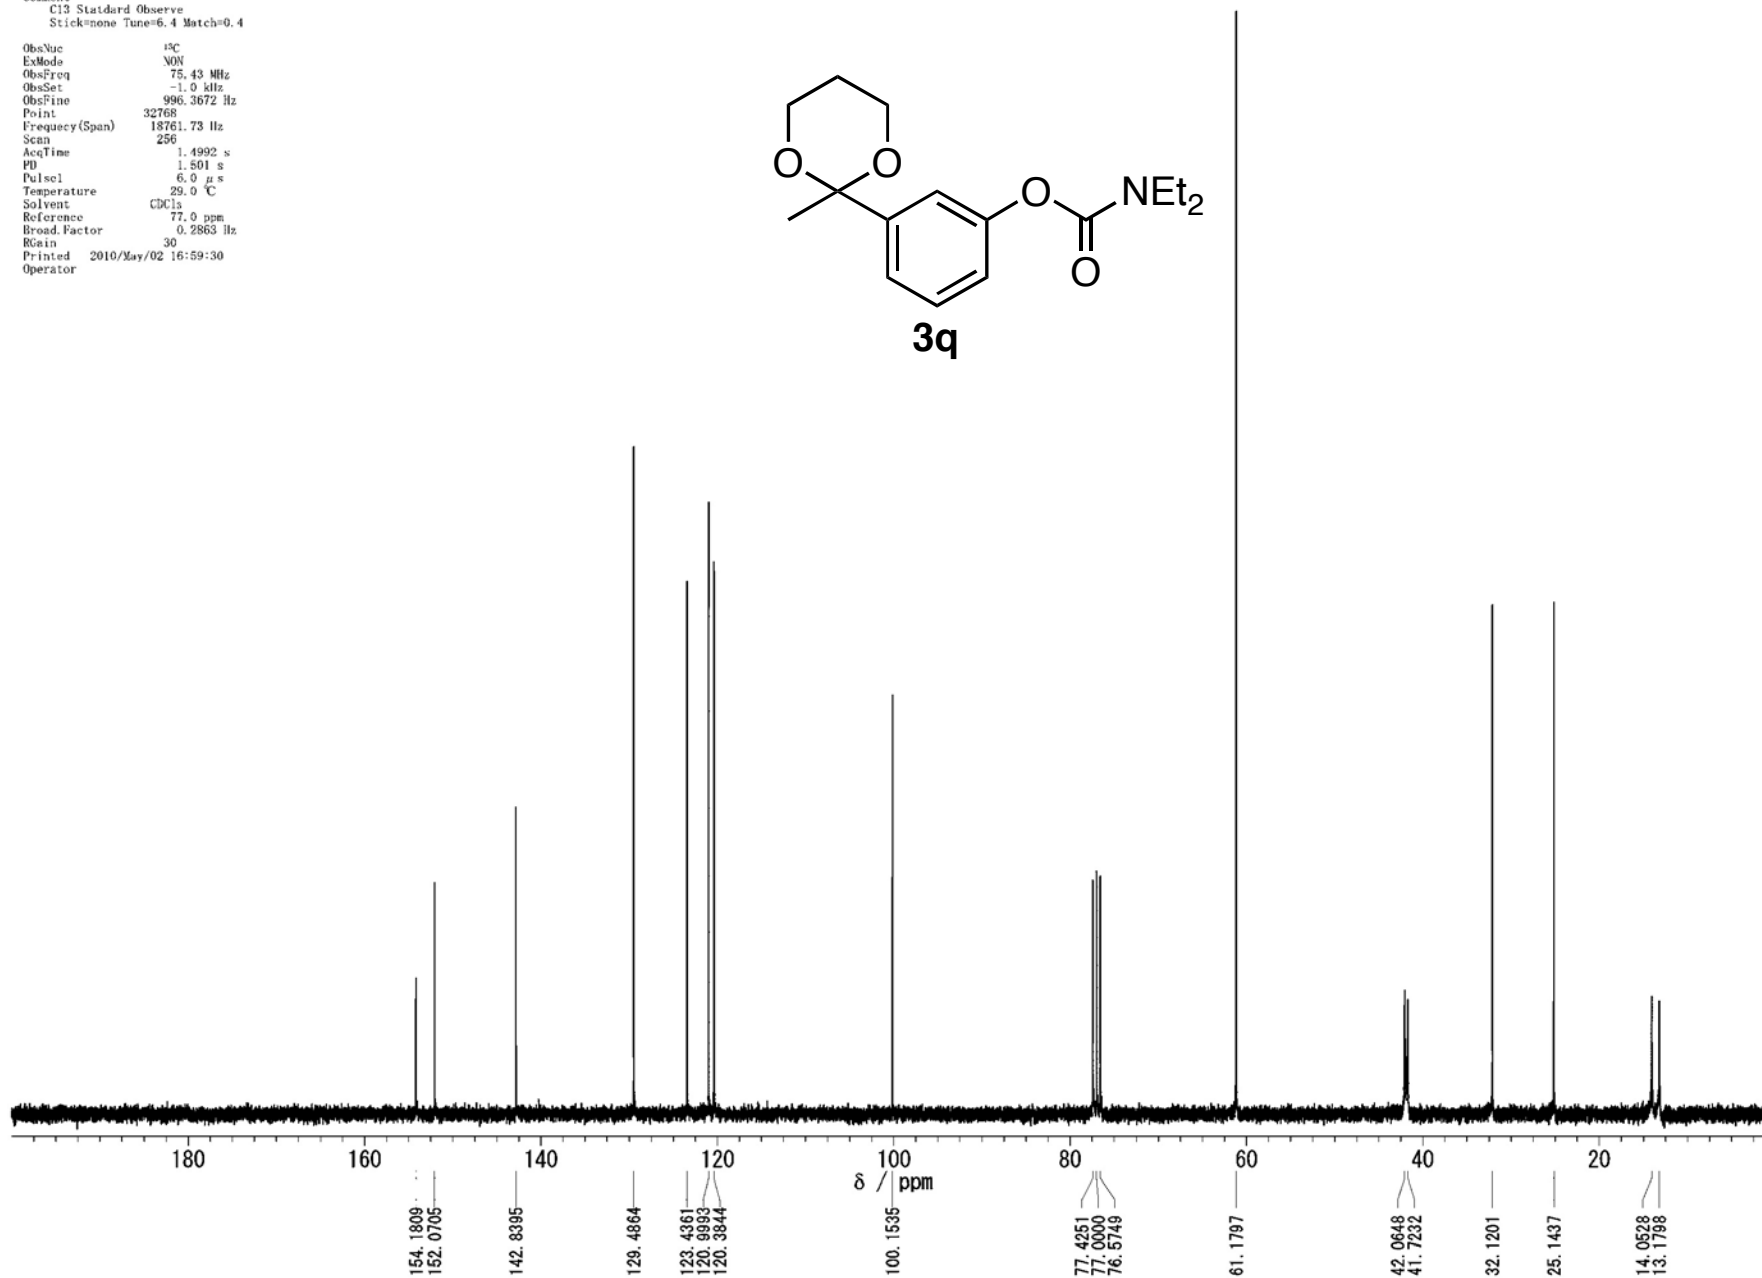

Original File:  
 Date Sep 9 09  
 Comment  
 STANDARD 1H OBSERVE  
 ObsNuc <sup>1</sup>H  
 ExMode NON  
 ObsPraq 299.96 MHz  
 ObsSet -1.0 kHz  
 ObsPine 995.0047 Hz  
 Point 16384  
 Frequency (Span) 4500.45 Hz  
 Scan 16  
 AcqTime 3.4983 s  
 PD 1.502 s  
 Pulse 6.0  $\mu$ s  
 Temperature 29.0  $^{\circ}$ C  
 Solvent CDCl<sub>3</sub>  
 Reference 0.0 ppm  
 Broad Factor 0.1373 Hz  
 RGain 24  
 Printed 2010/May/02 17:02:15  
 Operator

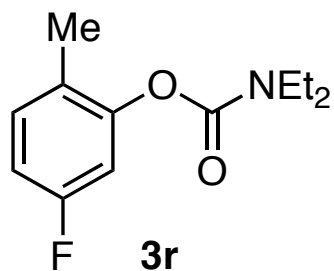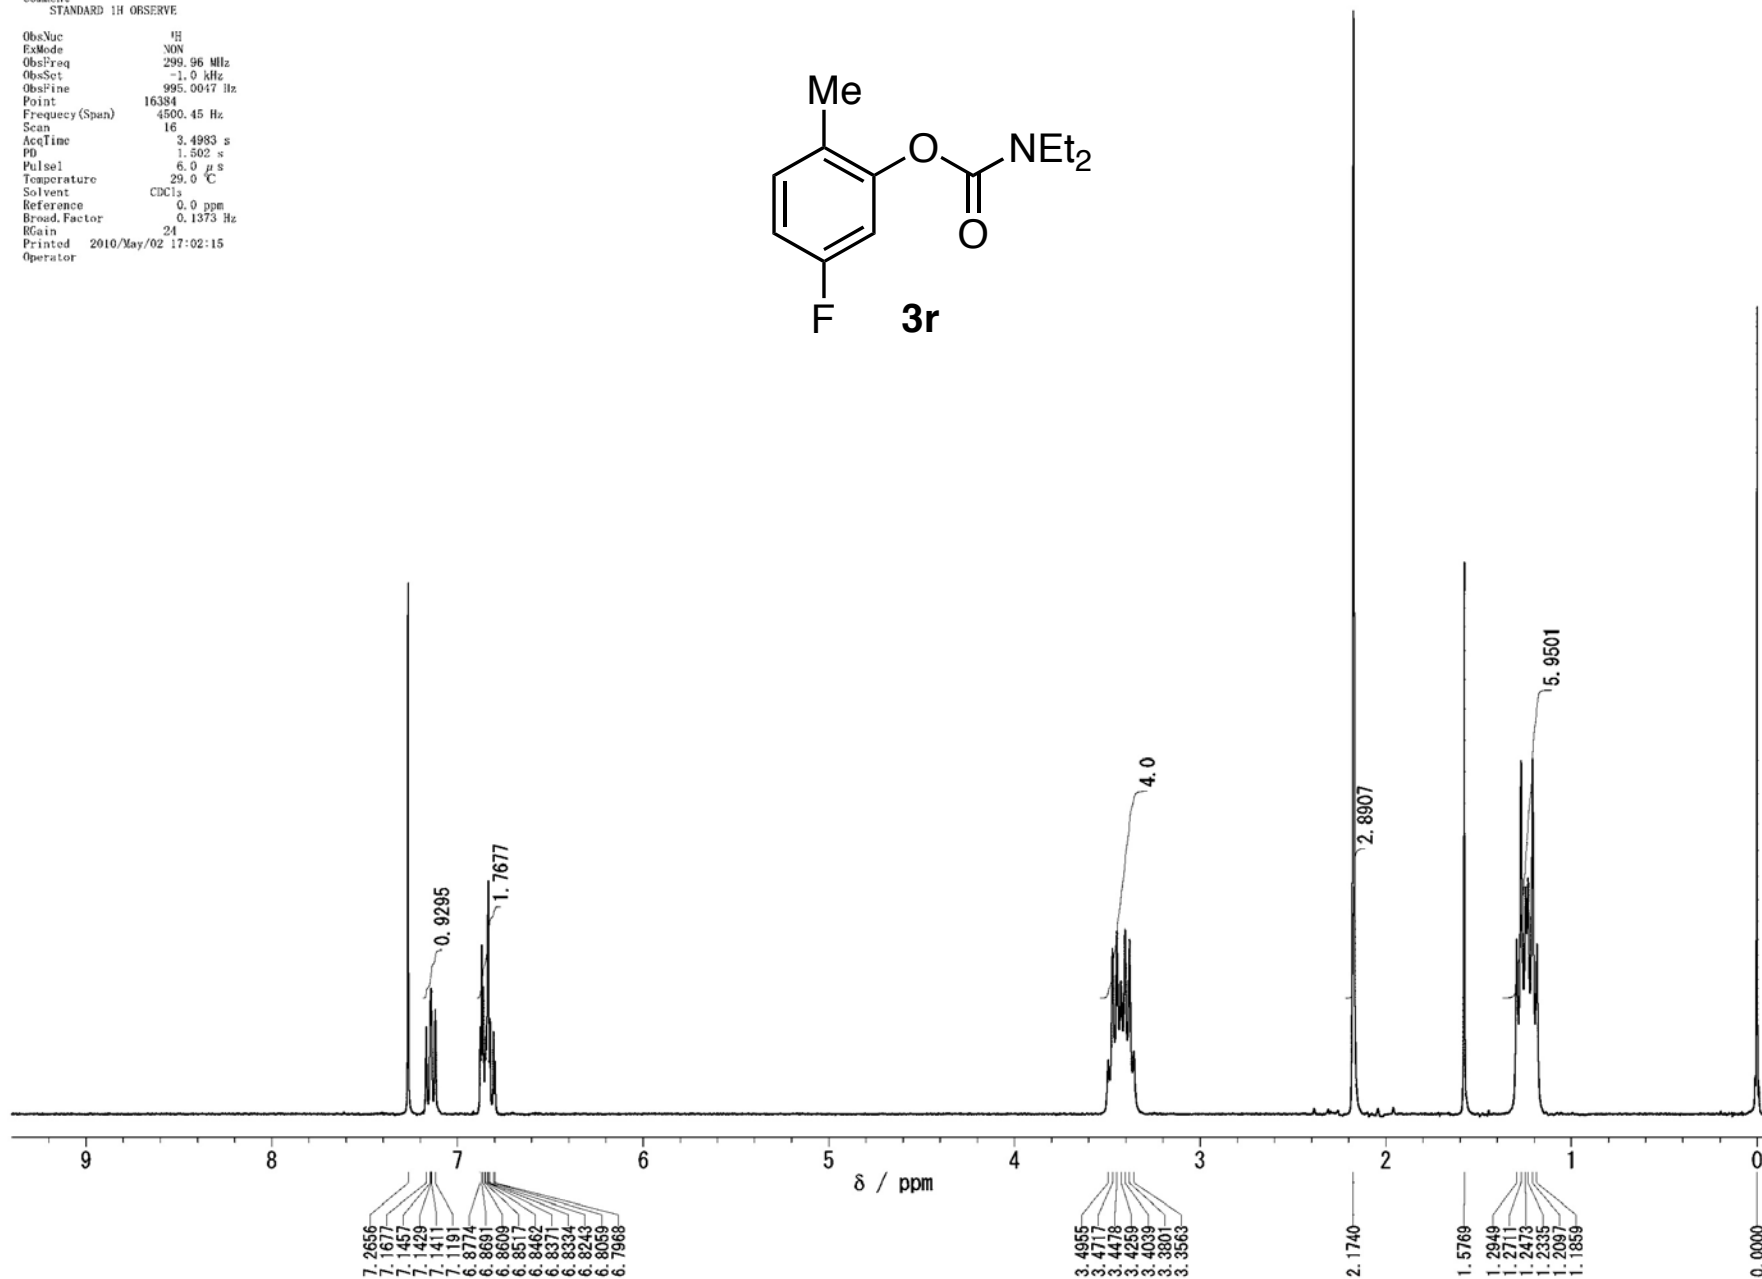

Original File:  
Date Apr 30 10  
Comment  
C13 Standard Observe  
Stick:none Tune=6.4 Match=0.4

ObsNuc <sup>13</sup>C  
ExMode NON  
ObsFreq 75.43 MHz  
ObsSet -1.0 kHz  
ObsFino 996.3672 Hz  
Point 32768  
Frequency(Span) 18761.73 Hz  
Scan 1024  
AcqTime 1.4992 s  
PD 1.501 s  
Pulse1 6.0  $\mu$ s  
Temperature 29.0  $^{\circ}$ C  
Solvent CDCl<sub>3</sub>  
Reference 77.0 ppm  
Broad.Factor 0.2863 Hz  
RGain 30  
Printed 2010/May/02 17:03:18  
Operator

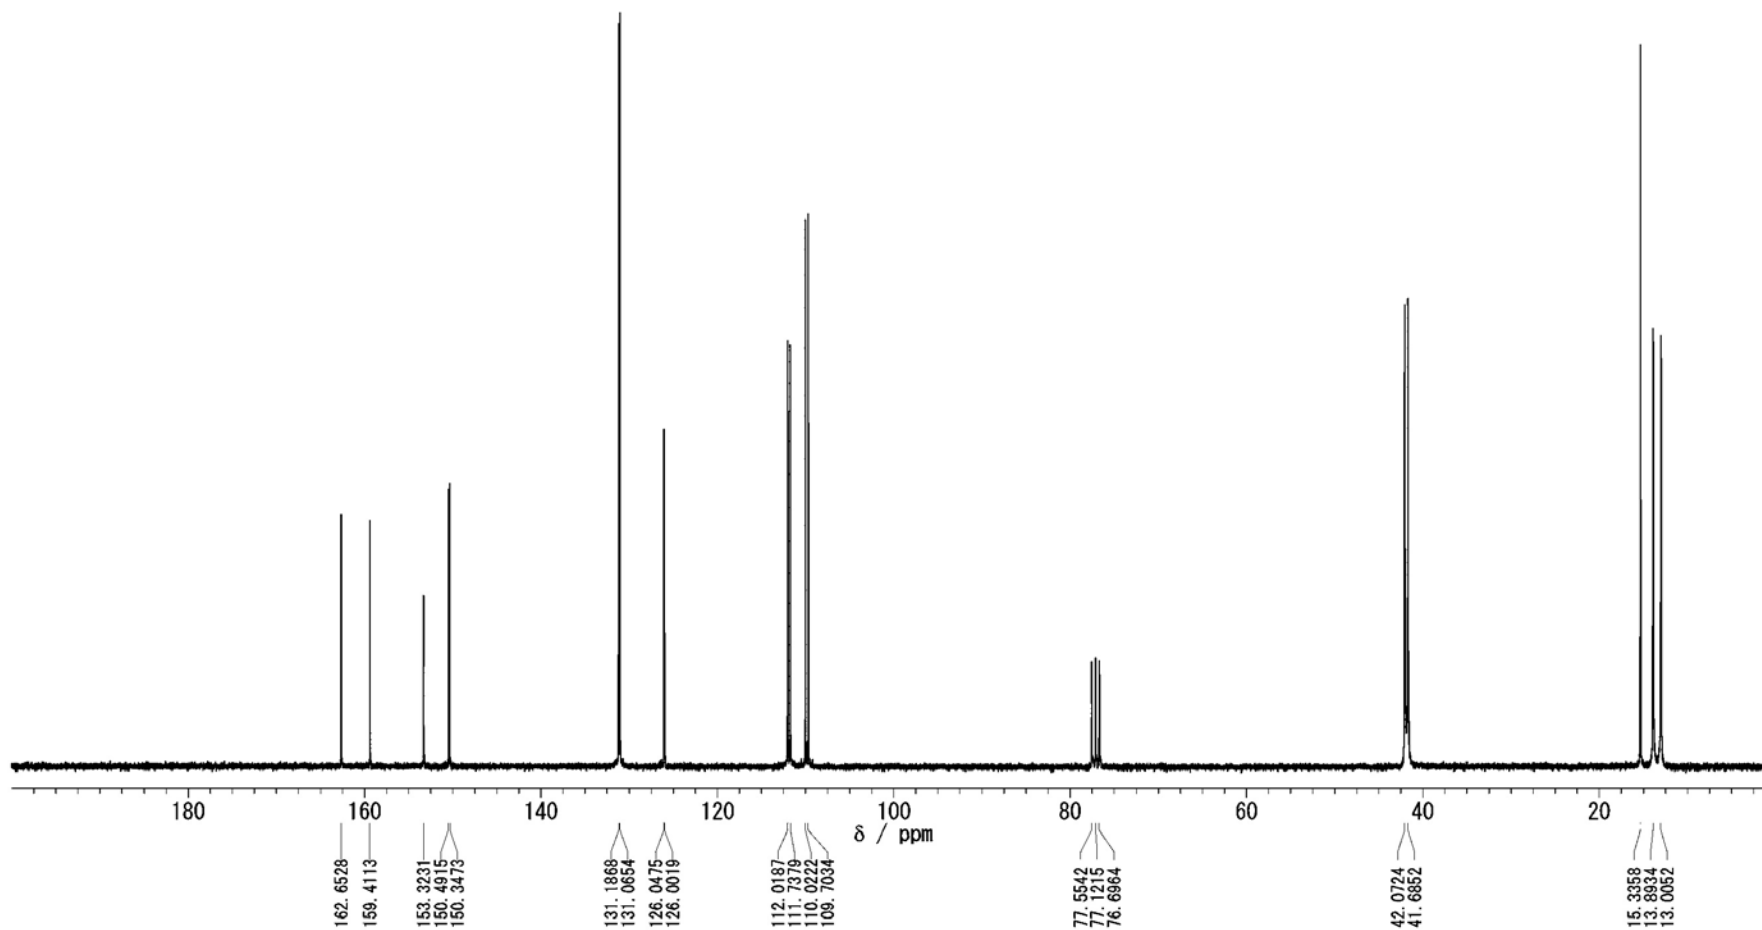

Original File:  
 Date May 29 09  
 Comment STANDARD 1H OBSERVE  
 ObsNuc <sup>1</sup>H  
 ExMode NON  
 ObsPraq 299.96 MHz  
 ObsSet -1.0 kHz  
 ObsPine 995.0017 Hz  
 Point 16384  
 Frequency (Span) 4500.45 Hz  
 Scan 16  
 AcqTime 3.4983 s  
 PD 1.502 s  
 Pulse 6.0  $\mu$ s  
 Temperature 29.0  $^{\circ}$ C  
 Solvent CDCl<sub>3</sub>  
 Reference 0.0 ppm  
 Broad Factor 0.1373 Hz  
 RGain 20  
 Printed 2010/May/02 17:05:34  
 Operator

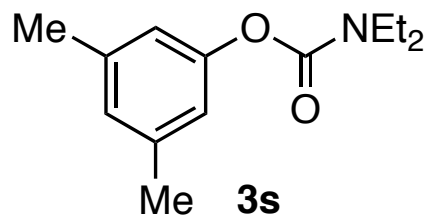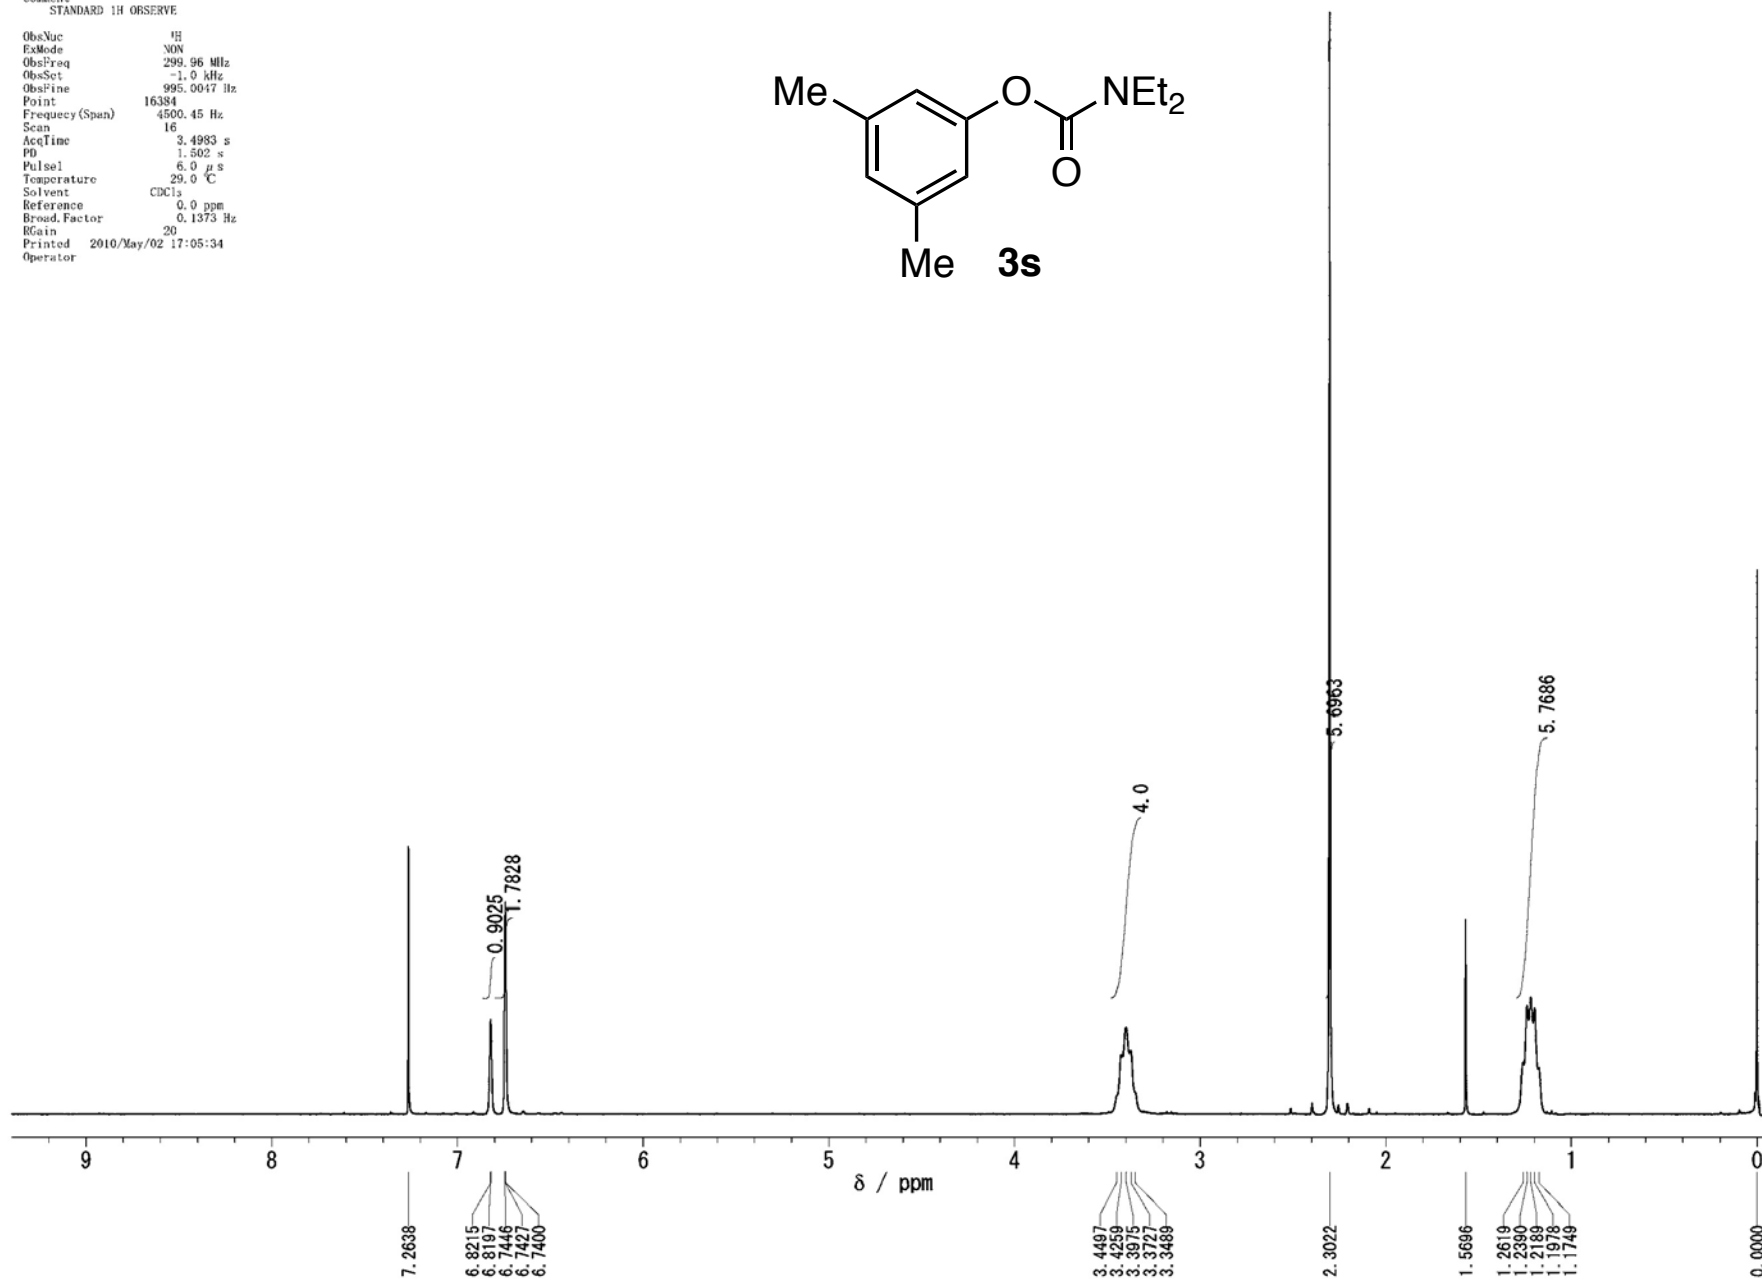

Original File:  
 Date Apr 30 10  
 Comment  
 C13 Standard Observe  
 Stick=none Tune=6.4 Match=0.4

ObsNuc  $^{13}\text{C}$   
 ExMode NON  
 ObsFreq 75.43 MHz  
 ObsSet -1.0 kHz  
 ObsFino 996.3672 Hz  
 Point 32768  
 Frequency(Span) 18761.73 Hz  
 Scan 128  
 AcqTime 1.4992 s  
 PD 1.501 s  
 Pulsel 6.0  $\mu\text{s}$   
 Temperature 29.0  $^{\circ}\text{C}$   
 Solvent  $\text{CDCl}_3$   
 Reference 77.0 ppm  
 Broad.Factor 0.2863 Hz  
 RGain 30  
 Printed 2010/May/02 17:06:52  
 Operator

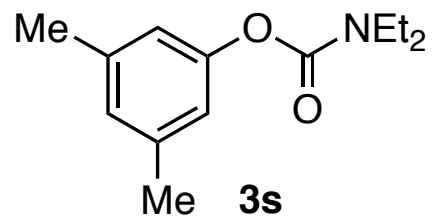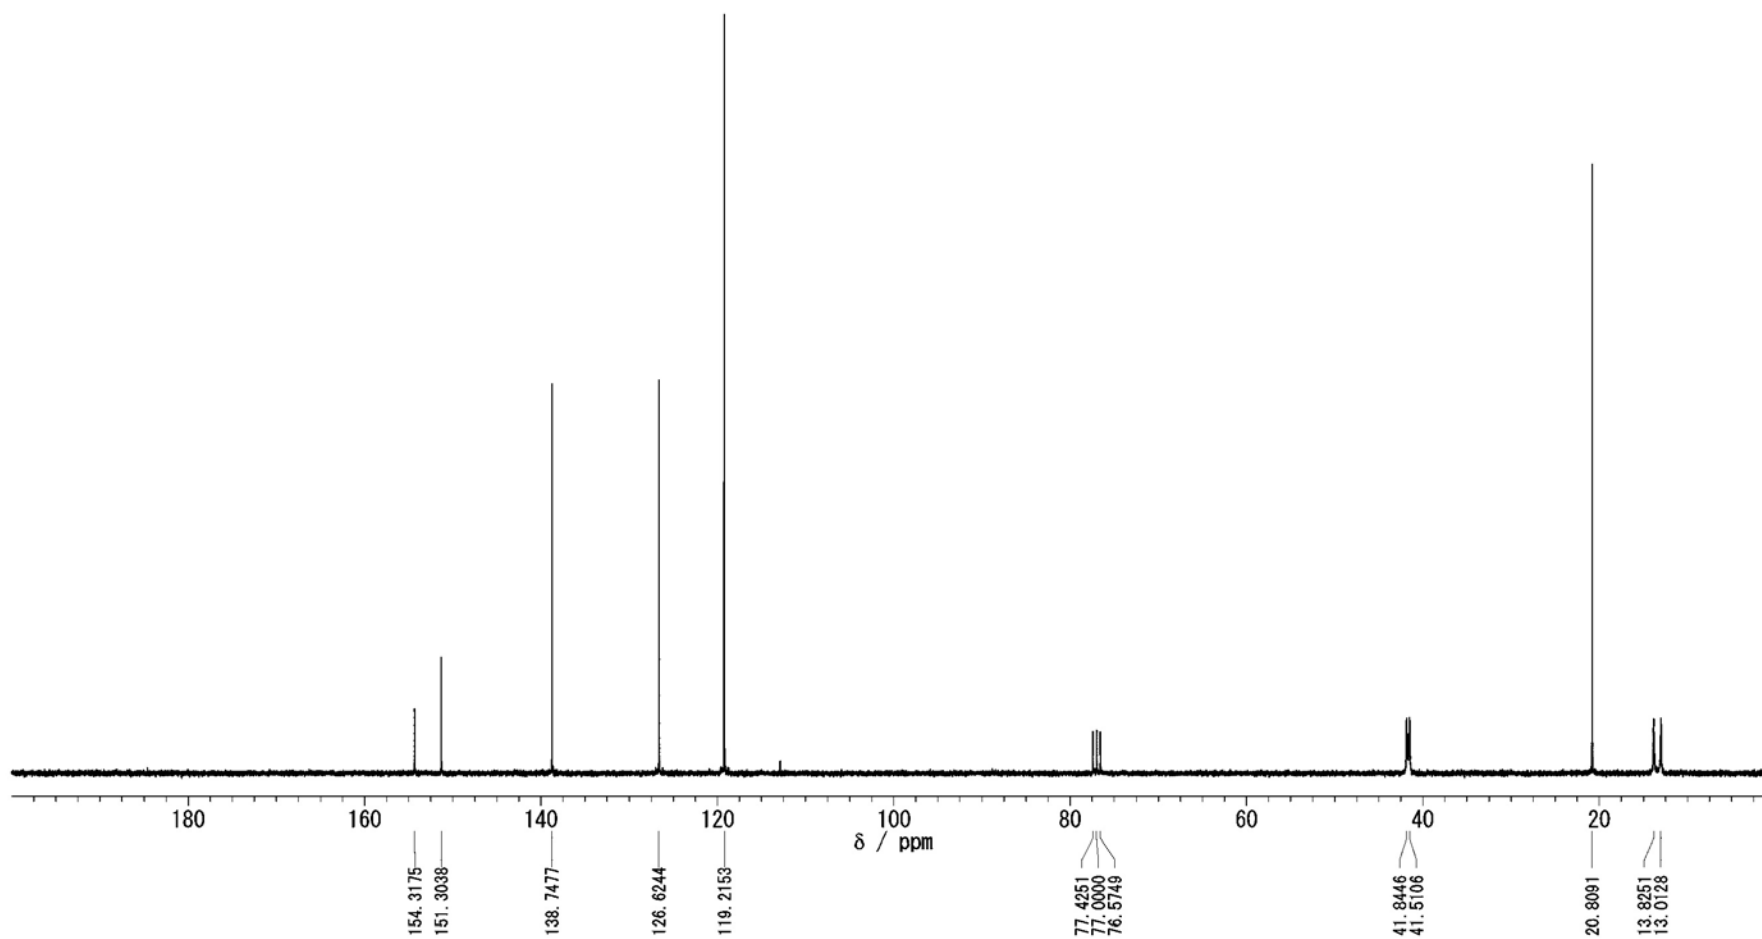

Original File: Jan 14 10  
 Date: Jan 14 10  
 Comment: STANDARD 1H OBSERVE  
 ObsNuc:  $^1\text{H}$   
 ExMode: NON  
 ObsFreq: 299.96 MHz  
 ObsSet: 1.0 kHz  
 ObsPine: 995.0047 Hz  
 Point: 16384  
 Frequency (Span): 4500.45 Hz  
 Scan: 16  
 AcqTime: 3.4983 s  
 PD: 1.502 s  
 Pulse: 6.0  $\mu$ s  
 Temperature: 29.0  $^{\circ}\text{C}$   
 Solvent:  $\text{CDCl}_3$   
 Reference: 0.0 ppm  
 Broad. Factor: 0.1373 Hz  
 RGain: 30  
 Printed: 2010/May/17 14:30:39  
 Operator:

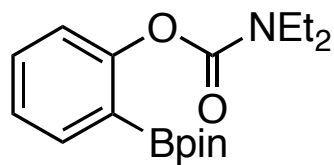

4aa

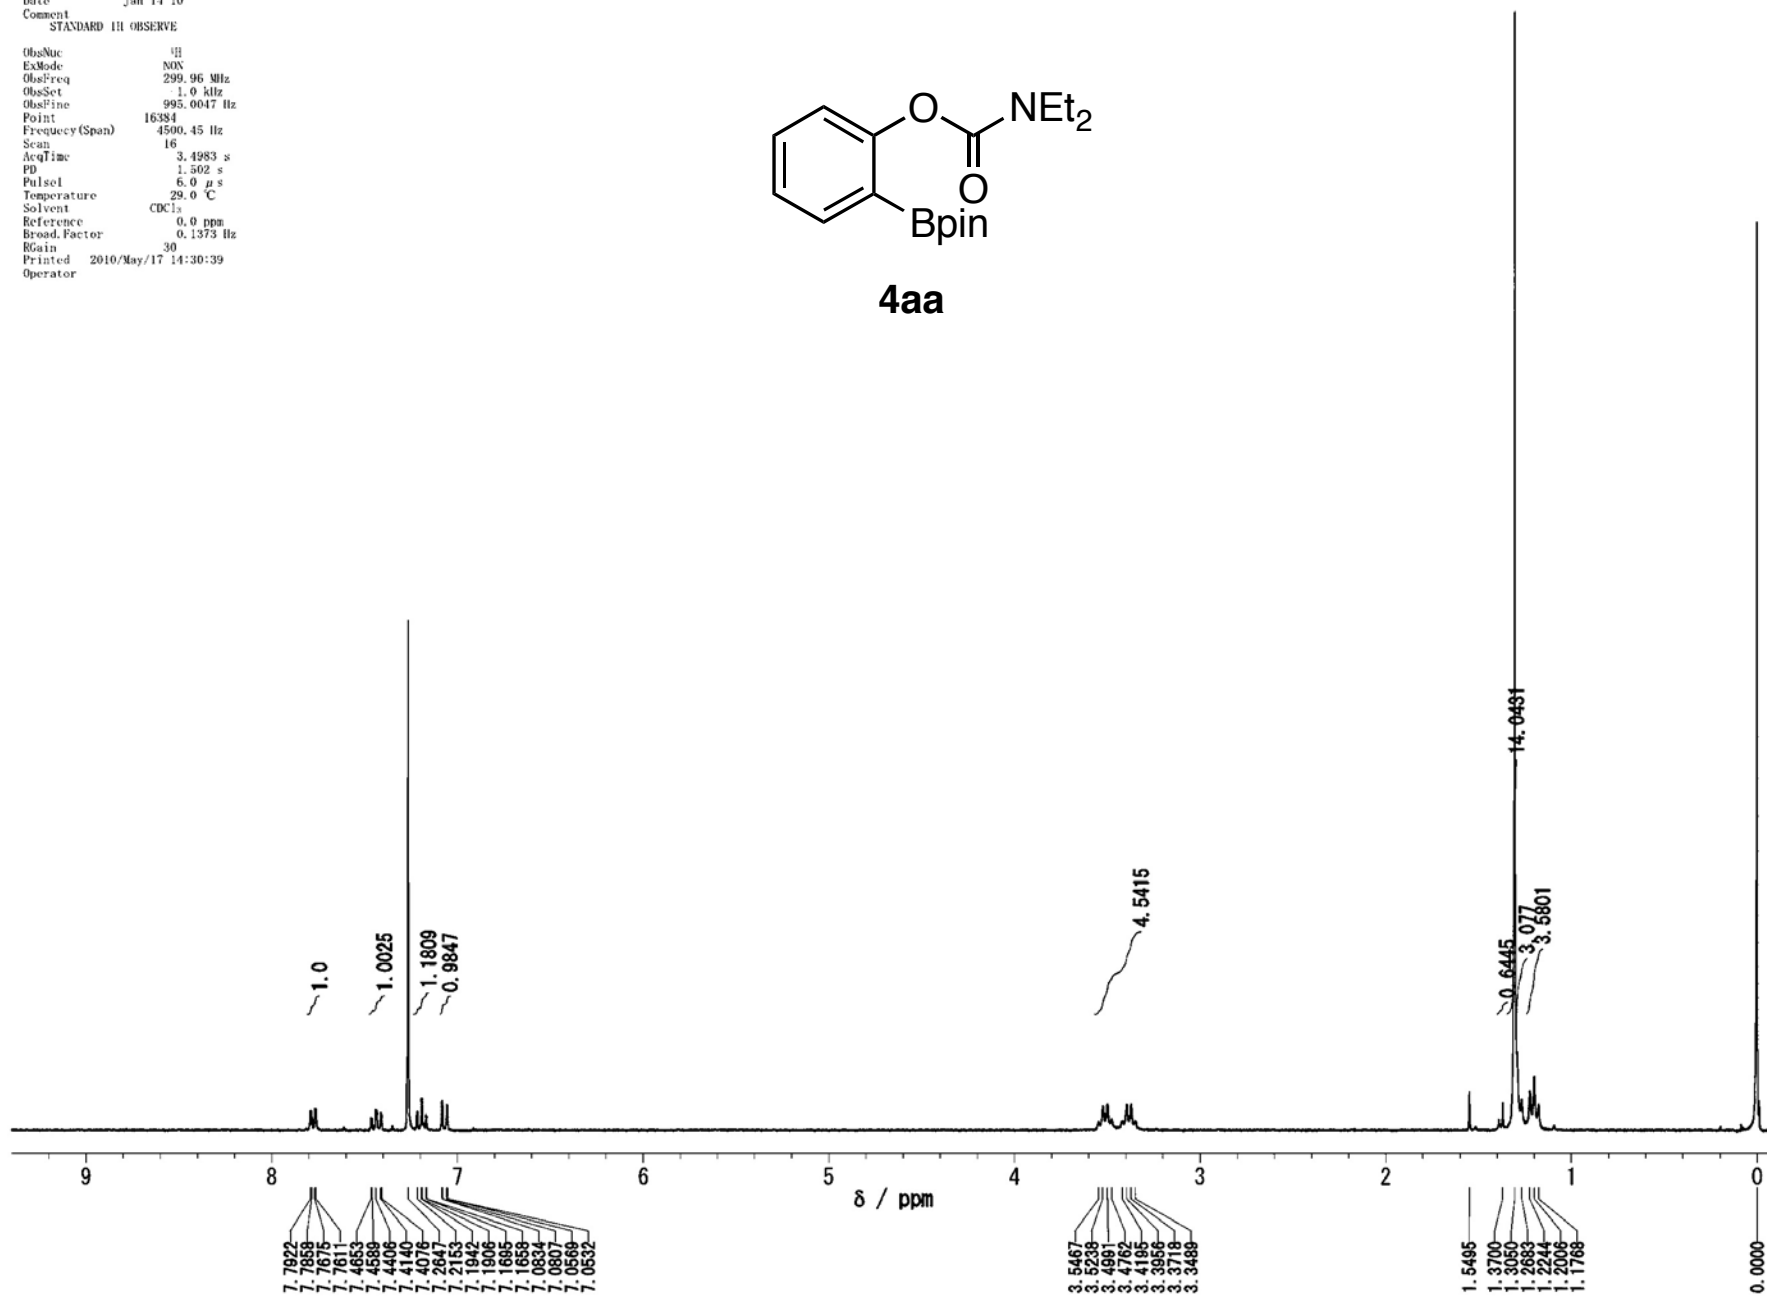



R. A  
d

Comment  
C13 Standard Observe  
Stick:none Tune=6.4 Match=0.4

ObsSoc 1PC  
ExMode NOX  
ObsFreq 75.43 MHz  
ObsSet -1.0 kHz  
ObsFine 996.3672 Hz  
Point 32768  
Frequency (Span) 18761.73 Hz  
Scan 128  
AcqTime 1.4992 s  
PD 1.501 s  
Pulse1 6.0  $\mu$ s  
Temperature 29.0  $^{\circ}$ C  
Solvent CDCl<sub>3</sub>  
Reference 77.0 ppm  
Broad.Factor 0.25 Hz  
RGain 30  
Printed 2010/May/17 14:43:13  
Operator

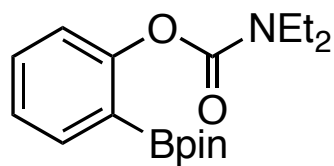

**4aa**

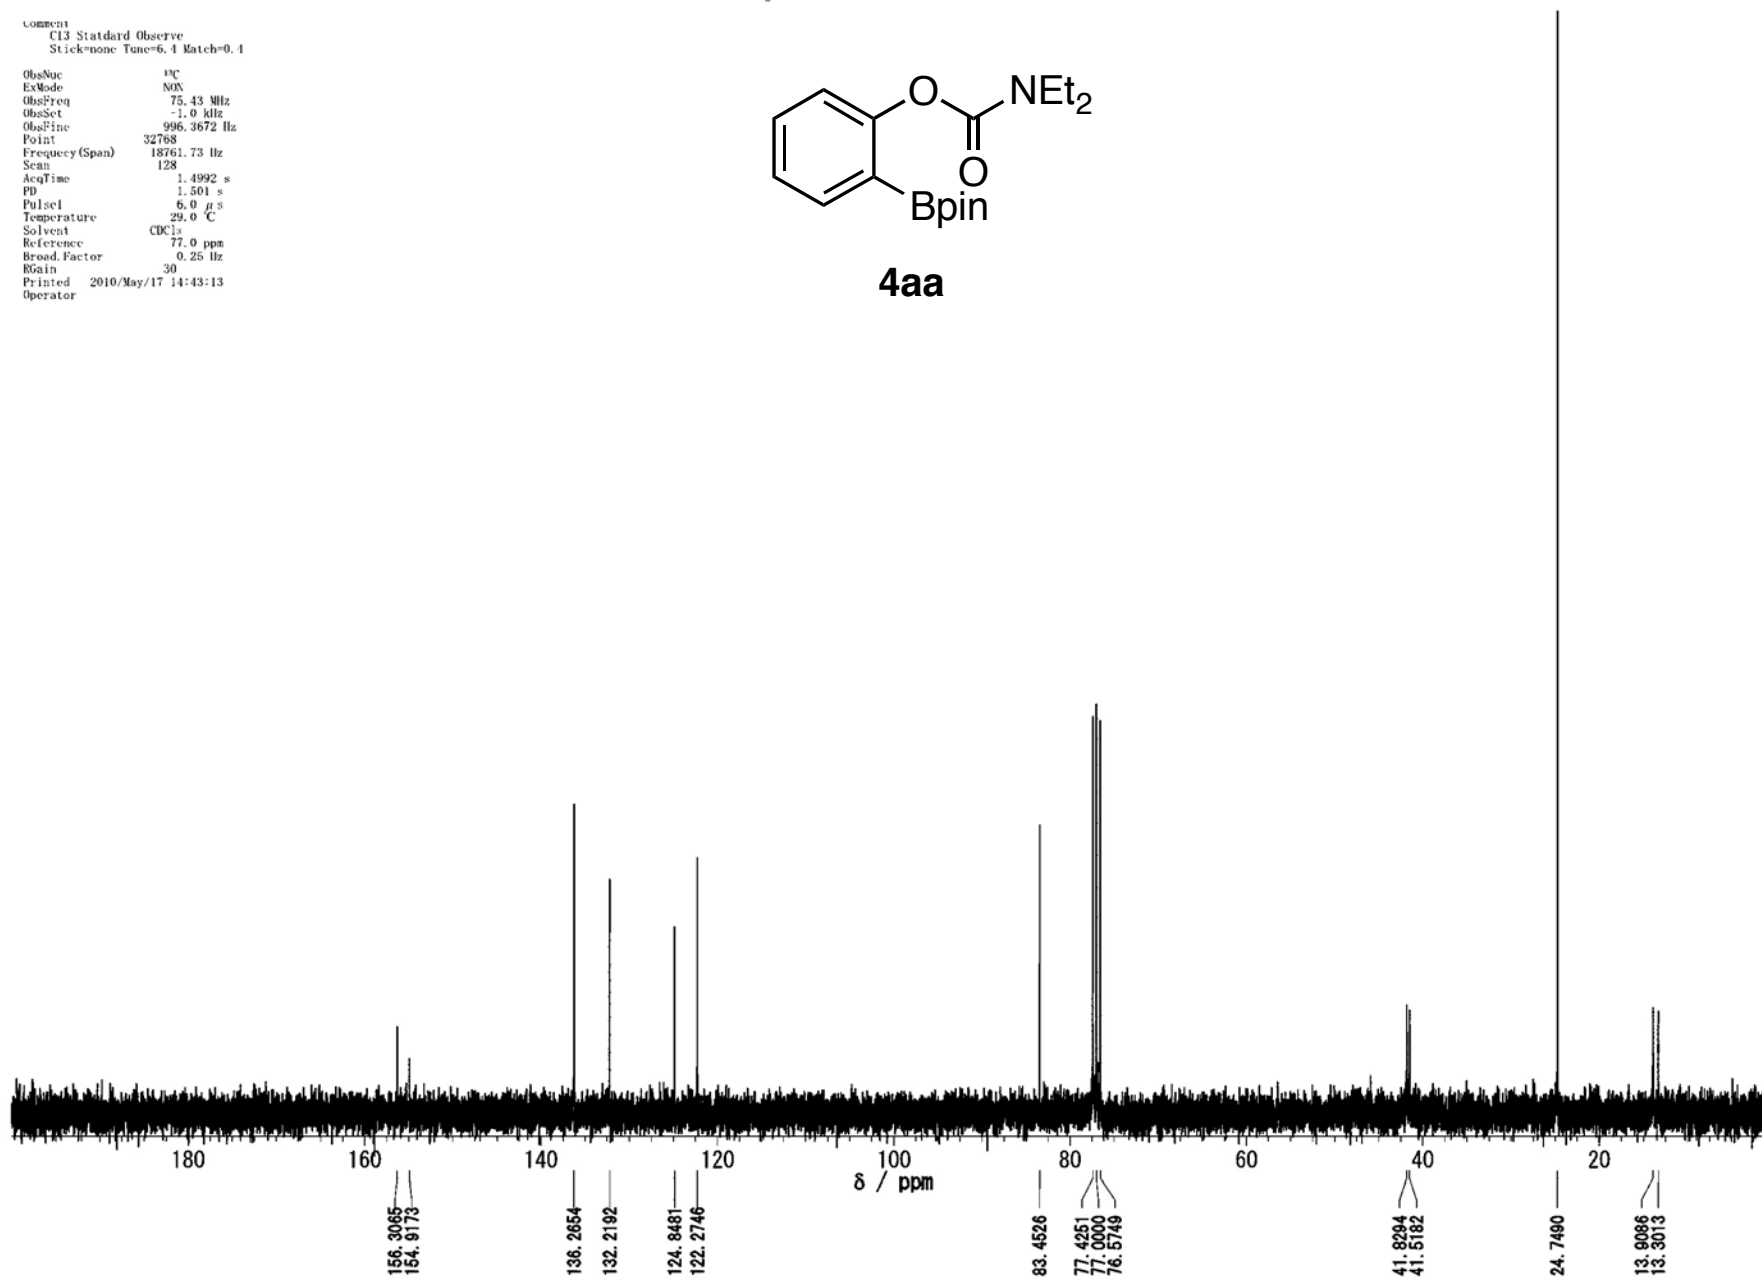

Original File:  
 Date Apr 20 10  
 Comment STANDARD 1H OBSERVE  
 ObsNuc <sup>1</sup>H  
 ExMode NON  
 ObsFreq 299.96 MHz  
 ObsSet 1.0 kHz  
 ObsPine 995.0047 Hz  
 Point 16384  
 Frequency (Span) 4500.45 Hz  
 Scan 16  
 AcqTime 3.4983 s  
 PD 1.502 s  
 Pulse 6.0  $\mu$ s  
 Temperature 29.0  $^{\circ}$ C  
 Solvent CDCl<sub>3</sub>  
 Reference 0.0 ppm  
 Broad. Factor 0.1373 Hz  
 RGain 30  
 Printed 2010/Jun/24 14:46:25  
 Operator

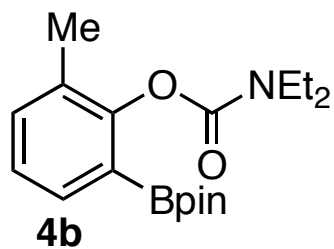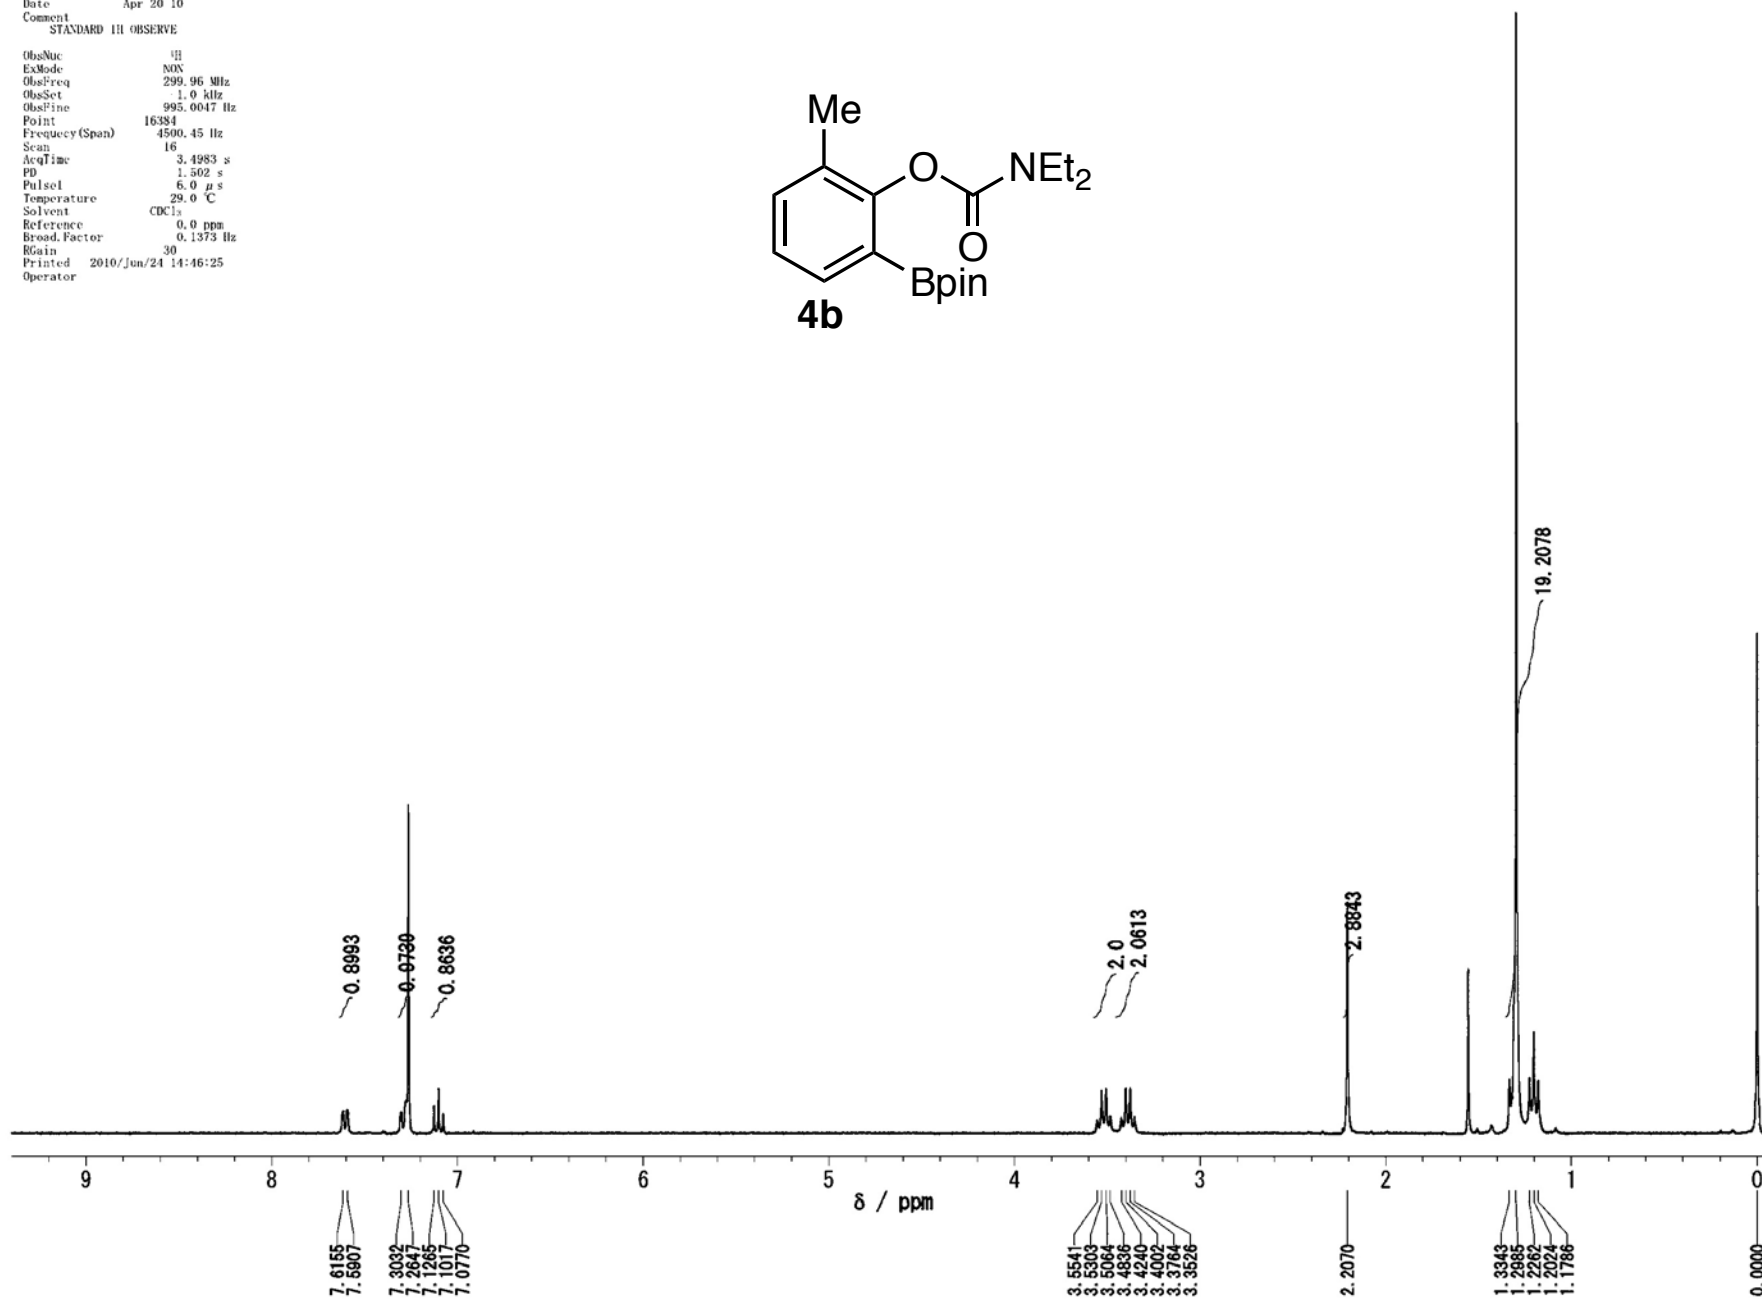

Original File: Apr 27 10  
 Date  
 Comment  
 C13 Standard Observe  
 Stick\*none Tune=6.4 Match=0.4

ObsNuc  $^{13}\text{C}$   
 ExMode NOX  
 ObsFreq 75.43 MHz  
 ObsSet 1.0 kHz  
 ObsFine 996.3672 Hz  
 Point 32768  
 Frequency (Span) 18761.73 Hz  
 Scan 64  
 AcqTime 1.4992 s  
 PD 1.501 s  
 Pulse1 6.0  $\mu$ s  
 Temperature 29.0  $^{\circ}\text{C}$   
 Solvent  $\text{CDCl}_3$   
 Reference 77.0 ppm  
 Broad.Factor 0.2863 Hz  
 RGain 30  
 Printed 2010/May/02 13:09:00  
 Operator

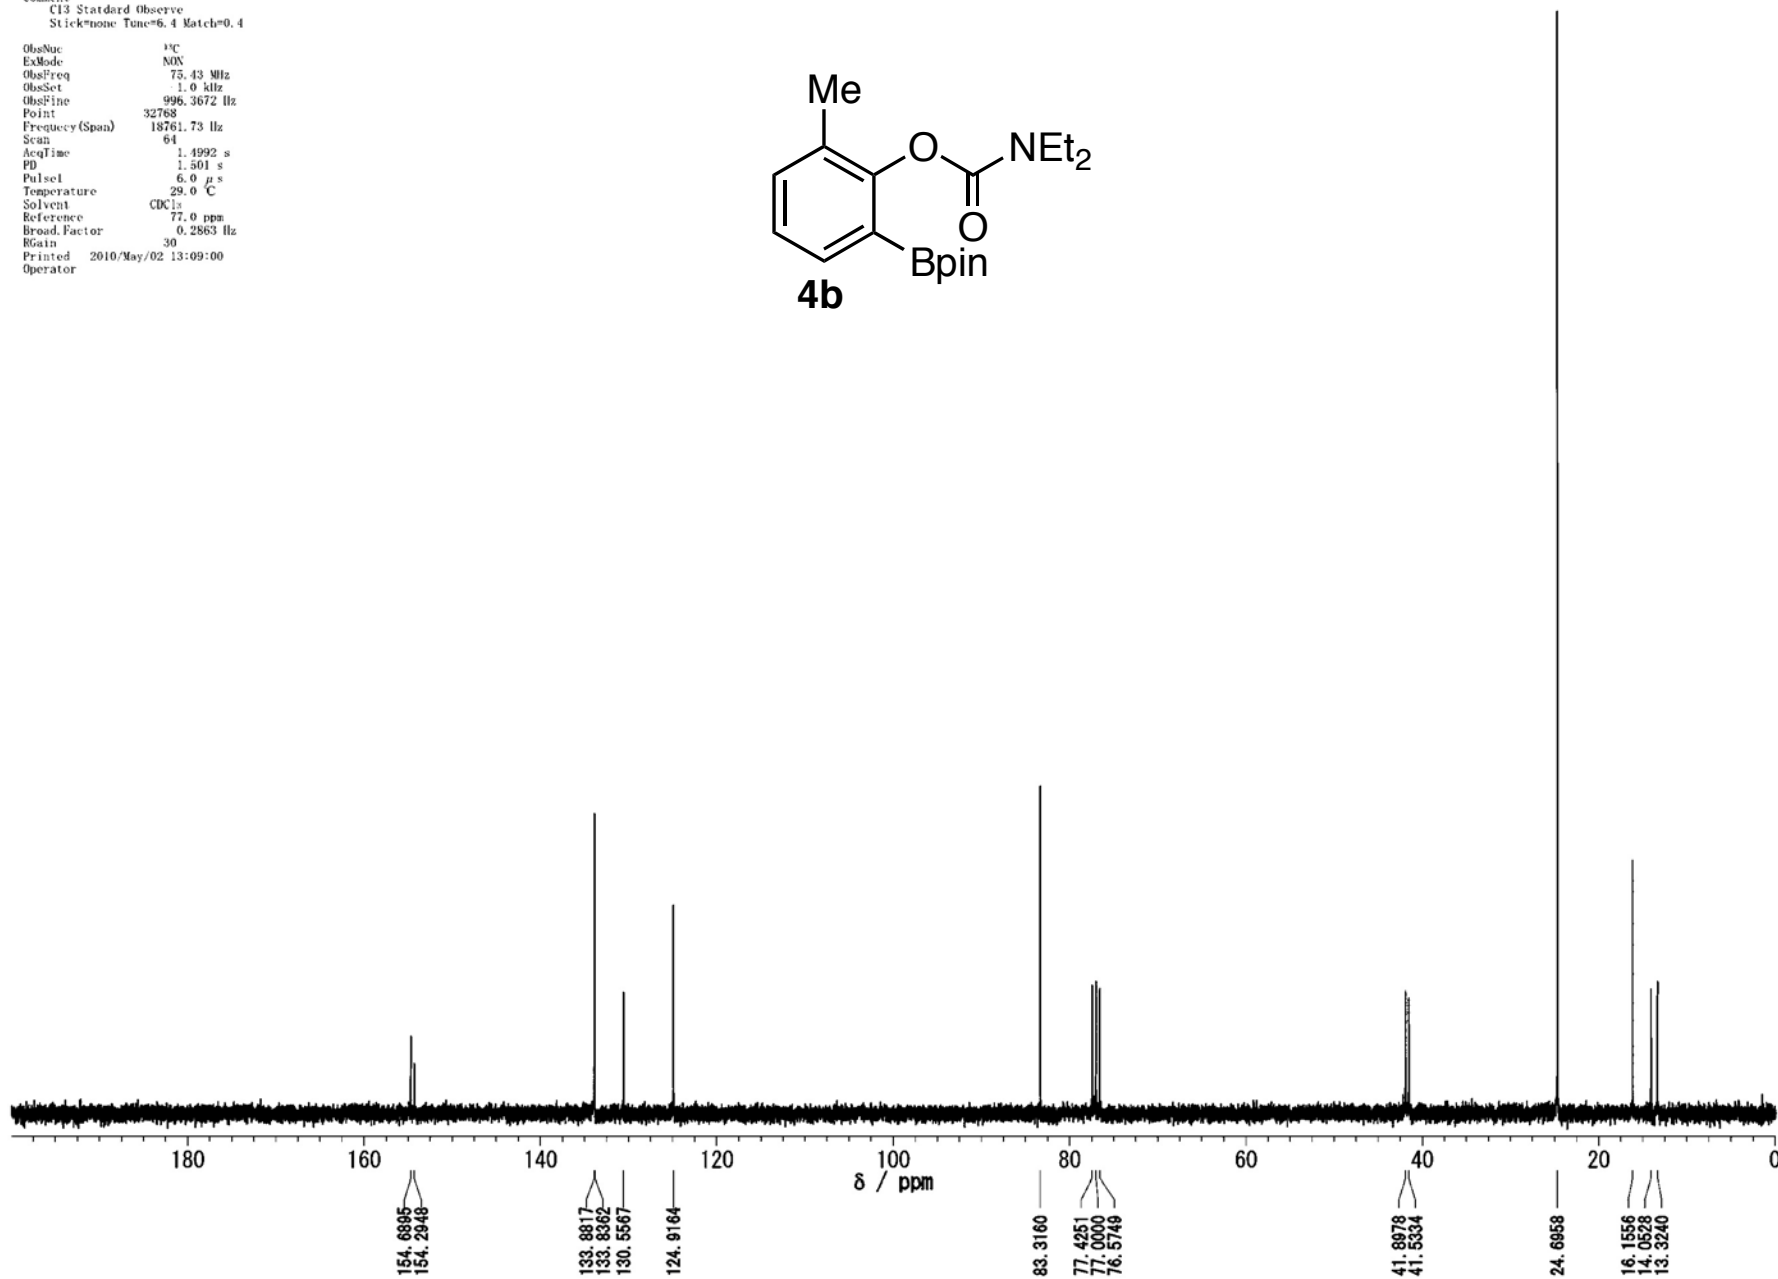

Original File: Dec 7 09  
 Date  
 Comment STANDARD 1H OBSERVE  
 ObsNuc <sup>1</sup>H  
 ExMode NON  
 ObsFreq 299.96 MHz  
 ObsSet 1.0 kHz  
 ObsPine 995.0047 Hz  
 Point 16384  
 Frequency (Span) 4500.45 Hz  
 Scan 16  
 AcqTime 3.4983 s  
 PD 1.502 s  
 Pulse 6.0  $\mu$ s  
 Temperature 29.0  $^{\circ}$ C  
 Solvent CDCl<sub>3</sub>  
 Reference 0.0 ppm  
 Broad. Factor 0.1373 Hz  
 RGain 24  
 Printed 2010/Jun/24 14:48:11  
 Operator

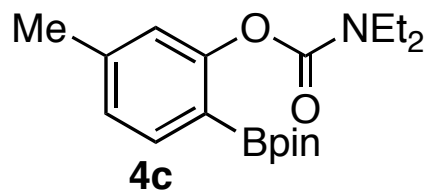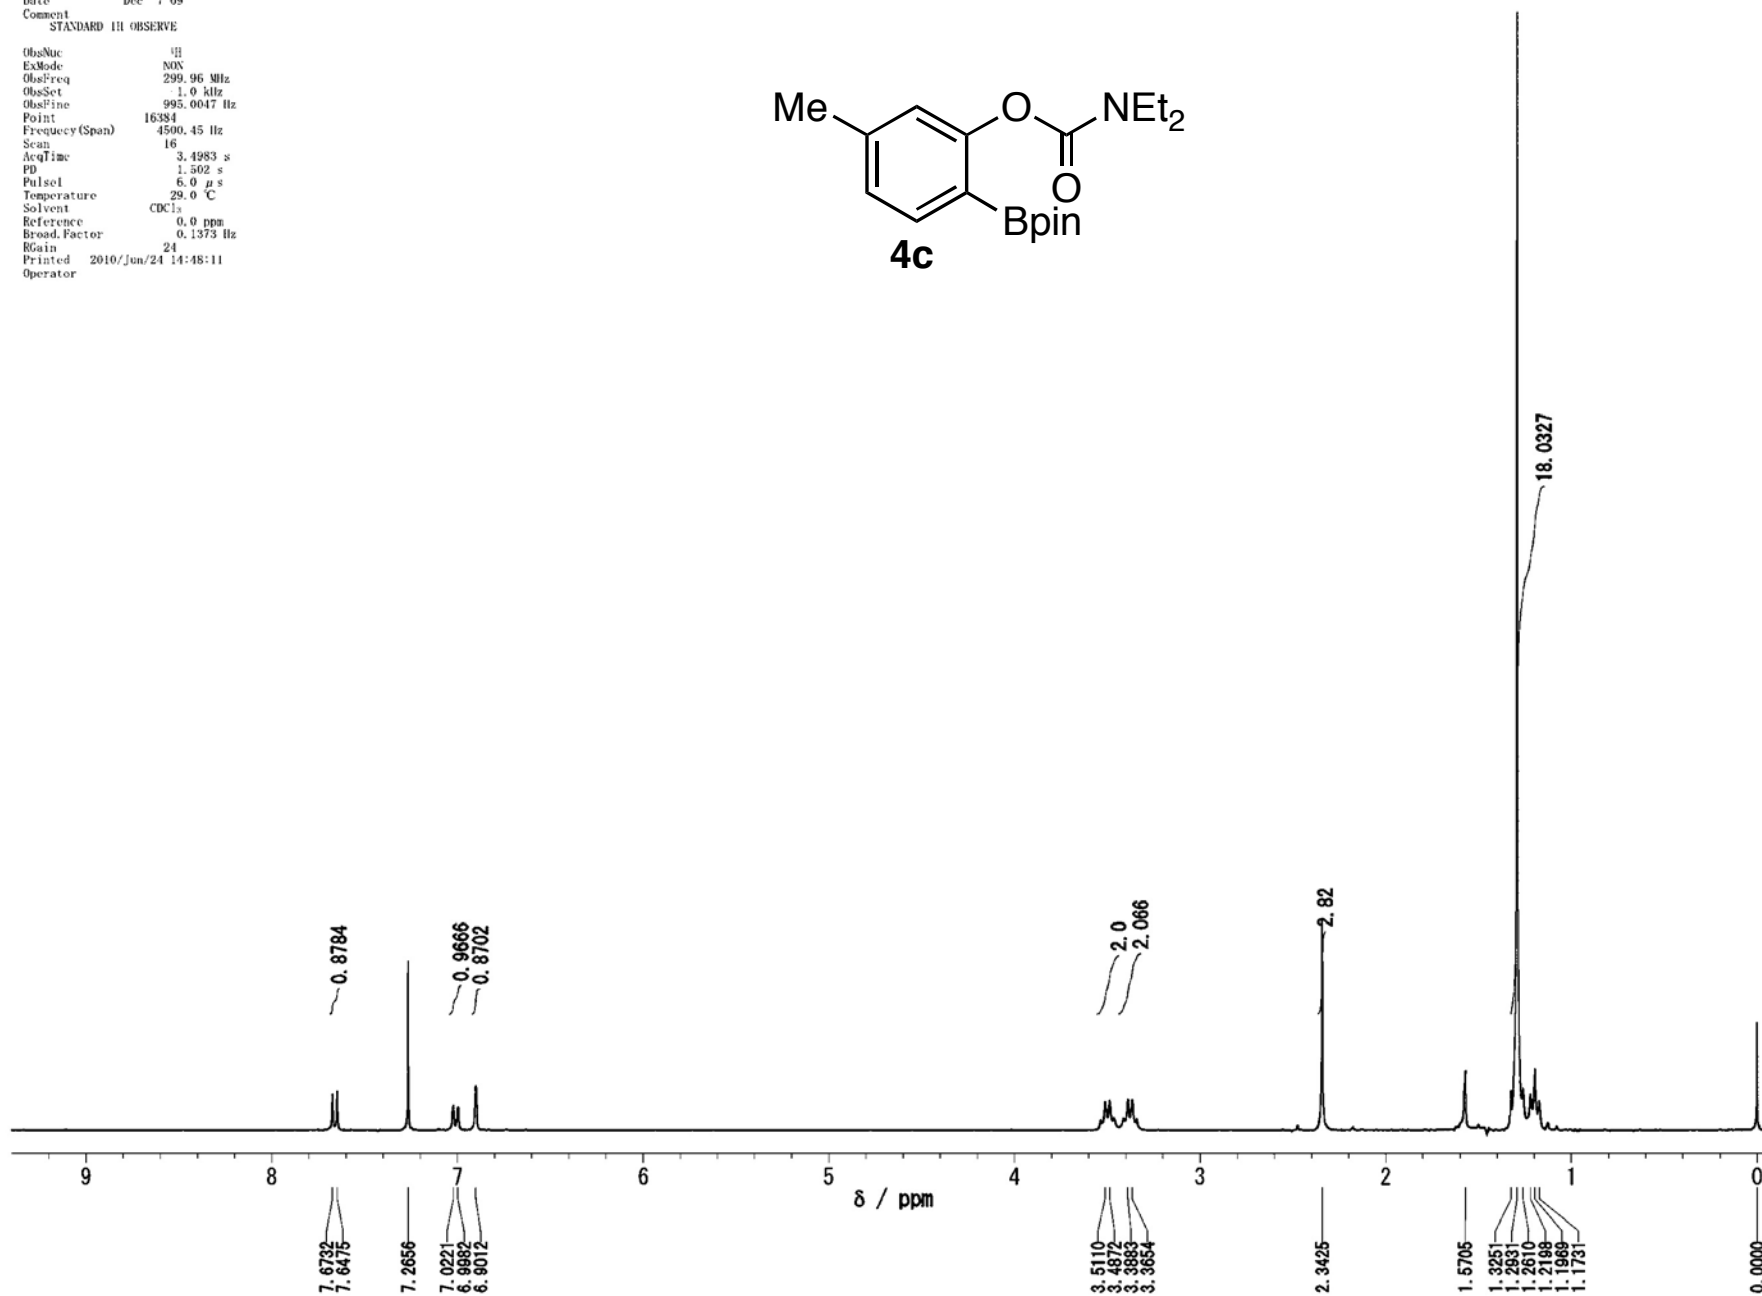

Original File:  
Date Feb 19 10  
Comment  
C13 Standard Observe  
Stick\*none Tune=6.4 Match=0.4

ObsNuc  $^{13}\text{C}$   
ExMode NOX  
ObsFreq 75.43 MHz  
ObsSet 1.0 kHz  
ObsFine 996.3672 Hz  
Point 32768  
Frequency (Span) 18761.73 Hz  
Scan 128  
AcqTime 1.4992 s  
PD 1.501 s  
Pulse1 6.0  $\mu\text{s}$   
Temperature 29.0  $^{\circ}\text{C}$   
Solvent  $\text{CDCl}_3$   
Reference 77.0 ppm  
BroadFactor 0.2863 Hz  
RGain 30  
Printed 2010/May/02 13:16:55  
Operator

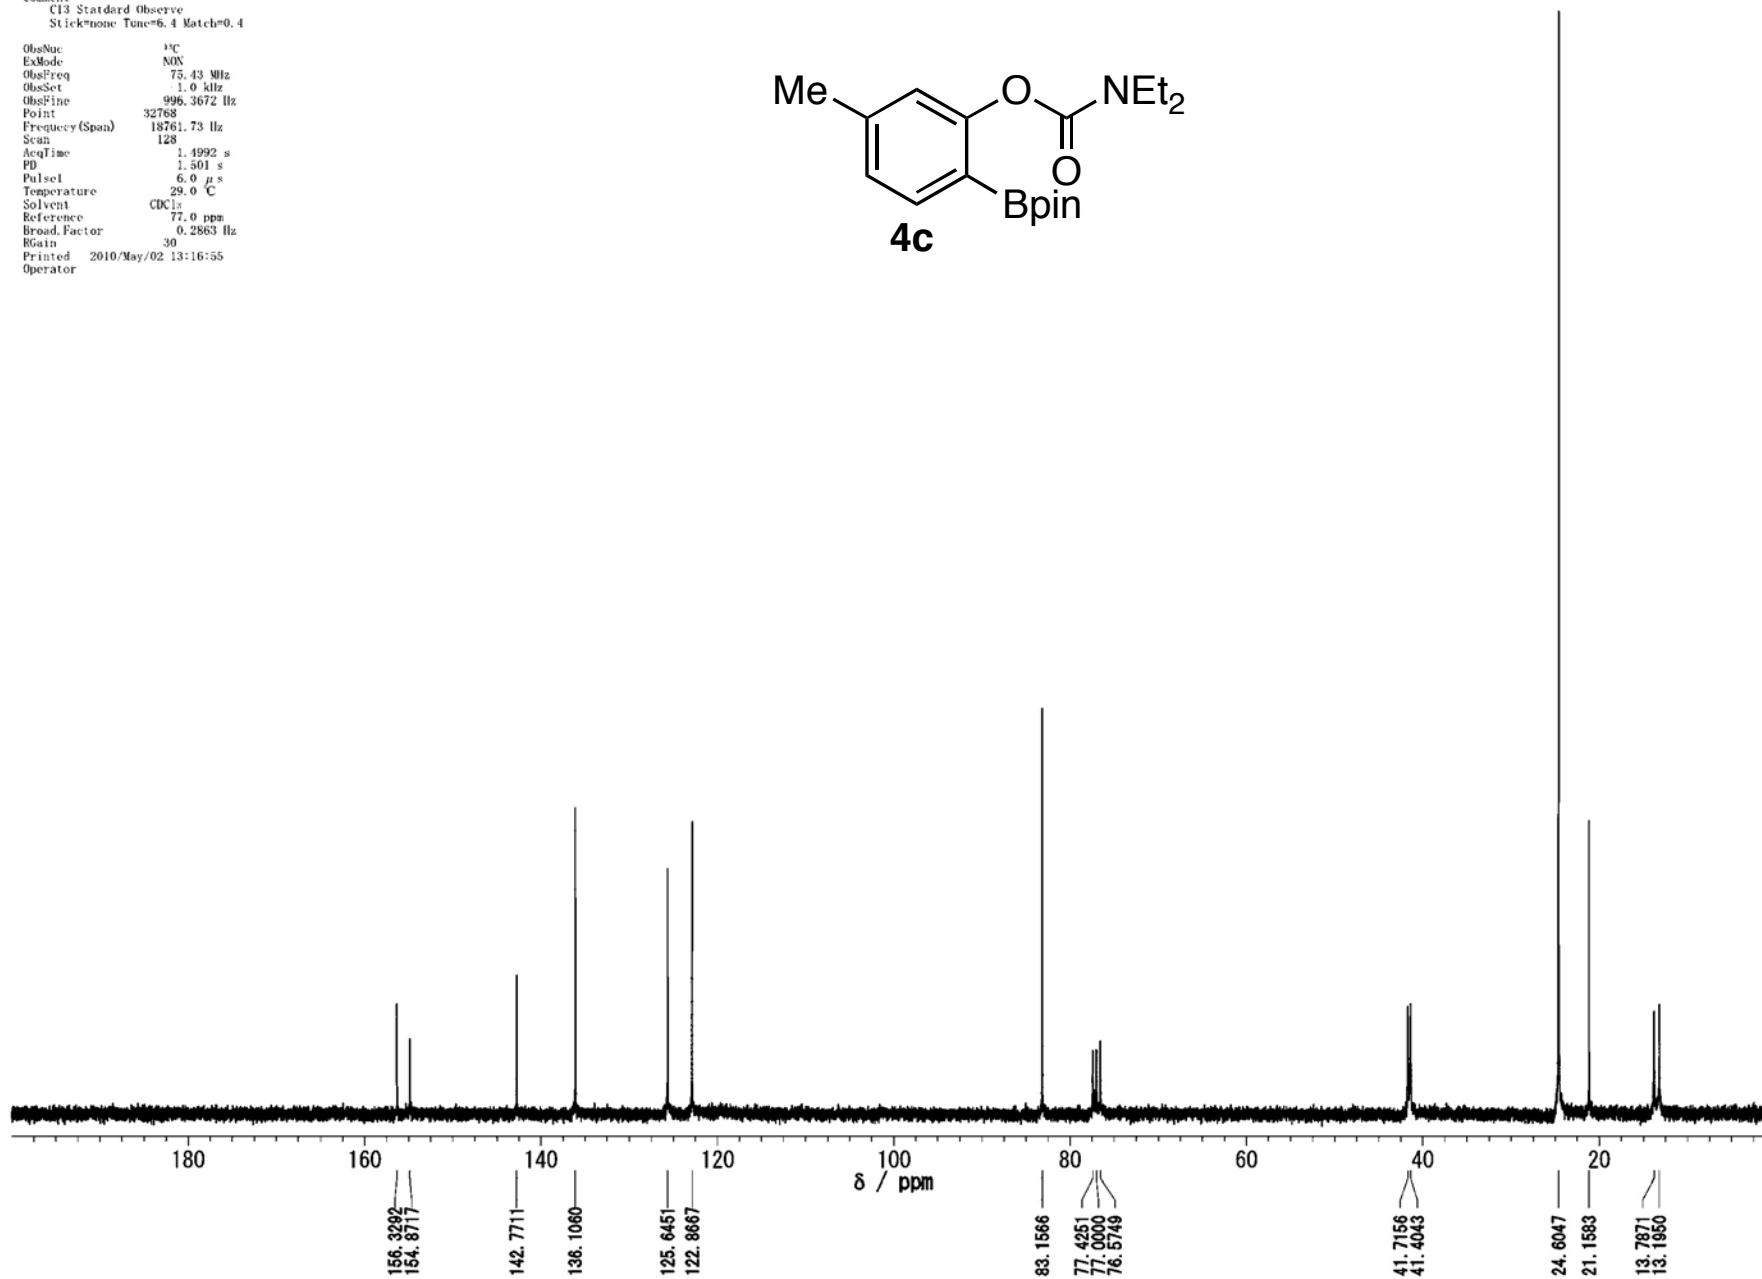

Original File: Nov 28 09  
 Date: Nov 28 09  
 Comment: STANDARD 1H OBSERVE  
 ObsNuc:  $^1\text{H}$   
 ExMode: NON  
 ObsFreq: 299.96 MHz  
 ObsSet: 1.0 kHz  
 ObsPine: 995.0047 Hz  
 Point: 16384  
 Frequency (Span): 4500.45 Hz  
 Scan: 16  
 AcqTime: 3.4983 s  
 PD: 1.502 s  
 Pulse1: 6.0  $\mu$ s  
 Temperature: 29.0  $^{\circ}\text{C}$   
 Solvent:  $\text{CDCl}_3$   
 Reference: 0.0 ppm  
 Broad. Factor: 0.1373 Hz  
 RGain: 20  
 Printed: 2010/May/02 13:20:56  
 Operator:

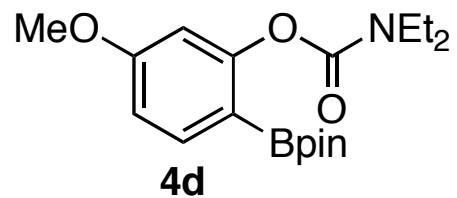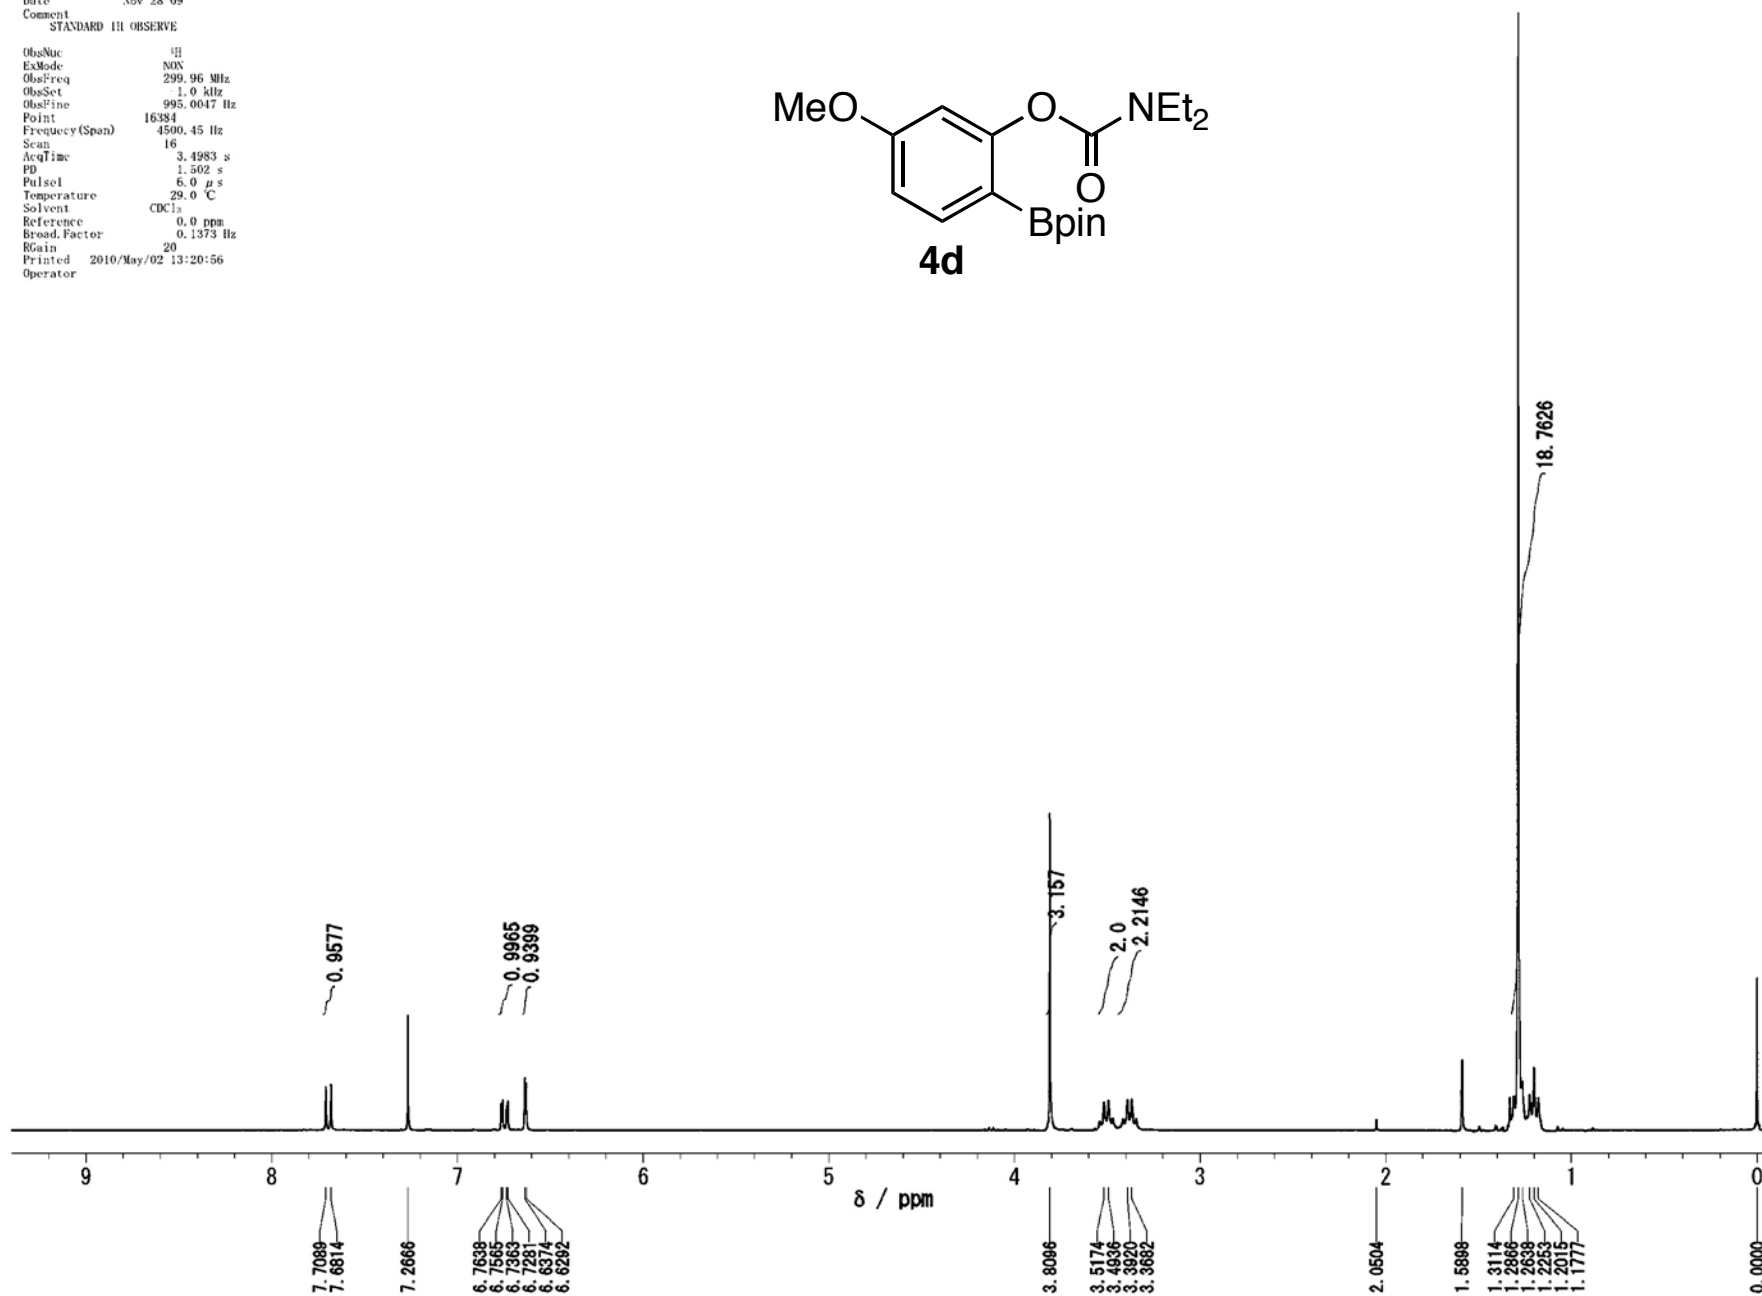

Original File:  
Date Feb 20 10  
Comment  
C13 Standard Observe  
Stick\*none Tune\*6.4 Match\*0.4

ObsNuc  $^{13}\text{C}$   
ExMode NOX  
ObsFreq 75.43 MHz  
ObsSet 1.0 kHz  
ObsFine 996.3672 Hz  
Point 32768  
Frequency (Span) 18761.73 Hz  
Scan 128  
AcqTime 1.4992 s  
PD 1.501 s  
Pulse1 6.0  $\mu\text{s}$   
Temperature 29.0  $^{\circ}\text{C}$   
Solvent  $\text{CDCl}_3$   
Reference 77.0 ppm  
BroadFactor 0.2863 Hz  
RGain 30  
Printed 2010/May/02 13:24:48  
Operator

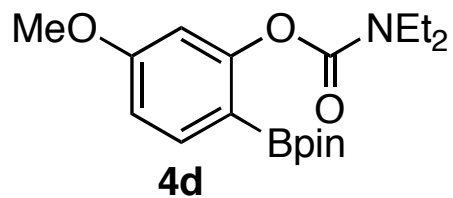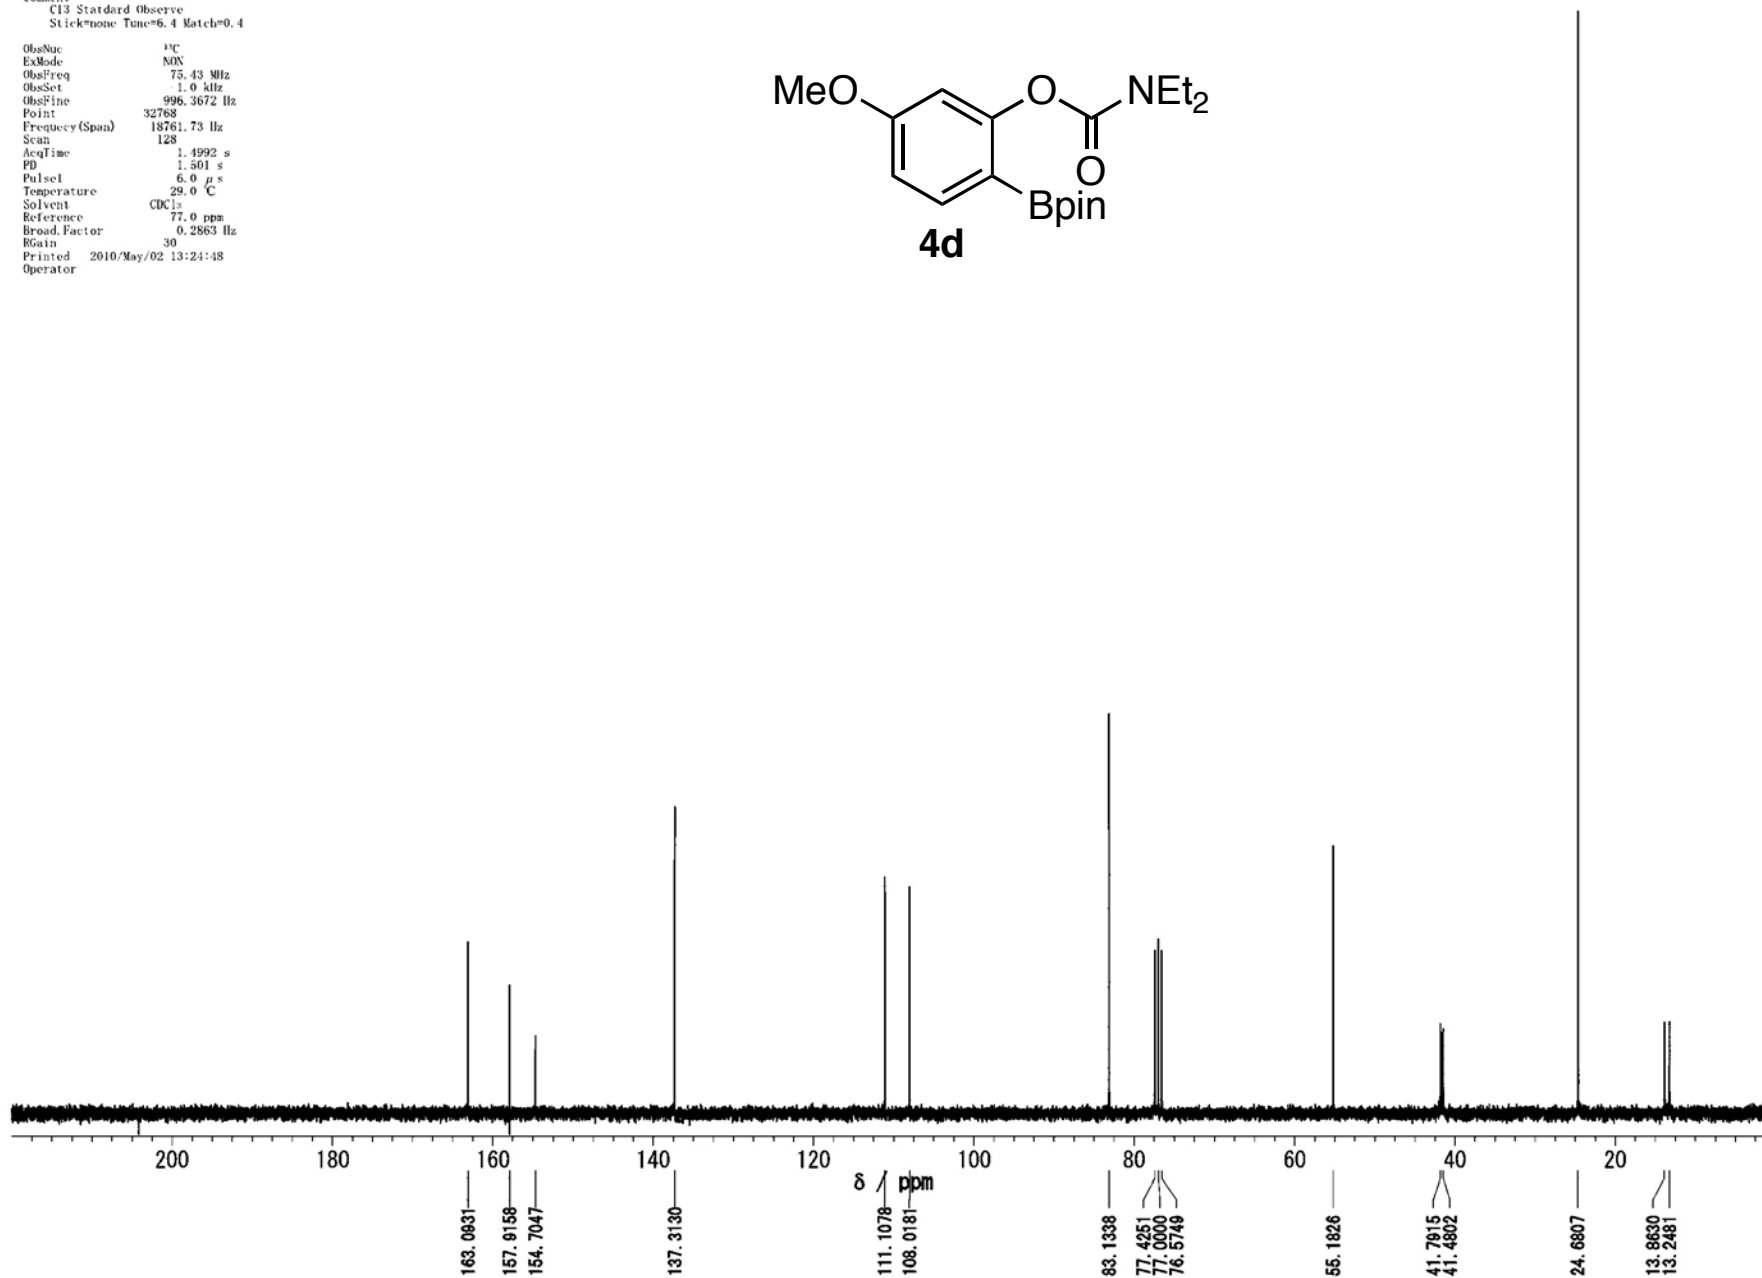

Original File: Nov 27 09  
 Date: Nov 27 09  
 Comment: STANDARD 1H OBSERVE  
 ObsNuc:  $^1\text{H}$   
 ExMode: NON  
 ObsFreq: 299.96 MHz  
 ObsSet: 1.0 kHz  
 ObsPine: 995.0047 Hz  
 Point: 16384  
 Frequency (Span): 4500.45 Hz  
 Scan: 16  
 AcqTime: 3.4983 s  
 PD: 1.502 s  
 Pulse: 6.0  $\mu$ s  
 Temperature: 29.0  $^{\circ}\text{C}$   
 Solvent:  $\text{CDCl}_3$   
 Reference: 0.0 ppm  
 Broad. Factor: 0.1373 Hz  
 RGain: 30  
 Printed: 2010/May/02 13:29:56  
 Operator:

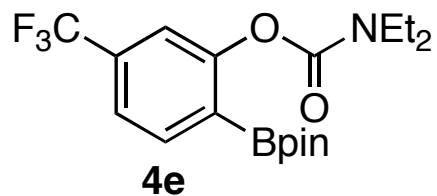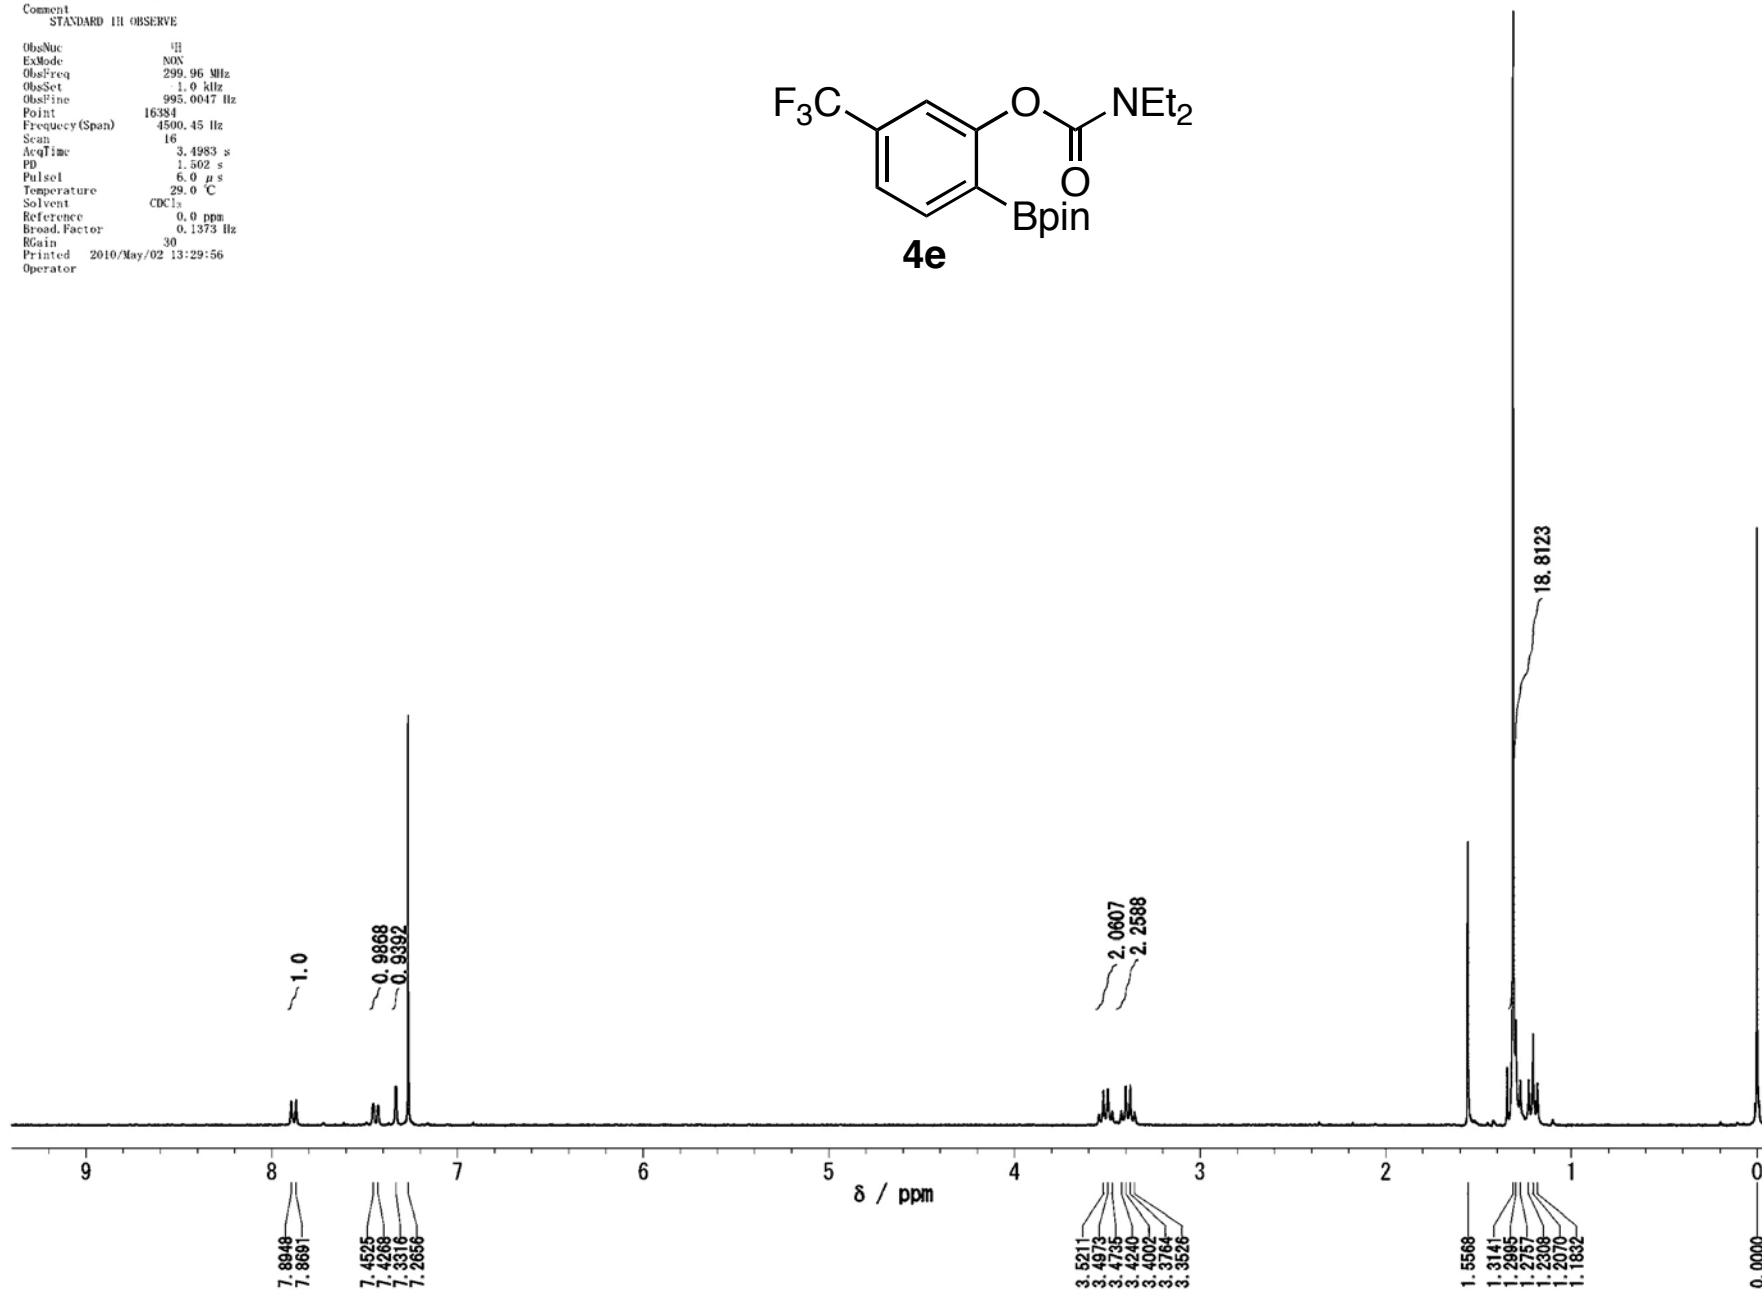



Original File:  
 Date 09/Nov/2027 00:00:00  
 Comment  
 C13 Standard Observe  
 Stick\*none Tune=6.4 Match=0.4

ObsNuc <sup>13</sup>C  
 ExMode NOX  
 ObsFreq 75.43 MHz  
 ObsSet -1.0 kHz  
 ObsFine 996.3672 Hz  
 Point 32768  
 Frequency (Span) 18761.73 Hz  
 Scan 320  
 AcqTime 1.4992 s  
 PD 1.501 s  
 Pulse1 6.0 μs  
 Temperature 29.0 °C  
 Solvent CDCl<sub>3</sub>  
 Reference 77.0 ppm  
 Broad.Factor 0.2863 Hz  
 RGain 30  
 Printed 2010/Jun/24 14:53:39  
 Operator

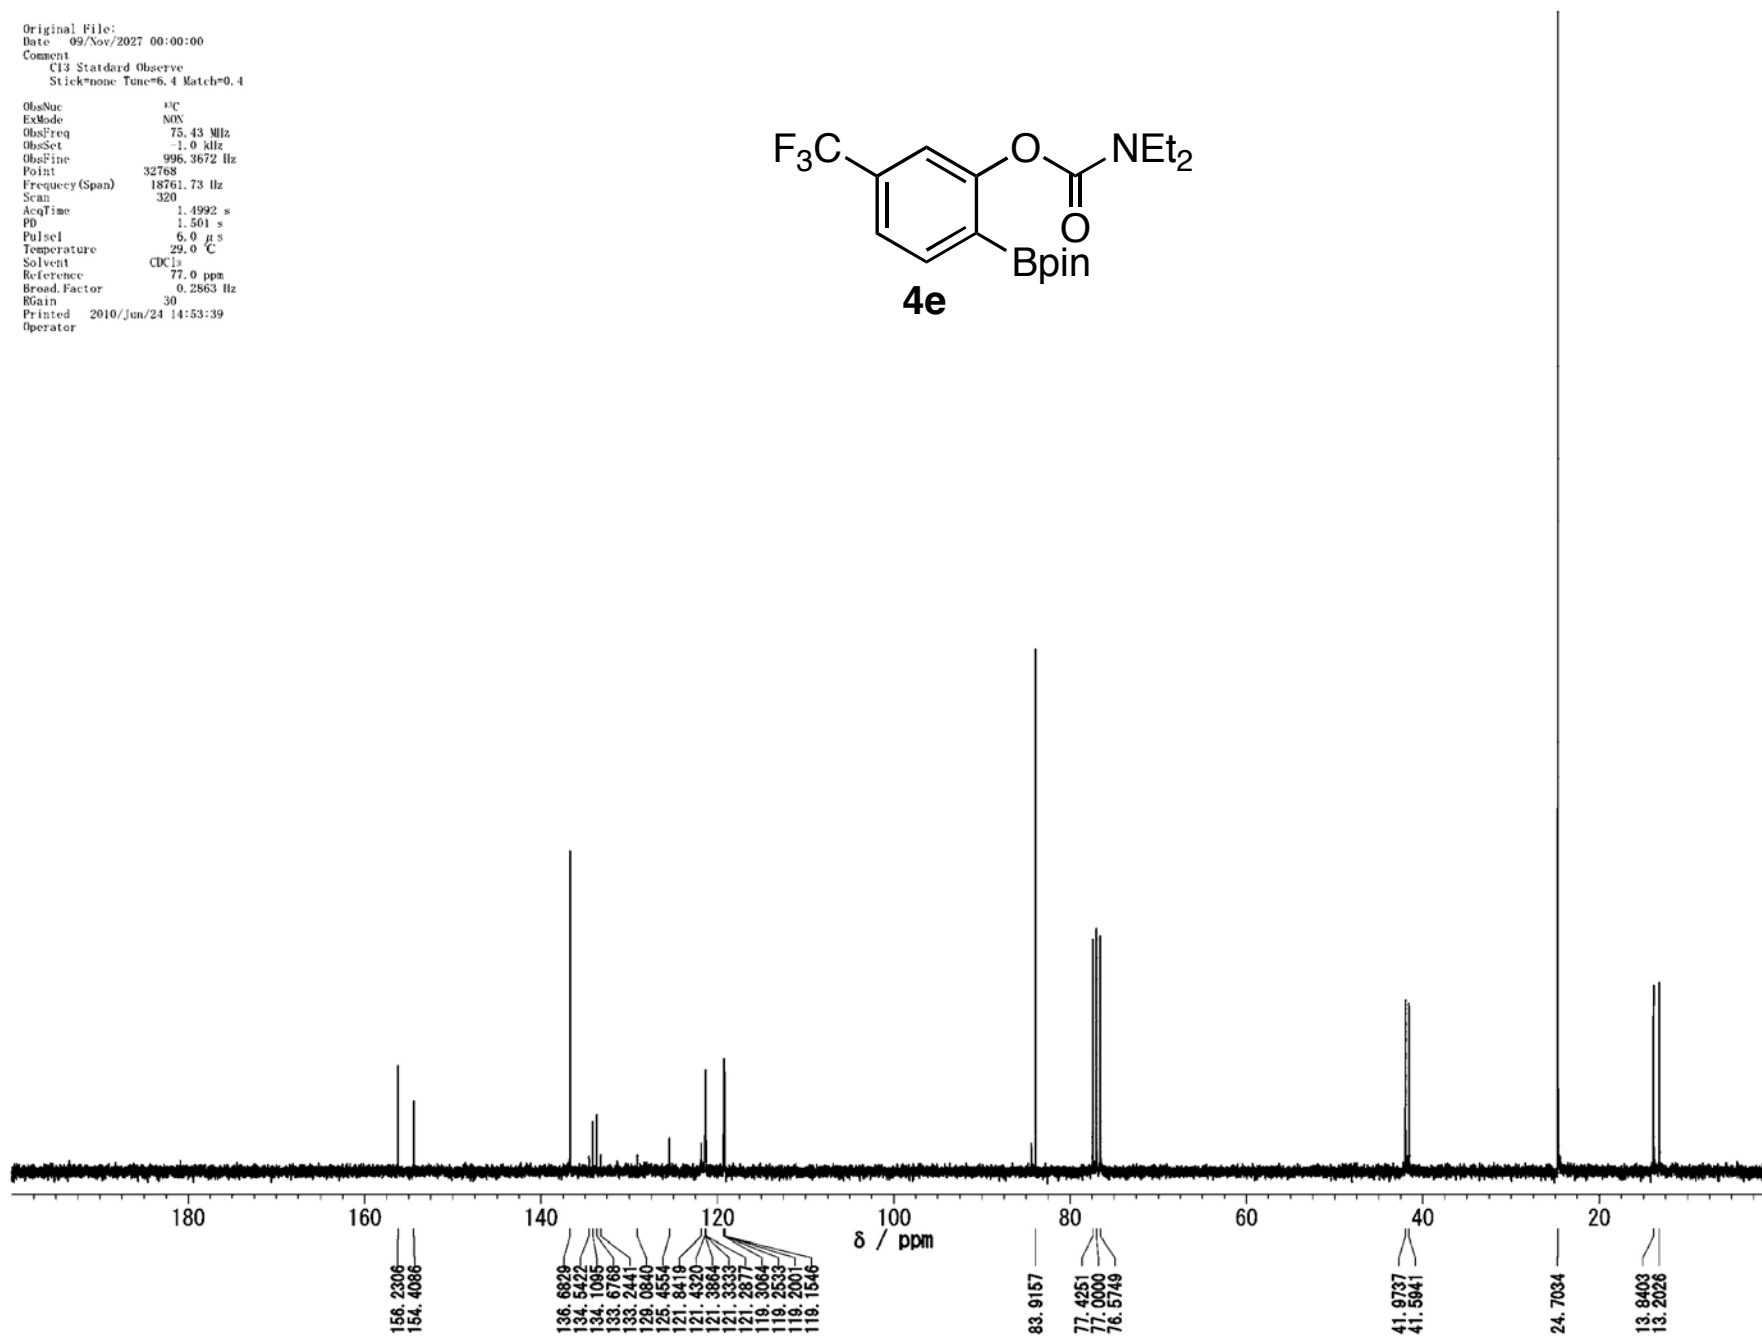

Original File:   
 Date: Nov 27 09   
 Comment: STANDARD 1H OBSERVE   
 ObsNuc:  $^1\text{H}$    
 ExMode: NON   
 ObsFreq: 299.96 MHz   
 ObsSet: 1.0 kHz   
 ObsPine: 995.0047 Hz   
 Point: 16384   
 Frequency (Span): 4500.45 Hz   
 Scan: 16   
 AcqTime: 3.4983 s   
 PD: 1.502 s   
 Pulse: 6.0  $\mu\text{s}$    
 Temperature: 29.0  $^{\circ}\text{C}$    
 Solvent:  $\text{CDCl}_3$    
 Reference: 0.0 ppm   
 Broad. Factor: 0.1373 Hz   
 RGain: 24   
 Printed: 2010/May/02 14:25:17   
 Operator:

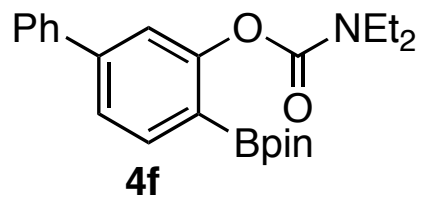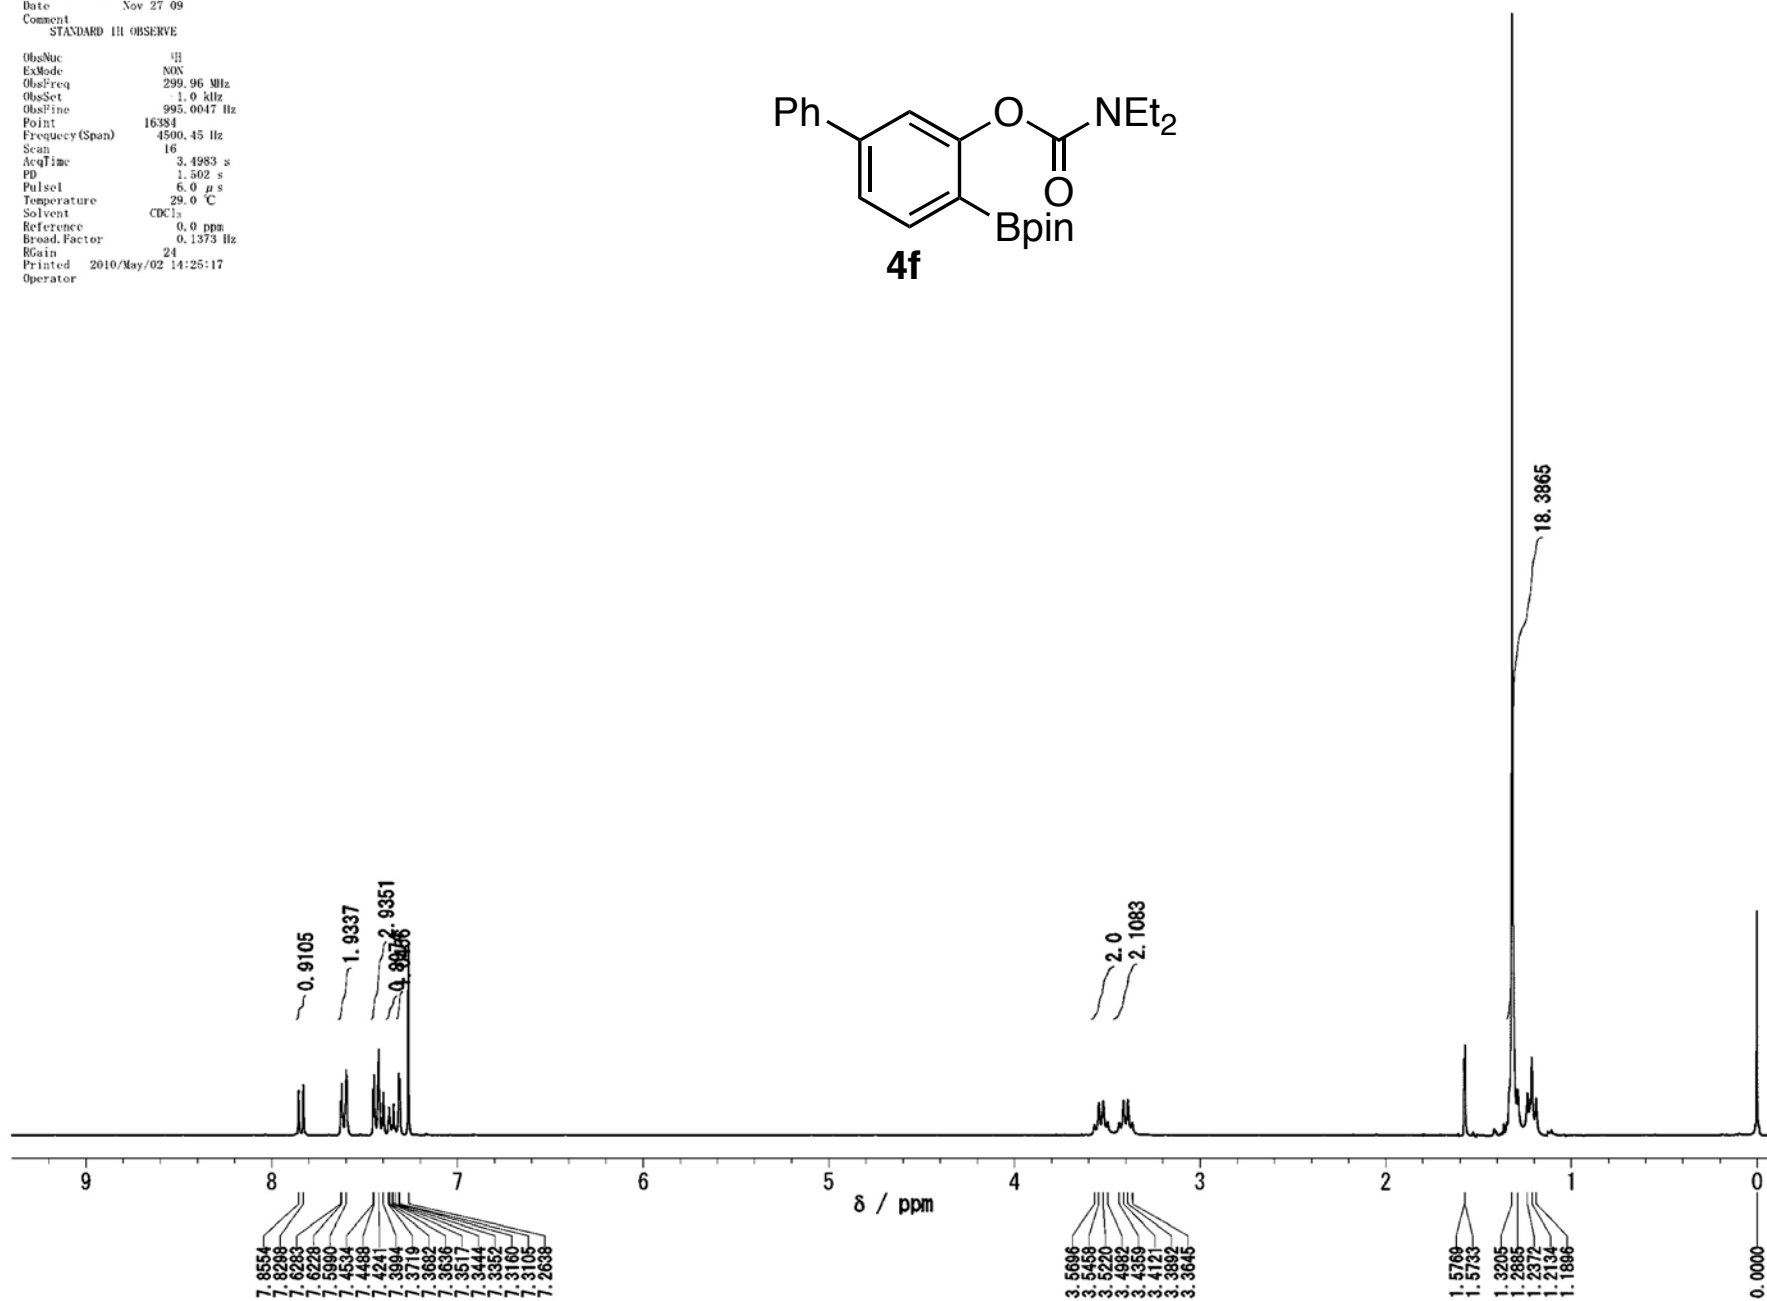

Original File:  
Date Feb 22 10  
Comment  
C13 Standard Observe  
Stick\*none Tune\*6.4 Match\*0.4

ObsNuc  $^{13}\text{C}$   
ExMode NOX  
ObsFreq 75.43 MHz  
ObsSet 1.0 kHz  
ObsFine 996.3672 Hz  
Point 32768  
Frequency (Span) 18761.73 Hz  
Scan 128  
AcqTime 1.4992 s  
PD 1.501 s  
Pulse1 6.0  $\mu\text{s}$   
Temperature 29.0  $^{\circ}\text{C}$   
Solvent  $\text{CDCl}_3$   
Reference 77.0 ppm  
BroadFactor 0.2863 Hz  
RGain 30  
Printed 2010/May/02 14:27:17  
Operator

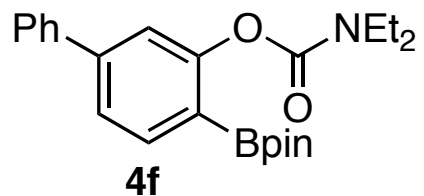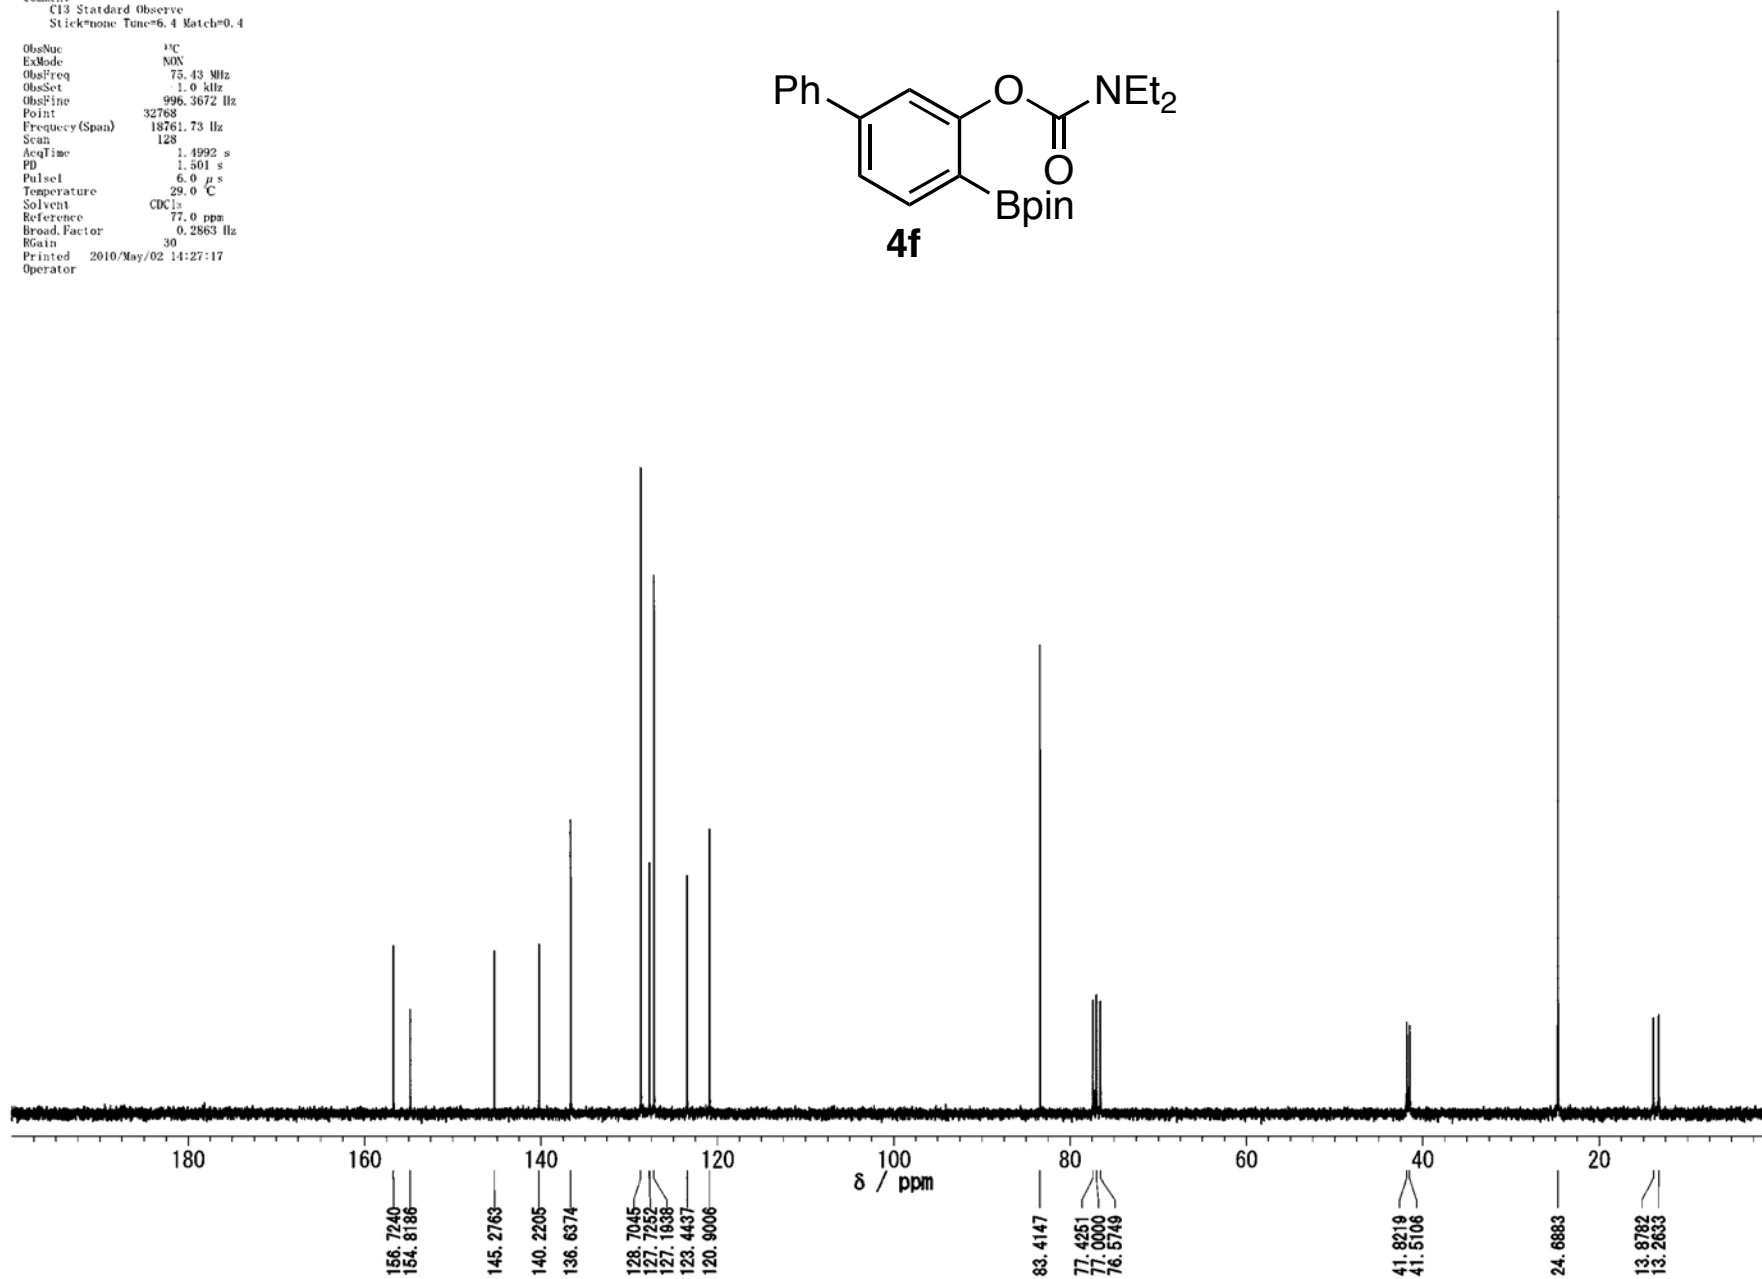

Original File: Dec 8 09  
 Date  
 Comment: STANDARD 1H OBSERVE  
 ObsNuc: <sup>1</sup>H  
 ExMode: NON  
 ObsFreq: 299.96 MHz  
 ObsSet: 1.0 kHz  
 ObsPine: 995.0047 Hz  
 Point: 16384  
 Frequency (Span): 4500.45 Hz  
 Scan: 16  
 AcqTime: 3.4983 s  
 PD: 1.502 s  
 Pulse1: 6.0 μs  
 Temperature: 29.0 °C  
 Solvent: CDCl<sub>3</sub>  
 Reference: 0.0 ppm  
 Broad. Factor: 0.1373 Hz  
 RGain: 24  
 Printed: 2010/May/02 14:32:26  
 Operator

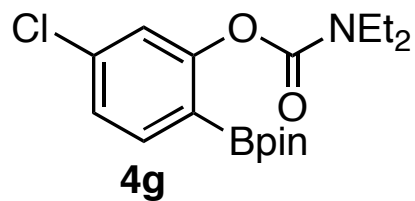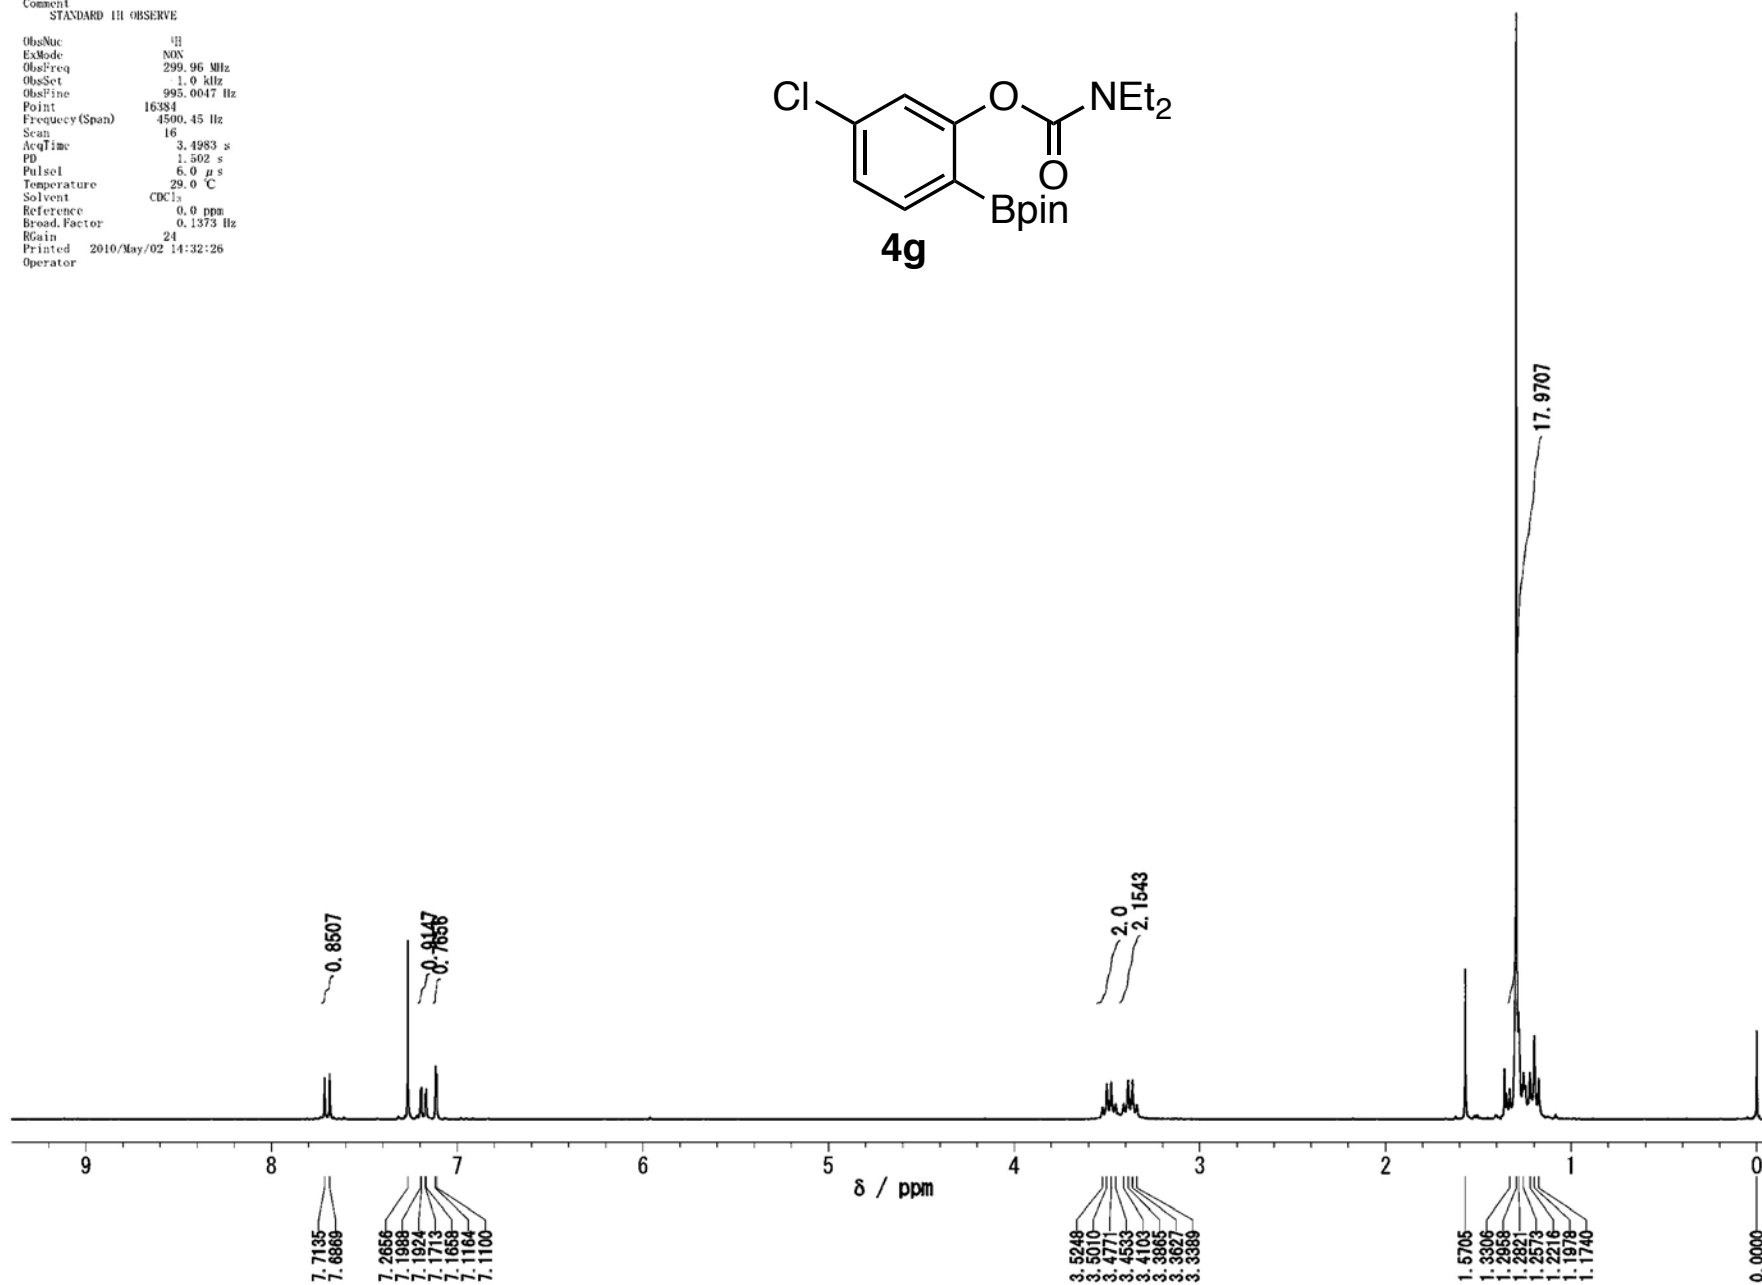

Original File:  
 Date Feb 20 10  
 Comment  
 C13 Statdard Observe  
 Stick\*none Tune=6.4 Match=0.4

ObsNuc  $^{13}\text{C}$   
 ExMode NOX  
 ObsFreq 75.43 MHz  
 ObsSet 1.0 kHz  
 ObsFine 996.3672 Hz  
 Point 32768  
 Frequency (Span) 18761.73 Hz  
 Scan 64  
 AcqTime 1.4992 s  
 PD 1.501 s  
 Pulse1 6.0  $\mu$ s  
 Temperature 29.0  $^{\circ}\text{C}$   
 Solvent  $\text{CDCl}_3$   
 Reference 77.0 ppm  
 Broad.Factor 0.2863 Hz  
 RGain 30  
 Printed 2010/May/02 14:33:48  
 Operator

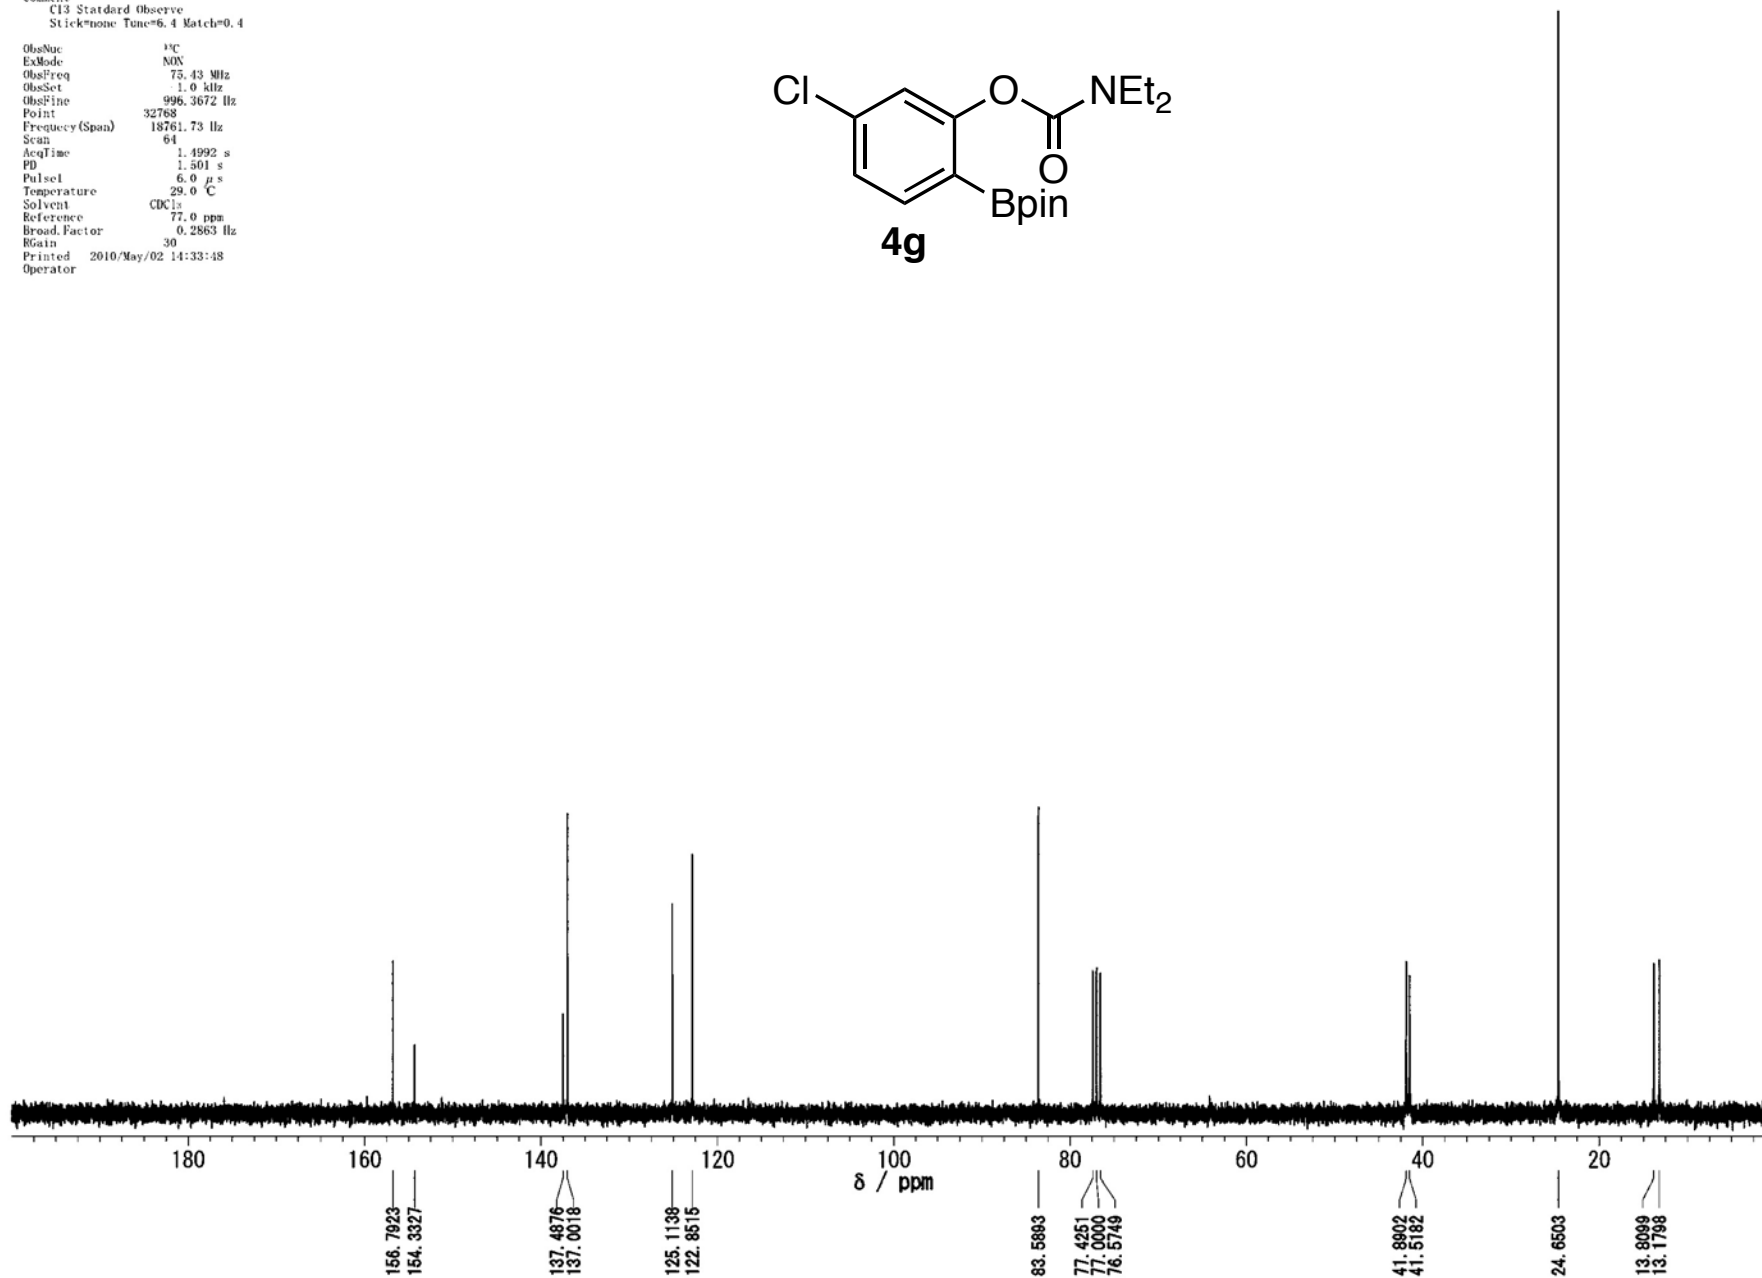

Original File:   
 Date: Feb 23 10   
 Comment: STANDARD 1H OBSERVE   
 ObsNuc: <sup>1</sup>H   
 ExMode: NON   
 ObsFreq: 299.96 MHz   
 ObsSet: 1.0 kHz   
 ObsPine: 995.0047 Hz   
 Point: 16384   
 Frequency (Span): 4500.45 Hz   
 Scan: 16   
 AcqTime: 3.4983 s   
 PD: 1.502 s   
 Pulse1: 6.0 μs   
 Temperature: 29.0 °C   
 Solvent: CDCl<sub>3</sub>   
 Reference: 0.0 ppm   
 Broad. Factor: 0.1373 Hz   
 RGain: 30   
 Printed: 2010/May/02 14:38:14   
 Operator:

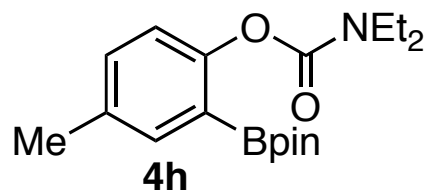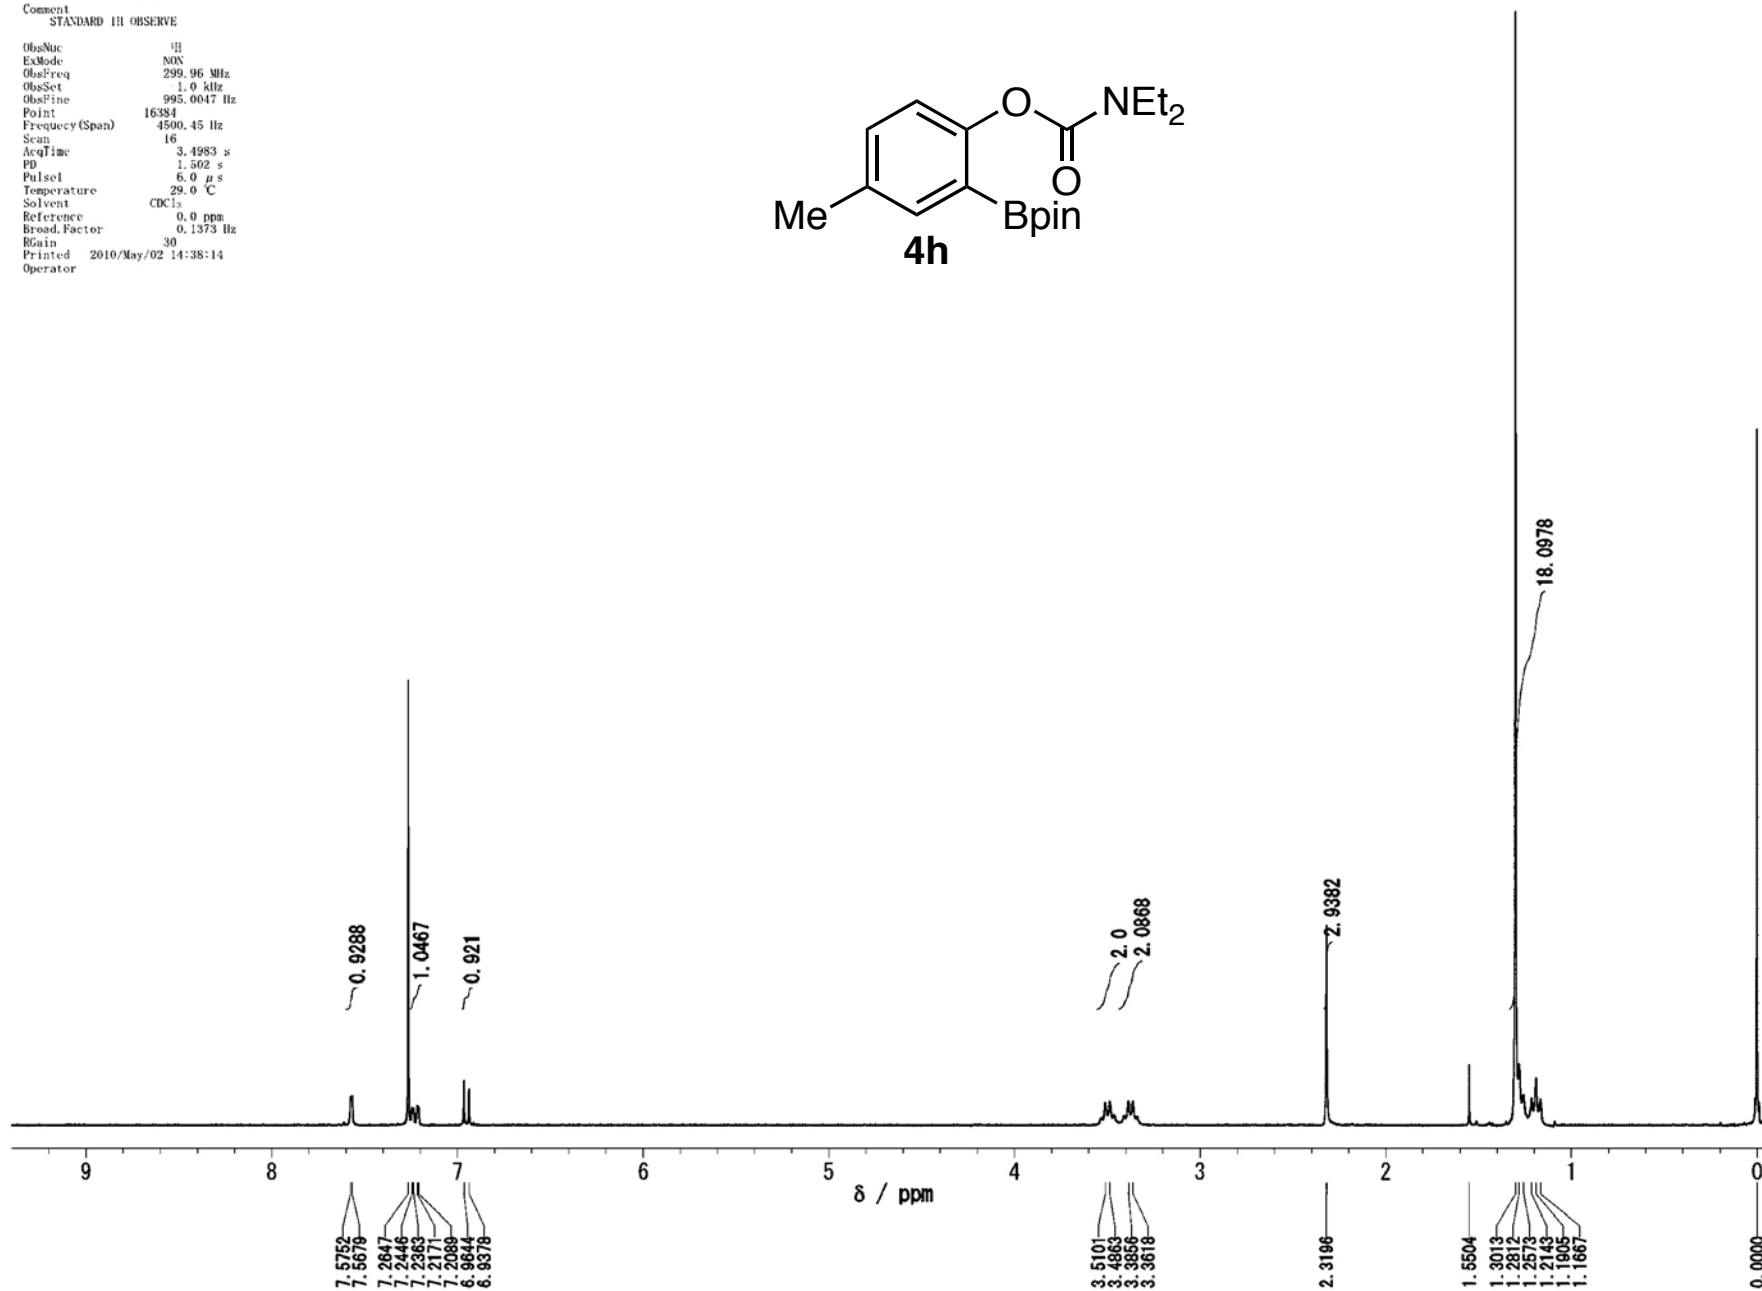

Original File:   
 Date Feb 27 10   
 Comment   
 C13 Standard Observe   
 Stick\*none Tune=6.4 Match=0.4

ObsNuc  $^{13}\text{C}$    
 ExMode NOX   
 ObsFreq 75.43 MHz   
 ObsSet 1.0 kHz   
 ObsFine 996.3672 Hz   
 Point 32768   
 Frequency (Span) 18761.73 Hz   
 Scan 256   
 AcqTime 1.4992 s   
 PD 1.501 s   
 Pulse1 6.0  $\mu\text{s}$    
 Temperature 29.0  $^{\circ}\text{C}$    
 Solvent  $\text{CDCl}_3$    
 Reference 77.0 ppm   
 Broad.Factor 0.2863 Hz   
 RGain 30   
 Printed 2010/May/02 14:42:12   
 Operator

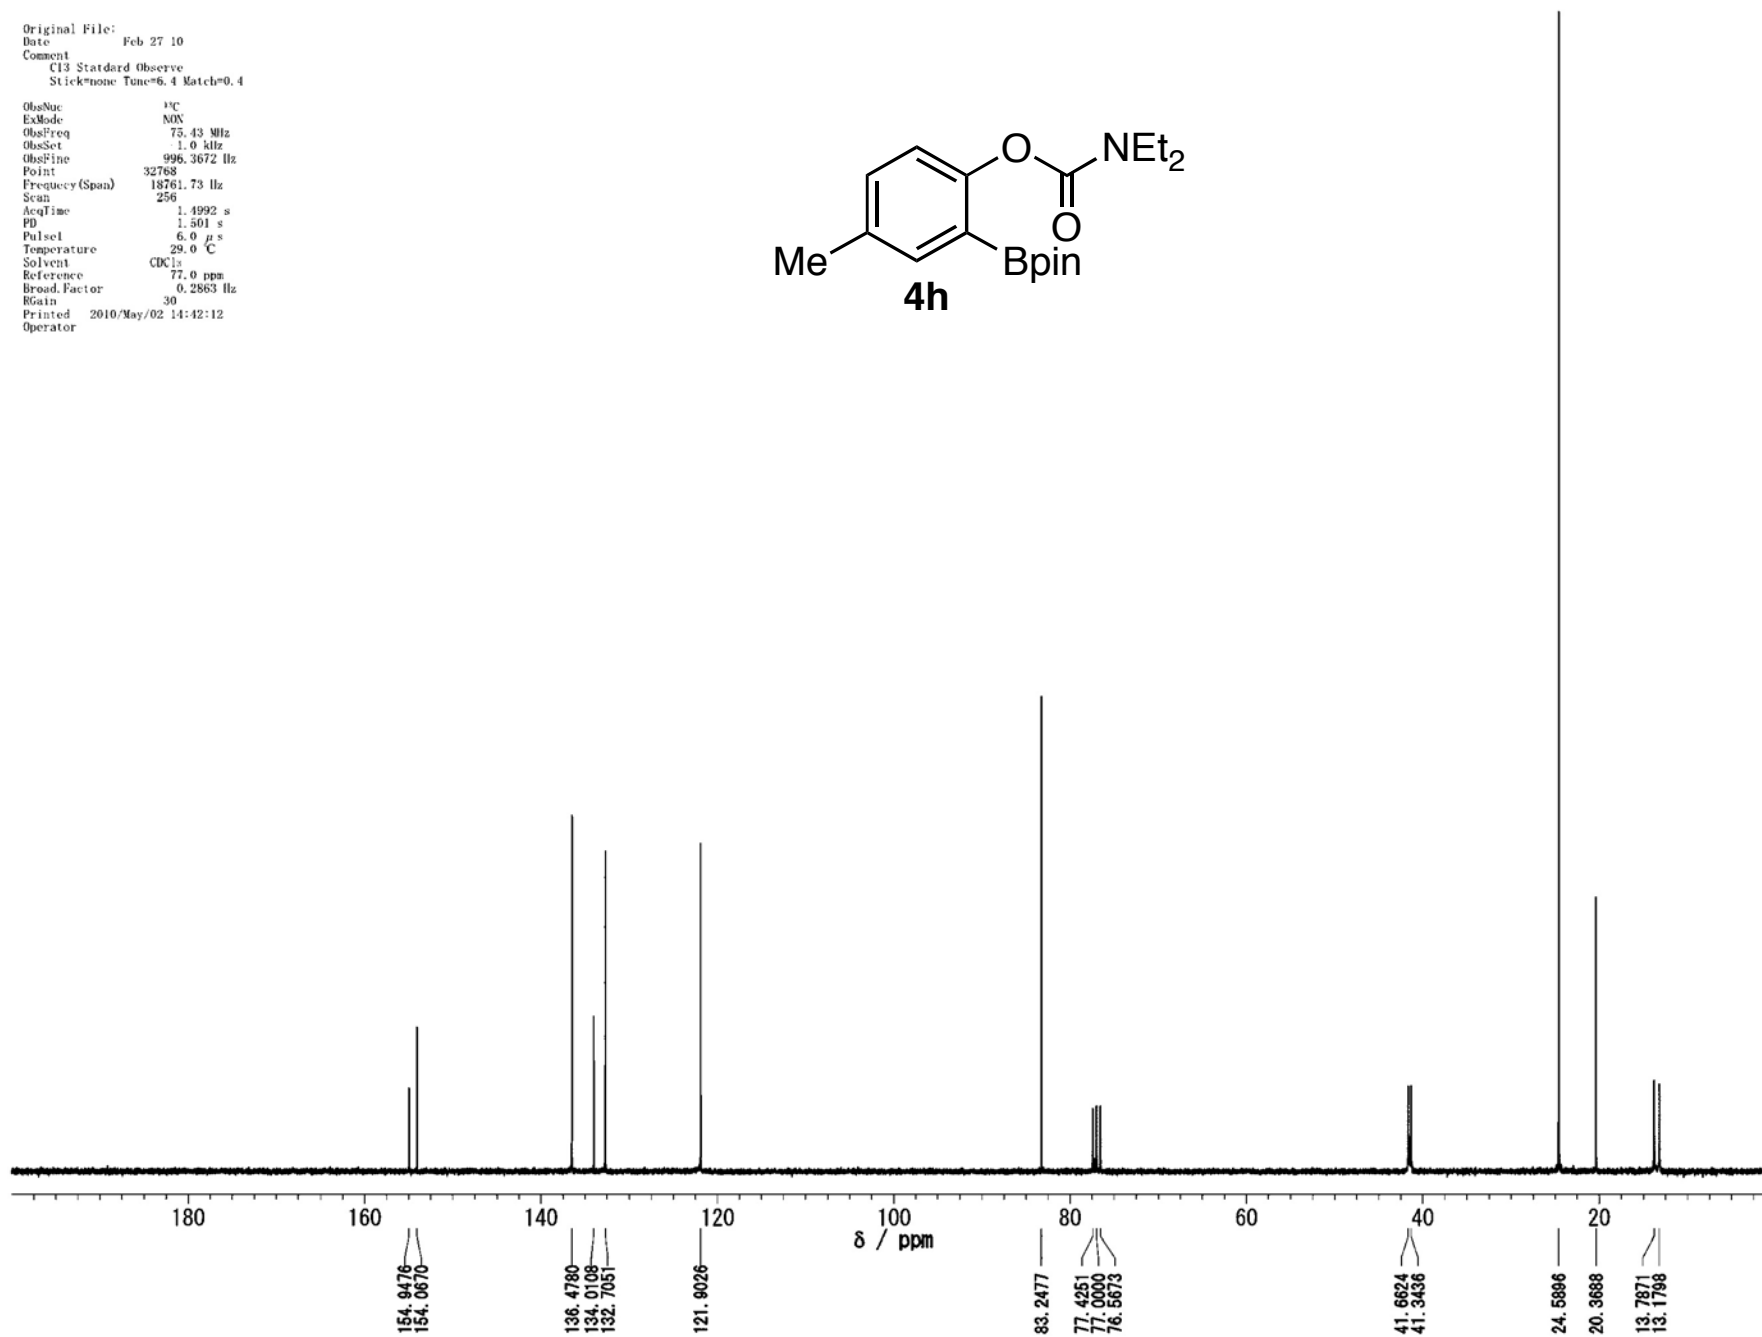

Original File:   
 Date: Oct 21 09   
 Comment: STANDARD 1H OBSERVE   
 ObsNuc:  $^1\text{H}$    
 ExMode: NON   
 ObsFreq: 299.96 MHz   
 ObsSet: 1.0 kHz   
 ObsPine: 995.0047 Hz   
 Point: 16384   
 Frequency (Span): 4500.45 Hz   
 Scan: 16   
 AcqTime: 3.4983 s   
 PD: 1.502 s   
 Pulse1: 6.0  $\mu\text{s}$    
 Temperature: 29.0  $^{\circ}\text{C}$    
 Solvent:  $\text{CDCl}_3$    
 Reference: 0.0 ppm   
 Broad. Factor: 0.1373 Hz   
 RGain: 30   
 Printed: 2010/Jun/24 14:56:54   
 Operator:

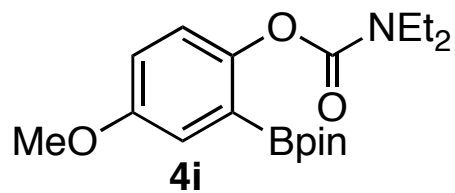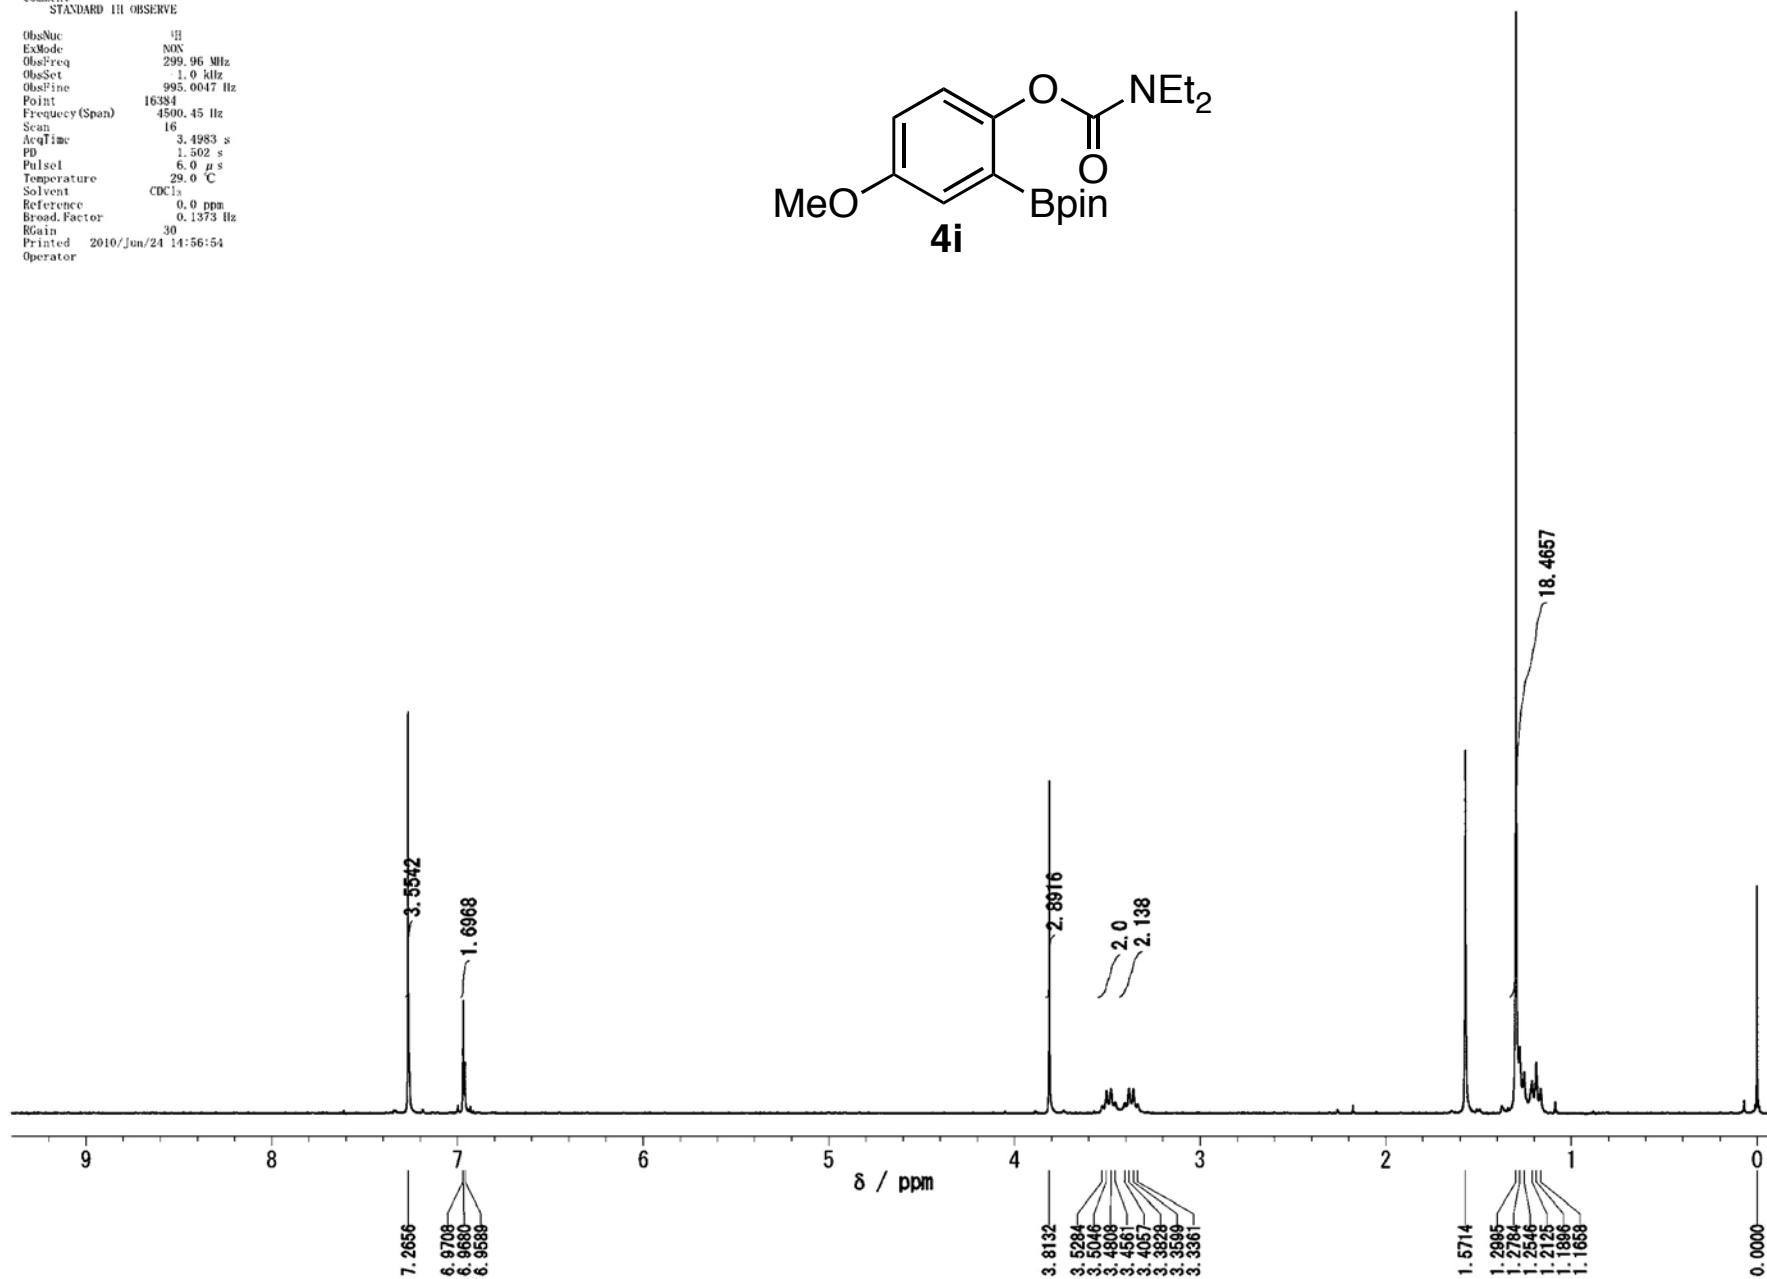



Original File:  
 Date Feb 18 10  
 Comment  
 C13 Standard Observe  
 Stick\*none Tune=6.4 Match=0.4

ObsNuc  $^{13}\text{C}$   
 ExMode NOX  
 ObsFreq 75.43 MHz  
 ObsSet 1.0 kHz  
 ObsFine 996.3672 Hz  
 Point 32768  
 Frequency (Span) 18761.73 Hz  
 Scan 128  
 AcqTime 1.4992 s  
 PD 1.501 s  
 Pulse1 6.0  $\mu\text{s}$   
 Temperature 29.0  $^{\circ}\text{C}$   
 Solvent  $\text{CDCl}_3$   
 Reference 77.0 ppm  
 Broad.Factor 0.2863 Hz  
 RGain 30  
 Printed 2010/May/02 14:48:40  
 Operator

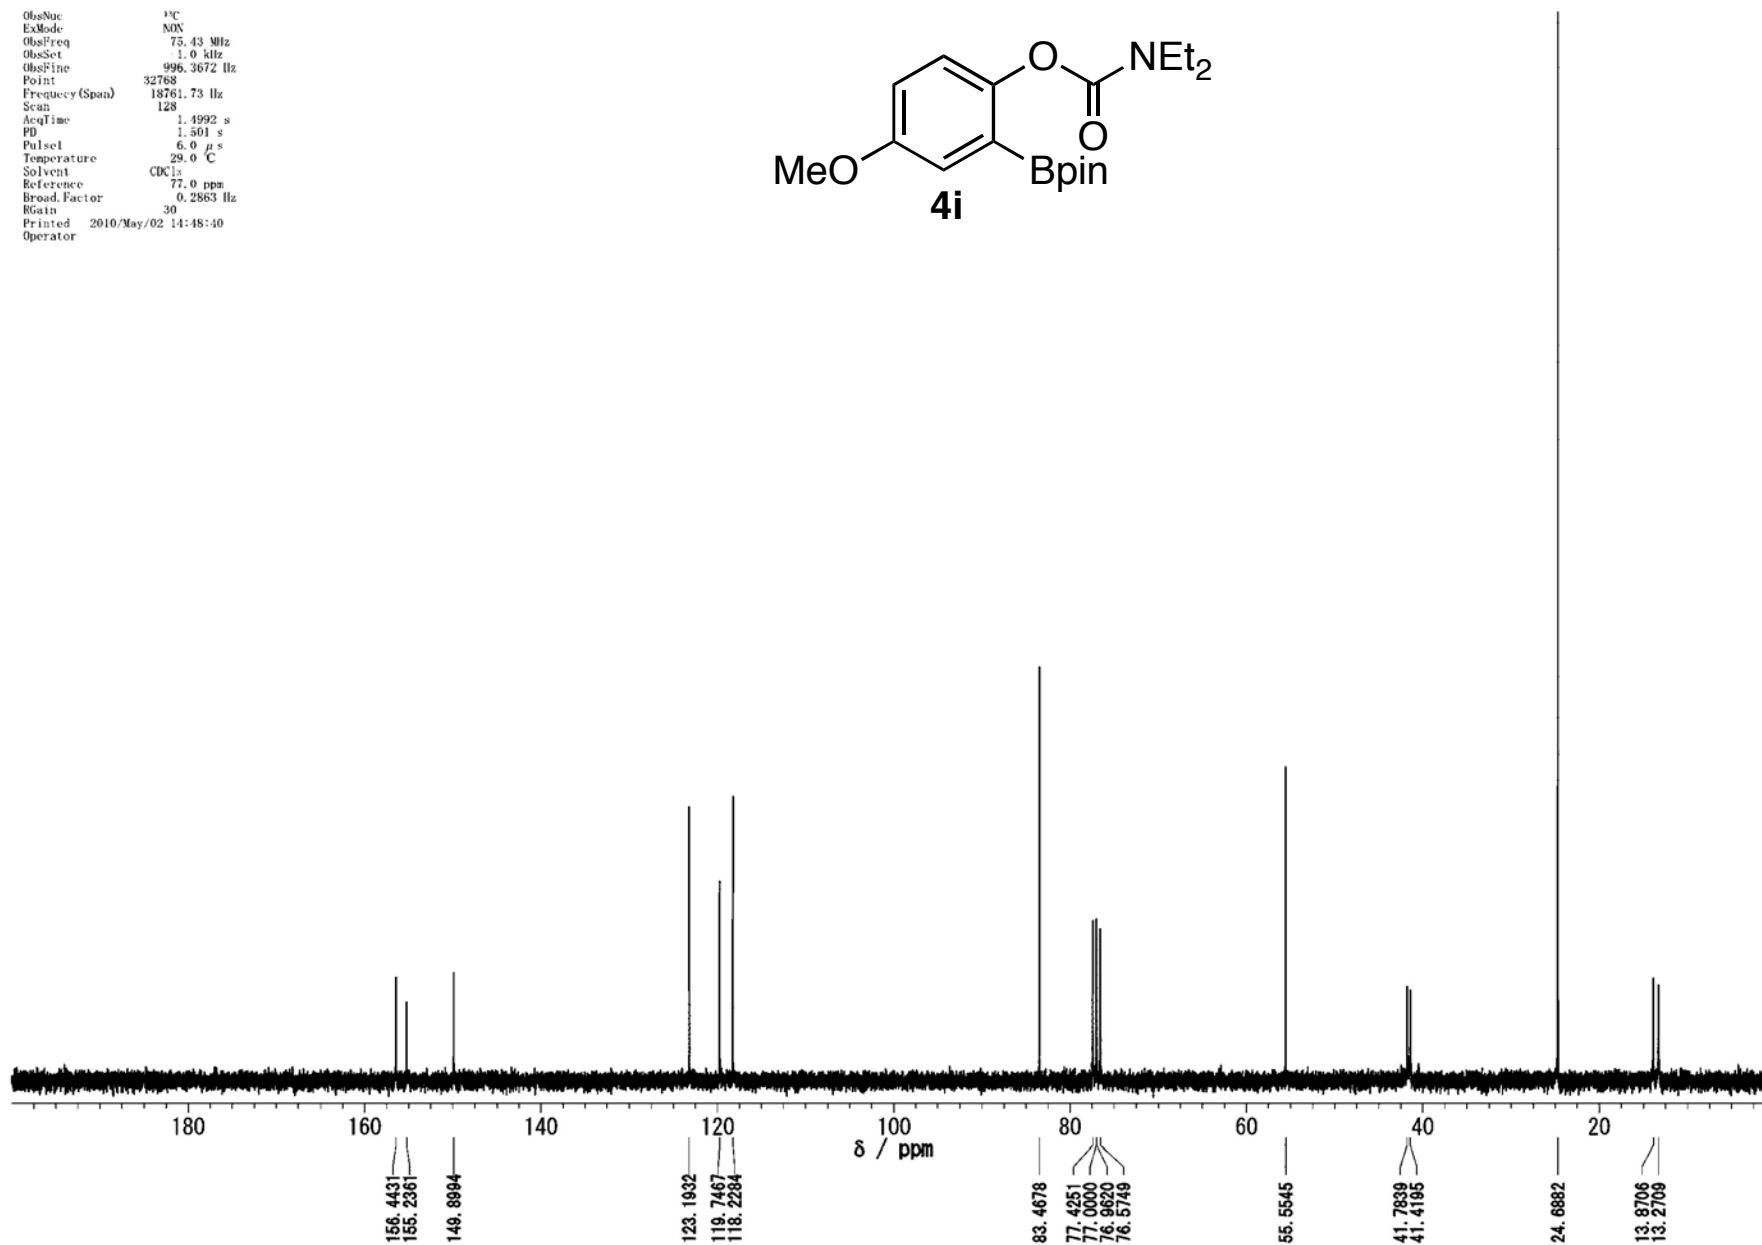

Original File: Oct 10 09  
 Date: Oct 10 09  
 Comment: STANDARD 1H OBSERVE

ObsNuc:  $^1\text{H}$   
 ExMode: NON  
 ObsFreq: 299.96 MHz  
 ObsSet: 1.0 kHz  
 ObsPine: 995.0047 Hz  
 Point: 16384  
 Frequency (Span): 4500.45 Hz  
 Scan: 16  
 AcqTime: 3.4983 s  
 PD: 1.502 s  
 Pulse1: 6.0  $\mu$ s  
 Temperature: 29.0  $^{\circ}\text{C}$   
 Solvent:  $\text{CDCl}_3$   
 Reference: 0.0 ppm  
 Broad. Factor: 0.1373 Hz  
 RGain: 25  
 Printed: 2010/May/02 14:52:06  
 Operator:

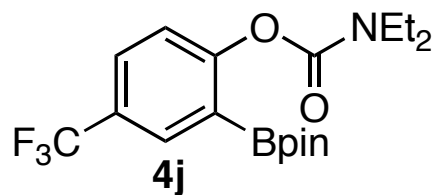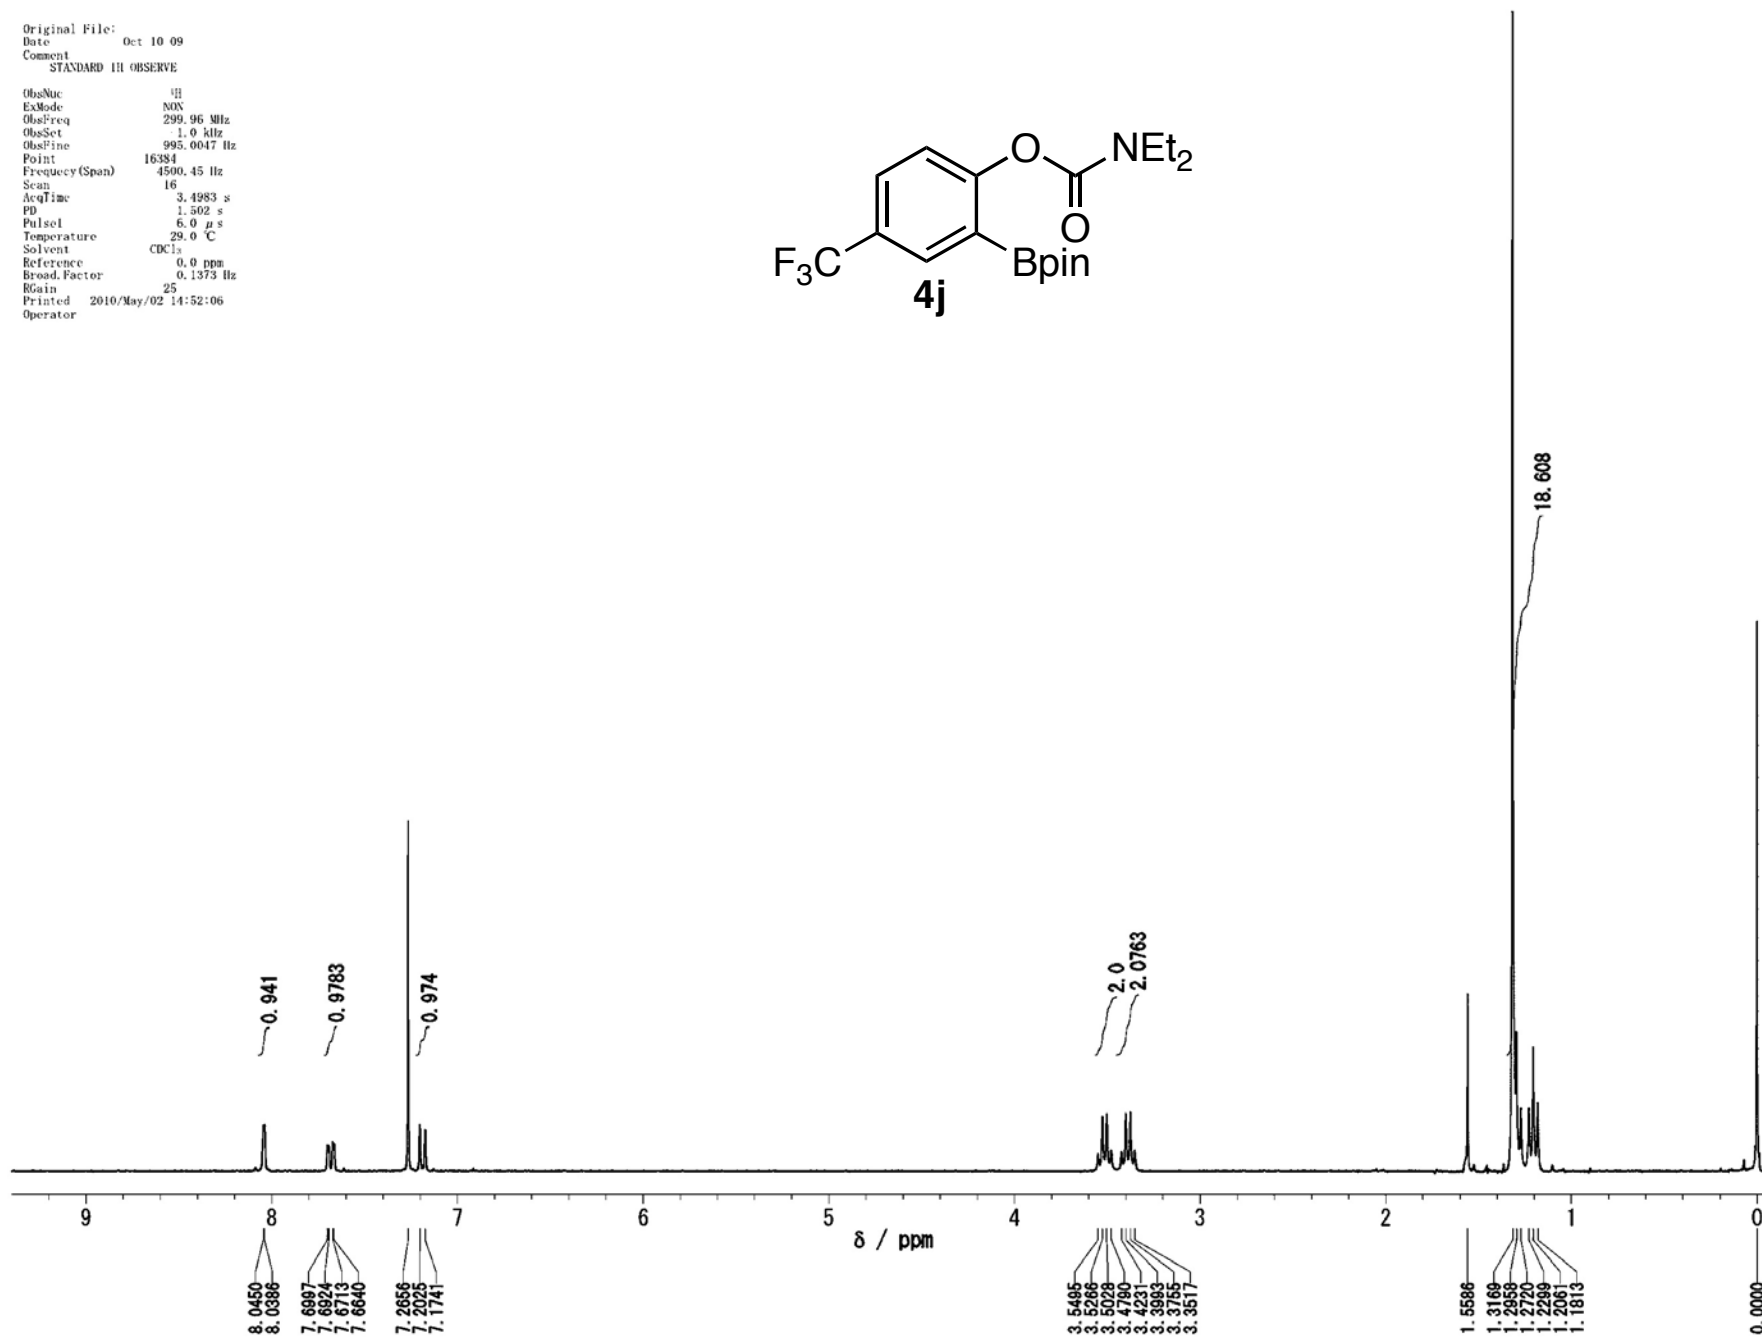

Original File: Mar 2 10  
 Date  
 Comment  
 C13 Statdard Observe  
 Stick\*none Tune=6.4 Match=0.4

ObsNuc  $^{13}\text{C}$   
 ExMode NOX  
 ObsFreq 75.43 MHz  
 ObsSet 1.0 kHz  
 ObsFine 996.3672 Hz  
 Point 32768  
 Frequency (Span) 18761.73 Hz  
 Scan 10240  
 AcqTime 1.4992 s  
 PD 1.501 s  
 Pulse 6.0  $\mu\text{s}$   
 Temperature 29.0  $^{\circ}\text{C}$   
 Solvent  $\text{CDCl}_3$   
 Reference 77.0 ppm  
 BroadFactor 0.2863 Hz  
 RGain 30  
 Printed 2010/May/02 14:55:42  
 Operator

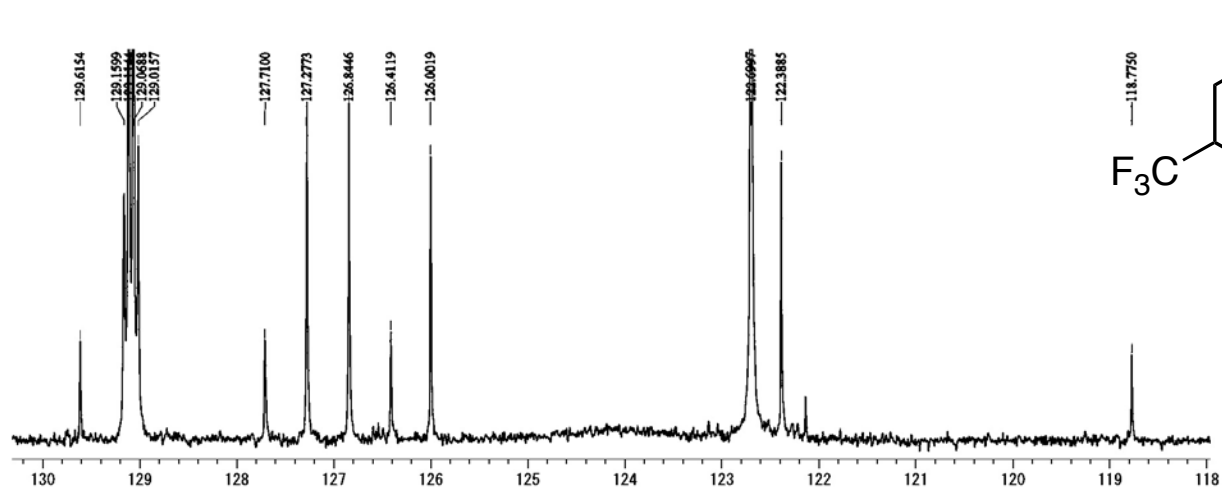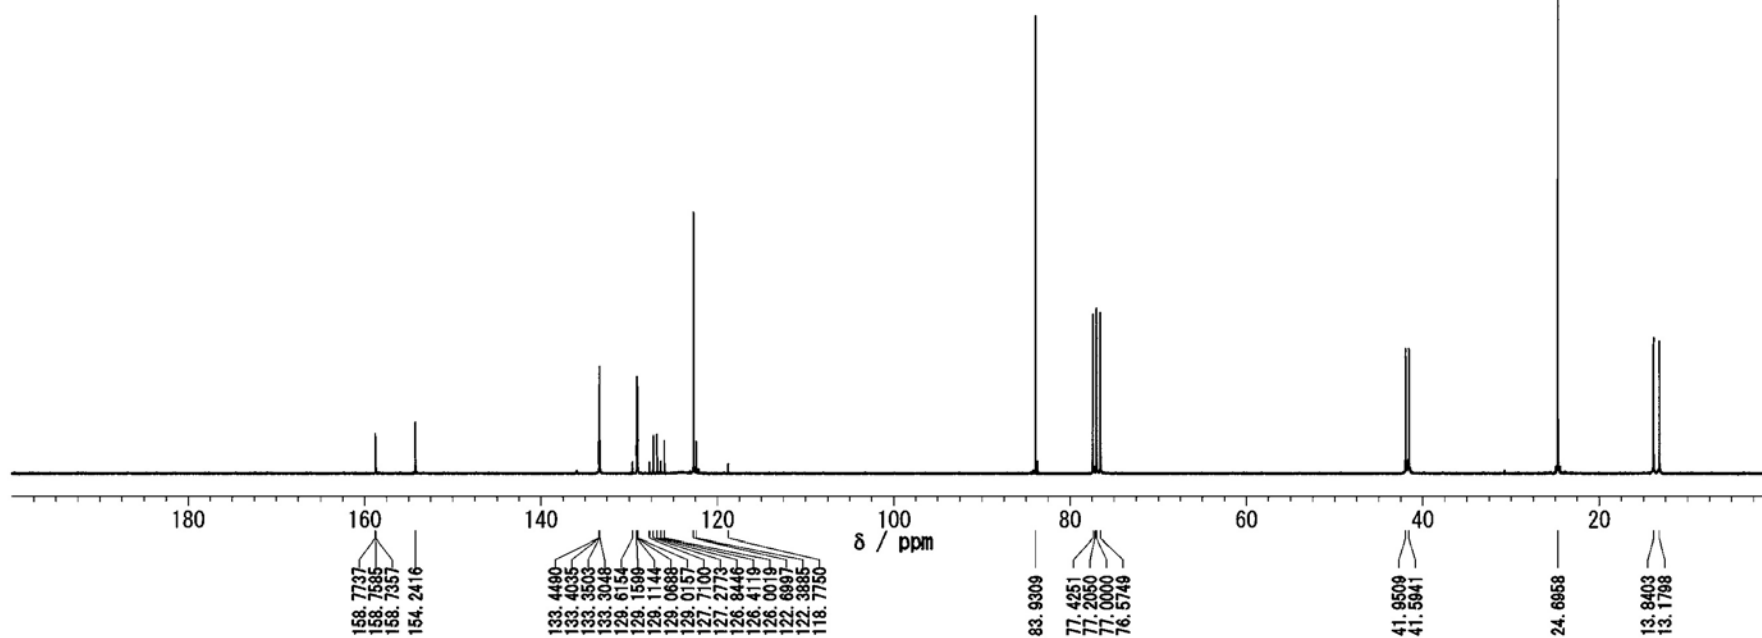

Original File:   
 Date: Sep 15 09   
 Comment: STANDARD 1H OBSERVE   
 ObsNuc:  $^1\text{H}$    
 ExMode: NON   
 ObsFreq: 299.96 MHz   
 ObsSet: 1.0 kHz   
 ObsPine: 995.0047 Hz   
 Point: 16384   
 Frequency (Span): 4500.45 Hz   
 Scan: 16   
 AcqTime: 3.4983 s   
 PD: 1.502 s   
 Pulse: 6.0  $\mu\text{s}$    
 Temperature: 29.0  $^{\circ}\text{C}$    
 Solvent:  $\text{CDCl}_3$    
 Reference: 0.0 ppm   
 Broad. Factor: 0.1373 Hz   
 RGain: 30   
 Printed: 2010/May/02 14:59:24   
 Operator:

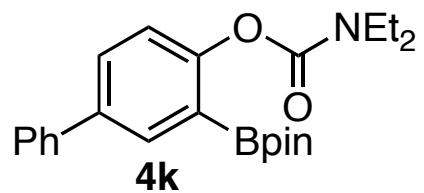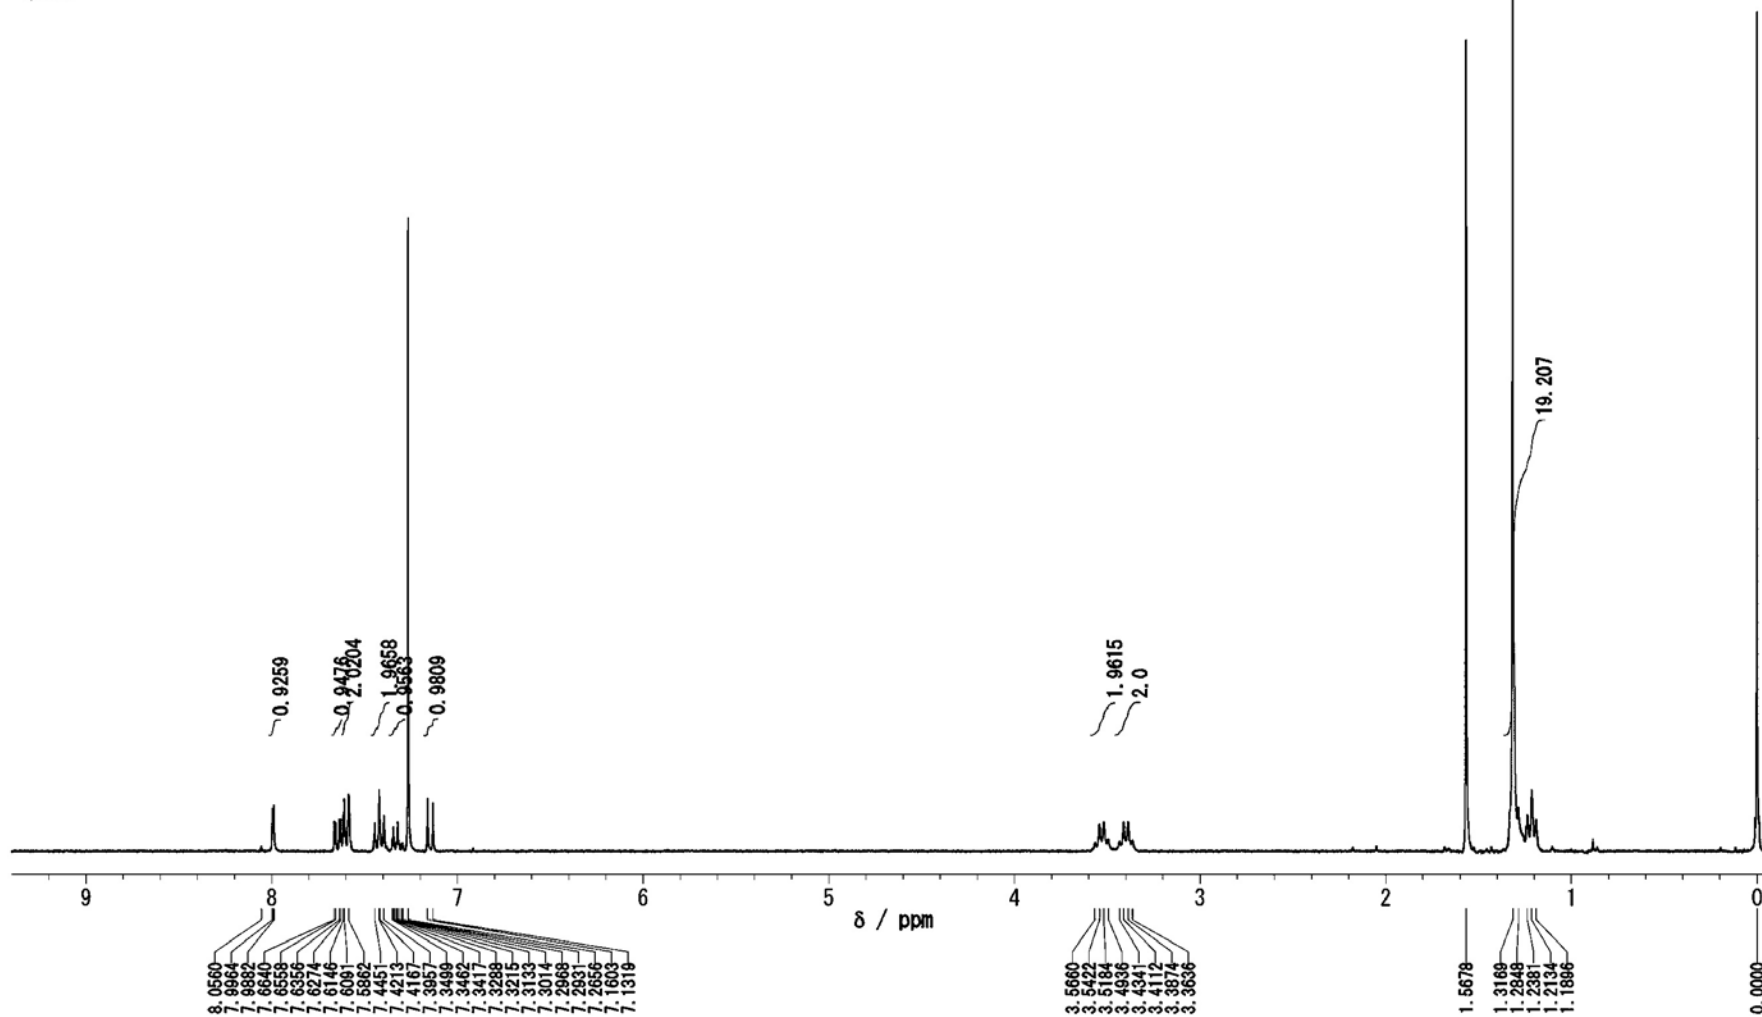

Original File:  
Date Feb 18 10  
Comment  
C13 Standard Observe  
Stick\*none Tune=6.4 Match=0.4

ObsNuc  $^{13}\text{C}$   
ExMode NOX  
ObsFreq 75.43 MHz  
ObsSet 1.0 kHz  
ObsFine 996.3672 Hz  
Point 32768  
Frequency (Span) 18761.73 Hz  
Scan 256  
AcqTime 1.4992 s  
PD 1.501 s  
Pulse1 6.0  $\mu\text{s}$   
Temperature 29.0  $^{\circ}\text{C}$   
Solvent  $\text{CDCl}_3$   
Reference 77.0 ppm  
BroadFactor 0.2863 Hz  
RGain 30  
Printed 2010/May/02 15:03:40  
Operator

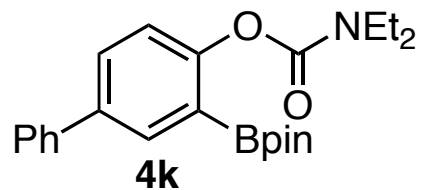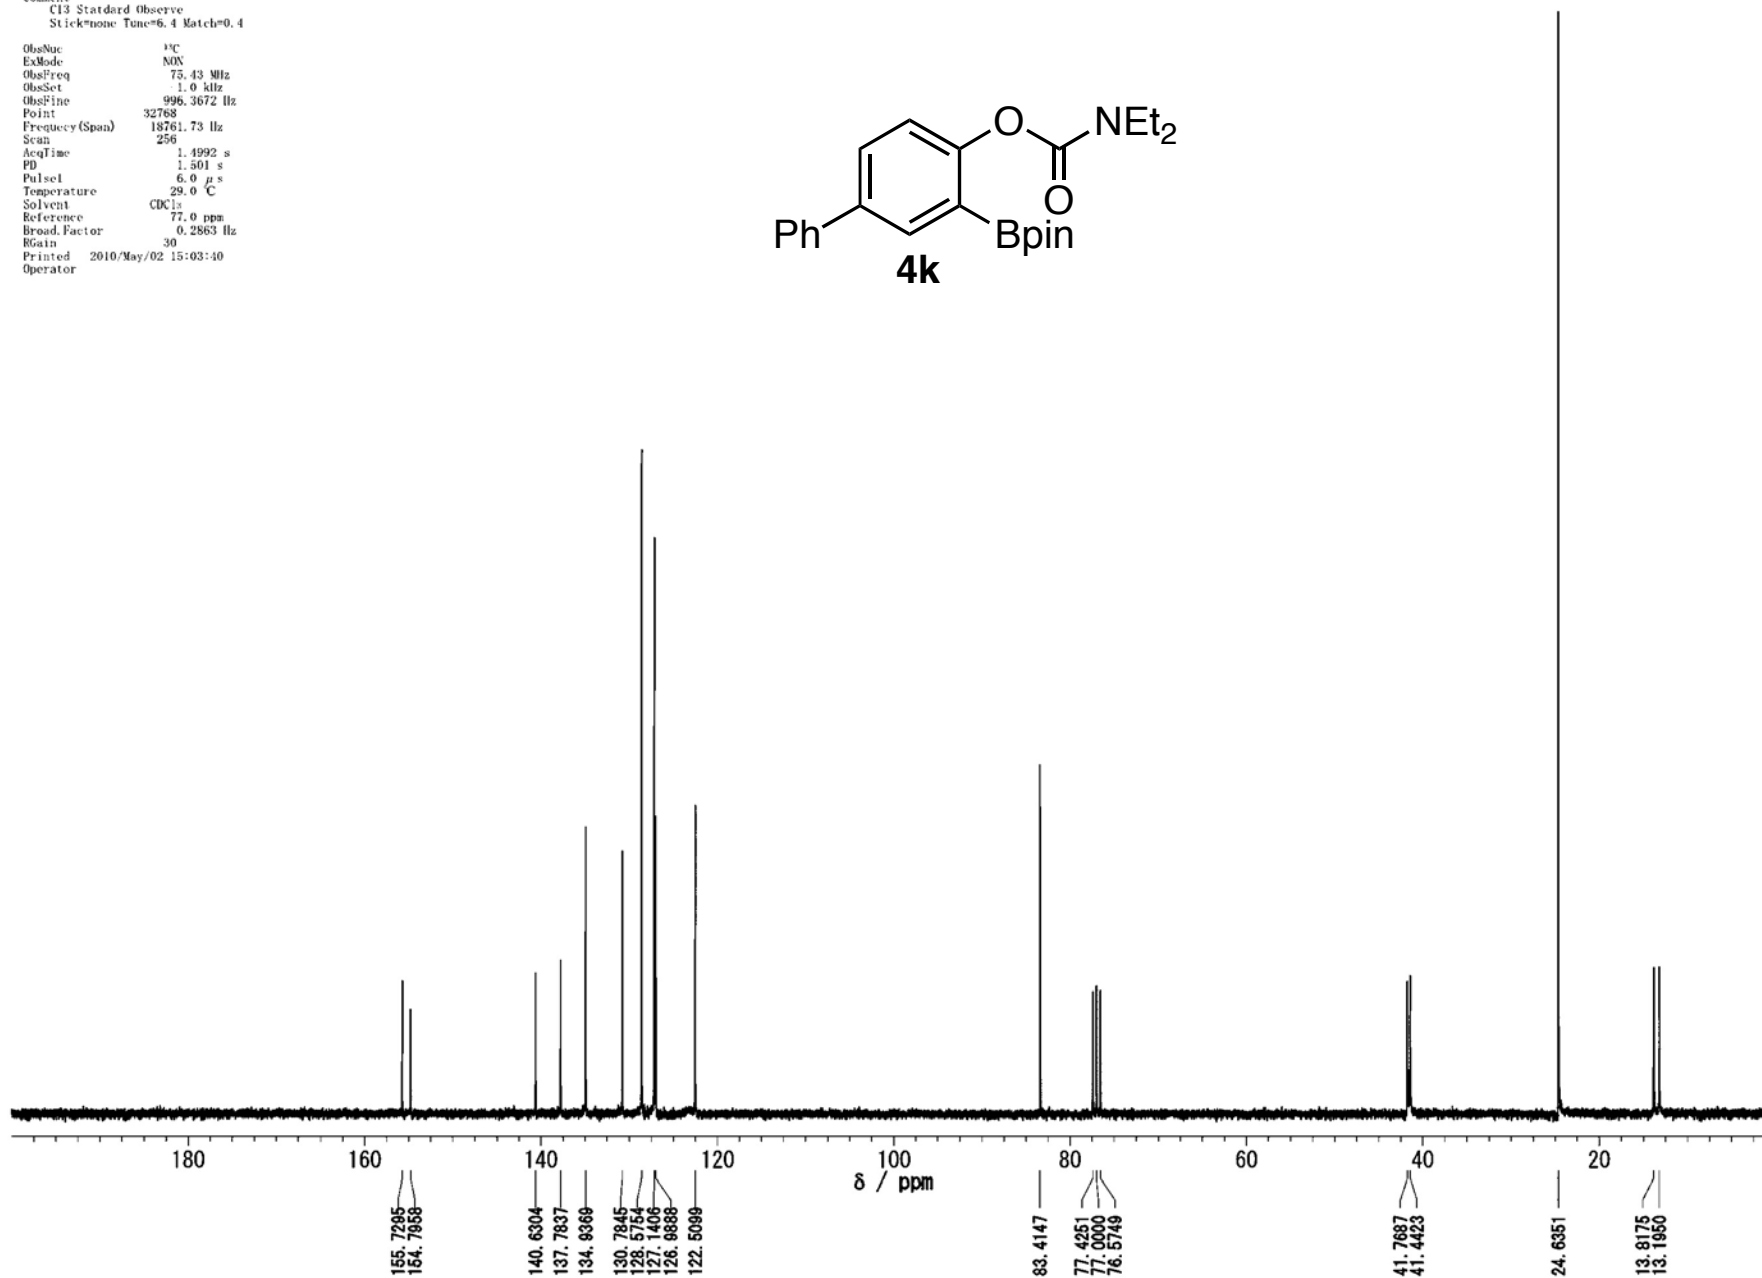

Original File:   
 Date: Apr 13 10   
 Comment: STANDARD 1H OBSERVE   
 ObsNuc: <sup>1</sup>H   
 ExMode: NON   
 ObsFreq: 299.96 MHz   
 ObsSet: 1.0 kHz   
 ObsPine: 995.0047 Hz   
 Point: 16384   
 Frequency (Span): 4500.45 Hz   
 Scan: 16   
 AcqTime: 3.4983 s   
 PD: 1.502 s   
 Pulse1: 6.0 μs   
 Temperature: 29.0 °C   
 Solvent: CDCl<sub>3</sub>   
 Reference: 0.0 ppm   
 Broad. Factor: 0.1373 Hz   
 RGain: 30   
 Printed: 2010/May/02 15:08:50   
 Operator:

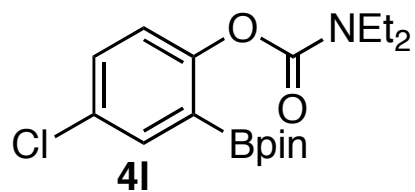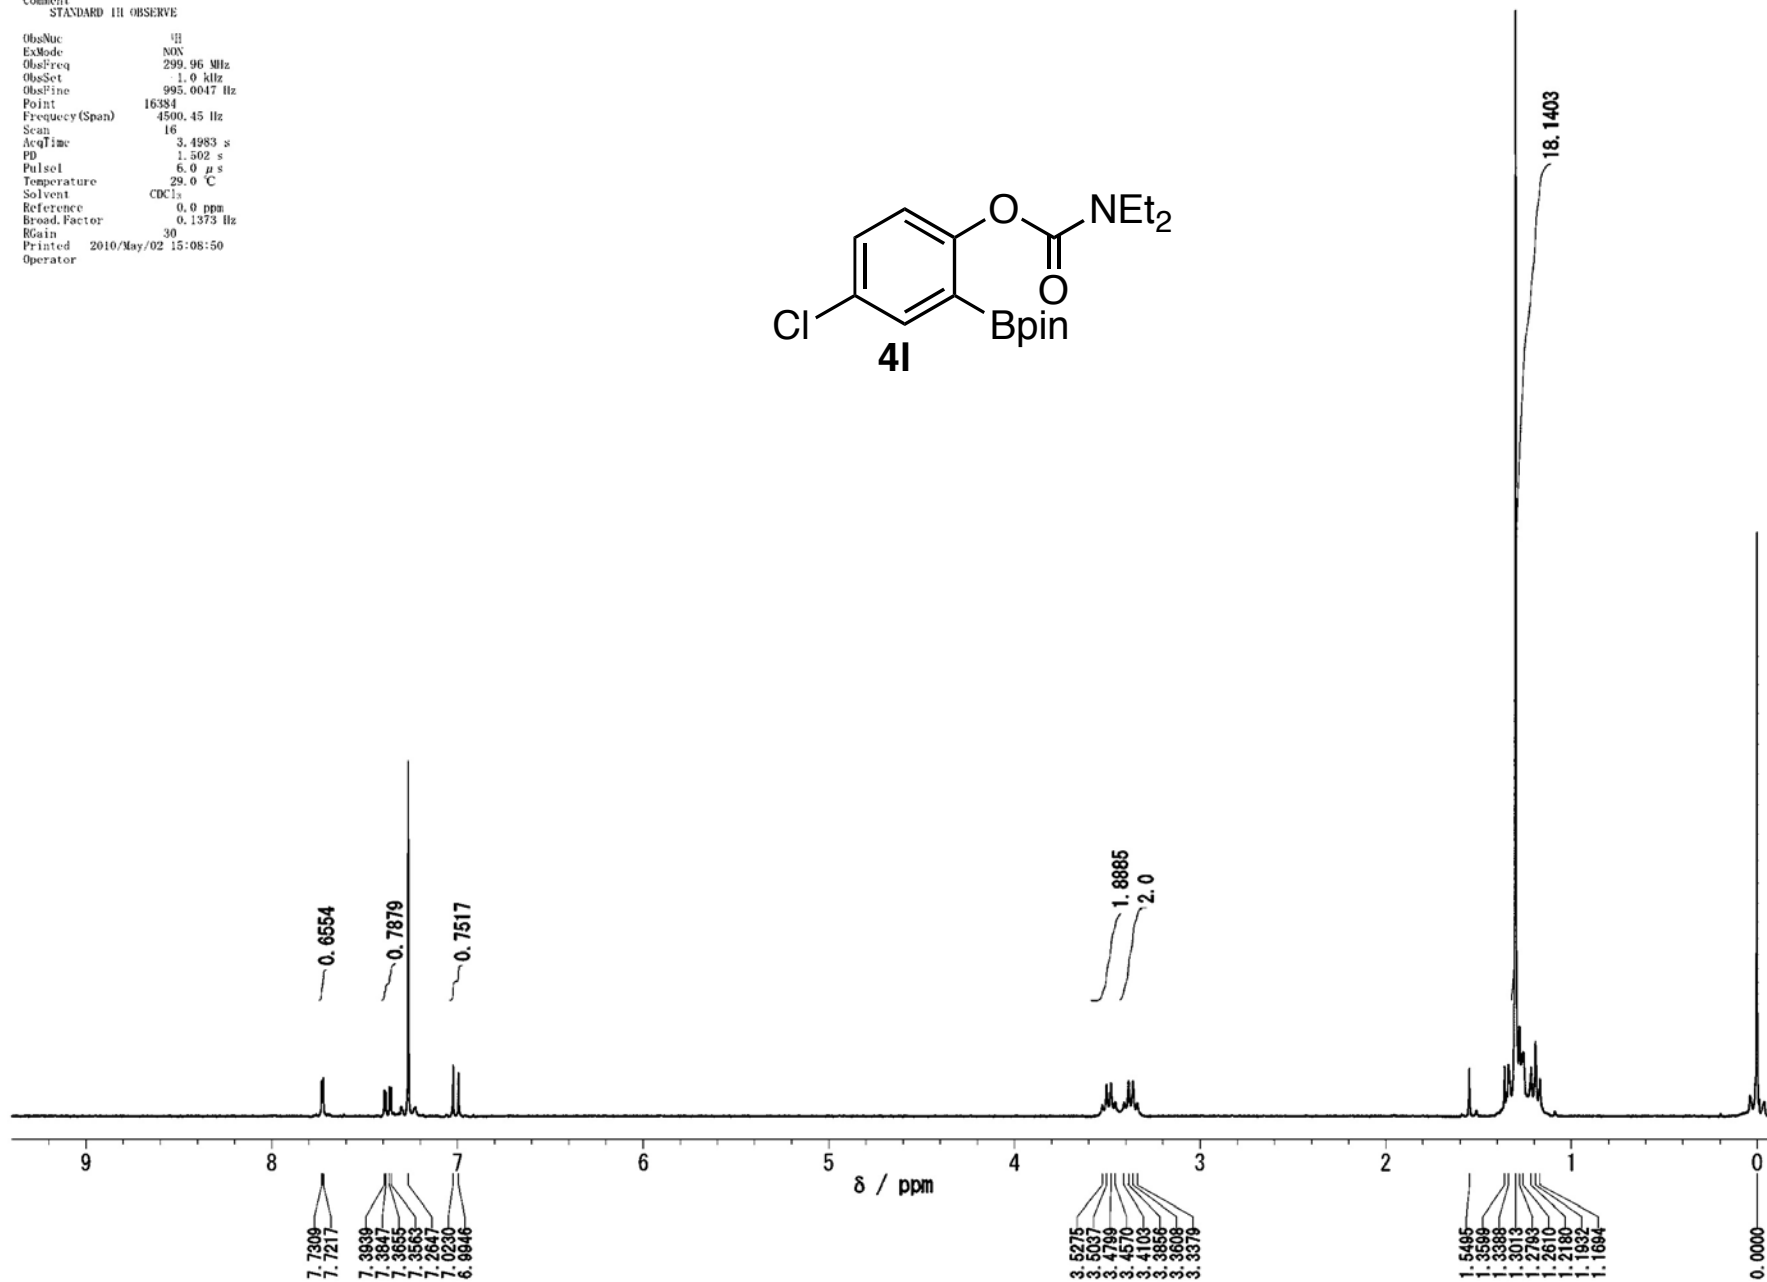

Original File:  
Date Apr 27 10  
Comment  
C13 Standard Observe  
Stick\*none Tune=6.4 Match=0.4

ObsNuc  $^{13}\text{C}$   
ExMode NOX  
ObsFreq 75.43 MHz  
ObsSet 1.0 kHz  
ObsFine 996.3672 Hz  
Point 32768  
Frequency (Span) 18761.73 Hz  
Scan 10400  
AcqTime 1.4992 s  
PD 1.501 s  
Pulse1 6.0  $\mu\text{s}$   
Temperature 29.0  $^{\circ}\text{C}$   
Solvent  $\text{CDCl}_3$   
Reference 77.0 ppm  
BroadFactor 0.2863 Hz  
RGain 30  
Printed 2010/May/02 15:11:31  
Operator

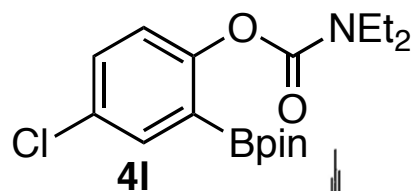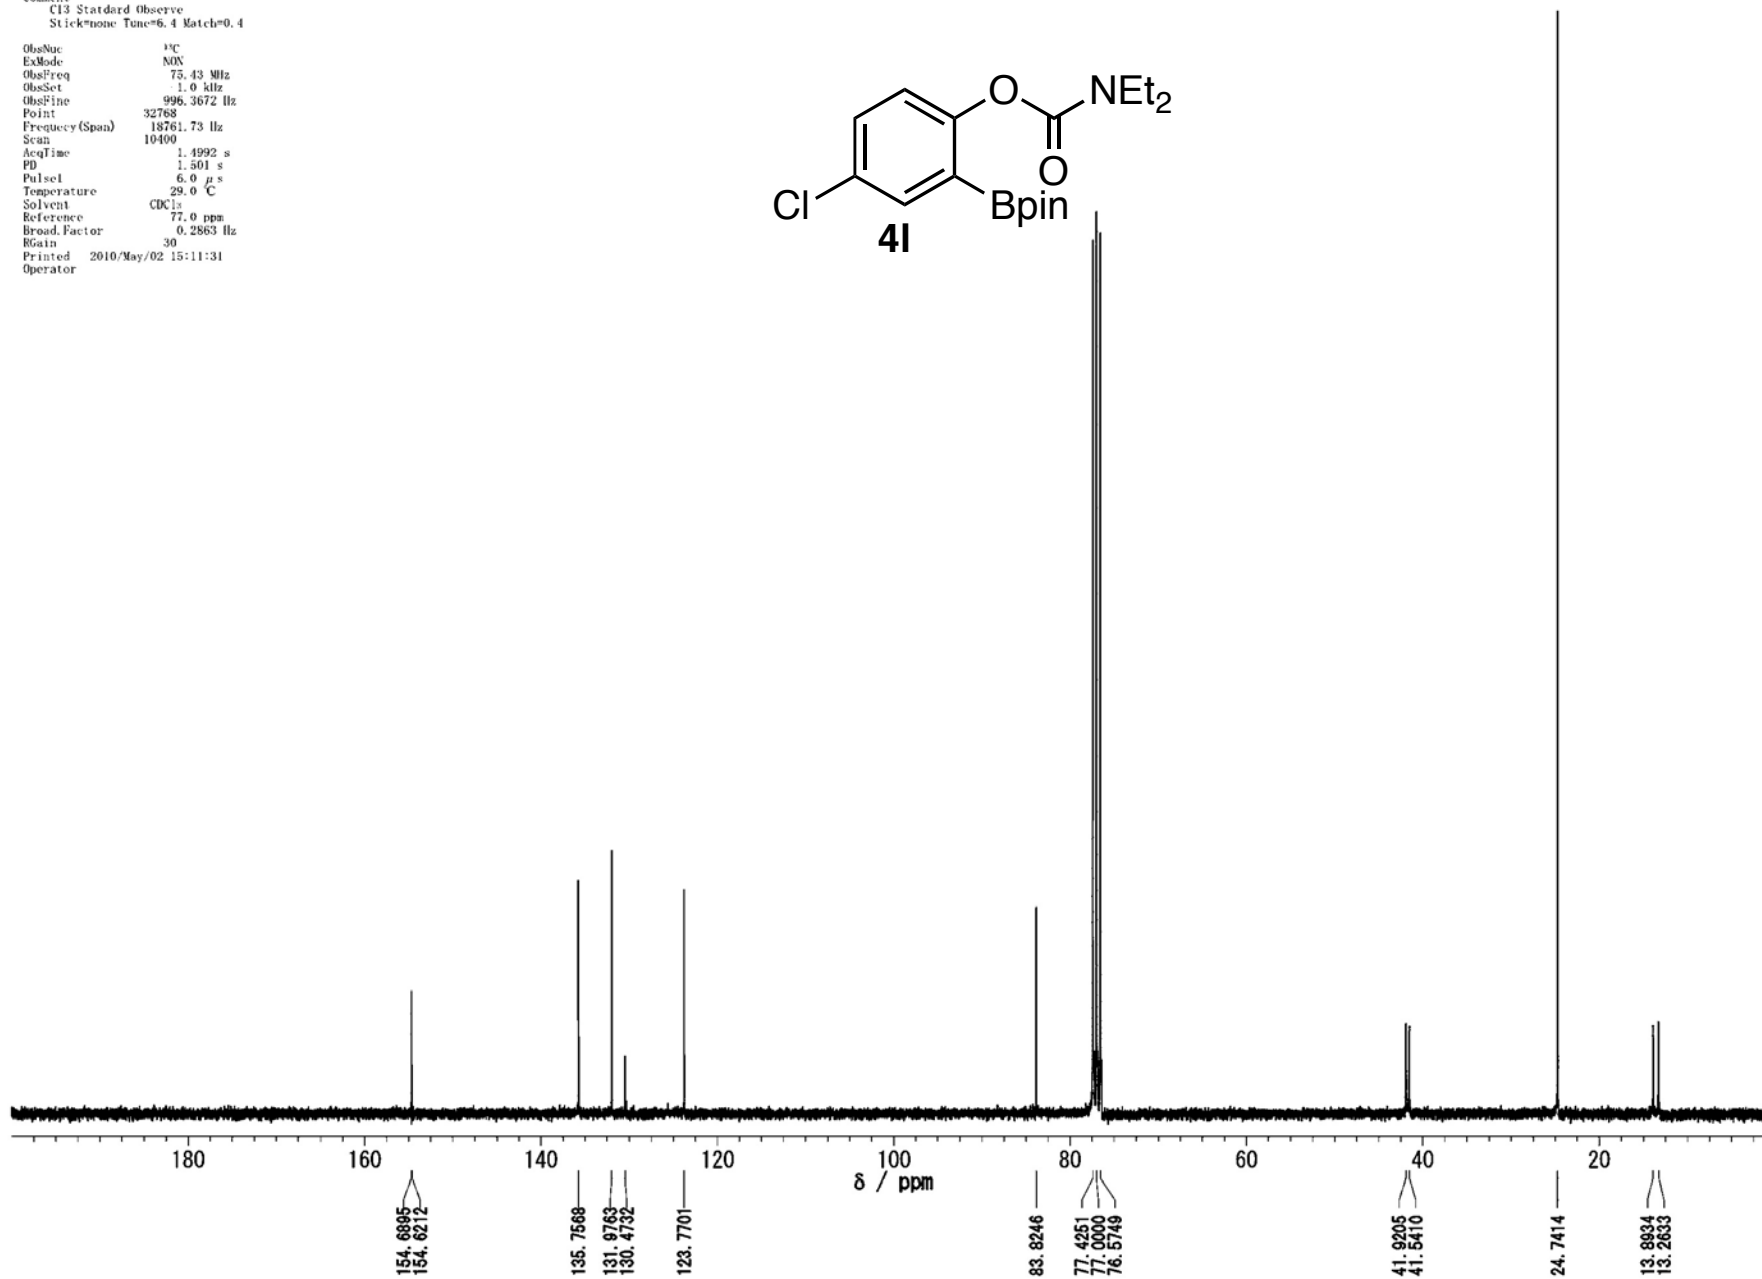

date            Dec 1 09  
 Comment       STANDARD 1H OBSERVE  
 ObsNuc        <sup>1</sup>H  
 ExMode        NOX  
 ObsFreq       299.96 MHz  
 ObsSet        1.0 kHz  
 ObsPine       995.0047 Hz  
 Point         16384  
 Frequency (Span) 4500.45 Hz  
 Scan          16  
 AcqTime       3.4983 s  
 PD            1.502 s  
 Pulse1        6.0 μs  
 Temperature   29.0 °C  
 Solvent       CDCl<sub>3</sub>  
 Reference     0.0 ppm  
 BroadFactor   0.1373 Hz  
 RGain         12  
 Printed       2010/May/02 15:16:10  
 Operator

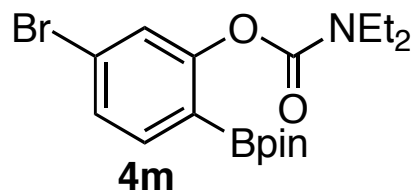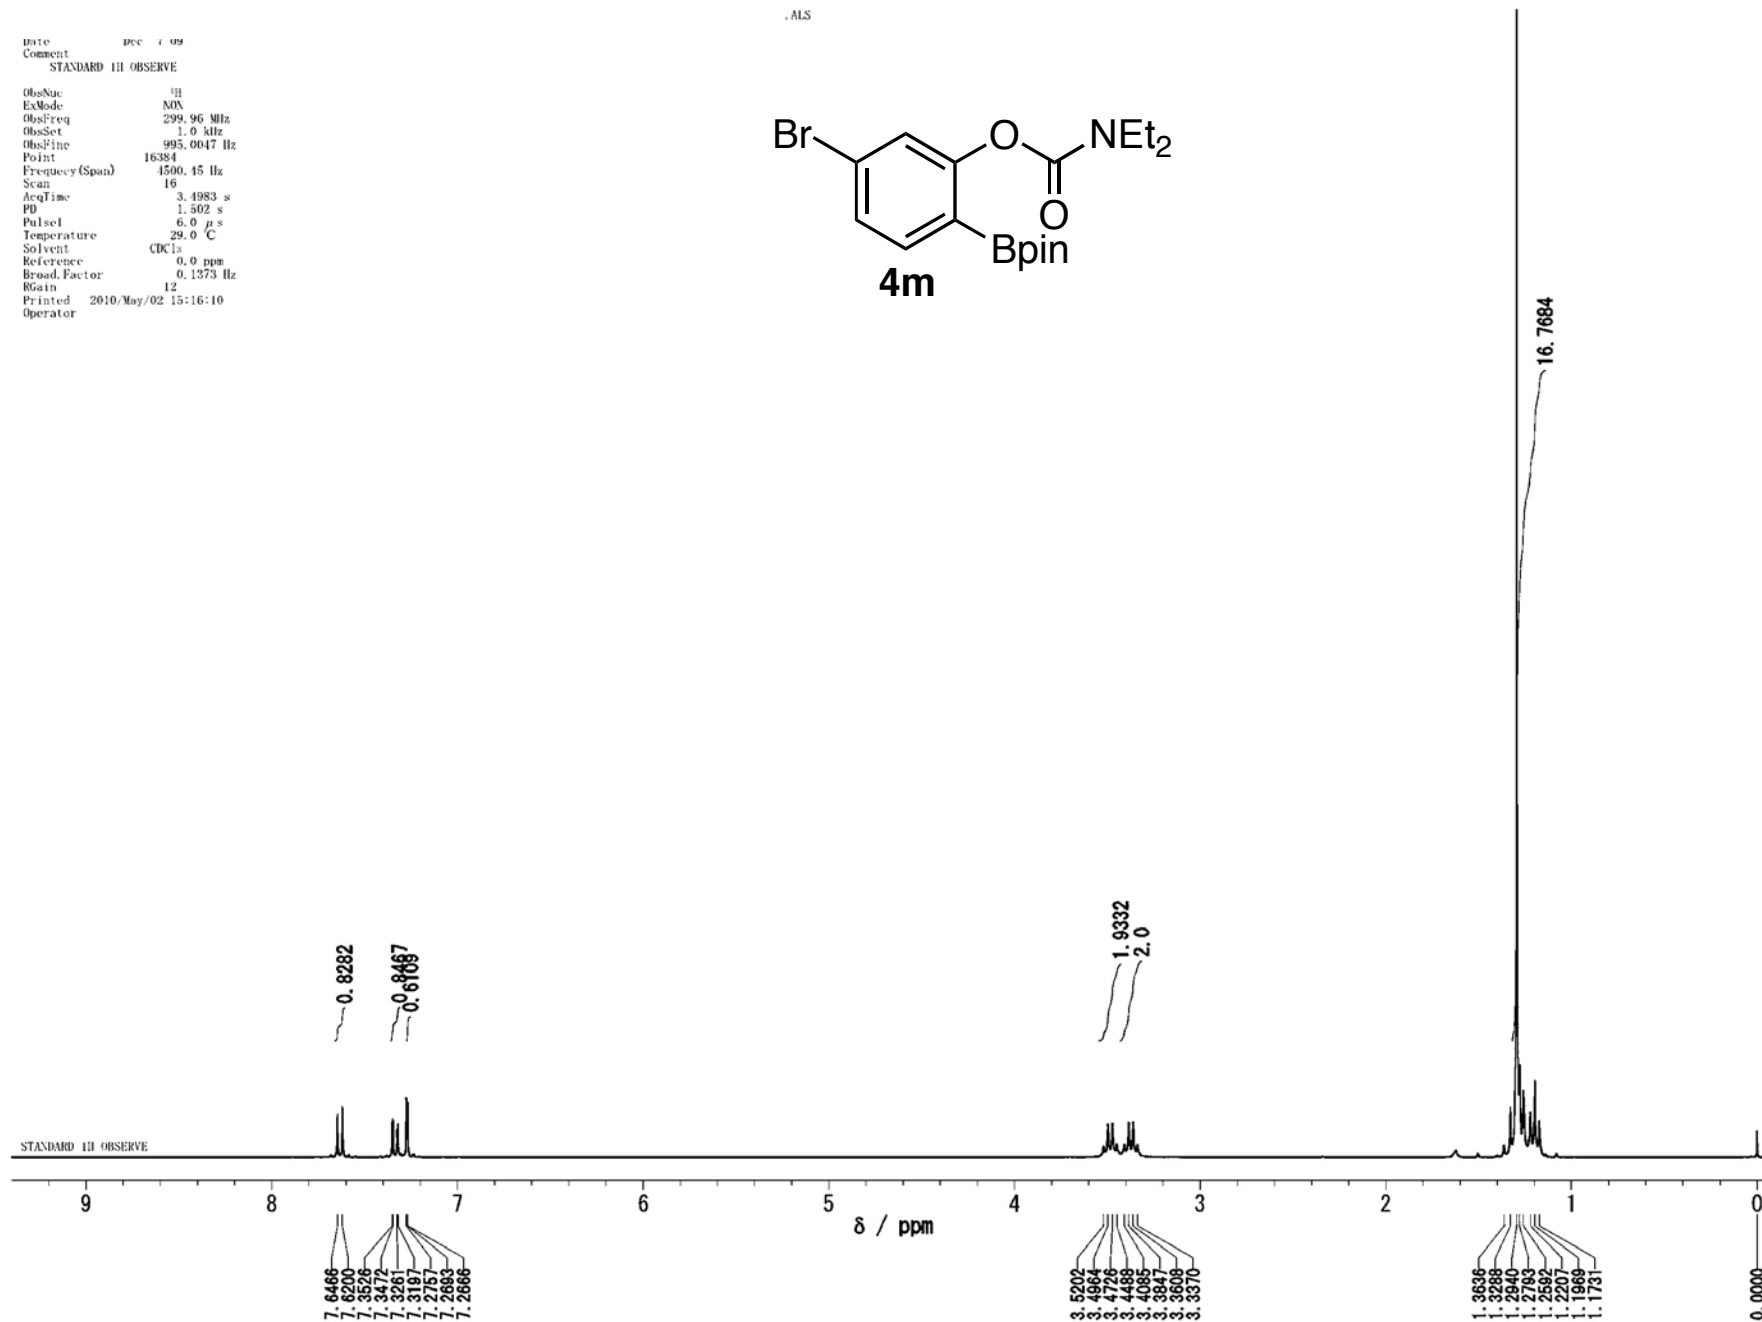



Original File:  
Date Feb 22 10  
Comment  
C13 Standard Observe  
Stick\*none Tune\*6.4 Match\*0.4

ObsNuc  $^{13}\text{C}$   
ExMode NOX  
ObsFreq 75.43 MHz  
ObsSet 1.0 kHz  
ObsFine 996.3672 Hz  
Point 32768  
Frequency (Span) 18761.73 Hz  
Scan 256  
AcqTime 1.4992 s  
PD 1.501 s  
Pulse1 6.0  $\mu\text{s}$   
Temperature 29.0  $^{\circ}\text{C}$   
Solvent  $\text{CDCl}_3$   
Reference 77.0 ppm  
Broad.Factor 0.2863 Hz  
RGain 30  
Printed 2010/May/02 15:18:26  
Operator

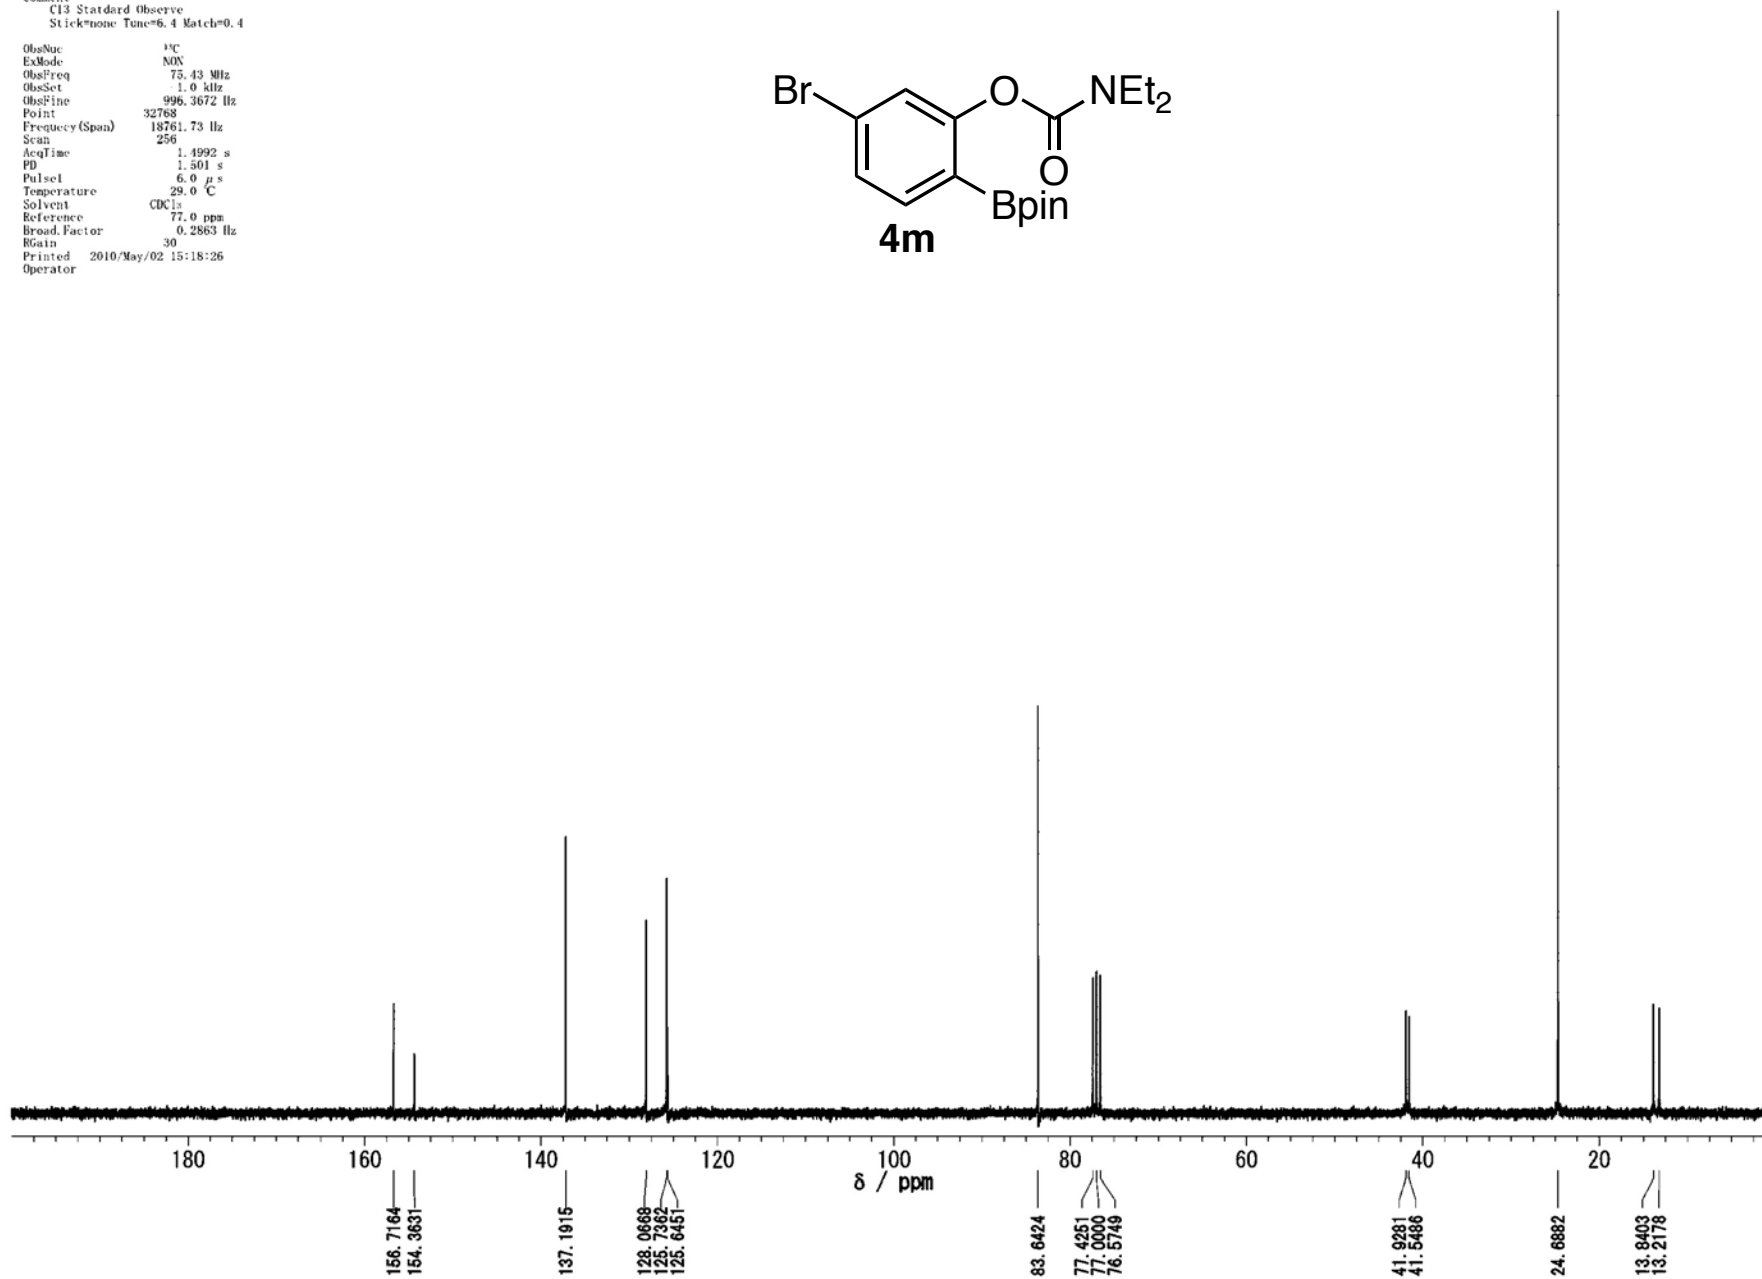

Original File:   
 Date: Jun 23 10  
 Comment: STANDARD 1H OBSERVE

ObsNuc: <sup>1</sup>H  
 ExMode: NOX  
 ObsFreq: 299.96 MHz  
 ObsSet: 1.0 kHz  
 ObsPine: 995.0047 Hz  
 Point: 16384  
 Frequency (Span): 4500.45 Hz  
 Scan: 16  
 AcqTime: 3.4983 s  
 PD: 1.502 s  
 Pulse: 6.0  $\mu$ s  
 Temperature: 29.0  $^{\circ}$ C  
 Solvent: CDCl<sub>3</sub>  
 Reference: 0.0 ppm  
 Broad. Factor: 0.1373 Hz  
 RGain: 2  
 Printed: 2010/Jun/24 11:58:30  
 Operator:

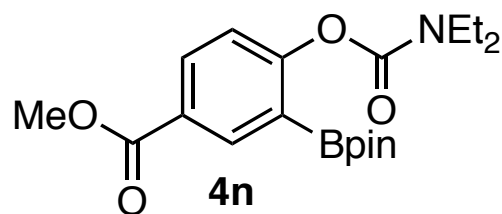

+

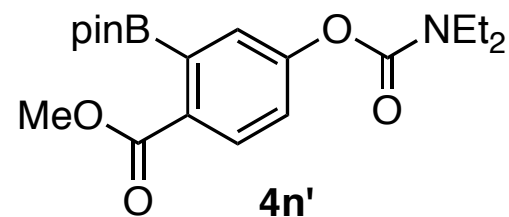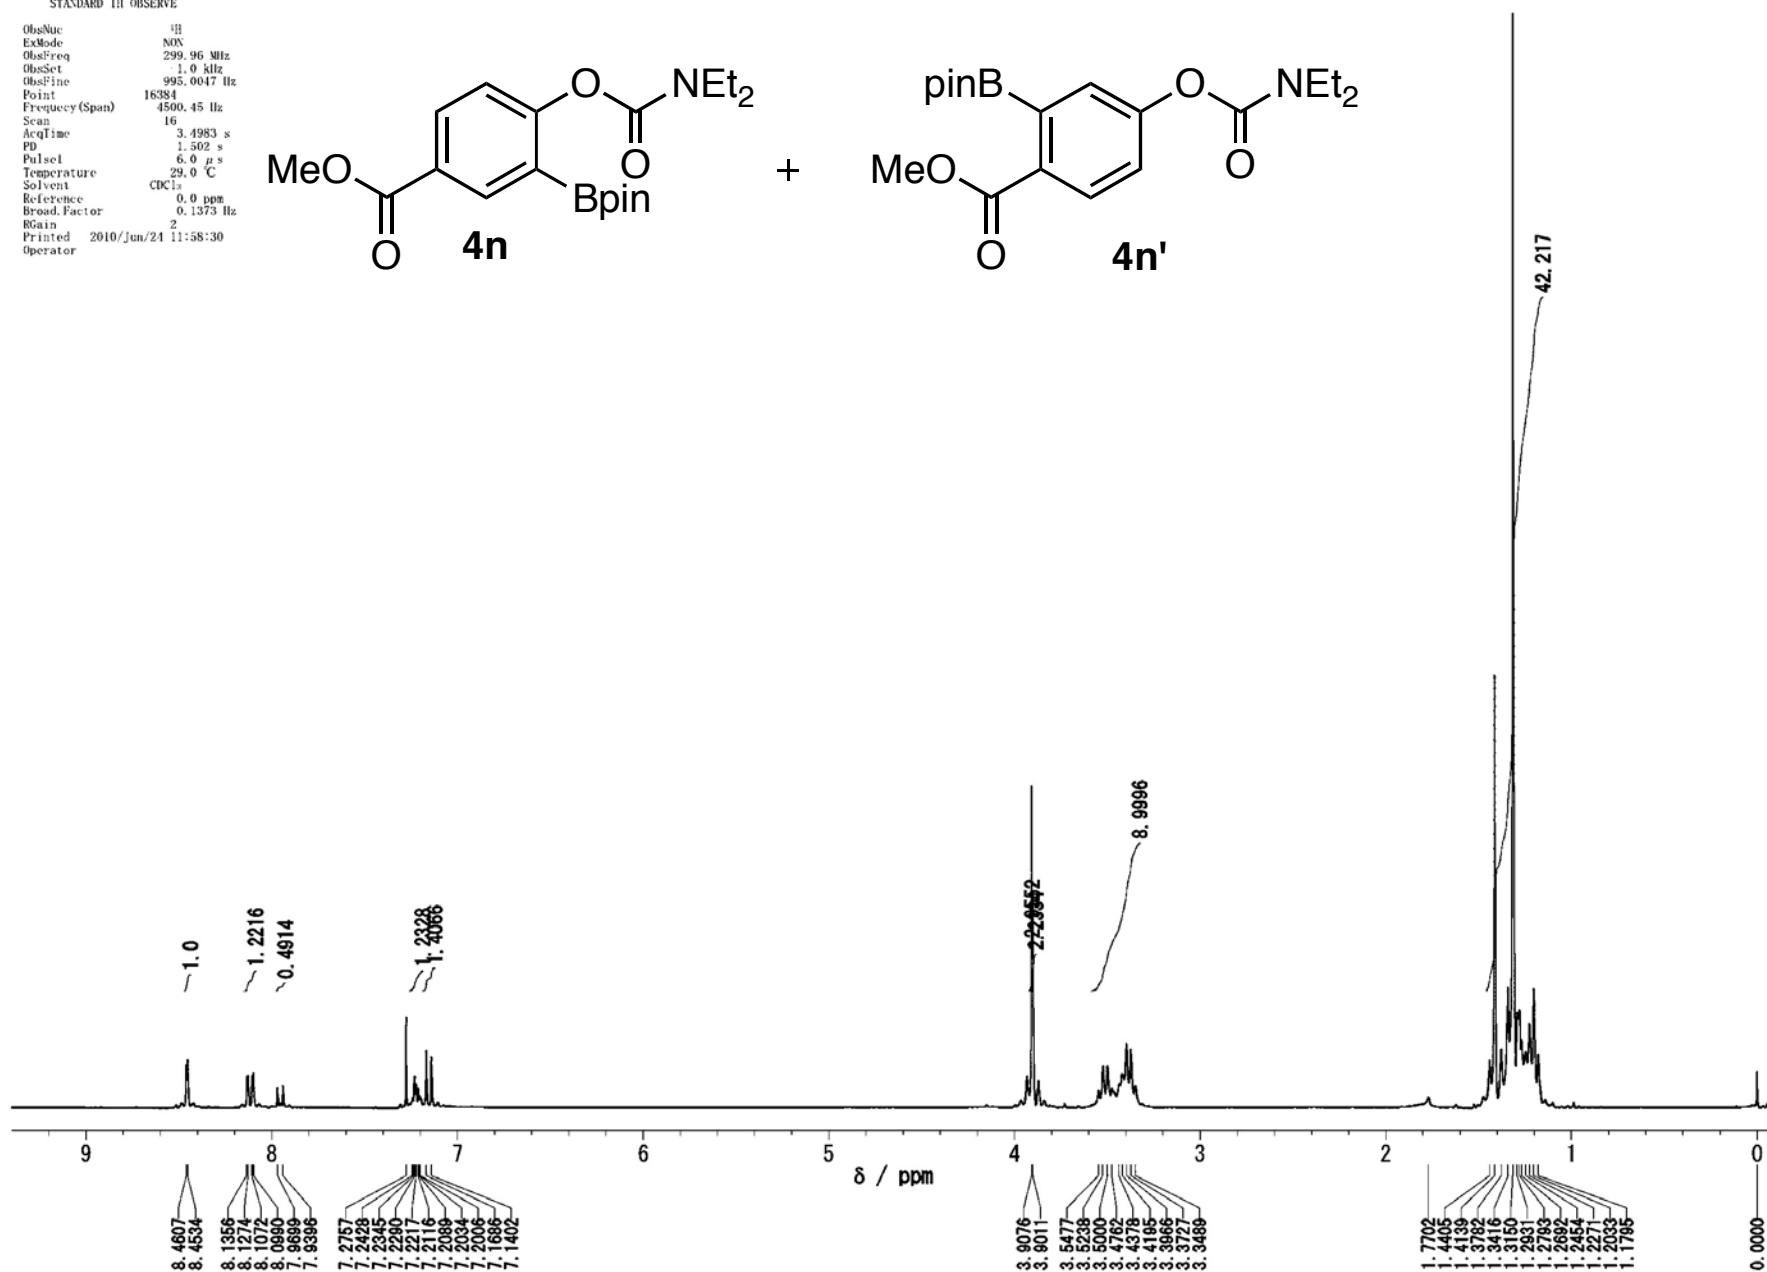

Original File:   
 Date: Jun 23 10  
 Comment: C13 Standard Observe  
 Stick\*none Tune\*6.4 Match\*0.4

ObsNuc: <sup>13</sup>C  
 ExMode: NOX  
 ObsFreq: 75.43 MHz  
 ObsSet: -1.0 kHz  
 ObsFine: 996.3672 Hz  
 Point: 32768  
 Frequency (Span): 18761.73 Hz  
 Scan: 128  
 AcqTime: 1.4992 s  
 PD: 1.501 s  
 Pulse1: 6.0 μs  
 Temperature: 29.0 °C  
 Solvent: CDCl<sub>3</sub>  
 Reference: 77.0 ppm  
 BroadFactor: 0.2863 Hz  
 RGain: 30  
 Printed: 2010/Jun/24 11:53:38  
 Operator:

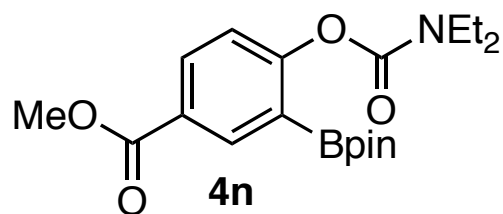

+

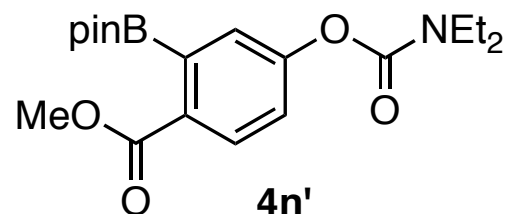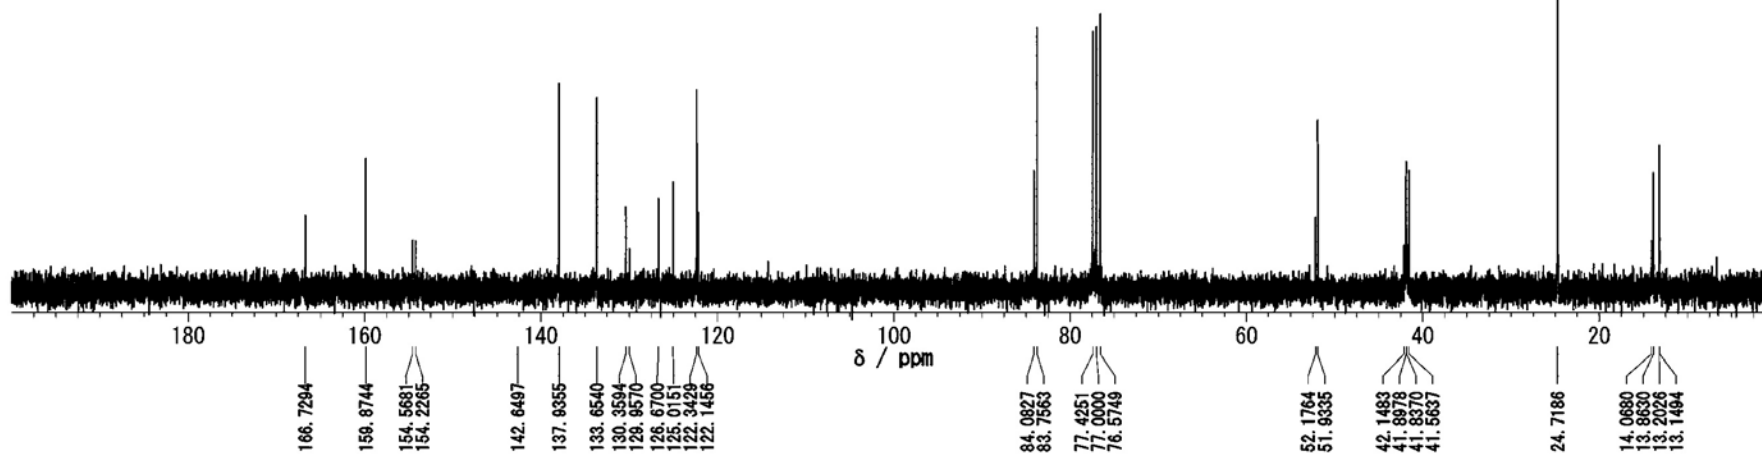

Original File:   
 Date: Feb 25 10   
 Comment: STANDARD 1H OBSERVE   
 ObsNuc:  $^1\text{H}$    
 ExMode: NON   
 ObsFreq: 299.96 MHz   
 ObsSet: 1.0 kHz   
 ObsPine: 995.0047 Hz   
 Point: 16384   
 Frequency (Span): 4500.45 Hz   
 Scan: 16   
 AcqTime: 3.4983 s   
 PD: 1.502 s   
 Pulse1: 6.0  $\mu\text{s}$    
 Temperature: 29.0  $^{\circ}\text{C}$    
 Solvent:  $\text{CDCl}_3$    
 Reference: 0.0 ppm   
 Broad. Factor: 0.1373 Hz   
 RGain: 6   
 Printed: 2010/May/02 15:25:41   
 Operator:

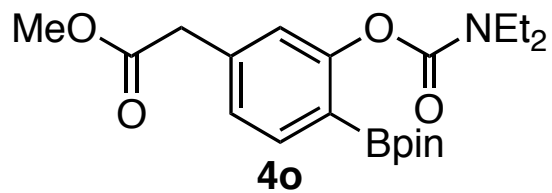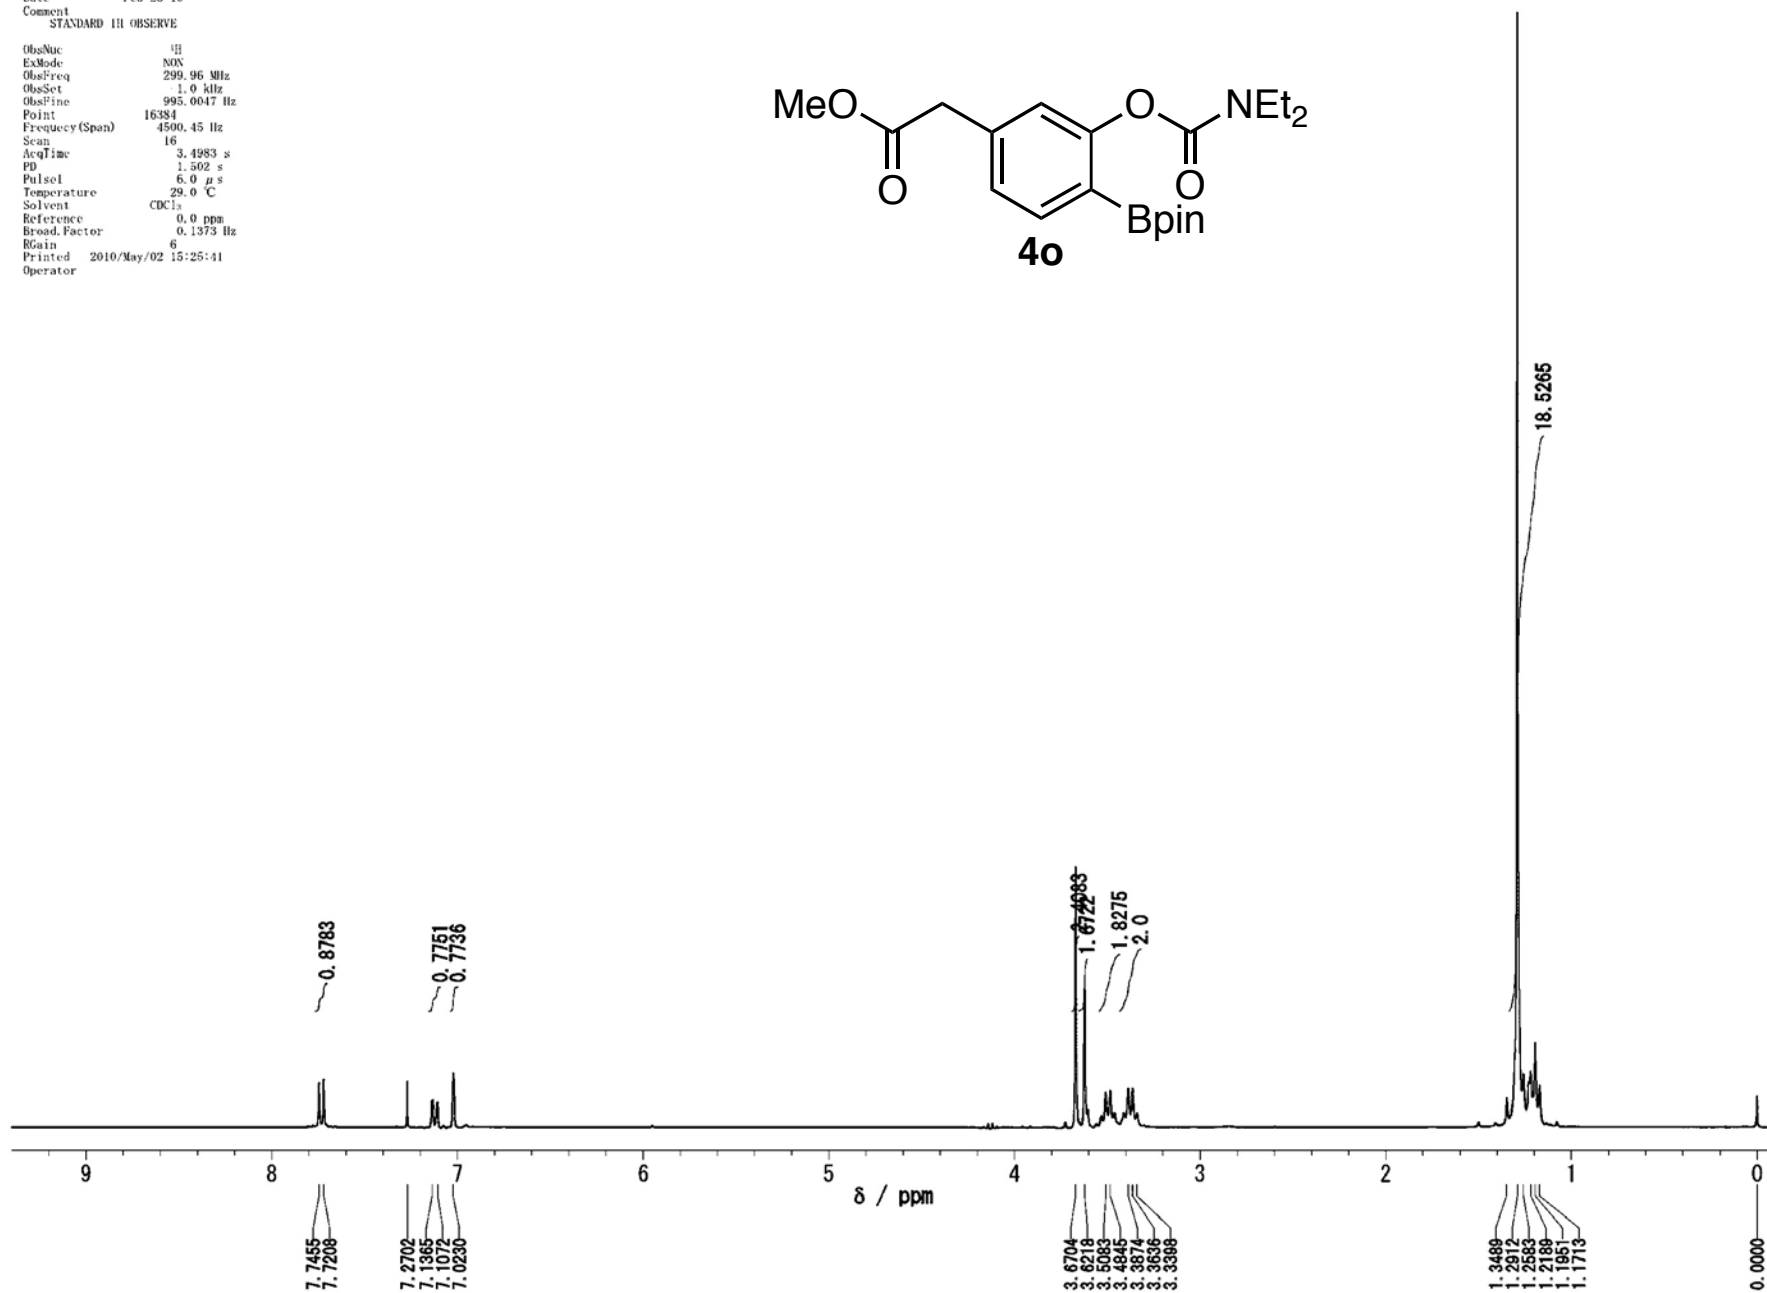

Original File:  
Date Feb 25 10  
Comment  
C13 Standard Observe  
Stick\*none Tune=6.4 Match=0.4

ObsNuc  $^{13}\text{C}$   
ExMode NOX  
ObsFreq 75.43 MHz  
ObsSet 1.0 kHz  
ObsFine 996.3672 Hz  
Point 32768  
Frequency (Span) 18761.73 Hz  
Scan 128  
AcqTime 1.4992 s  
PD 1.501 s  
Pulse1 6.0  $\mu\text{s}$   
Temperature 29.0  $^{\circ}\text{C}$   
Solvent  $\text{CDCl}_3$   
Reference 77.0 ppm  
Broad.Factor 0.2863 Hz  
RGain 30  
Printed 2010/May/02 15:27:38  
Operator

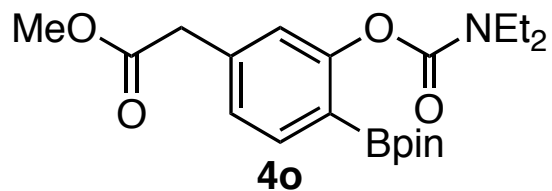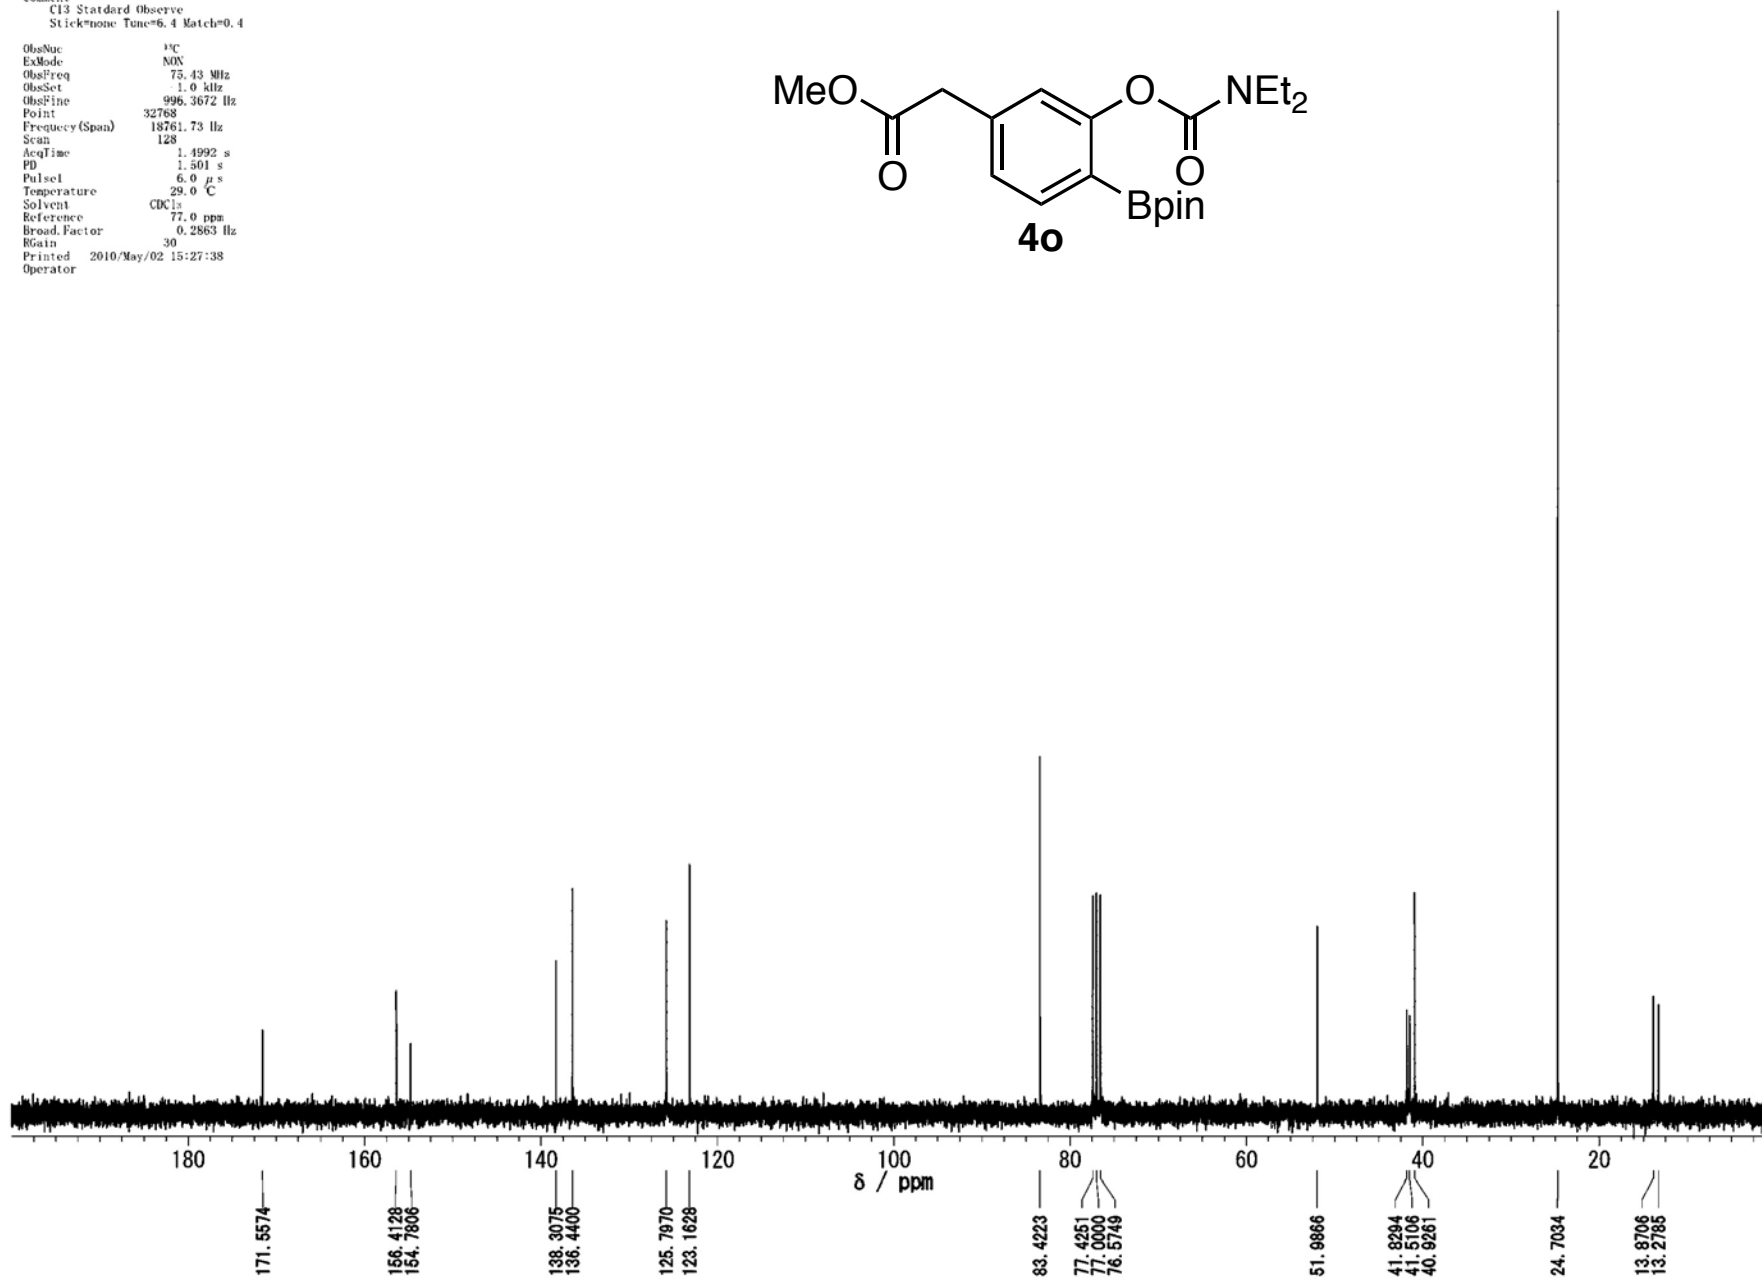

Original File:   
 Date: Apr 24 10   
 Comment: STANDARD 1H OBSERVE   
 ObsNuc: <sup>1</sup>H   
 ExMode: NON   
 ObsFreq: 299.96 MHz   
 ObsSet: 1.0 kHz   
 ObsPine: 995.0047 Hz   
 Point: 16384   
 Frequency (Span): 4500.45 Hz   
 Scan: 16   
 AcqTime: 3.4983 s   
 PD: 1.502 s   
 Pulse1: 6.0 μs   
 Temperature: 29.0 °C   
 Solvent: CDCl<sub>3</sub>   
 Reference: 0.0 ppm   
 Broad. Factor: 0.1373 Hz   
 RGain: 30   
 Printed: 2010/May/02 15:31:32   
 Operator:

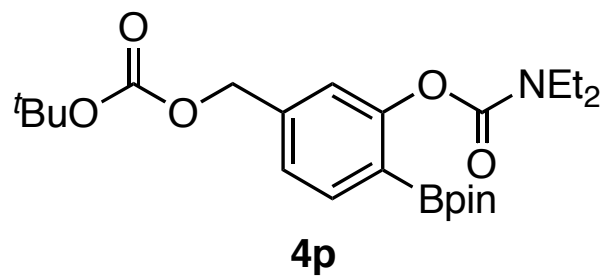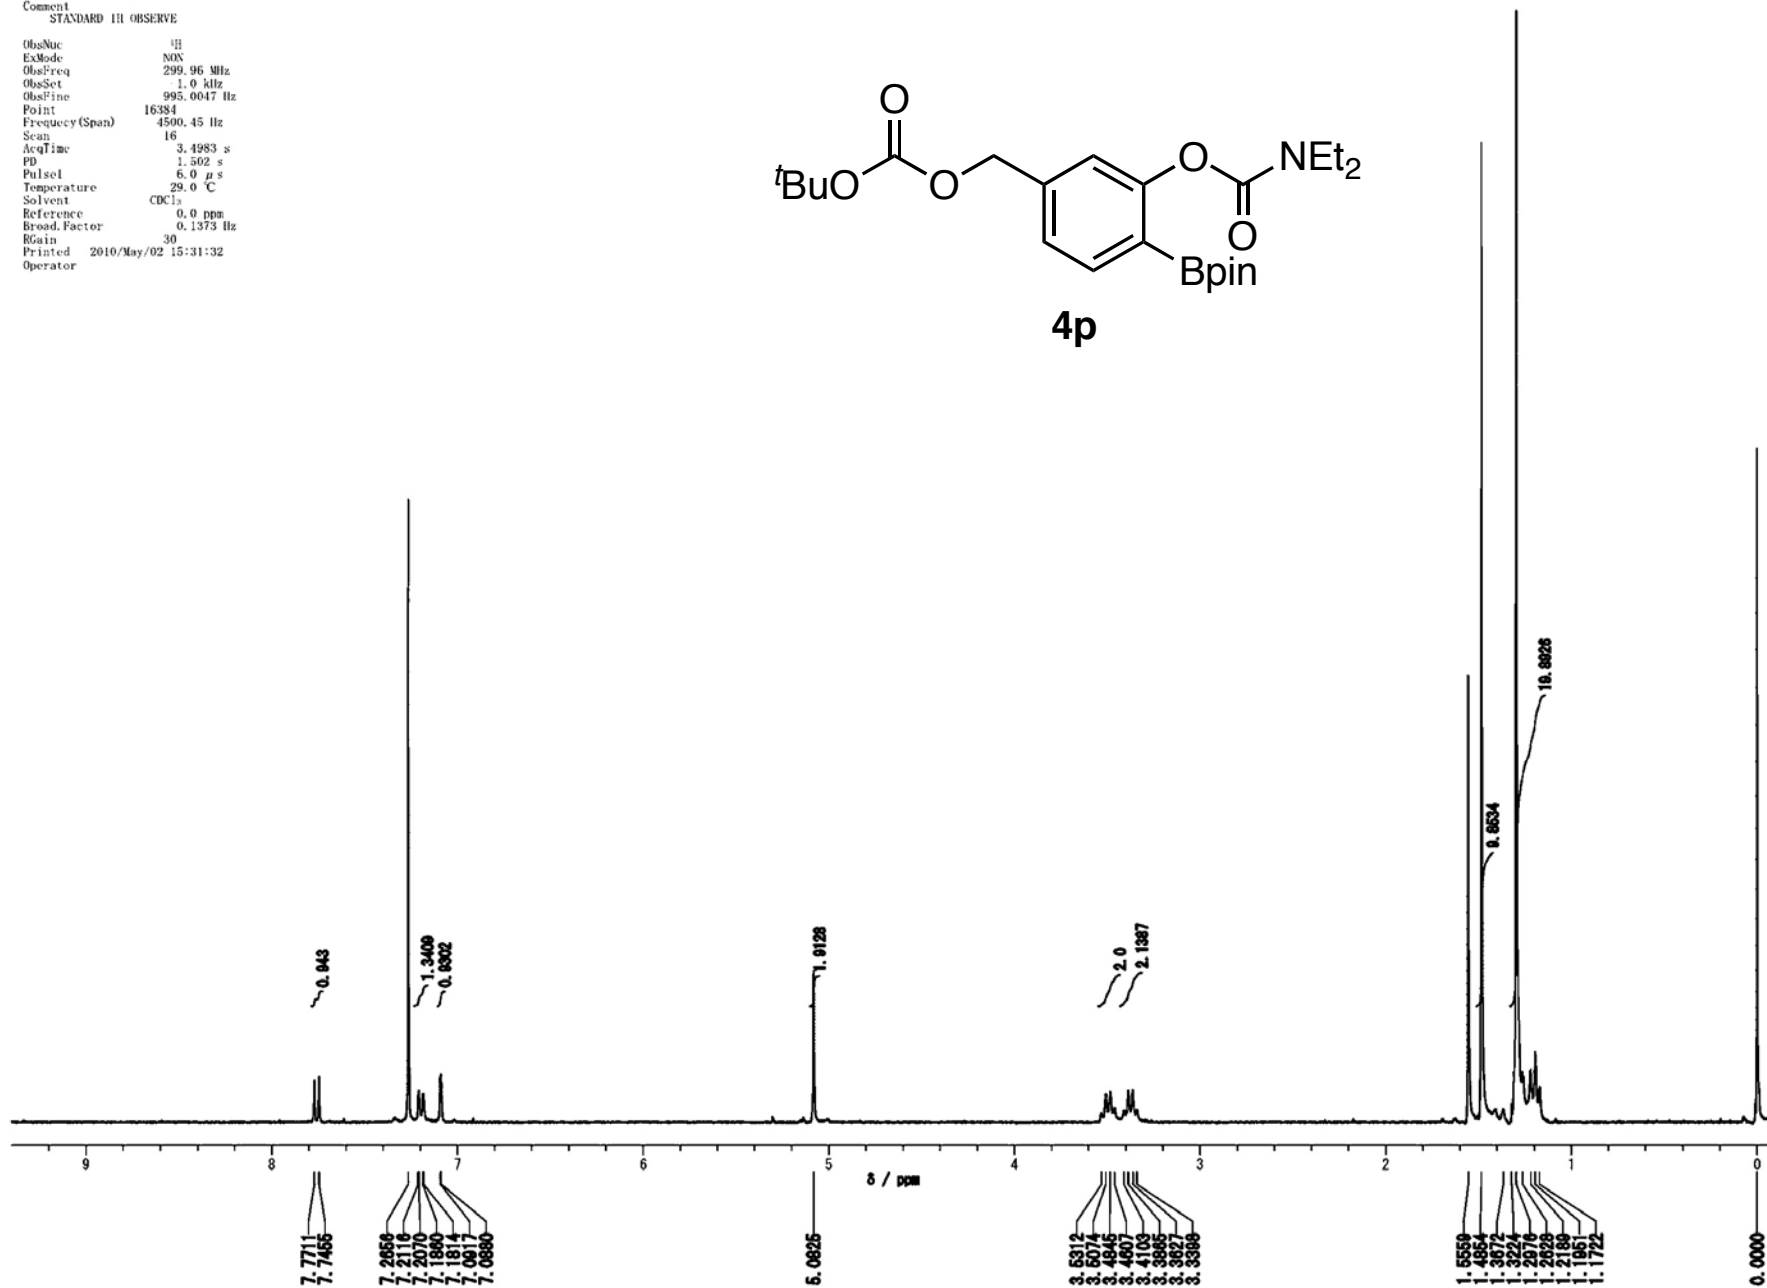

413 station observe  
 Stick:none Tune=6.4 Match=0.4  
 ObsNuc  $^{13}\text{C}$   
 ExMode MQR  
 ObsFreq 75.43 MHz  
 ObsSet -1.0 kHz  
 ObsFine 996.3672 Hz  
 Point 32768  
 Frequency (Span) 18761.73 Hz  
 Scan 61  
 AcqTime 1.4992 s  
 PD 1.501 s  
 Pulse1 6.0  $\mu\text{s}$   
 Temperature 29.0  $^{\circ}\text{C}$   
 Solvent  $\text{CDCl}_3$   
 Reference 77.0 ppm  
 Broad.Factor 0.25 Hz  
 RGain 30  
 Printed 2010/May/02 15:34:34  
 Operator

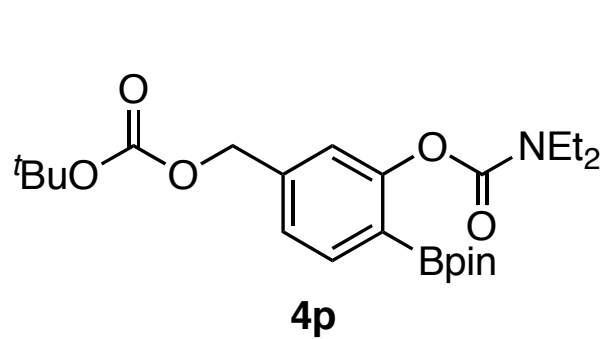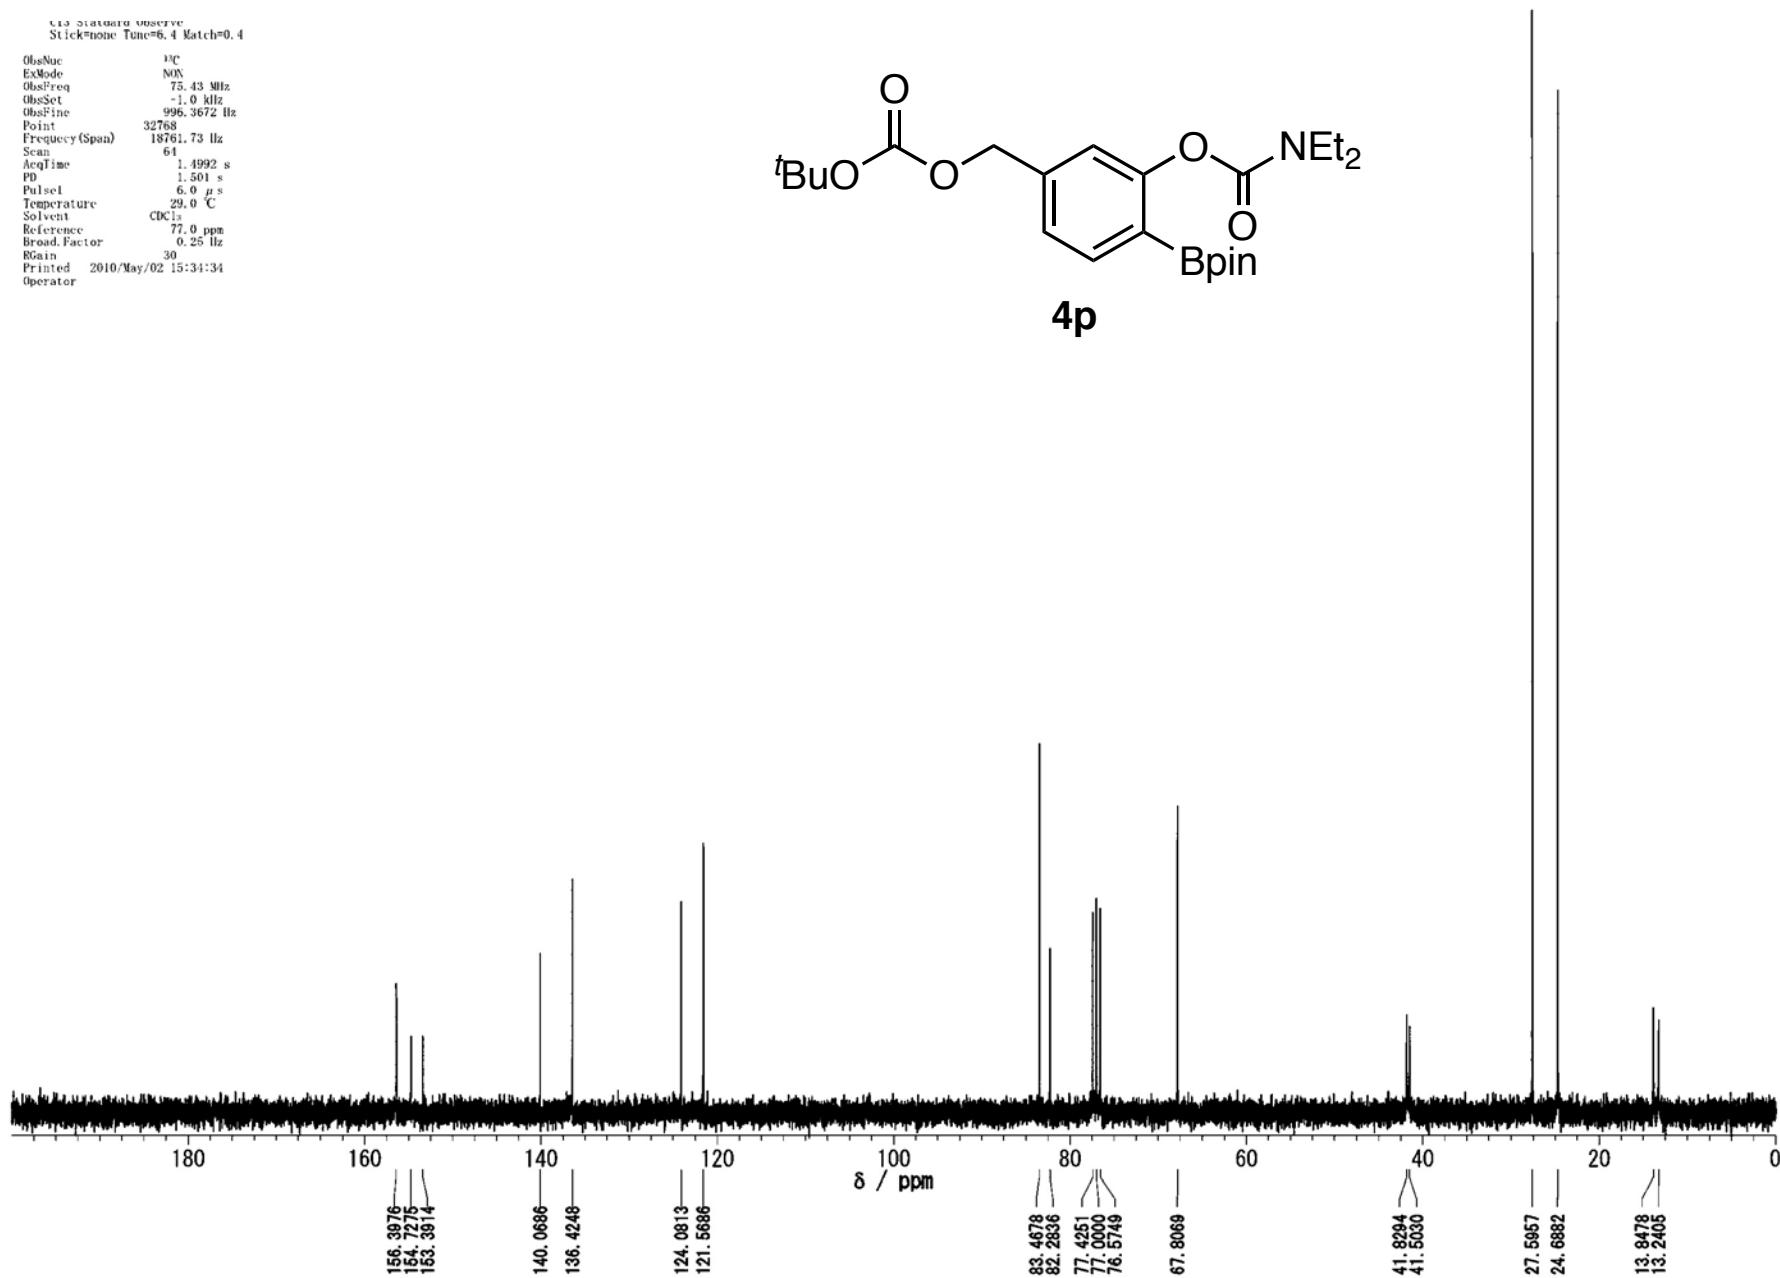

Original File:   
 Date: Feb 24 10   
 Comment: STANDARD 1H OBSERVE   
 ObsNuc: <sup>1</sup>H   
 ExMode: NON   
 ObsFreq: 299.96 MHz   
 ObsSet: 1.0 kHz   
 ObsPine: 995.0047 Hz   
 Point: 16384   
 Frequency (Span): 4500.45 Hz   
 Scan: 16   
 AcqTime: 3.4983 s   
 PD: 1.502 s   
 Pulse1: 6.0 μs   
 Temperature: 29.0 °C   
 Solvent: CDCl<sub>3</sub>   
 Reference: 0.0 ppm   
 Broad. Factor: 0.1373 Hz   
 RGain: 19   
 Printed: 2010/Jun/24 14:59:26   
 Operator:

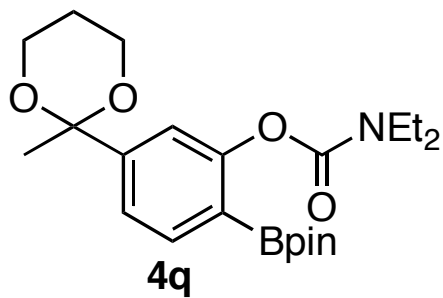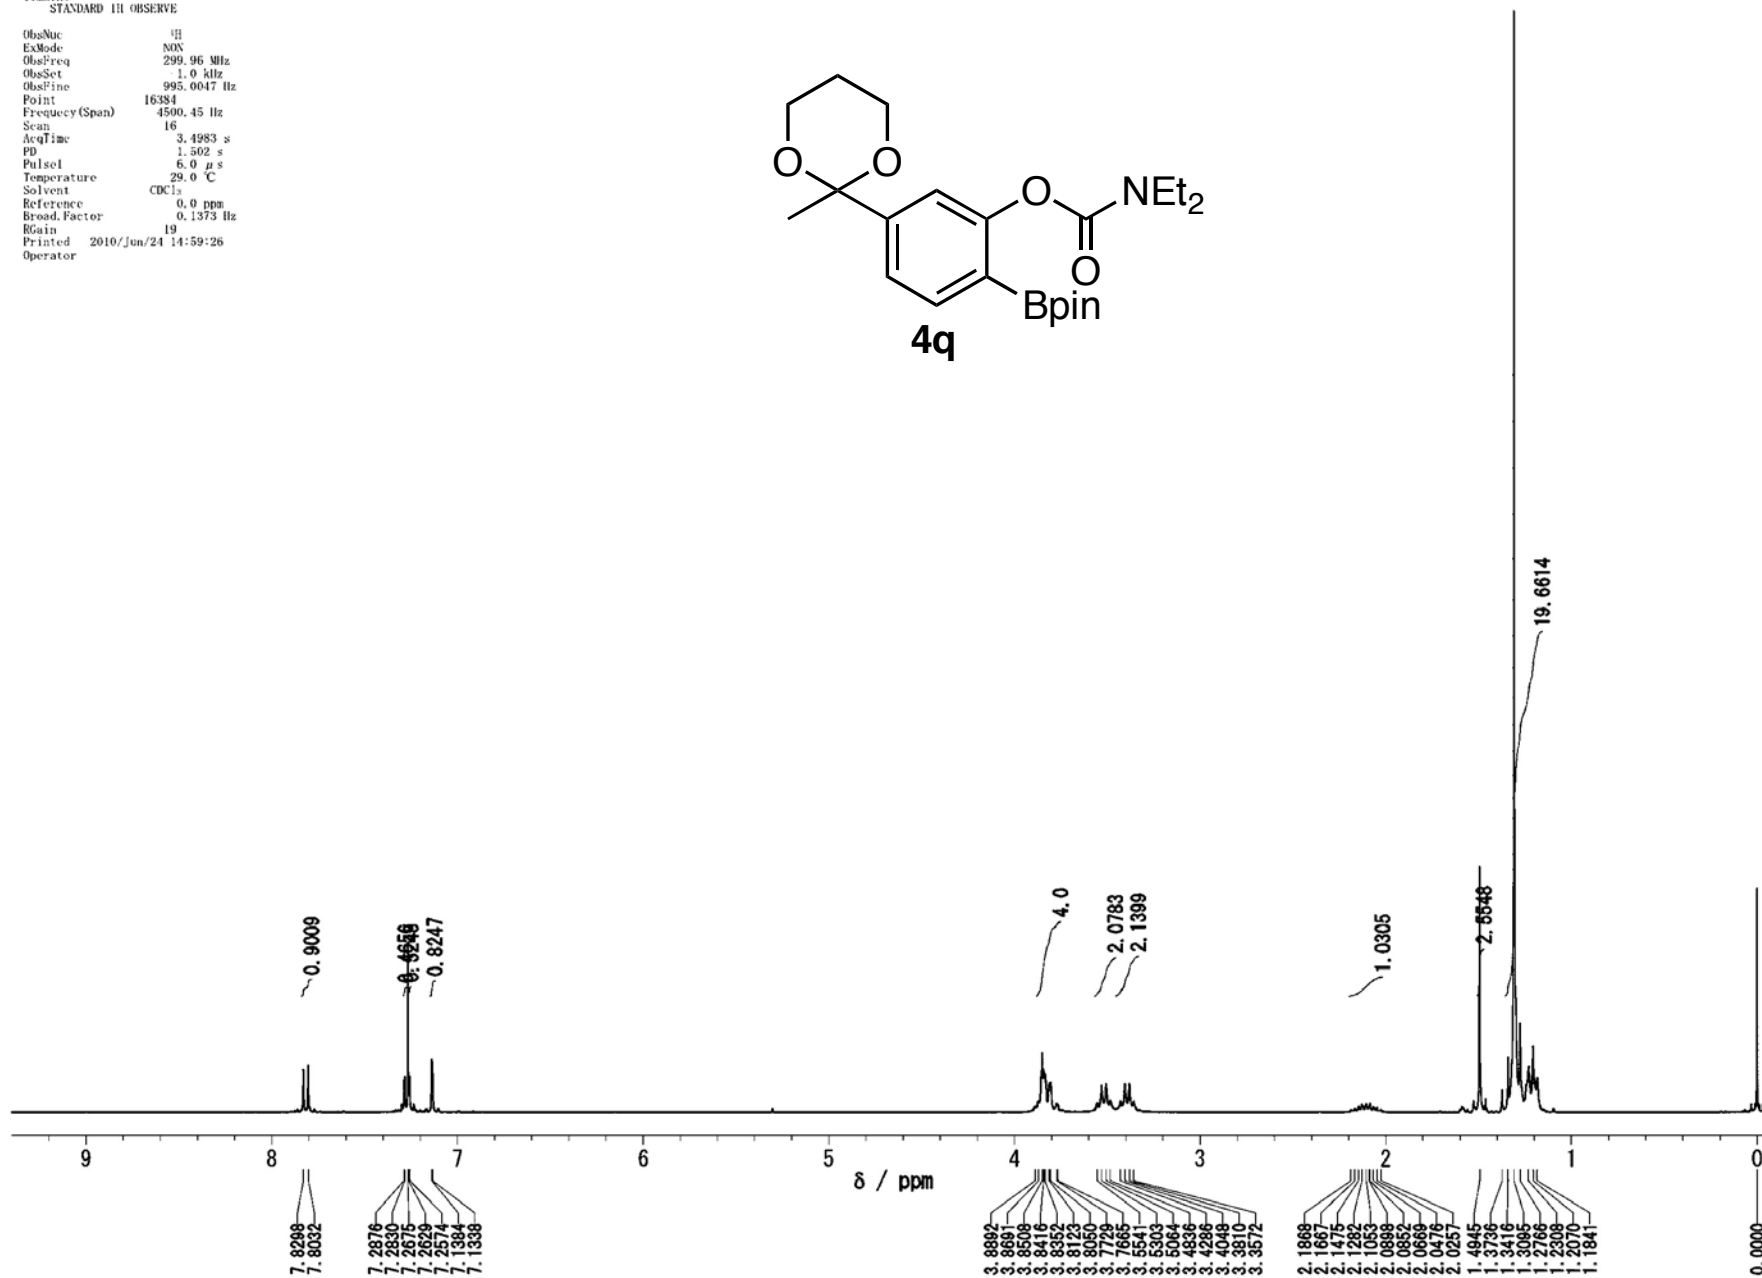



Original File:  
Date Feb 25 10  
Comment  
C13 Standard Observe  
Stick\*none Tune=6.4 Match=0.4

ObsNuc  $^{13}\text{C}$   
ExMode NOX  
ObsFreq 75.43 MHz  
ObsSet 1.0 kHz  
ObsFine 996.3672 Hz  
Point 32768  
Frequency (Span) 18761.73 Hz  
Scan 128  
AcqTime 1.4992 s  
PD 1.501 s  
Pulse1 6.0  $\mu\text{s}$   
Temperature 29.0  $^{\circ}\text{C}$   
Solvent  $\text{CDCl}_3$   
Reference 77.0 ppm  
Broad.Factor 0.2863 Hz  
RGain 30  
Printed 2010/May/02 15:43:50  
Operator

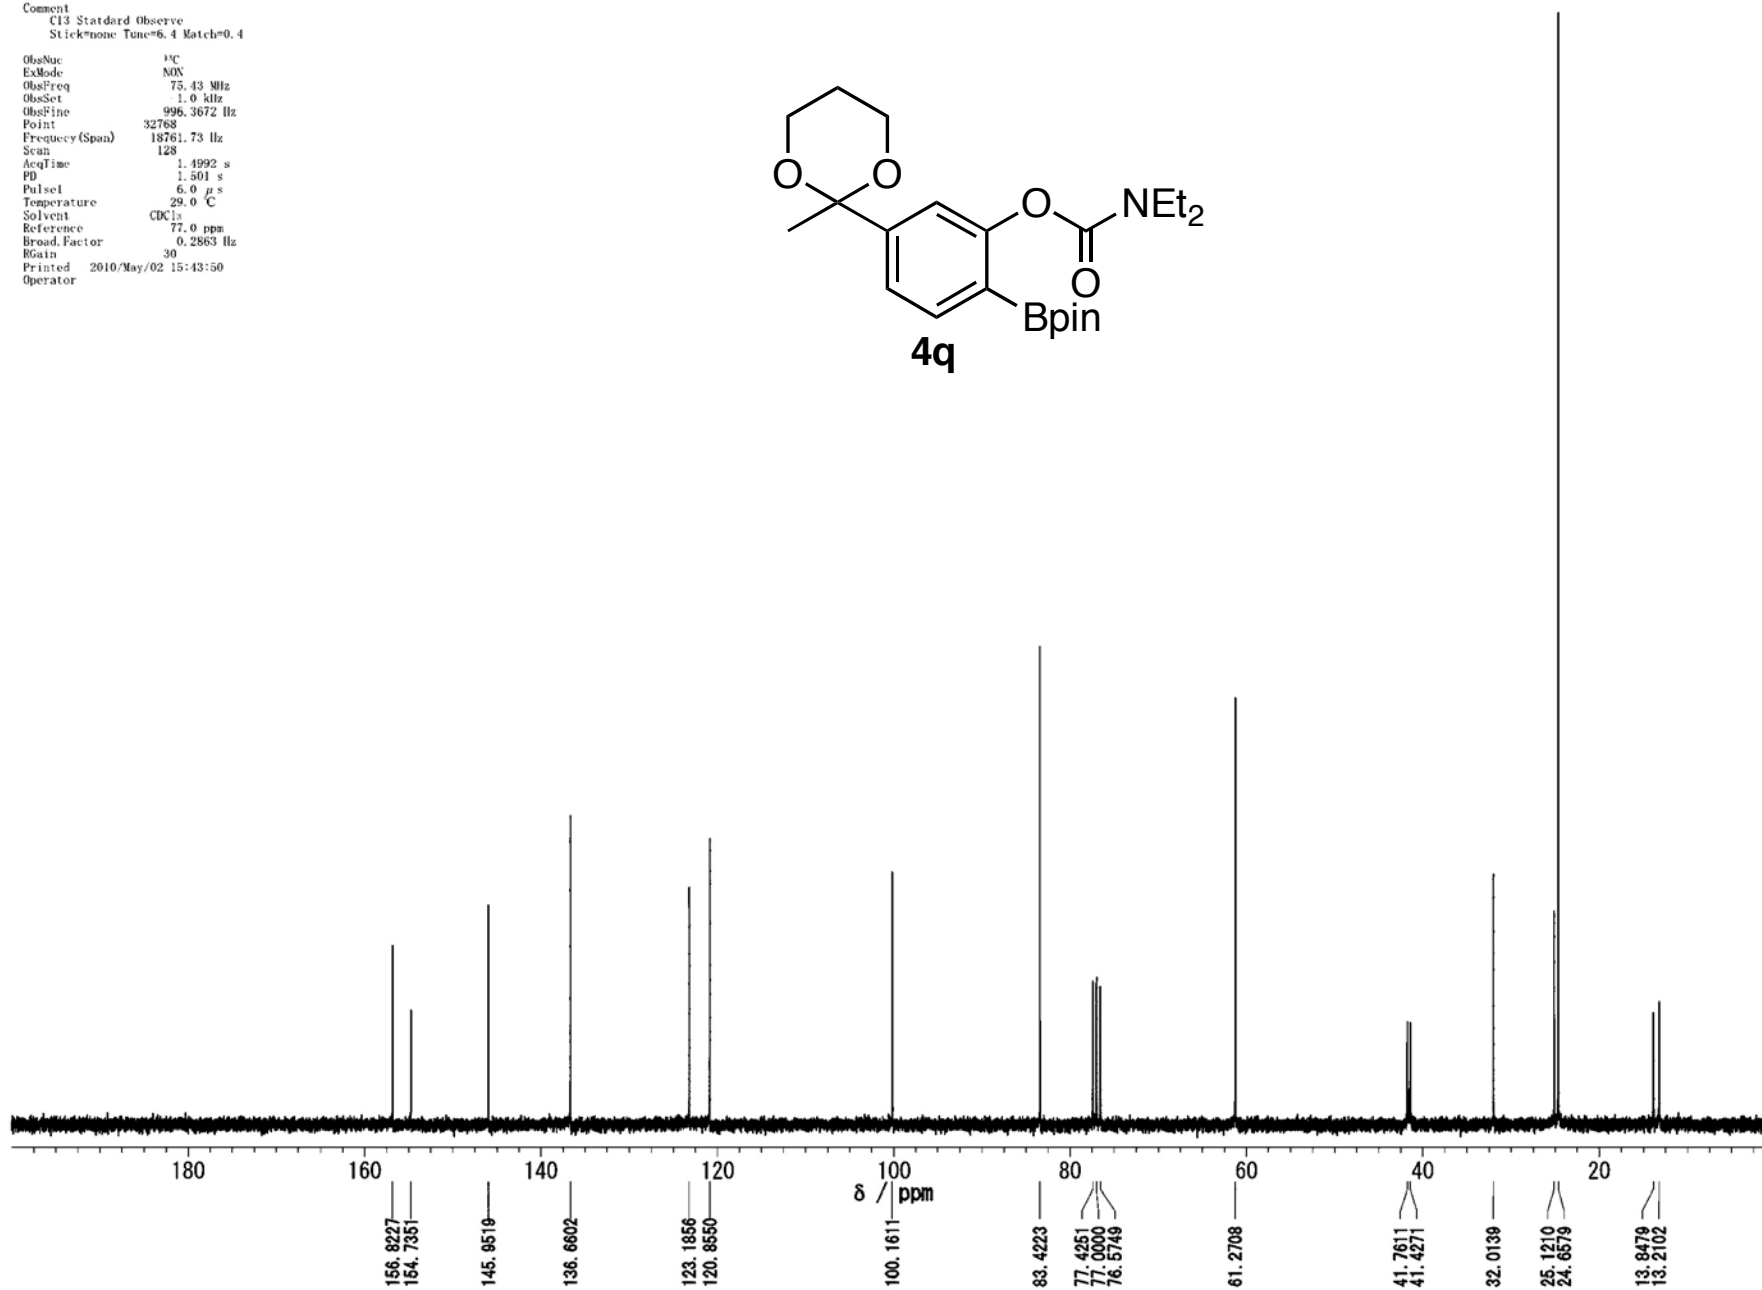

Original File: Oct 3 09  
 Date: Oct 3 09  
 Comment: STANDARD 1H OBSERVE  
 ObsNuc:  $^1\text{H}$   
 ExMode: NON  
 ObsFreq: 299.96 MHz  
 ObsSet: 1.0 kHz  
 ObsPine: 995.0047 Hz  
 Point: 16384  
 Frequency (Span): 4500.45 Hz  
 Scan: 16  
 AcqTime: 3.4983 s  
 PD: 1.502 s  
 Pulse1: 6.0  $\mu$ s  
 Temperature: 29.0  $^{\circ}\text{C}$   
 Solvent:  $\text{CDCl}_3$   
 Reference: 0.0 ppm  
 Broad. Factor: 0.1373 Hz  
 RGain: 24  
 Printed: 2010/May/02 15:54:10  
 Operator:

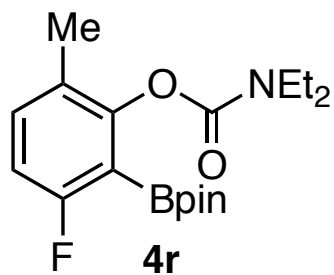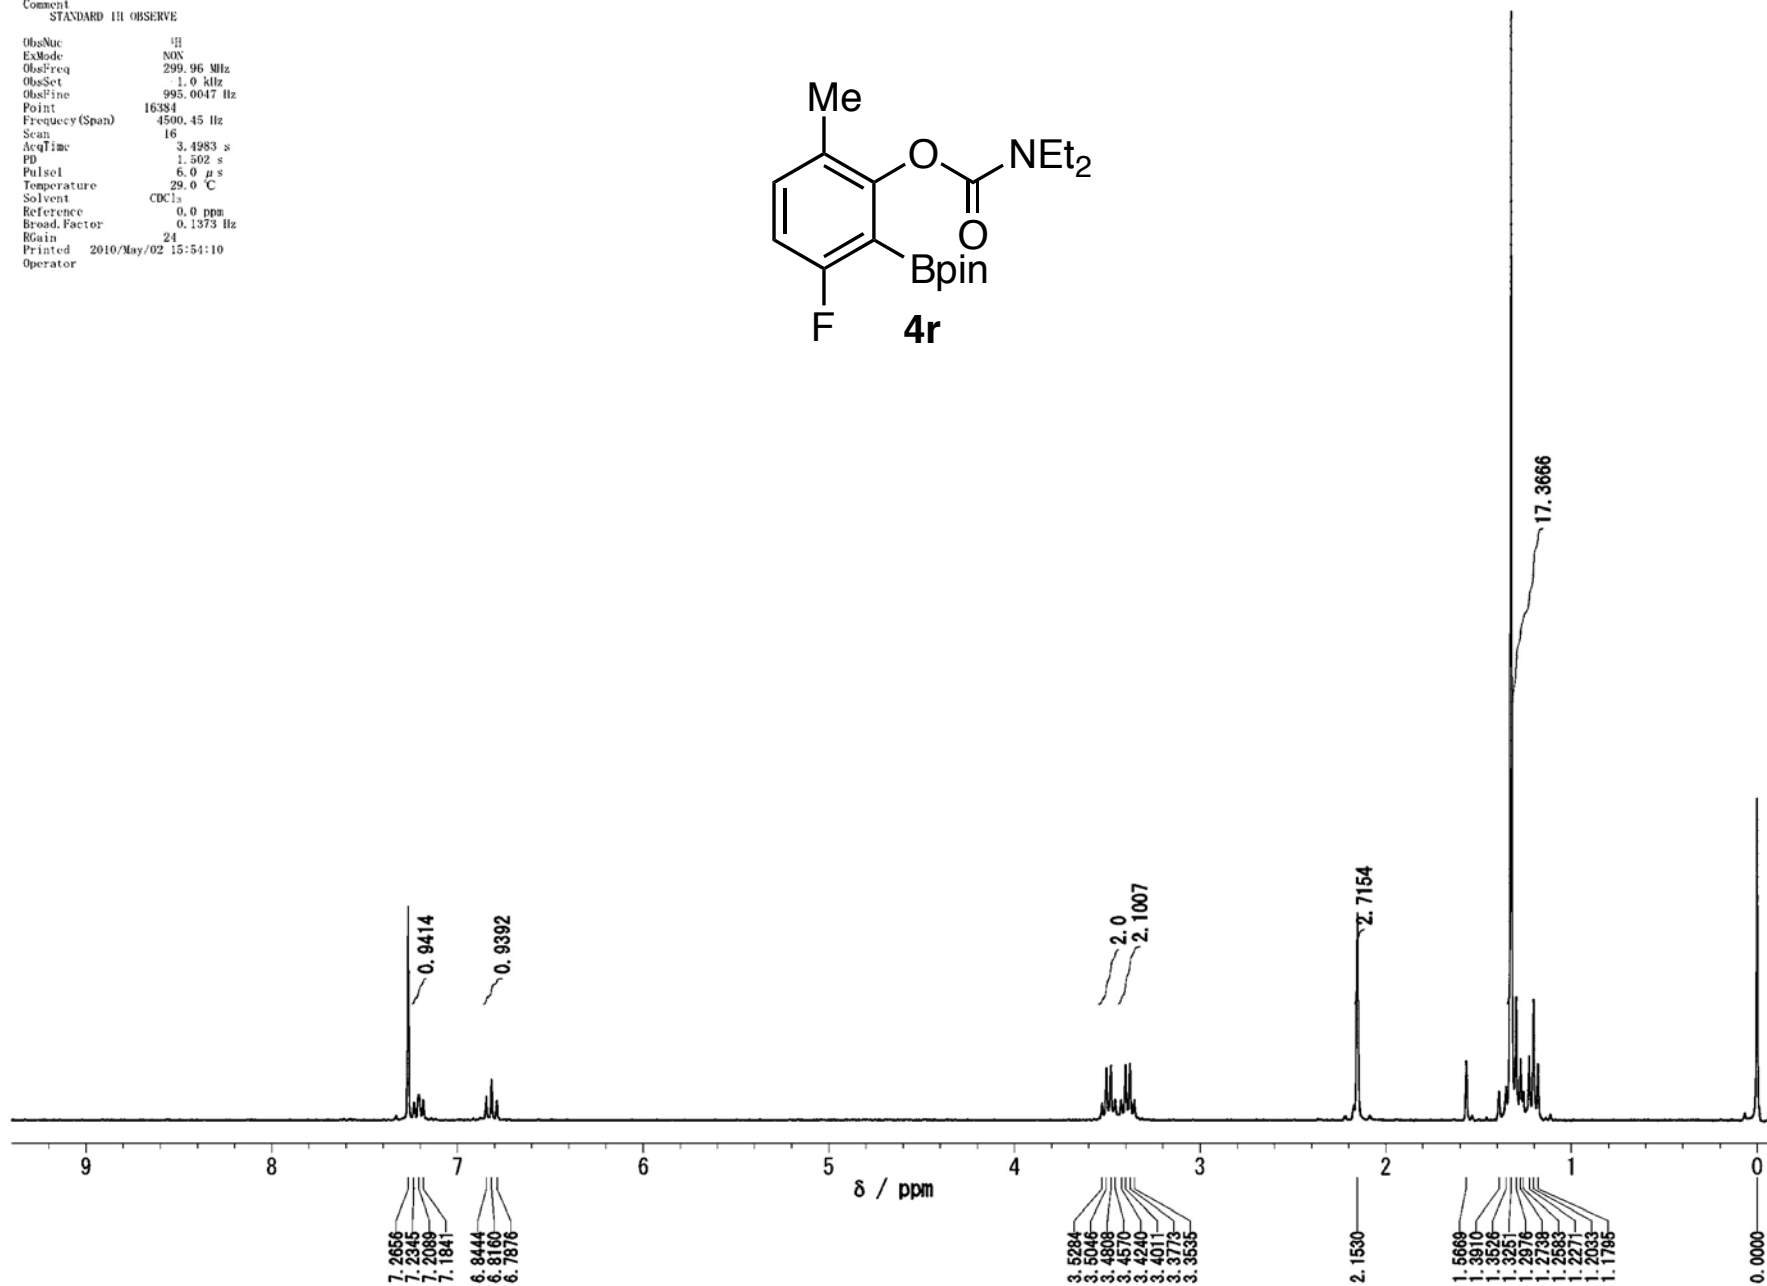

Original File:  
 Date Feb 22 10  
 Comment  
 C13 Standard Observe  
 Stick\*none Tune=6.4 Match=0.4

ObsNuc  $^{13}\text{C}$   
 ExMode NOX  
 ObsFreq 75.43 MHz  
 ObsSet 1.0 kHz  
 ObsFine 996.3672 Hz  
 Point 32768  
 Frequency (Span) 18761.73 Hz  
 Scan 128  
 AcqTime 1.4992 s  
 PD 1.501 s  
 Pulse1 6.0  $\mu\text{s}$   
 Temperature 29.0  $^{\circ}\text{C}$   
 Solvent  $\text{CDCl}_3$   
 Reference 77.0 ppm  
 Broad.Factor 0.2863 Hz  
 RGain 30  
 Printed 2010/May/02 15:56:04  
 Operator

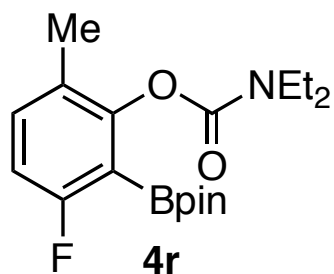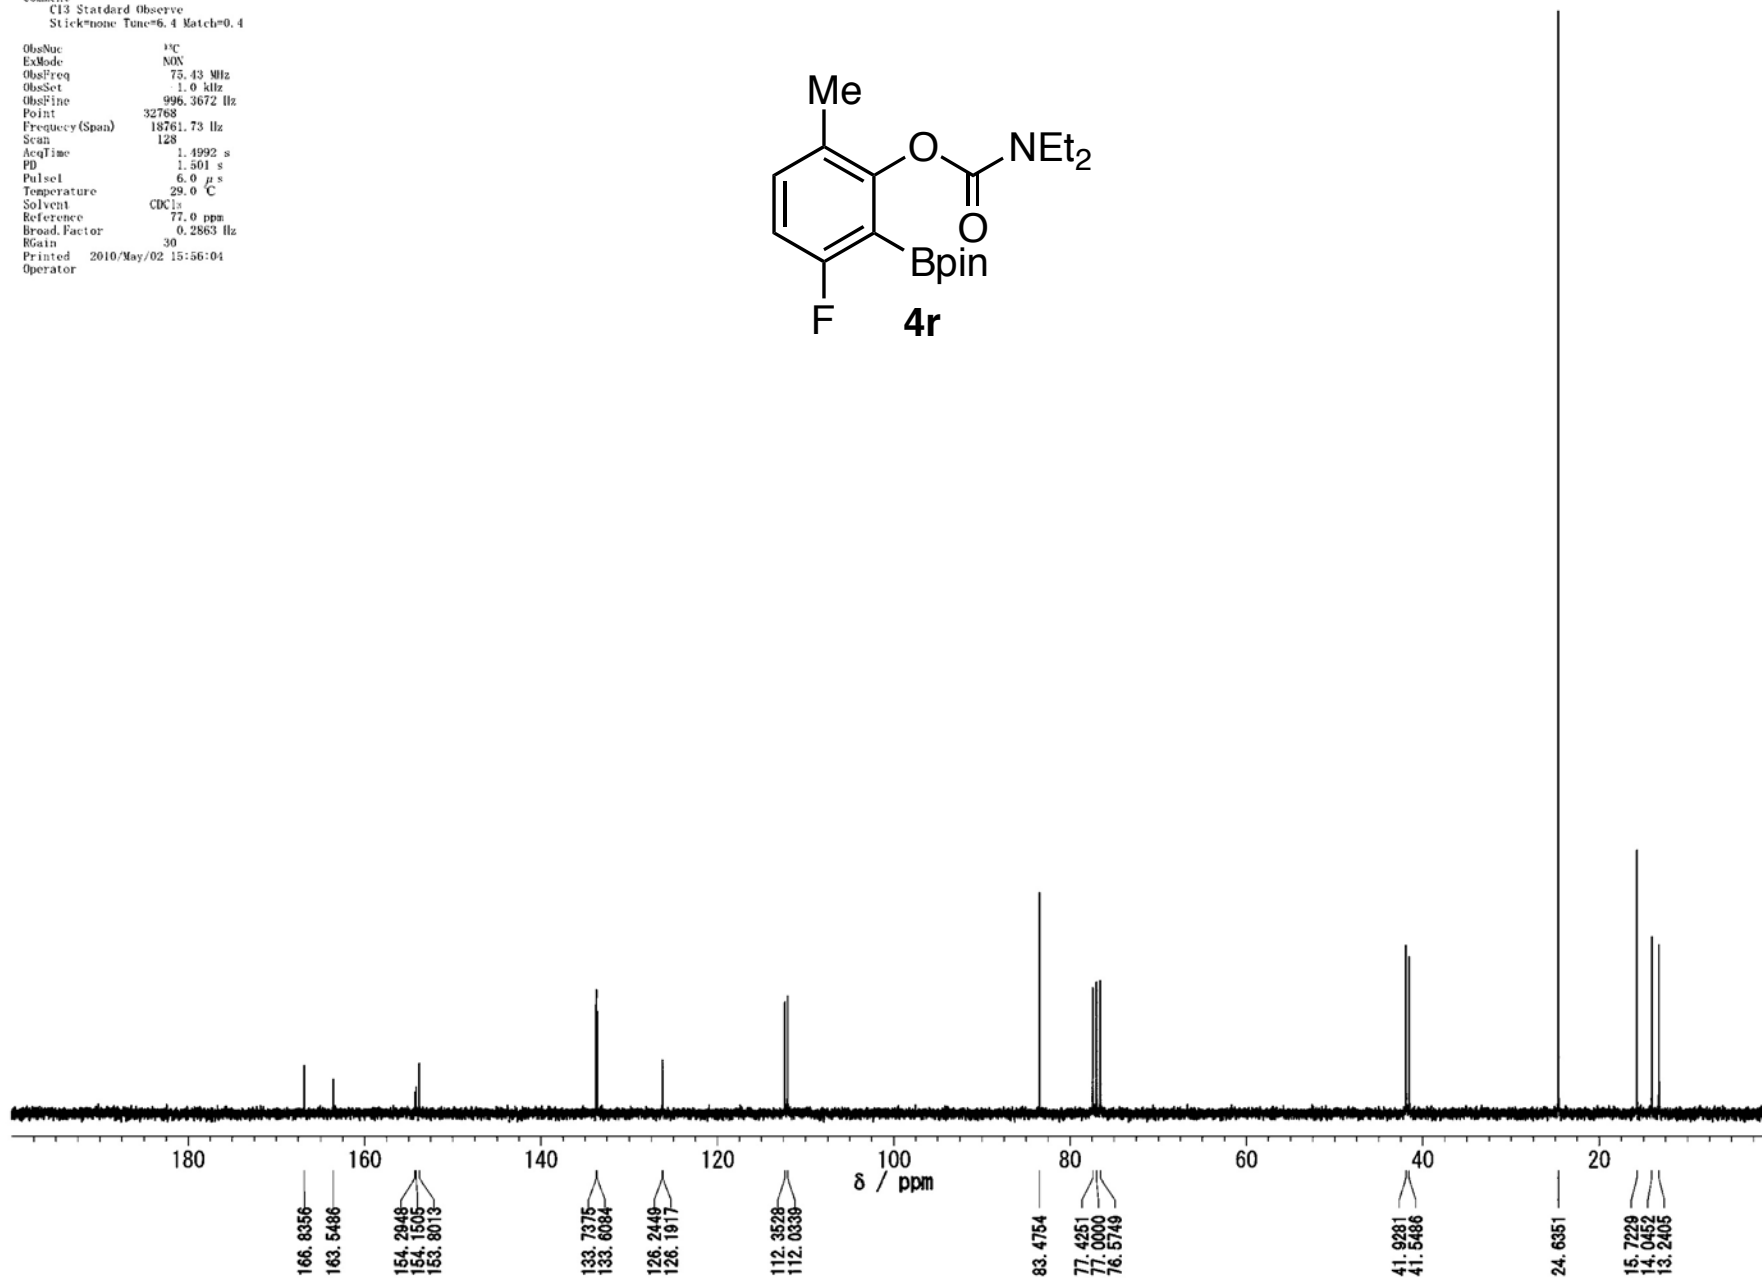

Original File: May 8 10  
 Date: May 8 10  
 Comment: STANDARD 1H OBSERVE  
 ObsNuc: <sup>1</sup>H  
 ExMode: NON  
 ObsFreq: 299.96 MHz  
 ObsSet: 1.0 kHz  
 ObsPine: 995.0047 Hz  
 Point: 16384  
 Frequency (Span): 4500.45 Hz  
 Scan: 16  
 AcqTime: 3.4983 s  
 PD: 1.502 s  
 Pulse1: 6.0  $\mu$ s  
 Temperature: 29.0  $^{\circ}$ C  
 Solvent: CDCl<sub>3</sub>  
 Reference: 0.0 ppm  
 Broad. Factor: 0.1373 Hz  
 RGain: 30  
 Printed: 2010/Jun/24 15:01:35  
 Operator:

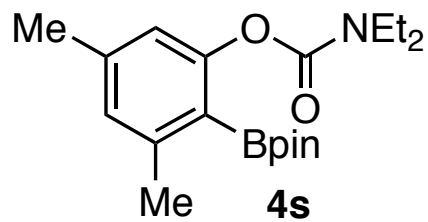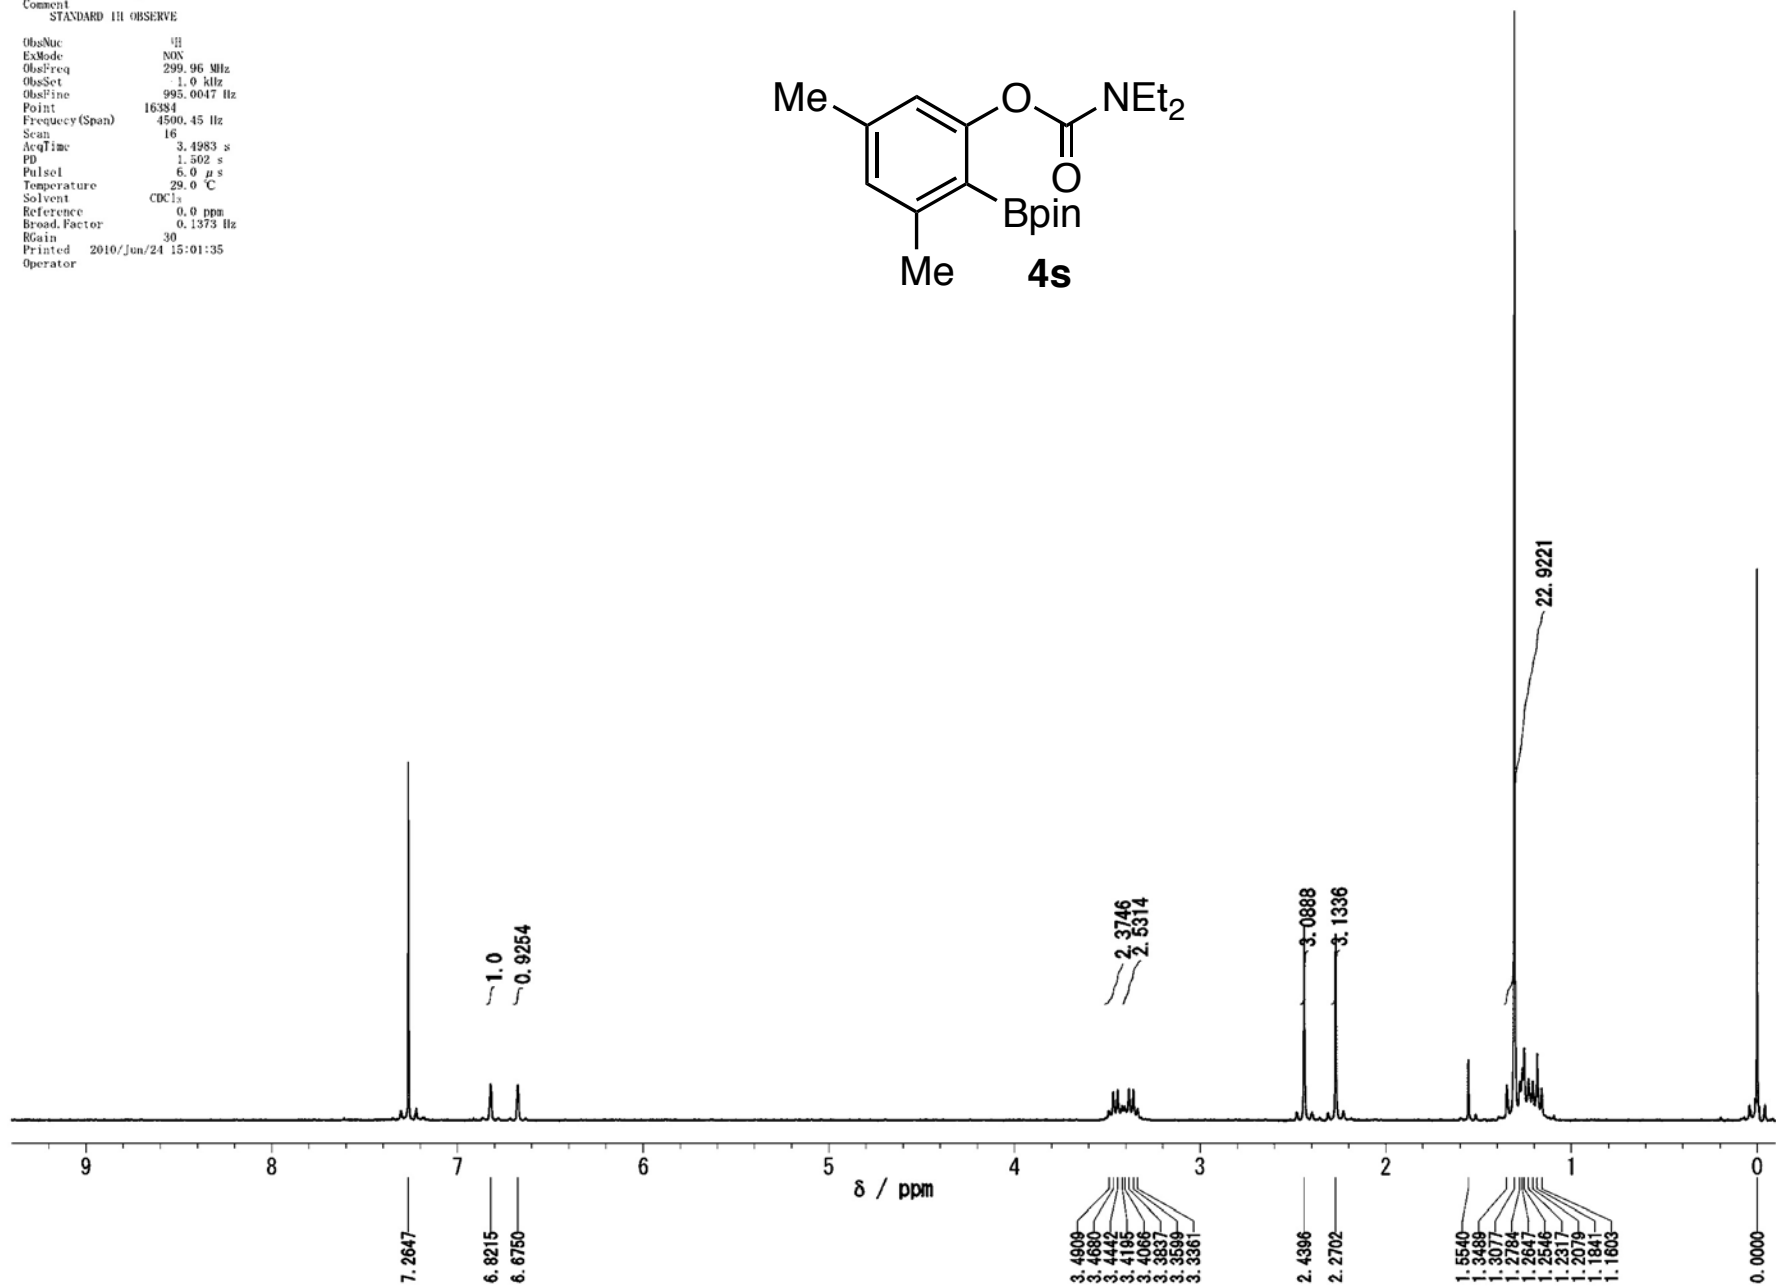

id

Comment  
C13 Standard Observe  
Stick\*none Tune=6.4 Match=0.4

ObsNuc  $^{13}\text{C}$   
ExMode NOX  
ObsFreq 75.43 MHz  
ObsSet 1.0 kHz  
ObsFine 996.3672 Hz  
Point 32768  
Frequency (Span) 18761.73 Hz  
Scan 256  
AcqTime 1.4992 s  
PD 1.501 s  
Pulse1 6.0  $\mu\text{s}$   
Temperature 29.0  $^{\circ}\text{C}$   
Solvent  $\text{CDCl}_3$   
Reference 77.0 ppm  
Broad.Factor 0.25 Hz  
RGain 30  
Printed 2010/May/14 17:14:58  
Operator

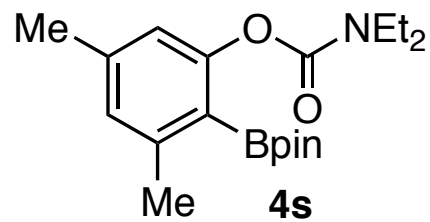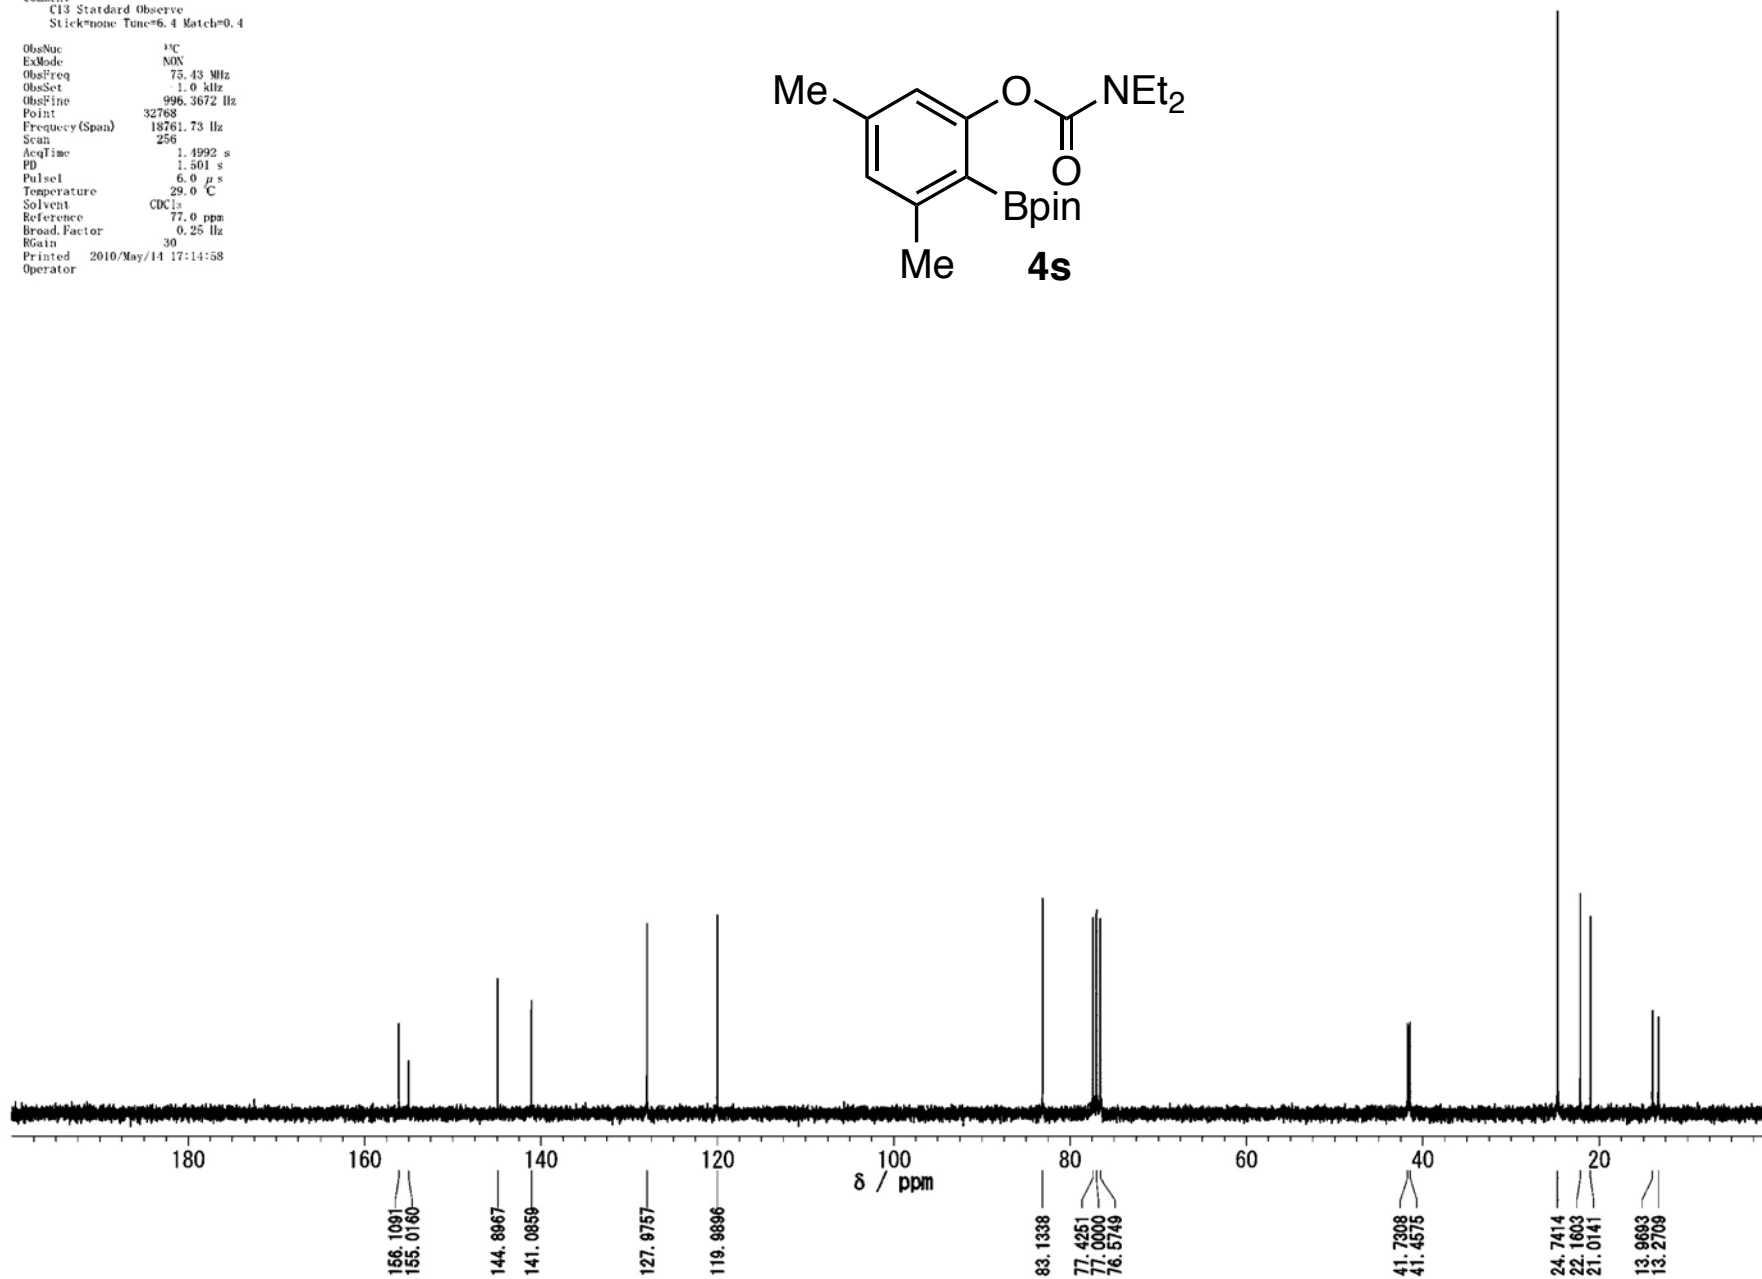

Supplement: Supplementary file 1 [file 4404940]
